# Supplementary material for: Cork-derived magnetic composites: a preliminary study
Source: Royal Society of Chemistry journal article supplement (doi:10.1039/d4su00442f), 2024-12-11
Supplement: d4su00442f1.xlsx [file d4su00442f1.xlsx]

## Sheet: Figure 1a
FC1 N2		FC3 N2		FC1 air		FC3 air
0.99794	3.19306	0.99223	4.30506	1.00333	1.20958	1.0002	5.00661
0.99794	3.19368	0.99314	4.30596	1.00333	1.21162	1.00056	5.00593
0.99938	3.19444	0.99223	4.30719	1.00392	1.21361	1.00056	5.00587
0.99971	3.19492	0.99351	4.3083	1.00406	1.21428	1.00056	5.00486
1.00004	3.19522	0.99223	4.30702	1.0042	1.2144	1.00056	5.00471
0.94358	3.17143	0.95873	4.28406	1.00463	1.2111	0.96363	4.98012
0.94358	3.17017	0.95873	4.28484	1.00463	1.21224	0.96363	4.9804
0.94358	3.16845	0.95905	4.28595	1.00463	1.21268	0.96363	4.97916
0.94358	3.16729	0.95873	4.28477	1.00463	1.21257	0.96332	4.9775
0.94362	3.16786	0.95879	4.28548	1.00474	1.21248	0.96326	4.97779
0.89672	3.13948	0.93032	4.26418	0.9001	1.13612	0.93546	4.95002
0.8957	3.13825	0.93079	4.26328	0.8997	1.13541	0.93546	4.94984
0.89549	3.13719	0.93079	4.25968	0.8993	1.13471	0.9351	4.94931
0.89527	3.13684	0.93008	4.25399	0.89916	1.1339	0.93503	4.94872
0.89672	3.13655	0.93079	4.2554	0.89916	1.13392	0.93496	4.94805
0.847	3.10775	0.90138	4.23417	0.80222	1.05769	0.90613	4.9243
0.847	3.10792	0.90129	4.23409	0.80222	1.05641	0.90601	4.92337
0.847	3.10926	0.90138	4.2358	0.80128	1.05571	0.90588	4.92296
0.847	3.10918	0.90138	4.2344	0.80108	1.0556	0.90671	4.92317
0.84673	3.10725	0.90151	4.23387	0.80089	1.05538	0.90671	4.92222
0.79795	3.07688	0.87245	4.20854	0.70197	0.96935	0.87675	4.88936
0.79773	3.07558	0.87342	4.2081	0.70197	0.96869	0.87648	4.88817
0.79751	3.07399	0.87256	4.20708	0.70197	0.96742	0.87648	4.88791
0.7973	3.0732	0.87342	4.20709	0.70197	0.96662	0.87648	4.88879
0.79884	3.07261	0.87342	4.20761	0.70159	0.96638	0.87648	4.89042
0.74813	3.03198	0.84376	4.1801	0.60219	0.87317	0.84754	4.86443
0.74813	3.03001	0.84313	4.17804	0.60143	0.87183	0.84746	4.86293
0.74813	3.0293	0.84376	4.1798	0.60136	0.87045	0.84746	4.86123
0.74813	3.03003	0.84329	4.18094	0.60136	0.86888	0.84746	4.85957
0.74779	3.03142	0.84376	4.17964	0.60136	0.86745	0.84746	4.85925
0.69905	2.99194	0.81387	4.14653	0.50367	0.76671	0.81835	4.82714
0.69866	2.99027	0.81387	4.14711	0.50189	0.76535	0.81835	4.82725
0.69827	2.98836	0.81364	4.14798	0.50154	0.76492	0.81835	4.82575
0.70087	2.98633	0.81387	4.14841	0.50119	0.76381	0.81835	4.82404
0.70087	2.98604	0.81362	4.14885	0.50367	0.76264	0.81791	4.82303
0.64879	2.94341	0.78481	4.11783	0.4018	0.64368	0.78865	4.78043
0.64879	2.94338	0.7846	4.11681	0.4018	0.64261	0.78865	4.77835
0.64879	2.94234	0.78512	4.11604	0.40096	0.64239	0.78865	4.77835
0.64825	2.94093	0.78418	4.11463	0.40078	0.64241	0.78826	4.77868
0.64812	2.93994	0.78512	4.11562	0.4006	0.64239	0.78818	4.77826
0.59916	2.89202	0.75507	4.08418	0.30058	0.50839	0.75952	4.74003
0.59879	2.89184	0.75489	4.0817	0.30058	0.50795	0.75879	4.73906
0.59842	2.8909	0.75477	4.08321	0.30058	0.50799	0.75862	4.73749
0.60104	2.88838	0.75507	4.08548	0.30058	0.50801	0.75845	4.73724
0.60104	2.88601	0.75492	4.0844	0.30021	0.50793	0.75829	4.73715
0.54903	2.83698	0.7251	4.044	0.20071	0.35841	0.72925	4.69314
0.54903	2.83678	0.72616	4.04098	0.20014	0.35717	0.72908	4.69148
0.54903	2.83573	0.72537	4.04301	0.19957	0.35598	0.72892	4.69039
0.54842	2.83496	0.72517	4.0428	0.19952	0.35466	0.72887	4.68955
0.54829	2.83344	0.72616	4.04099	0.19952	0.35444	0.72887	4.68896
0.49897	2.76472	0.69583	4.00852	0.09968	0.18337	0.69905	4.64659
0.49856	2.76439	0.69558	4.00573	0.09937	0.18338	0.69905	4.6442
0.49816	2.76432	0.69583	4.00625	0.09907	0.18254	0.69905	4.6426
0.4981	2.76439	0.69558	4.00496	0.09876	0.18195	0.69905	4.64192
0.4981	2.7648	0.69583	4.00557	0.10097	0.18093	0.69905	4.64054
0.44914	2.68683	0.66573	3.96625	0.000402069	-0.00775	0.66982	4.5905
0.44914	2.68573	0.66573	3.96566	0.000104496	-0.00933	0.66982	4.5891
0.4486	2.68441	0.66559	3.96558	-0.000192482	-0.00987	0.66982	4.58897
0.44849	2.68307	0.66573	3.96424	-0.000489758	-0.0106	0.66982	4.58833
0.44839	2.68231	0.66576	3.9637	0.00163	-0.01205	0.66914	4.58759
0.39876	2.59019	0.6362	3.91971	-0.10194	-0.20705	0.63994	4.52916
0.39832	2.59063	0.63587	3.91801	-0.10194	-0.20843	0.63994	4.52886
0.39832	2.58955	0.63669	3.91612	-0.10194	-0.20976	0.63926	4.52894
0.39832	2.58826	0.6358	3.91701	-0.10249	-0.21106	0.63911	4.52896
0.39832	2.58834	0.63669	3.91676	-0.10261	-0.21118	0.63897	4.52917
0.34976	2.47793	0.60632	3.87236	-0.20145	-0.37731	0.61041	4.47221
0.34891	2.47606	0.60602	3.87119	-0.20245	-0.37877	0.60966	4.47057
0.34872	2.4733	0.60583	3.86778	-0.20246	-0.37918	0.6095	4.46967
0.34852	2.4718	0.60632	3.86942	-0.20246	-0.3792	0.60935	4.46892
0.34833	2.47201	0.60564	3.86918	-0.20246	-0.37921	0.61041	4.46726
0.29884	2.33688	0.57603	3.81555	-0.30048	-0.52829	0.58001	4.4021
0.2987	2.33361	0.57696	3.81509	-0.30086	-0.52923	0.57976	4.40128
0.2987	2.33119	0.57603	3.81219	-0.30124	-0.53053	0.57952	4.40061
0.2987	2.32959	0.5758	3.81193	-0.30161	-0.53181	0.58113	4.40023
0.2987	2.32936	0.57696	3.81015	-0.29896	-0.53211	0.58113	4.39935
0.24881	2.15471	0.54658	3.75615	-0.40002	-0.66453	0.54963	4.32909
0.24853	2.15164	0.54595	3.75384	-0.40002	-0.66482	0.54936	4.32707
0.24824	2.14949	0.54658	3.75324	-0.40098	-0.66375	0.54931	4.32577
0.25009	2.1483	0.5462	3.75303	-0.40118	-0.66484	0.54931	4.32463
0.25009	2.14748	0.54658	3.75286	-0.40138	-0.66475	0.54931	4.32198
0.19881	1.92707	0.5161	3.69187	-0.49978	-0.78136	0.51936	4.24589
0.19881	1.92418	0.5161	3.69053	-0.49978	-0.78261	0.51919	4.24327
0.19831	1.92233	0.5161	3.6884	-0.49978	-0.78352	0.51919	4.24123
0.19819	1.91983	0.5161	3.68798	-0.49978	-0.78353	0.51919	4.24011
0.19807	1.91817	0.51588	3.68876	-0.50051	-0.78585	0.51919	4.23978
0.14902	1.63024	0.48676	3.60927	-0.60033	-0.89269	0.48937	4.1524
0.14849	1.62483	0.4865	3.61106	-0.60064	-0.89196	0.48937	4.15042
0.14832	1.62058	0.48714	3.61295	-0.60064	-0.8912	0.48937	4.14955
0.14832	1.61754	0.4863	3.61304	-0.60064	-0.89115	0.48937	4.14928
0.14832	1.61575	0.48714	3.61138	-0.60064	-0.89102	0.48907	4.14849
0.09883	1.21736	0.45642	3.5372	-0.70019	-0.98419	0.45987	4.05599
0.09801	1.21245	0.45646	3.53545	-0.70075	-0.98617	0.45987	4.05277
0.09784	1.20783	0.45649	3.53288	-0.70132	-0.9876	0.45987	4.05079
0.09767	1.20565	0.45642	3.53331	-0.70152	-0.98789	0.45935	4.04907
0.09883	1.20323	0.45638	3.53548	-0.70152	-0.98788	0.45923	4.04864
0.04813	0.68597	0.42694	3.45018	-0.80141	-1.07262	0.43018	3.94522
0.04813	0.67557	0.42786	3.44724	-0.80169	-1.07266	0.43018	3.94371
0.04813	0.66814	0.4269	3.4465	-0.80197	-1.0726	0.42935	3.94342
0.04813	0.6631	0.42666	3.44626	-0.80225	-1.07332	0.42917	3.94129
0.04763	0.65868	0.42786	3.44494	-0.80022	-1.07494	0.429	3.93958
-0.00424	-0.04944	0.39708	3.35002	-0.90117	-1.15347	0.39975	3.8288
-0.00424	-0.04943	0.39674	3.3463	-0.90182	-1.15423	0.39953	3.82566
-0.00424	-0.04886	0.39708	3.34436	-0.90198	-1.15422	0.39932	3.82308
-0.0043	-0.04844	0.39646	3.34281	-0.90214	-1.15495	0.3991	3.8206
-0.00432	-0.04844	0.3963	3.3446	-0.90229	-1.15524	0.40063	3.81936
-0.05053	-0.63141	0.36707	3.23813	-0.99855	-1.22392	0.36974	3.69489
-0.0514	-0.64442	0.36798	3.23772	-0.99855	-1.22399	0.36946	3.69213
-0.05153	-0.65504	0.36687	3.23566	-0.99922	-1.2245	0.36919	3.68964
-0.05153	-0.66287	0.36798	3.23481	-0.99938	-1.22517	0.37111	3.68728
-0.05153	-0.66791	0.36798	3.23556	-0.99953	-1.22614	0.37111	3.68513
-0.10149	-1.21222	0.3371	3.11539	-0.99931	-1.2275	0.33959	3.54375
-0.10234	-1.21879	0.33698	3.11333	-0.99931	-1.22745	0.33933	3.54134
-0.10252	-1.22297	0.3371	3.11072	-0.99931	-1.22764	0.33933	3.53843
-0.1027	-1.22606	0.33663	3.11127	-0.99935	-1.22855	0.33933	3.53652
-0.10149	-1.22808	0.3371	3.10861	-0.99937	-1.22906	0.33933	3.53529
-0.15216	-1.61283	0.30729	2.97913	-0.90246	-1.15662	0.30959	3.3758
-0.15221	-1.61863	0.30726	2.97595	-0.90233	-1.15499	0.30959	3.37291
-0.15221	-1.62254	0.30686	2.97535	-0.90233	-1.1538	0.30959	3.37114
-0.15221	-1.62597	0.30726	2.97243	-0.90233	-1.15319	0.3094	3.3698
-0.15221	-1.62841	0.30676	2.97293	-0.90233	-1.15219	0.30935	3.36814
-0.20145	-1.91809	0.27734	2.82238	-0.80227	-1.07634	0.28	3.19335
-0.20175	-1.92008	0.27697	2.81746	-0.80172	-1.07499	0.28	3.18852
-0.20205	-1.92233	0.27789	2.8152	-0.80118	-1.07362	0.28	3.18553
-0.20211	-1.92381	0.27717	2.81527	-0.80099	-1.07225	0.27924	3.18342
-0.20211	-1.9249	0.27789	2.81532	-0.80099	-1.07302	0.27908	3.18196
-0.25023	-2.14412	0.24733	2.64332	-0.70237	-0.98735	0.24943	2.97873
-0.25023	-2.14591	0.24705	2.63905	-0.70103	-0.98631	0.24924	2.97518
-0.25096	-2.14725	0.24684	2.63887	-0.70072	-0.98534	0.24904	2.97283
-0.25112	-2.149	0.24733	2.63842	-0.70041	-0.9839	0.24885	2.97093
-0.25128	-2.14914	0.24675	2.63689	-0.70009	-0.98346	0.25022	2.96994
-0.30069	-2.31999	0.21709	2.44317	-0.60017	-0.89108	0.21981	2.74495
-0.30069	-2.3222	0.21785	2.43934	-0.60017	-0.88995	0.21951	2.74026
-0.30069	-2.32313	0.21699	2.43874	-0.60017	-0.88947	0.21921	2.73664
-0.30069	-2.32492	0.21676	2.43802	-0.60017	-0.88915	0.22133	2.73361
-0.30097	-2.32592	0.21785	2.43542	-0.59949	-0.8891	0.22133	2.73191
-0.34772	-2.4579	0.18706	2.21391	-0.49928	-0.78334	0.18934	2.48072
-0.34941	-2.4601	0.18685	2.20962	-0.49898	-0.78244	0.18889	2.47462
-0.34974	-2.46261	0.18706	2.20872	-0.49898	-0.78232	0.18873	2.46986
-0.35008	-2.46414	0.18706	2.20762	-0.49898	-0.78242	0.18873	2.46683
-0.34772	-2.46559	0.18666	2.2076	-0.49898	-0.78142	0.18873	2.46524
-0.39894	-2.57971	0.15737	1.95618	-0.40032	-0.6653	0.15897	2.17849
-0.39894	-2.58006	0.15869	1.95198	-0.39988	-0.6646	0.15897	2.17409
-0.39894	-2.57957	0.15718	1.95022	-0.39945	-0.66337	0.15897	2.17025
-0.39946	-2.5801	0.15869	1.94958	-0.39902	-0.66272	0.15897	2.16721
-0.39957	-2.58052	0.15869	1.94919	-0.40228	-0.66269	0.15886	2.16568
-0.44843	-2.68279	0.12775	1.66416	-0.30057	-0.52738	0.12936	1.85333
-0.44897	-2.67769	0.12716	1.65887	-0.30057	-0.52606	0.12936	1.84739
-0.44897	-2.67515	0.12775	1.65249	-0.29988	-0.52476	0.12936	1.84259
-0.44897	-2.67423	0.12699	1.6548	-0.29973	-0.52423	0.12898	1.8391
-0.44897	-2.67471	0.12775	1.65333	-0.29957	-0.52424	0.1289	1.83624
-0.49701	-2.75341	0.09694	1.33347	-0.2004	-0.3778	0.09948	1.47641
-0.49811	-2.75436	0.09694	1.32764	-0.2004	-0.37647	0.09873	1.47065
-0.49834	-2.75504	0.09701	1.32425	-0.2004	-0.37514	0.09855	1.46653
-0.49858	-2.75575	0.09694	1.32236	-0.2004	-0.3738	0.09838	1.46342
-0.49701	-2.75446	0.09698	1.32147	-0.19973	-0.37231	0.0982	1.46154
-0.54788	-2.82336	0.08722	1.20798	-0.09995	-0.20219	0.08839	1.33262
-0.54788	-2.82407	0.08707	1.20412	-0.09954	-0.20086	0.08839	1.3294
-0.54788	-2.82513	0.08722	1.20235	-0.09954	-0.19968	0.08832	1.32765
-0.54788	-2.82584	0.08722	1.20214	-0.09954	-0.19927	0.0883	1.3262
-0.54816	-2.82602	0.08687	1.20146	-0.09954	-0.19927	0.08828	1.32515
-0.59776	-2.88157	0.07713	1.08303	-0.00105	-0.01187	0.07816	1.19638
-0.59819	-2.88261	0.07676	1.0804	-0.000688869	-0.01027	0.07813	1.19283
-0.59851	-2.88306	0.07713	1.0782	-0.000688869	-0.00892	0.07813	1.19065
-0.59851	-2.88391	0.0767	1.07687	-0.000688869	-0.00823	0.07813	1.18831
-0.59851	-2.88299	0.07713	1.07663	-0.000688869	-0.00749	0.07813	1.18701
-0.64719	-2.93106	0.06678	0.95424	0.10041	0.18517	0.06848	1.05794
-0.64719	-2.93225	0.06705	0.95199	0.10142	0.18611	0.06832	1.05422
-0.64719	-2.93295	0.06705	0.95151	0.10163	0.18794	0.06815	1.0516
-0.64825	-2.93391	0.06682	0.95132	0.10183	0.18903	0.06815	1.04978
-0.64846	-2.93486	0.06705	0.9505	0.10041	0.19045	0.06815	1.0494
-0.69782	-2.97737	0.05704	0.82449	0.20078	0.35755	0.05875	0.91718
-0.69812	-2.97817	0.05744	0.82081	0.20078	0.35863	0.05848	0.91365
-0.69812	-2.97904	0.05708	0.81967	0.20185	0.36001	0.05842	0.9108
-0.69812	-2.97914	0.05744	0.82026	0.20208	0.36035	0.05836	0.90835
-0.69812	-2.97913	0.05744	0.81885	0.2023	0.3616	0.05875	0.90631
-0.74643	-3.01771	0.04674	0.69157	0.30097	0.5053	0.0485	0.76906
-0.74819	-3.02087	0.04674	0.68769	0.30097	0.50794	0.0485	0.76557
-0.74855	-3.02205	0.04656	0.68572	0.30097	0.50964	0.0485	0.7627
-0.7489	-3.02311	0.04674	0.68492	0.30097	0.51004	0.04824	0.76028
-0.74643	-3.0238	0.0467	0.68351	0.30164	0.51011	0.04818	0.75853
-0.79862	-3.06235	0.03651	0.54836	0.40132	0.6407	0.03799	0.61671
-0.79885	-3.06313	0.03636	0.54484	0.40169	0.64149	0.03781	0.61313
-0.79885	-3.0629	0.03651	0.54335	0.40169	0.64147	0.03781	0.6099
-0.79885	-3.06301	0.03651	0.54111	0.40169	0.64245	0.03781	0.6068
-0.79885	-3.06327	0.03648	0.54041	0.40169	0.64268	0.03781	0.60508
-0.84843	-3.09436	0.02697	0.41401	0.50079	0.75967	0.0284	0.46584
-0.84879	-3.09432	0.02663	0.40895	0.50128	0.76107	0.02823	0.46267
-0.84914	-3.09618	0.02697	0.40727	0.50168	0.76164	0.02816	0.46006
-0.84677	-3.09671	0.02658	0.405	0.50168	0.76173	0.02816	0.45764
-0.84677	-3.0977	0.02697	0.40411	0.50168	0.76166	0.02816	0.4566
-0.89786	-3.12784	0.01683	0.27121	0.60128	0.86865	0.01899	0.31666
-0.89786	-3.12868	0.01752	0.26681	0.60156	0.86945	0.01831	0.31308
-0.89837	-3.13036	0.01671	0.26472	0.60184	0.86951	0.01818	0.30969
-0.89849	-3.13052	0.01649	0.26318	0.60213	0.8695	0.01805	0.30686
-0.89861	-3.13022	0.01752	0.2624	0.6011	0.86941	0.01899	0.30518
-0.94705	-3.16391	0.00717	0.12807	0.70042	0.96216	0.00837	0.16022
-0.94734	-3.1643	0.00676	0.12427	0.70042	0.96227	0.00829	0.1564
-0.94734	-3.16395	0.00717	0.122	0.70042	0.96251	0.00821	0.15314
-0.94734	-3.1639	0.00717	0.11998	0.70125	0.96241	0.00813	0.15074
-0.94734	-3.16357	0.00652	0.11926	0.70142	0.96233	0.00867	0.14919
-0.99437	-3.19084	-0.0022	-0.00393	0.8003	1.05046	-0.00055873	0.01464
-0.99464	-3.19211	-0.00245	-0.01007	0.8003	1.05051	-0.00125	0.0102
-0.9949	-3.19254	-0.00188	-0.01399	0.8003	1.0508	-0.00141	0.00717
-0.99315	-3.19295	-0.00287	-0.01613	0.8007	1.05145	-0.00158	0.00426
-0.99315	-3.19309	-0.00188	-0.0181	0.8008	1.05234	-0.00174	0.00202
-0.94782	-3.17107	-0.01264	-0.15426	0.89741	1.12909	-0.01164	-0.15355
-0.94782	-3.17022	-0.01264	-0.16009	0.89826	1.12946	-0.01176	-0.15773
-0.94763	-3.16926	-0.01312	-0.16299	0.89826	1.12972	-0.01189	-0.16119
-0.94758	-3.16815	-0.01264	-0.1646	0.89826	1.12992	-0.01191	-0.16375
-0.94753	-3.16776	-0.01334	-0.16675	0.89826	1.12997	-0.01191	-0.16544
-0.89813	-3.13569	-0.0227	-0.30141	1.00138	1.20284	-0.02154	-0.30885
-0.89796	-3.13646	-0.02243	-0.30496	1.0018	1.20332	-0.02166	-0.31247
-0.89796	-3.13748	-0.02243	-0.30711	1.00222	1.20337	-0.02179	-0.31531
-0.89796	-3.13861	-0.02325	-0.30869	1.00264	1.20418	-0.02179	-0.31772
-0.89796	-3.13887	-0.02243	-0.30956	0.99958	1.20484	-0.02179	-0.31958
-0.8497	-3.10731	-0.03275	-0.44419	1.00324	1.20515	-0.03192	-0.46459
-0.84846	-3.10597	-0.03312	-0.44813	1.00324	1.2046	-0.03209	-0.46824
-0.8482	-3.10568	-0.03275	-0.44957	1.00329	1.20423	-0.03225	-0.47144
-0.84794	-3.10492	-0.03275	-0.45083	1.00331	1.20541	-0.03225	-0.47358
-0.8497	-3.10451	-0.03322	-0.45229	1.00332	1.20558	-0.03225	-0.47497
-0.79819	-3.06569	-0.0422	-0.57815			-0.04154	-0.61707
-0.79819	-3.06575	-0.04279	-0.58221			-0.04168	-0.61993
-0.79819	-3.06723	-0.0422	-0.58527			-0.04181	-0.62253
-0.79776	-3.06737	-0.04279	-0.58689			-0.04195	-0.62515
-0.79766	-3.06753	-0.0422	-0.58896			-0.04092	-0.6269
-0.74805	-3.02932	-0.05308	-0.72183			-0.05167	-0.77303
-0.7476	-3.02958	-0.0528	-0.72595			-0.05227	-0.77653
-0.74715	-3.02882	-0.0528	-0.72916			-0.05242	-0.77896
-0.74704	-3.02712	-0.05337	-0.72962			-0.05257	-0.7807
-0.74704	-3.02853	-0.0528	-0.73067			-0.05272	-0.78293
-0.69798	-2.98873	-0.0631	-0.8576			-0.06227	-0.92338
-0.69798	-2.9868	-0.06254	-0.86195			-0.06227	-0.92614
-0.69798	-2.98586	-0.06332	-0.86383			-0.0625	-0.92857
-0.69745	-2.98595	-0.06254	-0.86474			-0.06256	-0.93083
-0.69734	-2.98556	-0.06254	-0.86499			-0.06262	-0.93263
-0.64784	-2.94408	-0.07306	-0.98665			-0.07236	-1.06506
-0.64742	-2.94425	-0.07306	-0.99065			-0.07236	-1.06869
-0.64701	-2.9432	-0.07326	-0.99015			-0.07236	-1.07172
-0.64699	-2.94212	-0.07306	-0.99379			-0.07236	-1.07392
-0.64699	-2.94118	-0.07347	-0.995			-0.07274	-1.0752
-0.59762	-2.88902	-0.08306	-1.11129			-0.08219	-1.20623
-0.59762	-2.88945	-0.08332	-1.11327			-0.08234	-1.20905
-0.59762	-2.88955	-0.08349	-1.11728			-0.08234	-1.21111
-0.59679	-2.88885	-0.08306	-1.11751			-0.08234	-1.21278
-0.59661	-2.88719	-0.08331	-1.11854			-0.08234	-1.21384
-0.54743	-2.82872	-0.09304	-1.23423			-0.09259	-1.34269
-0.54697	-2.82886	-0.09314	-1.23826			-0.09271	-1.3456
-0.5467	-2.82758	-0.09304	-1.23864			-0.09284	-1.34766
-0.5467	-2.82566	-0.09334	-1.24019			-0.09284	-1.34924
-0.5467	-2.82519	-0.09341	-1.24224			-0.09284	-1.35016
-0.49749	-2.75563	-0.1032	-1.34776			-0.10182	-1.47215
-0.49749	-2.75463	-0.1034	-1.3528			-0.10248	-1.4753
-0.49676	-2.75332	-0.10294	-1.35426			-0.10263	-1.47791
-0.49659	-2.75207	-0.10331	-1.3551			-0.10278	-1.47991
-0.49641	-2.75202	-0.10294	-1.35292			-0.10182	-1.48091
-0.4476	-2.67485	-0.10331	-1.35638			-0.10301	-1.48776
-0.44695	-2.6741	-0.10321	-1.35802			-0.10301	-1.48798
-0.44688	-2.67425	-0.10342	-1.35627			-0.10287	-1.48804
-0.44688	-2.67341	-0.10348	-1.35647			-0.10284	-1.48809
-0.44688	-2.6729	-0.10321	-1.35759			-0.1028	-1.48892
-0.39859	-2.58093	-0.13242	-1.67097			-0.1319	-1.83352
-0.39751	-2.57926	-0.13274	-1.67686			-0.13207	-1.83897
-0.39728	-2.57822	-0.13242	-1.67919			-0.13224	-1.84306
-0.39705	-2.57763	-0.13314	-1.68132			-0.1324	-1.84652
-0.39859	-2.57592	-0.13332	-1.68089			-0.13119	-1.84915
-0.34762	-2.46508	-0.16203	-1.95579			-0.1616	-2.17065
-0.34762	-2.46494	-0.16004	-1.96174			-0.16198	-2.17345
-0.34762	-2.46527	-0.16195	-1.96571			-0.16207	-2.17599
-0.34762	-2.46459	-0.16004	-1.96778			-0.16207	-2.17858
-0.34722	-2.46188	-0.16004	-1.96769			-0.16207	-2.1796
-0.29891	-2.32716	-0.19137	-2.21239			-0.19137	-2.45839
-0.29862	-2.3248	-0.19169	-2.2162			-0.19137	-2.46396
-0.29833	-2.32228	-0.19096	-2.22081			-0.19137	-2.46872
-0.29804	-2.32012	-0.1917	-2.21867			-0.19137	-2.47205
-0.30029	-2.31884	-0.19096	-2.22087			-0.19184	-2.47404
-0.2484	-2.14786	-0.22135	-2.43504			-0.22111	-2.72965
-0.2484	-2.14496	-0.2216	-2.43986			-0.22111	-2.73334
-0.2484	-2.1424	-0.2218	-2.43934			-0.22142	-2.73551
-0.24814	-2.13953	-0.22135	-2.4422			-0.22149	-2.7375
-0.24808	-2.1377	-0.22158	-2.44397			-0.22157	-2.73838
-0.19957	-1.9211	-0.25085	-2.63439			-0.24988	-2.96084
-0.19922	-1.91669	-0.25008	-2.63826			-0.25072	-2.96461
-0.19888	-1.91276	-0.25092	-2.64018			-0.25092	-2.96802
-0.20123	-1.91017	-0.25114	-2.64244			-0.25113	-2.97116
-0.20123	-1.90922	-0.25008	-2.64283			-0.25133	-2.97358
-0.14955	-1.62276	-0.2806	-2.80863			-0.28047	-3.17671
-0.14955	-1.61726	-0.28085	-2.81298			-0.28076	-3.17874
-0.14955	-1.61312	-0.2806	-2.81501			-0.28105	-3.1811
-0.149	-1.60949	-0.28081	-2.81243			-0.28112	-3.18326
-0.14886	-1.60719	-0.28087	-2.81454			-0.28112	-3.18448
-0.09983	-1.21267	-0.31036	-2.96399			-0.31046	-3.33893
-0.09944	-1.20539	-0.30869	-2.96408			-0.31071	-3.35103
-0.09905	-1.19999	-0.31015	-2.96561			-0.31071	-3.35939
-0.09887	-1.19574	-0.30869	-2.96654			-0.31071	-3.36369
-0.09887	-1.19281	-0.30869	-2.96754			-0.31071	-3.36625
-0.04949	-0.66179	-0.33963	-3.09891			-0.34037	-3.5279
-0.04949	-0.65399	-0.34009	-3.10236			-0.34037	-3.52753
-0.04889	-0.64846	-0.33908	-3.10491			-0.34037	-3.52855
-0.04875	-0.64423	-0.3399	-3.1033			-0.34037	-3.52982
-0.04862	-0.641	-0.33908	-3.10338			-0.34071	-3.53082
0.00321	0.0652	-0.36917	-3.2249			-0.36927	-3.67504
0.00321	0.06465	-0.36917	-3.22517			-0.36927	-3.67716
0.00321	0.06422	-0.36914	-3.22557			-0.36999	-3.67889
0.00321	0.06422	-0.36917	-3.22855			-0.37014	-3.67975
0.00321	0.06423	-0.3692	-3.22802			-0.37029	-3.68129
0.04955	0.6625	-0.39845	-3.3371			-0.39794	-3.80111
0.05011	0.67262	-0.39806	-3.34069			-0.39895	-3.80518
0.05054	0.68016	-0.39806	-3.33901			-0.39916	-3.80901
0.05054	0.68568	-0.39878	-3.34124			-0.39938	-3.81213
0.05054	0.6902	-0.39806	-3.34117			-0.39794	-3.81305
0.1005	1.22563	-0.4284	-3.43602			-0.42878	-3.93603
0.10139	1.23212	-0.42849	-3.43629			-0.42901	-3.93681
0.10161	1.23663	-0.42855	-3.43913			-0.42925	-3.93763
0.10183	1.24006	-0.4284	-3.43181			-0.42925	-3.9376
0.10205	1.24233	-0.42896	-3.43289			-0.42925	-3.93729
0.15097	1.62918	-0.45782	-3.52276			-0.45906	-4.04361
0.15138	1.63441	-0.45683	-3.52477			-0.45918	-4.04608
0.15138	1.63884	-0.45817	-3.52269			-0.45918	-4.04738
0.15138	1.64143	-0.45851	-3.52216			-0.45918	-4.04695
0.15138	1.64395	-0.45683	-3.52262			-0.45918	-4.04614
0.19982	1.93176	-0.4875	-3.60477			-0.48856	-4.13951
0.20066	1.93587	-0.48794	-3.60349			-0.48856	-4.1405
0.20085	1.93907	-0.4875	-3.60305			-0.48856	-4.14121
0.20103	1.94105	-0.48798	-3.60364			-0.48919	-4.14284
0.20122	1.9432	-0.4881	-3.60551			-0.48932	-4.14207
0.25028	2.15783	-0.51746	-3.66992			-0.51758	-4.23154
0.25067	2.16168	-0.51746	-3.6652			-0.51758	-4.23329
0.25067	2.16372	-0.51802	-3.67112			-0.51859	-4.23394
0.25067	2.16666	-0.51746	-3.67377			-0.5188	-4.23328
0.25067	2.16935	-0.51789	-3.66711			-0.51902	-4.23331
0.30001	2.33699	-0.54726	-3.74521			-0.54817	-4.31001
0.30029	2.33964	-0.54671	-3.74551			-0.54842	-4.31124
0.30057	2.34115	-0.54671	-3.74695			-0.54867	-4.31385
0.30084	2.34252	-0.54762	-3.7465			-0.54892	-4.31689
0.29876	2.34366	-0.54671	-3.7418			-0.54709	-4.3181
0.34957	2.4784	-0.5769	-3.79534			-0.57824	-4.38264
0.34957	2.4805	-0.57739	-3.80257			-0.57868	-4.38161
0.34957	2.48191	-0.57773	-3.80308			-0.57891	-4.38025
0.34957	2.48229	-0.5769	-3.79765			-0.57891	-4.38241
0.35044	2.48261	-0.57725	-3.80235			-0.57891	-4.38402
0.39942	2.59051	-0.60652	-3.85827			-0.60843	-4.4528
0.39983	2.59306	-0.60584	-3.85996			-0.60843	-4.45311
0.39998	2.59377	-0.60688	-3.85827			-0.60843	-4.45304
0.39998	2.59472	-0.60715	-3.85613			-0.60843	-4.45326
0.39998	2.59598	-0.60584	-3.85733			-0.60884	-4.45386
0.44812	2.65532	-0.63693	-3.91066			-0.63784	-4.51551
0.44915	2.67355	-0.63705	-3.91076			-0.63784	-4.5161
0.44937	2.68228	-0.63693	-3.91129			-0.63853	-4.51709
0.4496	2.68614	-0.63742	-3.91073			-0.6387	-4.51701
0.44812	2.68808	-0.63755	-3.91127			-0.63886	-4.51713
0.49894	2.7657	-0.66762	-3.95123			-0.66771	-4.56665
0.49894	2.76656	-0.66772	-3.95255			-0.66865	-4.56699
0.49894	2.76771	-0.66794	-3.95382			-0.66883	-4.5683
0.49894	2.76721	-0.66772	-3.95316			-0.66901	-4.57003
0.49894	2.76625	-0.66759	-3.95227			-0.66771	-4.57174
0.54832	2.8344	-0.69723	-3.99986			-0.69888	-4.62605
0.54866	2.83595	-0.69752	-4.00014			-0.69933	-4.62691
0.549	2.83746	-0.69683	-3.99983			-0.69953	-4.62679
0.54675	2.8376	-0.6975	-3.99568			-0.69953	-4.62753
0.54675	2.83694	-0.69683	-3.99626			-0.69953	-4.62877
0.5986	2.89486	-0.72706	-4.04157			-0.72905	-4.6917
0.5986	2.8955	-0.72724	-4.03947			-0.72905	-4.68747
0.5986	2.89691	-0.72739	-4.03862			-0.72905	-4.68638
0.59906	2.89813	-0.72706	-4.03645			-0.72905	-4.68591
0.59915	2.89872	-0.72776	-4.03527			-0.72958	-4.68446
0.6476	2.95155	-0.75741	-4.07286			-0.75898	-4.72199
0.64826	2.95344	-0.75638	-4.06652			-0.75898	-4.72179
0.64869	2.95409	-0.75638	-4.06928			-0.75962	-4.72142
0.64869	2.95343	-0.75753	-4.06715			-0.75976	-4.72202
0.64869	2.95294	-0.75638	-4.06993			-0.7599	-4.72243
0.69768	2.99725	-0.78777	-4.10791			-0.78822	-4.76715
0.69833	2.99731	-0.78799	-4.10381			-0.78822	-4.76802
0.69849	2.99777	-0.78777	-4.11085			-0.78822	-4.76851
0.69864	2.99881	-0.78777	-4.10942			-0.78951	-4.76947
0.69879	2.99904	-0.78817	-4.10737			-0.78977	-4.7698
0.74737	3.03902	-0.81786	-4.13877			-0.81843	-4.80869
0.74749	3.03871	-0.8166	-4.13924			-0.8196	-4.80917
0.74749	3.03908	-0.81776	-4.14015			-0.81984	-4.81032
0.74749	3.03999	-0.81804	-4.13903			-0.82009	-4.81191
0.74749	3.04096	-0.8166	-4.1255			-0.81843	-4.8132
0.795	3.08275	-0.84755	-4.17037			-0.84929	-4.83985
0.79677	3.08265	-0.8479	-4.17157			-0.84962	-4.84017
0.79713	3.08269	-0.84755	-4.16994			-0.84982	-4.84022
0.7975	3.08396	-0.84803	-4.16896			-0.84982	-4.84037
0.795	3.08481	-0.84816	-4.17114			-0.84982	-4.8409
0.84624	3.12086	-0.87716	-4.19701			-0.87966	-4.88154
0.84624	3.12185	-0.87721	-4.19806			-0.87966	-4.88175
0.84624	3.12224	-0.8778	-4.19802			-0.87966	-4.88168
0.84672	3.12248	-0.87721	-4.19547			-0.87966	-4.88226
0.84682	3.12237	-0.87777	-4.18864			-0.87973	-4.88406
0.89386	3.15414	-0.90687	-4.22202			-0.90834	-4.91783
0.89436	3.15542	-0.90731	-4.22437			-0.90834	-4.91833
0.89486	3.15503	-0.90623	-4.22776			-0.90903	-4.91972
0.89499	3.15546	-0.90717	-4.22603			-0.90918	-4.92112
0.89499	3.15615	-0.90623	-4.22706			-0.90934	-4.92218
0.94142	3.18331	-0.93587	-4.25689			-0.93808	-4.95073
0.94142	3.1829	-0.93617	-4.25468			-0.93835	-4.95229
0.94242	3.18358	-0.93637	-4.25835			-0.93862	-4.953
0.94262	3.18436	-0.93587	-4.25658			-0.93889	-4.95352
0.94283	3.18528	-0.93638	-4.25512			-0.93686	-4.9539
0.99689	3.21183	-0.96501	-4.27709			-0.96726	-4.98236
0.99689	3.21284	-0.96366	-4.27405			-0.96771	-4.98322
0.99689	3.21302	-0.96503	-4.2749			-0.96783	-4.98354
0.99689	3.21301	-0.96537	-4.27628			-0.96783	-4.98401
0.99745	3.21482	-0.96366	-4.27774			-0.96783	-4.98491

## Sheet: Figure 1b
C1 N2		C2 N2		C1 air		C2 air
1.00223	3.24213	0.99927	4.10636	0.99037	0.83206	0.99888	3.51636
0.96396	3.21446	0.99927	4.10499	0.99037	0.83269	0.99911	3.51728
0.92332	3.19364	0.99927	4.09942	0.99014	0.83364	0.99911	3.51857
0.88269	3.17151	1.00007	4.09352	0.99009	0.83431	0.99911	3.51925
0.84205	3.14627	1.00025	4.08657	0.99003	0.83523	0.99911	3.51888
0.80142	3.12103	0.96332	4.05885	0.89078	0.77881	0.96264	3.49868
0.76078	3.09096	0.96298	4.05967	0.89078	0.77853	0.96264	3.49828
0.72015	3.06346	0.9629	4.05971	0.89078	0.7779	0.96264	3.49758
0.67951	3.02897	0.96282	4.05936	0.89078	0.77768	0.96264	3.49742
0.63888	2.99702	0.96275	4.06058	0.89052	0.77714	0.96237	3.4962
0.59824	2.96339	0.93462	4.06795	0.79367	0.7174	0.93425	3.47143
0.55761	2.91543	0.9344	4.06727	0.79303	0.71661	0.93425	3.47273
0.51697	2.86746	0.93418	4.06591	0.79261	0.71589	0.93392	3.47378
0.47634	2.80812	0.93412	4.06436	0.79261	0.71572	0.93385	3.4763
0.43571	2.74583	0.93412	4.0643	0.79261	0.71586	0.93378	3.47703
0.39877	2.68469	0.90534	4.03573	0.69601	0.65209	0.90569	3.44568
0.35814	2.59631	0.90526	4.03356	0.69498	0.6513	0.90498	3.44295
0.31751	2.50793	0.90526	4.03097	0.69476	0.65107	0.90484	3.44107
0.27689	2.38324	0.90526	4.02768	0.69454	0.65067	0.9047	3.44099
0.23627	2.24042	0.90526	4.02625	0.69601	0.64987	0.90569	3.44101
0.19566	2.08413	0.87684	4.01516	0.59547	0.58152	0.87646	3.42755
0.15507	1.8256	0.87684	4.01736	0.59547	0.58072	0.87631	3.42922
0.11449	1.56707	0.87684	4.01876	0.59547	0.57993	0.87615	3.42977
0.07406	1.09615	0.8764	4.0183	0.59495	0.57932	0.87717	3.43045
0.03369	0.51995	0.87631	4.01651	0.59483	0.5792	0.87717	3.43134
-0.00663	-0.07538	0.84793	3.99273	0.49642	0.50689	0.84679	3.41818
-0.04699	-0.66778	0.84793	3.99329	0.49581	0.50573	0.84654	3.41922
-0.08734	-1.26019	0.84717	3.99444	0.49581	0.50426	0.84652	3.41973
-0.12536	-1.62828	0.84701	3.99513	0.49581	0.50347	0.84652	3.42039
-0.16594	-1.89037	0.84684	3.99373	0.49581	0.50265	0.84652	3.421
-0.20653	-2.14067	0.81781	3.96408	0.39741	0.42133	0.81726	3.38016
-0.24715	-2.28766	0.8177	3.96708	0.397	0.42073	0.81716	3.37783
-0.28777	-2.43466	0.81759	3.96956	0.39659	0.42011	0.81716	3.37516
-0.32839	-2.54496	0.81748	3.97458	0.39932	0.41942	0.81716	3.37353
-0.36902	-2.64003	0.8183	3.97932	0.39932	0.41875	0.81716	3.37363
-0.40965	-2.72738	0.78865	3.90861	0.2983	0.32928	0.78807	3.35045
-0.45028	-2.79095	0.78843	3.90739	0.29689	0.32852	0.78807	3.35207
-0.49092	-2.85451	0.7882	3.90475	0.29661	0.32813	0.78766	3.35424
-0.53155	-2.91077	0.78813	3.90191	0.29633	0.32808	0.78756	3.35642
-0.57218	-2.95745	0.78813	3.90251	0.2983	0.32797	0.78746	3.35753
-0.61282	-3.00174	0.75854	3.9036	0.19819	0.23039	0.75832	3.32752
-0.65345	-3.03834	0.75837	3.90306	0.19819	0.2292	0.75821	3.32797
-0.69409	-3.07494	0.75837	3.89931	0.19819	0.22844	0.7581	3.32816
-0.73267	-3.10396	0.75837	3.8936	0.1974	0.22784	0.758	3.32794
-0.77331	-3.12995	0.75837	3.88674	0.19723	0.22711	0.75875	3.32728
-0.81394	-3.15869	0.72896	3.8744	0.09734	0.11909	0.72834	3.29749
-0.85458	-3.18037	0.72896	3.87271	0.09734	0.11864	0.72804	3.29785
-0.89521	-3.20206	0.72896	3.87133	0.09734	0.11863	0.72803	3.29881
-0.93585	-3.22633	0.72896	3.87043	0.09734	0.11826	0.72803	3.29995
-0.97648	-3.24363	0.72861	3.86953	0.09701	0.11793	0.72803	3.3008
-0.98086	-3.23884	0.69911	3.81837	0.000160402	0.00166	0.69861	3.2615
-0.94023	-3.21531	0.69911	3.82175	-0.000714629	0.000485957	0.69861	3.26091
-0.89959	-3.18742	0.69911	3.82668	-0.000726879	-0.000561691	0.69861	3.26122
-0.85896	-3.1667	0.69876	3.83053	-0.000726879	-0.00172	0.69846	3.26158
-0.81832	-3.14598	0.69868	3.83211	-0.000726879	-0.00172	0.69843	3.26139
-0.77769	-3.11782	0.66957	3.79013	-0.10113	-0.12557	0.66922	3.22339
-0.73705	-3.08567	0.66957	3.78752	-0.10198	-0.12604	0.66922	3.22372
-0.69642	-3.05612	0.66924	3.78449	-0.10217	-0.12688	0.6687	3.22351
-0.65578	-3.02072	0.66917	3.78133	-0.10236	-0.12729	0.66858	3.22364
-0.61515	-2.98533	0.66909	3.78315	-0.10255	-0.1273	0.66846	3.22295
-0.57451	-2.93998	0.6402	3.75865	-0.20016	-0.23388	0.6399	3.18852
-0.53388	-2.89554	0.6402	3.75768	-0.20016	-0.23506	0.63906	3.18908
-0.49325	-2.84659	0.63946	3.75802	-0.20093	-0.23589	0.63887	3.19002
-0.45261	-2.78645	0.63931	3.75894	-0.20111	-0.23676	0.63867	3.19026
-0.41198	-2.7263	0.63916	3.76075	-0.2013	-0.23709	0.63848	3.18858
-0.37135	-2.64187	0.61018	3.69014	-0.29877	-0.33313	0.60923	3.1415
-0.33072	-2.5519	0.60919	3.68819	-0.29877	-0.3343	0.60898	3.14087
-0.29009	-2.44466	0.60899	3.68716	-0.29877	-0.33459	0.60873	3.14014
-0.24947	-2.3025	0.60878	3.68689	-0.29877	-0.33496	0.6104	3.13898
-0.20885	-2.16034	0.61018	3.68839	-0.29932	-0.3348	0.6104	3.13767
-0.16827	-1.9157	0.5798	3.66843	-0.39666	-0.42451	0.57922	3.10023
-0.12769	-1.65044	0.57956	3.66566	-0.39748	-0.42535	0.57892	3.09973
-0.09234	-1.30993	0.57931	3.65939	-0.39784	-0.42583	0.57869	3.09839
-0.05196	-0.74936	0.57906	3.65306	-0.39784	-0.42578	0.57869	3.0973
-0.01158	-0.18878	0.57998	3.64856	-0.39784	-0.42627	0.57869	3.0966
0.02876	0.41083	0.54942	3.58349	-0.49595	-0.50898	0.54886	3.04884
0.06912	0.99249	0.54908	3.58243	-0.49637	-0.50997	0.54886	3.04722
0.10951	1.51752	0.54874	3.5812	-0.4968	-0.51103	0.54886	3.04561
0.15009	1.77862	0.54866	3.58119	-0.49692	-0.5115	0.54886	3.04399
0.19067	2.03972	0.54866	3.5825	-0.49692	-0.51207	0.54849	3.04236
0.23128	2.22052	0.51945	3.51464	-0.59451	-0.58596	0.51907	2.99095
0.2719	2.3691	0.51902	3.51425	-0.5954	-0.58702	0.51907	2.9892
0.31252	2.50541	0.51899	3.51399	-0.59561	-0.58748	0.51907	2.98928
0.35315	2.596	0.51899	3.51475	-0.59582	-0.58807	0.51858	2.98859
0.39378	2.68659	0.51899	3.51564	-0.59603	-0.58824	0.51848	2.98715
0.43441	2.75505	0.48921	3.45974	-0.69508	-0.65561	0.48952	2.9284
0.47505	2.81781	0.48906	3.45981	-0.69508	-0.6564	0.48952	2.92675
0.51568	2.87695	0.48906	3.45862	-0.69586	-0.65649	0.489	2.92506
0.55631	2.92269	0.48906	3.45731	-0.69605	-0.65684	0.48888	2.92432
0.59695	2.96843	0.48906	3.45613	-0.69623	-0.65703	0.48876	2.92457
0.63758	3.00847	0.45948	3.40315	-0.79588	-0.71982	0.45902	2.85914
0.67822	3.04099	0.45948	3.40054	-0.79588	-0.72011	0.4588	2.8578
0.71885	3.07767	0.45898	3.39792	-0.79588	-0.72082	0.45858	2.85712
0.75949	3.10397	0.45886	3.39488	-0.79588	-0.7215	0.45836	2.85752
0.80012	3.1309	0.45873	3.39517	-0.79632	-0.7218	0.46003	2.85808
0.84076	3.15338	0.42997	3.30545	-0.89446	-0.77997	0.42948	2.77967
0.88139	3.1756	0.42927	3.30346	-0.89527	-0.78121	0.42921	2.77831
0.92203	3.19541	0.4291	3.30258	-0.89558	-0.78218	0.42895	2.778
0.96267	3.21829	0.42893	3.30212	-0.89558	-0.78302	0.42889	2.77817
1.00329	3.22886	0.42876	3.30073	-0.89558	-0.78219	0.42889	2.7802
--	--	0.40048	3.20844	-0.99107	-0.83665	0.39925	2.69692
--	--	0.39949	3.20729	-0.99156	-0.83714	0.39883	2.69487
--	--	0.39929	3.20719	-0.99205	-0.83715	0.39867	2.6939
--	--	0.39908	3.20549	-0.98886	-0.83796	0.39867	2.69362
--	--	0.40048	3.20386	-0.98886	-0.83842	0.39867	2.69349
--	--	0.36983	3.12145	-0.99248	-0.83863	0.36944	2.6116
--	--	0.36954	3.11854	-0.99252	-0.83883	0.36917	2.60973
--	--	0.36925	3.11519	-0.99253	-0.83882	0.36917	2.60735
--	--	0.37119	3.11297	-0.99254	-0.83881	0.36917	2.60557
--	--	0.37119	3.11123	-0.99255	-0.83888	0.36917	2.60353
--	--	0.33995	3.01239	-0.89573	-0.78358	0.33951	2.50444
--	--	0.33963	3.00908	-0.89573	-0.78348	0.33951	2.50377
--	--	0.33931	3.00773	-0.89573	-0.78329	0.33951	2.50222
--	--	0.33931	3.00743	-0.89553	-0.78301	0.33951	2.50077
--	--	0.33931	3.00774	-0.89548	-0.78242	0.33889	2.49933
--	--	0.30994	2.87961	-0.79573	-0.72199	0.30951	2.39377
--	--	0.30951	2.87635	-0.79573	-0.72203	0.30951	2.39164
--	--	0.30944	2.87538	-0.79573	-0.72199	0.30951	2.39018
--	--	0.30944	2.87442	-0.79573	-0.72195	0.30912	2.38912
--	--	0.30944	2.87275	-0.79543	-0.72138	0.30902	2.38826
--	--	0.27952	2.73185	-0.69645	-0.65559	0.27982	2.26023
--	--	0.27952	2.73135	-0.69588	-0.65557	0.27919	2.25707
--	--	0.27952	2.73137	-0.69554	-0.65488	0.27904	2.25498
--	--	0.27915	2.73163	-0.69554	-0.65479	0.27888	2.25399
--	--	0.27906	2.73108	-0.69554	-0.65479	0.27873	2.25356
--	--	0.24936	2.59144	-0.5975	-0.58653	0.2502	2.11187
--	--	0.24936	2.58709	-0.59594	-0.58588	0.24923	2.10955
--	--	0.24936	2.58385	-0.59561	-0.58562	0.24903	2.10717
--	--	0.24904	2.58194	-0.59528	-0.585	0.24884	2.10526
--	--	0.24898	2.58073	-0.5975	-0.58486	0.2502	2.10387
--	--	0.22009	2.4133	-0.49665	-0.50877	0.2194	1.94717
--	--	0.21916	2.41047	-0.49665	-0.5088	0.2191	1.94381
--	--	0.21897	2.40661	-0.49573	-0.50774	0.21897	1.94125
--	--	0.21878	2.40319	-0.49554	-0.50707	0.21897	1.93955
--	--	0.22009	2.39936	-0.49535	-0.50661	0.21897	1.93774
--	--	0.18953	2.21766	-0.39667	-0.42807	0.18911	1.76145
--	--	0.18924	2.21413	-0.39667	-0.42675	0.18887	1.75808
--	--	0.18895	2.2108	-0.39667	-0.42523	0.18887	1.75534
--	--	0.19083	2.20722	-0.39667	-0.42463	0.18887	1.75302
--	--	0.19083	2.204	-0.39645	-0.42451	0.18887	1.75132
--	--	0.15921	1.97674	-0.29857	-0.33446	0.16026	1.56827
--	--	0.1589	1.97331	-0.29781	-0.33296	0.15949	1.56172
--	--	0.15887	1.97125	-0.29738	-0.33274	0.15912	1.55764
--	--	0.15887	1.97006	-0.29738	-0.33277	0.15912	1.5534
--	--	0.15887	1.96915	-0.29738	-0.33276	0.15912	1.55002
--	--	0.12922	1.71429	-0.19948	-0.23434	0.12917	1.31776
--	--	0.12904	1.70888	-0.19912	-0.23317	0.12878	1.31356
--	--	0.12904	1.70546	-0.19876	-0.23192	0.12878	1.31034
--	--	0.12904	1.70263	-0.1984	-0.23137	0.12878	1.30797
--	--	0.12904	1.69996	-0.19967	-0.23137	0.12878	1.30567
--	--	0.099	1.39822	-0.09987	-0.12392	0.09883	1.05415
--	--	0.099	1.39256	-0.09987	-0.12308	0.09883	1.0508
--	--	0.099	1.38963	-0.09913	-0.12233	0.09883	1.04764
--	--	0.09866	1.38844	-0.09896	-0.12155	0.09859	1.04486
--	--	0.09859	1.38784	-0.09879	-0.12136	0.09853	1.04309
--	--	0.08846	1.2783	-0.00235	-0.00712	0.08864	0.95298
--	--	0.08836	1.27544	-0.00121	-0.00551	0.08853	0.9511
--	--	0.08836	1.27275	-0.00105	-0.00419	0.08853	0.95009
--	--	0.08836	1.27046	-0.00105	-0.00301	0.08853	0.94929
--	--	0.08836	1.26908	-0.00105	-0.00286	0.08853	0.94838
--	--	0.07834	1.1515	0.10021	0.12217	0.07845	0.85301
--	--	0.07822	1.14878	0.10021	0.12255	0.07832	0.85133
--	--	0.07816	1.1469	0.1009	0.12303	0.07818	0.85083
--	--	0.07816	1.14511	0.10104	0.12304	0.07911	0.8498
--	--	0.07816	1.14405	0.10118	0.12304	0.07911	0.8489
--	--	0.06841	1.02515	0.19995	0.23006	0.06883	0.75645
--	--	0.06833	1.02308	0.19995	0.23087	0.06883	0.75421
--	--	0.06824	1.02147	0.19995	0.23132	0.06825	0.75282
--	--	0.06821	1.01987	0.19995	0.23168	0.06813	0.75165
--	--	0.06821	1.01854	0.2008	0.23259	0.06801	0.75074
--	--	0.05836	0.89363	0.29933	0.33065	0.05861	0.65782
--	--	0.05827	0.89107	0.29944	0.33063	0.05861	0.65557
--	--	0.05817	0.88966	0.29944	0.33063	0.05861	0.65395
--	--	0.05807	0.88928	0.29944	0.33062	0.05861	0.65276
--	--	0.05877	0.88827	0.29944	0.33063	0.0583	0.65185
--	--	0.0487	0.75891	0.3992	0.42456	0.04844	0.55439
--	--	0.0487	0.7552	0.3992	0.42368	0.04825	0.55162
--	--	0.04839	0.75217	0.49639	0.50402	0.04819	0.54957
--	--	0.04832	0.75014	0.49788	0.50521	0.04819	0.54852
--	--	0.04825	0.7487	0.49821	0.50555	0.04819	0.54787
--	--	0.03789	0.61066	0.49854	0.5061	0.03828	0.44704
--	--	0.03789	0.60695	0.49888	0.50616	0.03819	0.44375
--	--	0.03789	0.60385	0.59736	0.58006	0.0381	0.44138
--	--	0.03789	0.60186	0.59736	0.5812	0.038	0.43975
--	--	0.0377	0.59967	0.59736	0.58156	0.03869	0.43799
--	--	0.02837	0.45989	0.59782	0.58196	0.02857	0.33887
--	--	0.02828	0.4568	0.59793	0.58286	0.02857	0.33692
--	--	0.02828	0.45422	0.69653	0.65046	0.02828	0.33529
--	--	0.02828	0.45251	0.6972	0.65067	0.02823	0.33358
--	--	0.02828	0.45075	0.6972	0.65068	0.02817	0.33257
--	--	0.01848	0.31117	0.6972	0.65114	0.0184	0.23584
--	--	0.01837	0.30703	0.6972	0.65135	0.0184	0.23294
--	--	0.01826	0.30349	0.79533	0.71667	0.0184	0.23086
--	--	0.01904	0.30056	0.79585	0.7168	0.01797	0.22922
--	--	0.01904	0.29821	0.79637	0.71612	0.01787	0.22763
--	--	0.00862	0.1522	0.79466	0.7163	0.00829	0.127
--	--	0.00849	0.14917	0.79466	0.71629	0.00829	0.12457
--	--	0.00836	0.14644	0.89223	0.77637	0.00829	0.12282
--	--	0.00927	0.14377	0.89223	0.77681	0.00812	0.1212
--	--	0.00927	0.14256	0.89344	0.77742	0.00808	0.11948
--	--	-0.00101	0.00548	0.8937	0.7782	-0.0011	0.02467
--	--	-0.00111	0.0015	0.89395	0.77827	-0.0011	0.02251
--	--	-0.0012	-0.00138	0.99436	0.83304	-0.0011	0.02028
--	--	-0.0013	-0.00385	0.99436	0.83359	-0.0011	0.01833
--	--	-0.000628855	-0.00647	0.99436	0.83341	-0.0014	0.01719
--	--	-0.01167	-0.16187	0.99552	0.83309	-0.01138	-0.09176
--	--	-0.01174	-0.16541	0.99579	0.83309	-0.01191	-0.09378
--	--	-0.01174	-0.16851	0.99609	0.83517	-0.01204	-0.09566
--	--	-0.01174	-0.17111	0.99609	0.835	-0.01216	-0.09789
--	--	-0.01174	-0.1734	0.99609	0.83487	-0.01228	-0.09887
--	--	-0.02194	-0.31587	0.99609	0.83449	-0.02146	-0.19805
--	--	-0.022	-0.31869	--	--	-0.02146	-0.20059
--	--	-0.022	-0.32136	--	--	-0.02194	-0.20272
--	--	-0.022	-0.3242	--	--	-0.02203	-0.20437
--	--	-0.022	-0.3267	--	--	-0.02213	-0.2062
--	--	-0.03199	-0.47078	--	--	-0.0316	-0.30742
--	--	-0.03204	-0.4744	--	--	-0.0316	-0.31028
--	--	-0.03204	-0.4777	--	--	-0.0319	-0.3127
--	--	-0.03204	-0.48021	--	--	-0.03196	-0.31415
--	--	-0.03204	-0.48194	--	--	-0.03202	-0.3157
--	--	-0.04167	-0.62075	--	--	-0.04165	-0.41309
--	--	-0.04188	-0.62465	--	--	-0.04165	-0.41567
--	--	-0.04196	-0.62796	--	--	-0.04165	-0.41774
--	--	-0.04196	-0.6302	--	--	-0.042	-0.41945
--	--	-0.04196	-0.6313	--	--	-0.04207	-0.41993
--	--	-0.05183	-0.7688	--	--	-0.05212	-0.52126
--	--	-0.05197	-0.7729	--	--	-0.05212	-0.52374
--	--	-0.05212	-0.77648	--	--	-0.05212	-0.52571
--	--	-0.05227	-0.779	--	--	-0.05212	-0.52738
--	--	-0.05122	-0.78042	--	--	-0.0523	-0.52849
--	--	-0.06199	-0.91211	--	--	-0.06251	-0.62936
--	--	-0.06199	-0.91509	--	--	-0.06256	-0.63105
--	--	-0.06264	-0.91767	--	--	-0.06256	-0.6327
--	--	-0.06277	-0.91959	--	--	-0.06256	-0.63392
--	--	-0.0629	-0.92085	--	--	-0.06256	-0.63465
--	--	-0.0722	-1.04706	--	--	-0.0723	-0.72764
--	--	-0.0722	-1.04886	--	--	-0.07248	-0.72987
--	--	-0.0722	-1.05009	--	--	-0.07267	-0.73151
--	--	-0.07254	-1.05194	--	--	-0.07269	-0.73299
--	--	-0.07261	-1.05292	--	--	-0.07269	-0.73389
--	--	-0.08226	-1.17133	--	--	-0.082	-0.82701
--	--	-0.08226	-1.17401	--	--	-0.0821	-0.8291
--	--	-0.08226	-1.1762	--	--	-0.08221	-0.83115
--	--	-0.08226	-1.17743	--	--	-0.08231	-0.83234
--	--	-0.08269	-1.17878	--	--	-0.08157	-0.83309
--	--	-0.0926	-1.28916	--	--	-0.09217	-0.92322
--	--	-0.0926	-1.29136	--	--	-0.09258	-0.92515
--	--	-0.0926	-1.29212	--	--	-0.09268	-0.92675
--	--	-0.0926	-1.29332	--	--	-0.09278	-0.928
--	--	-0.0926	-1.29447	--	--	-0.09287	-0.92877
--	--	-0.10226	-1.4046	--	--	-0.1024	-1.01571
--	--	-0.10239	-1.40758	--	--	-0.1024	-1.0168
--	--	-0.1024	-1.41008	--	--	-0.1024	-1.01807
--	--	-0.1024	-1.41211	--	--	-0.10248	-1.01963
--	--	-0.1024	-1.41378	--	--	-0.10249	-1.02102
--	--	-0.1027	-1.41428	--	--	-0.10292	-1.01939
--	--	-0.10269	-1.41483	--	--	-0.10292	-1.01937
--	--	-0.10269	-1.4144	--	--	-0.10292	-1.01948
--	--	-0.10269	-1.41398	--	--	-0.10292	-1.01987
--	--	-0.10269	-1.41338	--	--	-0.10285	-1.02074
--	--	-0.13194	-1.6934	--	--	-0.13168	-1.25267
--	--	-0.1323	-1.70039	--	--	-0.13168	-1.26245
--	--	-0.1323	-1.70537	--	--	-0.13168	-1.26806
--	--	-0.1323	-1.7088	--	--	-0.13212	-1.27175
--	--	-0.1323	-1.71064	--	--	-0.1322	-1.27427
--	--	-0.16158	-1.9648	--	--	-0.16093	-1.50131
--	--	-0.16158	-1.96773	--	--	-0.16182	-1.50398
--	--	-0.16158	-1.97037	--	--	-0.16199	-1.50602
--	--	-0.16197	-1.97239	--	--	-0.16216	-1.50767
--	--	-0.16205	-1.97313	--	--	-0.16093	-1.50785
--	--	-0.19097	-2.18747	--	--	-0.19102	-1.70809
--	--	-0.19146	-2.19105	--	--	-0.19129	-1.71136
--	--	-0.19157	-2.1922	--	--	-0.19142	-1.71358
--	--	-0.19168	-2.19377	--	--	-0.19142	-1.71456
--	--	-0.19097	-2.19536	--	--	-0.19142	-1.71525
--	--	-0.22107	-2.39105	--	--	-0.22131	-1.89673
--	--	-0.2214	-2.39441	--	--	-0.22131	-1.89928
--	--	-0.22174	-2.39774	--	--	-0.22131	-1.90147
--	--	-0.22175	-2.4008	--	--	-0.22131	-1.90267
--	--	-0.22175	-2.40363	--	--	-0.22165	-1.9035
--	--	-0.25129	-2.56282	--	--	-0.25013	-2.054
--	--	-0.25129	-2.56485	--	--	-0.25013	-2.05712
--	--	-0.25129	-2.56703	--	--	-0.25082	-2.0592
--	--	-0.25129	-2.56846	--	--	-0.25097	-2.0621
--	--	-0.25138	-2.56896	--	--	-0.25112	-2.06317
--	--	-0.28034	-2.70649	--	--	-0.28034	-2.20282
--	--	-0.28034	-2.70966	--	--	-0.28057	-2.20485
--	--	-0.28034	-2.71315	--	--	-0.28081	-2.20736
--	--	-0.28095	-2.71682	--	--	-0.27923	-2.20885
--	--	-0.2811	-2.71951	--	--	-0.27923	-2.20976
--	--	-0.30986	-2.85779	--	--	-0.30991	-2.33311
--	--	-0.30986	-2.85998	--	--	-0.31028	-2.33526
--	--	-0.31051	-2.86195	--	--	-0.31034	-2.33732
--	--	-0.31063	-2.86225	--	--	-0.31034	-2.33869
--	--	-0.31076	-2.86065	--	--	-0.31034	-2.34009
--	--	-0.3401	-2.97113	--	--	-0.33978	-2.45578
--	--	-0.34031	-2.97215	--	--	-0.33978	-2.45662
--	--	-0.34052	-2.97228	--	--	-0.33978	-2.45772
--	--	-0.33908	-2.97213	--	--	-0.33978	-2.45899
--	--	-0.33908	-2.97177	--	--	-0.34023	-2.45992
--	--	-0.36974	-3.08898	--	--	-0.36918	-2.55832
--	--	-0.37002	-3.09152	--	--	-0.36918	-2.56002
--	--	-0.37002	-3.09216	--	--	-0.36918	-2.56026
--	--	-0.37002	-3.09135	--	--	-0.36957	-2.55964
--	--	-0.37002	-3.08951	--	--	-0.36966	-2.5598
--	--	-0.3991	-3.18078	--	--	-0.3984	-2.6488
--	--	-0.3991	-3.18073	--	--	-0.39884	-2.64789
--	--	-0.3991	-3.17958	--	--	-0.39895	-2.64837
--	--	-0.39953	-3.17843	--	--	-0.39905	-2.64869
--	--	-0.39963	-3.17902	--	--	-0.39916	-2.64819
--	--	-0.42827	-3.25915	--	--	-0.42875	-2.73623
--	--	-0.42879	-3.26002	--	--	-0.42896	-2.73623
--	--	-0.42891	-3.26159	--	--	-0.42916	-2.73759
--	--	-0.42904	-3.26246	--	--	-0.42775	-2.73932
--	--	-0.42916	-3.2626	--	--	-0.42775	-2.73993
--	--	-0.45856	-3.33695	--	--	-0.45832	-2.81095
--	--	-0.4588	-3.33655	--	--	-0.45855	-2.8102
--	--	-0.45904	-3.33692	--	--	-0.45855	-2.80936
--	--	-0.45732	-3.3389	--	--	-0.45855	-2.80858
--	--	-0.45732	-3.34085	--	--	-0.45855	-2.80949
--	--	-0.48866	-3.43538	--	--	-0.48782	-2.88038
--	--	-0.48881	-3.4407	--	--	-0.48782	-2.8811
--	--	-0.48881	-3.44299	--	--	-0.48782	-2.88182
--	--	-0.48881	-3.4437	--	--	-0.48836	-2.88206
--	--	-0.48881	-3.4422	--	--	-0.48848	-2.8819
--	--	-0.51805	-3.48535	--	--	-0.51726	-2.94002
--	--	-0.51805	-3.48671	--	--	-0.51795	-2.94176
--	--	-0.51805	-3.48704	--	--	-0.5181	-2.94333
--	--	-0.51851	-3.4878	--	--	-0.51826	-2.94425
--	--	-0.51861	-3.48808	--	--	-0.51841	-2.94505
--	--	-0.54753	-3.53687	--	--	-0.54764	-3.00441
--	--	-0.54753	-3.53495	--	--	-0.54799	-3.00224
--	--	-0.54822	-3.53313	--	--	-0.54835	-3.00192
--	--	-0.54837	-3.53346	--	--	-0.54839	-3.00207
--	--	-0.54851	-3.53731	--	--	-0.54839	-3.00207
--	--	-0.57785	-3.60959	--	--	-0.57764	-3.05603
--	--	-0.57814	-3.60949	--	--	-0.5778	-3.05733
--	--	-0.57843	-3.6084	--	--	-0.5778	-3.05844
--	--	-0.57648	-3.60746	--	--	-0.5778	-3.05806
--	--	-0.57648	-3.60696	--	--	-0.5778	-3.05661
--	--	-0.60802	-3.65511	--	--	-0.60783	-3.1042
--	--	-0.60842	-3.65632	--	--	-0.60783	-3.10258
--	--	-0.60842	-3.65822	--	--	-0.60783	-3.1012
--	--	-0.60842	-3.65947	--	--	-0.60783	-3.10047
--	--	-0.60842	-3.65975	--	--	-0.60832	-3.10003
--	--	-0.63813	-3.70215	--	--	-0.63757	-3.13642
--	--	-0.63813	-3.69984	--	--	-0.63757	-3.14057
--	--	-0.63813	-3.69849	--	--	-0.63825	-3.14339
--	--	-0.63873	-3.69854	--	--	-0.63839	-3.1451
--	--	-0.63887	-3.69909	--	--	-0.63854	-3.14587
--	--	-0.66809	-3.74537	--	--	-0.66786	-3.17402
--	--	-0.66809	-3.74843	--	--	-0.66813	-3.17398
--	--	-0.66873	-3.74839	--	--	-0.66839	-3.17402
--	--	-0.66886	-3.74667	--	--	-0.66662	-3.17432
--	--	-0.66899	-3.748	--	--	-0.66662	-3.175
--	--	-0.6969	-3.78196	--	--	-0.69791	-3.22199
--	--	-0.6969	-3.78482	--	--	-0.69824	-3.22208
--	--	-0.6969	-3.78897	--	--	-0.69824	-3.22203
--	--	-0.69846	-3.79276	--	--	-0.69824	-3.22166
--	--	-0.69878	-3.79593	--	--	-0.69824	-3.22156
--	--	-0.72772	-3.83758	--	--	-0.72784	-3.25439
--	--	-0.72866	-3.83567	--	--	-0.72784	-3.2529
--	--	-0.72885	-3.83503	--	--	-0.72784	-3.25107
--	--	-0.72903	-3.83561	--	--	-0.72832	-3.24828
--	--	-0.72772	-3.83749	--	--	-0.72842	-3.24533
--	--	-0.75862	-3.87767	--	--	-0.75749	-3.28339
--	--	-0.75898	-3.88344	--	--	-0.75859	-3.28305
--	--	-0.75928	-3.88695	--	--	-0.75883	-3.28173
--	--	-0.75928	-3.88799	--	--	-0.75907	-3.28026
--	--	-0.75928	-3.88718	--	--	-0.75749	-3.2796
--	--	-0.78896	-3.90151	--	--	-0.78866	-3.3094
--	--	-0.78951	-3.90589	--	--	-0.78899	-3.31164
--	--	-0.78967	-3.90906	--	--	-0.78931	-3.31268
--	--	-0.78967	-3.91033	--	--	-0.78937	-3.31244
--	--	-0.78967	-3.90964	--	--	-0.78937	-3.31352
--	--	-0.81758	-3.93005	--	--	-0.81851	-3.33849
--	--	-0.81824	-3.9338	--	--	-0.81854	-3.33936
--	--	-0.81891	-3.93829	--	--	-0.81854	-3.34033
--	--	-0.81922	-3.94237	--	--	-0.81854	-3.34142
--	--	-0.81922	-3.94392	--	--	-0.81854	-3.34237
--	--	-0.84925	-3.95527	--	--	-0.84865	-3.36122
--	--	-0.84952	-3.95405	--	--	-0.84865	-3.36112
--	--	-0.84952	-3.95429	--	--	-0.84901	-3.36059
--	--	-0.84952	-3.95626	--	--	-0.84909	-3.36072
--	--	-0.84952	-3.96015	--	--	-0.84918	-3.36087
--	--	-0.87892	-3.99116	--	--	-0.87757	-3.38645
--	--	-0.87892	-3.99281	--	--	-0.87851	-3.38583
--	--	-0.87892	-3.99464	--	--	-0.8787	-3.38432
--	--	-0.87946	-3.99542	--	--	-0.87889	-3.38281
--	--	-0.87958	-3.99545	--	--	-0.87757	-3.38232
--	--	-0.90785	-4.02074	--	--	-0.90808	-3.40047
--	--	-0.90882	-4.02308	--	--	-0.90848	-3.39969
--	--	-0.90905	-4.02391	--	--	-0.90873	-3.39837
--	--	-0.90928	-4.02488	--	--	-0.90873	-3.398
--	--	-0.90951	-4.02653	--	--	-0.90873	-3.39818
--	--	-0.93794	-4.0484	--	--	-0.9376	-3.42369
--	--	-0.93826	-4.04946	--	--	-0.9376	-3.42541
--	--	-0.93858	-4.04939	--	--	-0.9376	-3.42602
--	--	-0.93869	-4.04836	--	--	-0.9376	-3.42615
--	--	-0.93869	-4.04535	--	--	-0.93808	-3.4265
--	--	-0.96736	-4.06268	--	--	-0.96652	-3.44018
--	--	-0.96748	-4.06536	--	--	-0.96652	-3.44018
--	--	-0.96748	-4.06673	--	--	-0.96695	-3.44078
--	--	-0.96748	-4.06718	--	--	-0.96705	-3.4409
--	--	-0.96748	-4.06691	--	--	-0.96715	-3.44031
		-0.99568	-4.07885			-0.9949	-3.45948
		-0.99568	-4.07788			-0.99517	-3.46066
		-0.99568	-4.07681			-0.99544	-3.46148
		-0.99587	-4.07743			-0.99571	-3.46264
		-0.99591	-4.07942			-0.99377	-3.46337
		-0.9681	-4.06488			-0.96771	-3.45735
		-0.9681	-4.06413			-0.9675	-3.45444
		-0.96767	-4.06251			-0.96729	-3.45135
		-0.96758	-4.06012			-0.96723	-3.44893
		-0.96748	-4.05753			-0.96723	-3.44687
		-0.9388	-4.04264			-0.93807	-3.42922
		-0.93851	-4.04453			-0.93768	-3.42783
		-0.93844	-4.04651			-0.93759	-3.42694
		-0.93838	-4.04844			-0.93759	-3.42727
		-0.93831	-4.05186			-0.93759	-3.42825
		-0.90903	-4.01411			-0.90821	-3.40005
		-0.90891	-4.01322			-0.9081	-3.40135
		-0.9088	-4.01228			-0.9081	-3.40282
		-0.90876	-4.01143			-0.9081	-3.40411
		-0.90876	-4.01153			-0.9081	-3.40386
		-0.87924	-3.99394			-0.87888	-3.38253
		-0.87917	-3.99165			-0.87888	-3.3806
		-0.87917	-3.98887			-0.87866	-3.37876
		-0.87917	-3.98582			-0.87861	-3.37625
		-0.87917	-3.98519			-0.87856	-3.37436
		-0.84911	-3.9764			-0.84931	-3.35795
		-0.84911	-3.97674			-0.84848	-3.35822
		-0.84911	-3.97725			-0.84831	-3.3597
		-0.84911	-3.97691			-0.84814	-3.36207
		-0.84897	-3.97612			-0.84931	-3.36572
		-0.81907	-3.95056			-0.8188	-3.3342
		-0.81907	-3.94984			-0.8186	-3.337
		-0.81876	-3.94781			-0.81839	-3.3397
		-0.8187	-3.94497			-0.81975	-3.34231
		-0.81864	-3.94251			-0.81975	-3.34352
		-0.78881	-3.91071			-0.78847	-3.31789
		-0.78857	-3.90848			-0.78809	-3.31718
		-0.78832	-3.90688			-0.78784	-3.31628
		-0.78822	-3.90531			-0.78784	-3.31586
		-0.78822	-3.90387			-0.78784	-3.31469
		-0.75816	-3.86653			-0.75819	-3.28569
		-0.75807	-3.8631			-0.75807	-3.2854
		-0.75807	-3.86255			-0.75807	-3.28466
		-0.75807	-3.86474			-0.75807	-3.28344
		-0.75807	-3.86858			-0.75807	-3.2819
		-0.72847	-3.8411			-0.72755	-3.25164
		-0.72847	-3.84			-0.72755	-3.24974
		-0.72847	-3.8395			-0.72755	-3.24822
		-0.72786	-3.83855			-0.72754	-3.24817
		-0.72774	-3.83759			-0.72754	-3.24826
		-0.69868	-3.8087			-0.69823	-3.22284
		-0.69821	-3.8055			-0.69823	-3.22103
		-0.69811	-3.80282			-0.69756	-3.2182
		-0.69801	-3.8009			-0.69742	-3.21544
		-0.69868	-3.80061			-0.69727	-3.21334
		-0.66802	-3.76804			-0.66844	-3.18373
		-0.66773	-3.76903			-0.66781	-3.18231
		-0.66746	-3.77111			-0.66767	-3.18063
		-0.66746	-3.77301			-0.66752	-3.17993
		-0.66746	-3.7735			-0.66738	-3.1796
		-0.63768	-3.71731			-0.63766	-3.14524
		-0.63768	-3.71716			-0.63746	-3.14547
		-0.63768	-3.71588			-0.63727	-3.14492
		-0.63768	-3.71335			-0.63708	-3.144
		-0.6375	-3.71221			-0.63848	-3.14248
		-0.60788	-3.68676			-0.60728	-3.10141
		-0.60788	-3.68349			-0.607	-3.10022
		-0.60788	-3.67851			-0.60671	-3.09933
		-0.60747	-3.67441			-0.60871	-3.09887
		-0.60739	-3.67268			-0.60871	-3.09891
		-0.5781	-3.63037			-0.57721	-3.05417
		-0.57725	-3.63171			-0.57685	-3.05406
		-0.57707	-3.6335			-0.57664	-3.05447
		-0.57689	-3.63281			-0.57664	-3.05439
		-0.5781	-3.63108			-0.57664	-3.05455
		-0.54736	-3.56516			-0.5472	-3.00506
		-0.54709	-3.56254			-0.54696	-3.00407
		-0.54682	-3.55841			-0.54696	-3.00174
		-0.54681	-3.55585			-0.54696	-3.00073
		-0.54681	-3.55316			-0.54696	-3.00065
		-0.5175	-3.5172			-0.51734	-2.93836
		-0.51703	-3.51675			-0.51734	-2.93802
		-0.51703	-3.51655			-0.51734	-2.93847
		-0.51703	-3.51591			-0.51686	-2.93972
		-0.51703	-3.51374			-0.51676	-2.94136
		-0.48762	-3.4414			-0.48793	-2.88084
		-0.48755	-3.4382			-0.48793	-2.8798
		-0.48755	-3.43661			-0.48723	-2.87881
		-0.48755	-3.43646			-0.48707	-2.87794
		-0.48755	-3.43682			-0.48692	-2.87653
		-0.45747	-3.36792			-0.45729	-2.82092
		-0.45747	-3.36358			-0.45706	-2.81873
		-0.45747	-3.35922			-0.45683	-2.81528
		-0.45747	-3.35499			-0.45836	-2.81213
		-0.45713	-3.35302			-0.45836	-2.80964
		-0.42801	-3.28105			-0.42765	-2.74366
		-0.42801	-3.27774			-0.42735	-2.74235
		-0.42801	-3.27542			-0.42735	-2.74126
		-0.42745	-3.27615			-0.42735	-2.73974
		-0.42734	-3.2789			-0.42735	-2.7384
		-0.39866	-3.1998			-0.39774	-2.65199
		-0.39866	-3.19678			-0.39774	-2.65131
		-0.39802	-3.19637			-0.39774	-2.65135
		-0.39788	-3.19766			-0.39774	-2.65164
		-0.39775	-3.19843			-0.39739	-2.65236
		-0.36838	-3.09784			-0.36797	-2.56083
		-0.36818	-3.09449			-0.36797	-2.56109
		-0.36798	-3.09335			-0.36758	-2.56078
		-0.36778	-3.09278			-0.36748	-2.55977
		-0.36848	-3.09312			-0.36738	-2.55856
		-0.33868	-2.99423			-0.3388	-2.45133
		-0.33837	-2.99057			-0.3388	-2.44995
		-0.33806	-2.98667			-0.33811	-2.44908
		-0.33794	-2.98281			-0.33797	-2.44823
		-0.33794	-2.98026			-0.33783	-2.44828
		-0.30912	-2.86477			-0.30978	-2.33951
		-0.30874	-2.86302			-0.30876	-2.33769
		-0.30852	-2.86297			-0.30856	-2.33687
		-0.30852	-2.86255			-0.30835	-2.33649
		-0.30852	-2.86037			-0.30978	-2.33514
		-0.27925	-2.72911			-0.27898	-2.21294
		-0.27891	-2.72591			-0.27871	-2.21097
		-0.27891	-2.72487			-0.27844	-2.20906
		-0.27891	-2.72416			-0.27831	-2.2076
		-0.27891	-2.72258			-0.27831	-2.20587
		-0.24888	-2.57495			-0.24888	-2.05994
		-0.24884	-2.57374			-0.24859	-2.05686
		-0.24884	-2.57026			-0.24859	-2.05548
		-0.24884	-2.56749			-0.24859	-2.05481
		-0.24884	-2.56536			-0.24859	-2.05467
		-0.21936	-2.40338			-0.2187	-1.89709
		-0.21936	-2.39938			-0.2187	-1.89383
		-0.21936	-2.39593			-0.2187	-1.8922
		-0.21936	-2.39244			-0.2187	-1.89102
		-0.21886	-2.38963			-0.21841	-1.89019
		-0.18919	-2.19697			-0.18897	-1.71364
		-0.18919	-2.19237			-0.18897	-1.71042
		-0.18919	-2.18875			-0.18897	-1.70674
		-0.1887	-2.18657			-0.18869	-1.70452
		-0.1886	-2.18567			-0.18863	-1.70162
		-0.15985	-1.96799			-0.1597	-1.501
		-0.15985	-1.96398			-0.1597	-1.49605
		-0.1591	-1.96144			-0.15896	-1.49269
		-0.15894	-1.95933			-0.15881	-1.48998
		-0.15879	-1.95685			-0.15865	-1.4882
		-0.12945	-1.69664			-0.13033	-1.26574
		-0.12926	-1.69244			-0.12953	-1.26122
		-0.12906	-1.69051			-0.12935	-1.2577
		-0.13039	-1.68796			-0.12918	-1.25472
		-0.13039	-1.68656			-0.13033	-1.25303
		-0.09944	-1.38484			-0.09945	-0.9987
		-0.09917	-1.37933			-0.09918	-0.99422
		-0.09917	-1.37503			-0.09893	-0.99071
		-0.09917	-1.37195			-0.09893	-0.98854
		-0.09917	-1.37011			-0.09893	-0.98677
		-0.08904	-1.25849			-0.08944	-0.89736
		-0.08894	-1.25518			-0.08889	-0.89529
		-0.08883	-1.25211			-0.08876	-0.89398
		-0.08953	-1.25029			-0.08864	-0.89278
		-0.08953	-1.24938			-0.08851	-0.89194
		-0.07913	-1.1347			-0.0788	-0.79659
		-0.07871	-1.13222			-0.0788	-0.79535
		-0.07862	-1.12967			-0.07856	-0.79496
		-0.07852	-1.12744			-0.07851	-0.79446
		-0.07842	-1.12664			-0.07845	-0.79294
		-0.06879	-1.01016			-0.0686	-0.70071
		-0.06879	-1.00716			-0.0686	-0.69898
		-0.06879	-1.00474			-0.0686	-0.69735
		-0.0686	-1.00271			-0.0686	-0.69561
		-0.06855	-1.00043			-0.0686	-0.69445
		-0.05888	-0.87637			-0.05912	-0.59942
		-0.0587	-0.87366			-0.05899	-0.59659
		-0.0587	-0.87177			-0.05887	-0.59461
		-0.0587	-0.87095			-0.05887	-0.59374
		-0.0587	-0.86998			-0.05887	-0.59307
		-0.04903	-0.73748			-0.04946	-0.49487
		-0.04888	-0.73391			-0.04885	-0.49264
		-0.04872	-0.7307			-0.04871	-0.49103
		-0.04976	-0.72829			-0.04857	-0.48963
		-0.04976	-0.72675			-0.04843	-0.48871
		-0.03909	-0.5877			-0.03893	-0.38674
		-0.03909	-0.5836			-0.03893	-0.38477
		-0.03854	-0.57996			-0.03862	-0.38317
		-0.03841	-0.57755			-0.03854	-0.38177
		-0.03828	-0.57606			-0.03847	-0.38083
		-0.02902	-0.44054			-0.02865	-0.2857
		-0.02902	-0.43656			-0.02865	-0.28287
		-0.02902	-0.43328			-0.02865	-0.2803
		-0.02902	-0.43076			-0.02865	-0.27795
		-0.02877	-0.42946			-0.02841	-0.27663
		-0.01907	-0.28699			-0.01884	-0.17769
		-0.01889	-0.28316			-0.01873	-0.17479
		-0.01876	-0.28041			-0.01873	-0.17279
		-0.01876	-0.27791			-0.01873	-0.17118
		-0.01876	-0.2753			-0.01873	-0.16962
		-0.00923	-0.12958			-0.0092	-0.06907
		-0.00906	-0.12628			-0.00901	-0.06658
		-0.00891	-0.12364			-0.009	-0.06453
		-0.00891	-0.12135			-0.009	-0.06355
		-0.00891	-0.11972			-0.009	-0.06232
		0.000368202	0.01689			0.000590558	0.03256
		0.000527708	0.02128			0.000763987	0.03498
		0.000687534	0.02434			0.000925102	0.03734
		-0.000367858	0.0269			0.000925102	0.03955
		-0.000367858	0.0293			0.000925102	0.04112
		0.01098	0.18441			0.01117	0.14804
		0.01099	0.18812			0.01117	0.15061
		0.01099	0.19124			0.01117	0.1528
		0.01099	0.19356			0.01117	0.15473
		0.01099	0.19472			0.01142	0.15625
		0.0212	0.33851			0.02079	0.25399
		0.0212	0.3415			0.02079	0.25692
		0.0212	0.34422			0.02079	0.25898
		0.0212	0.34701			0.02132	0.26062
		0.02149	0.34879			0.02145	0.26239
		0.031	0.49303			0.03117	0.36314
		0.03108	0.49684			0.03117	0.36564
		0.03108	0.49982			0.03117	0.36799
		0.03108	0.50254			0.0314	0.37004
		0.03108	0.5043			0.03145	0.37103
		0.04082	0.63465			0.04093	0.46549
		0.04102	0.63804			0.04112	0.46841
		0.04122	0.64136			0.04112	0.47096
		0.04129	0.6448			0.04112	0.47303
		0.04129	0.64757			0.04112	0.47443
		0.05083	0.79021			0.05139	0.5771
		0.0515	0.79354			0.05151	0.57935
		0.05163	0.79664			0.05161	0.58145
		0.05176	0.79919			0.05161	0.58347
		0.05083	0.80019			0.05161	0.58444
		0.06173	0.93286			0.06119	0.68175
		0.06173	0.93596			0.06159	0.68421
		0.06194	0.93839			0.06168	0.68673
		0.06199	0.9405			0.06177	0.68806
		0.06203	0.94226			0.06119	0.6896
		0.07166	1.06483			0.07177	0.78333
		0.07166	1.06806			0.07177	0.78586
		0.07166	1.07064			0.07177	0.78729
		0.07184	1.07289			0.07195	0.78829
		0.07188	1.07438			0.07199	0.78927
		0.08177	1.19178			0.08194	0.87901
		0.08177	1.19425			0.08194	0.8812
		0.08177	1.19545			0.08194	0.88231
		0.08177	1.19607			0.08194	0.88305
		0.08202	1.19704			0.08205	0.88378
		0.09186	1.30681			0.09173	0.97711
		0.09195	1.30981			0.09184	0.97868
		0.09195	1.31199			0.09184	0.97977
		0.09195	1.31303			0.09184	0.9807
		0.09195	1.31378			0.09184	0.98086
		0.10173	1.42105			0.10167	1.07338
		0.10186	1.42345			0.10167	1.0725
		0.10196	1.42499			0.10188	1.07223
		0.10196	1.42588			0.10193	1.07226
		0.10196	1.42625			0.10198	1.07243
		0.10208	1.43368			0.13132	1.31897
		0.10208	1.43384			0.13149	1.32205
		0.10209	1.43388			0.13166	1.3246
		0.10209	1.43413			0.13183	1.3263
		0.10205	1.43464			0.13122	1.32707
		0.13118	1.72055			0.16127	1.55074
		0.13155	1.72506			0.16166	1.55398
		0.13161	1.72802			0.16168	1.55748
		0.13161	1.73051			0.16168	1.55986
		0.13161	1.73357			0.16168	1.56213
		0.16079	1.98027			0.18948	1.73974
		0.16091	1.98591			0.19012	1.74665
		0.16091	1.99004			0.19075	1.75208
		0.16091	1.99363			0.19084	1.7558
		0.16091	1.99601			0.19084	1.75742
		0.19097	2.21177			0.22085	1.94455
		0.19097	2.21605			0.22108	1.94818
		0.19097	2.21825			0.22108	1.95082
		0.1912	2.21925			0.22108	1.95299
		0.19124	2.21946			0.22108	1.95392
		0.22027	2.40573			0.25048	2.11299
		0.22027	2.40988			0.25048	2.11461
		0.22117	2.41304			0.25048	2.11576
		0.22136	2.41529			0.25112	2.11468
		0.22154	2.41857			0.25125	2.11391
		0.25067	2.59759			0.28003	2.25444
		0.25087	2.59814			0.28074	2.25655
		0.25107	2.59931			0.28089	2.25853
		0.24969	2.59959			0.28104	2.2609
		0.24969	2.6014			0.28003	2.26164
		0.2805	2.7562			0.30853	2.38517
		0.2809	2.76054			0.30853	2.38427
		0.28126	2.76335			0.30992	2.38469
		0.28126	2.76463			0.31022	2.38536
		0.28126	2.76356			0.31053	2.3858
		0.31105	2.88891			0.33942	2.49944
		0.31108	2.88967			0.34014	2.50209
		0.31108	2.88971			0.34029	2.50166
		0.31108	2.88975			0.34043	2.50086
		0.31108	2.88988			0.33942	2.50086
		0.34068	3.0097			0.36987	2.6005
		0.34068	3.00906			0.37019	2.60018
		0.34068	3.00829			0.37041	2.59983
		0.34109	3.00767			0.37041	2.59994
		0.34117	3.00763			0.37041	2.60065
		0.36994	3.11372			0.40001	2.69823
		0.37049	3.11674			0.40034	2.70128
		0.3706	3.11932			0.40034	2.70391
		0.37072	3.12142			0.40034	2.70543
		0.36994	3.12172			0.40034	2.70586
		0.3995	3.20855			0.43004	2.78251
		0.39985	3.21277			0.43004	2.78362
		0.4002	3.21683			0.43004	2.78457
		0.39786	3.21999			0.43049	2.78428
		0.39786	3.22221			0.43059	2.78333
		0.42982	3.30786			0.45912	2.85394
		0.43002	3.30883			0.45969	2.85395
		0.43002	3.31109			0.45982	2.85465
		0.43002	3.31389			0.45994	2.8556
		0.43002	3.31506			0.46007	2.85655
		0.46007	3.38637			0.48971	2.92382
		0.46007	3.39277			0.49	2.92272
		0.46007	3.39644			0.49029	2.92244
		0.46007	3.39463			0.49033	2.92247
		0.46052	3.39163			0.49033	2.9231
		0.48911	3.46415			0.51966	2.98334
		0.48972	3.46839			0.52001	2.98383
		0.48986	3.4698			0.52001	2.98448
		0.49001	3.46916			0.52001	2.98495
		0.49015	3.46763			0.52001	2.98525
		0.51974	3.51396			0.54788	3.02817
		0.52005	3.52075			0.54871	3.03059
		0.52036	3.52578			0.54939	3.03287
		0.52047	3.52918			0.54939	3.03569
		0.52047	3.53049			0.54939	3.03742
		0.54965	3.57343			0.57924	3.08655
		0.54981	3.57316			0.57924	3.08677
		0.54981	3.57332			0.57924	3.08813
		0.54981	3.57515			0.57924	3.08983
		0.54981	3.57661			0.57967	3.09035
		0.5796	3.63015			0.60879	3.14277
		0.5796	3.62837			0.60879	3.14439
		0.5796	3.62868			0.60941	3.14437
		0.57981	3.63058			0.60956	3.14327
		0.57986	3.6331			0.60971	3.14214
		0.60856	3.6895			0.63803	3.1756
		0.60932	3.69232			0.63885	3.17709
		0.60948	3.6927			0.63905	3.17792
		0.60965	3.69135			0.63924	3.17841
		0.60856	3.69166			0.63944	3.17884
		0.63929	3.73313			0.66842	3.22214
		0.63964	3.73596			0.66874	3.22291
		0.63999	3.73945			0.66906	3.22307
		0.64003	3.74257			0.66703	3.22292
		0.64003	3.74598			0.66703	3.2223
		0.66927	3.77552			0.69898	3.25083
		0.6694	3.77801			0.69948	3.25128
		0.6694	3.77888			0.69948	3.25183
		0.6694	3.77812			0.69948	3.2526
		0.6694	3.77627			0.69948	3.25499
		0.69927	3.84688			0.72904	3.2929
		0.69927	3.84418			0.72904	3.29476
		0.69927	3.84051			0.72904	3.29613
		0.6998	3.83596			0.72928	3.29624
		0.69991	3.83261			0.72933	3.29561
		0.7284	3.86708			0.75768	3.32318
		0.72916	3.87152			0.75831	3.32216
		0.72933	3.87061			0.75845	3.32141
		0.72949	3.86593			0.7586	3.32149
		0.7284	3.86063			0.75875	3.32074
		0.75866	3.90394			0.78764	3.34559
		0.75894	3.90407			0.78792	3.34525
		0.75919	3.90476			0.7882	3.34497
		0.75919	3.9049			0.78833	3.34602
		0.75919	3.90402			0.78833	3.34923
		0.78778	3.93738			0.81738	3.37731
		0.78826	3.93961			0.81762	3.37814
		0.78826	3.93979			0.81762	3.37778
		0.78826	3.93847			0.81762	3.37834
		0.78826	3.93684			0.81762	3.37939
		0.81765	3.96887			0.84671	3.40349
		0.81765	3.97126			0.84671	3.40306
		0.81765	3.97378			0.84671	3.40272
		0.81765	3.97575			0.84714	3.40272
		0.81829	3.97694			0.84724	3.40191
		0.84663	3.99867			0.87552	3.42685
		0.84663	3.99837			0.87556	3.42573
		0.84726	3.99607			0.87556	3.42386
		0.84739	3.99347			0.87556	3.42251
		0.84751	3.99239			0.87611	3.42099
		0.87603	4.02446			0.90414	3.44165
		0.87633	4.02746			0.90414	3.44241
		0.87662	4.03019			0.90462	3.44293
		0.87459	4.03161			0.90474	3.44387
		0.87459	4.03184			0.90485	3.44531
		0.90482	4.04663			0.93314	3.46726
		0.90514	4.0442			0.93337	3.46737
		0.90514	4.04282			0.9336	3.46742
		0.90514	4.04194			0.93383	3.46747
		0.90514	4.04246			0.93217	3.46661
		0.93341	4.06317			0.9618	3.4794
		0.93341	4.06691			0.96219	3.48052
		0.93341	4.07087			0.96232	3.48218
		0.934	4.0753			0.96232	3.48394
		0.93413	4.07462			0.96232	3.48468
		0.96168	4.06635			0.99875	3.50308
		0.96244	4.06752			0.99875	3.5038
		0.96261	4.06923			0.99875	3.50448
		0.96277	4.07044			0.99875	3.50553
		0.96168	4.07177			0.99933	3.5055
		0.99904	4.12954
		0.99971	4.1306
		1.00023	4.12994
		1.00023	4.12822
		1.00023	4.12533

## Sheet: Figure 1c
MNP1		MNP2
0.97966	71.5625	1.00121	157.993
0.97987	71.575	1.0014	158.279
0.98007	71.575	1.00121	158.522
0.97873	71.575	1.00121	158.603
0.97873	71.575	1.00141	158.581
0.95296	71.0875	0.96357	157.801
0.95275	71.0625	0.96411	157.61
0.95254	71.05	0.96382	157.831
0.95253	71.05	0.96411	157.684
0.95253	71.05	0.96411	157.632
0.92455	70.525	0.93514	156.346
0.92427	70.5125	0.93528	156.485
0.92427	70.5125	0.93528	156.449
0.92427	70.5	0.93478	156.434
0.92427	70.5	0.93528	156.471
0.89555	69.95	0.90612	155.294
0.89555	69.9375	0.90572	155.294
0.89555	69.925	0.90612	155.191
0.89538	69.9125	0.90568	155.103
0.89533	69.9125	0.90612	155.228
0.86713	69.4	0.87698	154.456
0.86713	69.3875	0.87705	154.36
0.86684	69.3625	0.8767	154.14
0.86677	69.35	0.87705	153.978
0.8667	69.3375	0.87705	154.566
0.83794	68.75	0.84751	153.176
0.83779	68.75	0.84707	153.118
0.83764	68.7375	0.84813	153.375
0.8375	68.725	0.84733	153.375
0.83855	68.7125	0.84813	153.375
0.80884	68.125	0.81812	151.926
0.80854	68.1125	0.81776	151.904
0.80824	68.0875	0.81812	151.846
0.80822	68.0875	0.81754	151.941
0.80822	68.075	0.81812	151.551
0.77922	67.4625	0.78869	150.64
0.77922	67.45	0.78869	150.493
0.77922	67.425	0.78811	150.765
0.77922	67.4125	0.78869	150.846
0.77901	67.425	0.78835	150.456
0.74985	66.7375	0.75848	149.118
0.74985	66.725	0.75919	149.169
0.74957	66.7	0.75843	149.375
0.7495	66.6875	0.75919	149.463
0.74943	66.6875	0.75853	149.368
0.72136	66.0125	0.72881	147.551
0.72057	65.9875	0.729	147.228
0.72039	65.9875	0.72855	147.066
0.7202	65.975	0.729	147.316
0.72002	65.9625	0.729	147.684
0.69111	65.25	0.69927	146.14
0.6909	65.2375	0.69967	146.081
0.69069	65.2375	0.69967	146.029
0.69063	65.225	0.6988	146.029
0.69063	65.2125	0.69967	146.007
0.66171	64.4375	0.66918	144.309
0.66132	64.4125	0.66902	144.272
0.66123	64.4	0.66918	144.265
0.66123	64.4	0.66918	144.088
0.66123	64.4	0.66892	144.199
0.63178	63.5625	0.63889	142.382
0.63177	63.5375	0.63889	142.346
0.63177	63.5375	0.63889	142.265
0.63177	63.525	0.63889	142.265
0.63153	63.5	0.63901	142.213
0.60221	62.6625	0.60919	140.566
0.60221	62.6375	0.60992	140.434
0.60221	62.6125	0.60897	140.316
0.60182	62.6	0.60992	139.868
0.60173	62.5875	0.60908	140.11
0.57307	61.675	0.57896	138.441
0.57307	61.65	0.5793	138.118
0.57238	61.6375	0.5787	138.338
0.57222	61.625	0.5793	138.228
0.57206	61.6125	0.5793	138.191
0.54276	60.6	0.54884	135.794
0.5426	60.5875	0.54969	135.794
0.54244	60.5875	0.54969	135.801
0.54349	60.5625	0.54849	135.801
0.54349	60.5625	0.54969	135.699
0.5134	59.5125	0.51927	133.096
0.51306	59.4875	0.51868	132.75
0.51271	59.4625	0.51927	133.015
0.51266	59.45	0.51876	133.221
0.51266	59.4375	0.51927	133
0.48367	58.3	0.48934	130.441
0.4832	58.275	0.48903	130.338
0.48314	58.2625	0.48934	130.316
0.48314	58.2375	0.48934	129.985
0.48314	58.225	0.48888	129.838
0.45381	57	0.45896	127.294
0.45381	56.975	0.45863	126.816
0.45381	56.95	0.45896	126.89
0.45381	56.9375	0.45896	127.125
0.45361	56.925	0.45883	127.154
0.42438	55.5625	0.42912	123.853
0.42438	55.5375	0.4296	123.934
0.42411	55.5125	0.42887	123.699
0.42405	55.4875	0.4296	123.463
0.42398	55.475	0.4296	123.838
0.39548	54.0125	0.39911	120.162
0.39462	53.975	0.39951	120.081
0.39442	53.95	0.39951	119.904
0.39422	53.925	0.39882	119.846
0.39402	53.9	0.39951	119.794
0.36504	52.2375	0.36938	116.103
0.36475	52.2	0.36895	115.691
0.36446	52.1875	0.36938	116.103
0.36445	52.1625	0.36862	116.103
0.36445	52.15	0.36938	115.632
0.33581	50.3625	0.33903	110.941
0.33535	50.325	0.33891	110.441
0.33535	50.2875	0.33903	110.456
0.33535	50.2625	0.33903	111.096
0.33535	50.2375	0.33855	111.096
0.30579	48.2	0.3091	105.544
0.3057	48.15	0.3091	105.846
0.3057	48.1125	0.30857	105.566
0.3057	48.0875	0.3091	105.559
0.3057	48.075	0.30869	105.507
0.27621	45.8125	0.27932	99.75
0.27621	45.7625	0.27866	99.4191
0.27621	45.7125	0.27932	99.0882
0.27575	45.6875	0.27932	99.5221
0.27564	45.6625	0.2785	99.4779
0.24687	43.025	0.24858	93.3897
0.24616	42.9875	0.24957	93.2132
0.24598	42.9375	0.24875	93.1176
0.2458	42.9125	0.24957	93.3676
0.24563	42.9	0.24882	93.2794
0.21808	40	0.21904	85.7794
0.21665	39.925	0.21992	85.6471
0.21637	39.8875	0.21868	85.5662
0.21608	39.8375	0.21992	85.5441
0.21808	39.8	0.21992	85.6176
0.18695	36.375	0.18884	78.2279
0.18663	36.3125	0.18897	77.4853
0.18643	36.275	0.18897	77.5221
0.18643	36.25	0.1885	77.2794
0.18643	36.225	0.18897	77.2132
0.15743	32.425	0.15881	67.7206
0.15715	32.3375	0.15881	67.4926
0.15715	32.275	0.15826	67.6029
0.15715	32.225	0.15881	67.7353
0.15715	32.1875	0.15839	67.7574
0.12744	27.725	0.12876	57.6985
0.12744	27.6375	0.12838	57.6691
0.12744	27.575	0.12876	57.5221
0.12717	27.5375	0.12876	57.3309
0.12712	27.5	0.12835	57.2426
0.09801	22.35	0.09822	45.8088
0.09734	22.2625	0.09822	45.9265
0.09719	22.2125	0.09809	45.6029
0.09705	22.1625	0.09822	45.4632
0.09801	22.1375	0.09815	45.4779
0.08762	20.3	0.08831	41.2941
0.08762	20.25	0.08816	41.1691
0.08762	20.2125	0.08831	40.9926
0.08732	20.175	0.08831	41.4559
0.08725	20.1625	0.08805	41.4706
0.07717	18.25	0.07836	36.8676
0.07717	18.2	0.07859	36.8235
0.07717	18.1625	0.07859	36.8603
0.07717	18.125	0.07783	36.8603
0.07695	18.1125	0.07859	36.8824
0.06776	16.2125	0.06824	32.7206
0.0676	16.1625	0.0685	32.4853
0.06751	16.125	0.06793	32.6471
0.06751	16.1	0.0685	32.6397
0.06751	16.0625	0.06809	32.6324
0.05781	14.0625	0.05848	28.1323
0.05773	14.0125	0.05802	28.0956
0.05765	13.9625	0.05848	27.8529
0.05758	13.9375	0.05848	27.9265
0.05812	13.9125	0.05781	27.8603
0.04788	11.8125	0.04822	23.7721
0.04788	11.75	0.04863	23.5147
0.04771	11.7	0.04863	23.4338
0.04766	11.6625	0.04771	23.5588
0.04762	11.6375	0.04863	23.5294
0.03765	9.4	0.03776	18.8456
0.03765	9.35	0.03776	18.5809
0.03765	9.3125	0.03744	18.5809
0.03765	9.275	0.03776	18.6471
0.03714	9.25	0.03748	18.5809
0.02787	7.1625	0.02806	14.125
0.02768	7.1	0.02791	13.9779
0.02768	7.05	0.02806	13.8603
0.02768	7	0.02779	14.0588
0.02768	6.975	0.02806	13.8456
0.01795	4.7125	0.0179	9.40441
0.01775	4.65	0.01839	9.34559
0.01755	4.6125	0.01778	9.25735
0.01753	4.575	0.01839	8.94118
0.01753	4.55	0.01839	9.45588
0.00821	2.3125	0.00834	4.38971
0.00803	2.25	0.00783	4.27206
0.00785	2.2125	0.00834	4.19853
0.00782	2.175	0.0077	4.16176
0.00782	2.15	0.00834	4.13235
-0.00112	0.02936	-0.0013	-0.32507
-0.00129	-0.04288	-0.000840764	-0.49553
-0.00145	-0.09643	-0.00149	-0.47495
-0.00162	-0.13656	-0.000840764	-0.51339
-0.000443487	-0.17211	-0.00174	-0.55536
-0.01099	-2.425	-0.01176	-5.25735
-0.01118	-2.475	-0.01176	-5.48529
-0.01125	-2.525	-0.01214	-5.65441
-0.01125	-2.575	-0.01176	-5.83088
-0.01125	-2.6	-0.01217	-5.56618
-0.02071	-4.85	-0.02176	-10.125
-0.02089	-4.9125	-0.02159	-10.2206
-0.021	-4.9625	-0.02159	-10.1324
-0.021	-5	-0.0223	-10.4118
-0.021	-5.0375	-0.02159	-10.4632
-0.03073	-7.275	-0.03192	-15.0588
-0.03093	-7.325	-0.03217	-15.1765
-0.03103	-7.375	-0.03192	-15.2868
-0.03103	-7.425	-0.03232	-15.0074
-0.03103	-7.45	-0.03192	-15.1985
-0.04018	-9.625	-0.04173	-19.6397
-0.04033	-9.675	-0.04118	-19.7794
-0.04048	-9.7125	-0.04118	-19.9706
-0.04054	-9.75	-0.04215	-20.0882
-0.04054	-9.7875	-0.04118	-19.9044
-0.0501	-11.9625	-0.05217	-24.6691
-0.05075	-12.0375	-0.05217	-24.7353
-0.05091	-12.0875	-0.05266	-24.7279
-0.05107	-12.125	-0.05217	-24.8235
-0.05124	-12.1625	-0.05263	-25.2279
-0.06064	-14.325	-0.06186	-29.3529
-0.06064	-14.375	-0.0627	-29.5
-0.06064	-14.425	-0.06186	-29.5956
-0.06098	-14.45	-0.06248	-29.625
-0.06104	-14.475	-0.06186	-29.6544
-0.07065	-16.4875	-0.07211	-34.0515
-0.07065	-16.5375	-0.07252	-34.2279
-0.07065	-16.575	-0.07211	-34.1691
-0.07065	-16.6	-0.07211	-34.2941
-0.07106	-16.625	-0.07245	-34.3971
-0.08051	-18.4875	-0.08182	-38.2279
-0.08075	-18.5375	-0.08247	-38.375
-0.08084	-18.5875	-0.08182	-38.4412
-0.08084	-18.625	-0.08261	-38.4706
-0.08084	-18.6625	-0.08182	-38.375
-0.08934	-19.6375	-0.0923	-42.6912
-0.0899	-20.025	-0.09195	-42.7059
-0.09047	-20.25	-0.09249	-42.7353
-0.09058	-20.4125	-0.09195	-42.8088
-0.09058	-20.5	-0.09195	-42.7279
-0.09984	-22.4625	-0.10228	-46.4853
-0.10035	-22.5125	-0.10239	-46.875
-0.10047	-22.55	-0.10228	-46.9044
-0.1006	-22.5625	-0.10228	-47.0588
-0.10072	-22.575	-0.10254	-46.7941
-0.10046	-22.6375	-0.1028	-46.9265
-0.10046	-22.6375	-0.10261	-46.9412
-0.10062	-22.6375	-0.10261	-46.9412
-0.10066	-22.65	-0.10263	-46.9265
-0.1007	-22.65	-0.10261	-46.9265
-0.12857	-27.5375	-0.13185	-57.9265
-0.12938	-27.6375	-0.1324	-58.1103
-0.12958	-27.7125	-0.13185	-58.1103
-0.12978	-27.75	-0.13223	-58.1324
-0.12997	-27.8	-0.13185	-58.25
-0.15864	-32.225	-0.16187	-68.8529
-0.15887	-32.2875	-0.16187	-68.8015
-0.15909	-32.35	-0.162	-68.9265
-0.1592	-32.3875	-0.16187	-68.9559
-0.1592	-32.4125	-0.16232	-68.6618
-0.18769	-36.2	-0.1914	-78.0147
-0.18806	-36.2875	-0.19089	-78.3603
-0.18838	-36.3375	-0.19145	-78.4265
-0.18838	-36.375	-0.19089	-78.5735
-0.18838	-36.4125	-0.19089	-78.0368
-0.21772	-39.8	-0.22045	-86.1176
-0.21785	-39.85	-0.2215	-86.1471
-0.21785	-39.8875	-0.22045	-86.5735
-0.21785	-39.925	-0.22143	-86.25
-0.21785	-39.95	-0.22045	-86.1471
-0.2471	-42.85	-0.25098	-93.4412
-0.2471	-42.9125	-0.25128	-93.6176
-0.2471	-42.95	-0.25098	-93.4779
-0.2471	-42.9875	-0.25098	-93.4926
-0.24757	-43.0125	-0.2513	-93.6029
-0.27555	-45.4625	-0.2806	-100.051
-0.27555	-45.5875	-0.2806	-100.184
-0.27625	-45.6625	-0.28115	-100.103
-0.27639	-45.7	-0.2806	-100.301
-0.27654	-45.7375	-0.28107	-100.375
-0.30458	-48.05	-0.31052	-105.625
-0.30571	-48.0875	-0.30994	-105.272
-0.30594	-48.125	-0.31077	-105.846
-0.30617	-48.1375	-0.30994	-105.831
-0.30458	-48.15	-0.30994	-105.993
-0.33487	-50.225	-0.33977	-111.235
-0.33513	-50.25	-0.33912	-111.338
-0.33539	-50.275	-0.33912	-111.346
-0.33541	-50.2875	-0.34017	-111.353
-0.33541	-50.3	-0.33912	-111.331
-0.36451	-52.15	-0.36933	-116.118
-0.36451	-52.175	-0.36974	-116.176
-0.36451	-52.1875	-0.36933	-116.081
-0.36451	-52.2	-0.36933	-116.081
-0.36451	-52.2125	-0.3699	-116.081
-0.39327	-53.8875	-0.39895	-120
-0.39327	-53.9	-0.39798	-120.096
-0.39327	-53.925	-0.39926	-120.176
-0.39388	-53.9375	-0.39798	-120.257
-0.39401	-53.95	-0.39798	-120.184
-0.42225	-55.4625	-0.42872	-123.787
-0.42225	-55.4875	-0.42836	-123.721
-0.42305	-55.5	-0.42836	-123.875
-0.42322	-55.5125	-0.42896	-124.022
-0.42338	-55.525	-0.42836	-124.007
-0.45216	-56.9125	-0.45861	-127.397
-0.45246	-56.95	-0.45848	-127.375
-0.45276	-56.9625	-0.45888	-127.353
-0.45082	-56.9625	-0.45903	-127.507
-0.45082	-56.975	-0.45848	-127.662
-0.48149	-58.2125	-0.48777	-130.61
-0.48207	-58.2375	-0.48894	-130.713
-0.48236	-58.2625	-0.48777	-130.596
-0.48236	-58.2625	-0.48861	-130.853
-0.48236	-58.275	-0.48777	-130.934
-0.51153	-59.45	-0.51819	-133.412
-0.51153	-59.475	-0.51844	-133.507
-0.51153	-59.4875	-0.51819	-133.706
-0.51153	-59.4875	-0.51819	-133.647
-0.51193	-59.5	-0.51874	-133.728
-0.53988	-60.4375	-0.54812	-136.118
-0.53988	-60.5	-0.54638	-136.184
-0.53988	-60.55	-0.54824	-136.184
-0.54058	-60.575	-0.54638	-136.147
-0.54075	-60.5875	-0.54638	-136.147
-0.56998	-61.625	-0.57802	-138.787
-0.57053	-61.6375	-0.57786	-138.956
-0.57066	-61.65	-0.57786	-138.507
-0.5708	-61.65	-0.57835	-138.485
-0.57093	-61.6625	-0.57786	-138.596
-0.59975	-62.625	-0.60783	-141.051
-0.59992	-62.6375	-0.60818	-140.868
-0.6001	-62.6375	-0.60783	-141.044
-0.5989	-62.65	-0.60822	-140.985
-0.5989	-62.65	-0.60783	-141.044
-0.62986	-63.5375	-0.63841	-142.875
-0.63025	-63.55	-0.63841	-142.618
-0.63025	-63.5625	-0.63861	-142.757
-0.63025	-63.575	-0.63841	-142.713
-0.63025	-63.575	-0.63894	-142.978
-0.65965	-64.3875	-0.66854	-144.699
-0.65965	-64.4	-0.66855	-144.757
-0.65965	-64.425	-0.66871	-144.515
-0.66008	-64.425	-0.66855	-145.434
-0.66018	-64.4375	-0.6689	-145.676
-0.68898	-65.2125	-0.69853	-146.654
-0.68975	-65.2375	-0.69706	-146.625
-0.68994	-65.2375	-0.69854	-146.507
-0.69012	-65.25	-0.69706	-146.324
-0.69031	-65.2375	-0.69706	-146.463
-0.71885	-65.975	-0.72811	-148.022
-0.71908	-65.9875	-0.72811	-148.36
-0.7193	-66	-0.72875	-147.816
-0.71779	-66.0125	-0.72811	-148.029
-0.71779	-66.0125	-0.72878	-148.132
-0.7491	-66.7375	-0.75927	-149.794
-0.74952	-66.7375	-0.75805	-149.801
-0.74952	-66.75	-0.75918	-149.904
-0.74952	-66.75	-0.75805	-149.956
-0.74952	-66.7625	-0.75934	-149.926
-0.7791	-67.4375	-0.78913	-151.176
-0.7791	-67.45	-0.78795	-151.169
-0.7791	-67.4625	-0.78905	-151.176
-0.7791	-67.45	-0.78935	-151.316
-0.77963	-67.45	-0.78795	-151.324
-0.80834	-68.0625	-0.81882	-152.618
-0.80834	-68.075	-0.81928	-152.507
-0.80834	-68.0875	-0.81882	-152.39
-0.80897	-68.0875	-0.8193	-152.272
-0.80911	-68.0875	-0.81882	-152.294
-0.83761	-68.7125	-0.84888	-153.419
-0.83761	-68.7125	-0.84922	-153.507
-0.83858	-68.7125	-0.84888	-153.279
-0.8388	-68.7125	-0.84888	-153.243
-0.83902	-68.725	-0.84969	-153.36
-0.86674	-69.3625	-0.8793	-155.015
-0.86809	-69.35	-0.87823	-155.029
-0.86836	-69.3375	-0.87919	-154.971
-0.86863	-69.3375	-0.87823	-155.007
-0.86674	-69.3375	-0.87823	-155
-0.89727	-69.9	-0.90822	-156.015
-0.89759	-69.9125	-0.90876	-156.081
-0.89781	-69.925	-0.90822	-156.088
-0.89781	-69.925	-0.90893	-156.081
-0.89781	-69.9125	-0.90822	-156.074
-0.92647	-70.4625	-0.93813	-156.868
-0.92647	-70.475	-0.93828	-156.603
-0.92647	-70.475	-0.93813	-156.346
-0.92647	-70.4875	-0.93813	-156.993
-0.92687	-70.4875	-0.93871	-157.118
-0.95478	-70.975	-0.96716	-158.25
-0.95478	-70.9875	-0.96716	-158.191
-0.95548	-71.0125	-0.96746	-158.14
-0.95564	-71.025	-0.96716	-158.132
-0.95579	-71.0125	-0.96716	-158.11
-0.98345	-71.525	-0.9958	-159.125
-0.98371	-71.525	-0.99513	-158.985
-0.98399	-71.525	-0.99513	-159.096
-0.9822	-71.5375	-0.99602	-158.235
-0.9822	-71.5375	-0.99513	-158.985
-0.95611	-71.0625	-0.9674	-158
-0.95579	-71.0375	-0.96717	-157.978
-0.95579	-71.0375	-0.9674	-157.941
-0.95579	-71.025	-0.9674	-158
-0.95579	-71.025	-0.9672	-158.301
-0.92676	-70.5125	-0.93818	-157.037
-0.92676	-70.5	-0.93818	-157.213
-0.92676	-70.5	-0.93821	-156.419
-0.92676	-70.4875	-0.93818	-156.912
-0.92682	-70.475	-0.93779	-157.044
-0.89766	-69.95	-0.90859	-155.706
-0.89766	-69.9375	-0.90887	-155.765
-0.89766	-69.9125	-0.90817	-155.529
-0.89733	-69.9	-0.90887	-156.125
-0.89726	-69.9125	-0.90887	-156.14
-0.86833	-69.3375	-0.87882	-155.103
-0.86781	-69.325	-0.87923	-154.61
-0.86769	-69.3	-0.87923	-154.794
-0.86758	-69.3	-0.87867	-154.721
-0.86746	-69.3	-0.87923	-154.581
-0.83856	-68.725	-0.84886	-153.353
-0.83838	-68.725	-0.84859	-153.463
-0.8382	-68.7125	-0.84886	-153.419
-0.83812	-68.7	-0.84847	-153.493
-0.83812	-68.7	-0.84886	-153.588
-0.80837	-68.1	-0.81851	-152.301
-0.8081	-68.0875	-0.81852	-152.522
-0.8081	-68.075	-0.81851	-152.765
-0.8081	-68.0625	-0.81851	-152.25
-0.8081	-68.075	-0.81807	-152.191
-0.77823	-67.4375	-0.7886	-151.015
-0.77823	-67.4375	-0.78905	-151.022
-0.77823	-67.4125	-0.78833	-151.029
-0.77823	-67.4	-0.78905	-151.015
-0.77812	-67.4	-0.78828	-151.015
-0.74874	-66.725	-0.758	-149.912
-0.74874	-66.7125	-0.75882	-149.757
-0.74822	-66.7	-0.75825	-149.625
-0.7481	-66.6875	-0.75882	-149.765
-0.74798	-66.6875	-0.75882	-149.485
-0.71959	-66	-0.72799	-148.022
-0.71878	-65.9875	-0.72766	-148.11
-0.71859	-65.9625	-0.72799	-147.926
-0.7184	-65.9625	-0.72747	-147.831
-0.71821	-65.95	-0.72799	-148.051
-0.68883	-65.225	-0.69745	-146.353
-0.68861	-65.2	-0.69763	-146.434
-0.68838	-65.1875	-0.69763	-146.522
-0.68995	-65.175	-0.69756	-146.213
-0.68995	-65.15	-0.69763	-146.14
-0.65925	-64.4125	-0.66788	-144.787
-0.65883	-64.3875	-0.66765	-144.772
-0.65857	-64.375	-0.66788	-144.691
-0.65857	-64.3625	-0.66788	-144.919
-0.65857	-64.35	-0.66741	-144.971
-0.62875	-63.5125	-0.6375	-142.853
-0.62875	-63.4875	-0.6375	-142.816
-0.62875	-63.4625	-0.6374	-142.75
-0.62875	-63.4625	-0.6375	-142.75
-0.62871	-63.45	-0.63707	-142.75
-0.5995	-62.575	-0.60732	-140.713
-0.5995	-62.5625	-0.60809	-140.676
-0.5995	-62.55	-0.60809	-140.691
-0.599	-62.5375	-0.60699	-140.699
-0.59888	-62.525	-0.60809	-140.765
-0.56993	-61.6	-0.5774	-138.507
-0.56945	-61.5875	-0.57678	-138.463
-0.56934	-61.5625	-0.5774	-138.375
-0.56923	-61.55	-0.57679	-138.382
-0.56913	-61.5375	-0.5774	-138.551
-0.53999	-60.575	-0.54717	-135.926
-0.53976	-60.55	-0.54717	-136.125
-0.53953	-60.525	-0.54654	-136.051
-0.5393	-60.5	-0.54717	-135.934
-0.54098	-60.4875	-0.54681	-136.11
-0.51025	-59.4	-0.51716	-133.206
-0.50989	-59.3875	-0.51754	-133.441
-0.50971	-59.375	-0.51696	-133.324
-0.50971	-59.35	-0.51754	-133.324
-0.50971	-59.35	-0.51754	-133.654
-0.481	-58.2125	-0.4875	-130.596
-0.48058	-58.175	-0.48791	-130.522
-0.48058	-58.15	-0.48791	-130.471
-0.48058	-58.1375	-0.48713	-130.581
-0.48058	-58.1125	-0.48791	-130.537
-0.45108	-56.8625	-0.45758	-127.39
-0.45108	-56.8375	-0.45724	-127.294
-0.45108	-56.825	-0.45758	-127.287
-0.45108	-56.8	-0.45728	-127.257
-0.45067	-56.7875	-0.45758	-127.397
-0.42208	-55.4125	-0.42737	-123.941
-0.42208	-55.4	-0.42767	-123.794
-0.42208	-55.375	-0.42767	-123.544
-0.42165	-55.375	-0.42734	-123.904
-0.42155	-55.35	-0.42767	-124.015
-0.39291	-53.8	-0.39793	-120.059
-0.39228	-53.7625	-0.39757	-120.037
-0.39215	-53.7375	-0.39793	-119.941
-0.39201	-53.725	-0.39744	-119.926
-0.39291	-53.7125	-0.39793	-119.926
-0.36286	-52.0375	-0.36782	-115.89
-0.36255	-52.0125	-0.36779	-115.853
-0.36228	-51.9875	-0.36782	-115.824
-0.36228	-51.9625	-0.36782	-115.875
-0.36228	-51.975	-0.36775	-115.559
-0.33387	-50.15	-0.33812	-110.949
-0.33345	-50.1125	-0.33878	-110.912
-0.33341	-50.075	-0.33792	-111.066
-0.33341	-50.05	-0.33878	-110.787
-0.33341	-50.0375	-0.33878	-110.728
-0.3041	-47.975	-0.30897	-105.654
-0.30398	-47.925	-0.30842	-105.522
-0.30398	-47.8875	-0.30897	-105.544
-0.30398	-47.8625	-0.30814	-105.566
-0.30398	-47.85	-0.30897	-105.309
-0.27448	-45.55	-0.27903	-99.9485
-0.27448	-45.4875	-0.27866	-99.7206
-0.27448	-45.45	-0.27903	-99.6471
-0.27415	-45.425	-0.27903	-99.6618
-0.27407	-45.4125	-0.27855	-99.6618
-0.24549	-42.8125	-0.24856	-93.4265
-0.24549	-42.75	-0.24856	-93.2426
-0.24549	-42.7125	-0.24861	-93.0588
-0.24488	-42.675	-0.24856	-92.9706
-0.24475	-42.65	-0.24838	-92.9926
-0.21607	-39.6375	-0.21897	-86
-0.2154	-39.5875	-0.21933	-85.4779
-0.21525	-39.5625	-0.21852	-85.3456
-0.2151	-39.525	-0.21933	-85.6397
-0.21495	-39.5125	-0.21871	-85.5441
-0.18609	-36.1625	-0.18897	-77.2206
-0.18586	-36.0875	-0.18941	-77.125
-0.18563	-36.0125	-0.18941	-77.1397
-0.1854	-35.9625	-0.18874	-76.8971
-0.18707	-35.9375	-0.18941	-77.1397
-0.15673	-32.1	-0.1598	-67.8529
-0.15644	-32.0125	-0.15893	-67.6618
-0.15615	-31.95	-0.1598	-67.7132
-0.15813	-31.9125	-0.15882	-67.6618
-0.15813	-31.875	-0.1598	-67.7647
-0.12698	-27.3875	-0.12916	-57.5956
-0.12665	-27.3125	-0.12881	-57.1471
-0.12665	-27.2625	-0.12916	-57.1176
-0.12665	-27.2125	-0.12895	-56.9853
-0.12665	-27.175	-0.12916	-56.9412
-0.09691	-22.0125	-0.0991	-45.4706
-0.09691	-21.925	-0.0991	-45.2206
-0.09691	-21.8625	-0.09871	-45.1691
-0.09691	-21.8	-0.0991	-45.3382
-0.09649	-21.775	-0.09873	-45.1397
-0.08708	-19.925	-0.08895	-41.375
-0.0869	-19.875	-0.0891	-41.2279
-0.08686	-19.825	-0.0891	-41.2426
-0.08686	-19.8	-0.08853	-41.3824
-0.08686	-19.7875	-0.0891	-41.4044
-0.07724	-17.9125	-0.07861	-36.9191
-0.07712	-17.85	-0.07903	-36.6985
-0.077	-17.8125	-0.07851	-36.6471
-0.07688	-17.7875	-0.07903	-36.3897
-0.07773	-17.7625	-0.07861	-36.2574
-0.06743	-15.8125	-0.0687	-32.3971
-0.06743	-15.7625	-0.06853	-32.0735
-0.06743	-15.7125	-0.0687	-32.0294
-0.06685	-15.675	-0.0687	-32.1103
-0.06674	-15.6625	-0.06852	-32.1029
-0.05711	-13.6125	-0.05875	-27.9485
-0.05711	-13.575	-0.05886	-27.4412
-0.05711	-13.5375	-0.05868	-27.6765
-0.05711	-13.5	-0.05886	-27.6691
-0.05709	-13.4875	-0.05886	-27.5809
-0.04736	-11.4125	-0.04883	-22.9706
-0.04718	-11.35	-0.04883	-22.9412
-0.04711	-11.3	-0.0487	-23.0515
-0.04711	-11.2625	-0.04883	-22.9118
-0.04711	-11.2375	-0.04864	-22.8677
-0.03723	-9.0625	-0.0386	-18.4412
-0.03712	-8.9875	-0.03835	-18.0809
-0.03701	-8.9375	-0.0386	-18.3823
-0.03689	-8.9	-0.03833	-18.2353
-0.03769	-8.8625	-0.0386	-18.1323
-0.02799	-6.7625	-0.02843	-13.6985
-0.02799	-6.7	-0.02862	-13.75
-0.02799	-6.65	-0.02824	-13.5221
-0.02751	-6.6125	-0.02862	-13.3235
-0.02742	-6.575	-0.02862	-13.1397
-0.0177	-4.3875	-0.01851	-8.88235
-0.0177	-4.3125	-0.01844	-8.83824
-0.0177	-4.25	-0.01851	-8.43382
-0.0177	-4.2125	-0.01851	-8.20588
-0.01739	-4.175	-0.01831	-8.39706
-0.00781	-1.9375	-0.00895	-3.78676
-0.00779	-1.875	-0.00895	-3.89706
-0.00779	-1.825	-0.00837	-3.89706
-0.00779	-1.7875	-0.00895	-3.5
-0.00779	-1.75	-0.00833	-3.38235
0.00141	0.3537	0.000664193	0.83824
0.00168	0.4229	0.00101	0.95588
0.00174	0.47588	0.000664193	1.02206
0.00174	0.52197	0.000664193	1.11029
0.00174	0.55526	0.00153	1.09559
0.01082	2.725	0.01113	5.90441
0.01082	2.8	0.01149	6.01471
0.01082	2.8625	0.01113	6.10294
0.01082	2.9	0.0115	6.08088
0.01144	2.9375	0.01113	6.34559
0.02065	5.2	0.02107	10.7794
0.02065	5.25	0.02137	10.9044
0.02065	5.3	0.02107	10.7794
0.02104	5.35	0.02107	10.7574
0.02114	5.375	0.02158	11.125
0.03099	7.6125	0.03161	15.6691
0.03099	7.675	0.03161	15.7794
0.03099	7.7125	0.03145	15.7132
0.03122	7.75	0.03161	15.9485
0.03128	7.775	0.03161	16.0368
0.04063	9.875	0.04124	20.3235
0.04088	9.9375	0.04129	20.3162
0.04088	9.9875	0.04124	20.5956
0.04088	10.0375	0.0417	20.7427
0.04088	10.0625	0.04124	20.5294
0.05108	12.325	0.05169	25
0.05122	12.3875	0.05134	25.1838
0.05137	12.425	0.05134	25.3456
0.05139	12.475	0.05219	25.3823
0.05139	12.5	0.05134	25.6029
0.06119	14.5875	0.06181	29.7059
0.06132	14.65	0.06181	29.9779
0.06145	14.6875	0.06202	30.0735
0.06157	14.7125	0.06181	30.1103
0.06065	14.7375	0.0621	30.1397
0.07056	16.7	0.07185	34.1544
0.07056	16.75	0.07204	34.3382
0.07113	16.7875	0.07185	34.4706
0.07127	16.825	0.07199	34.5809
0.0714	16.8625	0.07185	34.6029
0.07977	18.55	0.08216	38.625
0.07977	18.575	0.08175	38.5956
0.07977	18.625	0.08175	38.5662
0.07977	18.675	0.08205	38.6324
0.08043	18.725	0.08175	38.6324
0.09041	20.75	0.09228	43.25
0.09051	20.7875	0.0921	43.4338
0.09051	20.825	0.0921	43.3162
0.09051	20.85	0.09224	43.2279
0.09051	20.8625	0.0921	43.2353
0.10031	22.6	0.10191	47.1176
0.10045	22.6375	0.10148	47.2721
0.10058	22.675	0.10214	47.375
0.10061	22.7125	0.10148	47.4853
0.10061	22.7375	0.10231	47.1838
0.10088	22.8125	0.10239	47.25
0.10091	22.8	0.10234	47.0882
0.10091	22.8	0.10239	47.0221
0.10092	22.8125	0.10239	47.25
0.10093	22.8125	0.10217	47.3088
0.12954	27.65	0.13222	58.8456
0.1298	27.75	0.13222	59.0588
0.13005	27.825	0.13228	58.9706
0.13031	27.875	0.13222	59.0735
0.12844	27.9125	0.13219	58.7794
0.15919	32.325	0.16192	69.1691
0.15953	32.3875	0.16063	69.0956
0.1596	32.4375	0.16192	69.1397
0.1596	32.475	0.16063	69.2868
0.1596	32.5125	0.16063	69.2941
0.18848	36.225	0.19114	77.8824
0.18853	36.3	0.19139	78.0221
0.18853	36.3625	0.19114	78.0368
0.18853	36.4	0.19152	78.5809
0.18853	36.45	0.19114	77.8235
0.21797	39.8125	0.22143	86.2647
0.21797	39.875	0.22143	86.4191
0.21844	39.9125	0.22187	86.4485
0.21855	39.9375	0.22143	86.4779
0.21867	39.9625	0.22159	86.4853
0.24777	42.8875	0.25118	93.6324
0.24801	42.925	0.25012	93.7794
0.24825	42.9625	0.25157	93.9779
0.2485	42.9875	0.25012	94.125
0.24672	43	0.25012	94.2868
0.27711	45.575	0.28112	100.154
0.27753	45.6125	0.28112	100.059
0.2776	45.65	0.28193	100.272
0.2776	45.6625	0.28112	100.324
0.2776	45.6875	0.28196	100.382
0.30677	47.95	0.3102	105.801
0.30684	48	0.31155	105.904
0.30684	48.025	0.3102	105.75
0.30684	48.0375	0.31166	105.904
0.30684	48.05	0.3102	106.287
0.33607	50.075	0.34152	111.331
0.33607	50.125	0.34152	111.294
0.33607	50.15	0.34172	111.125
0.33645	50.175	0.34152	111.169
0.33655	50.2	0.34178	111.132
0.36492	52.0125	0.36478	116.103
0.36492	52.05	0.40053	120.287
0.36562	52.0625	0.40127	120.279
0.36578	52.0875	0.40053	120.404
0.36595	52.1	0.40115	120.382
0.39492	53.75	0.40053	120.287
0.39514	53.7875	0.43095	124.066
0.39536	53.8125	0.4312	124.132
0.39559	53.825	0.43095	124.213
0.39478	53.8375	0.43095	124.515
0.4243	55.325	0.4313	124.096
0.42468	55.3625	0.46083	127.654
0.42507	55.375	0.46083	127.662
0.42519	55.3875	0.46094	127.581
0.42519	55.3875	0.46083	127.559
0.4546	56.7625	0.46093	127.551
0.45468	56.7875	0.49087	130.103
0.45468	56.8125	0.49043	130.338
0.45468	56.8375	0.49106	130.721
0.45468	56.8375	0.49043	130.478
0.48393	58.05	0.49043	130.566
0.48393	58.0875	0.52051	133.676
0.48393	58.1125	0.52083	133.544
0.48393	58.125	0.52004	133.368
0.48443	58.1375	0.52121	133.684
0.51269	59.175	0.52004	133.529
0.51313	59.25	0.55045	136.088
0.51313	59.3	0.55077	136.221
0.51313	59.3375	0.55045	136.221
0.51313	59.3375	0.55102	136.213
0.54197	59.9625	0.55045	136.176
0.54197	60.2	0.58107	139.051
0.54197	60.3125	0.58107	138.853
0.54197	60.375	0.58129	138.787
0.5425	60.4125	0.58107	138.757
0.57206	61.5	0.58115	138.735
0.57206	61.5	0.61132	140.757
0.57256	61.5	0.61116	140.978
0.57267	61.5	0.61112	140.816
0.57277	61.5	0.6111	141.059
0.60086	62.4125	0.61116	140.368
0.6016	62.425	0.6403	143.015
0.60176	62.425	0.6411	143.044
0.60193	62.4375	0.6403	143.029
0.60086	62.4375	0.6413	142.684
0.63146	63.3375	0.6403	142.551
0.63178	63.3375	0.67017	145.037
0.63211	63.35	0.6708	145.044
0.63216	63.3625	0.67017	145.154
0.63216	63.3625	0.67121	145.191
0.66073	64.1875	0.67017	145.029
0.66136	64.175	0.70102	145.728
0.66141	64.175	0.69818	146.154
0.66141	64.175	0.70089	146.669
0.66141	64.175	0.69818	146.787
0.69095	64.9625	0.69818	146.882
0.69095	64.975	0.72986	148.331
0.69095	64.9875	0.72986	148.338
0.69095	65	0.7307	148.456
0.69123	65	0.72986	148.434
0.7198	65.7125	0.73061	148.309
0.7198	65.7375	0.76008	149.684
0.7198	65.75	0.75922	149.868
0.72057	65.75	0.76048	149.809
0.72072	65.7625	0.75922	149.787
0.74831	66.45	0.76016	149.456
0.74926	66.475	0.78993	151.434
0.74945	66.4875	0.78926	151.551
0.74965	66.5	0.78926	151.375
0.74831	66.4875	0.79018	151.331
0.77847	67.175	0.78926	151.324
0.77884	67.1875	0.8189	152.853
0.7792	67.1875	0.82	152.816
0.77936	67.1875	0.8189	152.89
0.77936	67.2	0.81992	152.831
0.80796	68.025	0.8189	152.816
0.80811	67.9375	0.84855	153.713
0.80811	67.9	0.84895	153.816
0.80811	67.875	0.84855	153.846
0.80811	67.8625	0.84855	153.787
0.83718	68.5	0.84952	153.787
0.83718	68.5	0.87783	154.993
0.83718	68.5	0.87716	154.978
0.83718	68.4875	0.87837	154.89
0.83756	68.4875	0.87716	154.831
0.86556	69.075	0.87716	155.007
0.86611	69.075	0.90673	156.051
0.86626	69.075	0.906	156.037
0.8664	69.075	0.906	156.051
0.86654	69.075	0.90739	156.132
0.89442	69.6375	0.906	156.051
0.8947	69.6625	0.93486	157.184
0.89499	69.6625	0.93597	157.213
0.89307	69.6625	0.93486	157.221
0.89307	69.6625	0.93591	157.199
0.92319	70.2	0.93486	157.353
0.92355	70.2	0.9637	157.956
0.92355	70.2125	0.96444	157.971
0.92355	70.2125	0.9637	157.956
0.92355	70.2125	0.9637	157.897
0.9509	70.75	0.96445	158.147
0.9509	70.7625	1.00171	159.412
0.9509	70.7625	1.00093	159.346
0.95155	70.7625	1.00181	159.044
0.95169	70.775	1.00093	159.375
0.97824	71.3	1.00182	158.868
0.97899	71.3	--	--
0.97915	71.3	--	--
0.97932	71.3	--	--
0.97824	71.3	--	--
