# Supplementary material for: Cork-derived magnetic composites: a preliminary study
Source: Royal Society of Chemistry journal article supplement (doi:10.1039/d4su00442f), 2024-12-11
Supplement: d4su00442f2.xlsx [file d4su00442f2.xlsx]

## Sheet: Figure 2a
FC1_N2		FC1_O2
50.0259	2.1879	50.0259	1.39397
50.9901	2.11276	50.9901	1.28413
51.9543	2.05755	51.9543	1.2443
52.9186	1.99375	52.9186	1.21113
53.8828	1.89442	53.8828	1.13757
54.8471	1.76287	54.8471	1.02636
55.8113	1.6481	55.8113	0.93586
56.7755	1.58528	56.7755	0.92278
57.7398	1.54763	57.7398	0.96255
58.704	1.49394	58.704	0.96917
59.6682	1.38717	59.6682	0.89515
60.6324	1.26492	60.6324	0.78121
61.5967	1.18481	61.5967	0.69017
62.5609	1.14815	62.5609	0.62325
63.5251	1.12386	63.5251	0.56774
64.4894	1.10158	64.4894	0.51939
65.4536	1.09132	65.4536	0.49567
66.4179	1.06567	66.4179	0.46953
67.3821	0.99882	67.3821	0.41916
68.3463	0.89214	68.3463	0.34443
69.3106	0.782801	69.3106	0.26749
70.2748	0.662897	70.2748	0.19001
71.239	0.55507	71.239	0.1192
72.2032	0.490848	72.2032	0.07456
73.1675	0.500687	73.1675	0.07042
74.1317	0.549814	74.1317	0.09193
75.096	0.594422	75.096	0.11995
76.0602	0.642127	76.0602	0.15761
77.0244	0.679438	77.0244	0.20252
77.9887	0.683636	77.9887	0.25021
78.9529	0.652031	78.9529	0.30349
79.9171	0.616449	79.9171	0.33314
80.8813	0.619761	80.8813	0.32091
81.8456	0.65284	81.8456	0.27192
82.8098	0.625314	82.8098	0.21022
83.7741	0.446157	83.7741	0.14213
84.7383	0.208403	84.7383	0.06448
85.7025	0.0610173	85.7025	-0.02225
86.6667	0.0768669	86.6667	-0.14461
87.631	0.160238	87.631	-0.26523
88.5952	0.214629	88.5952	-0.33169
89.5594	0.245558	89.5594	-0.32649
90.5237	0.249629	90.5237	-0.28484
91.4879	0.209069	91.4879	-0.23464
92.4522	0.126686	92.4522	-0.16688
93.4164	0.0386426	93.4164	-0.14571
94.3806	-0.0545703	94.3806	-0.25414
95.3448	-0.144772	95.3448	-0.44915
96.3091	-0.205236	96.3091	-0.56475
97.2733	-0.22556	97.2733	-0.49718
98.2375	-0.215532	98.2375	-0.29916
99.2018	-0.197586	99.2018	-0.19312
100.166	-0.168311	100.166	-0.26668
101.13	-0.129466	101.13	-0.3745
102.094	-0.0680632	102.094	-0.37695
103.059	0.0167334	103.059	-0.25935
104.023	0.0685661	104.023	-0.14343
104.987	0.0272884	104.987	-0.17751
105.951	-0.0915104	105.951	-0.38854
106.916	-0.187371	106.916	-0.5287
107.88	-0.213227	107.88	-0.49685
108.844	-0.214427	108.844	-0.37083
109.808	-0.27389	109.808	-0.28781
110.773	-0.42909	110.773	-0.30339
111.737	-0.606563	111.737	-0.37671
112.701	-0.675356	112.701	-0.38758
113.665	-0.572744	113.665	-0.26218
114.629	-0.475194	114.629	-0.15522
115.594	-0.483905	115.594	-0.17514
116.558	-0.582297	116.558	-0.30794
117.522	-0.679876	117.522	-0.43715
118.487	-0.725485	118.487	-0.46212
119.451	-0.709427	119.451	-0.34168
120.415	-0.663	120.415	-0.24611
121.379	-0.509142	121.379	-0.14058
122.343	-0.36465	122.343	-0.0752
123.308	-0.36506	123.308	-0.13629
124.272	-0.54133	124.272	-0.35859
125.236	-0.76474	125.236	-0.63741
126.2	-0.835133	126.2	-0.72882
127.165	-0.640089	127.165	-0.41274
128.129	-0.504222	128.129	-0.16897
129.093	-0.514385	129.093	-0.104
130.057	-0.620067	130.057	-0.17857
131.022	-0.742096	131.022	-0.32111
131.986	-0.849957	131.986	-0.50115
132.95	-0.940935	132.95	-0.72837
133.914	-0.977315	133.914	-0.85478
134.878	-0.912944	134.878	-0.83535
135.843	-0.837046	135.843	-0.76243
136.807	-0.786936	136.807	-0.67808
137.771	-0.768469	137.771	-0.59498
138.735	-0.77248	138.735	-0.51247
139.7	-0.78442	139.7	-0.41863
140.664	-0.782516	140.664	-0.22731
141.628	-0.832126	141.628	-0.14726
142.592	-1.00898	142.592	-0.26
143.556	-1.19355	143.556	-0.4436
144.521	-1.2782	144.521	-0.58576
145.485	-1.22301	145.485	-0.6333
146.449	-1.07554	146.449	-0.59714
147.413	-0.967156	147.413	-0.52779
148.378	-0.927235	148.378	-0.36412
149.342	-0.890647	149.342	-0.21252
150.306	-0.83477	150.306	-0.07013
151.27	-0.781541	151.27	0.04122
152.235	-0.769904	152.235	0.08331
153.199	-0.842146	153.199	-0.00801
154.163	-1.00824	154.163	-0.27605
155.127	-1.10031	155.127	-0.45838
156.092	-1.03097	156.092	-0.48033
157.056	-0.959185	157.056	-0.46993
158.02	-0.959509	158.02	-0.49132
158.984	-1.03476	158.984	-0.56052
159.948	-1.11628	159.948	-0.63779
160.913	-1.10292	160.913	-0.65856
161.877	-0.941462	161.877	-0.5964
162.841	-0.847982	162.841	-0.56089
163.805	-0.876374	163.805	-0.58107
164.77	-0.971246	164.77	-0.64032
165.734	-1.10214	165.734	-0.72696
166.698	-1.28899	166.698	-0.89688
167.662	-1.48163	167.662	-1.09613
168.627	-1.53801	168.627	-1.12856
169.591	-1.37714	169.591	-0.88299
170.555	-1.21187	170.555	-0.62822
171.519	-1.16844	171.519	-0.5849
172.483	-1.21668	172.483	-0.74748
173.448	-1.24985	173.448	-0.89197
174.412	-1.17543	174.412	-0.86131
175.376	-1.02194	175.376	-0.68648
176.34	-0.932323	176.34	-0.5359
177.305	-0.954403	177.305	-0.46199
178.269	-1.02541	178.269	-0.43745
179.233	-1.06844	179.233	-0.39778
180.197	-1.07755	180.197	-0.30366
181.162	-1.07272	181.162	-0.23265
182.126	-1.04513	182.126	-0.24772
183.09	-1.004	183.09	-0.34629
184.054	-1.01934	184.054	-0.47549
185.019	-1.1601	185.019	-0.61137
185.983	-1.39069	185.983	-0.75
186.947	-1.50971	186.947	-0.8414
187.911	-1.42006	187.911	-0.85353
188.875	-1.27875	188.875	-0.83419
189.84	-1.2009	189.84	-0.82031
190.804	-1.19691	190.804	-0.82011
191.768	-1.23057	191.768	-0.8306
192.732	-1.26478	192.732	-0.84584
193.697	-1.28293	193.697	-0.8167
194.661	-1.35038	194.661	-0.86613
195.625	-1.57767	195.625	-1.11171
196.589	-1.80404	196.589	-1.39566
197.554	-1.84127	197.554	-1.52896
198.518	-1.62529	198.518	-1.42166
199.482	-1.27054	199.482	-1.13303
200.446	-1.0511	200.446	-0.90754
201.411	-1.15131	201.411	-0.77569
202.375	-1.19155	202.375	-0.67402
203.339	-1.10066	203.339	-0.59808
204.303	-0.939235	204.303	-0.55132
205.268	-0.798953	205.268	-0.53932
206.232	-0.744989	206.232	-0.58309
207.196	-0.767748	207.196	-0.68738
208.16	-0.728993	208.16	-0.72419
209.124	-0.625133	209.124	-0.63809
210.089	-0.465076	210.089	-0.53447
211.053	-0.272097	211.053	-0.47991
212.017	-0.0292399	212.017	-0.47349
212.981	0.32069	212.981	-0.41166
213.946	0.823848	213.946	-0.18508
214.91	1.47983	214.91	0.21391
215.874	2.26119	215.874	0.66324
216.838	3.26256	216.838	1.09573
217.803	4.34621	217.803	1.59761
218.767	5.44027	218.767	2.26434
219.731	6.56179	219.731	3.16338
220.695	7.59759	220.695	4.17543
221.659	8.39742	221.659	5.25638
222.624	8.94716	222.624	6.41786
223.588	9.48483	223.588	7.43371
224.552	10.4062	224.552	8.26585
225.516	11.3819	225.516	8.8719
226.481	11.4856	226.481	8.84598
227.445	10.0563	227.445	7.70907
228.409	8.03186	228.409	6.13053
229.373	6.10978	229.373	4.6934
230.338	4.33384	230.338	3.48578
231.302	2.84761	231.302	2.50392
232.266	1.80473	232.266	1.74706
233.23	1.35194	233.23	1.3338
234.195	0.988781	234.195	0.97563
235.159	0.699447	235.159	0.6327
236.123	0.500379	236.123	0.3559
237.087	0.432772	237.087	0.21693
238.051	0.509181	238.051	0.25051
239.016	0.667189	239.016	0.40689
239.98	0.788691	239.98	0.5412
240.944	0.8688	240.944	0.68142
241.908	0.910633	241.908	0.75732
242.873	0.921004	242.873	0.73642
243.837	0.889481	243.837	0.64487
244.801	0.796006	244.801	0.52084
245.765	0.61953	245.765	0.38307
246.73	0.382956	246.73	0.23221
247.694	0.175973	247.694	0.06416
248.658	0.00192383	248.658	-0.17669
249.622	-0.12954	249.622	-0.34698
250.586	-0.210729	250.586	-0.36294
251.551	-0.254633	251.551	-0.24036
252.515	-0.291435	252.515	-0.09889
253.479	-0.363416	253.479	0.00155
254.443	-0.448379	254.443	0.06364
255.408	-0.447191	255.408	0.09639
256.372	-0.310964	256.372	0.09478
257.336	-0.142807	257.336	0.06858
258.3	-0.036049	258.3	0.03801
259.264	0.0116056	259.264	0.01565
260.229	0.0122689	260.229	-0.02739
261.193	-0.081224	261.193	-0.14134
262.157	-0.222103	262.157	-0.2931
263.122	-0.296397	263.122	-0.39165
264.086	-0.259569	264.086	-0.38929
265.05	-0.135693	265.05	-0.29564
266.014	0.00213949	266.014	-0.19293
266.978	0.130452	266.978	-0.10538
267.943	0.297836	267.943	0.01659
268.907	0.546033	268.907	0.23593
269.871	0.840651	269.871	0.50994
270.835	1.10942	270.835	0.72956
271.8	1.29092	271.8	0.77786
272.764	1.39105	272.764	0.62236
273.728	1.62147	273.728	0.6138
274.692	2.08292	274.692	0.89331
275.656	2.59166	275.656	1.21339
276.621	3.0604	276.621	1.47078
277.585	3.51456	277.585	1.65784
278.549	4.06255	278.549	1.84907
279.513	4.81321	279.513	2.05122
280.478	5.76838	280.478	2.26181
281.442	6.77263	281.442	2.71248
282.406	7.77883	282.406	3.53253
283.37	8.86758	283.37	4.57947
284.335	10.0948	284.335	5.65101
285.299	11.4862	285.299	6.71907
286.263	12.9325	286.263	7.84254
287.227	14.4657	287.227	9.17329
288.192	16.0369	288.192	10.6504
289.156	17.4916	289.156	12.0012
290.12	18.8848	290.12	13.1423
291.084	20.0205	291.084	14.0208
292.048	20.2818	292.048	14.2892
293.013	19.2831	293.013	13.7062
293.977	17.9621	293.977	12.8489
294.941	16.4297	294.941	11.8455
295.905	14.8112	295.905	10.7553
296.87	13.3898	296.87	9.68776
297.834	12.392	297.834	8.72797
298.798	11.8274	298.798	7.87851
299.762	11.1416	299.762	7.17142
300.727	10.2933	300.727	6.81067
301.691	9.35219	301.691	6.42964
302.655	8.2752	302.655	5.8352
303.619	7.10381	303.619	5.02138
304.584	5.96358	304.584	4.18364
305.548	4.90869	305.548	3.45606
306.512	3.94379	306.512	2.83936
307.476	3.22548	307.476	2.41883
308.44	2.90883	308.44	2.34602
309.405	2.73626	309.405	2.40685
310.369	2.44927	310.369	2.28558
311.333	1.99829	311.333	1.78709
312.297	1.60747	312.297	1.40183
313.262	1.44561	313.262	1.5406
314.226	1.44706	314.226	2.04778
315.19	1.42544	315.19	2.42526
316.154	1.30961	316.154	2.40839
317.118	1.14103	317.118	2.06775
318.083	1.04379	318.083	1.89445
319.047	1.08554	319.047	2.03132
320.011	1.1159	320.011	2.16955
320.976	1.10097	320.976	2.21896
321.94	1.05255	321.94	2.1963
322.904	0.985979	322.904	2.15233
323.868	0.901346	323.868	2.11761
324.832	0.807769	324.832	2.09167
325.797	0.77317	325.797	2.0747
326.761	0.84502	326.761	2.02608
327.725	0.920278	327.725	2.03098
328.689	0.997126	328.689	2.20312
329.654	1.0607	329.654	2.51537
330.618	1.06833	330.618	2.72173
331.582	0.909053	331.582	2.54578
332.546	0.666035	332.546	2.12432
333.51	0.611598	333.51	1.906
334.475	0.824953	334.475	2.01298
335.439	1.09164	335.439	2.26224
336.403	1.191	336.403	2.39973
337.367	1.10762	337.367	2.38539
338.332	1.02957	338.332	2.38028
339.296	0.978909	339.296	2.42602
340.26	0.950584	340.26	2.48577
341.224	0.952825	341.224	2.50473
342.189	0.988826	342.189	2.45954
343.153	1.02796	343.153	2.38753
344.117	1.01184	344.117	2.3867
345.081	0.88849	345.081	2.54234
346.046	0.796234	346.046	2.6539
347.01	0.718521	347.01	2.64325
347.974	0.678708	347.974	2.58114
348.938	0.716985	348.938	2.5638
349.902	0.872404	349.902	2.665
350.867	1.05378	350.867	2.8161
351.831	1.09428	351.831	2.88201
352.795	0.964651	352.795	2.84866
353.759	0.84652	353.759	2.79642
354.724	0.833269	354.724	2.77261
355.688	0.884543	355.688	2.76805
356.652	0.89809	356.652	2.73149
357.616	0.848917	357.616	2.63007
358.581	0.776107	358.581	2.5223
359.545	0.685173	359.545	2.44933
360.509	0.583156	360.509	2.41159
361.473	0.505093	361.473	2.38772
362.438	0.475104	362.438	2.34469
363.402	0.493611	363.402	2.24192
364.366	0.559269	364.366	2.27274
365.33	0.756553	365.33	2.65074
366.294	0.933717	366.294	3.00325
367.259	1.02355	367.259	3.10755
368.223	1.02641	368.223	2.93463
369.187	0.986408	369.187	2.66957
370.151	0.941318	370.151	2.50231
371.116	0.887551	371.116	2.42131
372.08	0.783111	372.08	2.2266
373.044	0.576966	373.044	1.78611
374.008	0.388235	374.008	1.31185
374.973	0.345078	374.973	1.11929
375.937	0.476882	375.937	1.3666
376.901	0.607303	376.901	1.59589
377.865	0.687273	377.865	1.64446
378.829	0.720411	378.829	1.56084
379.794	0.686598	379.794	1.40877
380.758	0.57169	380.758	1.20358
381.722	0.448013	381.722	0.9836
382.686	0.474471	382.686	0.88004
383.651	0.838105	383.651	0.99212
384.615	1.08548	384.615	1.09442
385.579	1.0878	385.579	1.14351
386.543	0.995589	386.543	1.15326
387.508	0.972482	387.508	1.15075
388.472	1.10194	388.472	1.16489
389.436	1.30019	389.436	1.17322
390.4	1.3922	390.4	1.0815
391.365	1.34515	391.365	0.85392
392.329	1.43107	392.329	0.7337
393.293	1.83533	393.293	0.92855
394.257	2.48655	394.257	1.43673
395.221	3.03109	395.221	1.78487
396.186	3.32959	396.186	1.80353
397.15	3.63086	397.15	1.77964
398.114	4.04821	398.114	1.85079
399.078	4.58145	399.078	2.03744
400.043	5.21374	400.043	2.34598
401.007	5.95152	401.007	2.81631
401.971	6.79441	401.971	3.47747
402.935	7.60921	402.935	4.06658
403.899	8.50773	403.899	4.58738
404.864	9.23717	404.864	5.01042
405.828	9.69104	405.828	5.30225
406.792	9.89102	406.792	5.46544
407.757	9.94805	407.757	5.5856
408.721	9.9416	408.721	5.782
409.685	9.83233	409.685	5.96843
410.649	9.51972	410.649	5.92335
411.613	8.97813	411.613	5.5822
412.578	8.29124	412.578	5.07334
413.542	7.51398	413.542	4.56199
414.506	6.57292	414.506	4.00386
415.47	5.74775	415.47	3.52341
416.435	5.12549	416.435	3.18195
417.399	4.57167	417.399	2.89226
418.363	3.96491	418.363	2.56796
419.327	3.28842	419.327	2.1806
420.291	2.64081	420.291	1.78786
421.256	2.14268	421.256	1.47115
422.22	1.80649	422.22	1.23732
423.184	1.53822	423.184	1.04939
424.148	1.38131	424.148	0.94993
425.113	1.24914	425.113	0.86818
426.077	1.04131	426.077	0.69142
427.041	0.709368	427.041	0.2876
428.005	0.408332	428.005	-0.06041
428.97	0.182135	428.97	-0.22399
429.934	0.0377376	429.934	-0.23726
430.898	0.023234	430.898	-0.14124
431.862	0.172646	431.862	0.06851
432.827	0.395791	432.827	0.34127
433.791	0.464256	433.791	0.46095
434.755	0.224739	434.755	0.28762
435.719	0.0553776	435.719	0.14502
436.683	0.0378019	436.683	0.12467
437.648	0.0951351	437.648	0.17811
438.612	0.143764	438.612	0.22585
439.576	0.153553	439.576	0.22321
440.54	0.145474	440.54	0.20714
441.505	0.153652	441.505	0.23644
442.469	0.1776	442.469	0.31204
443.433	0.170007	443.433	0.37523
444.397	0.0914453	444.397	0.38047
445.362	-0.0434635	445.362	0.32258
446.326	-0.119326	446.326	0.29347
447.29	-0.0367163	447.29	0.38303
448.254	-0.0049528	448.254	0.41684
449.219	-0.173408	449.219	0.24322
450.183	-0.428838	450.183	-0.05267
451.147	-0.551203	451.147	-0.24164
452.111	-0.350763	452.111	-0.06173
453.075	0.0449935	453.075	0.37649
454.04	0.233188	454.04	0.587
455.004	0.168812	455.004	0.51957
455.968	0.0281877	455.968	0.3523
456.932	-0.135721	456.932	0.18683
457.897	-0.309194	457.897	0.02024
458.861	-0.404471	458.861	-0.09317
459.825	-0.367924	459.825	-0.15941
460.789	-0.291156	460.789	-0.17032
461.753	-0.205183	461.753	-0.07469
462.718	-0.122271	462.718	0.11241
463.682	-0.0779321	463.682	0.28288
464.646	-0.123394	464.646	0.28933
465.611	-0.259797	465.611	0.10159
466.575	-0.303613	466.575	0.04994
467.539	-0.183132	467.539	0.26141
468.503	-0.0517057	468.503	0.48719
469.467	-0.00125814	469.467	0.51385
470.432	-0.0185604	470.432	0.31821
471.396	-0.00731852	471.396	0.20874
472.36	0.097618	472.36	0.38105
473.324	0.224771	473.324	0.65663
474.289	0.27956	474.289	0.8039
475.253	0.258822	475.253	0.78344
476.217	0.241178	476.217	0.70878
477.181	0.313145	477.181	0.73615
478.146	0.508654	478.146	0.93371
479.11	0.647546	479.11	1.04302
480.074	0.635133	480.074	0.878
481.038	0.637868	481.038	0.7377
482.002	0.747632	482.002	0.84376
482.967	0.967569	482.967	1.26093
483.931	1.19096	483.931	1.67664
484.895	1.35763	484.895	1.87203
485.859	1.48167	485.859	1.92755
486.824	1.5944	486.824	2.03336
487.788	1.70369	487.788	2.24902
488.752	1.79926	488.752	2.48017
489.716	1.85847	489.716	2.55079
490.68	1.83228	490.68	2.28312
491.645	1.87463	491.645	2.15678
492.609	2.0976	492.609	2.3037
493.573	2.31181	493.573	2.53173
494.538	2.38768	494.538	2.68717
495.502	2.29728	495.502	2.7254
496.466	2.12571	496.466	2.68017
497.43	1.88873	497.43	2.55395
498.394	1.63098	498.394	2.37876
499.359	1.49172	499.359	2.22999
500.323	1.51025	500.323	2.11688
501.287	1.58923	501.287	2.039
502.251	1.60583	502.251	2.01763
503.216	1.56866	503.216	2.19861
504.18	1.46107	504.18	2.2521
505.144	1.20688	505.144	2.09007
506.108	0.93151	506.108	1.82896
507.072	0.73613	507.072	1.56671
508.037	0.647677	508.037	1.32376
509.001	0.589555	509.001	1.12685
509.965	0.49127	509.965	1.03667
510.929	0.364033	510.929	1.03723
511.894	0.246687	511.894	1.00807
512.858	0.140175	512.858	0.89046
513.822	0.0545443	513.822	0.73302
514.786	0.00856038	514.786	0.66346
515.751	0.0992562	515.751	0.88524
516.715	0.100569	516.715	0.95061
517.679	-0.106038	517.679	0.64586
518.643	-0.327423	518.643	0.25353
519.607	-0.373106	519.607	0.10684
520.572	-0.179233	520.572	0.39295
521.536	0.0518278	521.536	0.76972
522.5	0.122063	522.5	0.84963
523.465	0.0468237	523.465	0.66294
524.429	-0.11228	524.429	0.39933
525.393	-0.383163	525.393	0.08633
526.357	-0.656905	526.357	-0.21725
527.321	-0.744235	527.321	-0.34163
528.286	-0.366256	528.286	-0.05161
529.25	-0.146044	529.25	0.14888
530.214	-0.185385	530.214	0.16769
531.178	-0.336427	531.178	0.08951
532.143	-0.476372	532.143	0.01115
533.107	-0.570922	533.107	-0.03381
534.071	-0.635561	534.071	-0.06417
535.035	-0.660131	535.035	-0.06754
536	-0.660518	536	-0.06177
536.964	-0.732384	536.964	-0.17214
537.928	-0.924846	537.928	-0.48354
538.892	-1.14402	538.892	-0.88677
539.856	-1.21908	539.856	-1.05644
540.821	-1.01954	540.821	-0.76887
541.785	-0.856875	541.785	-0.53604
542.749	-0.740531	542.749	-0.41205
543.713	-0.665605	543.713	-0.37567
544.678	-0.638272	544.678	-0.4191
545.642	-0.669735	545.642	-0.60542
546.606	-0.69825	546.606	-0.75121
547.57	-0.643459	547.57	-0.57874
548.534	-0.534942	548.534	-0.18157
549.499	-0.490466	549.499	0.02361
550.463	-0.554016	550.463	-0.16041
551.427	-0.655279	551.427	-0.57247
552.391	-0.657879	552.391	-0.73531
553.356	-0.436031	553.356	-0.40076
554.32	-0.331501	554.32	-0.20526
555.284	-0.487026	555.284	-0.39067
556.248	-0.683045	556.248	-0.69064
557.213	-0.70152	557.213	-0.7804
558.177	-0.439428	558.177	-0.43616
559.141	-0.20902	559.141	-0.08841
560.105	-0.311904	560.105	-0.12709
561.07	-0.608171	561.07	-0.41485
562.034	-0.756249	562.034	-0.58141
562.998	-0.649157	562.998	-0.46757
563.962	-0.442632	563.962	-0.20767
564.927	-0.425368	564.927	-0.15065
565.891	-0.733143	565.891	-0.43413
566.855	-0.904531	566.855	-0.61334
567.819	-0.770185	567.819	-0.48711
568.783	-0.553223	568.783	-0.25594
569.748	-0.416759	569.748	-0.13397
570.712	-0.387913	570.712	-0.21019
571.676	-0.405688	571.676	-0.30161
572.64	-0.510431	572.64	-0.31341
573.605	-0.6246	573.605	-0.28659
574.569	-0.610932	574.569	-0.29863
575.533	-0.434499	575.533	-0.3828
576.497	-0.208999	576.497	-0.48253
577.462	-0.103127	577.462	-0.47864
578.426	-0.134871	578.426	-0.34465
579.39	-0.159271	579.39	-0.23059
580.354	-0.172622	580.354	-0.17826
581.318	-0.166624	581.318	-0.16908
582.283	-0.124042	582.283	-0.16685
583.247	-0.0222282	583.247	-0.17532
584.211	0.0597982	584.211	-0.17623
585.175	0.0568327	585.175	-0.18912
586.14	0.055328	586.14	-0.17974
587.104	0.162579	587.104	-0.08919
588.068	0.392524	588.068	0.10561
589.032	0.616146	589.032	0.29135
589.997	0.66166	589.997	0.30479
590.961	0.55905	590.961	0.16861
591.925	0.54231	591.925	0.07444
592.889	0.6507	592.889	0.06622
593.854	0.822266	593.854	0.1027
594.818	0.991237	594.818	0.12544
595.782	1.12936	595.782	0.02797
596.746	1.35505	596.746	0.09928
597.71	1.71772	597.71	0.43746
598.675	2.11118	598.675	0.85698
599.639	2.48463	599.639	1.24283
600.603	2.83019	600.603	1.58022
601.567	3.13739	601.567	1.82868
602.532	3.39485	602.532	1.91335
603.496	3.60984	603.496	1.89422
604.46	3.80449	604.46	1.89636
605.424	3.98403	605.424	1.94864
606.389	4.11029	606.389	2.00994
607.353	4.11919	607.353	1.9964
608.317	3.96814	608.317	1.83452
609.281	3.94302	609.281	1.85223
610.245	4.21332	610.245	2.2392
611.21	4.43015	611.21	2.64741
612.174	4.38787	612.174	2.81834
613.138	4.09918	613.138	2.72521
614.102	3.79081	614.102	2.58816
615.067	3.53715	615.067	2.47551
616.031	3.2805	616.031	2.34056
616.995	2.93341	616.995	2.10052
617.959	2.52198	617.959	1.76617
618.924	2.1758	618.924	1.4717
619.888	2.05451	619.888	1.40278
620.852	2.09863	620.852	1.51499
621.816	1.93961	621.816	1.45011
622.78	1.49818	622.78	1.12348
623.745	1.12315	623.745	0.8051
624.709	1.07137	624.709	0.73783
625.673	1.35388	625.673	0.998
626.638	1.46979	626.638	1.1334
627.602	1.32505	627.602	1.07117
628.566	1.1233	628.566	0.95688
629.53	0.88247	629.53	0.83797
630.494	0.641017	630.494	0.72435
631.459	0.46783	631.459	0.62135
632.423	0.426327	632.423	0.48809
633.387	0.4468	633.387	0.38733
634.351	0.459686	634.351	0.42986
635.316	0.46954	635.316	0.60104
636.28	0.490746	636.28	0.77416
637.244	0.530986	637.244	0.85807
638.208	0.582831	638.208	0.86137
639.173	0.6103	639.173	0.88315
640.137	0.569639	640.137	0.96386
641.101	0.612109	641.101	0.9824
642.065	0.9173	642.065	0.82933
643.029	1.31282	643.029	0.55775
643.994	1.44226	643.994	0.39702
644.958	0.998955	644.958	0.42574
645.922	0.613474	645.922	0.49477
646.886	0.527052	646.886	0.59147
647.851	0.604783	647.851	0.68413
648.815	0.662401	648.815	0.71612
649.779	0.627135	649.779	0.63915
650.743	0.549138	650.743	0.51408
651.707	0.477841	651.707	0.4227
652.672	0.417505	652.672	0.36386
653.636	0.391483	653.636	0.31495
654.6	0.411411	654.6	0.262
655.564	0.45687	655.564	0.22434
656.529	0.491891	656.529	0.26846
657.493	0.517156	657.493	0.48494
658.457	0.516632	658.457	0.58816
659.421	0.437563	659.421	0.37824
660.386	0.377855	660.386	0.11581
661.35	0.439998	661.35	0.09464
662.314	0.68415	662.314	0.523
663.278	0.842839	663.278	0.85097
664.243	0.753085	664.243	0.80417
665.207	0.559519	665.207	0.57467
666.171	0.388758	666.171	0.3711
667.135	0.271728	667.135	0.25385
668.1	0.21767	668.1	0.20292
669.064	0.273066	669.064	0.21804
670.028	0.408563	670.028	0.28677
670.992	0.49203	670.992	0.35796
671.956	0.511208	671.956	0.4318
672.921	0.452937	672.921	0.43546
673.885	0.286139	673.885	0.25343
674.849	-0.0219832	674.849	-0.25681
675.813	-0.199115	675.813	-0.48317
676.778	-0.14611	676.778	-0.16815
677.742	-0.0669051	677.742	0.20026
678.706	-0.0426953	678.706	0.32957
679.67	-0.0653442	679.67	0.21353
680.635	-0.0850545	680.635	0.15397
681.599	-0.0795605	681.599	0.35969
682.563	-0.0707113	682.563	0.56753
683.527	-0.072299	683.527	0.53715
684.491	-0.0852694	684.491	0.29629
685.456	-0.106073	685.456	0.04038
686.42	-0.127373	686.42	-0.08177
687.384	-0.156424	687.384	-0.10928
688.348	-0.231535	688.348	-0.14781
689.313	-0.353958	689.313	-0.20018
690.277	-0.422322	690.277	-0.23215
691.241	-0.364824	691.241	-0.20389
692.205	-0.235072	692.205	-0.13023
693.17	-0.254541	693.17	-0.17279
694.134	-0.59158	694.134	-0.46772
695.098	-0.818454	695.098	-0.69547
696.062	-0.752436	696.062	-0.69025
697.027	-0.556092	697.027	-0.54534
697.991	-0.425655	697.991	-0.44292
698.955	-0.407701	698.955	-0.44308
699.919	-0.43366	699.919	-0.4649
700.883	-0.512797	700.883	-0.47817
701.848	-0.610918	701.848	-0.49717
702.812	-0.701894	702.812	-0.56513
703.776	-0.779747	703.776	-0.72283
704.74	-0.804603	704.74	-0.8343
705.705	-0.66586	705.705	-0.65639
706.669	-0.429128	706.669	-0.27698
707.633	-0.349066	707.633	-0.05196
708.597	-0.48221	708.597	-0.08536
709.562	-0.671479	709.562	-0.24765
710.526	-0.722379	710.526	-0.34566
711.49	-0.589849	711.49	-0.36451
712.454	-0.538744	712.454	-0.36923
713.418	-0.632818	713.418	-0.34609
714.383	-0.727402	714.383	-0.32556
715.347	-0.687979	715.347	-0.34141
716.311	-0.503192	716.311	-0.40543
717.275	-0.432692	717.275	-0.46204
718.24	-0.621947	718.24	-0.5586
719.204	-0.813301	719.204	-0.60172
720.168	-0.858886	720.168	-0.51844
721.132	-0.788129	721.132	-0.31621
722.097	-0.72534	722.097	-0.07974
723.061	-0.774246	723.061	0.26453
724.025	-0.8404	724.025	0.5436
724.989	-0.782009	724.989	0.49219
725.953	-0.640939	725.953	0.15241
726.918	-0.582914	726.918	-0.22865
727.882	-0.719657	727.882	-0.52957
728.846	-0.948085	728.846	-0.71504
729.81	-0.98277	729.81	-0.58388
730.775	-0.801688	730.775	-0.07546
731.739	-0.633315	731.739	0.28575
732.703	-0.535173	732.703	0.24678
733.667	-0.501711	733.667	-0.09294
734.632	-0.529632	734.632	-0.36489
735.596	-0.710186	735.596	-0.58146
736.56	-0.817276	736.56	-0.71732
737.524	-0.739163	737.524	-0.66748
738.489	-0.639421	738.489	-0.57796
739.453	-0.695006	739.453	-0.64554
740.417	-1.00739	740.417	-1.06886
741.381	-1.1962	741.381	-1.3523
742.346	-0.982474	742.346	-1.18633
743.31	-0.667679	743.31	-0.8521
744.274	-0.552805	744.274	-0.64839
745.238	-0.674076	745.238	-0.65243
746.202	-0.837881	746.202	-0.75015
747.167	-0.889783	747.167	-0.89253
748.131	-0.870345	748.131	-1.04232
749.095	-0.866471	749.095	-1.12008
750.059	-0.882743	750.059	-1.11548
751.024	-0.887421	751.024	-1.04628
751.988	-0.851172	751.988	-0.89148
752.952	-0.78032	752.952	-0.65237
753.916	-0.729183	753.916	-0.56582
754.88	-0.693697	754.88	-0.66952
755.845	-0.684442	755.845	-0.81966
756.809	-0.716964	756.809	-0.95277
757.773	-0.78327	757.773	-1.06985
758.737	-0.831742	758.737	-1.11539
759.702	-0.83671	759.702	-1.00766
760.666	-0.850023	760.666	-0.90986
761.63	-0.882979	761.63	-0.8386
762.594	-0.929611	762.594	-0.81113
763.559	-0.984952	763.559	-0.85775
764.523	-1.0737	764.523	-1.12604
765.487	-1.12997	765.487	-1.32156
766.451	-1.1015	766.451	-1.23979
767.415	-1.03298	767.415	-1.02307
768.38	-0.971646	768.38	-0.87248
769.344	-0.929268	769.344	-0.86018
770.308	-0.909521	770.308	-0.91615
771.273	-0.919386	771.273	-0.99612
772.237	-0.954818	772.237	-1.08827
773.201	-1.02259	773.201	-1.16823
774.165	-1.11969	774.165	-1.22852
775.129	-1.18561	775.129	-1.24538
776.094	-1.14428	776.094	-1.16544
777.058	-1.00256	777.058	-0.99227
778.022	-0.906426	778.022	-0.889
778.986	-0.857965	778.986	-0.86498
779.951	-0.857383	779.951	-0.92133
780.915	-0.920518	780.915	-1.08816
781.879	-1.03837	781.879	-1.38691
782.843	-1.08238	782.843	-1.51159
783.808	-0.996951	783.808	-1.34509
784.772	-0.919518	784.772	-1.15486
785.736	-0.878525	785.736	-1.02794
786.7	-0.868975	786.7	-0.95352
787.664	-0.885213	787.664	-0.90692
788.629	-0.98911	788.629	-0.91055
789.593	-1.04829	789.593	-0.91769
790.557	-0.977361	790.557	-0.88142
791.521	-0.859954	791.521	-0.84549
792.486	-0.795981	792.486	-0.88537
793.45	-0.820463	793.45	-1.06239
794.414	-0.876437	794.414	-1.25315
795.378	-0.950806	795.378	-1.39588
796.342	-1.01862	796.342	-1.47681
797.307	-1.04165	797.307	-1.44772
798.271	-1.01268	798.271	-1.29433
799.235	-0.944988	799.235	-1.11671
800.199	-0.820225	800.199	-1.03882
801.164	-0.66645	801.164	-1.03925
802.128	-0.598123	802.128	-1.01938
803.092	-0.625194	803.092	-0.96742
804.056	-0.670029	804.056	-0.91791
805.021	-0.679147	805.021	-0.91037
805.985	-0.652664	805.985	-0.94392
806.949	-0.601547	806.949	-0.90938
807.913	-0.50931	807.913	-0.77702
808.878	-0.455221	808.878	-0.66847
809.842	-0.489171	809.842	-0.64195
810.806	-0.576043	810.806	-0.6869
811.77	-0.595411	811.77	-0.75306
812.735	-0.429764	812.735	-0.8882
813.699	-0.363916	813.699	-0.9989
814.663	-0.543248	814.663	-1.07971
815.627	-0.780766	815.627	-1.11113
816.591	-0.862489	816.591	-1.06987
817.556	-0.683263	817.556	-0.88133
818.52	-0.538016	818.52	-0.73061
819.484	-0.488653	819.484	-0.63633
820.448	-0.505763	820.448	-0.60459
821.413	-0.600861	821.413	-0.69314
822.377	-0.771202	822.377	-0.94041
823.341	-0.90092	823.341	-1.1002
824.305	-0.859675	824.305	-0.83858
825.269	-0.770882	825.269	-0.48487
826.234	-0.802191	826.234	-0.52246
827.198	-0.935794	827.198	-0.95387
828.162	-1.03038	828.162	-1.35835
829.126	-0.940834	829.126	-1.29914
830.091	-0.770912	830.091	-0.98809
831.055	-0.755483	831.055	-0.93111
832.019	-0.870168	832.019	-1.10854
832.983	-0.932142	832.983	-1.21149
833.948	-0.850108	833.948	-1.02884
834.912	-0.691105	834.912	-0.67896
835.876	-0.604859	835.876	-0.54769
836.84	-0.592712	836.84	-0.65011
837.805	-0.590124	837.805	-0.75643
838.769	-0.581457	838.769	-0.79901
839.733	-0.593914	839.733	-0.81806
840.697	-0.677126	840.697	-0.89626
841.662	-0.887607	841.662	-1.07952
842.626	-0.986989	842.626	-1.17852
843.59	-0.914861	843.59	-1.15108
844.554	-0.785609	844.554	-1.03933
845.518	-0.664788	845.518	-0.86516
846.483	-0.549692	846.483	-0.57186
847.447	-0.524623	847.447	-0.44141
848.411	-0.701738	848.411	-0.59086
849.375	-0.839564	849.375	-0.77323
850.34	-0.826982	850.34	-0.90086
851.304	-0.70812	851.304	-0.97303
852.268	-0.609355	852.268	-0.98629
853.232	-0.522605	853.232	-0.85021
854.197	-0.492998	854.197	-0.73584
855.161	-0.603394	855.161	-0.73862
856.125	-0.764003	856.125	-0.82616
857.089	-0.83897	857.089	-0.93308
858.053	-0.755732	858.053	-1.06422
859.018	-0.66979	859.018	-1.14578
859.982	-0.711555	859.982	-1.10966
860.946	-0.801576	860.946	-1.00461
861.91	-0.833826	861.91	-0.88303
862.875	-0.790782	862.875	-0.7565
863.839	-0.728189	863.839	-0.66441
864.803	-0.655683	864.803	-0.64619
865.767	-0.606471	865.767	-0.68447
866.732	-0.692044	866.732	-0.78888
867.696	-0.891732	867.696	-0.94896
868.66	-1.02654	868.66	-1.05285
869.624	-0.947485	869.624	-0.97577
870.588	-0.738123	870.588	-0.76968
871.553	-0.617302	871.553	-0.57712
872.517	-0.57707	872.517	-0.39486
873.481	-0.528706	873.481	-0.31773
874.445	-0.431252	874.445	-0.42106
875.41	-0.331359	875.41	-0.6321
876.374	-0.329467	876.374	-0.70383
877.338	-0.434306	877.338	-0.60799
878.302	-0.580842	878.302	-0.62139
879.267	-0.792525	879.267	-0.86332
880.231	-0.96828	880.231	-1.15822
881.195	-0.979569	881.195	-1.22402
882.159	-0.781653	882.159	-0.98809
883.124	-0.597204	883.124	-0.7205
884.088	-0.402528	884.088	-0.36811
885.052	-0.274994	885.052	-0.0933
886.016	-0.281825	886.016	-0.04154
886.981	-0.416497	886.981	-0.24051
887.945	-0.514981	887.945	-0.40246
888.909	-0.592672	888.909	-0.55666
889.873	-0.601255	889.873	-0.62052
890.837	-0.466255	890.837	-0.49066
891.802	-0.273426	891.802	-0.24879
892.766	-0.178073	892.766	-0.14559
893.73	-0.276478	893.73	-0.3382
894.694	-0.364313	894.694	-0.50447
895.659	-0.386691	895.659	-0.56504
896.623	-0.395401	896.623	-0.55725
897.587	-0.452721	897.587	-0.52182
898.551	-0.584229	898.551	-0.44868
899.515	-0.671538	899.515	-0.41017
900.48	-0.657979	900.48	-0.47506
901.444	-0.594515	901.444	-0.54406
902.408	-0.483888	902.408	-0.51254
903.372	-0.347223	903.372	-0.37968
904.337	-0.259794	904.337	-0.27854
905.301	-0.318607	905.301	-0.32469
906.265	-0.391106	906.265	-0.39821
907.229	-0.36484	907.229	-0.41816
908.194	-0.280676	908.194	-0.38201
909.158	-0.222518	909.158	-0.29082
910.122	-0.229951	910.122	-0.07366
911.086	-0.253629	911.086	0.10793
912.051	-0.257026	912.051	0.03122
913.015	-0.245722	913.015	-0.18369
913.979	-0.219091	913.979	-0.29598
914.943	-0.179669	914.943	-0.22737
915.908	-0.162287	915.908	-0.12912
916.872	-0.238747	916.872	-0.1789
917.836	-0.340438	917.836	-0.29863
918.8	-0.314363	918.8	-0.33606
919.764	-0.176653	919.764	-0.28489
920.729	-0.0701156	920.729	-0.21297
921.693	-0.0950855	921.693	-0.14509
922.657	-0.20145	922.657	-0.08885
923.621	-0.311986	923.621	-0.1007
924.586	-0.42475	924.586	-0.17963
925.55	-0.493708	925.55	-0.27129
926.514	-0.494326	926.514	-0.3552
927.478	-0.45759	927.478	-0.39985
928.442	-0.445506	928.442	-0.31102
929.407	-0.453454	929.407	-0.10174
930.371	-0.416854	930.371	0.03444
931.335	-0.323138	931.335	0.04313
932.299	-0.241112	932.299	-0.01762
933.264	-0.241794	933.264	-0.07261
934.228	-0.317775	934.228	-0.11372
935.192	-0.405669	935.192	-0.14644
936.156	-0.517694	936.156	-0.16968
937.121	-0.557884	937.121	-0.19101
938.085	-0.45918	938.085	-0.23052
939.049	-0.265402	939.049	-0.2851
940.013	-0.136124	940.013	-0.26353
940.977	-0.0635702	940.977	-0.1319
941.942	-0.09045	941.942	-0.04312
942.906	-0.265251	942.906	-0.06514
943.87	-0.480203	943.87	-0.14038
944.835	-0.558289	944.835	-0.13612
945.799	-0.459496	945.799	-0.03234
946.763	-0.368352	946.763	0.08205
947.727	-0.293682	947.727	0.20147
948.691	-0.230362	948.691	0.31353
949.656	-0.161991	949.656	0.42046
950.62	-0.0840121	950.62	0.54344
951.584	-0.108676	951.584	0.5417
952.548	-0.332999	952.548	0.33029
953.513	-0.490709	953.513	0.12259
954.477	-0.464272	954.477	0.0087
955.441	-0.30051	955.441	-0.00911
956.405	-0.138005	956.405	0.07064
957.37	0.0547477	957.37	0.35491
958.334	0.18471	958.334	0.55213
959.298	0.231692	959.298	0.57359
960.262	0.223096	960.262	0.50268
961.226	0.169355	961.226	0.44469
962.191	0.0249911	962.191	0.3625
963.155	-0.0406926	963.155	0.34624
964.119	0.0313005	964.119	0.47626
965.083	0.13232	965.083	0.61526
966.048	0.260261	966.048	0.71143
967.012	0.397904	967.012	0.76925
967.976	0.388222	967.976	0.66938
968.94	-0.00410889	968.94	0.07936
969.904	-0.278605	969.904	-0.3233
970.869	-0.273455	970.869	-0.21627
971.833	-0.109103	971.833	0.21005
972.797	0.0486263	972.797	0.53297
973.761	0.26105	973.761	0.77031
974.726	0.356701	974.726	0.85922
975.69	0.192682	975.69	0.62542
976.654	0.00349772	976.654	0.33965
977.618	-0.0338566	977.618	0.26661
978.583	0.0983789	978.583	0.49054
979.547	0.195326	979.547	0.61902
980.511	0.183905	980.511	0.44338
981.475	0.179896	981.475	0.31088
982.44	0.223612	982.44	0.44271
983.404	0.309367	983.404	0.77765
984.368	0.418165	984.368	1.03167
985.332	0.623119	985.332	1.1574
986.297	0.752607	986.297	1.20196
987.261	0.718674	987.261	1.14197
988.225	0.631809	988.225	1.02655
989.189	0.604949	989.189	0.90947
990.153	0.673008	990.153	0.79681
991.118	0.670761	991.118	0.6791
992.082	0.443953	992.082	0.47277
993.046	0.260304	993.046	0.338
994.01	0.335861	994.01	0.45186
994.975	0.594312	994.975	0.78625
995.939	0.704018	995.939	0.96006
996.903	0.39595	996.903	0.71882
997.867	0.167315	997.867	0.49373
998.832	0.249753	998.832	0.47843
999.796	0.466078	999.796	0.59375
1000.76	0.583182	1000.76	0.68673
1001.72	0.497413	1001.72	0.65437
1002.69	0.474963	1002.69	0.69588
1003.65	0.686274	1003.65	0.99067
1004.62	0.886631	1004.62	1.28041
1005.58	0.881748	1005.58	1.33223
1006.54	0.685234	1006.54	1.11325
1007.51	0.557082	1007.51	0.93316
1008.47	0.632321	1008.47	0.89192
1009.44	0.693782	1009.44	0.86492
1010.4	0.6085	1010.4	0.75484
1011.37	0.472795	1011.37	0.61847
1012.33	0.450534	1012.33	0.59562
1013.29	0.672231	1013.29	0.85239
1014.26	0.832886	1014.26	1.043
1015.22	0.858826	1015.22	1.04985
1016.19	0.812567	1016.19	0.98129
1017.15	0.702974	1017.15	0.93583
1018.12	0.529099	1018.12	0.92671
1019.08	0.477495	1019.08	0.95074
1020.04	0.715723	1020.04	1.01877
1021.01	0.929311	1021.01	1.09254
1021.97	0.938882	1021.97	1.15544
1022.94	0.841816	1022.94	1.21993
1023.9	0.861163	1023.9	1.31288
1024.87	1.16185	1024.87	1.4722
1025.83	1.39529	1025.83	1.60298
1026.79	1.51074	1026.79	1.69659
1027.76	1.53933	1027.76	1.75004
1028.72	1.47555	1028.72	1.74186
1029.69	1.28342	1029.69	1.62133
1030.65	1.17126	1030.65	1.54575
1031.62	1.25461	1031.62	1.61142
1032.58	1.33965	1032.58	1.67469
1033.54	1.31499	1033.54	1.61863
1034.51	1.21275	1034.51	1.45313
1035.47	1.17088	1035.47	1.37287
1036.44	1.27374	1036.44	1.49523
1037.4	1.34158	1037.4	1.5807
1038.37	1.35535	1038.37	1.55247
1039.33	1.32898	1039.33	1.47955
1040.29	1.26218	1040.29	1.4527
1041.26	1.11845	1041.26	1.4932
1042.22	1.02587	1042.22	1.51591
1043.19	0.954613	1043.19	1.46095
1044.15	0.978573	1044.15	1.46071
1045.12	1.20305	1045.12	1.64698
1046.08	1.57259	1046.08	2.01156
1047.04	1.76335	1047.04	2.19218
1048.01	1.6301	1048.01	2.01445
1048.97	1.55819	1048.97	1.92525
1049.94	1.6143	1049.94	2.09146
1050.9	1.76824	1050.9	2.38925
1051.86	2.0153	1051.86	2.61277
1052.83	2.48226	1052.83	2.81655
1053.79	2.60392	1053.79	2.77217
1054.76	2.18781	1054.76	2.298
1055.72	1.75802	1055.72	1.84246
1056.69	1.61345	1056.69	1.75272
1057.65	1.71561	1057.65	2.02339
1058.61	1.80235	1058.61	2.22933
1059.58	1.88051	1059.58	2.37997
1060.54	1.9238	1060.54	2.43544
1061.51	1.9041	1061.51	2.32906
1062.47	1.8714	1062.47	2.17189
1063.43	1.91906	1063.43	2.22954
1064.4	2.07529	1064.4	2.56607
1065.36	2.15151	1065.36	2.77096
1066.33	2.11842	1066.33	2.77215
1067.29	2.05505	1067.29	2.69788
1068.26	2.00842	1068.26	2.65369
1069.22	1.98599	1069.22	2.64485
1070.18	2.01111	1070.18	2.65824
1071.15	2.08445	1071.15	2.69355
1072.11	2.16797	1072.11	2.72261
1073.08	2.26377	1073.08	2.74778
1074.04	2.33507	1074.04	2.75332
1075.01	2.27382	1075.01	2.65638
1075.97	2.10625	1075.97	2.47272
1076.93	2.11895	1076.93	2.44766
1077.9	2.33194	1077.9	2.61874
1078.86	2.53353	1078.86	2.78026
1079.83	2.56923	1079.83	2.69797
1080.79	2.48831	1080.79	2.47135
1081.76	2.39412	1081.76	2.43568
1082.72	2.29419	1082.72	2.56428
1083.68	2.19861	1083.68	2.67397
1084.65	2.10299	1084.65	2.67829
1085.61	2.0588	1085.61	2.64815
1086.58	2.16247	1086.58	2.66737
1087.54	2.35292	1087.54	2.7312
1088.51	2.52964	1088.51	2.86193
1089.47	2.67601	1089.47	3.05354
1090.43	2.75886	1090.43	3.19982
1091.4	2.70095	1091.4	3.20797
1092.36	2.60483	1092.36	3.11739
1093.33	2.60332	1093.33	2.92299
1094.29	2.66066	1094.29	2.68771
1095.26	2.70042	1095.26	2.55208
1096.22	2.69389	1096.22	2.59118
1097.18	2.69096	1097.18	2.67729
1098.15	2.779	1098.15	2.74462
1099.11	2.85161	1099.11	2.78662
1100.08	2.74363	1100.08	2.76746
1101.04	2.49509	1101.04	2.69325
1102.01	2.34907	1102.01	2.67312
1102.97	2.48245	1102.97	2.81845
1103.93	2.68027	1103.93	2.98349
1104.9	2.90376	1104.9	3.07788
1105.86	3.08533	1105.86	3.11927
1106.83	3.11687	1106.83	3.15452
1107.79	2.9064	1107.79	3.20262
1108.75	2.81067	1108.75	3.25421
1109.72	3.04584	1109.72	3.29856
1110.68	3.30309	1110.68	3.35247
1111.65	3.39938	1111.65	3.45837
1112.61	3.34644	1112.61	3.61503
1113.58	3.28072	1113.58	3.6515
1114.54	3.19665	1114.54	3.39547
1115.5	3.1057	1115.5	3.19675
1116.47	3.01183	1116.47	3.20041
1117.43	2.9356	1117.43	3.30738
1118.4	2.87979	1118.4	3.33159
1119.36	2.8075	1119.36	3.15122
1120.33	2.86611	1120.33	3.14923
1121.29	3.14259	1121.29	3.44582
1122.25	3.38521	1122.25	3.7282
1123.22	3.44946	1123.22	3.76746
1124.18	3.3842	1124.18	3.60001
1125.15	3.4059	1125.15	3.56452
1126.11	3.5375	1126.11	3.68809
1127.08	3.55672	1127.08	3.75092
1128.04	3.39196	1128.04	3.67645
1129	3.20764	1129	3.55533
1129.97	3.21554	1129.97	3.52555
1130.93	3.39566	1130.93	3.58857
1131.9	3.52494	1131.9	3.65393
1132.86	3.59752	1132.86	3.70833
1133.82	3.68554	1133.82	3.82901
1134.79	3.85034	1134.79	4.14974
1135.75	4.02137	1135.75	4.4955
1136.72	4.02136	1136.72	4.37774
1137.68	3.9143	1137.68	3.95825
1138.64	3.90169	1138.64	3.78203
1139.61	4.0234	1139.61	4.00824
1140.57	4.1785	1140.57	4.3502
1141.54	4.34305	1141.54	4.68665
1142.5	4.45444	1142.5	4.90005
1143.47	4.38613	1143.47	4.61773
1144.43	4.19936	1144.43	4.03903
1145.39	4.04868	1145.39	3.868
1146.36	3.9816	1146.36	4.86766
1147.32	4.00132	1147.32	5.81086
1148.29	4.19302	1148.29	5.99433
1149.25	4.42235	1149.25	5.75898
1150.22	4.57086	1150.22	5.39933
1151.18	4.62166	1151.18	4.93833
1152.14	4.60992	1152.14	4.61775
1153.11	4.47917	1153.11	4.61231
1154.07	4.35437	1154.07	4.63287
1155.04	4.26785	1155.04	4.5566
1156	4.23087	1156	4.41985
1156.97	4.25519	1156.97	4.3096
1157.93	4.37355	1157.93	4.15348
1158.89	4.47764	1158.89	4.15008
1159.86	4.56986	1159.86	4.41338
1160.82	4.66448	1160.82	4.71497
1161.79	4.79046	1161.79	4.88788
1162.75	4.91916	1162.75	4.92446
1163.71	4.84905	1163.71	4.82162
1164.68	4.53016	1164.68	4.54581
1165.64	4.33071	1165.64	4.32465
1166.61	4.34188	1166.61	4.2166
1167.57	4.47481	1167.57	4.21744
1168.54	4.66123	1168.54	4.39976
1169.5	4.88398	1169.5	4.72328
1170.46	4.99362	1170.46	4.8223
1171.43	4.99572	1171.43	4.68049
1172.39	5.03213	1172.39	4.6039
1173.36	5.22861	1173.36	4.91243
1174.32	5.42405	1174.32	5.32252
1175.29	5.30136	1175.29	5.29757
1176.25	5.01327	1176.25	5.00252
1177.21	4.87176	1177.21	4.8117
1178.18	4.94095	1178.18	4.83507
1179.14	5.07897	1179.14	4.96118
1180.11	5.23118	1180.11	5.22059
1181.07	5.36435	1181.07	5.44043
1182.04	5.45692	1182.04	5.41859
1183	5.52141	1183	5.23278
1183.96	5.57851	1183.96	5.13814
1184.93	5.65428	1184.93	5.30899
1185.89	5.67758	1185.89	5.45203
1186.86	5.52342	1186.86	5.4349
1187.82	5.38318	1187.82	5.37383
1188.79	5.45196	1188.79	5.41755
1189.75	5.73375	1189.75	5.61348
1190.71	5.89399	1190.71	5.64479
1191.68	5.86089	1191.68	5.33655
1192.64	5.83752	1192.64	5.18345
1193.61	5.89732	1193.61	5.44281
1194.57	5.94648	1194.57	5.85044
1195.54	5.80437	1195.54	5.80345
1196.5	5.44767	1196.5	5.24545
1197.46	5.30992	1197.46	4.97454
1198.43	5.41601	1198.43	5.06731
1199.39	5.61538	1199.39	5.36887
1200.36	5.84059	1200.36	5.8048
1201.32	6.06524	1201.32	6.33019
1202.29	6.22476	1202.29	6.95002
1203.25	6.34057	1203.25	7.575
1204.21	6.50776	1204.21	7.85478
1205.18	6.74154	1205.18	7.67105
1206.14	6.88123	1206.14	7.29804
1207.11	6.70252	1207.11	6.87683
1208.07	6.44717	1208.07	6.48245
1209.03	6.35464	1209.03	6.15964
1210	6.37678	1210	5.9222
1210.96	6.38024	1210.96	5.81727
1211.93	6.24546	1211.93	5.87363
1212.89	6.25262	1212.89	6.08211
1213.86	6.64034	1213.86	6.55725
1214.82	7.0631	1214.82	7.06851
1215.78	7.28573	1215.78	7.46283
1216.75	7.30346	1216.75	7.75999
1217.71	7.2007	1217.71	7.72079
1218.68	6.80106	1218.68	7.01961
1219.64	6.64318	1219.64	6.59343
1220.61	6.9312	1220.61	6.82527
1221.57	7.36883	1221.57	7.35403
1222.53	7.5618	1222.53	7.52042
1223.5	7.50518	1223.5	7.30822
1224.46	7.46629	1224.46	7.20006
1225.43	7.44893	1225.43	7.22809
1226.39	7.45518	1226.39	7.32883
1227.36	7.43319	1227.36	7.48582
1228.32	7.54329	1228.32	7.65198
1229.28	8.37568	1229.28	7.76467
1230.25	9.49089	1230.25	7.81826
1231.21	9.76058	1231.21	7.74227
1232.18	9.03722	1232.18	7.50894
1233.14	8.26121	1233.14	7.33276
1234.1	8.04402	1234.1	7.46342
1235.07	8.04566	1235.07	7.65996
1236.03	8.00016	1236.03	7.62727
1237	7.9769	1237	7.48177
1237.96	8.162	1237.96	7.56089
1238.93	8.8466	1238.93	8.33516
1239.89	9.20559	1239.89	8.8086
1240.85	8.74994	1240.85	8.59031
1241.82	8.33512	1241.82	8.26496
1242.78	8.43554	1242.78	8.18792
1243.75	8.9103	1243.75	8.32966
1244.71	9.08878	1244.71	8.37572
1245.67	8.89912	1245.67	8.29242
1246.64	8.80055	1246.64	8.30394
1247.6	8.888	1247.6	8.48891
1248.57	9.03929	1248.57	8.73499
1249.53	9.13974	1249.53	8.95735
1250.5	9.19199	1250.5	9.10907
1251.46	9.18208	1251.46	8.88828
1252.42	9.12858	1252.42	8.37375
1253.39	9.12334	1253.39	8.09426
1254.35	9.20485	1254.35	8.41923
1255.32	9.35235	1255.32	8.8807
1256.28	9.62665	1256.28	9.05643
1257.25	9.9071	1257.25	9.10765
1258.21	10.0691	1258.21	9.22756
1259.17	10.1016	1259.17	9.43267
1260.14	10.0532	1260.14	9.57612
1261.1	9.81769	1261.1	9.59061
1262.07	9.67383	1262.07	9.58614
1263.03	9.68876	1263.03	9.52099
1264	9.82896	1264	9.49775
1264.96	10.0921	1264.96	9.66906
1265.92	10.4994	1265.92	10.1095
1266.89	10.7782	1266.89	10.4083
1267.85	10.9305	1267.85	10.5782
1268.82	11.0076	1268.82	10.6109
1269.78	11.0175	1269.78	10.4473
1270.74	10.9795	1270.74	10.2232
1271.71	10.9048	1271.71	10.2181
1272.67	10.8246	1272.67	10.4231
1273.64	10.8059	1273.64	10.8827
1274.6	10.8484	1274.6	11.5565
1275.57	10.9615	1275.57	12.0295
1276.53	11.2551	1276.53	11.9015
1277.49	11.5435	1277.49	11.5793
1278.46	11.6594	1278.46	11.2847
1279.42	11.6805	1279.42	11.0462
1280.39	11.7078	1280.39	10.9245
1281.35	11.7633	1281.35	10.981
1282.32	11.8802	1282.32	11.0723
1283.28	12.1829	1283.28	11.1699
1284.24	12.3633	1284.24	11.2825
1285.21	12.2108	1285.21	11.384
1286.17	11.9498	1286.17	11.5074
1287.14	12.1034	1287.14	11.8104
1288.1	12.7274	1288.1	12.3379
1289.07	13.0243	1289.07	12.599
1290.03	12.9215	1290.03	12.515
1290.99	12.8438	1290.99	12.3527
1291.96	13.1324	1291.96	12.3059
1292.92	13.5511	1292.92	12.3518
1293.89	13.7385	1293.89	12.5376
1294.85	13.7468	1294.85	12.7741
1295.82	13.6256	1295.82	12.8056
1296.78	13.3845	1296.78	12.5123
1297.74	13.2462	1297.74	12.3393
1298.71	13.4045	1298.71	12.6884
1299.67	13.6019	1299.67	13.0641
1300.64	13.7158	1300.64	13.1309
1301.6	13.7586	1301.6	12.9539
1302.57	13.7739	1302.57	12.8026
1303.53	13.7729	1303.53	12.6752
1304.49	13.7187	1304.49	12.6088
1305.46	13.5677	1305.46	12.6012
1306.42	13.5419	1306.42	12.7188
1307.39	13.8144	1307.39	13.0732
1308.35	14.2208	1308.35	13.5297
1309.32	14.3505	1309.32	13.6
1310.28	14.2523	1310.28	13.3647
1311.24	14.075	1311.24	13.158
1312.21	13.8502	1312.21	13.0614
1313.17	13.6757	1313.17	13.0382
1314.14	13.6486	1314.14	13.0767
1315.1	13.7007	1315.1	13.1874
1316.06	13.8299	1316.06	13.4355
1317.03	13.959	1317.03	13.7263
1317.99	13.9544	1317.99	13.87
1318.96	13.6445	1318.96	13.6157
1319.92	13.6339	1319.92	13.62
1320.88	14.1679	1320.88	14.1076
1321.85	14.5855	1321.85	14.5001
1322.81	14.5687	1322.81	14.4405
1323.78	14.2725	1323.78	14.0614
1324.74	14.0726	1324.74	13.8309
1325.71	13.9587	1325.71	13.7402
1326.67	13.8172	1326.67	13.6927
1327.63	13.6339	1327.63	13.6708
1328.6	13.4367	1328.6	13.5992
1329.56	13.1976	1329.56	13.3117
1330.53	12.9943	1330.53	13.01
1331.49	12.9384	1331.49	12.9146
1332.46	12.9742	1332.46	12.9963
1333.42	13.0097	1333.42	13.2017
1334.38	13.0186	1334.38	13.628
1335.35	13.0355	1335.35	13.8481
1336.31	13.126	1336.31	13.6036
1337.28	13.1446	1337.28	13.3308
1338.24	12.998	1338.24	13.1773
1339.21	12.7995	1339.21	13.1562
1340.17	12.8025	1340.17	13.3687
1341.13	12.9963	1341.13	13.8076
1342.1	13.0345	1342.1	13.9553
1343.06	12.9	1343.06	13.7532
1344.03	12.731	1344.03	13.4766
1344.99	12.5874	1344.99	13.3056
1345.96	12.4964	1345.96	13.2142
1346.92	12.5835	1346.92	13.2244
1347.88	12.6916	1347.88	13.264
1348.85	12.5394	1348.85	13.1898
1349.81	12.0677	1349.81	12.936
1350.78	11.7678	1350.78	12.7767
1351.74	11.9432	1351.74	12.9511
1352.7	12.0657	1352.7	13.0052
1353.67	11.9815	1353.67	12.6842
1354.63	11.8225	1354.63	12.264
1355.6	11.7797	1355.6	12.3335
1356.56	11.8394	1356.56	12.8859
1357.53	11.6713	1357.53	12.9269
1358.49	11.3099	1358.49	12.4423
1359.45	11.1895	1359.45	12.1617
1360.42	11.6204	1360.42	12.684
1361.38	12.0527	1361.38	13.3103
1362.35	11.7571	1362.35	13.167
1363.31	11.2364	1363.31	12.6859
1364.28	11.1236	1364.28	12.4258
1365.24	11.4172	1365.24	12.4622
1366.2	11.5386	1366.2	12.4599
1367.17	11.1995	1367.17	12.3386
1368.13	10.9238	1368.13	12.1898
1369.1	10.7644	1369.1	11.9527
1370.06	10.7089	1370.06	11.7923
1371.03	10.7711	1371.03	11.9799
1371.99	10.9251	1371.99	12.4758
1372.95	11.0549	1372.95	12.8081
1373.92	11.1437	1373.92	12.9665
1374.88	11.0309	1374.88	12.8255
1375.85	10.6333	1375.85	12.2467
1376.81	10.2437	1376.81	11.6528
1377.78	10.085	1377.78	11.4277
1378.74	10.0414	1378.74	11.3427
1379.7	10.0745	1379.7	11.209
1380.67	10.1563	1380.67	11.0317
1381.63	10.1939	1381.63	10.9017
1382.6	10.1687	1382.6	10.8182
1383.56	10.0968	1383.56	10.7618
1384.53	9.95435	1384.53	10.7193
1385.49	9.78774	1385.49	10.6748
1386.45	9.62398	1386.45	10.6176
1387.42	9.49467	1387.42	10.5824
1388.38	9.49934	1388.38	10.6886
1389.35	9.58006	1389.35	10.8769
1390.31	9.54781	1390.31	10.9384
1391.28	9.36274	1391.28	10.7997
1392.24	9.21345	1392.24	10.6367
1393.2	9.27669	1393.2	10.56
1394.17	9.33908	1394.17	10.5055
1395.13	9.29825	1395.13	10.4741
1396.1	9.19171	1396.1	10.4284
1397.06	9.04133	1397.06	10.2577
1398.02	8.79679	1398.02	9.86285
1398.99	8.84122	1398.99	9.81044
1399.95	9.22037	1399.95	10.1779
1400.92	9.39965	1400.92	10.4226
1401.88	9.08616	1401.88	10.1674
1402.85	8.64456	1402.85	9.75152
1403.81	8.52304	1403.81	9.64219
1404.77	8.58396	1404.77	9.72168
1405.74	8.67415	1405.74	9.83928
1406.7	8.76559	1406.7	9.9632
1407.67	8.83864	1407.67	10.0641
1408.63	9.03591	1408.63	10.2829
1409.6	8.9992	1409.6	10.2921
1410.56	8.53107	1410.56	9.91394
1411.52	8.06849	1411.52	9.45397
1412.49	8.01673	1412.49	9.26056
1413.45	8.25672	1413.45	9.29695
1414.42	8.18873	1414.42	9.19164
1415.38	7.87738	1415.38	8.95849
1416.35	7.61733	1416.35	8.71439
1417.31	7.48604	1417.31	8.49071
1418.27	7.50367	1418.27	8.38186
1419.24	7.82509	1419.24	8.50745
1420.2	8.15832	1420.2	8.72967
1421.17	8.38294	1421.17	9.09476
1422.13	8.44956	1422.13	9.44396
1423.09	8.26533	1423.09	9.30443
1424.06	7.69142	1424.06	8.40205
1425.02	7.47074	1425.02	8.15136
1425.99	7.64992	1425.99	8.72158
1426.95	7.86625	1426.95	9.27275
1427.91	7.94096	1427.91	9.21588
1428.88	7.94282	1428.88	8.9199
1429.84	7.98884	1429.84	8.99387
1430.81	8.00584	1430.81	9.19271
1431.77	7.87624	1431.77	9.1084
1432.74	7.61081	1432.74	8.69522
1433.7	7.36241	1433.7	8.38712
1434.66	7.05534	1434.66	8.34941
1435.63	6.97929	1435.63	8.37543
1436.59	7.24614	1436.59	8.4317
1437.56	7.55238	1437.56	8.49072
1438.52	7.66171	1438.52	8.56814
1439.49	7.61388	1439.49	8.65333
1440.45	7.45597	1440.45	8.5498
1441.41	7.234	1441.41	8.32897
1442.38	7.10218	1442.38	8.30907
1443.34	7.10639	1443.34	8.66057
1444.31	7.16819	1444.31	8.9521
1445.27	7.26311	1445.27	8.87734
1446.24	7.37588	1446.24	8.72465
1447.2	7.53609	1447.2	8.65393
1448.16	7.7021	1448.16	8.65726
1449.13	7.81775	1449.13	8.70425
1450.09	7.88442	1450.09	8.79583
1451.06	7.80824	1451.06	8.91449
1452.02	7.59331	1452.02	9.04977
1452.98	7.40332	1452.98	9.08111
1453.95	7.333	1453.95	8.88869
1454.91	7.2749	1454.91	8.63911
1455.88	7.07656	1455.88	8.44993
1456.84	6.90532	1456.84	8.3334
1457.81	6.93223	1457.81	8.28707
1458.77	7.13238	1458.77	8.30142
1459.73	7.28529	1459.73	8.38049
1460.7	7.39467	1460.7	8.57291
1461.66	7.51603	1461.66	8.74242
1462.63	7.66779	1462.63	8.87469
1463.59	7.75264	1463.59	8.93052
1464.56	7.62796	1464.56	8.7672
1465.52	7.41195	1465.52	8.53216
1466.48	7.2919	1466.48	8.53938
1467.45	7.23915	1467.45	8.69059
1468.41	7.18331	1468.41	8.7521
1469.38	7.09632	1469.38	8.60985
1470.34	7.14213	1470.34	8.59939
1471.31	7.47575	1471.31	8.83644
1472.27	7.5278	1472.27	8.93931
1473.23	7.05657	1473.23	8.73085
1474.2	6.50924	1474.2	8.41063
1475.16	6.52716	1475.16	8.33763
1476.13	6.88918	1476.13	8.42041
1477.09	7.14467	1477.09	8.38188
1478.06	7.26444	1478.06	8.21978
1479.02	7.24253	1479.02	8.05825
1479.98	7.00943	1479.98	7.92542
1480.95	6.82225	1480.95	7.8659
1481.91	6.7572	1481.91	7.94848
1482.88	6.72505	1482.88	8.04485
1483.84	6.66457	1483.84	8.0594
1484.81	6.63371	1484.81	8.04666
1485.77	6.8482	1485.77	8.25524
1486.73	7.20209	1486.73	8.59655
1487.7	7.28851	1487.7	8.65714
1488.66	7.1172	1488.66	8.41751
1489.63	6.98535	1489.63	8.3125
1490.59	7.15334	1490.59	8.85975
1491.56	7.23618	1491.56	9.23833
1492.52	6.96311	1492.52	8.88648
1493.48	6.68849	1493.48	8.39725
1494.45	6.67865	1494.45	8.30989
1495.41	6.86565	1495.41	8.56564
1496.38	6.90348	1496.38	8.52049
1497.34	6.81898	1497.34	8.23114
1498.3	6.72033	1498.3	8.00566
1499.27	6.63049	1499.27	7.92366
1500.23	6.60078	1500.23	7.97676
1501.2	6.75096	1501.2	8.42033
1502.16	6.86684	1502.16	8.71573
1503.13	6.78108	1503.13	8.29961
1504.09	6.644	1504.09	7.67187
1505.05	6.62376	1505.05	7.56918
1506.02	6.71942	1506.02	8.01486
1506.98	6.79888	1506.98	8.41538
1507.95	6.85597	1507.95	8.74416
1508.91	6.80304	1508.91	8.7736
1509.88	6.57576	1509.88	8.28537
1510.84	6.41074	1510.84	7.8269
1511.8	6.60748	1511.8	7.90945
1512.77	6.78465	1512.77	8.0769
1513.73	6.57658	1513.73	7.90076
1514.7	6.24842	1514.7	7.56908
1515.66	6.32251	1515.66	7.58792
1516.62	6.79798	1516.62	7.95611
1517.59	7.00934	1517.59	8.45379
1518.55	6.96099	1518.55	9.04575
1519.52	6.9856	1519.52	9.38528
1520.48	7.33571	1520.48	8.98916
1521.45	7.60952	1521.45	8.6101
1522.41	7.43198	1522.41	8.97296
1523.38	7.16734	1523.38	9.44323
1524.34	7.12567	1524.34	9.39584
1525.3	7.22279	1525.3	8.89801
1526.27	7.11688	1526.27	8.3572
1527.23	6.83246	1527.23	7.79668
1528.2	6.78246	1528.2	7.61352
1529.16	6.98719	1529.16	7.85182
1530.12	7.19084	1530.12	8.14889
1531.09	7.25211	1531.09	8.28205
1532.05	7.24327	1532.05	8.35642
1533.02	7.15354	1533.02	8.44765
1533.98	7.08825	1533.98	8.55162
1534.94	7.1557	1534.94	8.66757
1535.91	7.32983	1535.91	8.7861
1536.87	7.41471	1536.87	8.76729
1537.84	7.3988	1537.84	8.59765
1538.8	7.34375	1538.8	8.49154
1539.77	7.28023	1539.77	8.54936
1540.73	7.26204	1540.73	8.59777
1541.69	7.3872	1541.69	8.4016
1542.66	7.45692	1542.66	8.1967
1543.62	7.25904	1543.62	8.11428
1544.59	7.03634	1544.59	8.16038
1545.55	7.07702	1545.55	8.38202
1546.52	7.37069	1546.52	8.78785
1547.48	7.59317	1547.48	8.9933
1548.44	7.73605	1548.44	9.00124
1549.41	7.85173	1549.41	9.0753
1550.37	7.98047	1550.37	9.42267
1551.34	8.00845	1551.34	9.60921
1552.3	7.7222	1552.3	9.09621
1553.27	7.48503	1553.27	8.62531
1554.23	7.45507	1554.23	8.56354
1555.19	7.56877	1555.19	8.86396
1556.16	7.77602	1556.16	9.64713
1557.12	8.05014	1557.12	10.7689
1558.09	8.23367	1558.09	11.1778
1559.05	8.32436	1559.05	10.8836
1560.02	8.31784	1560.02	10.424
1560.98	8.15756	1560.98	9.93287
1561.94	8.00701	1561.94	9.52246
1562.91	7.85121	1562.91	9.18573
1563.87	7.8358	1563.87	9.03309
1564.84	8.05782	1564.84	9.168
1565.8	8.40703	1565.8	9.48476
1566.77	8.69875	1566.77	9.75509
1567.73	8.92046	1567.73	9.95683
1568.69	9.03805	1568.69	9.99977
1569.66	9.05136	1569.66	9.88658
1570.62	8.9697	1570.62	9.73924
1571.59	8.57724	1571.59	9.39122
1572.55	8.44127	1572.55	9.35375
1573.52	8.71457	1573.52	9.84351
1574.48	9.02857	1574.48	10.3822
1575.44	9.14991	1575.44	10.6211
1576.41	9.16005	1576.41	10.6011
1577.37	9.20989	1577.37	10.2375
1578.34	9.28079	1578.34	9.77591
1579.3	9.335	1579.3	9.7303
1580.26	9.36359	1580.26	10.2056
1581.23	9.37987	1581.23	10.5148
1582.19	9.38454	1582.19	10.5198
1583.16	9.39164	1583.16	10.5146
1584.12	9.40395	1584.12	10.5541
1585.09	9.44141	1585.09	10.6229
1586.05	9.51839	1586.05	10.7107
1587.01	9.62133	1587.01	10.7996
1587.98	9.76753	1587.98	10.8849
1588.94	9.90514	1588.94	10.9408
1589.91	9.99488	1589.91	10.9457
1590.87	10.0419	1590.87	10.9152
1591.84	9.87753	1591.84	10.7564
1592.8	9.45196	1592.8	10.4061
1593.76	9.29428	1593.76	10.3933
1594.73	9.54291	1594.73	10.9465
1595.69	9.78624	1595.69	11.413
1596.66	9.54316	1596.66	10.924
1597.62	9.30191	1597.62	10.3375
1598.59	9.48618	1598.59	10.34
1599.55	9.78315	1599.55	10.6618
1600.51	9.81751	1600.51	10.8581
1601.48	9.6093	1601.48	10.9337
1602.44	9.36299	1602.44	10.9754
1603.41	9.09603	1603.41	10.9719
1604.37	8.90671	1604.37	10.8608
1605.33	8.82409	1605.33	10.5936
1606.3	8.85817	1606.3	10.3642
1607.26	9.18035	1607.26	10.2027
1608.23	9.37211	1608.23	10.1876
1609.19	9.28884	1609.19	10.4514
1610.16	9.08839	1610.16	10.782
1611.12	8.95988	1611.12	10.7686
1612.08	8.85091	1612.08	10.4985
1613.05	8.59488	1613.05	10.2017
1614.01	8.25638	1614.01	9.90645
1614.98	8.03824	1614.98	9.68599
1615.94	8.05805	1615.94	9.66154
1616.9	8.0653	1616.9	9.56402
1617.87	8.02607	1617.87	9.31045
1618.83	7.96404	1618.83	9.08361
1619.8	7.90554	1619.8	8.98403
1620.76	7.78713	1620.76	8.94728
1621.73	7.35834	1621.73	8.87584
1622.69	6.97677	1622.69	8.81811
1623.65	7.18592	1623.65	8.89035
1624.62	7.7029	1624.62	9.01454
1625.58	7.74725	1625.58	8.87777
1626.55	7.21783	1626.55	8.41376
1627.51	6.89296	1627.51	8.13174
1628.48	6.77065	1628.48	8.05011
1629.44	6.6493	1629.44	7.902
1630.4	6.44291	1630.4	7.41389
1631.37	6.24671	1631.37	7.1207
1632.33	6.12332	1632.33	7.69853
1633.3	5.97088	1633.3	8.16107
1634.26	5.72713	1634.26	7.80659
1635.23	5.46788	1635.23	7.00957
1636.19	5.36719	1636.19	6.72306
1637.15	5.35383	1637.15	6.7952
1638.12	5.17051	1638.12	6.69685
1639.08	4.84244	1639.08	6.39692
1640.05	4.53929	1640.05	6.08797
1641.01	4.23347	1641.01	5.66314
1641.97	4.16258	1641.97	5.57031
1642.94	4.40729	1642.94	5.89886
1643.9	4.62504	1643.9	6.40208
1644.87	4.66163	1644.87	7.10619
1645.83	4.57821	1645.83	7.58942
1646.8	4.37061	1646.8	6.87724
1647.76	4.14207	1647.76	5.7888
1648.72	3.99376	1648.72	5.34708
1649.69	3.94567	1649.69	5.57029
1650.65	4.01979	1650.65	5.79564
1651.62	4.22017	1651.62	6.01875
1652.58	4.25467	1652.58	6.08968
1653.55	4.12783	1653.55	6.0112
1654.51	3.97857	1654.51	5.85178
1655.47	3.86019	1655.47	5.50771
1656.44	3.74439	1656.44	5.24654
1657.4	3.61951	1657.4	5.30834
1658.37	3.5023	1658.37	5.37781
1659.33	3.40518	1659.33	5.26373
1660.3	3.31047	1660.3	5.0215
1661.26	3.16935	1661.26	4.74245
1662.22	3.00753	1662.22	4.47476
1663.19	2.89947	1663.19	4.38313
1664.15	2.83181	1664.15	4.46098
1665.12	2.67944	1665.12	4.36174
1666.08	2.34885	1666.08	3.92131
1667.05	2.18403	1667.05	3.6471
1668.01	2.20587	1668.01	3.58739
1668.97	2.2944	1668.97	3.64215
1669.94	2.41658	1669.94	3.79612
1670.9	2.52305	1670.9	3.98033
1671.87	2.54779	1671.87	4.18661
1672.83	2.53571	1672.83	4.30044
1673.8	2.52073	1673.8	4.1886
1674.76	2.52283	1674.76	3.94916
1675.72	2.62509	1675.72	3.95413
1676.69	2.76686	1676.69	4.13941
1677.65	2.70081	1677.65	4.29376
1678.62	2.43618	1678.62	4.37786
1679.58	2.16357	1679.58	4.30434
1680.55	1.84624	1680.55	3.77765
1681.51	1.73588	1681.51	3.52444
1682.47	1.89208	1682.47	3.69201
1683.44	2.08525	1683.44	3.91651
1684.4	2.22692	1684.4	3.96206
1685.37	2.26139	1685.37	3.89342
1686.33	1.95336	1686.33	3.71056
1687.29	1.61257	1687.29	3.48904
1688.26	1.65627	1688.26	3.34837
1689.22	1.94883	1689.22	3.29008
1690.19	2.045	1690.19	3.2331
1691.15	1.95477	1691.15	3.16653
1692.12	1.81088	1692.12	3.10469
1693.08	1.649	1693.08	3.06276
1694.04	1.56761	1694.04	3.07125
1695.01	1.6724	1695.01	3.22507
1695.97	1.76942	1695.97	3.28509
1696.94	1.86418	1696.94	3.19232
1697.9	1.85983	1697.9	3.05507
1698.87	1.65035	1698.87	2.9054
1699.83	1.40776	1699.83	2.78522
1700.79	1.42884	1700.79	2.86066
1701.76	1.54805	1701.76	2.98434
1702.72	1.54798	1702.72	2.87024
1703.69	1.47194	1703.69	2.57647
1704.65	1.57873	1704.65	2.69359
1705.62	1.85525	1705.62	3.21155
1706.58	1.81637	1706.58	3.46455
1707.54	1.47818	1707.54	3.38338
1708.51	1.2636	1708.51	3.26023
1709.47	1.53762	1709.47	3.29896
1710.44	1.71197	1710.44	3.3016
1711.4	1.63969	1711.4	3.18213
1712.36	1.51844	1712.36	3.0613
1713.33	1.43118	1713.33	3.03045
1714.29	1.39195	1714.29	3.04377
1715.26	1.46319	1715.26	3.00097
1716.22	1.54639	1716.22	2.94111
1717.18	1.51048	1717.18	2.91227
1718.15	1.41141	1718.15	2.95218
1719.11	1.4483	1719.11	3.20638
1720.08	1.60633	1720.08	3.65596
1721.04	1.54134	1721.04	3.62168
1722.01	1.27151	1722.01	3.09195
1722.97	1.05963	1722.97	2.64079
1723.93	1.05637	1723.93	2.70525
1724.9	1.07801	1724.9	2.71046
1725.86	1.04726	1725.86	2.43502
1726.83	1.14776	1726.83	2.35126
1727.79	1.53028	1727.79	2.83848
1728.76	1.88905	1728.76	3.44369
1729.72	1.69117	1729.72	3.43379
1730.68	1.34723	1730.68	3.15427
1731.65	1.35681	1731.65	3.02261
1732.61	1.54688	1732.61	3.01911
1733.58	1.43467	1733.58	2.89914
1734.54	1.06462	1734.54	2.67725
1735.51	0.936118	1735.51	2.65948
1736.47	1.00715	1736.47	2.80331
1737.43	1.02261	1737.43	2.76717
1738.4	0.843669	1738.4	2.11752
1739.36	0.738293	1739.36	1.84584
1740.33	0.732404	1740.33	2.14876
1741.29	0.842648	1741.29	2.48028
1742.26	1.11224	1742.26	2.61184
1743.22	1.32077	1743.22	2.55098
1744.18	1.15989	1744.18	2.06398
1745.15	0.913416	1745.15	1.60693
1746.11	0.751712	1746.11	1.68791
1747.08	0.694678	1747.08	2.04988
1748.04	0.848792	1748.04	2.25906
1749.01	1.11447	1749.01	2.31896
1749.97	1.06236	1749.97	2.19791
1750.93	0.79992	1750.93	1.96786
1751.9	0.632926	1751.9	1.85727
1752.86	0.658247	1752.86	2.00388
1753.83	0.759803	1753.83	2.12941
1754.79	0.946126	1754.79	2.22612
1755.76	0.993835	1755.76	2.21942
1756.72	0.829001	1756.72	2.07336
1757.68	0.674445	1757.68	1.9485
1758.65	0.716598	1758.65	2.00683
1759.61	0.747249	1759.61	2.01663
1760.58	0.673558	1760.58	1.82398
1761.54	0.562736	1761.54	1.59369
1762.5	0.503667	1762.5	1.64329
1763.47	0.476645	1763.47	1.81014
1764.43	0.366338	1764.43	1.65512
1765.4	0.245438	1765.4	1.30279
1766.36	0.324969	1766.36	1.15376
1767.33	0.606704	1767.33	1.27224
1768.29	0.641134	1768.29	1.30626
1769.25	0.475913	1769.25	1.28042
1770.22	0.480876	1770.22	1.39914
1771.18	0.739593	1771.18	1.74128
1772.15	0.897064	1772.15	2.00799
1773.11	0.758499	1773.11	2.13485
1774.08	0.550444	1774.08	2.00182
1775.04	0.266281	1775.04	1.4926
1776	0.102035	1776	1.07198
1776.97	0.405817	1776.97	1.45573
1777.93	0.705057	1777.93	1.91161
1778.9	0.492681	1778.9	1.63074
1779.86	0.173306	1779.86	1.12592
1780.83	0.127441	1780.83	1.03478
1781.79	0.270203	1781.79	1.24653
1782.75	0.352948	1782.75	1.21213
1783.72	0.389868	1783.72	1.04584
1784.68	0.425195	1784.68	1.09752
1785.65	0.457931	1785.65	1.43871
1786.61	0.389238	1786.61	1.42118
1787.57	0.183356	1787.57	0.91766
1788.54	0.203491	1788.54	0.8399
1789.5	0.469264	1789.5	1.31681
1790.47	0.704129	1790.47	1.76447
1791.43	0.760656	1791.43	1.81152
1792.4	0.717438	1792.4	1.69983
1793.36	0.557957	1793.36	1.45193
1794.32	0.43581	1794.32	1.25477
1795.29	0.445374	1795.29	1.25387
1796.25	0.484792	1796.25	1.31778
1797.22	0.364842	1797.22	1.2024
1798.18	0.251019	1798.18	1.07793
1799.14	0.403654	1799.14	1.23812
1800.11	0.646725	1800.11	1.53787
1801.07	0.577978	1801.07	1.50939
1802.04	0.279733	1802.04	1.21747
1803	0.0283415	1803	0.89791
1803.97	-0.149857	1803.97	0.59806
1804.93	-0.251878	1804.93	0.38567
1805.89	-0.296567	1805.89	0.21673
1806.86	-0.190194	1806.86	0.31397
1807.82	0.0717659	1807.82	0.69982
1808.79	0.225169	1808.79	1.04592
1809.75	0.119712	1809.75	1.16783
1810.72	0.0624219	1810.72	1.23406
1811.68	0.360112	1811.68	1.38614
1812.64	0.530581	1812.64	1.44635
1813.61	0.424001	1813.61	1.34047
1814.57	0.198055	1814.57	1.13236
1815.54	-0.0653467	1815.54	0.77235
1816.5	-0.250119	1816.5	0.48378
1817.47	-0.156014	1817.47	0.63196
1818.43	0.0337988	1818.43	0.97086
1819.39	0.0642481	1819.39	1.04215
1820.36	-0.027111	1820.36	0.89
1821.32	-0.0795101	1821.32	0.74415
1822.29	-0.0829655	1822.29	0.64445
1823.25	0.000693359	1823.25	0.70718
1824.21	0.192406	1824.21	1.02132
1825.18	0.342949	1825.18	1.22299
1826.14	0.448556	1826.14	1.3028
1827.11	0.415625	1827.11	1.28882
1828.07	0.230636	1828.07	1.19099
1829.04	0.0324642	1829.04	1.01341
1830	-0.13036	1830	0.68895
1830.96	-0.219448	1830.96	0.41221
1831.93	-0.217702	1831.93	0.19633
1832.89	-0.262188	1832.89	0.06287
1833.86	-0.611318	1833.86	0.00557
1834.82	-0.820912	1834.82	0.08503
1835.79	-0.18981	1835.79	0.61711
1836.75	0.415063	1836.75	1.06767
1837.71	0.284396	1837.71	0.85107
1838.68	-0.189943	1838.68	0.29523
1839.64	-0.0500212	1839.64	0.47312
1840.61	0.314163	1840.61	0.96419
1841.57	0.179102	1841.57	0.91604
1842.54	-0.322279	1842.54	0.35879
1843.5	-0.284616	1843.5	0.43965
1844.46	0.248433	1844.46	1.12736
1845.43	0.301004	1845.43	1.2719
1846.39	-0.0807503	1846.39	0.84601
1847.36	-0.387371	1847.36	0.49854
1848.32	-0.416641	1848.32	0.64104
1849.29	-0.327417	1849.29	0.66056
1850.25	-0.101947	1850.25	0.52209
1851.21	0.0353288	1851.21	0.48543
1852.18	-0.023514	1852.18	0.72191
1853.14	-0.094196	1853.14	0.89446
1854.11	-0.0097168	1854.11	0.74145
1855.07	0.0420833	1855.07	0.52519
1856.04	-0.00589193	1856.04	0.30719
1857	-0.0996403	1857	0.14328
1857.96	-0.224797	1857.96	0.13906
1858.93	-0.312772	1858.93	0.215
1859.89	-0.231418	1859.89	0.33909
1860.86	-0.126512	1860.86	0.44751
1861.82	-0.156484	1861.82	0.46975
1862.79	-0.284707	1862.79	0.41873
1863.75	-0.502739	1863.75	0.24766
1864.71	-0.696408	1864.71	0.03288
1865.68	-0.559233	1865.68	-0.02267
1866.64	-0.102079	1866.64	0.12259
1867.61	0.0943424	1867.61	0.37807
1868.57	0.0444564	1868.57	0.70112
1869.53	-0.0847494	1869.53	0.80084
1870.5	-0.255811	1870.5	0.63177
1871.46	-0.403737	1871.46	0.27366
1872.43	-0.571623	1872.43	-0.53625
1873.39	-0.474805	1873.39	-0.65305
1874.36	-0.0887158	1874.36	0.091
1875.32	0.125101	1875.32	0.71266
1876.28	-0.259533	1876.28	0.32585
1877.25	-0.523537	1877.25	-0.07206
1878.21	-0.315187	1878.21	-0.10783
1879.18	-0.116071	1879.18	-0.02705
1880.14	-0.136585	1880.14	0.07471
1881.11	-0.179565	1881.11	0.20513
1882.07	0.0690413	1882.07	0.47738
1883.03	0.285879	1883.03	0.63846
1884	0.202682	1884	0.38277
1884.96	-0.00121908	1884.96	-0.00409
1885.93	-0.0793945	1885.93	0.0293
1886.89	-0.0994499	1886.89	0.28487
1887.86	-0.224502	1887.86	0.38269
1888.82	-0.383403	1888.82	0.32867
1889.78	-0.402261	1889.78	0.21366
1890.75	-0.303556	1890.75	0.04323
1891.71	-0.407217	1891.71	-0.06485
1892.68	-0.622243	1892.68	-0.09507
1893.64	-0.708547	1893.64	-0.03772
1894.6	-0.616162	1894.6	0.12275
1895.57	-0.540819	1895.57	0.1021
1896.53	-0.482077	1896.53	-0.10653
1897.5	-0.405994	1897.5	-0.17273
1898.46	-0.318376	1898.46	-0.03427
1899.43	-0.313578	1899.43	0.031
1900.39	-0.612676	1900.39	-0.324
1901.35	-0.606494	1901.35	-0.32489
1902.32	-0.209696	1902.32	0.17824
1903.28	0.0467855	1903.28	0.57049
1904.25	-0.300101	1904.25	0.16004
1905.21	-0.56847	1905.21	-0.15233
1906.17	-0.280986	1906.17	0.26956
1907.14	-0.0276367	1907.14	0.69663
1908.1	-0.0468636	1908.1	0.78624
1909.07	-0.192746	1909.07	0.64955
1910.03	-0.36266	1910.03	0.26288
1911	-0.47095	1911	-0.0741
1911.96	-0.422353	1911.96	-0.02395
1912.92	-0.32952	1912.92	0.17229
1913.89	-0.392751	1913.89	-0.00591
1914.85	-0.477178	1914.85	-0.28209
1915.82	-0.223245	1915.82	0.05243
1916.78	0.114971	1916.78	0.66762
1917.75	0.0422982	1917.75	0.66238
1918.71	-0.368665	1918.71	0.07297
1919.67	-0.630612	1919.67	-0.3512
1920.64	-0.74124	1920.64	-0.59441
1921.6	-0.67007	1921.6	-0.61782
1922.57	-0.416226	1922.57	-0.39407
1923.53	-0.291372	1923.53	-0.07315
1924.5	-0.27668	1924.5	0.34989
1925.46	-0.239731	1925.46	0.35374
1926.42	-0.168382	1926.42	-0.16562
1927.39	-0.167816	1927.39	-0.54004
1928.35	-0.306787	1928.35	-0.50356
1929.32	-0.441318	1929.32	-0.44195
1930.28	-0.55562	1930.28	-0.37979
1931.24	-0.630545	1931.24	-0.34585
1932.21	-0.599688	1932.21	-0.36911
1933.17	-0.720174	1933.17	-0.48471
1934.14	-1.13485	1934.14	-0.71903
1935.1	-1.33126	1935.1	-0.89916
1936.07	-1.07054	1936.07	-0.98474
1937.03	-0.680905	1937.03	-0.87232
1937.99	-0.268714	1937.99	-0.1296
1938.96	-0.0890316	1938.96	0.40466
1939.92	-0.302231	1939.92	0.2456
1940.89	-0.624124	1940.89	-0.24251
1941.85	-0.685822	1941.85	-0.66215
1942.82	-0.698545	1942.82	-0.97251
1943.78	-0.911287	1943.78	-1.08706
1944.74	-1.12043	1944.74	-1.06732
1945.71	-1.10995	1945.71	-0.9392
1946.67	-0.993965	1946.67	-0.7891
1947.64	-1.03935	1947.64	-0.87704
1948.6	-1.11412	1948.6	-1.03946
1949.57	-1.0042	1949.57	-0.98091
1950.53	-0.776792	1950.53	-0.73929
1951.49	-0.623444	1951.49	-0.43564
1952.46	-0.573929	1952.46	-0.19712
1953.42	-0.738451	1953.42	-0.44581
1954.39	-1.03939	1954.39	-1.10968
1955.35	-1.13529	1955.35	-1.16205
1956.32	-1.04914	1956.32	-0.65463
1957.28	-0.88284	1957.28	-0.19083
1958.24	-0.672943	1958.24	0.15316
1959.21	-0.593743	1959.21	0.14634
1960.17	-0.739188	1960.17	-0.4862
1961.14	-0.833981	1961.14	-0.85526
1962.1	-0.877368	1962.1	-0.95042
1963.07	-0.921712	1963.07	-0.93885
1964.03	-0.979881	1964.03	-0.81935
1964.99	-1.14607	1964.99	-0.97324
1965.96	-1.48908	1965.96	-1.55741
1966.92	-1.48816	1966.92	-1.6661
1967.89	-1.03295	1967.89	-1.01497
1968.85	-0.624041	1968.85	-0.36025
1969.82	-0.598058	1969.82	-0.12487
1970.78	-0.593475	1970.78	-0.10781
1971.74	-0.555329	1971.74	-0.29097
1972.71	-0.58848	1972.71	-0.55547
1973.67	-0.87939	1973.67	-0.95521
1974.64	-1.05279	1974.64	-1.17031
1975.6	-0.926911	1975.6	-1.02247
1976.56	-0.669167	1976.56	-0.69071
[truncated: 1,372 more rows]

## Sheet: Figure 2b
FC2_air			magnetite			graphite
20.0061	244.725		30.11	28.1		26.63	100
20.016	178.241		35.46	100		42.5	4.61
20.0258	116.89		37.09	8.27		44.7	15.06
20.0357	66.2991		43.1	20.13		50.86	4.46
20.0455	30.5232		53.47	9.59		54.84	6.55
20.0554	11.5062		57	24.94
20.0652	8.94913		27	6.4
20.0751	20.5801
20.0849	42.7338
20.0948	71.0959
20.1046	101.455
20.1145	130.319
20.1243	155.302
20.1341	175.25
20.144	190.11
20.1538	200.627
20.1637	207.954
20.1735	213.263
20.1834	217.451
20.1932	220.974
20.2031	223.845
20.2129	225.744
20.2228	226.235
20.2326	224.985
20.2425	221.958
20.2523	217.526
20.2622	212.463
20.272	207.834
20.2819	204.806
20.2917	204.41
20.3016	207.317
20.3114	213.678
20.3212	223.056
20.3311	234.466
20.3409	246.535
20.3508	257.728
20.3606	266.632
20.3705	272.217
20.3803	274.054
20.3902	272.428
20.4	268.328
20.4099	263.31
20.4197	259.242
20.4296	257.974
20.4394	260.981
20.4493	269.058
20.4591	282.11
20.469	299.111
20.4788	318.23
20.4887	337.137
20.4985	353.414
20.5084	365.004
20.5182	370.615
20.5281	369.961
20.5379	363.82
20.5478	353.857
20.5576	342.286
20.5674	331.418
20.5773	323.227
20.5871	319.013
20.597	319.257
20.6068	323.662
20.6167	331.374
20.6265	341.294
20.6364	352.378
20.6462	363.85
20.6561	375.266
20.6659	386.426
20.6758	397.191
20.6856	407.277
20.6955	416.119
20.7053	422.869
20.7152	426.545
20.725	426.284
20.7349	421.637
20.7447	412.805
20.7545	400.722
20.7644	386.97
20.7742	373.507
20.7841	362.315
20.7939	355.018
20.8038	352.609
20.8136	355.324
20.8235	362.691
20.8333	373.732
20.8432	387.222
20.853	401.947
20.8629	416.873
20.8727	431.21
20.8826	444.371
20.8924	455.89
20.9023	465.352
20.9121	472.374
20.922	476.677
20.9318	478.199
20.9417	477.21
20.9515	474.363
20.9613	470.637
20.9712	467.167
20.981	465.006
20.9909	464.885
21.0007	467.057
21.0106	471.291
21.0204	477.007
21.0303	483.535
21.0401	490.386
21.05	497.447
21.0598	505.012
21.0697	513.626
21.0795	523.781
21.0894	535.572
21.0992	548.431
21.1091	561.073
21.1189	571.689
21.1288	578.373
21.1386	579.664
21.1485	575.039
21.1583	565.193
21.1682	551.997
21.178	538.103
21.1879	526.308
21.1977	518.825
21.2075	516.702
21.2174	519.543
21.2272	525.654
21.2371	532.559
21.2469	537.76
21.2568	539.507
21.2666	537.35
21.2765	532.295
21.2863	526.512
21.2962	522.674
21.306	523.119
21.3159	529.09
21.3257	540.285
21.3356	554.851
21.3454	569.838
21.3553	581.981
21.3651	588.581
21.375	588.228
21.3848	581.157
21.3946	569.143
21.4045	554.969
21.4143	541.635
21.4242	531.541
21.434	525.885
21.4439	524.445
21.4537	525.785
21.4636	527.806
21.4734	528.47
21.4833	526.456
21.4931	521.573
21.503	514.793
21.5128	507.933
21.5227	503.08
21.5325	501.949
21.5424	505.369
21.5522	513.039
21.5621	523.627
21.5719	535.142
21.5818	545.481
21.5916	552.97
21.6014	556.742
21.6113	556.872
21.6212	554.238
21.631	550.186
21.6408	546.106
21.6507	543.064
21.6605	541.578
21.6704	541.589
21.6802	542.609
21.6901	543.965
21.6999	545.056
21.7098	545.528
21.7196	545.332
21.7295	544.657
21.7393	543.789
21.7492	542.967
21.759	542.283
21.7689	541.682
21.7787	541.032
21.7886	540.244
21.7984	539.372
21.8083	538.643
21.8181	538.394
21.828	538.931
21.8378	540.349
21.8477	542.399
21.8575	544.452
21.8673	545.599
21.8772	544.869
21.887	541.531
21.8969	535.362
21.9067	526.829
21.9166	517.085
21.9264	507.796
21.9363	500.8
21.9461	497.713
21.956	499.558
21.9658	506.538
21.9757	518.002
21.9855	532.606
21.9954	548.639
22.0052	564.404
22.0151	578.565
22.0249	590.356
22.0347	599.625
22.0446	606.702
22.0544	612.159
22.0643	616.539
22.0741	620.15
22.084	622.987
22.0938	624.793
22.1037	625.233
22.1135	624.126
22.1234	621.626
22.1332	618.313
22.1431	615.132
22.1529	613.207
22.1628	613.577
22.1726	616.922
22.1825	623.381
22.1923	632.488
22.2022	643.267
22.212	654.441
22.2219	664.7
22.2317	672.954
22.2416	678.498
22.2514	681.066
22.2613	680.765
22.2711	677.934
22.281	672.985
22.2908	666.283
22.3006	658.101
22.3105	648.658
22.3203	638.205
22.3302	627.125
22.34	615.986
22.3499	605.516
22.3597	596.503
22.3696	589.637
22.3794	585.356
22.3893	583.73
22.3991	584.446
22.409	586.885
22.4188	590.271
22.4287	593.85
22.4385	597.042
22.4484	599.515
22.4582	601.172
22.4681	602.068
22.4779	602.299
22.4877	601.921
22.4976	600.932
22.5074	599.343
22.5173	597.29
22.5271	595.156
22.537	593.607
22.5468	593.519
22.5567	595.761
22.5665	600.896
22.5764	608.876
22.5862	618.842
22.5961	629.135
22.6059	637.553
22.6158	641.838
22.6256	640.286
22.6355	632.324
22.6453	618.877
22.6552	602.4
22.665	586.505
22.6748	575.244
22.6847	572.192
22.6945	579.557
22.7044	597.534
22.7142	624.092
22.7241	655.271
22.7339	685.933
22.7438	710.803
22.7536	725.573
22.7635	727.786
22.7733	717.315
22.7832	696.336
22.793	668.802
22.8029	639.58
22.8127	613.45
22.8226	594.204
22.8324	584.034
22.8423	583.315
22.8521	590.768
22.862	603.932
22.8718	619.78
22.8817	635.321
22.8915	648.076
22.9014	656.347
22.9112	659.296
22.9211	656.88
22.9309	649.716
22.9407	638.946
22.9506	626.132
22.9604	613.16
22.9703	602.136
22.9801	595.203
22.99	594.271
22.9998	600.676
23.0097	614.816
23.0195	635.873
23.0294	661.718
23.0392	689.071
23.0491	713.93
23.0589	732.23
23.0688	740.595
23.0786	737.039
23.0885	721.435
23.0983	695.654
23.1081	663.301
23.118	629.096
23.1278	598.026
23.1377	574.444
23.1475	561.295
23.1574	559.648
23.1672	568.61
23.1771	585.633
23.1869	607.125
23.1968	629.226
23.2066	648.557
23.2165	662.8
23.2263	670.981
23.2362	673.431
23.246	671.472
23.2559	666.923
23.2657	661.567
23.2756	656.725
23.2854	653.025
23.2953	650.402
23.3051	648.317
23.315	646.098
23.3248	643.299
23.3346	639.965
23.3445	636.725
23.3544	634.684
23.3642	635.148
23.374	639.25
23.3839	647.603
23.3937	660.053
23.4036	675.616
23.4134	692.621
23.4233	709.005
23.4331	722.705
23.443	732.026
23.4528	735.919
23.4627	734.091
23.4725	726.943
23.4824	715.382
23.4922	700.563
23.5021	683.651
23.5119	665.668
23.5218	647.451
23.5316	629.718
23.5415	613.181
23.5513	598.651
23.5612	587.059
23.571	579.37
23.5808	576.392
23.5907	578.531
23.6005	585.576
23.6104	596.596
23.6202	610
23.6301	623.79
23.6399	635.955
23.6498	644.926
23.6596	649.969
23.6695	651.421
23.6793	650.675
23.6892	649.914
23.699	651.633
23.7089	658.05
23.7187	670.549
23.7286	689.283
23.7384	713.038
23.7482	739.399
23.7581	765.188
23.7679	787.076
23.7778	802.239
23.7876	808.913
23.7975	806.723
23.8073	796.707
23.8172	781.058
23.827	762.607
23.8369	744.209
23.8467	728.141
23.8566	715.669
23.8664	706.876
23.8763	700.8
23.8861	695.829
23.896	690.281
23.9058	682.994
23.9157	673.793
23.9255	663.695
23.9354	654.781
23.9452	649.749
23.9551	651.234
23.9649	661.072
23.9748	679.675
23.9846	705.7
23.9945	736.122
24.0043	766.717
24.0141	792.874
24.024	810.547
24.0338	817.139
24.0437	812.084
24.0535	796.992
24.0634	775.302
24.0732	751.523
24.0831	730.245
24.0929	715.147
24.1028	708.258
24.1126	709.624
24.1225	717.463
24.1323	728.739
24.1422	739.997
24.152	748.234
24.1619	751.581
24.1717	749.645
24.1816	743.433
24.1914	734.933
24.2013	726.471
24.2111	720.052
24.2209	716.853
24.2308	716.991
24.2406	719.606
24.2505	723.197
24.2603	726.098
24.2702	726.946
24.28	725.024
24.2899	720.397
24.2997	713.841
24.3096	706.613
24.3194	700.139
24.3293	695.716
24.3391	694.283
24.349	696.299
24.3588	701.701
24.3687	709.946
24.3785	720.08
24.3884	730.843
24.3982	740.805
24.408	748.536
24.4179	752.834
24.4277	752.973
24.4376	748.936
24.4474	741.556
24.4573	732.502
24.4671	724.055
24.477	718.683
24.4868	718.496
24.4967	724.689
24.5065	737.136
24.5164	754.267
24.5262	773.283
24.5361	790.709
24.5459	803.159
24.5558	808.122
24.5656	804.578
24.5755	793.267
24.5853	776.535
24.5952	757.785
24.605	740.687
24.6149	728.349
24.6247	722.665
24.6346	724.016
24.6444	731.367
24.6542	742.723
24.6641	755.778
24.6739	768.563
24.6838	779.907
24.6936	789.576
24.7035	798.103
24.7133	806.366
24.7232	815.09
24.733	824.436
24.7429	833.815
24.7527	841.981
24.7626	847.364
24.7724	848.532
24.7823	844.623
24.7921	835.63
24.802	822.442
24.8118	806.655
24.8217	790.218
24.8315	775.032
24.8413	762.617
24.8512	753.916
24.861	749.274
24.8709	748.538
24.8807	751.211
24.8906	756.584
24.9004	763.81
24.9103	771.896
24.9201	779.692
24.93	785.912
24.9398	789.266
24.9497	788.688
24.9595	783.643
24.9694	774.391
24.9792	762.125
24.9891	748.871
24.9989	737.137
25.0088	729.37
25.0186	727.345
25.0285	731.66
25.0383	741.501
25.0481	754.775
25.058	768.594
25.0678	780.013
25.0777	786.8
25.0875	788.039
25.0974	784.377
25.1072	777.824
25.1171	771.164
25.1269	767.131
25.1368	767.588
25.1466	772.958
25.1565	782.058
25.1663	792.42
25.1762	800.983
25.186	804.982
25.1959	802.771
25.2057	794.353
25.2156	781.462
25.2254	767.185
25.2353	755.226
25.2451	749.02
25.255	750.934
25.2648	761.754
25.2747	780.576
25.2845	805.084
25.2944	832.124
25.3042	858.382
25.314	880.994
25.3239	897.941
25.3337	908.19
25.3436	911.585
25.3534	908.611
25.3633	900.14
25.3731	887.252
25.383	871.195
25.3928	853.431
25.4027	835.719
25.4125	820.116
25.4224	808.84
25.4322	803.961
25.4421	806.979
25.4519	818.403
25.4618	837.458
25.4716	862.044
25.4814	889.001
25.4913	914.651
25.5011	935.512
25.511	949.006
25.5208	953.98
25.5307	950.914
25.5405	941.736
25.5504	929.307
25.5602	916.698
25.5701	906.436
25.5799	899.943
25.5898	897.27
25.5996	897.222
25.6095	897.8
25.6193	896.842
25.6292	892.679
25.639	884.622
25.6489	873.149
25.6587	859.748
25.6686	846.479
25.6784	835.361
25.6883	827.787
25.6981	824.123
25.708	823.597
25.7178	824.532
25.7276	824.836
25.7375	822.635
25.7473	816.866
25.7572	807.655
25.767	796.393
25.7769	785.456
25.7867	777.647
25.7966	775.497
25.8064	780.597
25.8163	793.127
25.8261	811.72
25.836	833.679
25.8458	855.515
25.8557	873.661
25.8655	885.212
25.8754	888.498
25.8852	883.374
25.8951	871.16
25.9049	854.266
25.9148	835.602
25.9246	817.922
25.9344	803.261
25.9443	792.596
25.9541	785.797
25.964	781.849
25.9738	779.285
25.9837	776.684
25.9935	773.122
26.0034	768.435
26.0132	763.265
26.0231	758.859
26.0329	756.704
26.0428	758.089
26.0526	763.719
26.0625	773.463
26.0723	786.32
26.0822	800.58
26.092	814.16
26.1019	825.021
26.1117	831.569
26.1215	832.965
26.1314	829.265
26.1412	821.387
26.1511	810.912
26.1609	799.783
26.1708	789.956
26.1806	783.081
26.1905	780.275
26.2003	782.001
26.2102	788.076
26.22	797.775
26.2299	810.006
26.2397	823.502
26.2496	836.995
26.2594	849.346
26.2693	859.608
26.2791	867.042
26.289	871.076
26.2988	871.266
26.3087	867.258
26.3185	858.785
26.3284	845.709
26.3382	828.096
26.3481	806.319
26.3579	781.144
26.3678	753.785
26.3776	725.89
26.3874	699.448
26.3973	676.613
26.4071	659.472
26.417	649.781
26.4268	648.721
26.4367	656.706
26.4465	673.289
26.4564	697.166
26.4662	726.304
26.4761	758.15
26.4859	789.905
26.4958	818.828
26.5056	842.518
26.5155	859.15
26.5253	867.643
26.5352	867.735
26.545	859.965
26.5548	845.574
26.5647	826.321
26.5745	804.252
26.5844	781.443
26.5942	759.741
26.6041	740.557
26.6139	724.72
26.6238	712.431
26.6336	703.314
26.6435	696.563
26.6533	691.154
26.6632	686.08
26.673	680.56
26.6829	674.204
26.6927	667.071
26.7026	659.643
26.7124	652.72
26.7223	647.257
26.7321	644.188
26.742	644.271
26.7518	647.976
26.7616	655.417
26.7715	666.336
26.7813	680.121
26.7912	695.842
26.8011	712.304
26.8109	728.125
26.8207	741.836
26.8306	752.036
26.8404	757.572
26.8503	757.749
26.8601	752.521
26.87	742.607
26.8798	729.49
26.8897	715.259
26.8995	702.284
26.9094	692.787
26.9192	688.365
26.9291	689.587
26.9389	695.77
26.9488	705.008
26.9586	714.488
26.9685	721.045
26.9783	721.855
26.9882	715.115
26.998	700.559
27.0079	679.665
27.0177	655.493
27.0275	632.163
27.0374	614.072
27.0472	604.998
27.0571	607.305
27.0669	621.39
27.0768	645.528
27.0866	676.136
27.0965	708.407
27.1063	737.194
27.1162	757.965
27.126	767.628
27.1359	765.084
27.1457	751.392
27.1556	729.542
27.1654	703.871
27.1753	679.263
27.1851	660.277
27.1949	650.365
27.2048	651.309
27.2146	662.982
27.2245	683.431
27.2343	709.281
27.2442	736.35
27.254	760.375
27.2639	777.722
27.2737	785.949
27.2836	784.149
27.2934	773.006
27.3033	754.589
27.3131	731.9
27.323	708.289
27.3328	686.836
27.3427	669.81
27.3525	658.314
27.3624	652.167
27.3722	650.064
27.3821	649.944
27.3919	649.525
27.4018	646.858
27.4116	640.81
27.4215	631.352
27.4313	619.59
27.4412	607.539
27.451	597.665
27.4608	592.314
27.4707	593.137
27.4805	600.649
27.4904	614.032
27.5002	631.229
27.5101	649.332
27.5199	665.173
27.5298	676.015
27.5396	680.171
27.5495	677.409
27.5593	669.051
27.5692	657.712
27.579	646.726
27.5889	639.389
27.5987	638.159
27.6086	644.03
27.6184	656.209
27.6283	672.203
27.6381	688.317
27.648	700.453
27.6578	705.058
27.6676	699.983
27.6775	685.064
27.6873	662.264
27.6972	635.337
27.707	609.057
27.7169	588.207
27.7267	576.525
27.7366	575.888
27.7464	585.896
27.7563	603.994
27.7661	626.076
27.776	647.466
27.7858	664.013
27.7957	673.061
27.8055	674.062
27.8154	668.676
27.8252	660.354
27.835	653.49
27.8449	652.364
27.8547	660.112
27.8646	677.969
27.8744	704.954
27.8843	738.052
27.8941	772.84
27.904	804.393
27.9138	828.262
27.9237	841.302
27.9335	842.178
27.9434	831.467
27.9532	811.371
27.9631	785.127
27.9729	756.293
27.9828	728.056
27.9926	702.731
28.0025	681.524
28.0123	664.585
28.0222	651.293
28.032	640.688
28.0419	631.911
28.0517	624.55
28.0616	618.806
28.0714	615.458
28.0813	615.625
28.0911	620.414
28.1009	630.526
28.1108	645.93
28.1206	665.697
28.1305	688.025
28.1403	710.491
28.1502	730.466
28.16	745.622
28.1699	754.41
28.1797	756.416
28.1896	752.475
28.1994	744.525
28.2093	735.201
28.2191	727.257
28.229	722.942
28.2388	723.467
28.2487	728.713
28.2585	737.255
28.2684	746.7
28.2782	754.286
28.288	757.58
28.2979	755.111
28.3077	746.769
28.3176	733.861
28.3274	718.81
28.3373	704.559
28.3471	693.84
28.357	688.505
28.3668	689.086
28.3767	694.718
28.3865	703.428
28.3964	712.726
28.4062	720.317
28.4161	724.749
28.4259	725.81
28.4358	724.565
28.4456	723.031
28.4555	723.572
28.4653	728.202
28.4752	737.978
28.485	752.666
28.4948	770.759
28.5047	789.85
28.5145	807.252
28.5244	820.688
28.5342	828.877
28.5441	831.843
28.5539	830.894
28.5638	828.263
28.5736	826.53
28.5835	827.976
28.5933	834.022
28.6032	844.897
28.613	859.598
28.6229	876.121
28.6327	891.895
28.6426	904.301
28.6524	911.157
28.6623	911.065
28.6721	903.582
28.682	889.208
28.6918	869.228
28.7017	845.469
28.7115	820.043
28.7214	795.101
28.7312	772.639
28.741	754.356
28.7509	741.55
28.7607	735.046
28.7706	735.164
28.7804	741.706
28.7903	753.999
28.8001	770.979
28.81	791.324
28.8198	813.611
28.8297	836.483
28.8395	858.791
28.8494	879.685
28.8592	898.65
28.8691	915.489
28.8789	930.263
28.8888	943.221
28.8986	954.737
28.9085	965.253
28.9183	975.246
28.9281	985.189
28.938	995.508
28.9478	1006.51
28.9577	1018.32
28.9675	1030.81
28.9774	1043.54
28.9872	1055.85
28.9971	1066.91
29.0069	1075.94
29.0168	1082.4
29.0266	1086.16
29.0365	1087.66
29.0463	1087.87
29.0562	1088.16
29.066	1090.08
29.0759	1094.98
29.0857	1103.8
29.0956	1116.74
29.1054	1133.3
29.1153	1152.26
29.1251	1171.99
29.1349	1190.77
29.1448	1207.09
29.1547	1219.99
29.1645	1229.16
29.1743	1234.98
29.1842	1238.35
29.194	1240.49
29.2039	1242.64
29.2137	1245.85
29.2236	1250.77
29.2334	1257.68
29.2433	1266.45
29.2531	1276.69
29.263	1287.85
29.2728	1299.38
29.2827	1310.7
29.2925	1321.28
29.3024	1330.57
29.3122	1338.01
29.3221	1342.96
29.3319	1344.81
29.3418	1343.01
29.3516	1337.29
29.3615	1327.72
29.3713	1314.88
29.3812	1299.83
29.391	1284.09
29.4008	1269.35
29.4107	1257.31
29.4205	1249.26
29.4304	1245.91
29.4402	1247.2
29.4501	1252.28
29.4599	1259.7
29.4698	1267.71
29.4796	1274.64
29.4895	1279.26
29.4993	1281.05
29.5092	1280.34
29.519	1278.1
29.5289	1275.76
29.5387	1274.72
29.5486	1275.96
29.5584	1279.75
29.5682	1285.51
29.5781	1291.94
29.5879	1297.39
29.5978	1300.3
29.6076	1299.68
29.6175	1295.47
29.6273	1288.63
29.6372	1280.94
29.647	1274.62
29.6569	1271.71
29.6667	1273.49
29.6766	1280.16
29.6864	1290.68
29.6963	1303.02
29.7061	1314.67
29.716	1323.34
29.7258	1327.57
29.7357	1327.19
29.7455	1323.38
29.7554	1318.41
29.7652	1315.04
29.7751	1315.74
29.7849	1321.97
29.7948	1333.72
29.8046	1349.41
29.8145	1366.18
29.8243	1380.6
29.8341	1389.49
29.844	1390.72
29.8538	1383.8
29.8637	1369.99
29.8735	1352.07
29.8834	1333.68
29.8932	1318.48
29.9031	1309.28
29.9129	1307.49
29.9228	1312.78
29.9326	1323.27
29.9425	1336.02
29.9523	1347.8
29.9622	1355.8
29.972	1358.31
29.9819	1354.98
29.9917	1346.88
30.0016	1336.08
30.0114	1325.12
30.0212	1316.41
30.0311	1311.64
30.0409	1311.45
30.0508	1315.38
30.0606	1322.06
30.0705	1329.59
30.0803	1336.02
30.0902	1339.88
30.1	1340.44
30.1099	1337.91
30.1197	1333.37
30.1296	1328.5
30.1394	1325.21
30.1493	1325.25
30.1591	1329.78
30.169	1339.17
30.1788	1352.87
30.1887	1369.51
30.1985	1387.12
30.2083	1403.46
30.2182	1416.45
30.228	1424.45
30.2379	1426.61
30.2477	1422.9
30.2576	1414.16
30.2674	1401.85
30.2773	1387.83
30.2871	1374
30.297	1362
30.3068	1353
30.3167	1347.59
30.3265	1345.78
30.3364	1347.11
30.3462	1350.83
30.3561	1356.07
30.3659	1362.01
30.3758	1367.9
30.3856	1373.11
30.3955	1377.06
30.4053	1379.17
30.4152	1378.85
30.425	1375.53
30.4349	1368.75
30.4447	1358.36
30.4546	1344.68
30.4644	1328.56
30.4742	1311.43
30.4841	1295.14
30.4939	1281.69
30.5038	1272.89
30.5136	1269.94
30.5235	1273.22
30.5333	1282.06
30.5432	1294.89
30.553	1309.4
30.5629	1323.07
30.5727	1333.51
30.5826	1339.03
30.5924	1338.83
30.6023	1333.16
30.6121	1323.21
30.622	1310.73
30.6318	1297.72
30.6416	1285.95
30.6515	1276.62
30.6613	1270.25
30.6712	1266.61
30.681	1264.9
30.6909	1264.03
30.7007	1262.84
30.7106	1260.41
30.7204	1256.1
30.7303	1249.63
30.7401	1241.03
30.75	1230.47
30.7598	1218.22
30.7697	1204.59
30.7795	1189.88
30.7894	1174.52
30.7992	1159.08
30.8091	1144.29
30.8189	1131.03
30.8288	1120.18
30.8386	1112.47
30.8484	1108.26
30.8583	1107.41
30.8681	1109.2
30.878	1112.45
30.8879	1115.65
30.8977	1117.32
30.9075	1116.19
30.9174	1111.54
30.9272	1103.28
30.9371	1091.9
30.9469	1078.4
30.9568	1063.98
30.9666	1049.84
30.9765	1036.95
30.9863	1025.94
30.9962	1017.09
31.006	1010.41
31.0159	1005.79
31.0257	1003.15
31.0356	1002.44
31.0454	1003.72
31.0553	1007.03
31.0651	1012.29
31.075	1019.17
31.0848	1027.06
31.0947	1035.07
31.1045	1042.14
31.1143	1047.24
31.1242	1049.51
31.134	1048.47
31.1439	1044.08
31.1537	1036.77
31.1636	1027.32
31.1734	1016.72
31.1833	1006.05
31.1931	996.278
31.203	988.201
31.2128	982.344
31.2227	978.944
31.2325	977.923
31.2424	978.877
31.2522	981.061
31.2621	983.397
31.2719	984.531
31.2817	982.948
31.2916	977.182
31.3014	966.072
31.3113	949.047
31.3211	926.362
31.331	899.212
31.3408	869.678
31.3507	840.484
31.3605	814.589
31.3704	794.695
31.3802	782.762
31.3901	779.657
31.3999	784.998
31.4098	797.255
31.4196	814.068
31.4295	832.725
31.4393	850.668
31.4492	865.935
31.459	877.412
31.4689	884.882
31.4787	888.86
31.4886	890.293
31.4984	890.211
31.5083	889.438
31.5181	888.43
31.528	887.277
31.5378	885.827
31.5476	883.892
31.5575	881.435
31.5673	878.67
31.5772	876.041
31.587	874.08
31.5969	873.186
31.6067	873.416
31.6166	874.361
31.6264	875.155
31.6363	874.643
31.6461	871.658
31.656	865.354
31.6658	855.47
31.6757	842.474
31.6855	827.521
31.6954	812.229
31.7052	798.323
31.7151	787.251
31.7249	779.847
31.7347	776.15
31.7446	775.415
31.7544	776.306
31.7643	777.226
31.7741	776.701
31.784	773.706
31.7938	767.874
31.8037	759.545
31.8135	749.64
31.8234	739.433
31.8332	730.259
31.8431	723.263
31.8529	719.209
31.8628	718.415
31.8726	720.776
31.8825	725.859
31.8923	733.033
31.9022	741.569
31.912	750.712
31.9219	759.702
31.9317	767.768
31.9415	774.125
31.9514	777.991
31.9612	778.641
31.9711	775.498
31.9809	768.236
31.9908	756.866
32.0006	741.78
32.0105	723.735
32.0203	703.773
32.0302	683.102
32.04	662.956
32.0499	644.468
32.0597	628.587
32.0696	616.03
32.0794	607.272
32.0893	602.572
32.0991	601.978
32.109	605.341
32.1188	612.301
32.1287	622.275
32.1385	634.459
32.1484	647.858
32.1582	661.372
32.1681	673.911
32.1779	684.54
32.1877	692.609
32.1976	697.847
32.2074	700.381
32.2173	700.69
32.2271	699.493
32.237	697.603
32.2468	695.793
32.2567	694.699
32.2665	694.78
32.2764	696.34
32.2862	699.578
32.2961	704.644
32.3059	711.654
32.3158	720.657
32.3256	731.538
32.3355	743.903
32.3453	756.97
32.3552	769.539
32.365	780.064
32.3749	786.843
32.3847	788.318
32.3946	783.413
32.4044	771.849
32.4142	754.35
32.4241	732.668
32.4339	709.417
32.4438	687.71
32.4536	670.668
32.4635	660.899
32.4733	660.031
32.4832	668.414
32.493	685.048
32.5029	707.747
32.5127	733.518
32.5226	759.078
32.5324	781.405
32.5423	798.224
32.5521	808.336
32.562	811.735
32.5718	809.497
32.5817	803.484
32.5915	795.918
32.6013	788.918
32.6112	784.102
32.621	782.306
32.6309	783.493
32.6407	786.833
32.6506	790.957
32.6604	794.302
32.6703	795.488
32.6801	793.644
32.69	788.62
32.6998	781.046
32.7097	772.226
32.7195	763.888
32.7294	757.844
32.7392	755.621
32.7491	758.131
32.7589	765.465
32.7688	776.817
32.7786	790.602
32.7884	804.707
32.7983	816.872
32.8081	825.098
32.818	828.035
32.8278	825.247
32.8377	817.316
32.8475	805.744
32.8574	792.669
32.8672	780.451
32.8771	771.197
32.8869	766.343
32.8968	766.364
32.9066	770.707
32.9165	777.949
32.9263	786.16
32.9362	793.389
32.946	798.151
32.9559	799.806
32.9657	798.717
32.9756	796.153
32.9854	793.945
32.9953	793.989
33.0051	797.717
33.0149	805.69
33.0248	817.422
33.0346	831.491
33.0445	845.922
33.0543	858.735
33.0642	868.508
33.074	874.8
33.0839	878.298
33.0937	880.643
33.1036	883.963
33.1134	890.247
33.1233	900.728
33.1331	915.455
33.143	933.177
33.1528	951.595
33.1627	967.908
33.1725	979.518
33.1824	984.694
33.1922	983.017
33.2021	975.482
33.2119	964.22
33.2218	951.944
33.2316	941.26
33.2415	934.037
33.2513	931.03
33.2611	931.832
33.271	935.167
33.2808	939.419
33.2907	943.221
33.3005	945.939
33.3104	947.877
33.3202	950.169
33.3301	954.373
33.3399	961.912
33.3498	973.522
33.3596	988.89
33.3695	1006.59
33.3793	1024.32
33.3892	1039.48
33.399	1049.75
33.4089	1053.67
33.4187	1051.05
33.4286	1042.96
33.4384	1031.55
33.4483	1019.47
33.4581	1009.36
33.468	1003.24
33.4778	1002.21
33.4876	1006.32
33.4975	1014.73
33.5073	1026.03
33.5172	1038.71
33.527	1051.46
33.5369	1063.5
33.5467	1074.61
33.5566	1085.04
33.5664	1095.33
33.5763	1106.01
33.5861	1117.41
33.596	1129.5
33.6058	1141.87
33.6157	1153.85
33.6255	1164.61
33.6354	1173.42
33.6452	1179.85
33.6551	1183.89
33.6649	1186.06
33.6748	1187.37
33.6846	1189.2
33.6944	1193.14
33.7043	1200.71
33.7141	1213.14
33.724	1231.07
33.7338	1254.49
33.7437	1282.58
33.7535	1313.91
33.7634	1346.61
33.7732	1378.73
33.7831	1408.55
33.7929	1434.94
33.8028	1457.49
33.8126	1476.6
33.8225	1493.23
33.8323	1508.65
33.8422	1524.04
33.852	1540.15
33.8618	1557.09
33.8717	1574.29
33.8815	1590.65
33.8914	1604.89
33.9012	1615.91
33.9111	1623.2
33.9209	1627.03
33.9308	1628.49
33.9406	1629.29
33.9505	1631.44
33.9603	1636.79
33.9702	1646.62
33.98	1661.4
33.9899	1680.68
33.9997	1703.28
34.0096	1727.56
34.0194	1751.82
34.0293	1774.76
34.0391	1795.69
34.049	1814.73
34.0588	1832.63
34.0687	1850.61
34.0785	1869.98
34.0883	1891.75
34.0982	1916.38
34.108	1943.59
34.1179	1972.41
34.1277	2001.36
34.1376	2028.75
34.1474	2053.08
34.1573	2073.35
34.1671	2089.28
34.177	2101.45
34.1868	2111.14
34.1967	2120.13
34.2065	2130.34
34.2164	2143.44
34.2262	2160.49
34.2361	2181.77
34.2459	2206.7
34.2558	2233.9
34.2656	2261.51
34.2755	2287.49
34.2853	2309.98
34.2951	2327.62
34.305	2339.76
34.3148	2346.52
34.3247	2348.74
34.3345	2347.85
34.3444	2345.64
34.3542	2344.06
34.3641	2345
34.3739	2350.15
34.3838	2360.89
34.3936	2378.14
34.4035	2402.28
34.4133	2433.07
34.4232	2469.61
34.433	2510.27
34.4429	2552.87
34.4527	2594.82
34.4626	2633.44
34.4724	2666.36
34.4823	2691.87
34.4921	2709.22
34.502	2718.79
34.5118	2721.97
34.5217	2720.94
34.5315	2718.24
34.5414	2716.27
34.5512	2716.9
34.561	2721.2
34.5709	2729.38
34.5807	2740.97
34.5906	2755.1
34.6004	2770.9
34.6103	2787.78
34.6201	2805.55
34.63	2824.41
34.6398	2844.67
34.6497	2866.48
34.6595	2889.51
34.6694	2912.84
34.6792	2935
34.6891	2954.36
34.6989	2969.49
34.7088	2979.72
34.7186	2985.44
34.7285	2988.24
34.7383	2990.65
34.7482	2995.67
34.758	3005.97
34.7678	3023.27
34.7777	3047.72
34.7875	3077.79
34.7974	3110.41
34.8072	3141.67
34.8171	3167.67
34.8269	3185.43
34.8368	3193.69
34.8466	3193.27
34.8565	3186.97
34.8663	3179.04
34.8762	3174.24
34.886	3176.81
34.8959	3189.6
34.9057	3213.4
34.9156	3246.82
34.9254	3286.61
34.9353	3328.39
34.9451	3367.5
34.9549	3400
34.9648	3423.26
34.9746	3436.4
34.9845	3440.21
34.9943	3436.82
35.0042	3429.14
35.014	3420.23
35.0239	3412.86
35.0337	3409.15
35.0436	3410.49
35.0534	3417.67
35.0633	3430.96
35.0731	3450.31
35.083	3475.39
35.0928	3505.54
35.1027	3539.63
35.1125	3575.98
35.1224	3612.32
35.1322	3645.99
35.1421	3674.22
35.1519	3694.62
35.1617	3705.65
35.1716	3706.99
35.1814	3699.69
35.1913	3685.98
35.2011	3668.87
35.211	3651.5
35.2208	3636.52
35.2307	3625.51
35.2405	3618.78
35.2504	3615.38
35.2602	3613.57
35.2701	3611.35
35.2799	3607.16
35.2898	3600.34
35.2996	3591.4
35.3095	3581.86
35.3193	3573.92
35.3292	3569.8
35.339	3571.15
35.3489	3578.57
35.3587	3591.44
35.3685	3607.98
35.3784	3625.68
35.3882	3641.86
35.3981	3654.22
35.4079	3661.29
35.4178	3662.66
35.4276	3658.91
35.4375	3651.37
35.4473	3641.69
35.4572	3631.45
35.467	3621.83
35.4769	3613.4
35.4867	3606.18
35.4966	3599.72
35.5064	3593.35
35.5163	3586.37
35.5261	3578.27
35.536	3568.75
35.5458	3557.84
35.5557	3545.79
35.5655	3533.03
35.5754	3520.13
35.5852	3507.74
35.5951	3496.55
35.6049	3487.23
35.6148	3480.35
35.6246	3476.33
35.6344	3475.32
35.6443	3477.15
35.6541	3481.32
35.664	3487.04
35.6738	3493.33
35.6837	3499.17
35.6935	3503.62
35.7034	3505.96
35.7132	3505.71
35.7231	3502.59
35.7329	3496.51
35.7428	3487.42
35.7526	3475.34
35.7625	3460.31
35.7723	3442.52
35.7822	3422.35
35.792	3400.53
35.8019	3378.1
35.8117	3356.36
35.8216	3336.64
35.8314	3320.1
35.8412	3307.36
35.8511	3298.35
35.8609	3292.17
35.8708	3287.28
35.8806	3281.71
35.8905	3273.51
35.9003	3261.19
35.9102	3244.04
35.92	3222.34
35.9299	3197.33
35.9397	3170.94
35.9496	3145.39
35.9594	3122.76
35.9693	3104.52
35.9791	3091.32
35.989	3082.88
35.9988	3078.17
36.0087	3075.62
36.0185	3073.54
36.0284	3070.43
36.0382	3065.22
36.0481	3057.38
36.0579	3046.9
36.0677	3034.14
36.0776	3019.64
36.0874	3003.91
36.0973	2987.28
36.1071	2969.86
36.117	2951.48
36.1268	2931.82
36.1367	2910.5
36.1465	2887.13
36.1564	2861.5
36.1662	2833.55
36.1761	2803.44
36.1859	2771.56
36.1958	2738.5
36.2056	2705.03
36.2155	2672.07
36.2253	2640.58
36.2351	2611.54
36.245	2585.8
36.2548	2563.98
36.2647	2546.34
36.2745	2532.76
36.2844	2522.62
36.2942	2514.94
36.3041	2508.42
36.3139	2501.65
36.3238	2493.33
36.3336	2482.44
36.3435	2468.46
36.3533	2451.34
36.3632	2431.6
36.373	2410.08
36.3829	2387.85
36.3927	2365.9
36.4026	2344.97
36.4124	2325.37
36.4223	2307
36.4321	2289.37
36.442	2271.79
36.4518	2253.54
36.4616	2234.09
36.4715	2213.21
36.4813	2191.01
36.4912	2167.86
36.501	2144.23
36.5109	2120.5
36.5207	2096.86
36.5306	2073.25
36.5404	2049.38
36.5503	2024.96
36.5601	1999.87
36.57	1974.35
36.5798	1949.12
36.5897	1925.3
36.5995	1904.21
36.6094	1887.04
36.6192	1874.45
36.6291	1866.35
36.6389	1861.74
36.6488	1858.81
36.6586	1855.3
36.6684	1848.97
36.6783	1838.14
36.6882	1822.1
36.698	1801.34
36.7078	1777.44
36.7177	1752.69
36.7275	1729.57
36.7374	1710.09
36.7472	1695.24
36.7571	1684.79
36.7669	1677.25
36.7768	1670.28
36.7866	1661.22
36.7965	1647.8
36.8063	1628.66
36.8162	1603.73
36.826	1574.27
36.8359	1542.53
36.8457	1511.29
36.8556	1483.21
36.8654	1460.22
36.8753	1443.19
36.8851	1431.75
36.895	1424.48
36.9048	1419.31
36.9147	1413.99
36.9245	1406.67
36.9343	1396.22
36.9442	1382.43
36.954	1366.01
36.9639	1348.26
36.9737	1330.72
36.9836	1314.81
36.9934	1301.41
37.0033	1290.69
37.0131	1282.15
37.023	1274.72
37.0328	1267.12
37.0427	1258.16
37.0525	1247.14
37.0624	1234.02
37.0722	1219.46
37.0821	1204.71
37.0919	1191.31
37.1018	1180.69
37.1116	1173.81
37.1215	1170.82
37.1313	1171.01
37.1411	1172.84
37.151	1174.27
37.1608	1173.2
37.1707	1167.93
37.1805	1157.57
37.1904	1142.28
37.2002	1123.27
37.2101	1102.52
37.2199	1082.4
37.2298	1065.11
37.2396	1052.22
37.2495	1044.33
37.2593	1041.01
37.2692	1040.91
37.279	1042.16
37.2889	1042.81
37.2987	1041.32
37.3085	1036.87
37.3184	1029.51
37.3282	1020.08
37.3381	1009.92
37.3479	1000.52
37.3578	993.043
37.3676	988.089
37.3775	985.469
37.3873	984.248
37.3972	982.921
37.407	979.727
37.4169	973.006
37.4267	961.542
37.4366	944.826
37.4464	923.19
37.4563	897.812
37.4661	870.571
37.476	843.791
37.4858	819.906
37.4957	801.088
37.5055	788.906
37.5154	784.057
37.5252	786.244
37.535	794.216
37.5449	805.984
37.5547	819.188
37.5646	831.539
37.5744	841.266
37.5843	847.441
37.5941	850.127
37.604	850.293
37.6138	849.51
37.6237	849.498
37.6335	851.646
37.6434	856.603
37.6532	864.077
37.6631	872.88
37.6729	881.206
37.6828	887.081
37.6926	888.85
37.7025	885.57
37.7123	877.202
37.7222	864.559
37.732	849.028
37.7418	832.142
37.7517	815.161
37.7615	798.75
37.7714	782.884
37.7812	766.983
37.7911	750.233
37.8009	732.013
37.8108	712.271
37.8206	691.75
37.8305	671.972
37.8403	654.997
37.8502	642.991
37.86	637.728
37.8699	640.149
37.8797	650.087
37.8896	666.227
37.8994	686.298
37.9093	707.465
37.9191	726.805
37.929	741.781
37.9388	750.624
37.9487	752.543
37.9585	747.768
37.9684	737.415
37.9782	723.248
37.9881	707.358
37.9979	691.847
38.0077	678.533
38.0176	668.72
38.0274	663.058
38.0373	661.495
38.0471	663.325
38.057	667.334
38.0668	672.021
38.0767	675.854
38.0865	677.54
38.0964	676.232
38.1062	671.656
38.1161	664.106
38.1259	654.324
38.1358	643.285
38.1456	631.947
38.1555	621.024
38.1653	610.858
38.1752	601.409
38.185	592.382
38.1949	583.434
38.2047	574.416
38.2145	565.56
38.2244	557.55
38.2342	551.448
38.2441	548.48
38.2539	549.735
38.2638	555.847
38.2736	566.758
38.2835	581.611
38.2933	598.82
38.3032	616.31
38.313	631.861
38.3229	643.498
38.3327	649.846
38.3426	650.361
38.3524	645.415
38.3623	636.216
38.3721	624.59
38.382	612.667
38.3918	602.535
38.4016	595.916
38.4115	593.907
38.4213	596.825
38.4312	604.166
38.441	614.687
38.4509	626.587
38.4607	637.773
38.4706	646.179
38.4804	650.085
38.4903	648.4
38.5001	640.861
38.51	628.103
38.5198	611.595
38.5297	593.428
38.5395	576.002
38.5494	561.649
38.5592	552.262
38.5691	549.001
38.5789	552.118
38.5888	560.937
38.5986	573.985
38.6084	589.244
38.6183	604.481
38.6281	617.588
38.638	626.879
38.6478	631.306
38.6577	630.563
38.6675	625.075
38.6774	615.893
38.6872	604.508
38.6971	592.624
38.7069	581.918
38.7168	573.826
38.7266	569.362
38.7365	569.012
38.7463	572.703
38.7562	579.854
38.766	589.493
38.7759	600.436
38.7857	611.474
38.7956	621.561
38.8054	629.941
38.8152	636.218
38.8251	640.338
38.8349	642.52
38.8448	643.133
38.8546	642.585
38.8645	641.231
38.8743	639.337
38.8842	637.094
38.894	634.676
38.9039	632.298
38.9137	630.259
38.9236	628.933
38.9334	628.709
38.9433	629.889
38.9531	632.584
38.963	636.635
38.9728	641.608
38.9827	646.863
38.9925	651.696
39.0024	655.518
39.0122	658.018
39.0221	659.256
39.0319	659.656
39.0418	659.884
39.0516	660.639
39.0615	662.412
39.0713	665.28
39.0811	668.8
39.091	672.048
39.1008	673.801
39.1107	672.829
39.1205	668.221
39.1304	659.673
39.1402	647.641
39.1501	633.318
39.1599	618.439
39.1698	604.933
39.1796	594.526
39.1895	588.38
39.1993	586.858
39.2092	589.488
39.219	595.109
39.2289	602.198
39.2387	609.26
39.2486	615.199
39.2584	619.563
39.2683	622.608
39.2781	625.161
39.2879	628.315
39.2978	633.055
39.3076	639.9
39.3175	648.675
39.3273	658.47
39.3372	667.803
39.347	674.947
39.3569	678.337
39.3667	676.961
39.3766	670.626
39.3864	660.043
39.3963	646.717
39.4061	632.672
39.416	620.09
39.4258	610.947
39.4357	606.73
39.4455	608.289
39.4554	615.822
39.4652	628.97
39.4751	646.971
39.4849	668.802
39.4948	693.295
39.5046	719.187
39.5144	745.152
39.5243	769.825
39.5341	791.88
39.544	810.156
39.5538	823.827
39.5637	832.566
39.5735	836.645
39.5834	836.91
39.5932	834.606
39.6031	831.083
39.6129	827.439
39.6228	824.225
39.6326	821.277
39.6425	817.786
39.6523	812.574
39.6622	804.541
39.672	793.135
39.6818	778.712
[truncated: 2,061 more rows]
