# Supplementary material for: Cork-derived magnetic composites: a preliminary study
Source: Royal Society of Chemistry journal article supplement (doi:10.1039/d4su00442f), 2024-12-11
Supplement: d4su00442f3.xlsx [file d4su00442f3.xlsx]

## Sheet: air
6 nm			9 nm			15 nm				6 nm			9 nm			15 nm
C2 air			C3 air			C4 air				FC2 air			FC3 air			FC4 air
0.99888	3.51636		1.00238	3.47934		0.99396	6.2107			1.0002	5.00661		1.0059	7.96679		0.99336	8.91974
0.99911	3.51728		1.00337	3.47644		0.99396	6.21335			1.00056	5.00593		1.00624	7.96833		0.99336	8.92079
0.99911	3.51857		1.00358	3.47218		0.99396	6.21268			1.00056	5.00587		1.00656	7.96724		0.99336	8.92112
0.99911	3.51925		1.00379	3.46719		0.99474	6.20623			1.00056	5.00486		1.00656	7.96673		0.95963	8.90883
0.99911	3.51888		1.00238	3.46281		0.99492	6.19316			1.00056	5.00471		1.00656	7.96603		0.95963	8.91089
0.96264	3.49868		0.96626	3.47628		0.96532	6.1748			0.96363	4.98012		0.96883	7.95809		0.95963	8.9162
0.96264	3.49828		0.96604	3.47322		0.96471	6.17469			0.96363	4.9804		0.96854	7.95788		0.95963	8.9189
0.96264	3.49758		0.96581	3.47025		0.96471	6.17927			0.96363	4.97916		0.96843	7.95714		0.95947	8.9196
0.96264	3.49742		0.96734	3.4696		0.96471	6.18441			0.96332	4.9775		0.96843	7.956		0.93093	8.90318
0.96237	3.4962		0.96734	3.47037		0.96471	6.18673			0.96326	4.97779		0.96843	7.95508		0.93093	8.90578
0.93425	3.47143		0.93743	3.46944		0.94185	6.19751			0.93546	4.95002		0.93955	7.94055		0.93093	8.90834
0.93425	3.47273		0.93714	3.47022		0.94152	6.20397			0.93546	4.94984		0.93955	7.93992		0.93073	8.91197
0.93392	3.47378		0.93692	3.47103		0.9412	6.21478			0.9351	4.94931		0.93955	7.93865		0.93068	8.91471
0.93385	3.4763		0.93692	3.47083		0.94335	6.22251			0.93503	4.94872		0.93955	7.93917		0.90222	8.9156
0.93378	3.47703		0.93692	3.47		0.94335	6.22293			0.93496	4.94805		0.93967	7.9418		0.90222	8.91853
0.90569	3.44568		0.90814	3.44745		0.91789	6.21994			0.90613	4.9243		0.91096	7.92668		0.90222	8.91871
0.90498	3.44295		0.90785	3.44728		0.9174	6.21796			0.90601	4.92337		0.91096	7.92632		0.90175	8.91707
0.90484	3.44107		0.90785	3.44495		0.91729	6.22274			0.90588	4.92296		0.91096	7.92515		0.90165	8.91637
0.9047	3.44099		0.90785	3.4417		0.91718	6.22617			0.90671	4.92317		0.91044	7.92459		0.87384	8.92442
0.90569	3.44101		0.90785	3.44199		0.91707	6.22475			0.90671	4.92222		0.91034	7.92458		0.87332	8.91946
0.87646	3.42755		0.87888	3.45486		0.89393	6.24651			0.87675	4.88936		0.88172	7.91423		0.87319	8.91684
0.87631	3.42922		0.87888	3.45438		0.89393	6.24352			0.87648	4.88817		0.88136	7.91417		0.87307	8.91787
0.87615	3.42977		0.87888	3.45804		0.89332	6.22969			0.87648	4.88791		0.88127	7.91371		0.87294	8.92099
0.87717	3.43045		0.87888	3.46203		0.89318	6.21425			0.87648	4.88879		0.88118	7.9135		0.84378	8.92829
0.87717	3.43134		0.87881	3.46306		0.89305	6.20818			0.87648	4.89042		0.88109	7.91174		0.8436	8.92902
0.84679	3.41818		0.84966	3.47972		0.86946	6.22883			0.84754	4.86443		0.85209	7.90309		0.84341	8.9278
0.84654	3.41922		0.84966	3.47845		0.86946	6.22324			0.84746	4.86293		0.8519	7.90291		0.84334	8.92703
0.84652	3.41973		0.84966	3.47568		0.86946	6.21369			0.84746	4.86123		0.85171	7.90209		0.84334	8.92494
0.84652	3.42039		0.84941	3.47455		0.86946	6.20603			0.84746	4.85957		0.85151	7.90017		0.81489	8.90152
0.84652	3.421		0.84935	3.47515		0.86912	6.20201			0.84746	4.85925		0.85293	7.89961		0.8145	8.9015
0.81726	3.38016		0.82068	3.44567		0.84535	6.27866			0.81835	4.82714		0.82247	7.88676		0.81439	8.9004
0.81716	3.37783		0.82068	3.44023		0.84476	6.27522			0.81835	4.82725		0.82226	7.888		0.81439	8.89976
0.81716	3.37516		0.81995	3.43853		0.84443	6.27251			0.81835	4.82575		0.82204	7.88868		0.81439	8.90058
0.81716	3.37353		0.81979	3.44025		0.84443	6.27268			0.81835	4.82404		0.82199	7.88755		0.7848	8.89654
0.81716	3.37363		0.81963	3.44328		0.84443	6.28011			0.81791	4.82303		0.82199	7.88623		0.7848	8.8941
0.78807	3.35045		0.79152	3.41676		0.82105	6.30279			0.78865	4.78043		0.79254	7.87594		0.7848	8.89119
0.78807	3.35207		0.79076	3.42116		0.82068	6.29556			0.78865	4.77835		0.79218	7.87514		0.78466	8.89089
0.78766	3.35424		0.7906	3.43075		0.82032	6.28852			0.78865	4.77835		0.79208	7.87418		0.78462	8.88812
0.78756	3.35642		0.79044	3.43886		0.81995	6.28246			0.78826	4.77868		0.79208	7.87305		0.75568	8.86614
0.78746	3.35753		0.79152	3.43966		0.82253	6.27953			0.78818	4.77826		0.79208	7.87221		0.75568	8.8649
0.75832	3.32752		0.76092	3.41554		0.79677	6.31176			0.75952	4.74003		0.7627	7.85836		0.75568	8.86585
0.75821	3.32797		0.76063	3.4163		0.79677	6.32777			0.75879	4.73906		0.76236	7.85698		0.75506	8.86873
0.7581	3.32816		0.76034	3.41088		0.79677	6.34494			0.75862	4.73749		0.76236	7.85659		0.75494	8.8701
0.758	3.32794		0.76231	3.40089		0.79606	6.35972			0.75845	4.73724		0.76236	7.85676		0.72617	8.85705
0.75875	3.32728		0.76231	3.39186		0.79592	6.36927			0.75829	4.73715		0.76236	7.85683		0.72559	8.85768
0.72834	3.29749		0.73114	3.3798		0.77135	6.3381			0.72925	4.69314		0.73244	7.84324		0.72547	8.85946
0.72804	3.29785		0.73087	3.38223		0.77121	6.34654			0.72908	4.69148		0.73244	7.84233		0.72535	8.85967
0.72803	3.29881		0.73062	3.38861		0.77121	6.35659			0.72892	4.69039		0.73244	7.84182		0.72617	8.85824
0.72803	3.29995		0.73062	3.39609		0.77121	6.36433			0.72887	4.68955		0.73244	7.84205		0.69645	8.84318
0.72803	3.3008		0.73062	3.40062		0.77121	6.36953			0.72887	4.68896		0.73197	7.84065		0.69615	8.84543
0.69861	3.2615		0.70113	3.41626		0.74727	6.37687			0.69905	4.64659		0.70271	7.82667		0.69585	8.84909
0.69861	3.26091		0.7008	3.41509		0.7468	6.37846			0.69905	4.6442		0.70271	7.82444		0.69791	8.85147
0.69861	3.26122		0.7008	3.4128		0.74632	6.38022			0.69905	4.6426		0.70271	7.82358		0.69791	8.84876
0.69846	3.26158		0.7008	3.40977		0.74627	6.38168			0.69905	4.64192		0.70236	7.82348		0.66669	8.84504
0.69843	3.26139		0.7008	3.40749		0.74627	6.38084			0.69905	4.64054		0.70228	7.8232		0.66628	8.83639
0.66922	3.22339		0.67078	3.40223		0.72352	6.35399			0.66982	4.5905		0.67288	7.80752		0.66602	8.83202
0.66922	3.22372		0.67078	3.40054		0.7225	6.36277			0.66982	4.5891		0.67241	7.80673		0.66602	8.83223
0.6687	3.22351		0.67078	3.39648		0.72227	6.36514			0.66982	4.58897		0.6723	7.80583		0.66602	8.83557
0.66858	3.22364		0.67078	3.39254		0.72204	6.36131			0.66982	4.58833		0.67219	7.80483		0.63657	8.84101
0.66846	3.22295		0.67063	3.3944		0.72181	6.35757			0.66914	4.58759		0.67208	7.80453		0.63629	8.83916
0.6399	3.18852		0.6412	3.34969		0.69834	6.38732			0.63994	4.52916		0.64201	7.78853		0.63629	8.83705
0.63906	3.18908		0.6412	3.358		0.69834	6.38925			0.63994	4.52886		0.64177	7.78674		0.63629	8.83304
0.63887	3.19002		0.6412	3.3728		0.69744	6.39031			0.63926	4.52894		0.64153	7.78527		0.63629	8.8301
0.63867	3.19026		0.6412	3.38619		0.69724	6.39053			0.63911	4.52896		0.64153	7.78497		0.60644	8.80703
0.63848	3.18858		0.64073	3.39394		0.69704	6.38835			0.63897	4.52917		0.64153	7.78361		0.60644	8.80551
0.60923	3.1415		0.61113	3.37544		0.67303	6.36626			0.61041	4.47221		0.61183	7.76342		0.60644	8.8048
0.60898	3.14087		0.61113	3.36429		0.67303	6.36151			0.60966	4.47057		0.61183	7.76289		0.60644	8.80832
0.60873	3.14014		0.61113	3.36049		0.67303	6.35751			0.6095	4.46967		0.61183	7.76317		0.60615	8.81269
0.6104	3.13898		0.61046	3.36106		0.67303	6.35469			0.60935	4.46892		0.61183	7.76373		0.57682	8.78726
0.6104	3.13767		0.61032	3.36206		0.6725	6.35743			0.61041	4.46726		0.61183	7.76315		0.57682	8.78412
0.57922	3.10023		0.58142	3.37725		0.64802	6.41184			0.58001	4.4021		0.58137	7.74224		0.57682	8.7823
0.57892	3.09973		0.58067	3.37351		0.64766	6.41087			0.57976	4.40128		0.58137	7.74302		0.57682	8.78126
0.57869	3.09839		0.58051	3.37387		0.64766	6.40754			0.57952	4.40061		0.58137	7.74211		0.57632	8.78419
0.57869	3.0973		0.58035	3.37819		0.64766	6.40291			0.58113	4.40023		0.58137	7.7417		0.54735	8.76449
0.57869	3.0966		0.58142	3.38313		0.64766	6.39964			0.58113	4.39935		0.58127	7.7412		0.54735	8.76058
0.54886	3.04884		0.55071	3.38294		0.62318	6.36659			0.54963	4.32909		0.55146	7.71938		0.54735	8.75565
0.54886	3.04722		0.55043	3.37644		0.62269	6.36628			0.54936	4.32707		0.55146	7.71909		0.54679	8.74967
0.54886	3.04561		0.55014	3.36881		0.62247	6.36469			0.54931	4.32577		0.55108	7.71795		0.54667	8.74634
0.54886	3.04399		0.552	3.36166		0.62247	6.37036			0.54931	4.32463		0.551	7.71658		0.51778	8.73225
0.54849	3.04236		0.552	3.35562		0.62247	6.37788			0.54931	4.32198		0.55092	7.71624		0.51725	8.73113
0.51907	2.99095		0.52079	3.33016		0.60021	6.43503			0.51936	4.24589		0.52221	7.69712		0.51713	8.72935
0.51907	2.9892		0.52045	3.3211		0.59867	6.43855			0.51919	4.24327		0.52135	7.69521		0.51701	8.72815
0.51907	2.98928		0.52018	3.31631		0.59836	6.44176			0.51919	4.24123		0.52116	7.69342		0.51689	8.73262
0.51858	2.98859		0.52018	3.31359		0.59804	6.44291			0.51919	4.24011		0.52098	7.69285		0.48743	8.72241
0.51848	2.98715		0.52018	3.30874		0.60021	6.43447			0.51919	4.23978		0.52221	7.69239		0.48721	8.72023
0.48952	2.9284		0.49067	3.34076		0.57436	6.40547			0.48937	4.1524		0.4912	7.66653		0.48699	8.71492
0.48952	2.92675		0.49028	3.33648		0.57344	6.40883			0.48937	4.15042		0.49096	7.66462		0.48677	8.70848
0.489	2.92506		0.49028	3.33456		0.57322	6.41067			0.48937	4.14955		0.49072	7.66332		0.48831	8.70461
0.48888	2.92432		0.49028	3.33467		0.57301	6.41478			0.48937	4.14928		0.49233	7.66226		0.45772	8.68869
0.48876	2.92457		0.49028	3.3344		0.5728	6.41779			0.48907	4.14849		0.49233	7.66188		0.45741	8.6912
0.45902	2.85914		0.46007	3.32308		0.5487	6.40254			0.45987	4.05599		0.461	7.63689		0.4571	8.69443
0.4588	2.8578		0.46007	3.32215		0.5487	6.40123			0.45987	4.05277		0.4607	7.63639		0.45927	8.69506
0.45858	2.85712		0.46007	3.32031		0.5487	6.40008			0.45987	4.05079		0.46041	7.63538		0.45927	8.69253
0.45836	2.85752		0.45991	3.31908		0.54806	6.40011			0.45935	4.04907		0.46041	7.63382		0.42817	8.66066
0.46003	2.85808		0.45987	3.31881		0.54791	6.40053			0.45923	4.04864		0.46041	7.63226		0.42782	8.6564
0.42948	2.77967		0.43045	3.31263		0.52324	6.38813			0.43018	3.94522		0.43068	7.59839		0.42754	8.65368
0.42921	2.77831		0.43045	3.30401		0.52324	6.39296			0.43018	3.94371		0.43029	7.59741		0.42754	8.65005
0.42895	2.778		0.43012	3.29817		0.52324	6.38978			0.42935	3.94342		0.43029	7.59574		0.42754	8.64682
0.42889	2.77817		0.43004	3.29548		0.52324	6.38285			0.42917	3.94129		0.43029	7.59397		0.39769	8.61948
0.42889	2.7802		0.42996	3.29061		0.5229	6.38589			0.429	3.93958		0.43029	7.59315		0.39769	8.61925
0.39925	2.69692		0.40017	3.32926		0.49864	6.40964			0.39975	3.8288		0.40044	7.55833		0.39769	8.61728
0.39883	2.69487		0.39995	3.32565		0.49828	6.40779			0.39953	3.82566		0.40044	7.558		0.39769	8.61113
0.39867	2.6939		0.39974	3.31739		0.49828	6.40134			0.39932	3.82308		0.40044	7.55717		0.39725	8.60583
0.39867	2.69362		0.39952	3.30954		0.49828	6.3933			0.3991	3.8206		0.40044	7.556		0.36809	8.55307
0.39867	2.69349		0.40106	3.3034		0.49828	6.38983			0.40063	3.81936		0.40007	7.55497		0.36809	8.5533
0.36944	2.6116		0.37021	3.26073		0.4738	6.39953			0.36974	3.69489		0.3701	7.50824		0.36809	8.55459
0.36917	2.60973		0.36993	3.2626		0.47333	6.39388			0.36946	3.69213		0.3701	7.50744		0.36768	8.5537
0.36917	2.60735		0.36964	3.26361		0.473	6.38807			0.36919	3.68964		0.3701	7.50727		0.36759	8.55496
0.36917	2.60557		0.37166	3.26377		0.473	6.38497			0.37111	3.68728		0.36976	7.50615		0.3386	8.49182
0.36917	2.60353		0.37166	3.26267		0.473	6.38441			0.37111	3.68513		0.36968	7.50647		0.3386	8.49101
0.33951	2.50444		0.33983	3.2362		0.44909	6.33617			0.33959	3.54375		0.34051	7.4573		0.33801	8.49084
0.33951	2.50377		0.33955	3.235		0.44877	6.34433			0.33933	3.54134		0.34051	7.45656		0.33788	8.48958
0.33951	2.50222		0.33955	3.23904		0.44846	6.35162			0.33933	3.53843		0.33991	7.45576		0.33775	8.48829
0.33951	2.50077		0.33955	3.24443		0.44814	6.35791			0.33933	3.53652		0.33977	7.45474		0.30953	8.42599
0.33889	2.49933		0.33955	3.24973		0.4505	6.36556			0.33933	3.53529		0.33963	7.45447		0.30856	8.42119
0.30951	2.39377		0.31008	3.18418		0.42474	6.35723			0.30959	3.3758		0.3106	7.40144		0.30835	8.41466
0.30951	2.39164		0.31008	3.18901		0.42474	6.35763			0.30959	3.37291		0.3106	7.40056		0.30814	8.41173
0.30951	2.39018		0.31008	3.19423		0.42385	6.35399			0.30959	3.37114		0.3106	7.39903		0.30953	8.41244
0.30912	2.38912		0.3096	3.19822		0.42365	6.34651			0.3094	3.3698		0.30989	7.39665		0.27864	8.35096
0.30902	2.38826		0.30949	3.19888		0.42344	6.3414			0.30935	3.36814		0.30974	7.39609		0.27835	8.35187
0.27982	2.26023		0.2801	3.17402		0.39914	6.34201			0.28	3.19335		0.28016	7.3277		0.27806	8.3519
0.27919	2.25707		0.2801	3.17442		0.39914	6.3336			0.28	3.18852		0.28016	7.32597		0.28013	8.3518
0.27904	2.25498		0.27963	3.17697		0.39914	6.32992			0.28	3.18553		0.27934	7.32405		0.28013	8.35082
0.27888	2.25399		0.27951	3.17955		0.39914	6.32899			0.27924	3.18342		0.27917	7.32233		0.24858	8.24895
0.27873	2.25356		0.2794	3.17816		0.39829	6.33374			0.27908	3.18196		0.279	7.31982		0.24816	8.2459
0.2502	2.11187		0.25054	3.1699		0.37348	6.34008			0.24943	2.97873		0.24954	7.23424		0.24798	8.24637
0.24923	2.10955		0.24966	3.16965		0.37348	6.34324			0.24924	2.97518		0.24929	7.23073		0.24798	8.24913
0.24903	2.10717		0.24945	3.16908		0.37348	6.34419			0.24904	2.97283		0.24904	7.22853		0.24798	8.25061
0.24884	2.10526		0.24924	3.16912		0.37348	6.34036			0.24885	2.97093		0.24879	7.22824		0.21808	8.10099
0.2502	2.10387		0.24903	3.17014		0.37326	6.3386			0.25022	2.96994		0.25055	7.2278		0.21808	8.0975
0.2194	1.94717		0.21926	3.07924		0.34902	6.33908			0.21981	2.74495		0.21889	7.12238		0.21808	8.09525
0.2191	1.94381		0.21903	3.07983		0.34837	6.34559			0.21951	2.74026		0.21863	7.12041		0.21808	8.09538
0.21897	1.94125		0.2188	3.08267		0.34831	6.35237			0.21921	2.73664		0.21846	7.11912		0.21802	8.09499
0.21897	1.93955		0.21874	3.08747		0.34831	6.35307			0.22133	2.73361		0.21846	7.11756		0.18851	7.93618
0.21897	1.93774		0.21874	3.09353		0.34831	6.34595			0.22133	2.73191		0.21846	7.11714		0.18851	7.93286
0.18911	1.76145		0.18944	3.02844		0.32454	6.29433			0.18934	2.48072		0.18866	6.98379		0.1882	7.93075
0.18887	1.75808		0.189	3.03457		0.32411	6.29615			0.18889	2.47462		0.18832	6.97992		0.18813	7.92944
0.18887	1.75534		0.18885	3.03696		0.32368	6.2948			0.18873	2.46986		0.18832	6.97724		0.18806	7.92862
0.18887	1.75302		0.18885	3.03508		0.32326	6.2893			0.18873	2.46683		0.18832	6.97618		0.15853	7.71466
0.18887	1.75132		0.18885	3.03349		0.32636	6.28575			0.18873	2.46524		0.18832	6.97514		0.15834	7.71194
0.16026	1.56827		0.15899	2.9546		0.29987	6.26573			0.15897	2.17849		0.15849	6.79565		0.15815	7.70972
0.15949	1.56172		0.15876	2.95187		0.29901	6.2633			0.15897	2.17409		0.15849	6.79194		0.15796	7.70745
0.15912	1.55764		0.15876	2.94919		0.29881	6.26034			0.15897	2.17025		0.15849	6.78911		0.15936	7.70511
0.15912	1.5534		0.15876	2.9466		0.2986	6.26003			0.15897	2.16721		0.1581	6.78739		0.12851	7.43604
0.15912	1.55002		0.15876	2.94572		0.29839	6.25581			0.15886	2.16568		0.158	6.78576		0.12815	7.43346
0.12917	1.31776		0.12911	2.84337		0.2743	6.21165			0.12936	1.85333		0.12881	6.53067		0.12815	7.42962
0.12878	1.31356		0.12911	2.84053		0.2743	6.21017			0.12936	1.84739		0.12881	6.52445		0.12815	7.42387
0.12878	1.31034		0.12911	2.83844		0.2736	6.20961			0.12936	1.84259		0.1283	6.52065		0.12815	7.42037
0.12878	1.30797		0.12863	2.83655		0.27343	6.205			0.12898	1.8391		0.12818	6.51694		0.09831	7.06049
0.12878	1.30567		0.12852	2.83425		0.27325	6.20154			0.1289	1.83624		0.12806	6.51395		0.09831	7.05068
0.09883	1.05415		0.09908	2.68688		0.24898	6.1586			0.09948	1.47641		0.09881	6.12806		0.09831	7.04508
0.09883	1.0508		0.09854	2.6864		0.24898	6.15508			0.09873	1.47065		0.0979	6.1197		0.09831	7.04213
0.09883	1.04764		0.09842	2.68145		0.24898	6.14832			0.09855	1.46653		0.09769	6.11336		0.09799	7.04183
0.09859	1.04486		0.0983	2.67172		0.24898	6.13986			0.09838	1.46342		0.09748	6.10838		0.08849	6.86998
0.09853	1.04309		0.09818	2.66151		0.24853	6.13341			0.0982	1.46154		0.09726	6.1057		0.08837	6.86658
0.08864	0.95298		0.08842	2.59735		0.22398	6.09352			0.08839	1.33262		0.08755	5.92052		0.08825	6.86602
0.08853	0.9511		0.08842	2.59552		0.22388	6.09637			0.08839	1.3294		0.08755	5.91712		0.08825	6.86693
0.08853	0.95009		0.08842	2.5923		0.22388	6.09969			0.08832	1.32765		0.08734	5.91459		0.08825	6.8671
0.08853	0.94929		0.0881	2.58848		0.22388	6.10059			0.0883	1.3262		0.08729	5.91245		0.07865	6.6755
0.08853	0.94838		0.08803	2.58392		0.22388	6.10047			0.08828	1.32515		0.08724	5.9115		0.07817	6.66784
0.07845	0.85301		0.07815	2.51998		0.19913	6.01637			0.07816	1.19638		0.07711	5.69545		0.07806	6.66124
0.07832	0.85133		0.07806	2.51165		0.19857	6.01223			0.07813	1.19283		0.07711	5.68997		0.07795	6.65661
0.07818	0.85083		0.07806	2.50561		0.19844	6.00964			0.07813	1.19065		0.07711	5.68608		0.07783	6.65368
0.07911	0.8498		0.07806	2.50327		0.19844	6.00799			0.07813	1.18831		0.07703	5.68306		0.06825	6.42813
0.07911	0.8489		0.07806	2.49996		0.19844	6.00802			0.07813	1.18701		0.07701	5.68133		0.06825	6.42202
0.06883	0.75645		0.06818	2.39804		0.17454	5.88601			0.06848	1.05794		0.06744	5.43136		0.06825	6.41932
0.06883	0.75421		0.06805	2.39377		0.17416	5.88777			0.06832	1.05422		0.06732	5.42556		0.06817	6.41658
0.06825	0.75282		0.06793	2.39073		0.17379	5.88765			0.06815	1.0516		0.06732	5.42018		0.06815	6.41436
0.06813	0.75165		0.06789	2.3876		0.17342	5.88466			0.06815	1.04978		0.06732	5.41524		0.05835	6.14871
0.06801	0.75074		0.06789	2.38437		0.17599	5.88933			0.06815	1.0494		0.06732	5.41218		0.05814	6.14148
0.05861	0.65782		0.05825	2.25389		0.14966	5.7631			0.05875	0.91718		0.05738	5.09908		0.05812	6.1377
0.05861	0.65557		0.05788	2.24813		0.14895	5.75983			0.05848	0.91365		0.0573	5.09155		0.05812	6.13504
0.05861	0.65395		0.05779	2.24205		0.14878	5.75503			0.05842	0.9108		0.05721	5.08618		0.05812	6.13148
0.05861	0.65276		0.0577	2.23827		0.14861	5.75047			0.05836	0.90835		0.05781	5.08083		0.04836	5.8051
0.0583	0.65185		0.05761	2.23747		0.14844	5.74816			0.05875	0.90631		0.05781	5.07717		0.04822	5.7938
0.04844	0.55439		0.04814	2.06813		0.12459	5.58277			0.0485	0.76906		0.0472	4.67377		0.04807	5.78375
0.04825	0.55162		0.04814	2.06035		0.12459	5.57693			0.0485	0.76557		0.04702	4.66594		0.04793	5.77581
0.04819	0.54957		0.04814	2.05655		0.12366	5.57246			0.0485	0.7627		0.04699	4.65903		0.049	5.76983
0.04819	0.54852		0.04788	2.05674		0.12344	5.56796			0.04824	0.76028		0.04695	4.65402		0.03834	5.35822
0.04819	0.54787		0.04781	2.05722		0.12321	5.56168			0.04818	0.75853		0.0472	4.65017		0.03834	5.3448
0.03828	0.44704		0.03778	1.82904		0.09871	5.34458			0.03799	0.61671		0.03689	4.13585		0.03805	5.33424
0.03819	0.44375		0.03764	1.82442		0.09871	5.33679			0.03781	0.61313		0.03689	4.12114		0.03799	5.326
0.0381	0.44138		0.03764	1.82218		0.09871	5.33078			0.03781	0.6099		0.03689	4.10935		0.03792	5.31763
0.038	0.43975		0.03764	1.81955		0.09837	5.32698			0.03781	0.6068		0.03667	4.09958		0.02813	4.81063
0.03869	0.43799		0.03764	1.81695		0.09829	5.32553			0.03781	0.60508		0.03662	4.09159		0.02812	4.79304
0.02857	0.33887		0.02778	1.53971		0.07332	5.00958			0.0284	0.46584		0.02695	3.43759		0.02812	4.77895
0.02857	0.33692		0.02762	1.53012		0.07325	4.99335			0.02823	0.46267		0.02695	3.42109		0.02812	4.76667
0.02828	0.33529		0.02751	1.52205		0.07325	4.98039			0.02816	0.46006		0.02695	3.4077		0.02812	4.75628
0.02823	0.33358		0.02751	1.51458		0.07325	4.97268			0.02816	0.45764		0.02695	3.3973		0.0186	4.01965
0.02817	0.33257		0.02751	1.50882		0.07325	4.97668			0.02816	0.4566		0.02677	3.38885		0.01839	3.99155
0.0184	0.23584		0.01783	1.13402		0.04939	4.51852			0.01899	0.31666		0.01718	2.52956		0.0182	3.96815
0.0184	0.23294		0.01771	1.12243		0.04872	4.49637			0.01831	0.31308		0.01699	2.50206		0.0182	3.9478
0.0184	0.23086		0.01759	1.11331		0.04815	4.47709			0.01818	0.30969		0.0169	2.48009		0.0182	3.93274
0.01797	0.22922		0.01841	1.10641		0.04815	4.4624			0.01805	0.30686		0.0169	2.46267		0.00881	2.75709
0.01787	0.22763		0.01841	1.10095		0.04815	4.45385			0.01899	0.30518		0.0169	2.44883		0.0087	2.70761
0.00829	0.127		0.00796	0.61644		0.0243	3.56025			0.00837	0.16022		0.00697	1.32785		0.00859	2.6682
0.00829	0.12457		0.00778	0.6016		0.02388	3.51866			0.00829	0.1564		0.0068	1.2897		0.00847	2.6344
0.00829	0.12282		0.0076	0.58945		0.02347	3.48394			0.00821	0.15314		0.00663	1.2586		0.0093	2.60839
0.00812	0.1212		0.00742	0.5801		0.02625	3.45615			0.00813	0.15074		0.00782	1.23359		-0.000252428	0.32632
0.00808	0.11948		0.00878	0.57312		0.02625	3.43751			0.00867	0.14919		0.00782	1.21404		-0.000759971	0.22225
-0.0011	0.02467		-0.00118	0.00857		-0.00376	-0.83785			-0.00055873	0.01464		-0.00187	-0.13095		-0.000880988	0.13299
-0.0011	0.02251		-0.00177	-0.00887		-0.00379	-0.83686			-0.00125	0.0102		-0.00244	-0.17185		-0.001	0.05802
-0.0011	0.02028		-0.0019	-0.02422		-0.00382	-0.83492			-0.00141	0.00717		-0.00256	-0.20216		-0.00112	-0.00534
-0.0011	0.01833		-0.00203	-0.03594		-0.00382	-0.83096			-0.00158	0.00426		-0.00268	-0.22875		-0.01133	-2.58731
-0.0014	0.01719		-0.00217	-0.04521		-0.00382	-0.82785			-0.00174	0.00202		-0.00187	-0.24848		-0.01146	-2.63361
-0.01138	-0.09176		-0.01122	-0.6187		-0.0249	-3.27455			-0.01164	-0.15355		-0.01256	-1.61779		-0.01159	-2.66977
-0.01191	-0.09378		-0.01139	-0.63613		-0.02545	-3.33525			-0.01176	-0.15773		-0.01269	-1.64674		-0.01069	-2.70082
-0.01204	-0.09566		-0.01156	-0.64944		-0.02601	-3.38092			-0.01189	-0.16119		-0.01269	-1.67064		-0.01069	-2.72546
-0.01216	-0.09789		-0.01161	-0.65972		-0.02603	-3.41601			-0.01191	-0.16375		-0.01269	-1.68936		-0.02111	-3.90117
-0.01228	-0.09887		-0.01161	-0.6686		-0.02603	-3.44131			-0.01191	-0.16544		-0.01269	-1.70383		-0.02127	-3.9259
-0.02146	-0.19805		-0.02134	-1.15105		-0.0506	-4.41154			-0.02154	-0.30885		-0.02265	-2.76718		-0.02143	-3.94588
-0.02146	-0.20059		-0.02149	-1.1637		-0.05129	-4.43799			-0.02166	-0.31247		-0.02278	-2.7885		-0.02148	-3.96353
-0.02194	-0.20272		-0.02164	-1.17531		-0.05184	-4.45637			-0.02179	-0.31531		-0.02278	-2.80595		-0.02148	-3.97642
-0.02203	-0.20437		-0.02168	-1.1843		-0.05184	-4.47022			-0.02179	-0.31772		-0.02278	-2.82006		-0.03121	-4.72405
-0.02213	-0.2062		-0.02168	-1.18872		-0.05184	-4.47785			-0.02179	-0.31958		-0.02278	-2.83198		-0.03135	-4.7403
-0.0316	-0.30742		-0.03139	-1.56581		-0.07494	-4.97601			-0.03192	-0.46459		-0.03265	-3.63853		-0.03148	-4.75274
-0.0316	-0.31028		-0.03158	-1.57581		-0.0765	-4.98983			-0.03209	-0.46824		-0.03276	-3.65573		-0.03154	-4.76356
-0.0319	-0.3127		-0.03176	-1.58257		-0.07686	-5.00061			-0.03225	-0.47144		-0.03276	-3.66912		-0.03154	-4.77225
-0.03196	-0.31415		-0.03046	-1.58797		-0.07721	-5.01517			-0.03225	-0.47358		-0.03276	-3.68012		-0.03905	-5.4289
-0.03202	-0.3157		-0.03046	-1.5929		-0.07757	-5.02858			-0.03225	-0.47497		-0.03276	-3.68927		-0.03969	-5.33232
-0.04165	-0.41309		-0.04144	-1.84978		-0.10135	-5.34436			-0.04154	-0.61707		-0.04259	-4.27894		-0.04034	-5.29031
-0.04165	-0.41567		-0.04155	-1.85319		-0.10135	-5.35249			-0.04168	-0.61993		-0.04278	-4.29309		-0.04099	-5.28309
-0.04165	-0.41774		-0.04166	-1.85675		-0.10217	-5.35849			-0.04181	-0.62253		-0.04296	-4.30564		-0.03643	-5.29089
-0.042	-0.41945		-0.04177	-1.86261		-0.10236	-5.36263			-0.04195	-0.62515		-0.04168	-4.31438		-0.05158	-5.75557
-0.04207	-0.41993		-0.04099	-1.87168		-0.10255	-5.36598			-0.04092	-0.6269		-0.04168	-4.32218		-0.05179	-5.76428
-0.05212	-0.52126		-0.05182	-2.08646		-0.1264	-5.5902			-0.05167	-0.77303		-0.05265	-4.80783		-0.05184	-5.77122
-0.05212	-0.52374		-0.05205	-2.09612		-0.1264	-5.59478			-0.05227	-0.77653		-0.05265	-4.81956		-0.05189	-5.77579
-0.05212	-0.52571		-0.0521	-2.10487		-0.1264	-5.59774			-0.05242	-0.77896		-0.05334	-4.82814		-0.05194	-5.7799
-0.05212	-0.52738		-0.05215	-2.11057		-0.12723	-5.60028			-0.05257	-0.7807		-0.05349	-4.83485		-0.06165	-6.10611
-0.0523	-0.52849		-0.05221	-2.11163		-0.12742	-5.60656			-0.05272	-0.78293		-0.05363	-4.84058		-0.06165	-6.1123
-0.06251	-0.62936		-0.06214	-2.25268		-0.15177	-5.77707			-0.06227	-0.92338		-0.06338	-5.21767		-0.06203	-6.11647
-0.06256	-0.63105		-0.06214	-2.26035		-0.15183	-5.78486			-0.06227	-0.92614		-0.06338	-5.22508		-0.06212	-6.11939
-0.06256	-0.6327		-0.06214	-2.26997		-0.15183	-5.79564			-0.0625	-0.92857		-0.06338	-5.23135		-0.0622	-6.12208
-0.06256	-0.63392		-0.06233	-2.27728		-0.15183	-5.80263			-0.06256	-0.93083		-0.06371	-5.23615		-0.0718	-6.38073
-0.06256	-0.63465		-0.06237	-2.27913		-0.15183	-5.80623			-0.06262	-0.93263		-0.06377	-5.23906		-0.0718	-6.38497
-0.0723	-0.72764		-0.07226	-2.41854		-0.17533	-5.91282			-0.07236	-1.06506		-0.07339	-5.52115		-0.0718	-6.38827
-0.07248	-0.72987		-0.07226	-2.42577		-0.17598	-5.91983			-0.07236	-1.06869		-0.07344	-5.52656		-0.07194	-6.39155
-0.07267	-0.73151		-0.07226	-2.42916		-0.17664	-5.92271			-0.07236	-1.07172		-0.07344	-5.53176		-0.07197	-6.39354
-0.07269	-0.73299		-0.07226	-2.42813		-0.17666	-5.92466			-0.07236	-1.07392		-0.07344	-5.53661		-0.08193	-6.60222
-0.07269	-0.73389		-0.07257	-2.42396		-0.17666	-5.92615			-0.07274	-1.0752		-0.07344	-5.53915		-0.08193	-6.60501
-0.082	-0.82701		-0.08197	-2.51963		-0.20005	-5.9243			-0.08219	-1.20623		-0.08357	-5.78091		-0.08193	-6.60859
-0.0821	-0.8291		-0.08214	-2.52476		-0.20057	-5.97087			-0.08234	-1.20905		-0.08377	-5.78509		-0.08193	-6.61094
-0.08221	-0.83115		-0.08217	-2.53117		-0.20109	-5.99358			-0.08234	-1.21111		-0.0838	-5.78845		-0.08214	-6.61414
-0.08231	-0.83234		-0.08217	-2.53729		-0.19765	-6.0026			-0.08234	-1.21278		-0.0838	-5.79168		-0.09165	-6.79373
-0.08157	-0.83309		-0.08217	-2.54374		-0.19765	-6.00877			-0.08234	-1.21384		-0.0838	-5.79311		-0.09174	-6.7974
-0.09217	-0.92322		-0.09235	-2.62208		-0.22488	-6.1036			-0.09259	-1.34269		-0.09361	-5.99224		-0.09174	-6.79927
-0.09258	-0.92515		-0.09249	-2.62206		-0.22488	-6.10064			-0.09271	-1.3456		-0.09373	-5.99608		-0.09174	-6.80164
-0.09268	-0.92675		-0.09263	-2.62206		-0.22567	-6.09872			-0.09284	-1.34766		-0.09386	-5.999		-0.09174	-6.80291
-0.09278	-0.928		-0.09265	-2.61934		-0.22585	-6.09726			-0.09284	-1.34924		-0.09392	-6.00098		-0.10152	-6.95935
-0.09287	-0.92877		-0.09265	-2.6156		-0.22603	-6.09542			-0.09284	-1.35016		-0.09392	-6.00238		-0.10166	-6.96161
-0.1024	-1.01571		-0.10051	-2.57731		-0.25021	-6.16078			-0.10182	-1.47215		-0.1034	-6.16964		-0.1017	-6.96218
-0.1024	-1.0168		-0.10095	-2.62709		-0.25021	-6.15891			-0.10248	-1.4753		-0.1034	-6.17259		-0.1017	-6.96312
-0.1024	-1.01807		-0.10139	-2.65397		-0.25021	-6.14623			-0.10263	-1.47791		-0.10377	-6.1743		-0.1017	-6.96714
-0.10248	-1.01963		-0.10183	-2.67081		-0.25067	-6.14799			-0.10278	-1.47991		-0.10384	-6.17448		-0.10212	-6.97974
-0.10249	-1.02102		-0.10039	-2.68061		-0.25077	-6.15729			-0.10182	-1.48091		-0.10392	-6.17548		-0.10214	-6.97745
-0.10292	-1.01939		-0.10253	-2.70417		-0.27477	-6.23075			-0.10301	-1.48776		-0.10396	-6.18145		-0.10217	-6.97663
-0.10292	-1.01937		-0.10253	-2.70171		-0.27477	-6.23821			-0.10301	-1.48798		-0.10396	-6.18286		-0.10217	-6.97651
-0.10292	-1.01948		-0.10259	-2.6982		-0.27477	-6.24327			-0.10287	-1.48804		-0.10396	-6.18276		-0.10217	-6.97717
-0.10292	-1.01987		-0.1026	-2.69161		-0.27477	-6.24237			-0.10284	-1.48809		-0.10396	-6.18261		-0.12981	-7.33848
-0.10285	-1.02074		-0.10262	-2.68774		-0.27531	-6.23394			-0.1028	-1.48892		-0.10397	-6.18239		-0.13025	-7.34831
-0.13168	-1.25267		-0.13094	-2.84962		-0.29923	-6.26128			-0.1319	-1.83352		-0.133	-6.54974		-0.13068	-7.35243
-0.13168	-1.26245		-0.13193	-2.85599		-0.29977	-6.26575			-0.13207	-1.83897		-0.133	-6.55476		-0.13112	-7.35691
-0.13168	-1.26806		-0.13213	-2.86298		-0.29977	-6.27193			-0.13224	-1.84306		-0.13348	-6.55741		-0.12799	-7.36562
-0.13212	-1.27175		-0.13233	-2.87081		-0.29977	-6.27531			-0.1324	-1.84652		-0.13359	-6.5595		-0.16062	-7.65534
-0.1322	-1.27427		-0.13094	-2.88187		-0.29977	-6.27547			-0.13119	-1.84915		-0.1337	-6.56189		-0.16098	-7.65976
-0.16093	-1.50131		-0.16112	-2.98417		-0.32406	-6.30374			-0.1616	-2.17065		-0.16297	-6.81076		-0.16118	-7.6618
-0.16182	-1.50398		-0.16138	-2.98152		-0.32461	-6.3083			-0.16198	-2.17345		-0.16321	-6.81435		-0.16118	-7.66225
-0.16199	-1.50602		-0.16163	-2.97885		-0.32513	-6.30941			-0.16207	-2.17599		-0.16345	-6.81636		-0.16118	-7.66229
-0.16216	-1.50767		-0.15985	-2.97642		-0.32513	-6.30528			-0.16207	-2.17858		-0.16369	-6.81689		-0.1889	-7.84675
-0.16093	-1.50785		-0.15985	-2.97349		-0.32513	-6.29749			-0.16207	-2.1796		-0.16192	-6.81676		-0.18955	-7.85396
-0.19102	-1.70809		-0.19112	-3.09492		-0.34842	-6.30802			-0.19137	-2.45839		-0.19229	-6.98221		-0.1902	-7.86281
-0.19129	-1.71136		-0.19139	-3.09892		-0.34881	-6.3114			-0.19137	-2.46396		-0.19271	-6.99027		-0.19045	-7.8682
-0.19142	-1.71358		-0.19139	-3.09648		-0.34919	-6.31704			-0.19137	-2.46872		-0.19271	-6.99471		-0.19045	-7.87141
-0.19142	-1.71456		-0.19139	-3.08882		-0.34658	-6.32366			-0.19137	-2.47205		-0.19271	-6.9978		-0.22011	-8.04455
-0.19142	-1.71525		-0.19139	-3.08046		-0.34658	-6.32704			-0.19184	-2.47404		-0.19271	-6.99961		-0.22021	-8.0496
-0.22131	-1.89673		-0.22088	-3.12102		-0.3723	-6.35631			-0.22111	-2.72965		-0.22268	-7.13388		-0.22021	-8.05361
-0.22131	-1.89928		-0.22088	-3.12368		-0.37377	-6.36179			-0.22111	-2.73334		-0.22275	-7.13512		-0.22021	-8.05614
-0.22131	-1.90147		-0.22088	-3.12385		-0.3741	-6.36777			-0.22142	-2.73551		-0.22275	-7.13629		-0.22021	-8.05667
-0.22131	-1.90267		-0.2215	-3.12495		-0.37443	-6.37006			-0.22149	-2.7375		-0.22275	-7.13735		-0.24911	-8.18513
-0.22165	-1.9035		-0.22164	-3.1298		-0.37476	-6.36564			-0.22157	-2.73838		-0.22275	-7.13797		-0.24911	-8.1811
-0.25013	-2.054		-0.25009	-3.16722		-0.39788	-6.36321			-0.24988	-2.96084		-0.25232	-7.24432		-0.24911	-8.17843
-0.25013	-2.05712		-0.25096	-3.17095		-0.39788	-6.35969			-0.25072	-2.96461		-0.25232	-7.24605		-0.24956	-8.17745
-0.25082	-2.0592		-0.25116	-3.17455		-0.39888	-6.35941			-0.25092	-2.96802		-0.25232	-7.24729		-0.24966	-8.17895
-0.25097	-2.0621		-0.25136	-3.17874		-0.39911	-6.36335			-0.25113	-2.97116		-0.25266	-7.24782		-0.27842	-8.29003
-0.25112	-2.06317		-0.25155	-3.18127		-0.39934	-6.36855			-0.25133	-2.97358		-0.25273	-7.2478		-0.27901	-8.29127
-0.28034	-2.20282		-0.28048	-3.21803		-0.42279	-6.35603			-0.28047	-3.17671		-0.28158	-7.33611		-0.27913	-8.28918
-0.28057	-2.20485		-0.28085	-3.21325		-0.42279	-6.36852			-0.28076	-3.17874		-0.28233	-7.33706		-0.27925	-8.28698
-0.28081	-2.20736		-0.28122	-3.21086		-0.42279	-6.37777			-0.28105	-3.1811		-0.28249	-7.33732		-0.27842	-8.28672
-0.27923	-2.20885		-0.28122	-3.21366		-0.42349	-6.38235			-0.28112	-3.18326		-0.28264	-7.33773		-0.30832	-8.36838
-0.27923	-2.20976		-0.28122	-3.21871		-0.42366	-6.38383			-0.28112	-3.18448		-0.28158	-7.33724		-0.30859	-8.37019
-0.30991	-2.33311		-0.31021	-3.23544		-0.44823	-6.38969			-0.31046	-3.33893		-0.31201	-7.4067		-0.30875	-8.37232
-0.31028	-2.33526		-0.31022	-3.24448		-0.44823	-6.38723			-0.31071	-3.35103		-0.31233	-7.40752		-0.30875	-8.37335
-0.31034	-2.33732		-0.31022	-3.25145		-0.44823	-6.38221			-0.31071	-3.35939		-0.31258	-7.40803		-0.30875	-8.37464
-0.31034	-2.33869		-0.31022	-3.25548		-0.44823	-6.37712			-0.31071	-3.36369		-0.31258	-7.40886		-0.33835	-8.42312
-0.31034	-2.34009		-0.31057	-3.2547		-0.44846	-6.37232			-0.31071	-3.36625		-0.31258	-7.40812		-0.33835	-8.42197
-0.33978	-2.45578		-0.33953	-3.26101		-0.47246	-6.36176			-0.34037	-3.5279		-0.34203	-7.46582		-0.33835	-8.42127
-0.33978	-2.45662		-0.33953	-3.26112		-0.47311	-6.3612			-0.34037	-3.52753		-0.34203	-7.46782		-0.33835	-8.42255
-0.33978	-2.45772		-0.33953	-3.26203		-0.47311	-6.36106			-0.34037	-3.52855		-0.34203	-7.46842		-0.33868	-8.42168
-0.33978	-2.45899		-0.34022	-3.26494		-0.47311	-6.35936			-0.34037	-3.52982		-0.34203	-7.4687		-0.36752	-8.46604
-0.34023	-2.45992		-0.34036	-3.26851		-0.47311	-6.35771			-0.34071	-3.53082		-0.34243	-7.46874		-0.36752	-8.47209
-0.36918	-2.55832		-0.36856	-3.3018		-0.49606	-6.53514			-0.36927	-3.67504		-0.37146	-7.5262		-0.36808	-8.4751
-0.36918	-2.56002		-0.36856	-3.29511		-0.49677	-6.44813			-0.36927	-3.67716		-0.37146	-7.52474		-0.3682	-8.47588
-0.36918	-2.56026		-0.36938	-3.28842		-0.49747	-6.40047			-0.36999	-3.67889		-0.37192	-7.52358		-0.36832	-8.4762
-0.36957	-2.55964		-0.36955	-3.28252		-0.49277	-6.37204			-0.37014	-3.67975		-0.37203	-7.52376		-0.39588	-8.53752
-0.36966	-2.5598		-0.36972	-3.27927		-0.49277	-6.36408			-0.37029	-3.68129		-0.37214	-7.52376		-0.39693	-8.53991
-0.3984	-2.6488		-0.39762	-3.35044		-0.52119	-6.39743			-0.39794	-3.80111		-0.40132	-7.58189		-0.39716	-8.5411
-0.39884	-2.64789		-0.39887	-3.35263		-0.52237	-6.39782			-0.39895	-3.80518		-0.40153	-7.58006		-0.39739	-8.54143
-0.39895	-2.64837		-0.39913	-3.35328		-0.52261	-6.39559			-0.39916	-3.80901		-0.40174	-7.57908		-0.39588	-8.54101
-0.39905	-2.64869		-0.39939	-3.34802		-0.52285	-6.39179			-0.39938	-3.81213		-0.40194	-7.57852		-0.42628	-8.57394
-0.39916	-2.64819		-0.39762	-3.33948		-0.52119	-6.39064			-0.39794	-3.81305		-0.4012	-7.57844		-0.42659	-8.57241
-0.42875	-2.73623		-0.42867	-3.32076		-0.54645	-6.37888			-0.42878	-3.93603		-0.43101	-7.61164		-0.42691	-8.56482
-0.42896	-2.73623		-0.42896	-3.31562		-0.54727	-6.37807			-0.42901	-3.93681		-0.43137	-7.61124		-0.42473	-8.56049
-0.42916	-2.73759		-0.42917	-3.31411		-0.54748	-6.37777			-0.42925	-3.93763		-0.43174	-7.61148		-0.42473	-8.56531
-0.42775	-2.73932		-0.42917	-3.31423		-0.54768	-6.38025			-0.42925	-3.9376		-0.43186	-7.61156		-0.45597	-8.63787
-0.42775	-2.73993		-0.42917	-3.31382		-0.54789	-6.38274			-0.42925	-3.93729		-0.43186	-7.61106		-0.45644	-8.63089
-0.45832	-2.81095		-0.45903	-3.33696		-0.57164	-6.39265			-0.45906	-4.04361		-0.46064	-7.651		-0.45644	-8.63038
-0.45855	-2.8102		-0.45905	-3.33448		-0.57164	-6.38927			-0.45918	-4.04608		-0.46075	-7.64848		-0.45644	-8.63019
-0.45855	-2.80936		-0.45905	-3.33469		-0.57164	-6.38447			-0.45918	-4.04738		-0.46075	-7.64626		-0.45644	-8.63356
-0.45855	-2.80858		-0.45905	-3.33862		-0.57262	-6.3824			-0.45918	-4.04695		-0.46075	-7.64479		-0.48565	-8.67461
-0.45855	-2.80949		-0.4592	-3.34446		-0.57284	-6.38271			-0.45918	-4.04614		-0.46075	-7.64474		-0.48565	-8.67822
-0.48782	-2.88038		-0.48796	-3.35275		-0.59716	-6.37466			-0.48856	-4.13951		-0.49054	-7.67756		-0.48565	-8.67948
-0.48782	-2.8811		-0.48796	-3.36035		-0.59716	-6.37257			-0.48856	-4.1405		-0.49054	-7.67691		-0.48628	-8.68042
-0.48782	-2.88182		-0.48796	-3.36695		-0.59716	-6.37193			-0.48856	-4.14121		-0.49054	-7.67642		-0.48643	-8.68271
-0.48836	-2.88206		-0.48865	-3.37004		-0.59716	-6.37223			-0.48919	-4.14284		-0.49082	-7.67674		-0.51493	-8.68925
-0.48848	-2.8819		-0.48881	-3.36805		-0.59783	-6.37237			-0.48932	-4.14207		-0.49088	-7.67683		-0.51547	-8.69424
-0.51726	-2.94002		-0.5178	-3.38374		-0.62119	-6.39955			-0.51758	-4.23154		-0.52035	-7.70455		-0.51559	-8.69855
-0.51795	-2.94176		-0.5178	-3.37922		-0.62187	-6.39807			-0.51758	-4.23329		-0.52093	-7.70495		-0.51571	-8.70201
-0.5181	-2.94333		-0.51838	-3.37335		-0.62243	-6.39777			-0.51859	-4.23394		-0.52107	-7.70414		-0.51493	-8.70445
-0.51826	-2.94425		-0.5185	-3.36798		-0.62243	-6.3943			-0.5188	-4.23328		-0.52121	-7.70367		-0.54497	-8.72162
-0.51841	-2.94505		-0.51862	-3.36189		-0.62243	-6.38966			-0.51902	-4.23331		-0.52135	-7.7043		-0.54518	-8.72079
-0.54764	-3.00441		-0.54734	-3.38282		-0.64668	-6.39109			-0.54817	-4.31001		-0.55033	-7.73233		-0.54539	-8.7189
-0.54799	-3.00224		-0.54773	-3.38009		-0.64711	-6.39134			-0.54842	-4.31124		-0.55062	-7.73214		-0.54539	-8.71466
-0.54835	-3.00192		-0.54812	-3.37834		-0.64753	-6.38911			-0.54867	-4.31385		-0.55091	-7.73164		-0.54539	-8.71073
-0.54839	-3.00207		-0.54851	-3.37602		-0.64475	-6.38425			-0.54892	-4.31689		-0.55098	-7.73089		-0.57509	-8.72353
-0.54839	-3.00207		-0.54571	-3.37033		-0.64475	-6.38257			-0.54709	-4.3181		-0.55098	-7.73161		-0.57509	-8.72925
-0.57764	-3.05603		-0.5771	-3.38375		-0.67077	-6.3567			-0.57824	-4.38264		-0.58073	-7.75736		-0.57509	-8.73504
-0.5778	-3.05733		-0.57785	-3.38922		-0.67249	-6.36067			-0.57868	-4.38161		-0.58097	-7.75748		-0.57509	-8.74072
-0.5778	-3.05844		-0.57821	-3.39031		-0.67288	-6.36472			-0.57891	-4.38025		-0.58097	-7.75765		-0.57554	-8.74168
-0.5778	-3.05806		-0.57821	-3.38812		-0.67327	-6.36489			-0.57891	-4.38241		-0.58097	-7.75803		-0.60441	-8.73419
-0.5778	-3.05661		-0.57821	-3.38228		-0.67366	-6.36232			-0.57891	-4.38402		-0.58097	-7.75808		-0.60441	-8.73152
-0.60783	-3.1042		-0.60864	-3.39854		-0.69668	-6.34274			-0.60843	-4.4528		-0.61136	-7.77974		-0.60498	-8.73267
-0.60783	-3.10258		-0.60864	-3.39786		-0.69668	-6.35084			-0.60843	-4.45311		-0.61136	-7.77985		-0.60511	-8.73354
-0.60783	-3.1012		-0.60864	-3.3984		-0.69774	-6.35916			-0.60843	-4.45304		-0.61136	-7.77941		-0.60524	-8.73007
-0.60783	-3.10047		-0.60864	-3.39908		-0.69797	-6.36372			-0.60843	-4.45326		-0.61168	-7.77832		-0.63503	-8.74792
-0.60832	-3.10003		-0.6087	-3.39916		-0.69821	-6.36318			-0.60884	-4.45386		-0.61175	-7.77744		-0.63529	-8.74979
-0.63757	-3.13642		-0.6381	-3.43327		-0.72216	-6.37561			-0.63784	-4.51551		-0.64094	-7.79871		-0.63555	-8.753
-0.63757	-3.14057		-0.6381	-3.43363		-0.72216	-6.36282			-0.63784	-4.5161		-0.64149	-7.79814		-0.63388	-8.75545
-0.63825	-3.14339		-0.63851	-3.43356		-0.72216	-6.35159			-0.63853	-4.51709		-0.64162	-7.7982		-0.63388	-8.75651
-0.63839	-3.1451		-0.63861	-3.43284		-0.72216	-6.34645			-0.6387	-4.51701		-0.64175	-7.79765		-0.66475	-8.77182
-0.63854	-3.14587		-0.6387	-3.43172		-0.72311	-6.34665			-0.63886	-4.51713		-0.64189	-7.79885		-0.66534	-8.77756
-0.66786	-3.17402		-0.66734	-3.43289		-0.7477	-6.34223			-0.66771	-4.56665		-0.67122	-7.81921		-0.6658	-8.78099
-0.66813	-3.17398		-0.66815	-3.43185		-0.74823	-6.34416			-0.66865	-4.56699		-0.67149	-7.81879		-0.6658	-8.78236
-0.66839	-3.17402		-0.66833	-3.43349		-0.74823	-6.34704			-0.66883	-4.5683		-0.67175	-7.8197		-0.6658	-8.78234
-0.66662	-3.17432		-0.66851	-3.43758		-0.74823	-6.35173			-0.66901	-4.57003		-0.67179	-7.82086		-0.6938	-8.8041
-0.66662	-3.175		-0.66869	-3.44218		-0.74823	-6.35411			-0.66771	-4.57174		-0.67179	-7.82056		-0.69425	-8.80565
-0.69791	-3.22199		-0.69802	-3.42911		-0.77213	-6.34642			-0.69888	-4.62605		-0.70179	-7.84165		-0.69469	-8.80731
-0.69824	-3.22208		-0.69836	-3.43015		-0.77274	-6.33958			-0.69933	-4.62691		-0.70184	-7.84202		-0.69513	-8.80791
-0.69824	-3.22203		-0.6987	-3.43072		-0.77336	-6.33503			-0.69953	-4.62679		-0.70184	-7.8427		-0.69179	-8.80119
-0.69824	-3.22166		-0.69872	-3.42916		-0.77361	-6.33268			-0.69953	-4.62753		-0.70184	-7.84371		-0.72436	-8.83098
-0.69824	-3.22156		-0.69872	-3.42429		-0.77361	-6.33296			-0.69953	-4.62877		-0.70184	-7.84277		-0.7248	-8.833
-0.72784	-3.25439		-0.72846	-3.42175		-0.79651	-6.31709			-0.72905	-4.6917		-0.73188	-7.85885		-0.72523	-8.83414
-0.72784	-3.2529		-0.72864	-3.41987		-0.79651	-6.31818			-0.72905	-4.68747		-0.73188	-7.85862		-0.72204	-8.83339
-0.72784	-3.25107		-0.72864	-3.41956		-0.79805	-6.31612			-0.72905	-4.68638		-0.73188	-7.85858		-0.72204	-8.83113
-0.72832	-3.24828		-0.72864	-3.42111		-0.79838	-6.31444			-0.72905	-4.68591		-0.73239	-7.86061		-0.75501	-8.83745
-0.72842	-3.24533		-0.72864	-3.42371		-0.79871	-6.31059			-0.72958	-4.68446		-0.7325	-7.86076		-0.75546	-8.83642
-0.75749	-3.28339		-0.75866	-3.46513		-0.82256	-6.31187			-0.75898	-4.72199		-0.76128	-7.87542		-0.75546	-8.83321
-0.75859	-3.28305		-0.75866	-3.46403		-0.82256	-6.30676			-0.75898	-4.72179		-0.76128	-7.87515		-0.75546	-8.82675
-0.75883	-3.28173		-0.75866	-3.46389		-0.82256	-6.29799			-0.75962	-4.72142		-0.76216	-7.8748		-0.75546	-8.81935
-0.75907	-3.28026		-0.75941	-3.46223		-0.82369	-6.30056			-0.75976	-4.72202		-0.76234	-7.87574		-0.78477	-8.84178
-0.75749	-3.2796		-0.75956	-3.45532		-0.82393	-6.31531			-0.7599	-4.72243		-0.76253	-7.87455		-0.78477	-8.8414
-0.78866	-3.3094		-0.78819	-3.42311		-0.84824	-6.29665			-0.78822	-4.76715		-0.79251	-7.89339		-0.78477	-8.84152
-0.78899	-3.31164		-0.78927	-3.42787		-0.84824	-6.30123			-0.78822	-4.76802		-0.79273	-7.89221		-0.78477	-8.83984
-0.78931	-3.31268		-0.7895	-3.4338		-0.84824	-6.31291			-0.78822	-4.76851		-0.79294	-7.89094		-0.78524	-8.83712
-0.78937	-3.31244		-0.78973	-3.43856		-0.84824	-6.31318			-0.78951	-4.76947		-0.79152	-7.89039		-0.81466	-8.83483
-0.78937	-3.31352		-0.78819	-3.44355		-0.84873	-6.31156			-0.78977	-4.7698		-0.79152	-7.89029		-0.81466	-8.83337
-0.81851	-3.33849		-0.81876	-3.45989		-0.87338	-6.28612			-0.81843	-4.80869		-0.82254	-7.90795		-0.81528	-8.82958
-0.81854	-3.33936		-0.81918	-3.4627		-0.87363	-6.27411			-0.8196	-4.80917		-0.82286	-7.90903		-0.81542	-8.8263
-0.81854	-3.34033		-0.81942	-3.46648		-0.87363	-6.2662			-0.81984	-4.81032		-0.82286	-7.90862		-0.81557	-8.82565
-0.81854	-3.34142		-0.81942	-3.46918		-0.87363	-6.26972			-0.82009	-4.81191		-0.82286	-7.90791		-0.8447	-8.85161
-0.81854	-3.34237		-0.81942	-3.4706		-0.87363	-6.27374			-0.81843	-4.8132		-0.82286	-7.90955		-0.84497	-8.84532
-0.84865	-3.36122		-0.84826	-3.45323		-0.8973	-6.27874			-0.84929	-4.83985		-0.85287	-7.92048		-0.84524	-8.84375
-0.84865	-3.36112		-0.84866	-3.45977		-0.8979	-6.28022			-0.84962	-4.84017		-0.85287	-7.92023		-0.84551	-8.84674
-0.84901	-3.36059		-0.84866	-3.46526		-0.89801	-6.27922			-0.84982	-4.84022		-0.85287	-7.91948		-0.84452	-8.85319
-0.84909	-3.36072		-0.84866	-3.4688		-0.89801	-6.27849			-0.84982	-4.84037		-0.85312	-7.91961		-0.87456	-8.85958
-0.84918	-3.36087		-0.84866	-3.46925		-0.89801	-6.27804			-0.84982	-4.8409		-0.85318	-7.91985		-0.87493	-8.85637
-0.87757	-3.38645		-0.87853	-3.48845		-0.92193	-6.2867			-0.87966	-4.88154		-0.88216	-7.93327		-0.87498	-8.85511
-0.87851	-3.38583		-0.87853	-3.4872		-0.92244	-6.27648			-0.87966	-4.88175		-0.88299	-7.93286		-0.87498	-8.85454
-0.8787	-3.38432		-0.87853	-3.4848		-0.92296	-6.26567			-0.87966	-4.88168		-0.8832	-7.93324		-0.87498	-8.85421
-0.87889	-3.38281		-0.87901	-3.48188		-0.92297	-6.25651			-0.87966	-4.88226		-0.88341	-7.93326		-0.90379	-8.85677
-0.87757	-3.38232		-0.87911	-3.47816		-0.92297	-6.25422			-0.87973	-4.88406		-0.88361	-7.93324		-0.90416	-8.85407
-0.90808	-3.40047		-0.90684	-3.49606		-0.94647	-6.18592			-0.90834	-4.91783		-0.91244	-7.94698		-0.90416	-8.85232
-0.90848	-3.39969		-0.90792	-3.49717		-0.94689	-6.18997			-0.90834	-4.91833		-0.91269	-7.9475		-0.90416	-8.85269
-0.90873	-3.39837		-0.90814	-3.49899		-0.94731	-6.19402			-0.90903	-4.91972		-0.91295	-7.9468		-0.90416	-8.85686
-0.90873	-3.398		-0.90837	-3.49874		-0.94446	-6.19983			-0.90918	-4.92112		-0.91117	-7.9472		-0.93311	-8.86197
-0.90873	-3.39818		-0.90684	-3.49541		-0.94446	-6.20207			-0.90934	-4.92218		-0.91117	-7.94636		-0.93311	-8.86021
-0.9376	-3.42369		-0.93727	-3.46226		-0.96935	-6.19899			-0.93808	-4.95073		-0.94206	-7.9557		-0.93311	-8.85946
-0.9376	-3.42541		-0.93769	-3.46806		-0.97065	-6.19905			-0.93835	-4.95229		-0.94233	-7.95656		-0.93353	-8.85789
-0.9376	-3.42602		-0.93795	-3.47591		-0.97093	-6.19916			-0.93862	-4.953		-0.94233	-7.95736		-0.93362	-8.85782
-0.9376	-3.42615		-0.93795	-3.48263		-0.97121	-6.19598			-0.93889	-4.95352		-0.94233	-7.95767		-0.96142	-8.87684
-0.93808	-3.4265		-0.93795	-3.48847		-0.96935	-6.19031			-0.93686	-4.9539		-0.94233	-7.95694		-0.96142	-8.88049
-0.96652	-3.44018		-0.96656	-3.4927		-0.9934	-6.14589			-0.96726	-4.98236		-0.97068	-7.96995		-0.96221	-8.88096
-0.96652	-3.44018		-0.96656	-3.4997		-0.9934	-6.15109			-0.96771	-4.98322		-0.97068	-7.96952		-0.96237	-8.87939
-0.96695	-3.44078		-0.96656	-3.50458		-0.9948	-6.14754			-0.96783	-4.98354		-0.97068	-7.96929		-0.96253	-8.87681
-0.96705	-3.4409		-0.96656	-3.50426		-0.99508	-6.13969			-0.96783	-4.98401		-0.97137	-7.96786		-0.99074	-8.88304
-0.96715	-3.44031		-0.96672	-3.49908		-0.99536	-6.13539			-0.96783	-4.98491		-0.97152	-7.96738		-0.99101	-8.88302
-0.9949	-3.45948		-0.9944	-3.4807		-0.97237	-6.16187			-0.99573	-5.00872		-0.9988	-7.98347		-0.99129	-8.88241
-0.99517	-3.46066		-0.9944	-3.4814		-0.97237	-6.14642			-0.99573	-5.00905		-0.99967	-7.98445		-0.98941	-8.87913
-0.99544	-3.46148		-0.99513	-3.48267		-0.97237	-6.14346			-0.99573	-5.00944		-0.99986	-7.98383		-0.98941	-8.87682
-0.99571	-3.46264		-0.9953	-3.48324		-0.97221	-6.15304			-0.99604	-5.01042		-1.00005	-7.98415		-0.96299	-8.85145
-0.99377	-3.46337		-0.99546	-3.48445		-0.97218	-6.16316			-0.99611	-5.01083		-0.9988	-7.98415		-0.96274	-8.8548
-0.96771	-3.45735		-0.96752	-3.4768		-0.948	-6.18464			-0.96868	-4.98607		-0.97175	-7.974		-0.96274	-8.8589
-0.9675	-3.45444		-0.96693	-3.47483		-0.948	-6.18316			-0.96818	-4.98562		-0.97161	-7.97259		-0.96274	-8.86106
-0.96729	-3.45135		-0.9668	-3.47363		-0.948	-6.18492			-0.96806	-4.98444		-0.97147	-7.97095		-0.96274	-8.86291
-0.96723	-3.44893		-0.96667	-3.47304		-0.948	-6.18411			-0.96794	-4.98339		-0.97133	-7.96977		-0.93399	-8.88621
-0.96723	-3.44687		-0.96752	-3.47277		-0.94758	-6.18271			-0.96782	-4.98305		-0.97241	-7.96905		-0.93399	-8.88609
-0.93807	-3.42922		-0.93767	-3.47739		-0.9234	-6.17933			-0.93889	-4.95558		-0.94247	-7.95939		-0.93399	-8.88368
-0.93768	-3.42783		-0.93743	-3.4758		-0.92306	-6.18145			-0.93876	-4.95448		-0.94225	-7.95736		-0.93399	-8.88003
-0.93759	-3.42694		-0.93723	-3.47676		-0.92306	-6.18229			-0.93862	-4.95326		-0.94204	-7.95611		-0.93377	-8.87555
-0.93759	-3.42727		-0.93723	-3.47834		-0.92306	-6.18508			-0.93848	-4.95183		-0.94201	-7.95477		-0.90461	-8.86089
-0.93759	-3.42825		-0.93723	-3.47828		-0.92306	-6.18567			-0.93946	-4.94919		-0.94201	-7.95417		-0.90461	-8.86326
-0.90821	-3.40005		-0.90756	-3.47698		-0.89866	-6.26567			-0.90953	-4.92751		-0.91202	-7.94636		-0.90461	-8.86679
-0.9081	-3.40135		-0.90756	-3.47675		-0.89819	-6.26483			-0.90934	-4.92669		-0.91196	-7.94603		-0.90425	-8.86644
-0.9081	-3.40282		-0.90756	-3.47763		-0.89792	-6.26207			-0.90916	-4.92526		-0.91196	-7.94552		-0.90416	-8.86407
-0.9081	-3.40411		-0.90756	-3.47653		-0.89792	-6.25453			-0.91045	-4.92434		-0.91196	-7.94615		-0.87463	-8.81681
-0.9081	-3.40386		-0.90755	-3.4676		-0.89792	-6.24349			-0.91045	-4.92426		-0.91196	-7.94665		-0.87463	-8.8159
-0.87888	-3.38253		-0.878	-3.46665		-0.87567	-6.22567			-0.87908	-4.88863		-0.88267	-7.93764		-0.87463	-8.81614
-0.87888	-3.3806		-0.878	-3.47589		-0.87416	-6.23112			-0.8789	-4.88936		-0.88267	-7.93698		-0.87448	-8.81557
-0.87866	-3.37876		-0.87784	-3.48086		-0.87386	-6.24916			-0.8789	-4.89032		-0.88267	-7.93539		-0.87445	-8.81689
-0.87861	-3.37625		-0.8778	-3.47974		-0.87355	-6.24628			-0.8789	-4.88972		-0.88267	-7.93485		-0.84504	-8.83442
-0.87856	-3.37436		-0.87776	-3.47418		-0.87567	-6.24003			-0.8789	-4.88958		-0.88243	-7.93388		-0.84467	-8.83337
-0.84931	-3.35795		-0.84862	-3.48955		-0.84911	-6.26045			-0.84935	-4.8581		-0.85272	-7.91889		-0.8446	-8.83258
-0.84848	-3.35822		-0.84791	-3.48966		-0.84911	-6.2595			-0.84935	-4.85701		-0.85272	-7.91809		-0.84452	-8.83234
-0.84831	-3.3597		-0.84774	-3.48847		-0.84834	-6.25969			-0.84935	-4.85669		-0.85234	-7.91797		-0.84504	-8.83298
-0.84814	-3.36207		-0.84759	-3.48659		-0.84818	-6.25547			-0.84913	-4.8575		-0.85226	-7.91997		-0.81513	-8.84435
-0.84931	-3.36572		-0.84862	-3.48533		-0.84801	-6.25075			-0.84907	-4.85616		-0.85218	-7.91936		-0.81488	-8.84429
-0.8188	-3.3342		-0.81804	-3.44549		-0.824	-6.26335			-0.81946	-4.81975		-0.8221	-7.90667		-0.81463	-8.84234
-0.8186	-3.337		-0.81781	-3.44968		-0.824	-6.24302			-0.81946	-4.81894		-0.82187	-7.90668		-0.81453	-8.83927
-0.81839	-3.3397		-0.81759	-3.45144		-0.824	-6.23128			-0.81898	-4.81742		-0.82164	-7.90664		-0.81453	-8.83644
-0.81975	-3.34231		-0.81757	-3.45113		-0.82341	-6.22894			-0.81888	-4.8159		-0.82317	-7.90656		-0.78481	-8.82829
-0.81975	-3.34352		-0.81757	-3.45712		-0.82327	-6.22944			-0.81877	-4.81358		-0.82317	-7.90635		-0.7844	-8.83258
-0.78847	-3.31789		-0.78783	-3.45483		-0.799	-6.31036			-0.78971	-4.77538		-0.79178	-7.89233		-0.78416	-8.83805
-0.78809	-3.31718		-0.78738	-3.45109		-0.79846	-6.29908			-0.789	-4.7757		-0.79157	-7.89179		-0.78416	-8.83918
-0.78784	-3.31628		-0.78733	-3.44832		-0.79846	-6.2888			-0.78883	-4.77582		-0.79157	-7.89073		-0.78416	-8.83853
-0.78784	-3.31586		-0.78733	-3.44705		-0.79846	-6.28433			-0.78867	-4.77513		-0.79157	-7.8888		-0.75461	-8.82258
-0.78784	-3.31469		-0.78733	-3.44682		-0.79846	-6.28073			-0.78851	-4.77471		-0.79157	-7.88859		-0.75461	-8.82768
-0.75819	-3.28569		-0.75743	-3.4634		-0.77401	-6.30212			-0.75895	-4.72849		-0.76128	-7.87614		-0.75461	-8.82752
-0.75807	-3.2854		-0.75743	-3.46332		-0.7736	-6.30335			-0.75872	-4.72706		-0.76128	-7.87638		-0.75461	-8.82291
-0.75807	-3.28466		-0.75743	-3.46167		-0.77319	-6.29693			-0.75849	-4.72666		-0.76128	-7.87686		-0.75407	-8.82136
-0.75807	-3.28344		-0.75701	-3.45852		-0.776	-6.2914			-0.75847	-4.72648		-0.76128	-7.87673		-0.7243	-8.79839
-0.75807	-3.2819		-0.75691	-3.45386		-0.776	-6.29372			-0.75847	-4.72652		-0.76097	-7.87511		-0.7243	-8.80017
-0.72755	-3.25164		-0.72773	-3.4256		-0.74903	-6.2807			-0.72872	-4.67619		-0.73113	-7.85695		-0.7243	-8.80531
-0.72755	-3.24974		-0.72773	-3.42919		-0.74903	-6.28441			-0.72832	-4.67556		-0.73113	-7.85579		-0.72387	-8.81037
-0.72755	-3.24822		-0.72706	-3.43359		-0.74805	-6.28975			-0.7283	-4.67527		-0.73113	-7.85548		-0.72378	-8.813
-0.72754	-3.24817		-0.7269	-3.43645		-0.74785	-6.29441			-0.7283	-4.67494		-0.73072	-7.85509		-0.6947	-8.7877
-0.72754	-3.24826		-0.72675	-3.43814		-0.74765	-6.2993			-0.7283	-4.67398		-0.73062	-7.85339		-0.6947	-8.78752
-0.69823	-3.22284		-0.69773	-3.43226		-0.72315	-6.31589			-0.69826	-4.62708		-0.70132	-7.83809		-0.69426	-8.78742
-0.69823	-3.22103		-0.697	-3.42581		-0.72315	-6.32059			-0.69826	-4.62669		-0.70076	-7.83771		-0.69417	-8.78588
-0.69756	-3.2182		-0.69683	-3.42381		-0.72315	-6.32623			-0.69826	-4.6257		-0.70063	-7.83671		-0.69407	-8.78129
-0.69742	-3.21544		-0.69665	-3.42444		-0.72315	-6.33534			-0.69826	-4.62485		-0.7005	-7.83594		-0.66502	-8.76469
-0.69727	-3.21334		-0.69648	-3.42835		-0.72238	-6.34366			-0.69796	-4.62474		-0.70037	-7.83632		-0.66446	-8.76866
-0.66844	-3.18373		-0.66711	-3.4118		-0.69831	-6.36265			-0.66836	-4.57378		-0.67049	-7.82215		-0.66433	-8.77229
-0.66781	-3.18231		-0.66683	-3.41559		-0.69762	-6.36338			-0.66836	-4.57203		-0.67025	-7.82276		-0.66421	-8.77661
-0.66767	-3.18063		-0.66655	-3.42089		-0.69762	-6.36279			-0.66836	-4.57218		-0.67002	-7.82206		-0.66408	-8.77723
-0.66752	-3.17993		-0.66627	-3.42751		-0.69762	-6.36453			-0.66794	-4.57318		-0.6717	-7.82106		-0.63471	-8.7801
-0.66738	-3.1796		-0.66832	-3.43097		-0.69762	-6.36863			-0.66783	-4.57232		-0.6717	-7.81935		-0.63448	-8.78105
-0.63766	-3.14524		-0.63676	-3.41833		-0.67336	-6.35436			-0.6385	-4.52392		-0.64042	-7.79758		-0.63426	-8.77885
-0.63746	-3.14547		-0.63637	-3.41861		-0.67284	-6.35291			-0.63772	-4.52276		-0.64001	-7.798		-0.63403	-8.77386
-0.63727	-3.14492		-0.63601	-3.41953		-0.67232	-6.35047			-0.63754	-4.52129		-0.63978	-7.79859		-0.63568	-8.76805
-0.63708	-3.144		-0.63601	-3.42099		-0.6759	-6.34726			-0.63736	-4.52014		-0.63978	-7.79847		-0.60411	-8.77087
-0.63848	-3.14248		-0.63601	-3.42017		-0.6759	-6.34413			-0.63718	-4.52		-0.63978	-7.79848		-0.60374	-8.77504
-0.60728	-3.10141		-0.60647	-3.37747		-0.64906	-6.36693			-0.60797	-4.46238		-0.61012	-7.7798		-0.60366	-8.77595
-0.607	-3.10022		-0.60592	-3.3812		-0.64774	-6.37251			-0.60775	-4.4607		-0.60979	-7.77941		-0.60366	-8.77351
-0.60671	-3.09933		-0.60591	-3.38048		-0.64742	-6.37696			-0.60753	-4.45982		-0.60979	-7.7785		-0.60366	-8.76825
-0.60871	-3.09887		-0.60591	-3.37634		-0.64709	-6.38291			-0.6073	-4.45901		-0.60979	-7.77856		-0.5743	-8.747
-0.60871	-3.09891		-0.60591	-3.37384		-0.64676	-6.38869			-0.60895	-4.45775		-0.60979	-7.77909		-0.5743	-8.74277
-0.57721	-3.05417		-0.57601	-3.42273		-0.62304	-6.36877			-0.57767	-4.39781		-0.5793	-7.75997		-0.5743	-8.74141
-0.57685	-3.05406		-0.57601	-3.42439		-0.62304	-6.3681			-0.5773	-4.39694		-0.5793	-7.75915		-0.5743	-8.73981
-0.57664	-3.05447		-0.57601	-3.42577		-0.62304	-6.36774			-0.57701	-4.39598		-0.5793	-7.75724		-0.57406	-8.74065
-0.57664	-3.05439		-0.57601	-3.42855		-0.62234	-6.36441			-0.57701	-4.39574		-0.5793	-7.75527		-0.5446	-8.73906
-0.57664	-3.05455		-0.5759	-3.43308		-0.62218	-6.35545			-0.57701	-4.39489		-0.57923	-7.75447		-0.5446	-8.73361
-0.5472	-3.00506		-0.54619	-3.40822		-0.59694	-6.36877			-0.54743	-4.32217		-0.54974	-7.73138		-0.5446	-8.72686
-0.54696	-3.00407		-0.54619	-3.41008		-0.59693	-6.3676			-0.54708	-4.32187		-0.54974	-7.73073		-0.54399	-8.72288
-0.54696	-3.00174		-0.54619	-3.41044		-0.59693	-6.36751			-0.54708	-4.32124		-0.54928	-7.72977		-0.54387	-8.72454
-0.54696	-3.00073		-0.54571	-3.40896		-0.59693	-6.36288			-0.54708	-4.32075		-0.54917	-7.72953		-0.51552	-8.69262
-0.54696	-3.00065		-0.5456	-3.40975		-0.59693	-6.3524			-0.54708	-4.32043		-0.54907	-7.72759		-0.51476	-8.68976
-0.51734	-2.93836		-0.51656	-3.3791		-0.57206	-6.37746			-0.5173	-4.24326		-0.51936	-7.70397		-0.51458	-8.68663
-0.51734	-2.93802		-0.51656	-3.37511		-0.57164	-6.37961			-0.5173	-4.24174		-0.51924	-7.70414		-0.51441	-8.68211
-0.51734	-2.93847		-0.5162	-3.37653		-0.57164	-6.37751			-0.5173	-4.24075		-0.51912	-7.70323		-0.51552	-8.67709
-0.51686	-2.93972		-0.51611	-3.38039		-0.57164	-6.3738			-0.5173	-4.23914		-0.519	-7.70239		-0.48503	-8.65757
-0.51676	-2.94136		-0.51602	-3.38348		-0.57164	-6.37128			-0.51699	-4.23879		-0.51985	-7.70294		-0.48476	-8.65483
-0.48793	-2.88084		-0.48725	-3.3707		-0.54787	-6.33894			-0.48807	-4.15227		-0.48959	-7.67818		-0.4845	-8.65379
-0.48793	-2.8798		-0.48644	-3.37135		-0.54745	-6.34369			-0.48807	-4.15072		-0.48926	-7.67659		-0.48446	-8.65534
-0.48723	-2.87881		-0.48623	-3.37108		-0.54702	-6.34757			-0.48765	-4.14919		-0.48892	-7.67552		-0.48446	-8.65778
-0.48707	-2.87794		-0.48603	-3.36801		-0.54983	-6.34877			-0.48755	-4.14742		-0.48878	-7.6753		-0.4554	-8.63267
-0.48692	-2.87653		-0.48582	-3.36424		-0.54983	-6.35589			-0.48745	-4.14709		-0.48878	-7.67411		-0.45496	-8.6323
-0.45729	-2.82092		-0.45673	-3.32369		-0.52339	-6.32676			-0.45786	-4.05001		-0.45945	-7.64421		-0.45496	-8.63145
-0.45706	-2.81873		-0.45645	-3.32282		-0.52213	-6.33399			-0.45773	-4.0488		-0.45904	-7.64247		-0.45496	-8.63099
-0.45683	-2.81528		-0.45616	-3.32046		-0.52185	-6.34346			-0.4576	-4.04855		-0.45895	-7.64095		-0.45496	-8.62934
-0.45836	-2.81213		-0.45588	-3.32444		-0.52158	-6.35503			-0.45747	-4.04825		-0.45895	-7.64024		-0.42553	-8.61284
-0.45836	-2.80964		-0.45796	-3.33038		-0.52339	-6.35735			-0.45843	-4.04741		-0.45895	-7.64071		-0.42553	-8.60839
-0.42765	-2.74366		-0.42703	-3.31427		-0.49763	-6.3648			-0.42822	-3.94313		-0.42953	-7.60847		-0.42553	-8.60379
-0.42735	-2.74235		-0.42673	-3.31605		-0.49763	-6.36388			-0.42788	-3.94092		-0.42932	-7.60864		-0.42553	-8.59998
-0.42735	-2.74126		-0.42643	-3.32166		-0.49763	-6.36042			-0.42755	-3.93986		-0.42932	-7.60792		-0.42517	-8.59745
-0.42735	-2.73974		-0.42637	-3.32659		-0.49682	-6.35679			-0.42751	-3.93847		-0.42932	-7.60689		-0.39605	-8.56328
-0.42735	-2.7384		-0.42637	-3.32674		-0.49665	-6.35338			-0.42751	-3.93821		-0.42932	-7.60568		-0.39605	-8.56243
-0.39774	-2.65199		-0.39721	-3.28601		-0.47268	-6.3476			-0.39841	-3.82123		-0.39951	-7.56933		-0.39605	-8.56335
-0.39774	-2.65131		-0.39683	-3.29614		-0.47224	-6.34165			-0.39804	-3.8176		-0.39951	-7.56889		-0.39605	-8.56646
-0.39774	-2.65135		-0.39673	-3.30078		-0.47224	-6.33603			-0.39804	-3.81539		-0.39951	-7.56723		-0.39553	-8.57084
-0.39774	-2.65164		-0.39673	-3.30002		-0.47224	-6.33215			-0.39804	-3.81419		-0.39951	-7.56595		-0.36635	-8.51239
-0.39739	-2.65236		-0.39673	-3.29517		-0.47224	-6.33712			-0.39804	-3.8131		-0.39912	-7.56583		-0.36588	-8.50473
-0.36797	-2.56083		-0.3669	-3.32155		-0.44849	-6.36609			-0.36811	-3.68798		-0.36945	-7.52248		-0.36577	-8.49937
-0.36797	-2.56109		-0.3668	-3.31703		-0.44798	-6.37008			-0.36798	-3.68558		-0.36945	-7.52041		-0.36566	-8.50002
-0.36758	-2.56078		-0.3668	-3.31165		-0.44747	-6.36855			-0.36798	-3.68411		-0.36945	-7.51912		-0.36555	-8.50176
-0.36748	-2.55977		-0.3668	-3.30718		-0.44725	-6.36363			-0.36798	-3.68333		-0.3692	-7.51938		-0.33683	-8.41119
-0.36738	-2.55856		-0.3668	-3.30176		-0.44725	-6.35522			-0.36798	-3.68177		-0.36914	-7.51959		-0.33659	-8.4125
-0.3388	-2.45133		-0.33727	-3.28128		-0.42333	-6.33508			-0.33881	-3.54005		-0.34006	-7.4718		-0.33635	-8.41468
-0.3388	-2.44995		-0.33727	-3.28158		-0.42304	-6.33567			-0.33881	-3.53659		-0.34006	-7.4698		-0.33612	-8.41787
-0.33811	-2.44908		-0.33727	-3.27343		-0.42275	-6.3402			-0.33881	-3.53428		-0.33947	-7.4682		-0.33698	-8.41564
-0.33797	-2.44823		-0.33703	-3.26295		-0.42246	-6.34684			-0.33881	-3.53294		-0.33934	-7.46798		-0.30715	-8.3444
-0.33783	-2.44828		-0.33697	-3.25366		-0.42451	-6.35117			-0.33832	-3.53153		-0.33921	-7.46774		-0.30684	-8.34405
-0.30978	-2.33951		-0.30787	-3.22235		-0.39872	-6.31226			-0.30904	-3.37165		-0.30981	-7.41214		-0.30653	-8.34223
-0.30876	-2.33769		-0.30787	-3.22126		-0.39872	-6.31659			-0.30904	-3.3684		-0.30963	-7.41248		-0.30648	-8.34049
-0.30856	-2.33687		-0.3075	-3.22489		-0.39801	-6.31804			-0.30904	-3.36569		-0.30945	-7.41203		-0.30648	-8.34148
-0.30835	-2.33649		-0.30741	-3.23172		-0.39783	-6.32115			-0.30858	-3.36335		-0.30926	-7.4108		-0.27685	-8.27496
-0.30978	-2.33514		-0.30733	-3.2399		-0.39766	-6.32427			-0.30848	-3.36193		-0.31059	-7.40921		-0.27673	-8.27457
-0.27898	-2.21294		-0.27876	-3.18759		-0.37333	-6.30754			-0.27938	-3.17821		-0.2801	-7.339		-0.27673	-8.27159
-0.27871	-2.21097		-0.27799	-3.19009		-0.37333	-6.30656			-0.27865	-3.17551		-0.2798	-7.33688		-0.27673	-8.26906
-0.27844	-2.20906		-0.27782	-3.19726		-0.37333	-6.30506			-0.27851	-3.17377		-0.2795	-7.33536		-0.27673	-8.26361
-0.27831	-2.2076		-0.27764	-3.20786		-0.3728	-6.30628			-0.27836	-3.17274		-0.28158	-7.33442		-0.2476	-8.17368
-0.27831	-2.20587		-0.27747	-3.22108		-0.37267	-6.30553			-0.27938	-3.17117		-0.28158	-7.33327		-0.2476	-8.17483
-0.24888	-2.05994		-0.24785	-3.16645		-0.34853	-6.27751			-0.24941	-2.96986		-0.25011	-7.25071		-0.2476	-8.17586
-0.24859	-2.05686		-0.24754	-3.16392		-0.34792	-6.27313			-0.24919	-2.96565		-0.24974	-7.2492		-0.24709	-8.17696
-0.24859	-2.05548		-0.24725	-3.16045		-0.34792	-6.27176			-0.24896	-2.96264		-0.24964	-7.24824		-0.24697	-8.17627
-0.24859	-2.05481		-0.24725	-3.15801		-0.34792	-6.27109			-0.2505	-2.95985		-0.24964	-7.24748		-0.2181	-8.04901
-0.24859	-2.05467		-0.24725	-3.15673		-0.34792	-6.27595			-0.2505	-2.958		-0.24964	-7.24682		-0.2181	-8.04887
-0.2187	-1.89709		-0.21801	-3.12191		-0.32411	-6.2762			-0.2195	-2.73378		-0.21967	-7.14092		-0.21758	-8.04777
-0.2187	-1.89383		-0.21763	-3.1229		-0.32366	-6.27855			-0.21911	-2.7284		-0.21945	-7.13859		-0.21747	-8.04279
-0.2187	-1.8922		-0.21763	-3.12254		-0.32321	-6.27905			-0.21887	-2.72531		-0.21945	-7.13617		-0.21735	-8.04005
-0.2187	-1.89102		-0.21763	-3.11972		-0.32629	-6.27698			-0.21887	-2.72288		-0.21945	-7.13494		-0.18902	-7.8766
-0.21841	-1.89019		-0.21763	-3.1151		-0.32629	-6.27101			-0.21887	-2.72218		-0.21945	-7.13292		-0.18816	-7.87604
-0.18897	-1.71364		-0.1879	-3.06251		-0.29989	-6.24296			-0.18926	-2.46669		-0.18973	-6.99659		-0.18797	-7.87492
-0.18897	-1.71042		-0.1879	-3.06475		-0.29859	-6.23975			-0.18884	-2.46138		-0.18973	-6.99462		-0.18777	-7.87358
-0.18897	-1.70674		-0.1879	-3.06641		-0.29832	-6.23832			-0.18884	-2.45751		-0.18955	-6.99388		-0.18902	-7.87229
-0.18869	-1.70452		-0.1879	-3.06813		-0.29805	-6.23774			-0.18884	-2.45497		-0.1895	-6.99194		-0.15852	-7.64613
-0.18863	-1.70162		-0.18763	-3.06823		-0.29989	-6.23307			-0.18884	-2.4535		-0.18945	-6.99064		-0.1582	-7.64099
-0.1597	-1.501		-0.15851	-2.98848		-0.27443	-6.1974			-0.15932	-2.16722		-0.16072	-6.81227		-0.15787	-7.63611
-0.1597	-1.49605		-0.15851	-2.98708		-0.27443	-6.19243			-0.15923	-2.16067		-0.1599	-6.80841		-0.15773	-7.63318
-0.15896	-1.49269		-0.15851	-2.98754		-0.2736	-6.18972			-0.15923	-2.15629		-0.15969	-6.80427		-0.15773	-7.63262
-0.15881	-1.48998		-0.1582	-2.98872		-0.27342	-6.18788			-0.15923	-2.1533		-0.15949	-6.80161		-0.12846	-7.35068
-0.15865	-1.4882		-0.15813	-2.98891		-0.27324	-6.18492			-0.15923	-2.15095		-0.15928	-6.80076		-0.1283	-7.34318
-0.13033	-1.26574		-0.1291	-2.85537		-0.24929	-6.14584			-0.12959	-1.83094		-0.13073	-6.55353		-0.1283	-7.33693
-0.12953	-1.26122		-0.12851	-2.85691		-0.24929	-6.1464			-0.12959	-1.82409		-0.12995	-6.54621		-0.1283	-7.3352
-0.12935	-1.2577		-0.12838	-2.85727		-0.24929	-6.14483			-0.12959	-1.81838		-0.12979	-6.54105		-0.1283	-7.33454
-0.12918	-1.25472		-0.12824	-2.85624		-0.24866	-6.14265			-0.12959	-1.81452		-0.12963	-6.53744		-0.09853	-6.94778
-0.13033	-1.25303		-0.1291	-2.85413		-0.24853	-6.13916			-0.12907	-1.81226		-0.13073	-6.53542		-0.09853	-6.93941
-0.09945	-0.9987		-0.09865	-2.69177		-0.22417	-6.09589			-0.09956	-1.45276		-0.09979	-6.13211		-0.09853	-6.93529
-0.09918	-0.99422		-0.09836	-2.6903		-0.22417	-6.09377			-0.09956	-1.44707		-0.09955	-6.12524		-0.09805	-6.93295
-0.09893	-0.99071		-0.09808	-2.69063		-0.22417	-6.09402			-0.099	-1.44257		-0.09934	-6.12009		-0.09794	-6.93237
-0.09893	-0.98854		-0.09997	-2.68995		-0.22417	-6.09399			-0.09887	-1.43892		-0.09934	-6.11611		-0.08826	-6.75972
-0.09893	-0.98677		-0.09997	-2.68794		-0.22357	-6.09279			-0.09874	-1.43616		-0.09934	-6.11155		-0.08826	-6.7536
-0.08944	-0.89736		-0.08825	-2.59723		-0.19988	-6.00257			-0.08912	-1.30767		-0.08945	-5.9337		-0.08826	-6.7507
-0.08889	-0.89529		-0.08825	-2.59763		-0.1991	-6.00095			-0.08911	-1.30417		-0.08934	-5.92888		-0.08826	-6.7482
-0.08876	-0.89398		-0.0879	-2.59414		-0.19888	-5.99564			-0.08911	-1.30186		-0.08931	-5.92494		-0.08803	-6.7455
-0.08864	-0.89278		-0.08782	-2.59157		-0.19888	-5.99126			-0.08911	-1.30018		-0.08928	-5.92261		-0.07849	-6.55028
-0.08851	-0.89194		-0.08774	-2.59235		-0.19888	-5.99087			-0.08911	-1.29908		-0.08925	-5.92044		-0.07831	-6.54525
-0.0788	-0.79659		-0.07798	-2.50966		-0.17494	-5.89913			-0.07903	-1.16888		-0.07906	-5.7123		-0.0782	-6.54075
-0.0788	-0.79535		-0.07798	-2.50408		-0.17452	-5.89374			-0.0789	-1.16595		-0.07906	-5.70623		-0.0782	-6.53672
-0.07856	-0.79496		-0.07798	-2.49605		-0.1741	-5.88609			-0.07877	-1.1639		-0.07906	-5.70092		-0.0782	-6.53391
-0.07851	-0.79446		-0.0778	-2.48742		-0.17401	-5.88271			-0.07874	-1.16211		-0.07884	-5.69606		-0.06882	-6.32312
-0.07845	-0.79294		-0.07777	-2.48392		-0.17401	-5.88059			-0.07874	-1.16026		-0.07878	-5.69253		-0.06844	-6.31777
-0.0686	-0.70071		-0.06832	-2.40008		-0.14972	-5.75307			-0.06891	-1.02742		-0.06896	-5.43045		-0.06836	-6.31297
-0.0686	-0.69898		-0.06821	-2.39374		-0.14936	-5.74866			-0.06884	-1.02448		-0.06896	-5.42529		-0.06828	-6.30874
-0.0686	-0.69735		-0.06821	-2.39238		-0.149	-5.74455			-0.06876	-1.02201		-0.06896	-5.42152		-0.06882	-6.30347
-0.0686	-0.69561		-0.06821	-2.39261		-0.14864	-5.74318			-0.06869	-1.02037		-0.06896	-5.41882		-0.05855	-6.03442
-0.0686	-0.69445		-0.06821	-2.39414		-0.14993	-5.7476			-0.06922	-1.01905		-0.06896	-5.41685		-0.05855	-6.02738
-0.05912	-0.59942		-0.05832	-2.22134		-0.1254	-5.58645			-0.05897	-0.88262		-0.05927	-5.10791		-0.05855	-6.02021
-0.05899	-0.59659		-0.0582	-2.21858		-0.12455	-5.58134			-0.05897	-0.87996		-0.05917	-5.09956		-0.05833	-6.01358
-0.05887	-0.59461		-0.05815	-2.21799		-0.12435	-5.57598			-0.05885	-0.8778		-0.05907	-5.09348		-0.05828	-6.00925
-0.05887	-0.59374		-0.05815	-2.21857		-0.12415	-5.57215			-0.05883	-0.87654		-0.05907	-5.08911		-0.04812	-5.66431
-0.05887	-0.59307		-0.05815	-2.21803		-0.12395	-5.56737			-0.05881	-0.87567		-0.05907	-5.08445		-0.04812	-5.65637
-0.04946	-0.49487		-0.04859	-2.04897		-0.0997	-5.35237			-0.04873	-0.73826		-0.04964	-4.68508		-0.04812	-5.65099
-0.04885	-0.49264		-0.04818	-2.04177		-0.0997	-5.34458			-0.04873	-0.73512		-0.04904	-4.67359		-0.04812	-5.64595
-0.04871	-0.49103		-0.0481	-2.0353		-0.0997	-5.34154			-0.04873	-0.73246		-0.04891	-4.66448		-0.04814	-5.64183
-0.04857	-0.48963		-0.04802	-2.03082		-0.09894	-5.34103			-0.04873	-0.73048		-0.04878	-4.65771		-0.0382	-5.22047
-0.04843	-0.48871		-0.04859	-2.0287		-0.09879	-5.33321			-0.04874	-0.72874		-0.04964	-4.65279		-0.03793	-5.2067
-0.03893	-0.38674		-0.03805	-1.8057		-0.07415	-5.01165			-0.03862	-0.58233		-0.03869	-4.13094		-0.03793	-5.19545
-0.03893	-0.38477		-0.03805	-1.79869		-0.07415	-4.99933			-0.03858	-0.57889		-0.03869	-4.11556		-0.03793	-5.18665
-0.03862	-0.38317		-0.03765	-1.79196		-0.07415	-4.98905			-0.03858	-0.5758		-0.03869	-4.10311		-0.03793	-5.17942
-0.03854	-0.38177		-0.03757	-1.78718		-0.07415	-4.98226			-0.03858	-0.57324		-0.03838	-4.09402		-0.02854	-4.61405
-0.03847	-0.38083		-0.03748	-1.78433		-0.07381	-4.97721			-0.03858	-0.57161		-0.03832	-4.08691		-0.02841	-4.59825
-0.02865	-0.2857		-0.02842	-1.48757		-0.05003	-4.4952			-0.02909	-0.43374		-0.02915	-3.44853		-0.02829	-4.58438
-0.02865	-0.28287		-0.02842	-1.48089		-0.04929	-4.47045			-0.02895	-0.43044		-0.02903	-3.42744		-0.02829	-4.57382
-0.02865	-0.2803		-0.02842	-1.47547		-0.04918	-4.45045			-0.02886	-0.42826		-0.02903	-3.40992		-0.02829	-4.56482
-0.02865	-0.27795		-0.02792	-1.47096		-0.04918	-4.4357			-0.02886	-0.42605		-0.02903	-3.3967		-0.01859	-3.73496
-0.02841	-0.27663		-0.02782	-1.46783		-0.04918	-4.42595			-0.02886	-0.42488		-0.02903	-3.38641		-0.01846	-3.70794
-0.01884	-0.17769		-0.01796	-1.0741		-0.02502	-3.52525			-0.01906	-0.2796		-0.01878	-2.48798		-0.01833	-3.68787
-0.01873	-0.17479		-0.01796	-1.06357		-0.02449	-3.4807			-0.01894	-0.27629		-0.01856	-2.46432		-0.01917	-3.67225
-0.01873	-0.17279		-0.01796	-1.05433		-0.02396	-3.44531			-0.01882	-0.27358		-0.01851	-2.44548		-0.01917	-3.6599
-0.01873	-0.17118		-0.01796	-1.04595		-0.02385	-3.41989			-0.01961	-0.27157		-0.01851	-2.43073		-0.00946	-2.37443
-0.01873	-0.16962		-0.01779	-1.03823		-0.02385	-3.39874			-0.01961	-0.27003		-0.01851	-2.41877		-0.00877	-2.31979
-0.0092	-0.06907		-0.00837	-0.52992		0.00279	1.11846			-0.00914	-0.12722		-0.00918	-1.29591		-0.00861	-2.2734
-0.00901	-0.06658		-0.00837	-0.51325		0.00273	1.11741			-0.00904	-0.12396		-0.00904	-1.2587		-0.00845	-2.23588
-0.009	-0.06453		-0.00837	-0.50045		0.00268	1.11552			-0.00895	-0.12112		-0.00892	-1.22891		-0.00829	-2.20705
-0.009	-0.06355		-0.00837	-0.48993		0.00268	1.11299			-0.00963	-0.11791		-0.00892	-1.20416		0.000379683	0.43535
-0.009	-0.06232		-0.00801	-0.48236		0.00268	1.109			-0.00963	-0.11609		-0.00892	-1.18557		0.000379683	0.53606
0.000590558	0.03256		0.000956693	0.08929		0.02434	3.35204			0.000166483	0.02036		0.00054089	0.1567		0.000940021	0.61583
0.000763987	0.03498		0.00107	0.10802		0.02489	3.4086			0.000709404	0.02433		0.000689842	0.19797		0.00107	0.68124
0.000925102	0.03734		0.00107	0.12227		0.02545	3.45154			0.000823703	0.02726		0.000839093	0.2305		0.00121	0.73089
0.000925102	0.03955		0.00107	0.13442		0.02562	3.48402			0.000938003	0.03044		-0.00016913	0.2564		0.01111	2.94569
0.000925102	0.04112		0.00107	0.14414		0.02562	3.5067			0.000166483	0.03307		-0.00016913	0.27723		0.01126	2.98639
0.01117	0.14804		0.01061	0.71941		0.04964	4.42419			0.01117	0.18903		0.01046	1.64121		0.0114	3.0175
0.01117	0.15061		0.01061	0.7326		0.05014	4.45014			0.01135	0.19228		0.01062	1.67117		0.01155	3.04297
0.01117	0.1528		0.01061	0.74383		0.05064	4.46807			0.01135	0.19479		0.01062	1.69482		0.01051	3.06298
0.01117	0.15473		0.01105	0.75363		0.05079	4.48271			0.01135	0.19726		0.01062	1.71406		0.02112	4.12698
0.01142	0.15625		0.01114	0.76195		0.05079	4.49313			0.01135	0.19918		0.01062	1.72914		0.02121	4.14874
0.02079	0.25399		0.02063	1.22068		0.07422	4.99894			0.02098	0.34334		0.02067	2.78636		0.0213	4.16766
0.02079	0.25692		0.02063	1.23322		0.07598	5.01056			0.02107	0.34762		0.02087	2.80886		0.0214	4.18337
0.02079	0.25898		0.02063	1.24147		0.07633	5.01891			0.02107	0.35071		0.02087	2.82659		0.02073	4.19421
0.02132	0.26062		0.02119	1.24722		0.07668	5.02411			0.02107	0.35309		0.02087	2.84094		0.03072	4.89173
0.02145	0.26239		0.02131	1.25343		0.07422	5.03061			0.02107	0.35424		0.02087	2.85291		0.03127	4.90709
0.03117	0.36314		0.03102	1.61365		0.10022	5.35332			0.0313	0.49815		0.03061	3.6543		0.03138	4.91887
0.03117	0.36564		0.03102	1.62268		0.10022	5.36374			0.03143	0.50164		0.03083	3.67041		0.0315	4.92876
0.03117	0.36799		0.03102	1.6287		0.10128	5.37123			0.03143	0.50456		0.03083	3.6838		0.03072	4.9388
0.0314	0.37004		0.03117	1.63177		0.10149	5.3752			0.03143	0.50723		0.03083	3.69503		0.04064	5.43538
0.03145	0.37103		0.03121	1.63385		0.1017	5.38025			0.03143	0.50896		0.03083	3.70389		0.04064	5.4464
0.04093	0.46549		0.04076	1.88825		0.12596	5.59601			0.04101	0.64977		0.04041	4.30215		0.04108	5.45656
0.04112	0.46841		0.04077	1.89633		0.12596	5.60293			0.04118	0.65377		0.04057	4.31497		0.04117	5.46461
0.04112	0.47096		0.04077	1.90466		0.12596	5.60718			0.04118	0.65663		0.04072	4.32452		0.04127	5.47112
0.04112	0.47303		0.04077	1.9134		0.1266	5.61092			0.04118	0.65856		0.04074	4.33238		0.05134	5.8638
0.04112	0.47443		0.04077	1.92141		0.12673	5.61453			0.04118	0.65949		0.04074	4.33862		0.05134	5.87365
0.05139	0.5771		0.05148	2.11852		0.15045	5.69511			0.05142	0.80207		0.05104	4.82709		0.05134	5.88222
0.05151	0.57935		0.05169	2.12473		0.15045	5.73547			0.05156	0.80614		0.05119	4.83589		0.05168	5.88901
0.05161	0.58145		0.05171	2.13144		0.15045	5.75506			0.0517	0.80935		0.05134	4.8425		0.05175	5.89426
0.05161	0.58347		0.05171	2.13705		0.15045	5.76522			0.05183	0.81205		0.05149	4.84795		0.0619	6.20993
0.05161	0.58444		0.05171	2.14032		0.15135	5.76824			0.05134	0.81458		0.0504	4.85294		0.0619	6.21581
0.06119	0.68175		0.06161	2.30631		0.1758	5.90162			0.06162	0.95628		0.06136	5.22729		0.0619	6.21946
0.06159	0.68421		0.06175	2.30772		0.17603	5.90478			0.0618	0.95938		0.06136	5.23383		0.0619	6.22449
0.06168	0.68673		0.06188	2.30585		0.17603	5.9095			0.06184	0.96151		0.06155	5.23855		0.06193	6.22658
0.06177	0.68806		0.06191	2.3038		0.17603	5.92022			0.06188	0.96334		0.06159	5.24298		0.07148	6.47241
0.06119	0.6896		0.06191	2.3046		0.17603	5.92073			0.06192	0.96467		0.06163	5.24586		0.07158	6.47593
0.07177	0.78333		0.07143	2.44143		0.2006	6.01628			0.07182	1.09815		0.07137	5.52744		0.07158	6.4801
0.07177	0.78586		0.07152	2.44839		0.20125	6.03036			0.07182	1.10051		0.07137	5.53385		0.07158	6.48473
0.07177	0.78729		0.07161	2.45441		0.20125	6.03609			0.07211	1.10298		0.07137	5.5387		0.07158	6.48853
0.07195	0.78829		0.07171	2.45767		0.20125	6.03374			0.07217	1.10498		0.07137	5.54309		0.08144	6.69914
0.07199	0.78927		0.07104	2.45635		0.20125	6.02813			0.07224	1.10658		0.07161	5.54635		0.0816	6.70354
0.08194	0.87901		0.08128	2.52013		0.22522	6.09844			0.08177	1.23562		0.08137	5.78485		0.08167	6.70511
0.08194	0.8812		0.08128	2.52697		0.22572	6.10726			0.08177	1.23881		0.08143	5.78912		0.08167	6.70813
0.08194	0.88231		0.08128	2.53045		0.22623	6.11022			0.08177	1.24154		0.08143	5.79223		0.08167	6.71115
0.08194	0.88305		0.08161	2.53162		0.22638	6.10913			0.08177	1.24345		0.08143	5.79482		0.09158	6.893
0.08205	0.88378		0.08168	2.53095		0.22638	6.10497			0.08206	1.24463		0.08143	5.79741		0.09173	6.89815
0.09173	0.97711		0.09171	2.63872		0.24993	6.15846			0.09157	1.37087		0.09139	5.99329		0.09189	6.90092
0.09184	0.97868		0.09171	2.6341		0.25023	6.15654			0.09177	1.37403		0.09157	5.99806		0.09192	6.90394
0.09184	0.97977		0.09171	2.63124		0.25053	6.15335			0.09182	1.37644		0.09175	6.0015		0.09192	6.90677
0.09184	0.9807		0.09171	2.63146		0.25082	6.15112			0.09182	1.37847		0.09182	6.00427		0.10167	7.05995
0.09184	0.98086		0.09172	2.6362		0.24873	6.12466			0.09182	1.37963		0.09182	6.00658		0.10177	7.06558
0.10167	1.07338		0.1005	2.67004		0.27374	6.18316			0.10174	1.50146		0.10147	6.17179		0.10188	7.06887
0.10167	1.0725		0.10072	2.67397		0.2751	6.18506			0.10183	1.50467		0.10154	6.17365		0.10198	7.06976
0.10188	1.07223		0.10072	2.68408		0.27542	6.18561			0.10193	1.50713		0.10161	6.17706		0.10126	7.07044
0.10193	1.07226		0.10072	2.69515		0.27573	6.18302			0.10202	1.50915		0.10167	6.17883		0.10186	7.06913
0.10198	1.07243		0.10072	2.70309		0.27605	6.18081			0.10135	1.51078		0.10119	6.17982		0.10186	7.0711
0.13132	1.31897		0.10139	2.71512		0.29919	6.2295			0.1022	1.51589		0.10182	6.18464		0.10189	7.07215
0.13149	1.32205		0.10143	2.72169		0.29919	6.22592			0.1022	1.5153		0.10182	6.18461		0.1019	7.07405
0.13166	1.3246		0.10146	2.72545		0.3003	6.22271			0.10219	1.51514		0.10187	6.18509		0.1019	7.07417
0.13183	1.3263		0.10147	2.72404		0.30057	6.21978			0.10218	1.51564		0.10189	6.18556		0.13067	7.44037
0.13122	1.32707		0.10147	2.71757		0.30084	6.21573			0.10218	1.51569		0.1019	6.18541		0.13092	7.44644
0.16127	1.55074		0.13095	2.86329		0.32477	6.2617			0.1303	1.85304		0.13139	6.54577		0.13117	7.45005
0.16166	1.55398		0.131	2.85754		0.32477	6.26589			0.13149	1.85968		0.13161	6.55076		0.12942	7.45246
0.16168	1.55748		0.131	2.85285		0.32477	6.26874			0.13174	1.86489		0.13184	6.55392		0.12942	7.45393
0.16168	1.55986		0.131	2.85069		0.32545	6.26665			0.13199	1.86881		0.13041	6.55583		0.16043	7.71545
0.16168	1.56213		0.131	2.84943		0.32561	6.26425			0.1303	1.8717		0.13041	6.55714		0.16061	7.71539
0.18948	1.73974		0.15921	2.97702		0.34923	6.44173			0.16095	2.17688		0.16082	6.80127		0.16061	7.71784
0.19012	1.74665		0.16009	2.98371		0.34923	6.35953			0.16128	2.18747		0.1612	6.8055		0.16061	7.71815
0.19075	1.75208		0.16028	2.98857		0.34923	6.32503			0.16158	2.19409		0.16159	6.80911		0.16061	7.7193
0.19084	1.7558		0.16028	2.99351		0.34923	6.29897			0.16158	2.19808		0.16165	6.81067		0.18994	7.93277
0.19084	1.75742		0.16028	2.9954		0.34991	6.2888			0.16158	2.20061		0.16165	6.81205		0.18994	7.93457
0.22085	1.94455		0.19036	3.06194		0.37453	6.29123			0.19086	2.48587		0.19123	6.99861		0.18994	7.93562
0.22108	1.94818		0.19036	3.06345		0.3749	6.29254			0.19086	2.48851		0.19123	6.99706		0.19058	7.93705
0.22108	1.95082		0.19036	3.06734		0.3749	6.29226			0.19086	2.49098		0.19123	6.99679		0.19071	7.94012
0.22108	1.95299		0.19036	3.07196		0.3749	6.29251			0.19086	2.49388		0.19123	6.99702		0.21931	8.10223
0.22108	1.95392		0.19066	3.07437		0.3749	6.29274			0.19126	2.49595		0.19141	6.99832		0.22001	8.10281
0.25048	2.11299		0.2199	3.10928		0.39901	6.33872			0.22078	2.75243		0.22092	7.13253		0.22015	8.1037
0.25048	2.11461		0.2199	3.1101		0.39951	6.34545			0.22078	2.75526		0.22092	7.13406		0.22029	8.10398
0.25048	2.11576		0.22049	3.10711		0.39983	6.35047			0.22135	2.75697		0.22131	7.13445		0.21931	8.10606
0.25112	2.11468		0.22062	3.10326		0.39983	6.35193			0.22148	2.75798		0.2214	7.13529		0.24958	8.23281
0.25125	2.11391		0.22076	3.10019		0.39983	6.34679			0.2216	2.75885		0.22148	7.13579		0.24994	8.23171
0.28003	2.25444		0.24859	3.19712		0.42402	6.33813			0.24992	2.97925		0.25077	7.23777		0.25013	8.23318
0.28074	2.25655		0.24958	3.1963		0.4244	6.34469			0.25084	2.98413		0.25095	7.23891		0.25013	8.237
0.28089	2.25853		0.24981	3.18858		0.42479	6.3498			0.25106	2.98698		0.25114	7.2402		0.25013	8.23972
0.28104	2.2609		0.25003	3.18185		0.4249	6.34902			0.25128	2.98922		0.25132	7.24115		0.27971	8.33866
0.28003	2.26164		0.25025	3.1794		0.4249	6.34349			0.2515	2.99057		0.25001	7.24185		0.27974	8.33941
0.30853	2.38517		0.27941	3.21414		0.44888	6.33927			0.28072	3.19375		0.28093	7.33136		0.27974	8.34082
0.30853	2.38427		0.27974	3.21149		0.4493	6.33785			0.28104	3.19602		0.28123	7.33202		0.27974	8.33923
0.30992	2.38469		0.28007	3.20845		0.44971	6.33628			0.28135	3.1975		0.28136	7.33218		0.28013	8.34316
0.31022	2.38536		0.28019	3.2056		0.45013	6.33556			0.28144	3.19919		0.28136	7.33155		0.30835	8.46792
0.31053	2.3858		0.28019	3.20222		0.44712	6.33791			0.28144	3.20054		0.28136	7.33185		0.30835	8.45176
0.33942	2.49944		0.30924	3.22069		0.47309	6.3264			0.31064	3.38249		0.31111	7.40352		0.30835	8.44377
0.34014	2.50209		0.3097	3.2274		0.47431	6.34522			0.31083	3.3851		0.31111	7.40492		0.30915	8.44033
0.34029	2.50166		0.30979	3.23285		0.47458	6.35539			0.31083	3.38669		0.31111	7.40489		0.30932	8.44007
0.34043	2.50086		0.30979	3.2364		0.47486	6.35816			0.31083	3.38725		0.31111	7.40476		0.33807	8.50124
0.33942	2.50086		0.30979	3.23706		0.47513	6.35966			0.31083	3.38681		0.3115	7.40489		0.33885	8.50342
0.36987	2.6005		0.33912	3.25666		0.49821	6.34631			0.34088	3.54808		0.34077	7.46512		0.33901	8.50297
0.37019	2.60018		0.33912	3.25365		0.49821	6.34659			0.34088	3.55009		0.34077	7.46679		0.33917	8.50265
0.37041	2.59983		0.33912	3.25045		0.49912	6.34372			0.34088	3.55078		0.34141	7.46748		0.33807	8.5023
0.37041	2.59994		0.33912	3.24749		0.49933	6.34045			0.3411	3.5511		0.34155	7.4678		0.36829	8.56393
0.37041	2.60065		0.33955	3.24571		0.49954	6.33726			0.34115	3.55041		0.3417	7.46786		0.36865	8.56551
0.40001	2.69823		0.36803	3.28438		0.52346	6.34715			0.36954	3.69409		0.37049	7.51785		0.3688	8.56634
0.40034	2.70128		0.36803	3.28768		0.52346	6.34508			0.37057	3.69687		0.37132	7.51874		0.3688	8.56625
0.40034	2.70391		0.36803	3.2924		0.52346	6.34115			0.37079	3.69916		0.37149	7.51936		0.3688	8.56681
0.40034	2.70543		0.36857	3.29813		0.52346	6.34047			0.371	3.70049		0.37165	7.51923		0.39822	8.61026
0.40034	2.70586		0.36869	3.30377		0.52435	6.34109			0.36954	3.70226		0.37049	7.51898		0.39822	8.61237
0.43004	2.78251		0.39788	3.30055		0.54828	6.3724			0.39953	3.82871		0.40083	7.56211		0.39822	8.61216
0.43004	2.78362		0.39844	3.30309		0.54895	6.37031			0.39981	3.82938		0.40119	7.56368		0.39822	8.61066
0.43004	2.78457		0.39857	3.30337		0.54905	6.36506			0.40009	3.82933		0.4014	7.56382		0.39868	8.60832
0.43049	2.78428		0.39869	3.30253		0.54905	6.36251			0.40017	3.82951		0.4014	7.56435		0.42759	8.64866
0.43059	2.78333		0.39788	3.29577		0.54905	6.35922			0.40017	3.83023		0.4014	7.56503		0.42759	8.64759
0.45912	2.85394		0.4282	3.32408		0.57334	6.36316			0.43015	3.94896		0.43137	7.6042		0.42815	8.64887
0.45969	2.85395		0.42849	3.31849		0.5739	6.36299			0.43034	3.95077		0.43137	7.60508		0.42828	8.65042
0.45982	2.85465		0.42877	3.31375		0.57442	6.36324			0.43034	3.95171		0.43137	7.60509		0.4284	8.65056
0.45994	2.8556		0.42877	3.30818		0.57442	6.36218			0.43034	3.95221		0.43137	7.60545		0.45767	8.70771
0.46007	2.85655		0.42877	3.304		0.57442	6.36422			0.43034	3.95173		0.43156	7.60568		0.45791	8.70984
0.48971	2.92382		0.45843	3.33331		0.5981	6.36064			0.4599	4.0593		0.46042	7.63709		0.45815	8.71056
0.49	2.92272		0.45843	3.33176		0.59856	6.36196			0.4599	4.05952		0.46042	7.63755		0.45657	8.71038
0.49029	2.92244		0.45843	3.32569		0.59901	6.36408			0.4599	4.05982		0.46075	7.63752		0.45657	8.71227
0.49033	2.92247		0.45843	3.31785		0.59608	6.3681			0.4603	4.05986		0.46083	7.63767		0.48769	8.74035
0.49033	2.9231		0.45861	3.31132		0.59608	6.37201			0.46039	4.05975		0.46091	7.63779		0.48804	8.74326
0.51966	2.98334		0.48795	3.33523		0.62136	6.33832			0.48911	4.15221		0.49063	7.66861		0.48804	8.74358
0.52001	2.98383		0.48795	3.34126		0.62322	6.33718			0.48911	4.15377		0.49076	7.66798		0.48804	8.74389
0.52001	2.98448		0.48795	3.34816		0.62363	6.33704			0.48985	4.15511		0.4909	7.66765		0.48804	8.74166
0.52001	2.98495		0.48795	3.35812		0.62405	6.33531			0.49002	4.15661		0.49002	7.66802		0.5174	8.75054
0.52001	2.98525		0.48828	3.36667		0.62136	6.335			0.49019	4.15737		0.49002	7.66802		0.5174	8.74592
0.54788	3.02817		0.5172	3.36882		0.64694	6.29813			0.51977	4.24274		0.5207	7.69777		0.5174	8.74155
0.54871	3.03059		0.5172	3.3726		0.64694	6.29584			0.51995	4.24344		0.52107	7.69864		0.5174	8.74166
0.54939	3.03287		0.51774	3.37294		0.64832	6.29679			0.52012	4.24427		0.52107	7.6992		0.51757	8.74682
0.54939	3.03569		0.51785	3.37097		0.64863	6.30218			0.5203	4.24449		0.52107	7.69894		0.54557	8.75546
0.54939	3.03742		0.51796	3.3709		0.64895	6.30184			0.51903	4.2456		0.52107	7.69845		0.54557	8.76455
0.57924	3.08655		0.54521	3.37227		0.67335	6.30947			0.5495	4.3216		0.55076	7.72552		0.54632	8.76773
0.57924	3.08677		0.54667	3.37446		0.67335	6.31553			0.54987	4.32331		0.55076	7.7267		0.5465	8.76689
0.57924	3.08813		0.54696	3.38132		0.67335	6.32198			0.55005	4.32515		0.55076	7.72635		0.54668	8.76632
0.57924	3.08983		0.54726	3.38718		0.67403	6.32872			0.55005	4.32573		0.55099	7.72606		0.57556	8.80293
0.57967	3.09035		0.54521	3.38415		0.6742	6.33617			0.55005	4.32511		0.55105	7.72483		0.57628	8.80023
0.60879	3.14277		0.57687	3.38237		0.69864	6.37134			0.57995	4.39719		0.58052	7.75167		0.57643	8.79201
0.60879	3.14439		0.5771	3.38595		0.69864	6.36779			0.57995	4.39858		0.58052	7.75026		0.57658	8.78492
0.60941	3.14437		0.57727	3.38804		0.69864	6.36737			0.57995	4.40069		0.5811	7.74952		0.57556	8.78058
0.60956	3.14327		0.57727	3.39092		0.69864	6.36542			0.57995	4.40163		0.58122	7.7498		0.60621	8.81766
0.60971	3.14214		0.57727	3.39258		0.69911	6.36053			0.57999	4.4018		0.58133	7.74924		0.6066	8.81976
0.63803	3.1756		0.60682	3.4241		0.72286	6.36374			0.60941	4.46488		0.61071	7.77282		0.60676	8.8207
0.63885	3.17709		0.60729	3.41485		0.72331	6.3626			0.60941	4.46981		0.61099	7.7722		0.60676	8.82127
0.63905	3.17792		0.60729	3.40366		0.72331	6.36059			0.60941	4.47343		0.61126	7.77111		0.60676	8.82101
0.63924	3.17841		0.60729	3.39498		0.72331	6.36089			0.60987	4.47463		0.60938	7.77086		0.63614	8.83764
0.63944	3.17884		0.60729	3.39084		0.72331	6.3607			0.60998	4.47471		0.60938	7.77188		0.63614	8.83606
0.66842	3.22214		0.63653	3.41017		0.74694	6.31771			0.63905	4.5351		0.64108	7.80079		0.63614	8.83143
0.66874	3.22291		0.63653	3.4104		0.74753	6.32151			0.63965	4.53465		0.64139	7.80044		0.63614	8.82461
0.66906	3.22307		0.63653	3.41059		0.74792	6.3193			0.6398	4.53359		0.64139	7.79997		0.63678	8.81538
0.66703	3.22292		0.63653	3.4101		0.74792	6.31095			0.63994	4.53304		0.64139	7.80014		0.6658	8.8112
0.66703	3.2223		0.6368	3.40868		0.74792	6.30492			0.64009	4.53308		0.64139	7.80017		0.6658	8.8199
0.69898	3.25083		0.666	3.4057		0.77168	6.30687			0.66913	4.59455		0.67114	7.81894		0.66688	8.82647
0.69948	3.25128		0.666	3.40109		0.7721	6.30402			0.66944	4.59476		0.67114	7.81983		0.6671	8.83225
0.69948	3.25183		0.666	3.40131		0.77252	6.29807			0.66975	4.59479		0.67114	7.81902		0.66732	8.83911
0.69948	3.2526		0.66642	3.40531		0.76969	6.29651			0.66988	4.59375		0.67114	7.81726		0.69602	8.84703
0.69948	3.25499		0.66651	3.40895		0.76969	6.30022			0.66988	4.59347		0.67134	7.81627		0.69622	8.84412
0.72904	3.2929		0.6955	3.42681		0.795	6.28075			0.69955	4.63852		0.70063	7.83382		0.69642	8.84325
0.72904	3.29476		0.69606	3.4262		0.79663	6.29372			0.69978	4.63737		0.70063	7.83389		0.6965	8.84396
0.72904	3.29613		0.69619	3.42767		0.79697	6.30011			0.69978	4.64238		0.70119	7.83432		0.6965	8.84422
0.72928	3.29624		0.69632	3.4297		0.79732	6.29196			0.69978	4.64482		0.70133	7.83338		0.72556	8.85857
0.72933	3.29561		0.69644	3.43076		0.795	6.28402			0.69978	4.64422		0.70147	7.83256		0.7258	8.86241
0.75768	3.32318		0.72526	3.42646		0.82061	6.24232			0.729	4.69323		0.73035	7.84771		0.7258	8.86682
0.75831	3.32216		0.72557	3.4233		0.82061	6.24844			0.729	4.69372		0.73059	7.84803		0.7258	8.86752
0.75845	3.32141		0.72588	3.42374		0.8214	6.24989			0.729	4.69432		0.73083	7.84938		0.7258	8.8656
0.7586	3.32149		0.72386	3.42813		0.82158	6.25168			0.72931	4.69448		0.73107	7.85042		0.75512	8.87002
0.75875	3.32074		0.72386	3.43075		0.82175	6.24324			0.72939	4.69354		0.72931	7.85041		0.75512	8.86616
0.78764	3.34559		0.75496	3.4771		0.84547	6.21483			0.75797	4.72493		0.76026	7.86917		0.75512	8.86361
0.78792	3.34525		0.75567	3.46178		0.84547	6.21117			0.75911	4.73168		0.76064	7.86908		0.75559	8.86291
0.7882	3.34497		0.75567	3.45073		0.84547	6.20656			0.75936	4.73487		0.76089	7.86885		0.75569	8.86541
0.78833	3.34602		0.75567	3.44348		0.84635	6.20427			0.75961	4.73661		0.76089	7.8693		0.78386	8.88593
0.78833	3.34923		0.75567	3.43992		0.84654	6.20025			0.75797	4.73857		0.76089	7.86894		0.78471	8.88595
0.81738	3.37731		0.78534	3.46104		0.87012	6.25791			0.78869	4.7814		0.79003	7.88176		0.78489	8.88518
0.81762	3.37814		0.78534	3.46229		0.87012	6.24855			0.78897	4.78011		0.79033	7.88255		0.78508	8.88476
0.81762	3.37778		0.78534	3.46187		0.87012	6.24201			0.78925	4.77953		0.79033	7.88205		0.78386	8.88771
0.81762	3.37834		0.78561	3.46059		0.87012	6.24112			0.78927	4.77952		0.79033	7.8832		0.8137	8.87853
0.81762	3.37939		0.78567	3.45877		0.87081	6.2438			0.78927	4.77925		0.79033	7.88427		0.81403	8.87801
0.84671	3.40349		0.81395	3.44792		0.89395	6.16031			0.818	4.82043		0.81958	7.8952		0.81434	8.87808
0.84671	3.40306		0.81435	3.4523		0.89459	6.16832			0.818	4.82182		0.81958	7.89591		0.81434	8.87696
0.84671	3.40272		0.81445	3.45652		0.89459	6.17701			0.818	4.82283		0.81958	7.89711		0.81434	8.87532
0.84714	3.40272		0.81455	3.45731		0.89459	6.18221			0.818	4.82269		0.82013	7.89702		0.84322	8.88798
0.84724	3.40191		0.81465	3.45638		0.89459	6.18243			0.81832	4.82229		0.82025	7.89694		0.84322	8.8944
0.87552	3.42685		0.84301	3.44705		0.91707	6.18053			0.8472	4.85874		0.8488	7.90985		0.84322	8.89586
0.87556	3.42573		0.84328	3.4508		0.91758	6.17757			0.8472	4.8583		0.8494	7.90979		0.84322	8.89539
0.87556	3.42386		0.84356	3.45327		0.9181	6.17863			0.84766	4.85711		0.84955	7.91032		0.84322	8.89431
0.87556	3.42251		0.84384	3.45396		0.91468	6.1812			0.84777	4.8568		0.84969	7.91203		0.87114	8.91794
0.87611	3.42099		0.84285	3.45491		0.91468	6.1812			0.84788	4.85573		0.84983	7.91268		0.87189	8.91792
0.90414	3.44165		0.87216	3.46374		0.94067	6.11316			0.87526	4.88426		0.87839	7.92164		0.87189	8.91499
0.90414	3.44241		0.87253	3.45846		0.94067	6.10656			0.87526	4.88705		0.87866	7.92183		0.87189	8.91454
0.90462	3.44293		0.87291	3.45657		0.94199	6.1007			0.87526	4.88834		0.87894	7.92253		0.87189	8.91328
0.90474	3.44387		0.87299	3.45786		0.94228	6.09966			0.8763	4.88898		0.87899	7.92323		0.90049	8.92365
0.90485	3.44531		0.87299	3.45722		0.94257	6.11028			0.87654	4.89027		0.87899	7.92241		0.90049	8.92499
0.93314	3.46726		0.90151	3.4659		0.96489	6.11483			0.90465	4.92368		0.90721	7.93008		0.90049	8.92284
0.93337	3.46737		0.90151	3.47187		0.96489	6.11053			0.90465	4.9241		0.90732	7.93026		0.90106	8.91675
0.9336	3.46742		0.90151	3.47651		0.96489	6.10486			0.9055	4.92468		0.90732	7.92977		0.9012	8.91051
0.93383	3.46747		0.90151	3.47772		0.96587	6.10291			0.90567	4.9251		0.90732	7.92903		0.92886	8.89333
0.93217	3.46661		0.90155	3.47695		0.96608	6.10721			0.90585	4.92623		0.90732	7.92929		0.92933	8.89288
0.9618	3.4794		0.92933	3.46212		0.99592	6.06908			0.93363	4.95376		0.93622	7.93453		0.92944	8.8949
0.96219	3.48052		0.92933	3.45999		0.99592	6.07416			0.93394	4.95294		0.93622	7.93545		0.92956	8.89613
0.96232	3.48218		0.93002	3.46082		0.99592	6.07941			0.93425	4.95311		0.93622	7.93564		0.92966	8.90075
0.96232	3.48394		0.93019	3.46331		0.99592	6.08679			0.93433	4.95323		0.93638	7.93459		0.95726	8.89675
0.96232	3.48468		0.93036	3.46526		0.99753	6.08919			0.93433	4.95394		0.93642	7.93498		0.95751	8.90342
0.99875	3.50308		0.95777	3.47395						0.96222	4.98721		0.96377	7.93647		0.95776	8.90867
0.99875	3.5038		0.95794	3.47618						0.9625	4.98755		0.96467	7.93573		0.95778	8.90995
0.99875	3.50448		0.95811	3.47981						0.9625	4.98726		0.96486	7.93594		0.95778	8.90859
0.99875	3.50553		0.95828	3.4848						0.9625	4.98659		0.96506	7.93555		0.99069	8.89625
0.99933	3.5055		0.95704	3.48646						0.9625	4.9847		0.96525	7.93542		0.99069	8.89384
			0.99036	3.47576						0.9991	5.00921		1.00204	7.94391		0.99069	8.89438
			0.99112	3.47474						0.9991	5.01025		1.00235	7.94291		0.99069	8.8974
			0.99187	3.47362						0.9991	5.01116		1.00259	7.94247		0.99069	8.89688
			0.99207	3.47323						0.99974	5.01149		1.00259	7.94306		1.09304	8.89115
			0.99207	3.47598						0.99988	5.01182		1.00259	7.94168

## Sheet: nitrogen
6 nm			9 nm			15 nm				6 nm			9 nm			15 nm
C2 N2			C3 N2			C4 N2				FC2 N2			FC3 N2			FC4 N2
0.99927	4.10636		0.99647	7.44149		0.99549	3.7514			0.99223	4.30506		0.98814	7.46155		0.99053	2.76822
0.99927	4.10499		0.99647	7.44138		0.99594	3.75106			0.99314	4.30596		0.98814	7.46088		0.99135	2.76725
0.99927	4.09942		0.99743	7.44195		0.99639	3.75119			0.99223	4.30719		0.98894	7.46069		0.99192	2.76632
1.00007	4.09352		0.99766	7.44202		0.99683	3.75166			0.99351	4.3083		0.98913	7.46113		0.99192	2.766
1.00025	4.08657		0.99789	7.43984		0.99349	3.75142			0.99223	4.30702		0.98931	7.46006		0.99192	2.76598
0.96332	4.05885		0.96148	7.42417		0.9614	3.75323			0.95873	4.28406		0.95768	7.45209		0.95855	2.75573
0.96298	4.05967		0.96134	7.42462		0.96121	3.75348			0.95873	4.28484		0.9576	7.45174		0.95855	2.757
0.9629	4.05971		0.96119	7.42227		0.96113	3.75411			0.95905	4.28595		0.95753	7.45243		0.95855	2.75739
0.96282	4.05936		0.96104	7.4185		0.96113	3.75445			0.95873	4.28477		0.95746	7.4531		0.95855	2.7569
0.96275	4.06058		0.96209	7.4162		0.96113	3.75618			0.95879	4.28548		0.95801	7.45161		0.95848	2.75567
0.93462	4.06795		0.93303	7.39872		0.93281	3.74811			0.93032	4.26418		0.9292	7.44444		0.93069	2.75299
0.9344	4.06727		0.93285	7.39798		0.93281	3.74845			0.93079	4.26328		0.92899	7.44287		0.93069	2.75352
0.93418	4.06591		0.9328	7.39733		0.93281	3.74824			0.93079	4.25968		0.92893	7.44078		0.93042	2.754
0.93412	4.06436		0.9328	7.39686		0.93281	3.74816			0.93008	4.25399		0.92893	7.4394		0.93036	2.75344
0.93412	4.0643		0.9328	7.39654		0.93255	3.74806			0.93079	4.2554		0.92893	7.43937		0.9303	2.75254
0.90534	4.03573		0.90385	7.3843		0.90359	3.74651			0.90138	4.23417		0.89992	7.43416		0.90224	2.7508
0.90526	4.03356		0.90379	7.3836		0.90359	3.74702			0.90129	4.23409		0.89979	7.43351		0.90158	2.75063
0.90526	4.03097		0.90379	7.38405		0.90359	3.74768			0.90138	4.2358		0.89979	7.43283		0.90143	2.74998
0.90526	4.02768		0.90379	7.38685		0.90327	3.74764			0.90138	4.2344		0.89979	7.43289		0.90129	2.74861
0.90526	4.02625		0.90379	7.39039		0.9032	3.74695			0.90151	4.23387		0.89979	7.4317		0.90114	2.74776
0.87684	4.01516		0.87514	7.37781		0.87513	3.73709			0.87245	4.20854		0.87111	7.423		0.87297	2.74912
0.87684	4.01736		0.87514	7.38055		0.87451	3.7377			0.87342	4.2081		0.87111	7.42197		0.87283	2.74831
0.87684	4.01876		0.87471	7.38295		0.87439	3.73821			0.87256	4.20708		0.87111	7.421		0.87271	2.74691
0.8764	4.0183		0.8746	7.38433		0.87427	3.73871			0.87342	4.20709		0.87103	7.4209		0.87271	2.74466
0.87631	4.01651		0.87449	7.38384		0.87513	3.73906			0.87342	4.20761		0.87101	7.42065		0.87271	2.7432
0.84793	3.99273		0.84604	7.36446		0.84569	3.74007			0.84376	4.1801		0.84266	7.41195		0.84337	2.73772
0.84793	3.99329		0.84556	7.36406		0.84541	3.73954			0.84313	4.17804		0.84194	7.41127		0.84337	2.73679
0.84717	3.99444		0.84543	7.36452		0.84512	3.73853			0.84376	4.1798		0.84178	7.41012		0.84337	2.73596
0.84701	3.99513		0.84531	7.36415		0.84712	3.73725			0.84329	4.18094		0.84162	7.4095		0.84337	2.73523
0.84684	3.99373		0.84519	7.36133		0.84712	3.73807			0.84376	4.17964		0.84146	7.40858		0.84342	2.73419
0.81781	3.96408		0.81635	7.34712		0.81603	3.73559			0.81387	4.14653		0.81288	7.4017		0.8146	2.73219
0.8177	3.96708		0.81614	7.34425		0.81581	3.73421			0.81387	4.14711		0.81272	7.40161		0.8146	2.73206
0.81759	3.96956		0.81592	7.34206		0.81581	3.73327			0.81364	4.14798		0.81256	7.40123		0.81411	2.73124
0.81748	3.97458		0.8174	7.34132		0.81581	3.73253			0.81387	4.14841		0.81249	7.40006		0.814	2.73078
0.8183	3.97932		0.8174	7.34034		0.81581	3.73211			0.81362	4.14885		0.81249	7.39876		0.81389	2.72959
0.78865	3.90861		0.78713	7.33598		0.78678	3.73167			0.78481	4.11783		0.78312	7.38506		0.78513	2.72518
0.78843	3.90739		0.78684	7.33608		0.78678	3.7311			0.7846	4.11681		0.78297	7.38402		0.78499	2.72459
0.7882	3.90475		0.78671	7.33476		0.78678	3.73066			0.78512	4.11604		0.78297	7.38383		0.78484	2.72365
0.78813	3.90191		0.78671	7.3327		0.78647	3.72997			0.78418	4.11463		0.78297	7.38429		0.78581	2.72202
0.78813	3.90251		0.78671	7.33193		0.7864	3.73048			0.78512	4.11562		0.78297	7.38431		0.78581	2.71965
0.75854	3.9036		0.75695	7.31384		0.75727	3.7247			0.75507	4.08418		0.7539	7.37594		0.75551	2.72327
0.75837	3.90306		0.75671	7.31361		0.75727	3.72419			0.75489	4.0817		0.7539	7.37552		0.75526	2.7229
0.75837	3.89931		0.75671	7.31292		0.75684	3.7244			0.75477	4.08321		0.7539	7.37475		0.75526	2.72274
0.75837	3.8936		0.75671	7.31058		0.75675	3.72461			0.75507	4.08548		0.75363	7.37417		0.75526	2.72229
0.75837	3.88674		0.75671	7.30852		0.75665	3.72472			0.75492	4.0844		0.75357	7.37332		0.75526	2.72197
0.72896	3.8744		0.72746	7.2793		0.72732	3.7158			0.7251	4.044		0.72474	7.36266		0.72581	2.70516
0.72896	3.87271		0.72746	7.27993		0.72721	3.71091			0.72616	4.04098		0.72474	7.36127		0.72581	2.70532
0.72896	3.87133		0.72746	7.28122		0.72709	3.71027			0.72537	4.04301		0.72403	7.36141		0.72581	2.70503
0.72896	3.87043		0.72746	7.28405		0.72698	3.71176			0.72517	4.0428		0.72387	7.36168		0.72539	2.70385
0.72861	3.86953		0.72687	7.28746		0.72781	3.71461			0.72616	4.04099		0.72371	7.36175		0.72529	2.70254
0.69911	3.81837		0.698	7.28086		0.69815	3.71815			0.69583	4.00852		0.69537	7.34882		0.69637	2.69664
0.69911	3.82175		0.698	7.28112		0.69786	3.71761			0.69558	4.00573		0.69472	7.34843		0.69592	2.69668
0.69911	3.82668		0.69736	7.27834		0.69756	3.71759			0.69583	4.00625		0.69458	7.34808		0.69582	2.69687
0.69876	3.83053		0.69723	7.27427		0.69749	3.71648			0.69558	4.00496		0.69444	7.34673		0.69571	2.69794
0.69868	3.83211		0.69709	7.27065		0.69749	3.7162			0.69583	4.00557		0.6943	7.34539		0.6956	2.69868
0.66957	3.79013		0.66884	7.26354		0.66754	3.71503			0.66573	3.96625		0.66525	7.33273		0.66687	2.6977
0.66957	3.78752		0.66807	7.26735		0.66749	3.71393			0.66573	3.96566		0.66503	7.33124		0.66668	2.69769
0.66924	3.78449		0.6679	7.26889		0.66749	3.71292			0.66559	3.96558		0.66481	7.33012		0.66649	2.69765
0.66917	3.78133		0.66773	7.26736		0.66749	3.71434			0.66573	3.96424		0.66459	7.3294		0.6664	2.69706
0.66909	3.78315		0.66884	7.26367		0.66739	3.7148			0.66576	3.9637		0.6662	7.32942		0.6664	2.6962
0.6402	3.75865		0.63819	7.24974		0.63798	3.70809			0.6362	3.91971		0.63552	7.3136		0.63708	2.68587
0.6402	3.75768		0.63789	7.25013		0.63798	3.70687			0.63587	3.91801		0.6352	7.31302		0.63667	2.68509
0.63946	3.75802		0.63759	7.251		0.63798	3.70591			0.63669	3.91612		0.63488	7.31211		0.63647	2.6848
0.63931	3.75894		0.63966	7.25056		0.63798	3.7059			0.6358	3.91701		0.6348	7.31147		0.63647	2.68462
0.63916	3.76075		0.63966	7.2492		0.63753	3.70579			0.63669	3.91676		0.6348	7.31059		0.63647	2.68484
0.61018	3.69014		0.60802	7.21971		0.60838	3.7055			0.60632	3.87236		0.60545	7.29458		0.6068	2.67914
0.60919	3.68819		0.60769	7.21622		0.60774	3.70398			0.60602	3.87119		0.60533	7.29419		0.6068	2.6809
0.60899	3.68716		0.60769	7.21361		0.60758	3.70238			0.60583	3.86778		0.60533	7.29294		0.6068	2.68183
0.60878	3.68689		0.60769	7.21314		0.60742	3.70176			0.60632	3.86942		0.60533	7.2915		0.6068	2.68221
0.61018	3.68839		0.60769	7.21339		0.60727	3.70186			0.60564	3.86918		0.60533	7.2906		0.60657	2.68275
0.5798	3.66843		0.57788	7.18982		0.5783	3.69806			0.57603	3.81555		0.5756	7.27279		0.57706	2.67984
0.57956	3.66566		0.57788	7.1912		0.57803	3.69748			0.57696	3.81509		0.5756	7.27145		0.57706	2.67945
0.57931	3.65939		0.57788	7.1914		0.57775	3.69615			0.57603	3.81219		0.5756	7.27099		0.57706	2.67978
0.57906	3.65306		0.57788	7.19064		0.57748	3.69604			0.5758	3.81193		0.5756	7.27156		0.5767	2.67818
0.57998	3.64856		0.57788	7.18999		0.57942	3.69637			0.57696	3.81015		0.57529	7.27124		0.57662	2.67682
0.54942	3.58349		0.5483	7.16393		0.54825	3.69179			0.54658	3.75615		0.54608	7.25195		0.54741	2.66859
0.54908	3.58243		0.5483	7.16027		0.54795	3.69196			0.54595	3.75384		0.54608	7.25052		0.54695	2.67037
0.54874	3.5812		0.5483	7.15752		0.54765	3.69249			0.54658	3.75324		0.54608	7.24997		0.54684	2.67298
0.54866	3.58119		0.5483	7.15691		0.54754	3.69286			0.5462	3.75303		0.54529	7.25006		0.54673	2.67391
0.54866	3.5825		0.54765	7.15798		0.54754	3.69255			0.54658	3.75286		0.54512	7.24987		0.54661	2.67244
0.51945	3.51464		0.51856	7.13019		0.51849	3.68566			0.5161	3.69187		0.51643	7.23081		0.51769	2.65762
0.51902	3.51425		0.51856	7.12708		0.51812	3.68522			0.5161	3.69053		0.51643	7.23083		0.51751	2.658
0.51899	3.51399		0.51792	7.12466		0.51796	3.68487			0.5161	3.6884		0.51593	7.23019		0.51733	2.6588
0.51899	3.51475		0.51776	7.12266		0.51796	3.68381			0.5161	3.68798		0.51582	7.22946		0.51714	2.65937
0.51899	3.51564		0.5176	7.12235		0.51796	3.68379			0.51588	3.68876		0.51572	7.22956		0.5178	2.65915
0.48921	3.45974		0.48897	7.10321		0.48853	3.6724			0.48676	3.60927		0.48629	7.20279		0.48773	2.64733
0.48906	3.45981		0.48897	7.10278		0.4883	3.6727			0.4865	3.61106		0.48615	7.2027		0.48745	2.64571
0.48906	3.45862		0.48807	7.10033		0.4883	3.67405			0.48714	3.61295		0.486	7.20216		0.48735	2.64421
0.48906	3.45731		0.48789	7.09758		0.4883	3.67352			0.4863	3.61304		0.48699	7.2021		0.48735	2.64323
0.48906	3.45613		0.48771	7.09688		0.4883	3.67357			0.48714	3.61138		0.48699	7.20264		0.48735	2.64519
0.45948	3.40315		0.45865	7.05452		0.45815	3.66948			0.45642	3.5372		0.45651	7.1759		0.45788	2.63726
0.45948	3.40054		0.45842	7.05252		0.45815	3.66948			0.45646	3.53545		0.45611	7.17512		0.45775	2.63725
0.45898	3.39792		0.45819	7.0524		0.45815	3.66919			0.45649	3.53288		0.45577	7.17405		0.45775	2.63709
0.45886	3.39488		0.45796	7.05462		0.45815	3.6694			0.45642	3.53331		0.45577	7.17298		0.45775	2.63596
0.45873	3.39517		0.45956	7.05658		0.45775	3.66898			0.45638	3.53548		0.45577	7.17278		0.45775	2.63506
0.42997	3.30545		0.42869	7.02571		0.42869	3.65975			0.42694	3.45018		0.42624	7.14274		0.42777	2.62593
0.42927	3.30346		0.42845	7.02444		0.42869	3.65923			0.42786	3.44724		0.42624	7.14241		0.42777	2.62513
0.4291	3.30258		0.4282	7.02288		0.42832	3.65909			0.4269	3.4465		0.42624	7.14201		0.42777	2.6244
0.42893	3.30212		0.42987	7.0218		0.42823	3.65883			0.42666	3.44626		0.42624	7.14123		0.42777	2.62428
0.42876	3.30073		0.42987	7.0177		0.42815	3.65876			0.42786	3.44494		0.42605	7.14064		0.42745	2.62533
0.40048	3.20844		0.39881	6.97457		0.39953	3.64818			0.39708	3.35002		0.39686	7.10588		0.39814	2.59983
0.39949	3.20729		0.39847	6.97431		0.39852	3.64666			0.39674	3.3463		0.39686	7.10522		0.39814	2.6001
0.39929	3.20719		0.39832	6.97524		0.39831	3.64495			0.39708	3.34436		0.39686	7.10458		0.39814	2.60112
0.39908	3.20549		0.39832	6.97572		0.39809	3.64352			0.39646	3.34281		0.39686	7.10414		0.39782	2.60306
0.40048	3.20386		0.39832	6.97624		0.39953	3.64333			0.3963	3.3446		0.39638	7.10318		0.39776	2.60646
0.36983	3.12145		0.36873	6.9212		0.36886	3.62968			0.36707	3.23813		0.36704	7.06251		0.36849	2.59891
0.36954	3.11854		0.36847	6.92286		0.36862	3.63048			0.36798	3.23772		0.36704	7.06123		0.36849	2.59904
0.36925	3.11519		0.36847	6.92414		0.36839	3.62961			0.36687	3.23566		0.36675	7.06012		0.36791	2.59713
0.37119	3.11297		0.36847	6.92057		0.36995	3.62931			0.36798	3.23481		0.36668	7.05886		0.36779	2.59543
0.37119	3.11123		0.36847	6.91637		0.36995	3.62924			0.36798	3.23556		0.3666	7.05771		0.36766	2.59511
0.33995	3.01239		0.3385	6.86623		0.33914	3.61945			0.3371	3.11539		0.33802	7.01699		0.33929	2.57905
0.33963	3.00908		0.3385	6.86717		0.33882	3.61851			0.33698	3.11333		0.33802	7.01689		0.3384	2.57831
0.33931	3.00773		0.3385	6.86864		0.3385	3.6183			0.3371	3.11072		0.3371	7.01583		0.33821	2.57785
0.33931	3.00743		0.3385	6.86786		0.33843	3.61826			0.33663	3.11127		0.33691	7.01478		0.33802	2.57768
0.33931	3.00774		0.33826	6.86634		0.33843	3.6183			0.3371	3.10861		0.33672	7.0142		0.33929	2.57643
0.30994	2.87961		0.30878	6.79924		0.30918	3.60045			0.30729	2.97913		0.3075	6.96088		0.30852	2.55917
0.30951	2.87635		0.30878	6.7987		0.30872	3.59958			0.30726	2.97595		0.30725	6.95882		0.3083	2.55862
0.30944	2.87538		0.30878	6.79911		0.30867	3.59927			0.30686	2.97535		0.307	6.9578		0.30808	2.55843
0.30944	2.87442		0.30843	6.79902		0.30867	3.59871			0.30726	2.97243		0.3087	6.95694		0.30805	2.55774
0.30944	2.87275		0.30835	6.79702		0.30867	3.59798			0.30676	2.97293		0.3087	6.95566		0.30805	2.55706
0.27952	2.73185		0.27924	6.72156		0.27894	3.58031			0.27734	2.82238		0.27776	6.89376		0.27855	2.53974
0.27952	2.73135		0.27924	6.71951		0.2787	3.57968			0.27697	2.81746		0.27741	6.89294		0.27847	2.53811
0.27952	2.73137		0.2786	6.71798		0.2787	3.57855			0.27789	2.8152		0.27713	6.8919		0.27847	2.53678
0.27915	2.73163		0.27846	6.71806		0.2787	3.57722			0.27717	2.81527		0.27713	6.89088		0.27847	2.53581
0.27906	2.73108		0.27832	6.71962		0.2787	3.57798			0.27789	2.81532		0.27713	6.8907		0.27847	2.53552
0.24936	2.59144		0.24959	6.62633		0.24886	3.55649			0.24733	2.64332		0.24727	6.81455		0.24842	2.50318
0.24936	2.58709		0.24872	6.62649		0.24886	3.55615			0.24705	2.63905		0.24727	6.81302		0.24842	2.50336
0.24936	2.58385		0.24854	6.62667		0.24886	3.55554			0.24684	2.63887		0.24727	6.81132		0.24842	2.50438
0.24904	2.58194		0.24835	6.62484		0.24886	3.55193			0.24733	2.63842		0.24727	6.81035		0.2482	2.50599
0.24898	2.58073		0.24959	6.62221		0.24855	3.55114			0.24675	2.63689		0.24718	6.80896		0.24815	2.50811
0.22009	2.4133		0.21902	6.51835		0.21923	3.52778			0.21709	2.44317		0.21786	6.72079		0.21938	2.48734
0.21916	2.41047		0.21868	6.51637		0.21923	3.52651			0.21785	2.43934		0.21786	6.71793		0.21938	2.48577
0.21897	2.40661		0.21835	6.5151		0.21865	3.52567			0.21699	2.43874		0.21786	6.71557		0.21849	2.48418
0.21878	2.40319		0.22063	6.51377		0.21852	3.52573			0.21676	2.43802		0.21752	6.71414		0.2183	2.4826
0.22009	2.39936		0.22063	6.50937		0.21839	3.52585			0.21785	2.43542		0.21744	6.7148		0.21812	2.48175
0.18953	2.21766		0.18848	6.36698		0.18963	3.49033			0.18706	2.21391		0.18804	6.59776		0.18934	2.44641
0.18924	2.21413		0.18824	6.3647		0.18889	3.48861			0.18685	2.20962		0.18763	6.59506		0.18856	2.44475
0.18895	2.2108		0.18824	6.3622		0.18873	3.48658			0.18706	2.20872		0.18754	6.59312		0.1884	2.44318
0.19083	2.20722		0.18824	6.36094		0.18857	3.48531			0.18706	2.20762		0.18745	6.59155		0.18823	2.44214
0.19083	2.204		0.18824	6.36027		0.18841	3.48376			0.18666	2.2076		0.18736	6.59038		0.18934	2.44197
0.15921	1.97674		0.15878	6.18851		0.15934	3.43632			0.15737	1.95618		0.15831	6.4399		0.1591	2.40542
0.1589	1.97331		0.15878	6.18266		0.15911	3.43529			0.15869	1.95198		0.15808	6.43629		0.15887	2.40434
0.15887	1.97125		0.15878	6.17742		0.15887	3.43428			0.15718	1.95022		0.15786	6.43392		0.15864	2.40254
0.15887	1.97006		0.15824	6.17269		0.16041	3.43318			0.15869	1.94958		0.15764	6.43197		0.16019	2.40189
0.15887	1.96915		0.15811	6.17015		0.16041	3.43281			0.15869	1.94919		0.15926	6.43095		0.16019	2.40118
0.12922	1.71429		0.12902	5.94273		0.12916	3.36109			0.12775	1.66416		0.12824	6.21754		0.12894	2.33387
0.12904	1.70888		0.12902	5.93688		0.12881	3.36074			0.12716	1.65887		0.12795	6.21288		0.12859	2.33434
0.12904	1.70546		0.12859	5.93236		0.12852	3.35865			0.12775	1.65249		0.12785	6.20923		0.12859	2.33451
0.12904	1.70263		0.12849	5.92929		0.12852	3.35207			0.12699	1.6548		0.12785	6.20621		0.12859	2.33371
0.12904	1.69996		0.12839	5.92793		0.12852	3.35336			0.12775	1.65333		0.12785	6.20411		0.12859	2.33284
0.099	1.39822		0.0991	5.58909		0.09903	3.25218			0.09694	1.33347		0.09794	5.90207		0.09833	2.24414
0.099	1.39256		0.09855	5.57986		0.09861	3.24939			0.09694	1.32764		0.09789	5.89497		0.09833	2.24205
0.099	1.38963		0.09842	5.57287		0.09861	3.24621			0.09701	1.32425		0.09789	5.88971		0.09833	2.23992
0.09866	1.38844		0.09828	5.56822		0.09861	3.24361			0.09694	1.32236		0.09789	5.8846		0.09833	2.23756
0.09859	1.38784		0.09815	5.56586		0.09861	3.24053			0.09698	1.32147		0.09789	5.88132		0.09808	2.23605
0.08846	1.2783		0.08804	5.41696		0.0883	3.18221			0.08722	1.20798		0.08804	5.74147		0.08822	2.19754
0.08836	1.27544		0.08804	5.41167		0.08817	3.18284			0.08707	1.20412		0.08787	5.73795		0.08798	2.19702
0.08836	1.27275		0.08804	5.40807		0.08804	3.18341			0.08722	1.20235		0.0877	5.73492		0.08797	2.19654
0.08836	1.27046		0.088	5.40576		0.08804	3.1835			0.08722	1.20214		0.08767	5.73332		0.08797	2.19616
0.08836	1.26908		0.08799	5.40469		0.08804	3.18201			0.08687	1.20146		0.08767	5.72991		0.08797	2.19377
0.07834	1.1515		0.07777	5.22781		0.07893	3.11269			0.07713	1.08303		0.07838	5.5669		0.07813	2.13663
0.07822	1.14878		0.07771	5.22194		0.0783	3.11117			0.07676	1.0804		0.07782	5.56175		0.078	2.1368
0.07816	1.1469		0.07771	5.21742		0.07816	3.11061			0.07713	1.0782		0.07769	5.55913		0.07788	2.13704
0.07816	1.14511		0.07771	5.21471		0.07802	3.10997			0.0767	1.07687		0.07756	5.55636		0.07788	2.13779
0.07816	1.14405		0.07771	5.21427		0.07893	3.1108			0.07713	1.07663		0.07743	5.55434		0.07788	2.13853
0.06841	1.02515		0.06805	5.02017		0.06843	3.04614			0.06678	0.95424		0.06792	5.36027		0.06855	2.08404
0.06833	1.02308		0.06788	5.01525		0.06843	3.04376			0.06705	0.95199		0.06792	5.35675		0.06833	2.0832
0.06824	1.02147		0.06782	5.01151		0.06843	3.04233			0.06705	0.95151		0.06772	5.35379		0.06828	2.08189
0.06821	1.01987		0.06782	5.00848		0.06824	3.04149			0.06682	0.95132		0.06768	5.35101		0.06823	2.0794
0.06821	1.01854		0.06782	5.00648		0.0682	3.0392			0.06705	0.9505		0.06763	5.34818		0.06855	2.07671
0.05836	0.89363		0.05829	4.76273		0.05836	2.93744			0.05704	0.82449		0.05794	5.1165		0.05858	1.99948
0.05827	0.89107		0.05815	4.75523		0.05836	2.93456			0.05744	0.82081		0.05794	5.10839		0.05858	1.9966
0.05817	0.88966		0.05801	4.74911		0.05836	2.9317			0.05708	0.81967		0.05794	5.10233		0.05815	1.99489
0.05807	0.88928		0.05787	4.74446		0.05836	2.92949			0.05744	0.82026		0.05794	5.09858		0.05804	1.99383
0.05877	0.88827		0.05888	4.7416		0.05808	2.92926			0.05744	0.81885		0.05762	5.09503		0.05794	1.99361
0.0487	0.75891		0.04809	4.44333		0.04834	2.80487			0.04674	0.69157		0.04826	4.80164		0.04813	1.90835
0.0487	0.7552		0.04809	4.43511		0.04812	2.80222			0.04674	0.68769		0.04806	4.79288		0.04813	1.90506
0.04839	0.75217		0.04809	4.42845		0.04796	2.80046			0.04656	0.68572		0.04803	4.78584		0.04813	1.90204
0.04832	0.75014		0.04795	4.42308		0.04796	2.79879			0.04674	0.68492		0.04803	4.77991		0.04813	1.89952
0.04825	0.7487		0.04792	4.4183		0.04796	2.79809			0.0467	0.68351		0.04803	4.77526		0.04791	1.89729
0.03789	0.61066		0.03768	4.02818		0.03859	2.62878			0.03651	0.54836		0.03763	4.37666		0.03797	1.75653
0.03789	0.60695		0.0376	4.01631		0.03796	2.62264			0.03636	0.54484		0.03747	4.36512		0.03777	1.7533
0.03789	0.60385		0.0376	4.00599		0.03782	2.61741			0.03651	0.54335		0.03732	4.35592		0.03762	1.75093
0.03789	0.60186		0.0376	3.99722		0.03769	2.61416			0.03651	0.54111		0.03729	4.34913		0.03762	1.74943
0.0377	0.59967		0.0376	3.9902		0.03859	2.60909			0.03648	0.54041		0.03729	4.343		0.03762	1.74871
0.02837	0.45989		0.02815	3.50392		0.02831	2.39564			0.02697	0.41401		0.02887	3.85589		0.0284	1.5654
0.02828	0.4568		0.02802	3.48733		0.02831	2.38619			0.02663	0.40895		0.02827	3.83871		0.02825	1.56029
0.02828	0.45422		0.02788	3.47429		0.02831	2.37702			0.02697	0.40727		0.02814	3.82379		0.0281	1.55599
0.02828	0.45251		0.02782	3.4638		0.02822	2.37			0.02658	0.405		0.028	3.81149		0.02911	1.55219
0.02828	0.45075		0.02782	3.45533		0.0282	2.36589			0.02697	0.40411		0.02787	3.80209		0.02911	1.54912
0.01848	0.31117		0.01837	2.76864		0.01842	2.04393			0.01683	0.27121		0.0184	3.0617		0.01846	1.29133
0.01837	0.30703		0.01837	2.74453		0.01823	2.03029			0.01752	0.26681		0.0184	3.03857		0.01846	1.28263
0.01826	0.30349		0.01788	2.72528		0.01823	2.0202			0.01671	0.26472		0.01805	3.01872		0.0181	1.27491
0.01904	0.30056		0.01778	2.70975		0.01823	2.01241			0.01649	0.26318		0.01797	3.00234		0.01802	1.26848
0.01904	0.29821		0.01768	2.6968		0.01823	2.0058			0.01752	0.2624		0.0179	2.98909		0.01794	1.26382
0.00862	0.1522		0.00835	1.70279		0.00872	1.46039			0.00717	0.12807		0.00958	2.11341		0.00849	0.84236
0.00849	0.14917		0.00835	1.66523		0.00858	1.44252			0.00676	0.12427		0.00958	2.01608		0.00849	0.82955
0.00836	0.14644		0.00835	1.63558		0.00858	1.427			0.00717	0.122		0.00851	1.93816		0.00824	0.81876
0.00927	0.14377		0.00786	1.61008		0.00858	1.41395			0.00717	0.11998		0.00826	1.87638		0.00819	0.80957
0.00927	0.14256		0.00776	1.58984		0.00858	1.40195			0.00652	0.11926		0.00802	1.83015		0.00813	0.80267
-0.00101	0.00548		-0.00102	0.06567		-0.00076241	0.18435			-0.0022	-0.00393		-0.00106	0.02374		-0.000926576	0.08198
-0.00111	0.0015		-0.00102	0.01045		-0.000984525	0.11569			-0.00245	-0.01007		-0.00106	-0.03004		-0.000926576	0.05432
-0.0012	-0.00138		-0.00102	-0.03366		-0.0012	0.05574			-0.00188	-0.01399		-0.00106	-0.07491		-0.000926576	0.03179
-0.0013	-0.00385		-0.00102	-0.06964		-0.0012	0.00639			-0.00287	-0.01613		-0.00153	-0.11018		-0.00123	0.01299
-0.000628855	-0.00647		-0.00155	-0.09798		-0.0012	-0.03475			-0.00188	-0.0181		-0.00163	-0.13724		-0.0013	-0.0014
-0.01167	-0.16187		-0.01055	-1.6645		-0.01149	-1.46148			-0.01264	-0.15426		-0.0109	-1.86843		-0.01139	-0.81007
-0.01174	-0.16541		-0.01125	-1.69623		-0.01149	-1.48088			-0.01264	-0.16009		-0.01099	-1.90423		-0.01154	-0.82408
-0.01174	-0.16851		-0.01139	-1.72198		-0.01149	-1.49574			-0.01312	-0.16299		-0.01107	-1.9314		-0.01169	-0.83539
-0.01174	-0.17111		-0.01153	-1.7427		-0.0117	-1.508			-0.01264	-0.1646		-0.01051	-1.9527		-0.01184	-0.84454
-0.01174	-0.1734		-0.01055	-1.75898		-0.01175	-1.51714			-0.01334	-0.16675		-0.01051	-1.96963		-0.01077	-0.85104
-0.02194	-0.31587		-0.0205	-2.74116		-0.02144	-2.03592			-0.0227	-0.30141		-0.02103	-3.05864		-0.02157	-1.25328
-0.022	-0.31869		-0.02123	-2.76215		-0.02144	-2.04663			-0.02243	-0.30496		-0.02117	-3.08122		-0.02171	-1.26052
-0.022	-0.32136		-0.02138	-2.77923		-0.02144	-2.05518			-0.02243	-0.30711		-0.02131	-3.09924		-0.02184	-1.2668
-0.022	-0.3242		-0.02152	-2.79208		-0.02144	-2.06145			-0.02325	-0.30869		-0.02039	-3.11397		-0.02198	-1.27231
-0.022	-0.3267		-0.0205	-2.80267		-0.02187	-2.06671			-0.02243	-0.30956		-0.02039	-3.12502		-0.02101	-1.27712
-0.03199	-0.47078		-0.03053	-3.48674		-0.03149	-2.3943			-0.03275	-0.44419		-0.03078	-3.84611		-0.03086	-1.52763
-0.03204	-0.4744		-0.03109	-3.50105		-0.03149	-2.40083			-0.03312	-0.44813		-0.03087	-3.86077		-0.03145	-1.53306
-0.03204	-0.4777		-0.0312	-3.5128		-0.03149	-2.40619			-0.03275	-0.44957		-0.03096	-3.87289		-0.03157	-1.53736
-0.03204	-0.48021		-0.03132	-3.52252		-0.03149	-2.41022			-0.03275	-0.45083		-0.03105	-3.88283		-0.03169	-1.54079
-0.03204	-0.48194		-0.03053	-3.53055		-0.03187	-2.41307			-0.03322	-0.45229		-0.03039	-3.89049		-0.03086	-1.54411
-0.04167	-0.62075		-0.04082	-4.01633		-0.04167	-2.62969			-0.0422	-0.57815		-0.0404	-4.40183		-0.04097	-1.71826
-0.04188	-0.62465		-0.04082	-4.02797		-0.04168	-2.63352			-0.04279	-0.58221		-0.04078	-4.4115		-0.04097	-1.72151
-0.04196	-0.62796		-0.04111	-4.03682		-0.04168	-2.63699			-0.0422	-0.58527		-0.04086	-4.4193		-0.04155	-1.72356
-0.04196	-0.6302		-0.04117	-4.04345		-0.04168	-2.63973			-0.04279	-0.58689		-0.04094	-4.42538		-0.04167	-1.72582
-0.04196	-0.6313		-0.04123	-4.04884		-0.04168	-2.64029			-0.0422	-0.58896		-0.0404	-4.43146		-0.04178	-1.72834
-0.05183	-0.7688		-0.05145	-4.44543		-0.05175	-2.81005			-0.05308	-0.72183		-0.05088	-4.81949		-0.05199	-1.8681
-0.05197	-0.7729		-0.05145	-4.45458		-0.05189	-2.81327			-0.0528	-0.72595		-0.05088	-4.8298		-0.05199	-1.87107
-0.05212	-0.77648		-0.05145	-4.46251		-0.05193	-2.81687			-0.0528	-0.72916		-0.05088	-4.83778		-0.05199	-1.87418
-0.05227	-0.779		-0.05168	-4.46785		-0.05193	-2.82048			-0.05337	-0.72962		-0.05139	-4.84359		-0.05237	-1.87679
-0.05122	-0.78042		-0.05173	-4.47174		-0.05193	-2.82294			-0.0528	-0.73067		-0.0515	-4.84682		-0.05244	-1.87816
-0.06199	-0.91211		-0.06154	-4.76817		-0.06213	-2.94896			-0.0631	-0.8576		-0.06139	-5.14506		-0.06221	-1.97752
-0.06199	-0.91509		-0.0616	-4.77542		-0.06228	-2.95137			-0.06254	-0.86195		-0.06139	-5.15124		-0.0623	-1.9803
-0.06264	-0.91767		-0.0616	-4.78034		-0.06243	-2.95341			-0.06332	-0.86383		-0.06139	-5.15673		-0.0623	-1.9823
-0.06277	-0.91959		-0.0616	-4.78392		-0.06134	-2.95515			-0.06254	-0.86474		-0.06139	-5.16122		-0.0623	-1.9835
-0.0629	-0.92085		-0.0616	-4.78716		-0.06134	-2.95574			-0.06254	-0.86499		-0.06156	-5.16385		-0.0623	-1.9838
-0.0722	-1.04706		-0.07157	-5.02388		-0.08167	-3.12936			-0.07306	-0.98665		-0.07132	-5.39603		-0.07225	-2.05964
-0.0722	-1.04886		-0.07178	-5.03071		-0.08167	-3.13075			-0.07306	-0.99065		-0.07149	-5.40028		-0.07243	-2.0609
-0.0722	-1.05009		-0.072	-5.0366		-0.08167	-3.13082			-0.07326	-0.99015		-0.07149	-5.40265		-0.07245	-2.06195
-0.07254	-1.05194		-0.07208	-5.04196		-0.0822	-3.12994			-0.07306	-0.99379		-0.07149	-5.40536		-0.07245	-2.06127
-0.07261	-1.05292		-0.07208	-5.04542		-0.08231	-3.12878			-0.07347	-0.995		-0.07149	-5.40772		-0.07245	-2.06106
-0.08226	-1.17133		-0.08117	-5.24338		-0.09208	-3.19525			-0.08306	-1.11129		-0.08123	-5.59277		-0.08207	-2.12138
-0.08226	-1.17401		-0.08156	-5.2478		-0.09221	-3.19714			-0.08332	-1.11327		-0.08144	-5.59697		-0.08223	-2.12121
-0.08226	-1.1762		-0.08165	-5.25139		-0.09221	-3.19812			-0.08349	-1.11728		-0.08156	-5.59953		-0.08239	-2.1209
-0.08226	-1.17743		-0.08174	-5.25435		-0.09221	-3.19894			-0.08306	-1.11751		-0.08156	-5.60266		-0.08243	-2.11949
-0.08269	-1.17878		-0.08184	-5.25607		-0.09221	-3.19969			-0.08331	-1.11854		-0.08156	-5.60503		-0.08243	-2.1183
-0.0926	-1.28916		-0.09166	-5.42898		-0.10184	-3.24993			-0.09304	-1.23423		-0.0911	-5.76426		-0.09204	-2.16948
-0.0926	-1.29136		-0.09166	-5.43255		-0.10197	-3.2536			-0.09314	-1.23826		-0.09123	-5.76734		-0.09216	-2.16943
-0.0926	-1.29212		-0.09202	-5.43511		-0.10199	-3.25562			-0.09304	-1.23864		-0.09136	-5.76941		-0.09228	-2.16914
-0.0926	-1.29332		-0.0921	-5.43642		-0.10199	-3.25548			-0.09334	-1.24019		-0.09053	-5.77219		-0.0924	-2.17021
-0.0926	-1.29447		-0.09219	-5.43789		-0.10199	-3.25443			-0.09341	-1.24224		-0.09053	-5.7747		-0.09155	-2.17182
-0.10226	-1.4046		-0.10173	-5.58825		-0.10246	-3.25595			-0.1032	-1.34776		-0.10064	-5.90935		-0.10184	-2.21739
-0.10239	-1.40758		-0.10173	-5.5933		-0.10251	-3.25689			-0.1034	-1.3528		-0.1011	-5.91177		-0.10204	-2.2189
-0.1024	-1.41008		-0.10173	-5.59635		-0.10256	-3.25739			-0.10294	-1.35426		-0.1012	-5.91366		-0.10209	-2.22013
-0.1024	-1.41211		-0.10173	-5.59852		-0.10256	-3.25852			-0.10331	-1.3551		-0.1013	-5.91538		-0.10213	-2.22048
-0.1024	-1.41378		-0.10201	-5.59989		-0.10256	-3.25977			-0.10294	-1.35292		-0.1014	-5.91662		-0.10218	-2.22034
-0.1027	-1.41428		-0.10234	-5.60344		-0.13173	-3.36618			-0.10331	-1.35638		-0.10177	-5.92198		-0.1023	-2.21455
-0.10269	-1.41483		-0.10235	-5.60257		-0.13179	-3.369			-0.10321	-1.35802		-0.10177	-5.92219		-0.1023	-2.21478
-0.10269	-1.4144		-0.10236	-5.60302		-0.13179	-3.37055			-0.10342	-1.35627		-0.10177	-5.92283		-0.1023	-2.2156
-0.10269	-1.41398		-0.10236	-5.60311		-0.13179	-3.37033			-0.10348	-1.35647		-0.10156	-5.92309		-0.10256	-2.2155
-0.10269	-1.41338		-0.10236	-5.60217		-0.13179	-3.36933			-0.10321	-1.35759		-0.10151	-5.92443		-0.10261	-2.21475
-0.13194	-1.6934		-0.13154	-5.9296		-0.1608	-3.44484			-0.13242	-1.67097		-0.12996	-6.22467		-0.13083	-2.3046
-0.1323	-1.70039		-0.13163	-5.93398		-0.1608	-3.44722			-0.13274	-1.67686		-0.13074	-6.22876		-0.13188	-2.30373
-0.1323	-1.70537		-0.13163	-5.93673		-0.1608	-3.44917			-0.13242	-1.67919		-0.13092	-6.23114		-0.13209	-2.30373
-0.1323	-1.7088		-0.13163	-5.93875		-0.16124	-3.44731			-0.13314	-1.68132		-0.13109	-6.23296		-0.13231	-2.3045
-0.1323	-1.71064		-0.13163	-5.94031		-0.16134	-3.44776			-0.13332	-1.68089		-0.12996	-6.23498		-0.13083	-2.30533
-0.16158	-1.9648		-0.16071	-6.19022		-0.19003	-3.51106			-0.16203	-1.95579		-0.16009	-6.44825		-0.16127	-2.35059
-0.16158	-1.96773		-0.16071	-6.19176		-0.19072	-3.5148			-0.16004	-1.96174		-0.16042	-6.45041		-0.16159	-2.35267
-0.16158	-1.97037		-0.16071	-6.19411		-0.19087	-3.51779			-0.16195	-1.96571		-0.16073	-6.45192		-0.16178	-2.35413
-0.16197	-1.97239		-0.16109	-6.19707		-0.19102	-3.5185			-0.16004	-1.96778		-0.16073	-6.45335		-0.16178	-2.35499
-0.16205	-1.97313		-0.16118	-6.19945		-0.19003	-3.51695			-0.16004	-1.96769		-0.16073	-6.45437		-0.16178	-2.35544
-0.19097	-2.18747		-0.18975	-6.37172		-0.21992	-3.55238			-0.19137	-2.21239		-0.18956	-6.60746		-0.19084	-2.39188
-0.19146	-2.19105		-0.19056	-6.37274		-0.22024	-3.54919			-0.19169	-2.2162		-0.18959	-6.61096		-0.19084	-2.38935
-0.19157	-2.1922		-0.19073	-6.37368		-0.22056	-3.54754			-0.19096	-2.22081		-0.18959	-6.61286		-0.19084	-2.38753
-0.19168	-2.19377		-0.19091	-6.37437		-0.21846	-3.5465			-0.1917	-2.21867		-0.18959	-6.61289		-0.19084	-2.38686
-0.19097	-2.19536		-0.18975	-6.37609		-0.21846	-3.54834			-0.19096	-2.22087		-0.18959	-6.61335		-0.1912	-2.38619
-0.22107	-2.39105		-0.22011	-6.51979		-0.24996	-3.57803			-0.22135	-2.43504		-0.21883	-6.73416		-0.22038	-2.4215
-0.2214	-2.39441		-0.22048	-6.52103		-0.25031	-3.58042			-0.2216	-2.43986		-0.21883	-6.73562		-0.22038	-2.42114
-0.22174	-2.39774		-0.22083	-6.52161		-0.25031	-3.58492			-0.2218	-2.43934		-0.21936	-6.73654		-0.22094	-2.42042
-0.22175	-2.4008		-0.22083	-6.5228		-0.25031	-3.58891			-0.22135	-2.4422		-0.21949	-6.73657		-0.22107	-2.41889
-0.22175	-2.40363		-0.22083	-6.5242		-0.25031	-3.59102			-0.22158	-2.44397		-0.21962	-6.73636		-0.2212	-2.41675
-0.25129	-2.56282		-0.25012	-6.64484		-0.27968	-3.60948			-0.25085	-2.63439		-0.24797	-6.83243		-0.25006	-2.44713
-0.25129	-2.56485		-0.25012	-6.64387		-0.27968	-3.61328			-0.25008	-2.63826		-0.24797	-6.83329		-0.25025	-2.44724
-0.25129	-2.56703		-0.25012	-6.64311		-0.27968	-3.61433			-0.25092	-2.64018		-0.24876	-6.83425		-0.25044	-2.44626
-0.25129	-2.56846		-0.25012	-6.64277		-0.27968	-3.61322			-0.25114	-2.64244		-0.24893	-6.83474		-0.25062	-2.44561
-0.25138	-2.56896		-0.25027	-6.64324		-0.27993	-3.61209			-0.25008	-2.64283		-0.2491	-6.83566		-0.24927	-2.44514
-0.28034	-2.70649		-0.27942	-6.74079		-0.30895	-3.62773			-0.2806	-2.80863		-0.27782	-6.90832		-0.27992	-2.46582
-0.28034	-2.70966		-0.27942	-6.74446		-0.30895	-3.63156			-0.28085	-2.81298		-0.27801	-6.90786		-0.2803	-2.46828
-0.28034	-2.71315		-0.27976	-6.74751		-0.30942	-3.63386			-0.2806	-2.81501		-0.27819	-6.90781		-0.28041	-2.47092
-0.28095	-2.71682		-0.27984	-6.74893		-0.30952	-3.63447			-0.28081	-2.81243		-0.27695	-6.90851		-0.28041	-2.47249
-0.2811	-2.71951		-0.27992	-6.7468		-0.30963	-3.63535			-0.28087	-2.81454		-0.27695	-6.90932		-0.28041	-2.47291
-0.30986	-2.85779		-0.30879	-6.82959		-0.33848	-3.65322			-0.31036	-2.96399		-0.30746	-6.97606		-0.30968	-2.48944
-0.30986	-2.85998		-0.30905	-6.82934		-0.33869	-3.65259			-0.30869	-2.96408		-0.30785	-6.97673		-0.30968	-2.49057
-0.31051	-2.86195		-0.30932	-6.82843		-0.33889	-3.65239			-0.31015	-2.96561		-0.30785	-6.97725		-0.30968	-2.49162
-0.31063	-2.86225		-0.30959	-6.82795		-0.33909	-3.65278			-0.30869	-2.96654		-0.30785	-6.97738		-0.30968	-2.4932
-0.31076	-2.86065		-0.30865	-6.82751		-0.33759	-3.65341			-0.30869	-2.96754		-0.30785	-6.97741		-0.31012	-2.49448
-0.3401	-2.97113		-0.33857	-6.89631		-0.36792	-3.64721			-0.33963	-3.09891		-0.33721	-7.02981		-0.33877	-2.51917
-0.34031	-2.97215		-0.33886	-6.8983		-0.36823	-3.64778			-0.34009	-3.10236		-0.33721	-7.03117		-0.33877	-2.51877
-0.34052	-2.97228		-0.33897	-6.89908		-0.36823	-3.64818			-0.33908	-3.10491		-0.33721	-7.03229		-0.33935	-2.51826
-0.33908	-2.97213		-0.33897	-6.89893		-0.36823	-3.64799			-0.3399	-3.1033		-0.33721	-7.03233		-0.33949	-2.51795
-0.33908	-2.97177		-0.33897	-6.89755		-0.36823	-3.64773			-0.33908	-3.10338		-0.33736	-7.03134		-0.33962	-2.5164
-0.36974	-3.08898		-0.36827	-6.9609		-0.39791	-3.66595			-0.36917	-3.2249		-0.36598	-7.08022		-0.36826	-2.53759
-0.37002	-3.09152		-0.3686	-6.96158		-0.39791	-3.66622			-0.36917	-3.22517		-0.36598	-7.08055		-0.36848	-2.53812
-0.37002	-3.09216		-0.3686	-6.96356		-0.39791	-3.66501			-0.36914	-3.22557		-0.36663	-7.0807		-0.36869	-2.53818
-0.37002	-3.09135		-0.3686	-6.96714		-0.39791	-3.66425			-0.36917	-3.22855		-0.36679	-7.08095		-0.36891	-2.53825
-0.37002	-3.08951		-0.3686	-6.9701		-0.39835	-3.66208			-0.3692	-3.22802		-0.36695	-7.08134		-0.3673	-2.53653
-0.3991	-3.18078		-0.39739	-7.01835		-0.42691	-3.67038			-0.39845	-3.3371		-0.39569	-7.121		-0.39802	-2.54956
-0.3991	-3.18073		-0.39739	-7.02005		-0.42691	-3.67173			-0.39806	-3.34069		-0.39594	-7.12232		-0.39853	-2.54959
-0.3991	-3.17958		-0.39739	-7.02013		-0.42772	-3.67286			-0.39806	-3.33901		-0.39619	-7.12393		-0.39859	-2.55051
-0.39953	-3.17843		-0.39794	-7.02012		-0.42788	-3.67326			-0.39878	-3.34124		-0.39645	-7.12412		-0.39859	-2.55094
-0.39963	-3.17902		-0.39807	-7.01936		-0.42805	-3.67376			-0.39806	-3.34117		-0.39464	-7.12394		-0.39859	-2.54998
-0.42827	-3.25915		-0.42721	-7.06711		-0.45683	-3.68759			-0.4284	-3.43602		-0.42401	-7.14634		-0.42795	-2.56173
-0.42879	-3.26002		-0.42759	-7.06785		-0.45716	-3.6887			-0.42849	-3.43629		-0.42453	-7.15182		-0.42795	-2.55843
-0.42891	-3.26159		-0.42768	-7.06892		-0.45748	-3.68736			-0.42855	-3.43913		-0.42505	-7.15524		-0.42795	-2.5569
-0.42904	-3.26246		-0.42777	-7.07013		-0.45519	-3.68684			-0.4284	-3.43181		-0.42514	-7.15744		-0.42795	-2.55853
-0.42916	-3.2626		-0.42786	-7.07106		-0.45519	-3.68835			-0.42896	-3.43289		-0.42514	-7.1578		-0.42831	-2.56128
-0.45856	-3.33695		-0.45711	-7.09884		-0.48634	-3.69172			-0.45782	-3.52276		-0.45469	-7.19193		-0.4572	-2.56352
-0.4588	-3.33655		-0.45741	-7.10175		-0.48692	-3.69324			-0.45683	-3.52477		-0.45469	-7.19197		-0.4572	-2.56287
-0.45904	-3.33692		-0.45772	-7.10494		-0.48718	-3.6941			-0.45817	-3.52269		-0.45469	-7.19214		-0.45783	-2.56264
-0.45732	-3.3389		-0.45774	-7.10688		-0.48718	-3.69441			-0.45851	-3.52216		-0.45469	-7.19195		-0.45797	-2.56141
-0.45732	-3.34085		-0.45774	-7.10527		-0.48718	-3.69447			-0.45683	-3.52262		-0.45494	-7.19211		-0.45811	-2.5641
-0.48866	-3.43538		-0.4869	-7.13547		-0.51629	-3.70878			-0.4875	-3.60477		-0.48425	-7.22384		-0.48708	-2.58126
-0.48881	-3.4407		-0.48699	-7.13673		-0.51629	-3.71018			-0.48794	-3.60349		-0.48425	-7.22416		-0.48729	-2.58132
-0.48881	-3.44299		-0.48699	-7.13648		-0.51629	-3.71159			-0.4875	-3.60305		-0.48471	-7.22471		-0.48749	-2.58051
-0.48881	-3.4437		-0.48699	-7.13628		-0.51629	-3.71199			-0.48798	-3.60364		-0.48482	-7.22494		-0.4877	-2.57943
-0.48881	-3.4422		-0.48699	-7.13675		-0.5165	-3.71044			-0.4881	-3.60551		-0.48494	-7.22488		-0.4862	-2.57888
-0.51805	-3.48535		-0.51664	-7.16837		-0.5458	-3.725			-0.51746	-3.66992		-0.51304	-7.24822		-0.51655	-2.58741
-0.51805	-3.48671		-0.51664	-7.16542		-0.5458	-3.72522			-0.51746	-3.6652		-0.51413	-7.24796		-0.51701	-2.58807
-0.51805	-3.48704		-0.51664	-7.16371		-0.54611	-3.7253			-0.51802	-3.67112		-0.51436	-7.24851		-0.51747	-2.58844
-0.51851	-3.4878		-0.517	-7.16345		-0.54617	-3.72453			-0.51746	-3.67377		-0.51459	-7.24882		-0.5176	-2.58783
-0.51861	-3.48808		-0.51708	-7.16275		-0.54624	-3.72402			-0.51789	-3.66711		-0.51304	-7.24876		-0.5176	-2.58641
-0.54753	-3.53687		-0.54568	-7.19371		-0.57555	-3.7356			-0.54726	-3.74521		-0.54395	-7.27154		-0.54699	-2.59605
-0.54753	-3.53495		-0.54666	-7.19711		-0.57582	-3.73678			-0.54671	-3.74551		-0.54435	-7.27164		-0.54717	-2.59602
-0.54822	-3.53313		-0.54686	-7.19992		-0.5761	-3.73708			-0.54671	-3.74695		-0.54456	-7.2714		-0.54717	-2.59567
-0.54837	-3.53346		-0.54706	-7.19997		-0.57617	-3.73625			-0.54762	-3.7465		-0.54456	-7.27117		-0.54717	-2.59551
-0.54851	-3.53731		-0.54568	-7.20101		-0.57617	-3.73561			-0.54671	-3.7418		-0.54456	-7.27132		-0.54717	-2.59614
-0.57785	-3.60959		-0.57604	-7.23337		-0.60586	-3.73686			-0.5769	-3.79534		-0.57363	-7.29804		-0.57645	-2.60352
-0.57814	-3.60949		-0.57642	-7.23203		-0.60601	-3.73576			-0.57739	-3.80257		-0.57363	-7.29804		-0.57645	-2.60487
-0.57843	-3.6084		-0.57663	-7.23241		-0.60601	-3.7352			-0.57773	-3.80308		-0.57363	-7.29771		-0.57645	-2.6057
-0.57648	-3.60746		-0.57663	-7.23481		-0.60601	-3.73592			-0.5769	-3.79765		-0.57363	-7.29785		-0.57707	-2.6051
-0.57648	-3.60696		-0.57663	-7.23358		-0.60601	-3.73712			-0.57725	-3.80235		-0.57416	-7.29679		-0.57722	-2.60481
-0.60802	-3.65511		-0.60614	-7.25667		-0.63574	-3.7142			-0.60652	-3.85827		-0.60279	-7.31826		-0.60617	-2.61147
-0.60842	-3.65632		-0.60655	-7.25464		-0.63574	-3.71553			-0.60584	-3.85996		-0.60279	-7.31709		-0.6069	-2.61018
-0.60842	-3.65822		-0.60655	-7.25373		-0.63574	-3.7157			-0.60688	-3.85827		-0.60357	-7.31755		-0.60707	-2.60967
-0.60842	-3.65947		-0.60655	-7.25268		-0.63606	-3.71506			-0.60715	-3.85613		-0.60374	-7.31766		-0.60724	-2.60893
-0.60842	-3.65975		-0.60655	-7.24953		-0.63613	-3.71326			-0.60584	-3.85733		-0.6039	-7.3173		-0.60742	-2.60852
-0.63813	-3.70215		-0.63628	-7.2787		-0.66559	-3.71488			-0.63693	-3.91066		-0.63317	-7.33634		-0.63622	-2.62196
-0.63813	-3.69984		-0.63628	-7.27527		-0.66559	-3.71702			-0.63705	-3.91076		-0.63338	-7.3363		-0.6365	-2.62325
-0.63813	-3.69849		-0.63628	-7.27218		-0.6663	-3.7171			-0.63693	-3.91129		-0.63359	-7.33643		-0.63677	-2.6231
-0.63873	-3.69854		-0.6369	-7.27287		-0.66646	-3.71542			-0.63742	-3.91073		-0.63219	-7.33638		-0.63704	-2.62369
-0.63887	-3.69909		-0.63705	-7.27775		-0.66661	-3.71652			-0.63755	-3.91127		-0.63219	-7.33709		-0.63611	-2.62274
-0.66809	-3.74537		-0.66556	-7.28611		-0.69623	-3.72908			-0.66762	-3.95123		-0.66301	-7.35665		-0.66641	-2.6261
-0.66809	-3.74843		-0.66638	-7.2863		-0.69644	-3.72905			-0.66772	-3.95255		-0.66337	-7.35666		-0.66688	-2.62536
-0.66873	-3.74839		-0.66657	-7.28693		-0.69666	-3.72943			-0.66794	-3.95382		-0.66337	-7.35602		-0.667	-2.62425
-0.66886	-3.74667		-0.66676	-7.2878		-0.69527	-3.72992			-0.66772	-3.95316		-0.66337	-7.35561		-0.667	-2.62319
-0.66899	-3.748		-0.66695	-7.29008		-0.69527	-3.72986			-0.66759	-3.95227		-0.66337	-7.35465		-0.667	-2.62259
-0.6969	-3.78196		-0.69661	-7.30072		-0.72619	-3.73394			-0.69723	-3.99986		-0.69341	-7.38092		-0.69684	-2.63071
-0.6969	-3.78482		-0.69699	-7.298		-0.72654	-3.73275			-0.69752	-4.00014		-0.69341	-7.37588		-0.69684	-2.6308
-0.6969	-3.78897		-0.69737	-7.29976		-0.7266	-3.73095			-0.69683	-3.99983		-0.69341	-7.37315		-0.69684	-2.62956
-0.69846	-3.79276		-0.6974	-7.30604		-0.7266	-3.72792			-0.6975	-3.99568		-0.69392	-7.37211		-0.69684	-2.62781
-0.69878	-3.79593		-0.6974	-7.31047		-0.7266	-3.7285			-0.69683	-3.99626		-0.69403	-7.3705		-0.69744	-2.62594
-0.72772	-3.83758		-0.72654	-7.33528		-0.7564	-3.73226			-0.72706	-4.04157		-0.72289	-7.38503		-0.72665	-2.6409
-0.72866	-3.83567		-0.72654	-7.33487		-0.75647	-3.73263			-0.72724	-4.03947		-0.72337	-7.38531		-0.72665	-2.64084
-0.72885	-3.83503		-0.72654	-7.33207		-0.75647	-3.73251			-0.72739	-4.03862		-0.72347	-7.38488		-0.72735	-2.64034
-0.72903	-3.83561		-0.72654	-7.32825		-0.75647	-3.73222			-0.72706	-4.03645		-0.72358	-7.38414		-0.72751	-2.63865
-0.72772	-3.83749		-0.72654	-7.32539		-0.75647	-3.73203			-0.72776	-4.03527		-0.72369	-7.38401		-0.72766	-2.63618
-0.75862	-3.87767		-0.75697	-7.33646		-0.7859	-3.73835			-0.75741	-4.07286		-0.75317	-7.39772		-0.75704	-2.64529
-0.75898	-3.88344		-0.75697	-7.33961		-0.7859	-3.73873			-0.75638	-4.06652		-0.75345	-7.39753		-0.75729	-2.64349
-0.75928	-3.88695		-0.75697	-7.34433		-0.7859	-3.73867			-0.75638	-4.06928		-0.75372	-7.3968		-0.75754	-2.64189
-0.75928	-3.88799		-0.75747	-7.34869		-0.7867	-3.73797			-0.75753	-4.06715		-0.75384	-7.39616		-0.75778	-2.64036
-0.75928	-3.88718		-0.75757	-7.35096		-0.78687	-3.73773			-0.75638	-4.06993		-0.75384	-7.39618		-0.75595	-2.63945
-0.78896	-3.90151		-0.78579	-7.35874		-0.8159	-3.74475			-0.78777	-4.10791		-0.78321	-7.41111		-0.78705	-2.6489
-0.78951	-3.90589		-0.78579	-7.35595		-0.81607	-3.74507			-0.78799	-4.10381		-0.78347	-7.41041		-0.78744	-2.65058
-0.78967	-3.90906		-0.78683	-7.3558		-0.81623	-3.74517			-0.78777	-4.11085		-0.78347	-7.40912		-0.78746	-2.65166
-0.78967	-3.91033		-0.78704	-7.35875		-0.81639	-3.74529			-0.78777	-4.10942		-0.78347	-7.4093		-0.78746	-2.65159
-0.78967	-3.90964		-0.78726	-7.36356		-0.81524	-3.7457			-0.78817	-4.10737		-0.78347	-7.40936		-0.78746	-2.65165
-0.81758	-3.93005		-0.81657	-7.38502		-0.84559	-3.74412			-0.81786	-4.13877		-0.81289	-7.4216		-0.81713	-2.64723
-0.81824	-3.9338		-0.81681	-7.38951		-0.846	-3.74372			-0.8166	-4.13924		-0.81289	-7.42115		-0.81713	-2.6484
-0.81891	-3.93829		-0.81705	-7.39166		-0.84622	-3.74346			-0.81776	-4.14015		-0.81289	-7.42096		-0.81713	-2.64969
-0.81922	-3.94237		-0.81549	-7.39088		-0.84622	-3.74344			-0.81804	-4.13903		-0.81324	-7.42083		-0.81713	-2.65071
-0.81922	-3.94392		-0.81549	-7.38837		-0.84622	-3.74486			-0.8166	-4.1255		-0.81331	-7.42082		-0.81776	-2.6523
-0.84925	-3.95527		-0.84685	-7.40569		-0.87398	-3.74908			-0.84755	-4.17037		-0.84179	-7.43223		-0.84651	-2.65611
-0.84952	-3.95405		-0.84717	-7.40193		-0.87464	-3.74941			-0.8479	-4.17157		-0.84284	-7.43133		-0.84651	-2.65828
-0.84952	-3.95429		-0.84717	-7.39825		-0.8753	-3.74962			-0.84755	-4.16994		-0.84308	-7.43031		-0.84758	-2.65816
-0.84952	-3.95626		-0.84717	-7.3947		-0.87071	-3.74973			-0.84803	-4.16896		-0.84333	-7.42955		-0.84781	-2.65788
-0.84952	-3.96015		-0.84717	-7.3923		-0.87071	-3.75036			-0.84816	-4.17114		-0.84358	-7.4289		-0.84803	-2.65741
-0.87892	-3.99116		-0.87703	-7.40889		-0.90529	-3.75476			-0.87716	-4.19701		-0.87196	-7.44123		-0.87703	-2.66428
-0.87892	-3.99281		-0.87703	-7.40868		-0.90572	-3.75576			-0.87721	-4.19806		-0.87228	-7.44298		-0.87733	-2.66421
-0.87892	-3.99464		-0.87703	-7.40813		-0.90572	-3.75734			-0.8778	-4.19802		-0.8726	-7.44379		-0.87762	-2.66441
-0.87946	-3.99542		-0.87703	-7.4082		-0.90572	-3.75793			-0.87721	-4.19547		-0.87292	-7.44302		-0.87792	-2.66352
-0.87958	-3.99545		-0.87724	-7.40894		-0.90572	-3.75719			-0.87777	-4.18864		-0.87064	-7.44264		-0.8757	-2.66154
-0.90785	-4.02074		-0.90566	-7.43169		-0.93443	-3.75706			-0.90687	-4.22202		-0.90187	-7.45416		-0.90599	-2.66463
-0.90882	-4.02308		-0.90566	-7.42851		-0.93443	-3.75619			-0.90731	-4.22437		-0.90231	-7.45342		-0.90639	-2.66513
-0.90905	-4.02391		-0.90642	-7.42486		-0.93443	-3.75671			-0.90623	-4.22776		-0.90243	-7.45237		-0.9068	-2.66627
-0.90928	-4.02488		-0.90658	-7.42156		-0.93443	-3.75622			-0.90717	-4.22603		-0.90243	-7.45156		-0.90688	-2.66698
-0.90951	-4.02653		-0.90674	-7.42043		-0.93499	-3.75597			-0.90623	-4.22706		-0.90243	-7.45109		-0.90688	-2.6669
-0.93794	-4.0484		-0.93437	-7.44114		-0.96318	-3.75842			-0.93587	-4.25689		-0.9312	-7.45671		-0.93587	-2.675
-0.93826	-4.04946		-0.93537	-7.44188		-0.96318	-3.75908			-0.93617	-4.25468		-0.9312	-7.45789		-0.93601	-2.67398
-0.93858	-4.04939		-0.93558	-7.44119		-0.96318	-3.75851			-0.93637	-4.25835		-0.9312	-7.4581		-0.93601	-2.67266
-0.93869	-4.04836		-0.9358	-7.43902		-0.96373	-3.7592			-0.93587	-4.25658		-0.9312	-7.45784		-0.93601	-2.67079
-0.93869	-4.04535		-0.93437	-7.43797		-0.96386	-3.75957			-0.93638	-4.25512		-0.93154	-7.45726		-0.93601	-2.66919
-0.96736	-4.06268		-0.96471	-7.42943		-0.99107	-3.76285			-0.96501	-4.27709		-0.96005	-7.47051		-0.96465	-2.6739
-0.96748	-4.06536		-0.96503	-7.42715		-0.99184	-3.76216			-0.96366	-4.27405		-0.96005	-7.47052		-0.96465	-2.67254
-0.96748	-4.06673		-0.96535	-7.42841		-0.99202	-3.76278			-0.96503	-4.2749		-0.96052	-7.47113		-0.96465	-2.67287
-0.96748	-4.06718		-0.9654	-7.43006		-0.99219	-3.76154			-0.96537	-4.27628		-0.96062	-7.47109		-0.96523	-2.673
-0.96748	-4.06691		-0.9654	-7.42973		-0.99237	-3.75433			-0.96366	-4.27774		-0.96073	-7.47079		-0.96535	-2.67472
-0.99568	-4.07885		-0.99273	-7.4511		-0.96471	-3.76748			-0.99349	-4.2994		-0.98846	-7.47976		-0.99257	-2.68232
-0.99568	-4.07788		-0.99316	-7.44765		-0.96461	-3.768			-0.99363	-4.29905		-0.98871	-7.47729		-0.99338	-2.68451
-0.99568	-4.07681		-0.99321	-7.44289		-0.9645	-3.76879			-0.99349	-4.29965		-0.98896	-7.47685		-0.99355	-2.68566
-0.99587	-4.07743		-0.99321	-7.43909		-0.9644	-3.76866			-0.9937	-4.30427		-0.98922	-7.47647		-0.99372	-2.68496
-0.99591	-4.07942		-0.99321	-7.43923		-0.96476	-3.76846			-0.99375	-4.29877		-0.98832	-7.47566		-0.99257	-2.68307
-0.9681	-4.06488		-0.96543	-7.43122		-0.9365	-3.76736			-0.96528	-4.28149		-0.96171	-7.46736		-0.96607	-2.67488
-0.9681	-4.06413		-0.96537	-7.43414		-0.93555	-3.76724			-0.96523	-4.2833		-0.96146	-7.46686		-0.96585	-2.6744
-0.96767	-4.06251		-0.96537	-7.43568		-0.93532	-3.76784			-0.96499	-4.28149		-0.96124	-7.46685		-0.96563	-2.67453
-0.96758	-4.06012		-0.96537	-7.43505		-0.93509	-3.76718			-0.96523	-4.28051		-0.96124	-7.46677		-0.96542	-2.67464
-0.96748	-4.05753		-0.96537	-7.43254		-0.93486	-3.7683			-0.96538	-4.28025		-0.96124	-7.46525		-0.96707	-2.67494
-0.9388	-4.04264		-0.93635	-7.43343		-0.90586	-3.77282			-0.93592	-4.25247		-0.93152	-7.45117		-0.93658	-2.67495
-0.93851	-4.04453		-0.93635	-7.43418		-0.90566	-3.77035			-0.93573	-4.25285		-0.93152	-7.45278		-0.93636	-2.67484
-0.93844	-4.04651		-0.93635	-7.4324		-0.90547	-3.76749			-0.93619	-4.25317		-0.93152	-7.45355		-0.93634	-2.67481
-0.93838	-4.04844		-0.93589	-7.4299		-0.90528	-3.76537			-0.936	-4.25204		-0.93152	-7.45356		-0.93634	-2.6752
-0.93831	-4.05186		-0.93579	-7.43115		-0.90665	-3.76495			-0.93619	-4.25085		-0.93152	-7.45314		-0.93634	-2.67637
-0.90903	-4.01411		-0.90713	-7.4103		-0.87636	-3.76744			-0.90653	-4.22819		-0.90218	-7.44812		-0.90661	-2.67055
-0.90891	-4.01322		-0.90648	-7.4142		-0.87613	-3.76417			-0.90616	-4.22297		-0.90218	-7.44736		-0.90661	-2.67004
-0.9088	-4.01228		-0.90634	-7.41752		-0.8759	-3.76249			-0.9059	-4.22652		-0.90218	-7.44662		-0.90661	-2.66987
-0.90876	-4.01143		-0.90619	-7.41873		-0.87582	-3.76278			-0.90653	-4.22573		-0.90213	-7.44603		-0.90661	-2.66844
-0.90876	-4.01153		-0.90713	-7.41756		-0.87582	-3.76552			-0.90619	-4.22617		-0.90212	-7.44493		-0.90652	-2.66759
-0.87924	-3.99394		-0.87705	-7.40608		-0.84593	-3.77372			-0.87656	-4.20387		-0.87348	-7.43266		-0.87724	-2.66526
-0.87917	-3.99165		-0.87688	-7.40182		-0.84552	-3.77184			-0.87734	-4.20236		-0.87287	-7.4319		-0.87724	-2.66609
-0.87917	-3.98887		-0.8767	-7.39956		-0.84545	-3.77103			-0.87681	-4.202		-0.87274	-7.43166		-0.87724	-2.66669
-0.87917	-3.98582		-0.87789	-7.39745		-0.84545	-3.77048			-0.87667	-4.20353		-0.87261	-7.43207		-0.87707	-2.66658
-0.87917	-3.98519		-0.87789	-7.39533		-0.84545	-3.77072			-0.87734	-4.2014		-0.87348	-7.43296		-0.87704	-2.66753
-0.84911	-3.9764		-0.84685	-7.39702		-0.81577	-3.75624			-0.84678	-4.17007		-0.84332	-7.42576		-0.84784	-2.66518
-0.84911	-3.97674		-0.8466	-7.39893		-0.81577	-3.75501			-0.84674	-4.16699		-0.8431	-7.42545		-0.84784	-2.66419
-0.84911	-3.97725		-0.8466	-7.39787		-0.81577	-3.75626			-0.84678	-4.16832		-0.84288	-7.42411		-0.84708	-2.66467
-0.84911	-3.97691		-0.8466	-7.39386		-0.81577	-3.75912			-0.8467	-4.16692		-0.84267	-7.42361		-0.84692	-2.66333
-0.84897	-3.97612		-0.8466	-7.38766		-0.81551	-3.76176			-0.84668	-4.16818		-0.84432	-7.42366		-0.84676	-2.66156
-0.81907	-3.95056		-0.81662	-7.39802		-0.78633	-3.76179			-0.81671	-4.1396		-0.81315	-7.41293		-0.81751	-2.65736
-0.81907	-3.94984		-0.81662	-7.39691		-0.78633	-3.76253			-0.81666	-4.13781		-0.81281	-7.41297		-0.81736	-2.65568
-0.81876	-3.94781		-0.81662	-7.39211		-0.7859	-3.76199			-0.8164	-4.14091		-0.81248	-7.41334		-0.8172	-2.6556
-0.8187	-3.94497		-0.81629	-7.38595		-0.7858	-3.76127			-0.81666	-4.1378		-0.81247	-7.41387		-0.81704	-2.65605
-0.81864	-3.94251		-0.81622	-7.38008		-0.7857	-3.76121			-0.81662	-4.13829		-0.81247	-7.41284		-0.81756	-2.6559
-0.78881	-3.91071		-0.78729	-7.35579		-0.75634	-3.75336			-0.78637	-4.11579		-0.78265	-7.40161		-0.7873	-2.65439
-0.78857	-3.90848		-0.78729	-7.35546		-0.75548	-3.75335			-0.78611	-4.10846		-0.78258	-7.40106		-0.78707	-2.65446
-0.78832	-3.90688		-0.78675	-7.3579		-0.75531	-3.75333			-0.78672	-4.11203		-0.78258	-7.40044		-0.78687	-2.65434
-0.78822	-3.90531		-0.78663	-7.36242		-0.75514	-3.75274			-0.78611	-4.1104		-0.78258	-7.39937		-0.78687	-2.65381
-0.78822	-3.90387		-0.7865	-7.36756		-0.75634	-3.75269			-0.78672	-4.11071		-0.78258	-7.39878		-0.78687	-2.6541
-0.75816	-3.86653		-0.75632	-7.33661		-0.72571	-3.7397			-0.75645	-4.07675		-0.75308	-7.38682		-0.7568	-2.64846
-0.75807	-3.8631		-0.75612	-7.3306		-0.72541	-3.73856			-0.75626	-4.07387		-0.75308	-7.38566		-0.75646	-2.64622
-0.75807	-3.86255		-0.75593	-7.3302		-0.72511	-3.73837			-0.75611	-4.07201		-0.75261	-7.38357		-0.75646	-2.64444
-0.75807	-3.86474		-0.75722	-7.33229		-0.72715	-3.73917			-0.75645	-4.0749		-0.75249	-7.38246		-0.75646	-2.64396
-0.75807	-3.86858		-0.75722	-7.33241		-0.72715	-3.73992			-0.75592	-4.07199		-0.75237	-7.38183		-0.75646	-2.64347
-0.72847	-3.8411		-0.7263	-7.30877		-0.6955	-3.74785			-0.72609	-4.03842		-0.72344	-7.36972		-0.72641	-2.65108
-0.72847	-3.84		-0.72595	-7.31303		-0.69528	-3.74727			-0.72695	-4.03847		-0.72269	-7.36878		-0.72641	-2.65143
-0.72847	-3.8395		-0.72562	-7.31851		-0.69528	-3.74576			-0.72593	-4.03649		-0.72254	-7.36744		-0.72641	-2.65173
-0.72786	-3.83855		-0.72562	-7.31784		-0.69528	-3.7432			-0.72567	-4.03901		-0.72238	-7.36648		-0.72641	-2.65065
-0.72774	-3.83759		-0.72562	-7.31494		-0.69528	-3.74154			-0.72695	-4.03837		-0.72344	-7.36571		-0.7261	-2.64993
-0.69868	-3.8087		-0.69579	-7.28661		-0.66542	-3.74355			-0.69597	-3.99974		-0.69274	-7.35644		-0.69673	-2.64487
-0.69821	-3.8055		-0.69579	-7.28722		-0.66542	-3.74433			-0.69592	-3.99712		-0.69246	-7.35556		-0.69673	-2.64664
-0.69811	-3.80282		-0.69579	-7.28796		-0.66542	-3.74552			-0.69597	-3.99482		-0.69225	-7.35456		-0.69647	-2.6473
-0.69801	-3.8009		-0.69579	-7.28925		-0.66492	-3.74729			-0.69563	-3.99806		-0.69225	-7.35361		-0.69641	-2.64657
-0.69868	-3.80061		-0.69575	-7.29014		-0.6648	-3.74736			-0.69554	-3.99869		-0.69225	-7.3523		-0.69634	-2.64566
-0.66802	-3.76804		-0.66606	-7.2532		-0.63572	-3.73285			-0.66615	-3.95819		-0.66235	-7.33922		-0.66729	-2.6315
-0.66773	-3.76903		-0.66606	-7.25173		-0.63496	-3.73053			-0.66603	-3.95527		-0.66235	-7.33837		-0.66636	-2.63039
-0.66746	-3.77111		-0.66606	-7.25186		-0.63479	-3.72836			-0.66595	-3.95538		-0.66235	-7.33787		-0.66617	-2.63078
-0.66746	-3.77301		-0.66567	-7.25398		-0.63462	-3.72753			-0.66603	-3.95265		-0.66235	-7.33776		-0.66597	-2.63137
-0.66746	-3.7735		-0.66558	-7.25598		-0.63445	-3.72486			-0.66591	-3.95431		-0.66223	-7.33638		-0.66729	-2.63303
-0.63768	-3.71731		-0.63615	-7.22652		-0.605	-3.73532			-0.63591	-3.91203		-0.63321	-7.32557		-0.63654	-2.63658
-0.63768	-3.71716		-0.63615	-7.22594		-0.60475	-3.73794			-0.63561	-3.91113		-0.63321	-7.32327		-0.63633	-2.63589
-0.63768	-3.71588		-0.63576	-7.22632		-0.6045	-3.73826			-0.63631	-3.90815		-0.63321	-7.32173		-0.63621	-2.63575
-0.63768	-3.71335		-0.63568	-7.2283		-0.60445	-3.73701			-0.63587	-3.89348		-0.63275	-7.32146		-0.63621	-2.63457
-0.6375	-3.71221		-0.63559	-7.23064		-0.60445	-3.73416			-0.63631	-3.90314		-0.63264	-7.32183		-0.63621	-2.63451
-0.60788	-3.68676		-0.60579	-7.20214		-0.57471	-3.7265			-0.60575	-3.86007		-0.60335	-7.30694		-0.60618	-2.62765
-0.60788	-3.68349		-0.60566	-7.19957		-0.57457	-3.72281			-0.60556	-3.8587		-0.60335	-7.30711		-0.60618	-2.62826
-0.60788	-3.67851		-0.60553	-7.19797		-0.57457	-3.71849			-0.6054	-3.85992		-0.60287	-7.30767		-0.60618	-2.62714
-0.60747	-3.67441		-0.6054	-7.19977		-0.57457	-3.71546			-0.60575	-3.85923		-0.60275	-7.30863		-0.60618	-2.62815
-0.60739	-3.67268		-0.60635	-7.202		-0.57457	-3.71312			-0.60555	-3.8571		-0.60263	-7.30554		-0.60586	-2.62813
-0.5781	-3.63037		-0.57541	-7.1902		-0.54526	-3.71308			-0.57557	-3.8066		-0.57295	-7.28652		-0.57622	-2.62385
-0.57725	-3.63171		-0.57515	-7.19297		-0.54526	-3.71035			-0.57655	-3.80422		-0.57278	-7.28434		-0.57622	-2.62405
-0.57707	-3.6335		-0.57515	-7.19407		-0.54526	-3.7096			-0.57574	-3.8036		-0.57261	-7.28157		-0.57622	-2.62362
-0.57689	-3.63281		-0.57515	-7.19439		-0.54526	-3.71092			-0.57552	-3.80246		-0.57244	-7.27969		-0.57593	-2.6235
-0.5781	-3.63108		-0.57515	-7.19383		-0.54467	-3.71456			-0.57655	-3.80323		-0.57363	-7.28095		-0.57587	-2.62358
-0.54736	-3.56516		-0.54572	-7.15906		-0.51578	-3.70896			-0.54588	-3.74464		-0.54319	-7.2651		-0.54688	-2.61271
-0.54709	-3.56254		-0.54572	-7.16213		-0.51578	-3.70619			-0.54543	-3.74339		-0.54292	-7.26522		-0.54629	-2.61325
-0.54682	-3.55841		-0.54572	-7.16152		-0.51578	-3.70316			-0.54588	-3.74301		-0.5427	-7.26447		-0.54615	-2.61359
-0.54681	-3.55585		-0.54572	-7.1583		-0.51498	-3.70288			-0.54558	-3.74125		-0.5427	-7.26398		-0.54601	-2.61361
-0.54681	-3.55316		-0.54532	-7.15692		-0.5148	-3.70482			-0.54549	-3.74134		-0.5427	-7.26438		-0.54588	-2.61308
-0.5175	-3.5172		-0.51617	-7.13277		-0.48601	-3.69434			-0.51562	-3.68287		-0.51436	-7.24289		-0.51666	-2.60485
-0.51703	-3.51675		-0.51617	-7.1258		-0.48555	-3.69308			-0.51698	-3.67632		-0.51388	-7.24024		-0.51636	-2.60453
-0.51703	-3.51655		-0.5156	-7.12202		-0.48544	-3.69338			-0.51545	-3.67102		-0.51341	-7.23766		-0.51605	-2.60461
-0.51703	-3.51591		-0.51546	-7.12108		-0.48534	-3.69494			-0.51698	-3.6716		-0.51658	-7.23717		-0.51815	-2.60444
-0.51703	-3.51374		-0.51532	-7.12416		-0.48523	-3.69708			-0.51698	-3.67272		-0.51658	-7.23794		-0.51815	-2.60393
-0.48762	-3.4414		-0.48698	-7.10662		-0.45564	-3.69199			-0.48622	-3.60794		-0.48404	-7.21419		-0.48694	-2.59879
-0.48755	-3.4382		-0.48624	-7.10184		-0.45541	-3.69053			-0.48564	-3.60508		-0.48363	-7.21364		-0.48654	-2.5985
-0.48755	-3.43661		-0.48606	-7.09805		-0.45518	-3.68813			-0.48622	-3.60405		-0.48334	-7.21279		-0.48635	-2.5981
-0.48755	-3.43646		-0.48588	-7.09505		-0.45517	-3.68818			-0.48555	-3.60185		-0.48334	-7.21352		-0.48635	-2.59707
-0.48755	-3.43682		-0.4857	-7.09297		-0.45517	-3.68988			-0.48622	-3.60386		-0.48334	-7.21291		-0.48635	-2.59708
-0.45747	-3.36792		-0.45642	-7.0626		-0.42617	-3.67016			-0.45605	-3.52102		-0.45398	-7.18207		-0.45653	-2.58921
-0.45747	-3.36358		-0.45625	-7.05961		-0.42575	-3.66998			-0.45582	-3.52148		-0.45367	-7.1814		-0.45638	-2.58773
-0.45747	-3.35922		-0.45608	-7.0567		-0.42569	-3.67276			-0.45564	-3.52016		-0.45367	-7.18019		-0.45638	-2.58656
-0.45747	-3.35499		-0.45591	-7.05326		-0.42569	-3.67636			-0.45605	-3.51686		-0.45367	-7.17977		-0.45638	-2.58712
-0.45713	-3.35302		-0.45712	-7.05341		-0.42569	-3.67935			-0.45572	-3.51937		-0.45367	-7.18022		-0.45638	-2.5874
-0.42801	-3.28105		-0.42655	-7.02098		-0.3965	-3.66074			-0.42607	-3.43336		-0.42438	-7.15028		-0.42701	-2.57615
-0.42801	-3.27774		-0.42629	-7.02039		-0.3963	-3.65855			-0.42689	-3.42876		-0.42438	-7.14948		-0.42701	-2.57733
-0.42801	-3.27542		-0.42618	-7.01962		-0.3963	-3.65932			-0.42689	-3.42738		-0.42438	-7.14813		-0.42701	-2.5781
-0.42745	-3.27615		-0.42618	-7.0183		-0.3963	-3.66096			-0.42515	-3.42638		-0.42438	-7.14708		-0.42674	-2.57751
-0.42734	-3.2789		-0.42618	-7.01639		-0.3963	-3.66505			-0.42689	-3.42735		-0.42392	-7.1475		-0.42668	-2.57819
-0.39866	-3.1998		-0.39666	-6.98602		-0.36681	-3.66339			-0.39628	-3.3332		-0.39488	-7.11009		-0.39784	-2.56741
-0.39866	-3.19678		-0.39666	-6.9876		-0.36681	-3.66476			-0.39573	-3.33095		-0.39488	-7.10951		-0.39784	-2.56701
-0.39802	-3.19637		-0.39666	-6.98767		-0.36681	-3.66443			-0.39628	-3.33119		-0.39488	-7.1094		-0.3971	-2.56706
-0.39788	-3.19766		-0.39666	-6.98944		-0.36681	-3.66278			-0.39628	-3.33106		-0.39431	-7.10848		-0.39693	-2.56699
-0.39775	-3.19843		-0.39631	-6.99035		-0.36633	-3.66006			-0.3955	-3.32995		-0.39418	-7.10785		-0.39677	-2.56723
-0.36838	-3.09784		-0.36688	-6.9191		-0.33711	-3.64605			-0.36695	-3.22542		-0.36524	-7.06634		-0.36845	-2.55399
-0.36818	-3.09449		-0.36688	-6.92121		-0.33711	-3.6444			-0.36808	-3.2238		-0.36524	-7.06499		-0.3674	-2.55296
-0.36798	-3.09335		-0.36668	-6.92283		-0.33657	-3.64201			-0.36698	-3.22203		-0.36484	-7.06449		-0.36717	-2.55237
-0.36778	-3.09278		-0.36664	-6.92223		-0.33645	-3.6387			-0.36808	-3.22218		-0.36474	-7.06417		-0.36694	-2.55276
-0.36848	-3.09312		-0.3666	-6.91999		-0.33633	-3.63771			-0.36808	-3.22295		-0.36464	-7.06333		-0.36845	-2.55115
-0.33868	-2.99423		-0.33807	-6.86927		-0.30835	-3.61971			-0.3372	-3.10327		-0.33617	-7.01805		-0.33806	-2.53869
-0.33837	-2.99057		-0.33735	-6.86548		-0.30759	-3.62059			-0.33705	-3.09962		-0.33617	-7.01644		-0.33784	-2.53894
-0.33806	-2.98667		-0.3372	-6.86592		-0.30742	-3.62361			-0.3372	-3.09825		-0.33536	-7.01489		-0.33761	-2.53902
-0.33794	-2.98281		-0.33704	-6.86616		-0.30725	-3.62649			-0.33668	-3.09725		-0.33519	-7.01414		-0.33738	-2.53781
-0.33794	-2.98026		-0.33807	-6.86509		-0.30708	-3.62755			-0.33655	-3.09711		-0.33502	-7.01411		-0.33906	-2.53574
-0.30912	-2.86477		-0.3077	-6.80925		-0.27754	-3.60808			-0.30727	-2.96568		-0.30698	-6.9636		-0.30799	-2.51535
-0.30874	-2.86302		-0.30748	-6.80483		-0.27728	-3.6036			-0.30722	-2.96339		-0.30605	-6.96157		-0.30767	-2.51495
-0.30852	-2.86297		-0.30729	-6.80128		-0.27702	-3.60032			-0.30737	-2.96288		-0.30585	-6.96055		-0.30761	-2.51459
-0.30852	-2.86255		-0.30729	-6.7997		-0.27695	-3.59975			-0.30722	-2.96368		-0.30565	-6.96063		-0.30761	-2.51431
-0.30852	-2.86037		-0.30729	-6.79839		-0.27695	-3.60248			-0.30723	-2.9617		-0.30698	-6.95963		-0.30761	-2.51434
-0.27925	-2.72911		-0.27808	-6.72095		-0.24734	-3.57551			-0.27784	-2.80043		-0.27643	-6.89512		-0.27829	-2.50067
-0.27891	-2.72591		-0.27762	-6.72276		-0.24731	-3.57595			-0.27741	-2.79835		-0.27616	-6.89067		-0.27809	-2.5009
-0.27891	-2.72487		-0.27758	-6.72501		-0.24731	-3.5789			-0.27849	-2.79965		-0.2759	-6.88913		-0.27809	-2.50133
-0.27891	-2.72416		-0.27758	-6.72599		-0.24731	-3.58225			-0.27761	-2.80037		-0.27763	-6.88668		-0.27809	-2.50182
-0.27891	-2.72258		-0.27758	-6.72424		-0.24731	-3.58386			-0.27849	-2.80092		-0.27763	-6.88424		-0.27809	-2.50123
-0.24888	-2.57495		-0.24769	-6.61614		-0.21828	-3.55267			-0.24783	-2.63		-0.24634	-6.81575		-0.24848	-2.47679
-0.24884	-2.57374		-0.24769	-6.61714		-0.21828	-3.54991			-0.2476	-2.62626		-0.24597	-6.81333		-0.24848	-2.47588
-0.24884	-2.57026		-0.24769	-6.6173		-0.21828	-3.54843			-0.24743	-2.6253		-0.24597	-6.81137		-0.24848	-2.47586
-0.24884	-2.56749		-0.24769	-6.6162		-0.21828	-3.5491			-0.24783	-2.6255		-0.24597	-6.81037		-0.24848	-2.47533
-0.24884	-2.56536		-0.24753	-6.61329		-0.21775	-3.55156			-0.24752	-2.6252		-0.24597	-6.80905		-0.2481	-2.47431
-0.21936	-2.40338		-0.21819	-6.5038		-0.18824	-3.51171			-0.21809	-2.42942		-0.21683	-6.71771		-0.21875	-2.45238
-0.21936	-2.39938		-0.21819	-6.50169		-0.18824	-3.51249			-0.21922	-2.42517		-0.21683	-6.71577		-0.21875	-2.45124
-0.21936	-2.39593		-0.21791	-6.50003		-0.18824	-3.51284			-0.21813	-2.42405		-0.21683	-6.71489		-0.21875	-2.44973
-0.21936	-2.39244		-0.21784	-6.49909		-0.18774	-3.51039			-0.21785	-2.42146		-0.21653	-6.71297		-0.21822	-2.45017
-0.21886	-2.38963		-0.21778	-6.49994		-0.18764	-3.50758			-0.21922	-2.42116		-0.21645	-6.7121		-0.21811	-2.44981
-0.18919	-2.19697		-0.18817	-6.36887		-0.159	-3.45821			-0.18825	-2.19771		-0.18781	-6.5894		-0.18922	-2.41759
-0.18919	-2.19237		-0.18794	-6.36714		-0.159	-3.45768			-0.18797	-2.19398		-0.18781	-6.58675		-0.18922	-2.41719
-0.18919	-2.18875		-0.18771	-6.36639		-0.1582	-3.45764			-0.18825	-2.19194		-0.18701	-6.5847		-0.18847	-2.41593
-0.1887	-2.18657		-0.18748	-6.36694		-0.15804	-3.45706			-0.18806	-2.19015		-0.18682	-6.58262		-0.1883	-2.41467
-0.1886	-2.18567		-0.18918	-6.3673		-0.15788	-3.45488			-0.18801	-2.18905		-0.18663	-6.58142		-0.18813	-2.41445
-0.15985	-1.96799		-0.15879	-6.18579		-0.12877	-3.3814			-0.1586	-1.93644		-0.1586	-6.43187		-0.15903	-2.37118
-0.15985	-1.96398		-0.15845	-6.18304		-0.12855	-3.38027			-0.1585	-1.92897		-0.15765	-6.42796		-0.15892	-2.37001
-0.1591	-1.96144		-0.15812	-6.18172		-0.12834	-3.37826			-0.15832	-1.92551		-0.15743	-6.42483		-0.15881	-2.36869
-0.15894	-1.95933		-0.15809	-6.18155		-0.12978	-3.3762			-0.1585	-1.92597		-0.15721	-6.42277		-0.1587	-2.3676
-0.15879	-1.95685		-0.15809	-6.18126		-0.12978	-3.37639			-0.15833	-1.9266		-0.15699	-6.42216		-0.15949	-2.36707
-0.12945	-1.69664		-0.12809	-5.92997		-0.09886	-3.26067			-0.12866	-1.6412		-0.12798	-6.20184		-0.12943	-2.30789
-0.12926	-1.69244		-0.12809	-5.92556		-0.09856	-3.26009			-0.12835	-1.63327		-0.12777	-6.19612		-0.12916	-2.30615
-0.12906	-1.69051		-0.12809	-5.92215		-0.09856	-3.25988			-0.12907	-1.63151		-0.12756	-6.19191		-0.12889	-2.30598
-0.13039	-1.68796		-0.12809	-5.91927		-0.09856	-3.25771			-0.12854	-1.63103		-0.1275	-6.19018		-0.13079	-2.30502
-0.13039	-1.68656		-0.12789	-5.91738		-0.09856	-3.25567			-0.12907	-1.63079		-0.1275	-6.18866		-0.13079	-2.30598
-0.09944	-1.38484		-0.09859	-5.5757		-0.08865	-3.20256			-0.09838	-1.30569		-0.09756	-5.86357		-0.09881	-2.21164
-0.09917	-1.37933		-0.09859	-5.56795		-0.08854	-3.20231			-0.09834	-1.29932		-0.09745	-5.85529		-0.09858	-2.20985
-0.09917	-1.37503		-0.09859	-5.56238		-0.08842	-3.19982			-0.0983	-1.29778		-0.09745	-5.84666		-0.09858	-2.20853
-0.09917	-1.37195		-0.09804	-5.55933		-0.0892	-3.19661			-0.09838	-1.29663		-0.09745	-5.84152		-0.09858	-2.20777
-0.09917	-1.37011		-0.09793	-5.55906		-0.0892	-3.19283			-0.0981	-1.29504		-0.09745	-5.84306		-0.09858	-2.20678
-0.08904	-1.25849		-0.08797	-5.40376		-0.07857	-3.13303			-0.08858	-1.18163		-0.08762	-5.72255		-0.08875	-2.16556
-0.08894	-1.25518		-0.08797	-5.39961		-0.07857	-3.12879			-0.0885	-1.17828		-0.08745	-5.72077		-0.08865	-2.16554
-0.08883	-1.25211		-0.08797	-5.39566		-0.07833	-3.1252			-0.08858	-1.17664		-0.0874	-5.71894		-0.08855	-2.16509
-0.08953	-1.25029		-0.08797	-5.39235		-0.07828	-3.12222			-0.08822	-1.17526		-0.0874	-5.71682		-0.08924	-2.16413
-0.08953	-1.24938		-0.0879	-5.39108		-0.07823	-3.12271			-0.08813	-1.17463		-0.0874	-5.7147		-0.08924	-2.16392
-0.07913	-1.1347		-0.07819	-5.21437		-0.06835	-3.0487			-0.07845	-1.05404		-0.07772	-5.54977		-0.07918	-2.11343
-0.07871	-1.13222		-0.07815	-5.20945		-0.06835	-3.04621			-0.07832	-1.05136		-0.07756	-5.54487		-0.07918	-2.1125
-0.07862	-1.12967		-0.07815	-5.20548		-0.06835	-3.04602			-0.07862	-1.05044		-0.0774	-5.54088		-0.07876	-2.11172
-0.07852	-1.12744		-0.07815	-5.20212		-0.06835	-3.04529			-0.07827	-1.04953		-0.07724	-5.53741		-0.07868	-2.11058
-0.07842	-1.12664		-0.07815	-5.19931		-0.06808	-3.04209			-0.07862	-1.04957		-0.07836	-5.53498		-0.07859	-2.1099
-0.06879	-1.01016		-0.06839	-4.9932		-0.05874	-2.94222			-0.06846	-0.92893		-0.06771	-5.33583		-0.06873	-2.04884
-0.06879	-1.00716		-0.06831	-4.98703		-0.05859	-2.93723			-0.06894	-0.92573		-0.06771	-5.33097		-0.06873	-2.0465
-0.06879	-1.00474		-0.06822	-4.9827		-0.05852	-2.93491			-0.06894	-0.92412		-0.06738	-5.32689		-0.06873	-2.04477
-0.0686	-1.00271		-0.06818	-4.97955		-0.05852	-2.93432			-0.06852	-0.92252		-0.06731	-5.32396		-0.06873	-2.04352
-0.06855	-1.00043		-0.06818	-4.97861		-0.05852	-2.93417			-0.06894	-0.92324		-0.06725	-5.32305		-0.06864	-2.04269
-0.05888	-0.87637		-0.05853	-4.71989		-0.04876	-2.80118			-0.05881	-0.79821		-0.05807	-5.07402		-0.05872	-1.96717
-0.0587	-0.87366		-0.05809	-4.71342		-0.04865	-2.79967			-0.05932	-0.79436		-0.05807	-5.06809		-0.05853	-1.96499
-0.0587	-0.87177		-0.058	-4.70852		-0.04855	-2.79687			-0.05856	-0.79248		-0.05807	-5.06306		-0.05847	-1.96334
-0.0587	-0.87095		-0.05791	-4.70493		-0.04844	-2.79269			-0.05932	-0.79157		-0.0578	-5.05997		-0.05847	-1.96242
-0.0587	-0.86998		-0.05853	-4.70268		-0.04919	-2.78932			-0.05932	-0.79084		-0.05774	-5.05726		-0.05847	-1.96092
-0.04903	-0.73748		-0.04826	-4.38995		-0.0384	-2.60775			-0.04862	-0.66218		-0.04784	-4.75684		-0.04873	-1.8552
-0.04888	-0.73391		-0.04826	-4.38236		-0.0384	-2.60319			-0.04859	-0.65801		-0.04764	-4.74581		-0.0486	-1.85322
-0.04872	-0.7307		-0.04811	-4.37639		-0.0384	-2.59875			-0.04845	-0.65738		-0.04764	-4.73693		-0.04846	-1.85201
-0.04976	-0.72829		-0.04807	-4.37064		-0.03804	-2.59612			-0.04859	-0.65646		-0.04764	-4.73036		-0.0489	-1.85085
-0.04976	-0.72675		-0.04804	-4.36557		-0.03797	-2.59581			-0.04816	-0.65417		-0.04764	-4.72544		-0.0489	-1.85013
-0.03909	-0.5877		-0.03817	-3.94999		-0.02832	-2.36723			-0.03803	-0.5204		-0.03756	-4.30536		-0.03876	-1.70643
-0.03909	-0.5836		-0.03817	-3.93914		-0.02832	-2.36159			-0.03799	-0.51638		-0.03736	-4.29403		-0.03848	-1.70244
-0.03854	-0.57996		-0.03817	-3.93074		-0.02832	-2.3567			-0.03795	-0.51405		-0.03718	-4.28549		-0.03843	-1.69926
-0.03841	-0.57755		-0.03792	-3.92411		-0.02832	-2.34977			-0.03803	-0.51295		-0.03718	-4.27862		-0.03837	-1.69751
-0.03828	-0.57606		-0.03786	-3.91889		-0.02814	-2.34335			-0.03776	-0.51199		-0.03718	-4.27297		-0.03876	-1.6957
-0.02902	-0.44054		-0.02852	-3.41347		-0.01872	-1.98803			-0.02848	-0.38466		-0.02884	-3.75739		-0.02908	-1.51132
-0.02902	-0.43656		-0.02834	-3.39699		-0.01856	-1.97784			-0.02828	-0.37932		-0.02806	-3.73807		-0.02908	-1.50579
-0.02902	-0.43328		-0.02834	-3.38264		-0.01856	-1.96797			-0.02848	-0.37737		-0.0279	-3.72248		-0.02908	-1.50117
-0.02902	-0.43076		-0.02834	-3.3714		-0.01856	-1.95849			-0.02813	-0.37527		-0.02773	-3.71024		-0.02856	-1.49713
-0.02877	-0.42946		-0.02834	-3.36397		-0.01856	-1.94993			-0.02804	-0.37518		-0.02884	-3.69971		-0.02845	-1.49445
-0.01907	-0.28699		-0.01851	-2.63732		-0.0089	-1.37294			-0.01854	-0.24252		-0.01836	-2.92772		-0.01874	-1.21455
-0.01889	-0.28316		-0.01833	-2.61242		-0.00864	-1.34596			-0.01847	-0.23749		-0.01836	-2.89885		-0.01863	-1.20389
-0.01876	-0.28041		-0.01816	-2.59208		-0.00839	-1.32245			-0.01865	-0.23511		-0.01836	-2.87437		-0.01863	-1.19631
-0.01876	-0.27791		-0.01932	-2.57535		-0.00837	-1.30403			-0.018	-0.23314		-0.0179	-2.85416		-0.01863	-1.19025
-0.01876	-0.2753		-0.01932	-2.56155		-0.00837	-1.28962			-0.01865	-0.23231		-0.01781	-2.83855		-0.01863	-1.18534
-0.00923	-0.12958		-0.00934	-1.48933		0.000611756	0.26628			-0.00838	-0.09824		-0.00817	-1.59557		-0.00901	-0.71963
-0.00906	-0.12628		-0.00847	-1.44838		0.000817064	0.32762			-0.00842	-0.09481		-0.00817	-1.55611		-0.00887	-0.70545
-0.00891	-0.12364		-0.00829	-1.41545		0.00102	0.38104			-0.00846	-0.09208		-0.00817	-1.52297		-0.00887	-0.69387
-0.00891	-0.12135		-0.0081	-1.38777		0.00123	0.42137			-0.00838	-0.09138		-0.00795	-1.49635		-0.00887	-0.68448
-0.00891	-0.11972		-0.00934	-1.36537		0.000475465	0.45272			-0.00805	-0.09104		-0.0079	-1.47479		-0.00887	-0.67707
0.000368202	0.01689		0.000550353	0.26882		0.01105	1.56095			0.000644487	0.03403		0.001	0.28692		0.000627855	0.13059
0.000527708	0.02128		0.000550353	0.32223		0.01127	1.58343			0.00114	0.04007		0.001	0.34579		0.000842546	0.15809
0.000687534	0.02434		0.00106	0.36555		0.01131	1.60013			0.000644487	0.04387					0.000997554	0.18078
-0.000367858	0.0269		0.00118	0.40048		0.01131	1.61421			0.00101	0.04615					0.000997554	0.19918
-0.000367858	0.0293		0.00129	0.42737		0.01131	1.62627			0.00111	0.04754					0.000997554	0.21338
0.01098	0.18441		0.01093	1.88564		0.02099	2.10424			0.01089	0.18776					0.01086	0.94516
0.01099	0.18812		0.01114	1.91426		0.02116	2.11441			0.01141	0.19127					0.01086	0.95728
0.01099	0.19124		0.01135	1.9377		0.02116	2.12259			0.01089	0.19358					0.01086	0.96725
0.01099	0.19356		0.01136	1.95647		0.02116	2.12881			0.01135	0.19538					0.01118	0.97549
0.01099	0.19472		0.01136	1.9712		0.02116	2.13352			0.01146	0.19607					0.01126	0.98187
0.0212	0.33851		0.02077	2.89187		0.03121	2.43848			0.02123	0.33063					0.02084	1.35607
0.0212	0.3415		0.0209	2.91205		0.03142	2.44689			0.02125	0.33368					0.02084	1.36374
0.0212	0.34422		0.02103	2.92836		0.03145	2.45368			0.02154	0.33636					0.02084	1.36982
0.0212	0.34701		0.02103	2.94158		0.03145	2.45971			0.02125	0.3373					0.02121	1.37455
0.02149	0.34879		0.02103	2.9521		0.03145	2.46404			0.02168	0.33786					0.0213	1.37831
0.031	0.49303		0.03072	3.59689		0.04092	2.6564			0.03134	0.47399					0.03079	1.619
0.03108	0.49684		0.03088	3.61061		0.04111	2.66488			0.03162	0.47735					0.03079	1.62346
0.03108	0.49982		0.03099	3.62186		0.0413	2.67196			0.03095	0.47878					0.03079	1.62795
0.03108	0.50254		0.03099	3.63116		0.04135	2.67752			0.03149	0.47957					0.03079	1.63209
0.03108	0.5043		0.03099	3.639		0.04135	2.68143			0.03095	0.48101					0.03135	1.6346
0.04082	0.63465		0.04085	4.10431		0.05142	2.84122			0.04089	0.6062					0.04092	1.8058
0.04102	0.63804		0.04099	4.11402		0.05157	2.84423			0.04028	0.61161					0.04092	1.80971
0.04122	0.64136		0.04112	4.12219		0.05171	2.84658			0.04107	0.61456					0.04092	1.81245
0.04129	0.6448		0.04021	4.1289		0.05186	2.84822			0.04127	0.6162					0.04092	1.81474
0.04129	0.64757		0.04021	4.13346		0.05083	2.84864			0.04028	0.61805					0.0413	1.81629
0.05083	0.79021		0.05078	4.51392		0.06142	2.96939			0.05152	0.74948					0.05134	1.94462
0.0515	0.79354		0.05121	4.52062		0.06185	2.97276			0.05162	0.75486					0.05155	1.94607
0.05163	0.79664		0.0513	4.52633		0.06195	2.97629			0.05161	0.75735					0.05155	1.94761
0.05176	0.79919		0.05139	4.5317		0.06205	2.9796			0.05162	0.75816					0.05155	1.95001
0.05083	0.80019		0.05078	4.53605		0.06215	2.98097			0.05197	0.76011					0.05155	1.95122
0.06173	0.93286		0.06141	4.8279		0.0716	3.0757			0.06189	0.88651					0.06144	2.04499
0.06173	0.93596		0.06141	4.83542		0.0716	3.07767			0.062	0.89047					0.06161	2.04641
0.06194	0.93839		0.06179	4.84161		0.07175	3.07927			0.06209	0.89397					0.06177	2.04802
0.06199	0.9405		0.06187	4.84522		0.07179	3.08022			0.06189	0.89485					0.06193	2.04985
0.06203	0.94226		0.06195	4.84832		0.07182	3.08211			0.06213	0.89587					0.06135	2.0516
0.07166	1.06483		0.07126	5.07867		0.08168	3.13497			0.07164	1.01485					0.07144	2.12222
0.07166	1.06806		0.07126	5.08328		0.08168	3.13606			0.07168	1.01941					0.07144	2.12386
0.07166	1.07064		0.07126	5.08702		0.08168	3.13891			0.07164	1.02107					0.07175	2.12533
0.07184	1.07289		0.07171	5.09076		0.08168	3.14348			0.07199	1.02132					0.07182	2.12686
0.07188	1.07438		0.07181	5.09347		0.08168	3.14811			0.07208	1.02335					0.07189	2.12788
0.08177	1.19178		0.08151	5.29011		0.09178	3.21921			0.08164	1.1404					0.08145	2.18535
0.08177	1.19425		0.08151	5.29464		0.09197	3.22096			0.08174	1.14475					0.08145	2.18692
0.08177	1.19545		0.08151	5.2986		0.09202	3.22221			0.08151	1.14747					0.08145	2.18819
0.08177	1.19607		0.08151	5.30074		0.09202	3.2224			0.08184	1.14852					0.08168	2.18931
0.08202	1.19704		0.08161	5.30062		0.09202	3.22293			0.08151	1.14775					0.08173	2.19009
0.09186	1.30681		0.09139	5.45992		0.1007	3.24945			0.09156	1.26562					0.09192	2.24049
0.09195	1.30981		0.09142	5.46537		0.10152	3.25017			0.09125	1.26938					0.09192	2.24273
0.09195	1.31199		0.09142	5.47036		0.10169	3.25124			0.09165	1.27063					0.09192	2.24344
0.09195	1.31303		0.09142	5.47339		0.10186	3.25327			0.09176	1.27171					0.09192	2.24302
0.09195	1.31378		0.09142	5.47492		0.1007	3.25404			0.09125	1.27062					0.09195	2.24241
0.10173	1.42105		0.10148	5.6093		0.10225	3.26759			0.10173	1.38178					0.10189	2.27968
0.10186	1.42345		0.10164	5.61405		0.10225	3.27145			0.10185	1.38376					0.10199	2.28066
0.10196	1.42499		0.10179	5.61616		0.10225	3.27524			0.10183	1.38624					0.10199	2.28083
0.10196	1.42588		0.10187	5.61585		0.10221	3.27785			0.10185	1.38692					0.10199	2.2805
0.10196	1.42625		0.10187	5.61554		0.10221	3.27926			0.10181	1.38598					0.10199	2.28052
0.10208	1.43368		0.10188	5.62848		0.13059	3.38172			0.1017	1.38464					0.10226	2.28648
0.10208	1.43384		0.10192	5.62698		0.13077	3.38326			0.10187	1.38523					0.10228	2.28497
0.10209	1.43388		0.10195	5.62582		0.13095	3.384			0.10201	1.38568					0.10229	2.28231
0.10209	1.43413		0.10198	5.62512		0.13112	3.38406			0.1017	1.38639					0.10218	2.28118
0.10205	1.43464		0.10187	5.62566		0.12987	3.38405			0.10185	1.38598					0.10218	2.2809
0.13118	1.72055		0.13116	5.95301		0.1604	3.45274			0.13133	1.70313					0.13116	2.36969
0.13155	1.72506		0.13157	5.95768		0.1607	3.45408			0.13037	1.70835					0.13146	2.37001
0.13161	1.72802		0.13167	5.96032		0.16087	3.45479			0.13136	1.71205					0.13146	2.37057
0.13161	1.73051		0.13167	5.96143		0.16087	3.45431			0.13162	1.71387					0.13146	2.3709
0.13161	1.73357		0.13167	5.96188		0.16087	3.45442			0.13037	1.7148					0.13146	2.37329
0.16079	1.98027		0.16051	6.19945		0.19037	3.5124			0.16065	1.99125					0.1605	2.43444
0.16091	1.98591		0.16051	6.20246		0.19037	3.51234			0.16095	1.99708					0.1605	2.43187
0.16091	1.99004		0.16051	6.20605		0.19037	3.51185			0.16065	1.99809					0.1605	2.43079
0.16091	1.99363		0.16051	6.20871		0.19037	3.51152			0.16116	1.99929					0.1605	2.43046
0.16091	1.99601		0.16081	6.2091		0.19062	3.51059			0.16129	2.00006					0.16095	2.43073
0.19097	2.21177		0.18968	6.36642		0.21988	3.55443			0.19043	2.24333					0.19013	2.47286
0.19097	2.21605		0.18993	6.36958		0.21988	3.55707			0.1906	2.24812					0.19013	2.47451
0.19097	2.21825		0.18993	6.37267		0.22053	3.55804			0.19106	2.24895					0.1908	2.47486
0.1912	2.21925		0.18993	6.37623		0.22068	3.55844			0.1906	2.25342					0.19095	2.47451
0.19124	2.21946		0.18993	6.38005		0.22084	3.55831			0.19094	2.25356					0.1911	2.47384
0.22027	2.40573		0.22036	6.52225		0.24998	3.57889			0.22021	2.46935					0.22036	2.51844
0.22027	2.40988		0.22036	6.52187		0.25022	3.57755			0.22076	2.47579					0.22058	2.51802
0.22117	2.41304		0.22036	6.52155		0.25046	3.57773			0.22021	2.47777					0.2208	2.51598
0.22136	2.41529		0.22036	6.52168		0.2507	3.57875			0.22082	2.47772					0.22102	2.51328
0.22154	2.41857		0.22071	6.52353		0.24985	3.57897			0.22021	2.47739					0.22021	2.51214
0.25067	2.59759		0.24959	6.63315		0.27952	3.60206			0.25057	2.6682					0.25026	2.54109
0.25087	2.59814		0.24959	6.6364		0.27986	3.60255			0.25057	2.67249					0.25057	2.54189
0.25107	2.59931		0.25021	6.64123		0.27993	3.60271			0.25093	2.67334					0.25057	2.54339
0.24969	2.59959		0.25034	6.64544		0.27993	3.60189			0.25057	2.67312					0.25057	2.54451
0.24969	2.6014		0.25047	6.64864		0.27993	3.60152			0.25083	2.67492					0.25057	2.54547
0.2805	2.7562		0.27864	6.7339		0.30918	3.60142			0.28038	2.84329					0.28006	2.56648
0.2809	2.76054		0.27985	6.73521		0.30918	3.60812			0.27964	2.84546					0.28021	2.56659
0.28126	2.76335		0.2801	6.73798		0.30918	3.60904			0.27964	2.84405					0.28021	2.5667
0.28126	2.76463		0.28037	6.74094		0.30918	3.61021			0.28055	2.84406					0.28021	2.56549
0.28126	2.76356		0.27864	6.74383		0.30943	3.6137			0.27964	2.84671					0.28021	2.56451
0.31105	2.88891		0.30959	6.82515		0.33849	3.6306			0.30991	3.00043					0.31003	2.58705
0.31108	2.88967		0.30988	6.82905		0.33849	3.62979			0.31041	3.0016					0.31003	2.58641
0.31108	2.88971		0.31017	6.83358		0.33925	3.63132			0.30991	3.00394					0.31058	2.58629
0.31108	2.88975		0.31017	6.83447		0.33941	3.6332			0.30991	3.00423					0.31072	2.58633
0.31108	2.88988		0.31017	6.83315		0.33957	3.63301			0.31068	3.00353					0.31086	2.58675
0.34068	3.0097		0.33972	6.89385		0.36842	3.6462			0.33958	3.13907					0.33973	2.61467
0.34068	3.00906		0.33972	6.89667		0.36864	3.6453			0.33833	3.13873					0.33996	2.60856
0.34068	3.00829		0.33972	6.89802		0.36886	3.64522			0.33955	3.13971					0.34019	2.60551
0.34109	3.00767		0.33972	6.89632		0.36737	3.64542			0.33833	3.13823					0.34042	2.6045
0.34117	3.00763		0.33972	6.89363		0.36737	3.64543			0.33833	3.13594					0.3388	2.60432
0.36994	3.11372		0.36928	6.94961		0.39863	3.65804			0.36925	3.25916					0.3692	2.61775
0.37049	3.11674		0.36928	6.95215		0.39909	3.659			0.36966	3.26109					0.36951	2.61676
0.3706	3.11932		0.36928	6.9563		0.39909	3.66091			0.36925	3.2602					0.36981	2.61441
0.37072	3.12142		0.36969	6.9593		0.39909	3.66222			0.36974	3.26047					0.36995	2.61422
0.36994	3.12172		0.36978	6.95889		0.39909	3.6623			0.36925	3.25885					0.36995	2.61682
0.3995	3.20855		0.39868	7.00592		0.42835	3.68564			0.3993	3.37037					0.39884	2.64292
0.39985	3.21277		0.39868	7.01023		0.42835	3.68658			0.39931	3.37155					0.3993	2.63777
0.4002	3.21683		0.39921	7.01282		0.42835	3.68727			0.39962	3.37164					0.39965	2.63616
0.39786	3.21999		0.39933	7.01307		0.42866	3.68693			0.39931	3.37179					0.39965	2.63502
0.39786	3.22221		0.39945	7.01239		0.42873	3.68724			0.39966	3.37248					0.39965	2.63303
0.42982	3.30786		0.42806	7.05207		0.45763	3.68536			0.42914	3.46703					0.42977	2.64802
0.43002	3.30883		0.42885	7.05164		0.45823	3.68195			0.4295	3.46787					0.42977	2.64665
0.43002	3.31109		0.42902	7.05063		0.45837	3.68126			0.4286	3.46693					0.42977	2.64393
0.43002	3.31389		0.42918	7.04838		0.45851	3.68435			0.42941	3.46779					0.42977	2.64186
0.43002	3.31506		0.42806	7.04473		0.45864	3.68729			0.4286	3.47025					0.42988	2.63951
0.46007	3.38637		0.45857	7.08926		0.48781	3.68412			0.45913	3.55992					0.45903	2.65813
0.46007	3.39277		0.45885	7.08681		0.48808	3.68492			0.4592	3.55949					0.45903	2.65812
0.46007	3.39644		0.45914	7.08503		0.48834	3.68558			0.45925	3.5597					0.4594	2.65648
0.46007	3.39463		0.45724	7.08617		0.48841	3.68666			0.45913	3.55774					0.45948	2.65529
0.46052	3.39163		0.45724	7.08624		0.48841	3.68691			0.45931	3.55374					0.45957	2.65244
0.48911	3.46415		0.48881	7.12614		0.51782	3.69491			0.48902	3.62916					0.489	2.66458
0.48972	3.46839		0.48918	7.12491		0.51787	3.6941			0.48789	3.63096					0.48923	2.66489
0.48986	3.4698		0.48918	7.124		0.51787	3.69484			0.48886	3.63302					0.48946	2.66689
0.49001	3.46916		0.48918	7.12273		0.51787	3.6956			0.48911	3.63697					0.48969	2.66843
0.49015	3.46763		0.48918	7.12395		0.51787	3.69624			0.48789	3.63907					0.48807	2.66824
0.51974	3.51396		0.5188	7.15206		0.54735	3.71539			0.51858	3.71424					0.51862	2.67234
0.52005	3.52075		0.51884	7.15106		0.54735	3.71725			0.51913	3.71579					0.51903	2.67484
0.52036	3.52578		0.51884	7.14948		0.54735	3.71819			0.51858	3.71622					0.51943	2.67869
0.52047	3.52918		0.51884	7.14962		0.54765	3.71971			0.51888	3.71526					0.51959	2.68087
0.52047	3.53049		0.51904	7.15488		0.54771	3.71991			0.51896	3.71347					0.51959	2.67919
0.54965	3.57343		0.54807	7.18658		0.57603	3.71883			0.54854	3.77577					0.5486	2.68555
0.54981	3.57316		0.54807	7.18755		0.57711	3.71292			0.54862	3.77671					0.54874	2.68466
0.54981	3.57332		0.54807	7.18813		0.57733	3.70882			0.54897	3.77802					0.54874	2.68345
0.54981	3.57515		0.54854	7.18766		0.57756	3.7052			0.54862	3.78053					0.54874	2.68274
0.54981	3.57661		0.54864	7.18739		0.57603	3.7087			0.54873	3.7798					0.54874	2.68152
0.5796	3.63015		0.57785	7.20064		0.60659	3.73256			0.5781	3.82913					0.57851	2.69394
0.5796	3.62837		0.57808	7.2022		0.60697	3.73083			0.57747	3.83245					0.57851	2.69347
0.5796	3.62868		0.5783	7.20532		0.60724	3.72858			0.57747	3.83487					0.57851	2.69202
0.57981	3.63058		0.57852	7.20692		0.60724	3.72518			0.57881	3.83452					0.57851	2.68995
0.57986	3.6331		0.57691	7.20915		0.60724	3.72134			0.57747	3.83579					0.57909	2.68786
0.60856	3.6895		0.60817	7.23154		0.63719	3.7185			0.60808	3.89004					0.60793	2.7026
0.60932	3.69232		0.60862	7.23906		0.63719	3.71978			0.60844	3.89505					0.60793	2.70427
0.60948	3.6927		0.6087	7.2438		0.63719	3.72251			0.60808	3.89747					0.60856	2.70503
0.60965	3.69135		0.6087	7.24317		0.63719	3.72589			0.60808	3.89721					0.60869	2.70493
0.60856	3.69166		0.6087	7.23632		0.63762	3.72945			0.60867	3.89639					0.60882	2.70384
0.63929	3.73313		0.63789	7.25032		0.66676	3.72475			0.63831	3.9448					0.63843	2.70401
0.63964	3.73596		0.63794	7.2512		0.66676	3.72475			0.63665	3.94737					0.63859	2.70544
0.63999	3.73945		0.63794	7.24717		0.66727	3.72484			0.63842	3.94652					0.63876	2.70544
0.64003	3.74257		0.63794	7.24431		0.66738	3.72547			0.63665	3.9473					0.63893	2.70578
0.64003	3.74598		0.63794	7.24605		0.66749	3.72569			0.63665	3.95113					0.63831	2.70548
0.66927	3.77552		0.66666	7.26883		0.69642	3.73343			0.66784	3.98728					0.66817	2.71284
0.6694	3.77801		0.66767	7.26534		0.69661	3.73184			0.66811	3.99042					0.66849	2.71136
0.6694	3.77888		0.66787	7.26353		0.69679	3.73182			0.66784	3.99223					0.66852	2.7103
0.6694	3.77812		0.66787	7.26675		0.69559	3.73435			0.66849	3.99496					0.66852	2.7125
0.6694	3.77627		0.66787	7.27361		0.69559	3.73699			0.66865	3.99382					0.66852	2.71319
0.69927	3.84688		0.6976	7.28879		0.72575	3.74908			0.69774	4.04061					0.6981	2.7231
0.69927	3.84418		0.6976	7.28582		0.72606	3.75044			0.69787	4.04147					0.6981	2.72108
0.69927	3.84051		0.6976	7.2846		0.72606	3.7496			0.69797	4.04045					0.6981	2.71906
0.6998	3.83596		0.6976	7.28527		0.72606	3.74798			0.69787	4.0421					0.6981	2.718
0.69991	3.83261		0.69794	7.28609		0.72606	3.74703			0.69802	4.04096					0.69853	2.71832
0.7284	3.86708		0.72654	7.30354		0.75419	3.75067			0.7271	4.06923					0.72718	2.72842
0.72916	3.87152		0.72654	7.30254		0.75497	3.7461			0.72763	4.0637					0.72718	2.72855
0.72933	3.87061		0.72727	7.30127		0.75554	3.74141			0.7264	4.06858					0.72777	2.72965
0.72949	3.86593		0.72742	7.3005		0.75554	3.73708			0.72725	4.07261					0.7279	2.72943
0.7284	3.86063		0.72757	7.29957		0.75554	3.73366			0.7264	4.0688					0.72803	2.72658
0.75866	3.90394		0.75521	7.31698		0.78549	3.76067			0.75703	4.11455					0.75612	2.70671
0.75894	3.90407		0.75678	7.31559		0.78563	3.76159			0.75713	4.11585					0.75751	2.72106
0.75919	3.90476		0.7571	7.3112		0.78563	3.76224			0.7572	4.11579					0.75781	2.72902
0.75919	3.9049		0.75742	7.30978		0.78563	3.7624			0.75703	4.11551					0.75811	2.73198
0.75919	3.90402		0.75521	7.31016		0.78563	3.7623			0.75757	4.11645					0.75612	2.73243
0.78778	3.93738		0.78679	7.3418		0.81404	3.74039			0.78664	4.14385					0.78759	2.74226
0.78826	3.93961		0.78712	7.33977		0.81404	3.74008			0.78526	4.15013					0.78788	2.74051
0.78826	3.93979		0.78736	7.33773		0.81404	3.73978			0.787	4.15069					0.7881	2.73876
0.78826	3.93847		0.78736	7.33556		0.81479	3.73992			0.78746	4.15053					0.7881	2.73695
0.78826	3.93684		0.78736	7.33336		0.81494	3.73991			0.78526	4.14785					0.7881	2.7346
0.81765	3.96887		0.81605	7.36398		0.84292	3.77174			0.81586	4.18693					0.81691	2.75236
0.81765	3.97126		0.81605	7.36403		0.84371	3.77285			0.81609	4.18721					0.81691	2.7544
0.81765	3.97378		0.81605	7.36617		0.84388	3.77456			0.81586	4.18761					0.81691	2.75384
0.81765	3.97575		0.81605	7.37161		0.84404	3.77412			0.81586	4.18686					0.81691	2.75419
0.81829	3.97694		0.81639	7.37758		0.84292	3.77113			0.81664	4.18391					0.81718	2.75418
0.84663	3.99867		0.84464	7.37187		0.87088	3.75582			0.8453	4.20669					0.84452	2.75801
0.84663	3.99837		0.84522	7.36862		0.87088	3.76102			0.84389	4.20719					0.84547	2.75614
0.84726	3.99607		0.84522	7.36855		0.8724	3.76465			0.84559	4.21145					0.84547	2.75349
0.84739	3.99347		0.84522	7.36922		0.87274	3.76716			0.84389	4.21445					0.84547	2.75136
0.84751	3.99239		0.84522	7.36861		0.87309	3.76749			0.84389	4.21778					0.84547	2.74864
0.87603	4.02446		0.8744	7.36767		0.90117	3.75415			0.87413	4.24502					0.87521	2.75834
0.87633	4.02746		0.8744	7.36361		0.90139	3.75409			0.87461	4.24499					0.87521	2.75644
0.87662	4.03019		0.8744	7.36278		0.90162	3.75546			0.87413	4.24457					0.87521	2.75341
0.87459	4.03161		0.87495	7.36248		0.90184	3.75797			0.8745	4.24731					0.87561	2.75101
0.87459	4.03184		0.87508	7.36469		0.90024	3.76053			0.87413	4.24555					0.8757	2.75123
0.90482	4.04663		0.90261	7.37462		0.92989	3.77488			0.90339	4.27287					0.9031	2.75742
0.90514	4.0442		0.90261	7.36991		0.93019	3.77423			0.90345	4.27268					0.90391	2.75781
0.90514	4.04282		0.90341	7.36408		0.93031	3.77255			0.90351	4.27302					0.9041	2.75763
0.90514	4.04194		0.90358	7.36006		0.93031	3.76822			0.90345	4.27197					0.90429	2.758
0.90514	4.04246		0.90376	7.3589		0.93031	3.764			0.90368	4.27549					0.90447	2.75944
0.93341	4.06317		0.93072	7.40305		0.95828	3.78084			0.93173	4.29865					0.93251	2.76623
0.93341	4.06691		0.9319	7.40251		0.95875	3.78203			0.93212	4.29726					0.93282	2.76572
0.93341	4.07087		0.93215	7.40009		0.95875	3.78359			0.93117	4.29787					0.93313	2.76549
0.934	4.0753		0.9324	7.39861		0.95875	3.78193			0.93222	4.29705					0.93321	2.76348
0.93413	4.07462		0.93072	7.39842		0.95875	3.78017			0.93117	4.29171					0.93321	2.76483
0.96168	4.06635		0.95984	7.40166		0.99167	3.7571			0.95991	4.31355					0.96097	2.75835
0.96244	4.06752		0.96015	7.40395		0.99167	3.76119			0.96034	4.31353					0.96108	2.75832
0.96261	4.06923		0.96043	7.40448		0.99167	3.76707			0.96064	4.3124					0.96108	2.75821
0.96277	4.07044		0.96043	7.40256		0.99167	3.77125			0.95991	4.31319					0.96108	2.75834
0.96168	4.07177		0.96043	7.39939		0.9924	3.77379			0.9603	4.31489					0.96108	2.75915
0.99904	4.12954		0.99461	7.40269						0.99476	4.33302					0.99686	2.75823
0.99971	4.1306		0.99545	7.40086						0.99305	4.33372					0.99686	2.75766
1.00023	4.12994		0.99545	7.39947						0.99564	4.33865					0.99686	2.75847
1.00023	4.12822		0.99545	7.40098						0.99632	4.33863					0.99686	2.76032
1.00023	4.12533		0.99545	7.4046						0.99305	4.33482					0.99785	2.76266
																1.09665	2.78153
																1.09742	2.78464

## Sheet: MNPs
MNP2		MNP3		MNP4
1.00121	79.5815	1.00293	82.75	0.98752	94.5732
1.0014	79.7259	1.00363	82.75	0.98752	94.5732
1.00121	79.8482	1.00379	82.7625	0.98934	94.5854
1.00121	79.8889	1.00396	82.7625	0.98971	94.5732
1.00141	79.8778	1.00412	82.7625	0.99007	94.5732
0.96357	79.4852	0.96667	82.4625	0.95836	94.3415
0.96411	79.3889	0.96646	82.45	0.95772	94.3537
0.96382	79.5	0.96624	82.45	0.95759	94.3658
0.96411	79.4259	0.96768	82.4375	0.95746	94.3537
0.96411	79.4	0.96768	82.4375	0.95836	94.3415
0.93514	78.7519	0.93782	82.125	0.92957	94.1219
0.93528	78.8222	0.93763	82.1125	0.9294	94.1098
0.93528	78.8037	0.93763	82.1125	0.92923	94.1219
0.93478	78.7963	0.93763	82.1	0.93039	94.1219
0.93528	78.8148	0.93763	82.1	0.93039	94.1219
0.90612	78.2222	0.90828	81.7625	0.90054	93.8902
0.90572	78.2222	0.90828	81.75	0.90023	93.8781
0.90612	78.1704	0.90828	81.75	0.90013	93.8781
0.90568	78.1259	0.90825	81.75	0.90013	93.8658
0.90612	78.1889	0.90825	81.75	0.90013	93.8537
0.87698	77.8	0.87943	81.4	0.87153	93.6342
0.87705	77.7519	0.87943	81.3875	0.87153	93.6219
0.8767	77.6407	0.8791	81.375	0.87153	93.6098
0.87705	77.5593	0.87903	81.375	0.87153	93.6219
0.87705	77.8556	0.87895	81.375	0.87133	93.6098
0.84751	77.1556	0.85001	81.0125	0.84243	93.3658
0.84707	77.1259	0.84987	81	0.84243	93.3658
0.84813	77.2556	0.84973	81	0.84201	93.3658
0.84733	77.2556	0.85064	80.9875	0.84192	93.3537
0.84813	77.2556	0.85064	80.9875	0.84183	93.3415
0.81812	76.5259	0.82031	80.65	0.81343	93.1219
0.81776	76.5148	0.82006	80.6375	0.81296	93.1219
0.81812	76.4852	0.81982	80.625	0.81286	93.1219
0.81754	76.5333	0.81981	80.6125	0.81275	93.1098
0.81812	76.337	0.81981	80.6125	0.81343	93.1098
0.78869	75.8778	0.79003	80.2625	0.78375	92.8537
0.78869	75.8037	0.79003	80.25	0.78351	92.8415
0.78811	75.9407	0.79003	80.225	0.7833	92.8293
0.78869	75.9815	0.79003	80.2125	0.7833	92.8171
0.78835	75.7852	0.79002	80.2125	0.7833	92.8171
0.75848	75.1111	0.76077	79.85	0.7543	92.5854
0.75919	75.137	0.76077	79.8375	0.75389	92.5732
0.75843	75.2407	0.76022	79.8375	0.75389	92.561
0.75919	75.2852	0.7601	79.825	0.75389	92.561
0.75853	75.237	0.75997	79.825	0.75389	92.561
0.72881	74.3222	0.73053	79.425	0.72423	92.2927
0.729	74.1593	0.73039	79.425	0.72423	92.2927
0.72855	74.0778	0.73026	79.425	0.72423	92.2927
0.729	74.2037	0.73013	79.4125	0.72392	92.2927
0.729	74.3889	0.73108	79.4125	0.72385	92.2683
0.69927	73.6111	0.70087	79.0125	0.69513	92
0.69967	73.5815	0.70057	79.0125	0.69513	91.9878
0.69967	73.5556	0.70031	79	0.69469	91.9756
0.6988	73.5556	0.70031	78.9875	0.69458	91.9634
0.69967	73.5444	0.70031	78.975	0.69448	91.9512
0.66918	72.6889	0.67084	78.55	0.66613	91.6829
0.66902	72.6704	0.67042	78.5375	0.66527	91.6829
0.66918	72.6667	0.67042	78.525	0.66507	91.6707
0.66918	72.5778	0.67042	78.5375	0.66488	91.6585
0.66892	72.6333	0.67042	78.525	0.66468	91.6463
0.63889	71.7185	0.64056	78.0875	0.63563	91.3049
0.63889	71.7	0.6405	78.075	0.63536	91.3049
0.63889	71.6593	0.6405	78.075	0.6351	91.3049
0.63889	71.6593	0.6405	78.0625	0.6351	91.2927
0.63901	71.6333	0.6405	78.05	0.6351	91.2805
0.60919	70.8037	0.61033	77.6	0.6058	90.9634
0.60992	70.737	0.61033	77.5875	0.60534	90.9634
0.60897	70.6778	0.61033	77.5625	0.6053	90.9512
0.60992	70.4518	0.60986	77.5625	0.6053	90.9268
0.60908	70.5741	0.60976	77.55	0.6053	90.9268
0.57896	69.7333	0.58079	77.0875	0.57535	90.6219
0.5793	69.5704	0.5802	77.075	0.57535	90.5976
0.5787	69.6815	0.58005	77.0625	0.57535	90.5976
0.5793	69.6259	0.5799	77.0625	0.57535	90.5854
0.5793	69.6074	0.57975	77.0375	0.57529	90.5732
0.54884	68.4	0.55008	76.525	0.54608	90.1951
0.54969	68.4	0.54991	76.5125	0.54608	90.1829
0.54969	68.4037	0.54974	76.5	0.54608	90.1707
0.54849	68.4037	0.5509	76.4875	0.54554	90.1707
0.54969	68.3518	0.5509	76.4875	0.54541	90.1463
0.51927	67.0407	0.52016	75.9375	0.51643	89.7805
0.51868	66.8667	0.5198	75.925	0.51643	89.7561
0.51927	67	0.51957	75.9125	0.51599	89.7439
0.51876	67.1037	0.51957	75.9125	0.51588	89.7317
0.51927	66.9926	0.51957	75.9	0.51577	89.7317
0.48934	65.7037	0.48946	75.35	0.48678	89.3293
0.48903	65.6518	0.48946	75.3375	0.48678	89.3171
0.48934	65.6407	0.48946	75.325	0.48613	89.3171
0.48934	65.4741	0.48946	75.325	0.486	89.3049
0.48888	65.4	0.48933	75.3	0.48587	89.2927
0.45896	64.1185	0.46008	74.6875	0.45665	88.8781
0.45863	63.8778	0.46008	74.675	0.45643	88.8658
0.45896	63.9148	0.46008	74.6625	0.45621	88.8537
0.45896	64.0333	0.45962	74.6625	0.45611	88.8415
0.45883	64.0482	0.45952	74.65	0.45611	88.8293
0.42912	62.3852	0.43035	73.9875	0.4268	88.3781
0.4296	62.4259	0.43035	73.975	0.42642	88.3658
0.42887	62.3074	0.42964	73.9625	0.42623	88.3658
0.4296	62.1889	0.4295	73.9625	0.42623	88.3537
0.4296	62.3778	0.42935	73.95	0.42623	88.3415
0.39911	60.5259	0.40048	73.2375	0.39657	87.8171
0.39951	60.4852	0.39942	73.225	0.39657	87.8049
0.39951	60.3963	0.3992	73.2	0.39657	87.7927
0.39882	60.3667	0.39899	73.1875	0.39657	87.7927
0.39951	60.3407	0.40048	73.175	0.39641	87.7805
0.36938	58.4815	0.3698	72.4	0.36703	87.2561
0.36895	58.2741	0.36956	72.375	0.36703	87.2439
0.36938	58.4815	0.36932	72.3625	0.36703	87.2195
0.36862	58.4815	0.371	72.35	0.36674	87.2073
0.36938	58.2444	0.371	72.3375	0.36668	87.2073
0.33903	55.8815	0.33948	71.4875	0.33789	86.6342
0.33891	55.6296	0.33904	71.475	0.33789	86.6219
0.33903	55.637	0.33886	71.45	0.3371	86.6098
0.33903	55.9593	0.33886	71.4375	0.33692	86.5976
0.33855	55.9593	0.33886	71.425	0.33674	86.5854
0.3091	53.163	0.30899	70.425	0.30751	85.9024
0.3091	53.3148	0.30899	70.4	0.30727	85.8902
0.30857	53.1741	0.30899	70.4	0.30702	85.8781
0.3091	53.1704	0.30899	70.3875	0.30678	85.8658
0.30869	53.1444	0.30873	70.375	0.30765	85.8537
0.27932	50.2444	0.27947	69.2375	0.27802	85.1342
0.27866	50.0778	0.27947	69.2125	0.27773	85.1219
0.27932	49.9111	0.27878	69.2125	0.27744	85.0976
0.27932	50.1296	0.27863	69.2125	0.27733	85.0732
0.2785	50.1074	0.27849	69.2	0.27733	85.0732
0.24858	47.0407	0.24969	67.925	0.24728	84.1951
0.24957	46.9519	0.24897	67.8875	0.2471	84.1707
0.24875	46.9037	0.24883	67.875	0.2471	84.1585
0.24957	47.0296	0.24868	67.85	0.2471	84.1463
0.24882	46.9852	0.24969	67.8375	0.2471	84.1342
0.21904	43.2074	0.21885	66.3125	0.21764	83.1098
0.21992	43.1407	0.2186	66.2875	0.21764	83.0854
0.21868	43.1	0.21848	66.2625	0.21764	83.0732
0.21992	43.0889	0.21848	66.25	0.21742	83.061
0.21992	43.1259	0.21848	66.2375	0.21738	83.0488
0.18884	39.4037	0.18838	64.35	0.18859	81.8171
0.18897	39.0296	0.18838	64.3125	0.1878	81.7805
0.18897	39.0481	0.18838	64.2875	0.18761	81.7561
0.1885	38.9259	0.18838	64.2625	0.18742	81.7439
0.18897	38.8926	0.18801	64.2375	0.18723	81.7317
0.15881	34.1111	0.1587	61.9	0.15808	80.1585
0.15881	33.9963	0.1587	61.85	0.15788	80.1219
0.15826	34.0519	0.1587	61.8125	0.15769	80.1098
0.15881	34.1185	0.15811	61.775	0.15759	80.0854
0.15839	34.1296	0.15798	61.7375	0.15759	80.0732
0.12876	29.063	0.12855	58.4625	0.12801	77.939
0.12838	29.0481	0.12804	58.4125	0.12783	77.8902
0.12876	28.9741	0.12792	58.35	0.12783	77.8537
0.12876	28.8778	0.1278	58.3125	0.12783	77.8415
0.12835	28.8333	0.12768	58.2875	0.12783	77.8171
0.09822	23.0741	0.09815	53.5125	0.09829	74.7073
0.09822	23.1333	0.09791	53.425	0.09829	74.6585
0.09809	22.9704	0.09767	53.3625	0.09829	74.6098
0.09822	22.9	0.0976	53.3	0.09783	74.561
0.09815	22.9074	0.0976	53.275	0.09773	74.5366
0.08831	20.8	0.088	51.1375	0.08787	73.0976
0.08816	20.737	0.08762	51.0875	0.0878	73.0488
0.08831	20.6482	0.08753	51.05	0.0878	73.0244
0.08831	20.8815	0.08744	51.025	0.0878	73.0122
0.08805	20.8889	0.08735	50.9875	0.0878	73
0.07836	18.5704	0.07751	48.4875	0.07788	71.2927
0.07859	18.5481	0.07751	48.425	0.07775	71.2439
0.07859	18.5667	0.07751	48.35	0.0777	71.2195
0.07783	18.5667	0.07751	48.3125	0.0777	71.1951
0.07859	18.5778	0.07718	48.2875	0.0777	71.1707
0.06824	16.4815	0.06742	45.3375	0.06792	69.1707
0.0685	16.363	0.06719	45.25	0.06779	69.1098
0.06793	16.4444	0.06718	45.1875	0.06765	69.061
0.0685	16.4407	0.06718	45.1375	0.06751	69.0244
0.06809	16.437	0.06718	45.1125	0.06847	69
0.05848	14.1704	0.05765	41.5375	0.05836	66.4878
0.05802	14.1518	0.05752	41.45	0.05836	66.4146
0.05848	14.0296	0.05742	41.3875	0.05801	66.3415
0.05848	14.0667	0.05742	41.35	0.05793	66.2927
0.05781	14.0333	0.05742	41.3125	0.05784	66.2439
0.04822	11.9741	0.04764	37.0125	0.04786	62.9878
0.04863	11.8444	0.04742	36.9	0.04786	62.8781
0.04863	11.8037	0.04738	36.8125	0.04786	62.7927
0.04771	11.8667	0.04733	36.7375	0.04786	62.7317
0.04863	11.8519	0.04764	36.6875	0.0477	62.6707
0.03776	9.49259	0.03724	31.2375	0.03767	58.1951
0.03776	9.35926	0.03724	31.1125	0.03744	58.0488
0.03744	9.35926	0.03687	31.0125	0.0373	57.9268
0.03776	9.39259	0.03679	30.9375	0.0373	57.8293
0.03748	9.35926	0.03671	30.875	0.0373	57.7439
0.02806	7.11481	0.02713	24.9875	0.02812	51.8659
0.02791	7.04074	0.02713	24.8	0.02797	51.6585
0.02806	6.98148	0.02713	24.65	0.02782	51.4878
0.02779	7.08148	0.02713	24.525	0.02768	51.3537
0.02806	6.97407	0.02692	24.4375	0.02871	51.2439
0.0179	4.73704	0.01728	17.2375	0.01829	42.1463
0.01839	4.70741	0.01707	17.025	0.01782	41.8659
0.01778	4.66296	0.01703	16.8625	0.01771	41.6341
0.01839	4.5037	0.01703	16.7125	0.01759	41.439
0.01839	4.76296	0.01703	16.6125	0.01748	41.2805
0.00834	2.21111	0.00727	8.375	0.00872	26.9512
0.00783	2.15185	0.00707	8.175	0.00829	26.4756
0.00834	2.11481	0.00703	8.0125	0.0082	26.0732
0.0077	2.0963	0.00703	7.875	0.0081	25.7439
0.00834	2.08148	0.00703	7.775	0.008	25.4878
-0.0013	-0.16374	-0.00194	-0.49967	-0.00102	1.28049
-0.000840764	-0.2496	-0.00207	-0.74809	-0.00102	0.32251
-0.00149	-0.23924	-0.0022	-0.94819	-0.00144	-0.46488
-0.000840764	-0.25859	-0.00223	-1.10751	-0.00154	-1.11835
-0.00174	-0.27974	-0.00223	-1.23794	-0.00164	-1.63415
-0.01176	-2.64815	-0.01183	-9.65	-0.01104	-26.7927
-0.01176	-2.76296	-0.01204	-9.9	-0.01125	-27.2927
-0.01214	-2.84815	-0.01204	-10.0875	-0.01146	-27.6951
-0.01176	-2.93704	-0.01204	-10.25	-0.00996	-28.0244
-0.01217	-2.8037	-0.01204	-10.3875	-0.00996	-28.2927
-0.02176	-5.1	-0.02191	-18.3875	-0.02077	-42.0854
-0.02159	-5.14815	-0.02208	-18.5625	-0.02095	-42.3902
-0.02159	-5.1037	-0.02209	-18.7125	-0.02113	-42.6341
-0.0223	-5.24444	-0.02209	-18.8375	-0.01987	-42.8293
-0.02159	-5.27037	-0.02209	-18.925	-0.01987	-42.9756
-0.03192	-7.58519	-0.032	-25.9	-0.03078	-51.7317
-0.03217	-7.64444	-0.03217	-26.0625	-0.03094	-51.939
-0.03192	-7.7	-0.03224	-26.1875	-0.0311	-52.0976
-0.03232	-7.55926	-0.03224	-26.3	-0.03118	-52.2439
-0.03192	-7.65556	-0.03224	-26.3875	-0.03118	-52.3415
-0.04173	-9.89259	-0.04173	-32.225	-0.03996	-58.1341
-0.04118	-9.96296	-0.04187	-32.3625	-0.04057	-58.2927
-0.04118	-10.0593	-0.042	-32.45	-0.04072	-58.4268
-0.04215	-10.1185	-0.04202	-32.5375	-0.04087	-58.5244
-0.04118	-10.0259	-0.04202	-32.6	-0.04102	-58.5976
-0.05217	-12.4259	-0.05245	-37.825	-0.04986	-62.1951
-0.05217	-12.4593	-0.05259	-37.925	-0.04986	-62.4878
-0.05266	-12.4556	-0.05274	-38	-0.04986	-62.7561
-0.05217	-12.5037	-0.05288	-38.075	-0.05081	-62.9634
-0.05263	-12.7074	-0.05241	-38.1375	-0.05101	-63.1219
-0.06186	-14.7852	-0.06232	-42.3125	-0.06132	-66.8415
-0.0627	-14.8593	-0.06232	-42.4	-0.06132	-66.9024
-0.06186	-14.9074	-0.06268	-42.4625	-0.06132	-66.9512
-0.06248	-14.9222	-0.06275	-42.5125	-0.06158	-66.9756
-0.06186	-14.937	-0.06282	-42.55	-0.06165	-67
-0.07211	-17.1518	-0.07258	-45.95	-0.07109	-69.4512
-0.07252	-17.2407	-0.07258	-46.0125	-0.07126	-69.5122
-0.07211	-17.2111	-0.07258	-46.0625	-0.07131	-69.561
-0.07211	-17.2741	-0.07303	-46.1	-0.07131	-69.5854
-0.07245	-17.3259	-0.07312	-46.125	-0.07131	-69.6098
-0.08182	-19.2556	-0.08252	-48.9625	-0.08133	-71.6219
-0.08247	-19.3296	-0.08252	-49.0125	-0.08145	-71.6585
-0.08182	-19.363	-0.08252	-49.0625	-0.08157	-71.6951
-0.08261	-19.3778	-0.08252	-49.0875	-0.08162	-71.7073
-0.08182	-19.3296	-0.08283	-49.1125	-0.08162	-71.7317
-0.0923	-21.5037	-0.09274	-51.475	-0.09088	-73.3415
-0.09195	-21.5111	-0.09295	-51.5375	-0.09135	-73.3781
-0.09249	-21.5259	-0.09304	-51.575	-0.09146	-73.4146
-0.09195	-21.563	-0.09304	-51.6	-0.09157	-73.439
-0.09195	-21.5222	-0.09304	-51.6375	-0.09168	-73.4634
-0.10228	-23.4148	-0.10273	-53.6375	-0.1009	-74.8537
-0.10239	-23.6111	-0.10284	-53.6875	-0.1009	-74.8902
-0.10228	-23.6259	-0.10295	-53.725	-0.10124	-74.9024
-0.10228	-23.7037	-0.10307	-53.75	-0.10132	-74.9146
-0.10254	-23.5704	-0.10228	-53.775	-0.1014	-74.939
-0.1028	-23.637	-0.10297	-53.8875	-0.10142	-74.9878
-0.10261	-23.6444	-0.10297	-53.875	-0.10142	-75
-0.10261	-23.6444	-0.10298	-53.875	-0.10142	-75
-0.10263	-23.637	-0.10298	-53.8875	-0.10142	-75
-0.10261	-23.637	-0.10299	-53.8875	-0.10155	-74.9756
-0.13185	-29.1778	-0.13217	-58.4375	-0.13051	-78
-0.1324	-29.2704	-0.13244	-58.5	-0.13051	-78.0366
-0.13185	-29.2704	-0.13271	-58.5375	-0.13079	-78.0732
-0.13223	-29.2815	-0.13087	-58.575	-0.13086	-78.0854
-0.13185	-29.3407	-0.13087	-58.6	-0.13093	-78.0976
-0.16187	-34.6815	-0.16227	-61.8125	-0.15905	-80.1829
-0.16187	-34.6556	-0.16252	-61.85	-0.15905	-80.2317
-0.162	-34.7185	-0.16252	-61.875	-0.15991	-80.2561
-0.16187	-34.7333	-0.16252	-61.9	-0.1601	-80.2683
-0.16232	-34.5852	-0.16252	-61.9125	-0.16028	-80.2805
-0.1914	-39.2963	-0.19103	-64.2375	-0.18927	-81.8781
-0.19089	-39.4704	-0.19103	-64.275	-0.1895	-81.9024
-0.19145	-39.5037	-0.19103	-64.3125	-0.18974	-81.9268
-0.19089	-39.5778	-0.19147	-64.325	-0.18983	-81.939
-0.19089	-39.3074	-0.19156	-64.325	-0.18983	-81.939
-0.22045	-43.3778	-0.221	-66.2375	-0.21912	-83.2073
-0.2215	-43.3926	-0.22139	-66.25	-0.21945	-83.2317
-0.22045	-43.6074	-0.22148	-66.2625	-0.21945	-83.2561
-0.22143	-43.4444	-0.22157	-66.275	-0.21945	-83.2561
-0.22045	-43.3926	-0.22167	-66.2875	-0.21945	-83.2683
-0.25098	-47.0667	-0.25069	-67.825	-0.24835	-84.3171
-0.25128	-47.1556	-0.25093	-67.85	-0.24835	-84.3415
-0.25098	-47.0852	-0.25117	-67.875	-0.24835	-84.3415
-0.25098	-47.0926	-0.25141	-67.8875	-0.24889	-84.3293
-0.2513	-47.1482	-0.24963	-67.8875	-0.24901	-84.3293
-0.2806	-50.3963	-0.28085	-69.1875	-0.27768	-85.2195
-0.2806	-50.463	-0.28117	-69.2	-0.27768	-85.2195
-0.28115	-50.4222	-0.28135	-69.2125	-0.27807	-85.2317
-0.2806	-50.5222	-0.28135	-69.225	-0.27816	-85.2439
-0.28107	-50.5593	-0.28135	-69.225	-0.27825	-85.2561
-0.31052	-53.2037	-0.3107	-70.375	-0.3073	-86.0366
-0.30994	-53.0259	-0.3107	-70.3875	-0.30755	-86.0488
-0.31077	-53.3148	-0.3107	-70.4	-0.3078	-86.061
-0.30994	-53.3074	-0.3107	-70.4	-0.30617	-86.061
-0.30994	-53.3889	-0.31104	-70.4	-0.30617	-86.061
-0.33977	-56.0296	-0.33985	-71.375	-0.33639	-86.7317
-0.33912	-56.0815	-0.33985	-71.4	-0.33685	-86.7439
-0.33912	-56.0852	-0.34059	-71.425	-0.33722	-86.7561
-0.34017	-56.0889	-0.34075	-71.425	-0.33722	-86.7561
-0.33912	-56.0778	-0.34092	-71.4375	-0.33722	-86.7561
-0.36933	-58.4889	-0.36927	-72.3	-0.36632	-87.3658
-0.36974	-58.5185	-0.36927	-72.325	-0.36642	-87.3781
-0.36933	-58.4704	-0.3702	-72.325	-0.36642	-87.3902
-0.36933	-58.4704	-0.37039	-72.3375	-0.36642	-87.3902
-0.3699	-58.4704	-0.37057	-72.3375	-0.36642	-87.3902
-0.39895	-60.4444	-0.39914	-73.125	-0.39568	-87.9634
-0.39798	-60.4926	-0.39936	-73.15	-0.39568	-87.9634
-0.39926	-60.5333	-0.39958	-73.1625	-0.39568	-87.9878
-0.39798	-60.5741	-0.39811	-73.1625	-0.39618	-88
-0.39798	-60.537	-0.39811	-73.1625	-0.39629	-88
-0.42872	-62.3518	-0.42897	-73.85	-0.42448	-88.5
-0.42836	-62.3185	-0.42939	-73.8875	-0.42531	-88.5122
-0.42836	-62.3963	-0.42951	-73.9125	-0.42549	-88.5366
-0.42896	-62.4704	-0.42951	-73.925	-0.42568	-88.5366
-0.42836	-62.463	-0.42951	-73.925	-0.42586	-88.5366
-0.45861	-64.1704	-0.45888	-74.6125	-0.45428	-88.9512
-0.45848	-64.1593	-0.45888	-74.625	-0.45468	-88.9878
-0.45888	-64.1482	-0.45888	-74.625	-0.45509	-89
-0.45903	-64.2259	-0.45888	-74.625	-0.45509	-89.0122
-0.45848	-64.3037	-0.45922	-74.625	-0.45509	-89.0122
-0.48777	-65.7889	-0.48823	-75.25	-0.48434	-89.4756
-0.48894	-65.8407	-0.48823	-75.2625	-0.48434	-89.4756
-0.48777	-65.7815	-0.48868	-75.275	-0.48434	-89.4878
-0.48861	-65.9111	-0.48878	-75.275	-0.48434	-89.4878
-0.48777	-65.9518	-0.48888	-75.275	-0.48468	-89.4878
-0.51819	-67.2	-0.51827	-75.8875	-0.51382	-89.9146
-0.51844	-67.2481	-0.51846	-75.8875	-0.51382	-89.9146
-0.51819	-67.3482	-0.51865	-75.8875	-0.51417	-89.9146
-0.51819	-67.3185	-0.51884	-75.8875	-0.51425	-89.9146
-0.51874	-67.3593	-0.51746	-75.8875	-0.51434	-89.9146
-0.54812	-68.563	-0.54798	-76.4375	-0.54392	-90.2561
-0.54638	-68.5963	-0.5483	-76.4375	-0.54412	-90.3049
-0.54824	-68.5963	-0.54837	-76.45	-0.54433	-90.3171
-0.54638	-68.5778	-0.54837	-76.45	-0.54453	-90.3293
-0.54638	-68.5778	-0.54837	-76.45	-0.54308	-90.3293
-0.57802	-69.9074	-0.57861	-76.9625	-0.57327	-90.6951
-0.57786	-69.9926	-0.57861	-76.9625	-0.57357	-90.6951
-0.57786	-69.7667	-0.57861	-76.975	-0.57388	-90.6829
-0.57835	-69.7556	-0.57861	-76.9625	-0.57398	-90.6951
-0.57786	-69.8111	-0.57866	-76.975	-0.57398	-90.6951
-0.60783	-71.0482	-0.60797	-77.475	-0.60344	-91.061
-0.60818	-70.9556	-0.60797	-77.475	-0.60362	-91.061
-0.60783	-71.0444	-0.60848	-77.4875	-0.60362	-91.061
-0.60822	-71.0148	-0.60859	-77.4875	-0.60362	-91.061
-0.60783	-71.0444	-0.60871	-77.4875	-0.60362	-91.0732
-0.63841	-71.9667	-0.63757	-77.975	-0.6334	-91.4512
-0.63841	-71.837	-0.63835	-77.9875	-0.6334	-91.4512
-0.63861	-71.9074	-0.63854	-77.9875	-0.6334	-91.4512
-0.63841	-71.8852	-0.63872	-77.9875	-0.6334	-91.4512
-0.63894	-72.0185	-0.63891	-77.9875	-0.63364	-91.4512
-0.66854	-72.8852	-0.6685	-78.45	-0.66314	-91.7561
-0.66855	-72.9148	-0.66887	-78.45	-0.66314	-91.7805
-0.66871	-72.7926	-0.66923	-78.4625	-0.66348	-91.7805
-0.66855	-73.2556	-0.6693	-78.45	-0.66357	-91.7927
-0.6689	-73.3778	-0.6693	-78.45	-0.66365	-91.7927
-0.69853	-73.8704	-0.69932	-78.9	-0.69229	-92.0854
-0.69706	-73.8556	-0.69934	-78.9	-0.69306	-92.0976
-0.69854	-73.7963	-0.69934	-78.9125	-0.69324	-92.1098
-0.69706	-73.7037	-0.69934	-78.9125	-0.69342	-92.0976
-0.69706	-73.7741	-0.69934	-78.9125	-0.6936	-92.0854
-0.72811	-74.5593	-0.72879	-79.3375	-0.72298	-92.3781
-0.72811	-74.7296	-0.72879	-79.3375	-0.72326	-92.3781
-0.72875	-74.4556	-0.72879	-79.3375	-0.72354	-92.3658
-0.72811	-74.563	-0.7293	-79.3375	-0.72164	-92.3658
-0.72878	-74.6148	-0.72941	-79.35	-0.72164	-92.3537
-0.75927	-75.4518	-0.75836	-79.7375	-0.75259	-93.0244
-0.75805	-75.4556	-0.75906	-79.7375	-0.75317	-92.8415
-0.75918	-75.5074	-0.75922	-79.75	-0.75371	-92.7561
-0.75805	-75.5333	-0.75938	-79.75	-0.75371	-92.6951
-0.75934	-75.5185	-0.75954	-79.75	-0.75371	-92.6829
-0.78913	-76.1482	-0.78931	-80.1625	-0.78344	-92.9512
-0.78795	-76.1444	-0.78959	-80.1625	-0.78358	-92.9512
-0.78905	-76.1482	-0.78988	-80.1625	-0.78358	-92.939
-0.78935	-76.2185	-0.78995	-80.1625	-0.78358	-92.9512
-0.78795	-76.2222	-0.78995	-80.1625	-0.78358	-92.9512
-0.81882	-76.8741	-0.81941	-80.5375	-0.81284	-93.2805
-0.81928	-76.8185	-0.81941	-80.5375	-0.81284	-93.2805
-0.81882	-76.7593	-0.81941	-80.5375	-0.81284	-93.2683
-0.8193	-76.7	-0.81941	-80.5375	-0.81335	-93.2561
-0.81882	-76.7111	-0.81981	-80.525	-0.81347	-93.2683
-0.84888	-77.2778	-0.84936	-80.9	-0.84226	-93.5366
-0.84922	-77.3222	-0.84936	-80.9125	-0.84313	-93.5366
-0.84888	-77.2074	-0.84936	-80.9125	-0.84334	-93.5244
-0.84888	-77.1889	-0.84992	-80.9125	-0.84354	-93.5122
-0.84969	-77.2481	-0.85004	-80.9125	-0.84374	-93.5122
-0.8793	-78.0815	-0.8789	-81.275	-0.87242	-93.7683
-0.87823	-78.0889	-0.8796	-81.2875	-0.87274	-93.7683
-0.87919	-78.0593	-0.87975	-81.275	-0.87305	-93.7683
-0.87823	-78.0778	-0.8799	-81.275	-0.87313	-93.7805
-0.87823	-78.0741	-0.8789	-81.275	-0.87313	-93.7683
-0.90822	-78.5852	-0.90883	-81.6125	-0.90174	-94
-0.90876	-78.6185	-0.90908	-81.6125	-0.90208	-94
-0.90822	-78.6222	-0.90933	-81.6125	-0.90208	-94
-0.90893	-78.6185	-0.9094	-81.6125	-0.90208	-93.9878
-0.90822	-78.6148	-0.9094	-81.625	-0.90208	-93.9878
-0.93813	-79.0148	-0.93794	-81.975	-0.9312	-94.2317
-0.93828	-78.8815	-0.9384	-81.9875	-0.9312	-94.2317
-0.93813	-78.7519	-0.93886	-81.975	-0.9312	-94.2439
-0.93813	-79.0778	-0.93886	-81.975	-0.93166	-94.2439
-0.93871	-79.1407	-0.93886	-81.9875	-0.93177	-94.2439
-0.96716	-79.7111	-0.9674	-82.3	-0.95991	-94.4756
-0.96716	-79.6815	-0.96759	-82.325	-0.95991	-94.4756
-0.96746	-79.6556	-0.96759	-82.325	-0.9605	-94.4756
-0.96716	-79.6518	-0.96759	-82.325	-0.96062	-94.4756
-0.96716	-79.6407	-0.96759	-82.3125	-0.96074	-94.4512
-0.9958	-80.1518	-0.99598	-82.6375	-0.98728	-94.6585
-0.99513	-80.0815	-0.99598	-82.6375	-0.98837	-94.6829
-0.99513	-80.137	-0.99598	-82.6375	-0.98863	-94.6829
-0.99602	-79.7037	-0.99635	-82.6375	-0.98888	-94.6951
-0.99513	-80.0815	-0.99643	-82.6375	-0.98913	-94.6951
-0.9674	-79.5852	-0.96865	-82.35	-0.96126	-94.4634
-0.96717	-79.5741	-0.96865	-82.3375	-0.9611	-94.4634
-0.9674	-79.5556	-0.96803	-82.3375	-0.96094	-94.4634
-0.9674	-79.5852	-0.9679	-82.3375	-0.96205	-94.4634
-0.9672	-79.737	-0.96778	-82.3375	-0.96205	-94.4634
-0.93818	-79.1	-0.93914	-82.025	-0.93201	-94.2317
-0.93818	-79.1889	-0.93897	-82.0125	-0.93166	-94.2317
-0.93821	-78.7889	-0.9388	-82	-0.93143	-94.2195
-0.93818	-79.037	-0.93876	-82	-0.93143	-94.2195
-0.93779	-79.1037	-0.93876	-82	-0.93143	-94.1829
-0.90859	-78.4296	-0.90897	-81.6625	-0.9021	-93.9634
-0.90887	-78.4593	-0.90888	-81.65	-0.90174	-93.9634
-0.90817	-78.3407	-0.90888	-81.65	-0.90174	-93.9756
-0.90887	-78.6407	-0.90888	-81.65	-0.90174	-93.9756
-0.90887	-78.6482	-0.90888	-81.6625	-0.90174	-93.9634
-0.87882	-78.1259	-0.87902	-81.325	-0.87251	-93.7317
-0.87923	-77.8778	-0.87902	-81.3125	-0.87251	-93.7195
-0.87923	-77.9704	-0.87902	-81.3	-0.87251	-93.7195
-0.87867	-77.9333	-0.87902	-81.3	-0.87237	-93.7073
-0.87923	-77.863	-0.87896	-81.2875	-0.87233	-93.6951
-0.84886	-77.2444	-0.84922	-80.95	-0.84275	-93.5122
-0.84859	-77.3	-0.84922	-80.95	-0.84275	-93.4878
-0.84886	-77.2778	-0.84903	-80.95	-0.84237	-93.4634
-0.84847	-77.3148	-0.84899	-80.9375	-0.84227	-93.4634
-0.84886	-77.363	-0.84894	-80.925	-0.84218	-93.4634
-0.81851	-76.7148	-0.81986	-80.55	-0.81321	-93.2195
-0.81852	-76.8259	-0.81915	-80.55	-0.81321	-93.2073
-0.81851	-76.9481	-0.81901	-80.55	-0.81255	-93.2073
-0.81851	-76.6889	-0.81887	-80.5375	-0.81241	-93.1951
-0.81807	-76.6593	-0.81986	-80.5375	-0.81228	-93.1829
-0.7886	-76.0667	-0.78884	-80.15	-0.78347	-92.939
-0.78905	-76.0704	-0.7886	-80.1375	-0.78285	-92.9268
-0.78833	-76.0741	-0.78843	-80.1375	-0.78271	-92.9146
-0.78905	-76.0667	-0.78843	-80.1375	-0.78257	-92.9146
-0.78828	-76.0667	-0.78843	-80.1375	-0.78347	-92.9024
-0.758	-75.5111	-0.75871	-79.775	-0.75292	-92.6585
-0.75882	-75.4333	-0.75827	-79.775	-0.75261	-92.6463
-0.75825	-75.3667	-0.75827	-79.7625	-0.75231	-92.6463
-0.75882	-75.437	-0.75827	-79.75	-0.75441	-92.6342
-0.75882	-75.2963	-0.75827	-79.7375	-0.75441	-92.6342
-0.72799	-74.5593	-0.72832	-79.3625	-0.72223	-92.3658
-0.72766	-74.6037	-0.72832	-79.35	-0.72195	-92.3537
-0.72799	-74.5111	-0.72832	-79.35	-0.72195	-92.3537
-0.72747	-74.463	-0.72832	-79.325	-0.72195	-92.3415
-0.72799	-74.5741	-0.72801	-79.325	-0.72195	-92.3415
-0.69745	-73.7185	-0.69851	-78.9375	-0.69259	-92.0366
-0.69763	-73.7593	-0.69851	-78.925	-0.69259	-92.0366
-0.69763	-73.8037	-0.69851	-78.9125	-0.69259	-92.0366
-0.69756	-73.6482	-0.69816	-78.9125	-0.69213	-92.0366
-0.69763	-73.6111	-0.69808	-78.9	-0.69203	-92.0244
-0.66788	-72.9296	-0.6683	-78.45	-0.66319	-91.7195
-0.66765	-72.9222	-0.6683	-78.4375	-0.66249	-91.7195
-0.66788	-72.8815	-0.6678	-78.4375	-0.66233	-91.7073
-0.66788	-72.9963	-0.6677	-78.4375	-0.66218	-91.6951
-0.66741	-73.0222	-0.6676	-78.4375	-0.66202	-91.6951
-0.6375	-71.9556	-0.63893	-78.0125	-0.63283	-91.3902
-0.6375	-71.937	-0.63809	-78	-0.63264	-91.3902
-0.6374	-71.9037	-0.63791	-77.9875	-0.63245	-91.3781
-0.6375	-71.9037	-0.63774	-77.975	-0.63226	-91.3658
-0.63707	-71.9037	-0.63893	-77.975	-0.63362	-91.3658
-0.60732	-70.8778	-0.60778	-77.525	-0.6031	-91.0244
-0.60809	-70.8593	-0.60759	-77.5125	-0.60282	-91.0122
-0.60809	-70.8667	-0.60744	-77.5	-0.60255	-91
-0.60699	-70.8704	-0.60744	-77.4875	-0.60243	-90.9878
-0.60809	-70.9037	-0.60744	-77.475	-0.60243	-90.9878
-0.5774	-69.7667	-0.57747	-77	-0.57271	-90.6585
-0.57678	-69.7444	-0.57704	-76.9875	-0.57225	-90.6463
-0.5774	-69.7	-0.57701	-76.975	-0.57211	-90.6219
-0.57679	-69.7037	-0.57701	-76.9625	-0.57211	-90.6098
-0.5774	-69.7889	-0.57701	-76.975	-0.57211	-90.6098
-0.54717	-68.4667	-0.54849	-76.4875	-0.54281	-90.2561
-0.54717	-68.5667	-0.54799	-76.4625	-0.54281	-90.2317
-0.54654	-68.5296	-0.54749	-76.4375	-0.54281	-90.2317
-0.54717	-68.4704	-0.54723	-76.4375	-0.54281	-90.2439
-0.54681	-68.5593	-0.54723	-76.425	-0.54234	-90.2317
-0.51716	-67.0963	-0.51754	-75.85	-0.51346	-89.8415
-0.51754	-67.2148	-0.51726	-75.85	-0.51346	-89.8293
-0.51696	-67.1556	-0.51726	-75.8375	-0.51297	-89.8293
-0.51754	-67.1556	-0.51726	-75.825	-0.51287	-89.8293
-0.51754	-67.3222	-0.51726	-75.825	-0.51276	-89.8171
-0.4875	-65.7815	-0.48731	-75.2375	-0.4842	-89.4268
-0.48791	-65.7444	-0.48731	-75.225	-0.48343	-89.4146
-0.48791	-65.7185	-0.48731	-75.2125	-0.48326	-89.4024
-0.48713	-65.7741	-0.48707	-75.2	-0.48308	-89.4024
-0.48791	-65.7519	-0.48701	-75.2	-0.4829	-89.3902
-0.45758	-64.1667	-0.45776	-74.5875	-0.45402	-88.9634
-0.45724	-64.1185	-0.45776	-74.5625	-0.45374	-88.9512
-0.45758	-64.1148	-0.45746	-74.55	-0.45345	-88.939
-0.45728	-64.1	-0.45739	-74.55	-0.45317	-88.9268
-0.45758	-64.1704	-0.45732	-74.5375	-0.45418	-88.9146
-0.42737	-62.4296	-0.4285	-73.8875	-0.42456	-88.4512
-0.42767	-62.3556	-0.42775	-73.8625	-0.42427	-88.4268
-0.42767	-62.2296	-0.42756	-73.85	-0.42398	-88.4146
-0.42734	-62.4111	-0.42738	-73.8375	-0.42394	-88.4024
-0.42767	-62.4667	-0.4272	-73.825	-0.42394	-88.3902
-0.39793	-60.4741	-0.39861	-73.1375	-0.39458	-87.9024
-0.39757	-60.463	-0.39778	-73.125	-0.39415	-87.9024
-0.39793	-60.4148	-0.3976	-73.1	-0.39409	-87.8902
-0.39744	-60.4074	-0.39742	-73.1	-0.39409	-87.8781
-0.39793	-60.4074	-0.39724	-73.0875	-0.39409	-87.8658
-0.36782	-58.3741	-0.36834	-72.2875	-0.36489	-87.3293
-0.36779	-58.3556	-0.36811	-72.275	-0.36467	-87.3171
-0.36782	-58.3407	-0.36788	-72.2625	-0.36467	-87.3049
-0.36782	-58.3667	-0.36765	-72.25	-0.36467	-87.2927
-0.36775	-58.2074	-0.36935	-72.25	-0.36467	-87.2927
-0.33812	-55.8852	-0.33853	-71.3625	-0.33517	-86.6707
-0.33878	-55.8667	-0.33826	-71.3375	-0.33517	-86.6707
-0.33792	-55.9444	-0.33814	-71.325	-0.33517	-86.6463
-0.33878	-55.8037	-0.33814	-71.3125	-0.33517	-86.6219
-0.33878	-55.7741	-0.33814	-71.3125	-0.33481	-86.6219
-0.30897	-53.2185	-0.30847	-70.35	-0.3057	-85.9634
-0.30842	-53.1519	-0.30847	-70.3375	-0.3057	-85.939
-0.30897	-53.163	-0.30847	-70.3125	-0.3057	-85.939
-0.30814	-53.1741	-0.30847	-70.3	-0.30546	-85.9268
-0.30897	-53.0444	-0.30812	-70.3	-0.30541	-85.9268
-0.27903	-50.3444	-0.27879	-69.2	-0.27658	-85.1951
-0.27866	-50.2296	-0.27879	-69.175	-0.27658	-85.1585
-0.27903	-50.1926	-0.27879	-69.15	-0.2759	-85.1463
-0.27903	-50.2	-0.27838	-69.1375	-0.27575	-85.1342
-0.27855	-50.2	-0.27827	-69.125	-0.27559	-85.1219
-0.24856	-47.0593	-0.24905	-67.825	-0.24657	-84.2195
-0.24856	-46.9667	-0.24872	-67.8125	-0.24638	-84.2073
-0.24861	-46.8741	-0.24864	-67.8	-0.24618	-84.1951
-0.24856	-46.8296	-0.24855	-67.7875	-0.24599	-84.1829
-0.24838	-46.8407	-0.24847	-67.775	-0.24736	-84.1829
-0.21897	-43.3185	-0.21924	-66.275	-0.21733	-83.1463
-0.21933	-43.0556	-0.219	-66.2375	-0.21702	-83.1219
-0.21852	-42.9889	-0.21877	-66.2125	-0.2167	-83.1098
-0.21933	-43.137	-0.21853	-66.1875	-0.21658	-83.0854
-0.21871	-43.0889	-0.22022	-66.1625	-0.21658	-83.0732
-0.18897	-38.8963	-0.18902	-64.2625	-0.18711	-81.8049
-0.18941	-38.8481	-0.18873	-64.2375	-0.18686	-81.7805
-0.18941	-38.8556	-0.18856	-64.2125	-0.18686	-81.7683
-0.18874	-38.7333	-0.18856	-64.2	-0.18686	-81.7561
-0.18941	-38.8556	-0.18856	-64.175	-0.18686	-81.7439
-0.1598	-34.1778	-0.15902	-61.8	-0.15747	-80.2073
-0.15893	-34.0815	-0.15902	-61.75	-0.15747	-80.1707
-0.1598	-34.1074	-0.15902	-61.7125	-0.15747	-80.1342
-0.15882	-34.0815	-0.15902	-61.6875	-0.15747	-80.1098
-0.1598	-34.1333	-0.15859	-61.6875	-0.15698	-80.0854
-0.12916	-29.0111	-0.12924	-58.4125	-0.12787	-77.9024
-0.12881	-28.7852	-0.12924	-58.3625	-0.12787	-77.8537
-0.12916	-28.7704	-0.12875	-58.3125	-0.12733	-77.8293
-0.12895	-28.7037	-0.12862	-58.275	-0.1272	-77.8049
-0.12916	-28.6815	-0.1285	-58.25	-0.12707	-77.7805
-0.0991	-22.9037	-0.0997	-53.925	-0.09866	-74.6951
-0.0991	-22.7778	-0.0997	-53.725	-0.09866	-74.6098
-0.09871	-22.7519	-0.0997	-53.575	-0.09787	-74.5488
-0.0991	-22.837	-0.0997	-53.475	-0.09771	-74.4878
-0.09873	-22.737	-0.0988	-53.3875	-0.09755	-74.4634
-0.08895	-20.8407	-0.08876	-51.075	-0.08761	-73.1098
-0.0891	-20.7667	-0.08861	-51.0125	-0.08761	-73.1219
-0.0891	-20.7741	-0.08861	-50.9625	-0.08761	-73.0976
-0.08853	-20.8444	-0.08861	-50.925	-0.08761	-73.0244
-0.0891	-20.8556	-0.08861	-50.9	-0.08742	-72.9878
-0.07861	-18.5963	-0.07858	-48.375	-0.07751	-71.1463
-0.07903	-18.4852	-0.07851	-48.3125	-0.07728	-71.0976
-0.07851	-18.4593	-0.07843	-48.25	-0.07727	-71.0488
-0.07903	-18.3296	-0.07836	-48.2125	-0.07727	-71.0244
-0.07861	-18.263	-0.07862	-48.1875	-0.07727	-70.9878
-0.0687	-16.3185	-0.06865	-45.2375	-0.06768	-68.8658
-0.06853	-16.1556	-0.06865	-45.1625	-0.06758	-68.8171
-0.0687	-16.1333	-0.06865	-45.1	-0.06749	-68.7683
-0.0687	-16.1741	-0.06851	-45.05	-0.06749	-68.7439
-0.06852	-16.1704	-0.06849	-45	-0.06749	-68.7195
-0.05875	-14.0778	-0.0584	-41.45	-0.05843	-66.1463
-0.05886	-13.8222	-0.05835	-41.3625	-0.0579	-66.061
-0.05868	-13.9407	-0.05835	-41.2875	-0.05778	-65.9878
-0.05886	-13.937	-0.05835	-41.225	-0.05766	-65.939
-0.05886	-13.8926	-0.05835	-41.175	-0.05755	-65.9024
-0.04883	-11.5704	-0.0488	-36.825	-0.04805	-62.4878
-0.04883	-11.5556	-0.04868	-36.7	-0.04805	-62.3781
-0.0487	-11.6111	-0.04856	-36.6	-0.04805	-62.2927
-0.04883	-11.5407	-0.04852	-36.525	-0.04769	-62.2317
-0.04864	-11.5185	-0.04852	-36.4625	-0.04761	-62.1829
-0.0386	-9.28889	-0.03863	-31.0875	-0.03743	-57.4878
-0.03835	-9.10741	-0.03863	-30.9375	-0.03733	-57.3293
-0.0386	-9.25926	-0.03828	-30.8	-0.03733	-57.1951
-0.03833	-9.18519	-0.03821	-30.7	-0.03733	-57.0854
-0.0386	-9.13333	-0.03813	-30.625	-0.03733	-57.0122
-0.02843	-6.9	-0.02864	-24.5625	-0.0278	-50.6219
-0.02862	-6.92593	-0.02864	-24.3875	-0.02763	-50.439
-0.02824	-6.81111	-0.02864	-24.2375	-0.02754	-50.2805
-0.02862	-6.71111	-0.02864	-24.1125	-0.02754	-50.1463
-0.02862	-6.61852	-0.02834	-24.025	-0.02754	-50.061
-0.01851	-4.47407	-0.01878	-16.775	-0.01792	-40.3415
-0.01844	-4.45185	-0.01861	-16.55	-0.01775	-40.0366
-0.01851	-4.24815	-0.01852	-16.375	-0.01758	-39.7805
-0.01851	-4.13333	-0.01852	-16.225	-0.0175	-39.5732
-0.01831	-4.22963	-0.01852	-16.1125	-0.0175	-39.4146
-0.00895	-1.90741	-0.00862	-7.9875	-0.00844	-23.5976
-0.00895	-1.96296	-0.00846	-7.7375	-0.00828	-23.0854
-0.00837	-1.96296	-0.0083	-7.5375	-0.00813	-22.6585
-0.00895	-1.76296	-0.00825	-7.375	-0.00923	-22.2927
-0.00833	-1.7037	-0.00825	-7.25	-0.00923	-22
0.000664193	0.42222	0.000743471	1.24725	0.000696183	4.67073
0.00101	0.48148	0.000826647	1.5	0.0012	5.60976
0.000664193	0.51481	0.000909906	1.6875	0.0013	6.37805
0.000664193	0.55926	0.000992999	1.85	0.0014	6.9878
0.00153	0.55185	0.00040694	1.975	0.000696183	7.4878
0.01113	2.97407	0.01099	10.7	0.01096	30.1951
0.01149	3.02963	0.01118	10.9	0.01113	30.6707
0.01113	3.07407	0.01124	11.0625	0.01122	31.0366
0.0115	3.06296	0.01124	11.2	0.01122	31.3415
0.01113	3.1963	0.01124	11.3125	0.01122	31.5732
0.02107	5.42963	0.02073	19.1625	0.02077	44.1829
0.02137	5.49259	0.02088	19.3375	0.02097	44.439
0.02107	5.42963	0.02094	19.4875	0.02112	44.6585
0.02107	5.41852	0.02094	19.6	0.02112	44.8293
0.02158	5.6037	0.02094	19.7	0.02112	44.9756
0.03161	7.89259	0.03097	26.625	0.03085	53.1463
0.03161	7.94815	0.03115	26.7875	0.031	53.3293
0.03145	7.91481	0.03122	26.9	0.0311	53.4756
0.03161	8.03333	0.03122	27	0.0311	53.5854
0.03161	8.07778	0.03122	27.075	0.0311	53.6829
0.04124	10.237	0.04082	32.8375	0.04081	59.1951
0.04129	10.2333	0.04099	32.95	0.04098	59.3171
0.04124	10.3741	0.04116	33.05	0.04115	59.4146
0.0417	10.4482	0.04121	33.125	0.04002	59.5
0.04124	10.3407	0.04121	33.2	0.04002	59.561
0.05169	12.5926	0.05066	38.1875	0.0508	63.7683
0.05134	12.6852	0.05129	38.3125	0.0508	63.8781
0.05134	12.7667	0.05144	38.4125	0.05121	63.9756
0.05219	12.7852	0.05158	38.4875	0.0513	64.0366
0.05134	12.8963	0.05173	38.55	0.05139	64.0976
0.06181	14.963	0.06138	42.7375	0.0614	67.2561
0.06181	15.1	0.06138	42.8	0.0614	67.3171
0.06202	15.1481	0.06169	42.8625	0.0614	67.3658
0.06181	15.1667	0.06177	42.9125	0.06169	67.4146
0.0621	15.1815	0.06184	42.95	0.06175	67.4512
0.07185	17.2037	0.07154	46.2625	0.07151	69.7561
0.07204	17.2963	0.07154	46.35	0.0716	69.8049
0.07185	17.363	0.07154	46.4	0.0716	69.8537
0.07199	17.4185	0.07191	46.4375	0.0716	69.8902
0.07185	17.4296	0.072	46.4625	0.0716	69.9268
0.08216	19.4556	0.08147	49.2375	0.08137	71.8415
0.08175	19.4407	0.08147	49.2875	0.0816	71.8781
0.08175	19.4259	0.08147	49.325	0.08166	71.9146
0.08205	19.4593	0.08147	49.35	0.08166	71.939
0.08175	19.4593	0.0818	49.375	0.08166	71.9634
0.09228	21.7852	0.09189	51.7375	0.09119	73.5488
0.0921	21.8778	0.09204	51.775	0.09133	73.5732
0.0921	21.8185	0.09204	51.8125	0.09146	73.5976
0.09224	21.7741	0.09204	51.8375	0.09146	73.6098
0.0921	21.7778	0.09204	51.8625	0.09146	73.6463
0.10191	23.7333	0.10175	53.85	0.10009	75.1829
0.10148	23.8111	0.10187	53.8875	0.10041	75.0244
0.10214	23.863	0.10198	53.925	0.10073	74.9512
0.10148	23.9185	0.10198	53.95	0.09862	74.9268
0.10231	23.7667	0.10198	53.9625	0.09862	74.939
0.10239	23.8	0.10224	54.025	0.10105	75.0122
0.10234	23.7185	0.10208	54.025	0.10109	75
0.10239	23.6852	0.10204	54.0375	0.1011	75.0122
0.10239	23.8	0.102	54.0375	0.10111	75.0122
0.10217	23.8296	0.10224	54.0375	0.10105	75
0.13222	29.6407	0.13103	58.4	0.13036	77.9756
0.13222	29.7481	0.13127	58.475	0.13065	78.0122
0.13228	29.7037	0.13151	58.5375	0.13087	78.0366
0.13222	29.7556	0.13175	58.575	0.13087	78.061
0.13219	29.6074	0.12997	58.6125	0.13087	78.0854
0.16192	34.8407	0.16114	61.6375	0.16001	80.1463
0.16063	34.8037	0.16158	61.75	0.16001	80.1829
0.16192	34.8259	0.16158	61.8	0.16001	80.2073
0.16063	34.9	0.16158	61.85	0.16001	80.2317
0.16063	34.9037	0.16158	61.8625	0.16035	80.2439
0.19114	39.2296	0.19115	64.2125	0.18953	81.7927
0.19139	39.3	0.19115	64.2375	0.18953	81.8049
0.19114	39.3074	0.19115	64.2625	0.19003	81.8293
0.19152	39.5815	0.19115	64.2875	0.19015	81.8537
0.19114	39.2	0.19137	64.3	0.19027	81.8537
0.22143	43.4519	0.22059	66.15	0.21916	83.0854
0.22143	43.5296	0.22059	66.175	0.21936	83.1098
0.22187	43.5444	0.22059	66.1875	0.21956	83.1342
0.22143	43.5593	0.22124	66.2	0.21976	83.1342
0.22159	43.563	0.22136	66.2	0.21832	83.1342
0.25118	47.163	0.24998	67.7375	0.24856	84.1342
0.25012	47.237	0.25068	67.75	0.24894	84.1585
0.25157	47.337	0.25085	67.7625	0.24933	84.1829
0.25012	47.4111	0.25102	67.775	0.24935	84.1951
0.25012	47.4926	0.2512	67.7875	0.24935	84.1951
0.28112	50.4481	0.28071	69.075	0.27763	84.9512
0.28112	50.4	0.28095	69.1	0.27827	85.0122
0.28193	50.5074	0.28118	69.1125	0.2784	85.0366
0.28112	50.5333	0.27955	69.125	0.2784	85.061
0.28196	50.563	0.27955	69.1125	0.2784	85.0732
0.3102	53.2926	0.31049	70.275	0.30835	85.8537
0.31155	53.3444	0.31105	70.2625	0.30835	85.8537
0.3102	53.2667	0.31118	70.2625	0.30835	85.8781
0.31166	53.3444	0.31118	70.275	0.30849	85.8902
0.3102	53.537	0.31118	70.275	0.30852	85.8902
0.34152	56.0778	0.34098	71.25	0.33717	86.561
0.34152	56.0593	0.34098	71.2625	0.33783	86.561
0.34172	55.9741	0.34098	71.275	0.33799	86.5732
0.34152	55.9963	0.34098	71.275	0.33814	86.5732
0.34178	55.9778	0.34131	71.275	0.3383	86.5732
0.36478	58.4815	0.3699	72.1625	0.36721	87.1951
0.40053	60.5889	0.37048	72.175	0.36746	87.2073
0.40127	60.5852	0.37062	72.1875	0.3677	87.2195
0.40053	60.6482	0.37077	72.1875	0.3678	87.2073
0.40115	60.637	0.37091	72.1875	0.3678	87.2073
0.40053	60.5889	0.40016	73	0.39726	87.7805
0.43095	62.4926	0.40041	73	0.3975	87.7805
0.4312	62.5259	0.40066	73	0.3975	87.7805
0.43095	62.5667	0.40078	73.0125	0.3975	87.7805
0.43095	62.7185	0.40078	73.0125	0.3975	87.7805
0.4313	62.5074	0.43037	73.7375	0.42712	88.3049
0.46083	64.3	0.43046	73.7375	0.42712	88.3171
0.46083	64.3037	0.43046	73.7	0.42712	88.2927
0.46094	64.263	0.43046	73.675	0.42769	88.3049
0.46083	64.2519	0.43046	73.7125	0.42781	88.3049
0.46093	64.2481	0.45973	74.4375	0.4558	88.7805
0.49087	65.5333	0.45973	74.4375	0.4558	88.7927
0.49043	65.6518	0.45973	74.4375	0.45655	88.8049
0.49106	65.8444	0.4603	74.45	0.45672	88.8049
0.49043	65.7222	0.46041	74.4375	0.45689	88.8049
0.49043	65.7667	0.48944	75.1125	0.48637	89.3049
0.52051	67.3333	0.48944	75.1	0.48662	89.2927
0.52083	67.2667	0.49026	75.1125	0.48687	89.2927
0.52004	67.1778	0.49044	75.1125	0.48712	89.2927
0.52121	67.337	0.49062	75.1	0.48526	89.2805
0.52004	67.2593	0.52009	75.7125	0.51616	89.6951
0.55045	68.5482	0.52031	75.7125	0.51657	89.7073
0.55077	68.6148	0.52053	75.7	0.51657	89.7073
0.55045	68.6148	0.51901	75.7	0.51657	89.7073
0.55102	68.6111	0.51901	75.7	0.51657	89.7073
0.55045	68.5926	0.55001	76.2625	0.54512	90.1342
0.58107	70.0407	0.55028	76.275	0.54512	90.1219
0.58107	69.9407	0.55028	76.2875	0.54512	90.1219
0.58129	69.9074	0.55028	76.3	0.54512	90.1098
0.58107	69.8926	0.55028	76.3	0.54542	90.1098
0.58115	69.8815	0.57953	76.8375	0.57471	90.4756
0.61132	70.9	0.57953	76.8375	0.57471	90.4756
0.61116	71.0111	0.58014	76.85	0.57504	90.4756
0.61112	70.9296	0.58029	76.8375	0.57512	90.4756
0.6111	71.0519	0.58045	76.8375	0.57519	90.4756
0.61116	70.7037	0.60956	77.3125	0.60492	90.8658
0.6403	72.037	0.60977	77.3375	0.60511	90.8658
0.6411	72.0519	0.60999	77.35	0.6053	90.8537
0.6403	72.0444	0.6102	77.3375	0.6055	90.8537
0.6413	71.8704	0.60874	77.3375	0.60481	90.8537
0.6403	71.8037	0.63972	77.825	0.63436	91.2195
0.67017	73.0556	0.64008	77.825	0.63475	91.2195
0.6708	73.0593	0.64026	77.825	0.63479	91.2195
0.67017	73.1148	0.64026	77.825	0.63479	91.2195
0.67121	73.1333	0.64026	77.825	0.63479	91.2195
0.67017	73.0519	0.67002	78.2625	0.66498	91.5732
0.70102	73.4037	0.67002	78.275	0.66498	91.5488
0.69818	73.6185	0.67002	78.275	0.66498	91.5366
0.70089	73.8778	0.67002	78.2625	0.66498	91.5366
0.69818	73.937	0.67051	78.2625	0.6652	91.5244
0.69818	73.9852	0.69931	78.7	0.69354	91.8658
0.72986	74.7148	0.69931	78.7125	0.69354	91.8658
0.72986	74.7185	0.69931	78.7125	0.69456	91.8658
0.7307	74.7778	0.69986	78.7125	0.69476	91.8658
0.72986	74.7667	0.69998	78.725	0.69496	91.8537
0.73061	74.7037	0.72855	79.15	0.72343	92.1707
0.76008	75.3963	0.72959	79.15	0.72373	92.1829
0.75922	75.4889	0.72981	79.1375	0.72402	92.1829
0.76048	75.4593	0.73004	79.1375	0.72195	92.1829
0.75922	75.4481	0.72855	79.1375	0.72195	92.1951
0.76016	75.2815	0.75902	79.55	0.75272	92.4634
0.78993	76.2778	0.75929	79.55	0.75321	92.4756
0.78926	76.337	0.75955	79.55	0.75349	92.4756
0.78926	76.2481	0.75955	79.55	0.75349	92.4634
0.79018	76.2259	0.75955	79.55	0.75349	92.4634
0.78926	76.2222	0.78869	79.9375	0.78329	92.6463
0.8189	76.9926	0.7891	79.9375	0.78329	92.7073
0.82	76.9741	0.7891	79.95	0.78329	92.7317
0.8189	77.0111	0.7891	79.9375	0.78329	92.7317
0.81992	76.9815	0.7891	79.9375	0.78345	92.7317
0.8189	76.9741	0.81845	80.2875	0.81182	93
0.84855	77.4259	0.81845	80.3	0.81182	93.0122
0.84895	77.4778	0.81845	80.325	0.81182	93.0122
0.84855	77.4926	0.8189	80.3	0.81244	93.0122
0.84855	77.463	0.81901	80.3125	0.81259	93.0122
0.84952	77.463	0.84721	80.725	0.84034	93.2561
0.87783	78.0704	0.84787	80.725	0.84034	93.2683
0.87716	78.063	0.84802	80.7125	0.84034	93.2683
0.87837	78.0185	0.84816	80.7125	0.84034	93.2805
0.87716	77.9889	0.84831	80.7125	0.84131	93.2683
0.87716	78.0778	0.87701	81.075	0.86996	93.5244
0.90673	78.6037	0.87728	81.0625	0.86996	93.5244
0.906	78.5963	0.87754	81.0625	0.87056	93.5244
0.906	78.6037	0.87758	81.0625	0.8707	93.5
0.90739	78.6444	0.87758	81.0625	0.87084	93.5
0.906	78.6037	0.90622	81.4	0.89841	93.7561
0.93486	79.1741	0.90626	81.4125	0.89863	93.7561
0.93597	79.1889	0.90626	81.4125	0.89885	93.7561
0.93486	79.1926	0.90626	81.4125	0.89907	93.7439
0.93591	79.1815	0.90626	81.4125	0.89749	93.7561
0.93486	79.2593	0.93442	81.7625	0.92723	94
0.9637	79.563	0.93442	81.775	0.92764	94
0.96444	79.5704	0.93442	81.775	0.92786	94
0.9637	79.563	0.93503	81.775	0.92786	94
0.9637	79.5333	0.93515	81.775	0.92786	93.9878
0.96445	79.6593	0.96244	82.0875	0.95431	94.2317
1.00171	80.2963	0.96325	82.075	0.95485	94.2561
1.00093	80.263	0.9634	82.0625	0.95539	94.2561
1.00181	80.1111	0.96356	82.0625	0.95168	94.2439
1.00093	80.2778	0.96244	82.075	0.95168	94.2683
1.00182	80.0222	0.99788	82.3625	0.98686	94.4756
		0.99958	82.375	0.98727	94.4878
		1.00002	82.375	0.98727	94.4878
		1.00046	82.3875	0.98727	94.4756
		1.0009	82.3875	0.98727	94.4756
