# Supplementary material for: Cork-derived magnetic composites: a preliminary study
Source: Royal Society of Chemistry journal article supplement (doi:10.1039/d4su00442f), 2024-12-11
Supplement: d4su00442f4.xlsx [file d4su00442f4.xlsx]

## Sheet: Figure 5a
	large powder	fine powder
6	3	12
9	13	17
15	12	11

## Sheet: Figure 5b
	large powder	fine powder
6	4	14
9	23	20
15	10	8
