# Supplementary material for: Cork-derived magnetic composites: a preliminary study
Source: Royal Society of Chemistry journal article supplement (doi:10.1039/d4su00442f), 2024-12-11
Supplement: d4su00442f5.xlsx [file d4su00442f5.xlsx]

## Sheet: Fig 6a
Relative Pressure (p/p°)	Quantity Adsorbed (cm³/g STP)
0.06474	-3.56046
0.09472	-3.74565
0.12958	-3.71702
0.15472	-3.85622
0.19428	-3.49411
0.21959	-3.49841
0.24454	-3.4443
0.26954	-3.33572
0.29447	-3.16999
0.3194	-2.94092
0.33957	-2.84255
0.35949	-2.69889
0.38003	-2.49778
0.41936	-1.31635
0.46038	0.141245
0.5002	1.67342
0.54004	3.37938
0.58013	5.29894
0.62011	7.35156
0.66003	9.61058
0.70003	12.0853
0.74017	14.7676
0.77985	17.666
0.82003	20.8515
0.85997	24.3809
0.89002	27.2934
0.90003	28.2974
0.90992	29.3511
0.9202	30.5044
0.92988	31.7367
0.93991	33.1635
0.94975	34.8117
0.95502	35.8401
0.96007	36.9705
0.96487	38.2223
0.96983	39.6702
0.9746	41.5431
0.97987	43.9708
0.98222	45.5326
0.98522	47.2145
0.98713	48.5518
0.99015	50.3666
0.99132	51.4976
0.99439	53.5354
0.99715	73.4979
0.99784	92.7679
0.99719	66.2135
0.98641	52.2754
0.97102	46.591
0.95519	41.9791
0.94084	36.5961
0.93981	35.7497
0.92928	33.0518
0.90454	28.8191

## Sheet: Fig 6b
Relative Pressure (p/p°)	Quantity Adsorbed (cm³/g STP)
0.07491	7.24061
0.09001	7.48923
0.10998	7.79376
0.13497	8.16042
0.14994	8.43671
0.17491	8.86987
0.19987	9.33033
0.22479	9.8699
0.2498	10.4489
0.27472	11.0556
0.29977	11.7284
0.31979	12.2923
0.33976	12.9178
0.37982	14.2099
0.41996	15.6259
0.45998	17.1942
0.50004	18.9125
0.54	20.7696
0.57999	22.796
0.62	24.9532
0.66003	27.3097
0.70002	29.8544
0.74001	32.5929
0.78	35.5346
0.8197	38.8067
0.85977	42.5235
0.89003	45.6714
0.90005	46.9222
0.91014	48.1539
0.9198	49.5502
0.92999	51.0711
0.93989	52.8319
0.94989	54.8875
0.95479	56.3623
0.95981	58.0728
0.9649	59.9843
0.96969	62.2051
0.97475	64.9867
0.97961	68.3044
0.98288	70.3231
0.98448	71.8373
0.98815	73.7664
0.9977	90.7429
0.99793	102.254
0.99079	78.1261
0.97477	72.7973
0.95438	67.7375
0.93356	63.8824
0.9136	60.2405
0.91091	58.7968
0.90074	53.5956
0.88962	50.0662
0.86139	45.4656
0.82326	40.874
0.78063	36.9526
0.74071	33.8021
0.70032	30.9408
0.66012	28.3414
0.62021	25.954
0.58012	23.7847
0.54025	21.7687
0.50019	19.8679
0.4604	17.8008
0.41999	15.9099
0.38004	14.3772
0.3402	13.0594
0.3002	11.8442
0.25014	10.5153
0.2002	9.39788
0.15054	8.49189
0.10024	7.66451
0.100241	7.66451

## Sheet: Fig 6c
Average Radius (Å)	Incremental Pore Area (m²/g)	Cumulative Pore Area (m²/g)
82.9944	1.52362	1.52362
65.5786	2.44834	3.97196
53.3391	2.83022	6.80218
44.9789	3.16564	9.96782
38.8374	3.49823	13.4661
34.1222	3.78739	17.2534
30.383	3.95117	21.2046
27.3184	4.03802	25.2426
24.7516	4.21934	29.462
22.5634	4.04139	33.5034
20.6665	3.8624	37.3658

## Sheet: Fig 6d
Average Radius (Å)	Incremental Pore Area (m²/g)	Cumulative Pore Area (m²/g)
--	--	--
--	--	--
82.9223	1.51025	6.50666
65.472	2.39977	8.90644
53.3329	2.71616	11.6226
44.9729	3.00395	14.6265
38.8281	3.36099	17.9875
34.1218	3.6828	21.6703
30.3773	3.90908	25.5794
27.3091	4.03531	29.6147
24.7466	4.24786	33.8626
22.5578	4.22782	38.0904
20.653	4.21529	42.3057
18.9751	4.06748	46.3732
17.4745	3.72544	50.0986
16.1153	3.36352	53.4621
15.2123	1.62657	55.0887
14.6137	1.23276	56.3214
13.9549	1.3088	57.6302
13.2576	0.789752	58.42
12.5825	0.429571	58.8496
--	--	--
--	--	--
--	--	--
--	--	--
--	--	--
--	--	--
--	--	--
--	--	--
--	--	--
--	--	--
--	--	--
--	--	--
--	--	--
--	--	--
--	--	--
--	--	--

## Sheet: Fig 6e
Average Radius (Å)	Incremental Pore Volume (cm³/g)	Cumulative Pore Volume (cm³/g)
82.9944	0.00632261	0.00632261
65.5786	0.00802793	0.0143505
53.3391	0.00754806	0.0218986
44.9789	0.00711934	0.0290179
38.8374	0.00679312	0.0358111
34.1222	0.00646169	0.0422727
30.383	0.00600242	0.0482752
27.3184	0.00551561	0.0537908
24.7516	0.00522177	0.0590125
22.5634	0.00455938	0.0635719
20.6665	0.00399111	0.067563

## Sheet: Fig 6f
Average Radius (Å)	Incremental Pore Volume (cm³/g)	Cumulative Pore Volume (cm³/g)
--	--	--
--	--	--
82.9223	0.00626167	0.0828357
65.472	0.0078559	0.0906916
53.3329	0.00724304	0.0979346
44.9729	0.00675481	0.104689
38.8281	0.00652504	0.111214
34.1218	0.00628318	0.117498
30.3773	0.00593737	0.123435
27.3091	0.00551004	0.128945
24.7466	0.00525601	0.134201
22.5578	0.00476851	0.13897
20.653	0.00435292	0.143322
18.9751	0.00385903	0.147182
17.4745	0.00325501	0.150437
16.1153	0.00271021	0.153147
15.2123	0.00123719	0.154384
14.6137	0.000900755	0.155285
13.9549	0.000913209	0.156198
13.2576	0.00052351	0.156721
12.5825	0.000270253	0.156992
