# Supplementary material for: Cork-derived magnetic composites: a preliminary study
Source: Royal Society of Chemistry journal article supplement (doi:10.1039/d4su00442f), 2024-12-11
Supplement: d4su00442f6.xlsx [file d4su00442f6.xlsx]

## Sheet: Foglio1
FC4_a			FC4_b			FC4_c
1.0002	4.13117		1.00133	5.33076		0.99336	8.91974
1.0015	4.134		1.00475	5.33675		0.99336	8.92079
1.00477	4.1276		1.0055	5.33688		0.99336	8.92112
1.00551	4.10724		1.00553	5.34561		0.95963	8.90883
1.00593	4.1129		1.00553	5.33985		0.95963	8.91089
1.006	4.10621		1.00235	5.32579		0.95963	8.9162
1.00478	4.10458		1.00207	5.32534		0.95963	8.9189
1.00465	4.10771		0.99328	5.33851		0.95947	8.9196
1.00159	4.10894		0.99298	5.33688		0.93093	8.90318
1.0014	4.12439		0.98142	5.33396		0.93093	8.90578
0.99606	4.11699		0.98142	5.33508		0.93093	8.90834
0.99594	4.08946		0.9743	5.34111		0.93073	8.91197
0.98923	4.08762		0.9743	5.34207		0.93068	8.91471
0.98923	4.11923		0.96796	5.33229		0.90222	8.9156
0.98253	4.12171		0.96796	5.32949		0.90222	8.91853
0.98253	4.12234		0.96163	5.32802		0.90222	8.91871
0.97776	4.15045		0.96163	5.3282		0.90175	8.91707
0.97776	4.13836		0.95516	5.32667		0.90165	8.91637
0.97416	4.11088		0.95516	5.3249		0.87384	8.92442
0.97416	4.09779		0.94863	5.33269		0.87332	8.91946
0.97074	4.1036		0.94863	5.3294		0.87319	8.91684
0.96806	4.10795		0.94232	5.32663		0.87307	8.91787
0.96721	4.09715		0.93718	5.32727		0.87294	8.92099
0.96431	4.09864		0.93584	5.33844		0.84378	8.92829
0.96367	4.11085		0.93042	5.3392		0.8436	8.92902
0.96059	4.11454		0.9293	5.32155		0.84341	8.9278
0.9602	4.11396		0.9237	5.31571		0.84334	8.92703
0.95683	4.10504		0.92302	5.32937		0.84334	8.92494
0.95657	4.1147		0.9169	5.33101		0.81489	8.90152
0.95311	4.12936		0.91629	5.32403		0.8145	8.9015
0.95311	4.13812		0.91012	5.32056		0.81439	8.9004
0.94953	4.14919		0.9099	5.30307		0.81439	8.89976
0.94952	4.14168		0.90347	5.28438		0.81439	8.90058
0.94595	4.13404		0.90347	5.28733		0.7848	8.89654
0.94595	4.15753		0.897	5.28699		0.7848	8.8941
0.94242	4.14679		0.897	5.27458		0.7848	8.89119
0.94242	4.12473		0.89036	5.28039		0.78466	8.89089
0.93861	4.13653		0.89036	5.29538		0.78462	8.88812
0.93861	4.14833		0.88396	5.29095		0.75568	8.86614
0.93514	4.11621		0.88396	5.2973		0.75568	8.8649
0.93514	4.10255		0.87754	5.29882		0.75568	8.86585
0.93141	4.11991		0.87754	5.29102		0.75506	8.86873
0.92854	4.12337		0.87114	5.28905		0.75494	8.8701
0.92779	4.11954		0.86599	5.28017		0.72617	8.85705
0.92475	4.11958		0.8646	5.27446		0.72559	8.85768
0.92411	4.12751		0.85913	5.26834		0.72547	8.85946
0.92094	4.12668		0.85801	5.27412		0.72535	8.85967
0.92044	4.12684		0.85229	5.29003		0.72617	8.85824
0.91712	4.14232		0.85149	5.28509		0.69645	8.84318
0.91691	4.14206		0.84542	5.28396		0.69615	8.84543
0.91332	4.13194		0.84472	5.29612		0.69585	8.84909
0.91316	4.12848		0.83851	5.29835		0.69791	8.85147
0.90951	4.14264		0.83788	5.29315		0.69791	8.84876
0.90949	4.15657		0.83159	5.28795		0.66669	8.84504
0.90587	4.17111		0.83127	5.29065		0.66628	8.83639
0.90587	4.14478		0.82473	5.29561		0.66602	8.83202
0.90236	4.14542		0.82465	5.30565		0.66602	8.83223
0.90236	4.13633		0.81796	5.30566		0.66602	8.83557
0.89873	4.12447		0.81796	5.29411		0.63657	8.84101
0.89872	4.13268		0.81125	5.29193		0.63629	8.83916
0.89511	4.13038		0.81125	5.29593		0.63629	8.83705
0.89511	4.12379		0.80448	5.27943		0.63629	8.83304
0.89143	4.10478		0.80448	5.25247		0.63629	8.8301
0.88863	4.13351		0.79776	5.24232		0.60644	8.80703
0.88776	4.13206		0.79776	5.23881		0.60644	8.80551
0.88478	4.13724		0.791	5.24605		0.60644	8.8048
0.88406	4.15221		0.791	5.25238		0.60644	8.80832
0.88099	4.12075		0.7844	5.25501		0.60615	8.81269
0.88053	4.09382		0.7844	5.26208		0.57682	8.78726
0.87714	4.07499		0.77788	5.27017		0.57682	8.78412
0.87692	4.08469		0.77788	5.27919		0.57682	8.7823
0.87342	4.08852		0.77108	5.27915		0.57682	8.78126
0.87342	4.09827		0.76601	5.26302		0.57632	8.78419
0.86971	4.10932		0.76449	5.26331		0.54735	8.76449
0.86971	4.10919		0.75906	5.27166		0.54735	8.76058
0.86613	4.11053		0.75797	5.26787		0.54735	8.75565
0.86613	4.11816		0.75204	5.25022		0.54679	8.74967
0.86241	4.11795		0.7511	5.23902		0.54667	8.74634
0.86241	4.14033		0.74508	5.24623		0.51778	8.73225
0.85873	4.15095		0.74445	5.24624		0.51725	8.73113
0.85873	4.13367		0.73811	5.24572		0.51713	8.72935
0.85508	4.10713		0.73791	5.24367		0.51701	8.72815
0.8522	4.11557		0.73115	5.24301		0.51689	8.73262
0.85139	4.12917		0.73105	5.24286		0.48743	8.72241
0.84833	4.12832		0.72457	5.23764		0.48721	8.72023
0.84773	4.11889		0.72457	5.23053		0.48699	8.71492
0.84448	4.11757		0.7178	5.22158		0.48677	8.70848
0.84401	4.13083		0.7178	5.21279		0.48831	8.70461
0.84066	4.12474		0.71119	5.21668		0.45772	8.68869
0.84036	4.11191		0.71119	5.22366		0.45741	8.6912
0.83678	4.12447		0.70469	5.21091		0.4571	8.69443
0.83663	4.12079		0.70469	5.20706		0.45927	8.69506
0.83295	4.10003		0.69789	5.20565		0.45927	8.69253
0.83295	4.08508		0.69788	5.19911		0.42817	8.66066
0.82911	4.10102		0.6912	5.20037		0.42782	8.6564
0.82911	4.10659		0.68593	5.19215		0.42754	8.65368
0.82526	4.09721		0.68456	5.19866		0.42754	8.65005
0.82526	4.0965		0.67894	5.21549		0.42754	8.64682
0.82158	4.09718		0.67777	5.21849		0.39769	8.61948
0.82158	4.0758		0.67192	5.21286		0.39769	8.61925
0.81784	4.07337		0.67106	5.20614		0.39769	8.61728
0.81784	4.10312		0.66494	5.19918		0.39769	8.61113
0.81419	4.11114		0.6642	5.19806		0.39725	8.60583
0.81419	4.09091		0.65793	5.19797		0.36809	8.55307
0.81055	4.11131		0.65733	5.20325		0.36809	8.5533
0.80776	4.11841		0.65094	5.21342		0.36809	8.55459
0.80689	4.10213		0.65074	5.21581		0.36768	8.5537
0.80393	4.10287		0.64415	5.21695		0.36759	8.55496
0.80311	4.08829		0.64415	5.21126		0.3386	8.49182
0.80005	4.06772		0.63752	5.19684		0.3386	8.49101
0.79929	4.0782		0.63752	5.18362		0.33801	8.49084
0.7962	4.10824		0.63069	5.18141		0.33788	8.48958
0.79562	4.12591		0.63069	5.1817		0.33775	8.48829
0.79232	4.10572		0.62416	5.18498		0.30953	8.42599
0.79185	4.10912		0.62416	5.19197		0.30856	8.42119
0.78843	4.10905		0.61758	5.20256		0.30835	8.41466
0.78815	4.09897		0.61758	5.20967		0.30814	8.41173
0.7846	4.11247		0.61087	5.19333		0.30953	8.41244
0.78453	4.12614		0.60544	5.17887		0.27864	8.35096
0.7809	4.11649		0.6042	5.17474		0.27835	8.35187
0.7809	4.11428		0.59846	5.18391		0.27806	8.3519
0.77724	4.09753		0.59774	5.19727		0.28013	8.3518
0.77723	4.10069		0.59142	5.19496		0.28013	8.35082
0.77357	4.09701		0.59105	5.19064		0.24858	8.24895
0.77357	4.08236		0.58453	5.20459		0.24816	8.2459
0.76986	4.08003		0.58453	5.21169		0.24798	8.24637
0.76698	4.08821		0.57779	5.20454		0.24798	8.24913
0.7661	4.10259		0.57779	5.19684		0.24798	8.25061
0.76307	4.10828		0.5708	5.1935		0.21808	8.10099
0.76227	4.10768		0.5708	5.16506		0.21808	8.0975
0.75921	4.10401		0.56425	5.12974		0.21808	8.09525
0.75856	4.09392		0.56425	5.14158		0.21808	8.09538
0.75531	4.0845		0.55726	5.13749		0.21802	8.09499
0.7548	4.06795		0.55727	5.12575		0.18851	7.93618
0.7514	4.04946		0.55038	5.12787		0.18851	7.93286
0.75107	4.05358		0.55038	5.12842		0.1882	7.93075
0.74751	4.07523		0.5438	5.12896		0.18813	7.92944
0.74733	4.08196		0.53874	5.13174		0.18806	7.92862
0.7436	4.0957		0.53726	5.12759		0.15853	7.71466
0.74356	4.10766		0.53173	5.12093		0.15834	7.71194
0.73981	4.09993		0.53049	5.1228		0.15815	7.70972
0.73981	4.1086		0.52475	5.12456		0.15796	7.70745
0.73603	4.10818		0.52379	5.11727		0.15936	7.70511
0.73603	4.08833		0.51773	5.10093		0.12851	7.43604
0.73224	4.07244		0.51689	5.09975		0.12815	7.43346
0.73224	4.06715		0.5107	5.11204		0.12815	7.42962
0.72861	4.07768		0.51001	5.1108		0.12815	7.42387
0.72861	4.08217		0.50377	5.09993		0.12815	7.42037
0.72485	4.0823		0.50349	5.09385		0.09831	7.06049
0.72485	4.08478		0.49677	5.10751		0.09831	7.05068
0.72121	4.07172		0.49677	5.10075		0.09831	7.04508
0.7182	4.09374		0.48998	5.09063		0.09831	7.04213
0.71746	4.09348		0.48998	5.10509		0.09799	7.04183
0.7143	4.08337		0.48329	5.10193		0.08849	6.86998
0.71389	4.10846		0.48329	5.09317		0.08837	6.86658
0.71043	4.10064		0.47676	5.09868		0.08825	6.86602
0.7102	4.07883		0.47676	5.10241		0.08825	6.86693
0.70654	4.08253		0.47018	5.10568		0.08825	6.8671
0.70651	4.10497		0.47018	5.10387		0.07865	6.6755
0.70279	4.10014		0.46327	5.09479		0.07817	6.66784
0.70279	4.10915		0.4581	5.08652		0.07806	6.66124
0.69898	4.11141		0.45662	5.08913		0.07795	6.65661
0.69898	4.10098		0.45112	5.08728		0.07783	6.65368
0.69524	4.08866		0.44994	5.0758		0.06825	6.42813
0.69524	4.06943		0.44411	5.06699		0.06825	6.42202
0.69143	4.08331		0.44319	5.05947		0.06825	6.41932
0.69143	4.08619		0.43706	5.06454		0.06817	6.41658
0.68766	4.06634		0.43627	5.08626		0.06815	6.41436
0.68766	4.06919		0.43005	5.10126		0.05835	6.14871
0.68386	4.07546		0.4296	5.09103		0.05814	6.14148
0.68104	4.08621		0.42305	5.08408		0.05812	6.1377
0.68021	4.08469		0.42297	5.07122		0.05812	6.13504
0.67711	4.07991		0.41612	5.04753		0.05812	6.13148
0.67649	4.08005		0.41612	5.0461		0.04836	5.8051
0.6732	4.0882		0.4095	5.04764		0.04822	5.7938
0.6728	4.07076		0.4095	5.03118		0.04807	5.78375
0.66932	4.0502		0.40286	5.03299		0.04793	5.77581
0.66898	4.04542		0.40286	5.04717		0.049	5.76983
0.66537	4.07285		0.39633	5.04165		0.03834	5.35822
0.66508	4.0914		0.39633	5.0272		0.03834	5.3448
0.66144	4.07657		0.3895	5.01409		0.03805	5.33424
0.66134	4.07611		0.38949	5.00269		0.03799	5.326
0.65762	4.06633		0.3828	4.99035		0.03792	5.31763
0.65762	4.06705		0.37741	4.98131		0.02813	4.81063
0.65383	4.06581		0.37603	4.99579		0.02812	4.79304
0.65383	4.06892		0.37038	5.01084		0.02812	4.77895
0.65003	4.07099		0.36942	5.01099		0.02812	4.76667
0.65003	4.06088		0.3634	4.99146		0.02812	4.75628
0.64636	4.08802		0.36287	4.96247		0.0186	4.01965
0.64636	4.10711		0.35644	4.95579		0.01839	3.99155
0.64264	4.09612		0.35626	4.95226		0.0182	3.96815
0.64264	4.08839		0.34954	4.95667		0.0182	3.9478
0.6388	4.09034		0.34954	4.97763		0.0182	3.93274
0.63589	4.0871		0.34283	4.98275		0.00881	2.75709
0.63505	4.06907		0.34283	4.97585		0.0087	2.70761
0.63197	4.06771		0.33625	4.96557		0.00859	2.6682
0.63131	4.07374		0.33625	4.96513		0.00847	2.6344
0.62802	4.07469		0.32969	4.96804		0.0093	2.60839
0.62753	4.0779		0.32969	4.95531		-0.000252428	0.32632
0.62415	4.05641		0.32298	4.93967		-0.000759971	0.22225
0.62387	4.04446		0.31783	4.93583		-0.000880988	0.13299
0.62023	4.04738		0.31632	4.92554		-0.001	0.05802
0.61997	4.05829		0.31083	4.91783		-0.00112	-0.00534
0.61632	4.08278		0.30964	4.91728		-0.01133	-2.58731
0.61632	4.08083		0.30383	4.9206		-0.01146	-2.63361
0.61254	4.07489		0.30301	4.91851		-0.01159	-2.66977
0.61254	4.06411		0.29678	4.90999		-0.01069	-2.70082
0.60889	4.05592		0.29632	4.90719		-0.01069	-2.72546
0.60889	4.07516		0.28973	4.89477		-0.02111	-3.90117
0.60521	4.05932		0.28972	4.87953		-0.02127	-3.9259
0.60521	4.04612		0.28294	4.88063		-0.02143	-3.94588
0.60132	4.05234		0.28294	4.88025		-0.02148	-3.96353
0.60132	4.04014		0.27595	4.87508		-0.02148	-3.97642
0.59751	4.05611		0.27595	4.86761		-0.03121	-4.72405
0.59751	4.04098		0.26923	4.86231		-0.03135	-4.7403
0.59374	4.03107		0.26923	4.85688		-0.03148	-4.75274
0.59073	4.0556		0.26268	4.8572		-0.03154	-4.76356
0.58993	4.06741		0.26268	4.85322		-0.03154	-4.77225
0.58681	4.04881		0.25614	4.84334		-0.03905	-5.4289
0.58623	4.04615		0.25118	4.83807		-0.03969	-5.33232
0.58289	4.05942		0.24961	4.82922		-0.04034	-5.29031
0.58238	4.06476		0.24417	4.8213		-0.04099	-5.28309
0.57892	4.05449		0.24296	4.80978		-0.03643	-5.29089
0.57843	4.0529		0.23711	4.80355		-0.05158	-5.75557
0.57495	4.0506		0.23613	4.79093		-0.05179	-5.76428
0.57456	4.03581		0.23007	4.77116		-0.05184	-5.77122
0.57104	4.03362		0.2295	4.76364		-0.05189	-5.77579
0.57083	4.03942		0.22305	4.76411		-0.05194	-5.7799
0.56712	4.03051		0.22274	4.75925		-0.06165	-6.10611
0.56712	4.03768		0.21602	4.75201		-0.06165	-6.1123
0.56331	4.05733		0.21602	4.74291		-0.06203	-6.11647
0.56331	4.06465		0.20932	4.73506		-0.06212	-6.11939
0.55954	4.05688		0.20933	4.72996		-0.0622	-6.12208
0.55954	4.05173		0.20251	4.71698		-0.0718	-6.38073
0.55573	4.04646		0.20251	4.7034		-0.0718	-6.38497
0.55573	4.0611		0.19581	4.70353		-0.0718	-6.38827
0.5521	4.07724		0.19581	4.70396		-0.07194	-6.39155
0.5521	4.06033		0.18894	4.68635		-0.07197	-6.39354
0.5484	4.05767		0.18894	4.66449		-0.08193	-6.60222
0.5454	4.08186		0.18226	4.64535		-0.08193	-6.60501
0.54461	4.07279		0.18226	4.63553		-0.08193	-6.60859
0.54147	4.07081		0.1756	4.63172		-0.08193	-6.61094
0.54086	4.06131		0.17025	4.62854		-0.08214	-6.61414
0.53755	4.05325		0.16882	4.6138		-0.09165	-6.79373
0.53708	4.05793		0.16323	4.59215		-0.09174	-6.7974
0.53364	4.07015		0.16195	4.57143		-0.09174	-6.79927
0.5333	4.05752		0.15625	4.55438		-0.09174	-6.80164
0.52975	4.06332		0.1553	4.54532		-0.09174	-6.80291
0.52956	4.05587		0.1492	4.53105		-0.10152	-6.95935
0.52582	4.04396		0.14852	4.5043		-0.10166	-6.96161
0.52582	4.05339		0.14219	4.48994		-0.1017	-6.96218
0.5221	4.04779		0.14175	4.48046		-0.1017	-6.96312
0.5221	4.04684		0.13518	4.46419		-0.1017	-6.96714
0.51845	4.0535		0.13517	4.43869		-0.10212	-6.97974
0.51845	4.05377		0.12855	4.41092		-0.10214	-6.97745
0.51478	4.06018		0.12855	4.37827		-0.10217	-6.97663
0.51478	4.04722		0.1217	4.35498		-0.10217	-6.97651
0.51109	4.03301		0.1217	4.34178		-0.10217	-6.97717
0.50811	4.03026		0.1146	4.31734		-0.12981	-7.33848
0.5074	4.03369		0.1146	4.29287		-0.13025	-7.34831
0.50418	4.03176		0.10768	4.26503		-0.13068	-7.35243
0.50357	4.0237		0.10768	4.22871		-0.13112	-7.35691
0.50026	4.01744		0.10076	4.19673		-0.12799	-7.36562
0.4997	4.00786		0.10076	4.1756		-0.16062	-7.65534
0.49631	4.00421		0.09395	4.14362		-0.16098	-7.65976
0.49582	4.00545		0.09395	4.09495		-0.16118	-7.6618
0.49239	3.99745		0.08728	4.04884		-0.16118	-7.66225
0.49212	4.00885		0.08219	4.00781		-0.16118	-7.66229
0.48853	4.01854		0.08069	3.95584		-0.1889	-7.84675
0.48853	3.99397		0.07515	3.90104		-0.18955	-7.85396
0.4849	3.99702		0.07404	3.85063		-0.1902	-7.86281
0.4849	4.00274		0.06811	3.79076		-0.19045	-7.8682
0.48116	4.02064		0.06728	3.72761		-0.19045	-7.87141
0.48116	4.01488		0.06111	3.66955		-0.22011	-8.04455
0.47756	3.99099		0.06067	3.60521		-0.22021	-8.0496
0.47468	4.01916		0.0541	3.53262		-0.22021	-8.05361
0.47382	4.0287		0.05399	3.44844		-0.22021	-8.05614
0.4707	4.00678		0.04703	3.35632		-0.22021	-8.05667
0.46993	4.00252		0.04702	3.26066		-0.24911	-8.18513
0.46679	4.00438		0.04	3.15381		-0.24911	-8.1811
0.46616	4.00005		0.04	3.04177		-0.24911	-8.17843
0.46283	3.99814		0.03361	2.91762		-0.24956	-8.17745
0.4623	4.00394		0.03361	2.78001		-0.24966	-8.17895
0.4589	4.00232		0.02689	2.63084		-0.27842	-8.29003
0.45856	3.9913		0.02689	2.46754		-0.27901	-8.29127
0.45496	3.99217		0.02036	2.27889		-0.27913	-8.28918
0.45482	3.99377		0.02036	2.0617		-0.27925	-8.28698
0.4511	3.98318		0.01391	1.81887		-0.27842	-8.28672
0.4511	4.00102		0.01391	1.54869		-0.30832	-8.36838
0.44734	3.99522		0.00742	1.24291		-0.30859	-8.37019
0.44734	3.97832		-0.00249	0.69892		-0.30875	-8.37232
0.44368	3.98093		-0.00484	-0.00445		-0.30875	-8.37335
0.44368	3.97821		-0.00831	-0.49307		-0.30875	-8.37464
0.44006	3.96133		-0.00887	-0.75705		-0.33835	-8.42312
0.44006	3.974		-0.01347	-0.99671		-0.33835	-8.42197
0.43632	3.98271		-0.01406	-1.24946		-0.33835	-8.42127
0.43337	3.99392		-0.01961	-1.5236		-0.33835	-8.42255
0.43255	3.98243		-0.02018	-1.80207		-0.33868	-8.42168
0.42944	3.98467		-0.02625	-2.04521		-0.36752	-8.46604
0.42881	3.97844		-0.02654	-2.24348		-0.36752	-8.47209
0.42552	3.96491		-0.03311	-2.42434		-0.36808	-8.4751
0.42503	3.97813		-0.03322	-2.58845		-0.3682	-8.47588
0.42158	3.97911		-0.03979	-2.73431		-0.36832	-8.4762
0.42129	3.96458		-0.03979	-2.8696		-0.39588	-8.53752
0.41761	3.96688		-0.04662	-3.00086		-0.39693	-8.53991
0.41752	3.9652		-0.04662	-3.1241		-0.39716	-8.5411
0.41375	3.96198		-0.05376	-3.23498		-0.39739	-8.54143
0.41375	3.97439		-0.05376	-3.34053		-0.39588	-8.54101
0.40996	3.97915		-0.06055	-3.43554		-0.42628	-8.57394
0.40996	3.97077		-0.06055	-3.52634		-0.42659	-8.57241
0.40614	3.96512		-0.06754	-3.61577		-0.42691	-8.56482
0.40615	3.96809		-0.06754	-3.68923		-0.42473	-8.56049
0.40247	3.97711		-0.07429	-3.75223		-0.42473	-8.56531
0.40247	3.97829		-0.07967	-3.81056		-0.45597	-8.63787
0.39868	3.98411		-0.08091	-3.86499		-0.45644	-8.63089
0.39868	3.99488		-0.08668	-3.91291		-0.45644	-8.63038
0.39486	3.9769		-0.08768	-3.957		-0.45644	-8.63019
0.39203	3.95248		-0.09371	-4.00209		-0.45644	-8.63356
0.39115	3.93301		-0.09443	-4.04033		-0.48565	-8.67461
0.38813	3.93888		-0.1008	-4.08477		-0.48565	-8.67822
0.38751	3.95733		-0.10126	-4.12765		-0.48565	-8.67948
0.38417	3.95901		-0.10776	-4.16298		-0.48628	-8.68042
0.38375	3.97608		-0.10781	-4.20474		-0.48643	-8.68271
0.38023	3.97351		-0.1146	-4.2388		-0.51493	-8.68925
0.38003	3.95755		-0.1146	-4.26136		-0.51547	-8.69424
0.37624	3.95194		-0.12121	-4.29348		-0.51559	-8.69855
0.37608	3.93542		-0.12121	-4.33048		-0.51571	-8.70201
0.37235	3.9434		-0.12801	-4.36191		-0.51493	-8.70445
0.37224	3.95371		-0.12801	-4.38899		-0.54497	-8.72162
0.36847	3.94813		-0.13457	-4.40669		-0.54518	-8.72079
0.36847	3.97314		-0.13457	-4.43322		-0.54539	-8.7189
0.36467	3.96407		-0.14122	-4.45596		-0.54539	-8.71466
0.36467	3.94593		-0.14122	-4.4724		-0.54539	-8.71073
0.36096	3.95267		-0.1479	-4.49728		-0.57509	-8.72353
0.36096	3.95211		-0.15322	-4.5237		-0.57509	-8.72925
0.35729	3.94734		-0.15442	-4.53822		-0.57509	-8.73504
0.35729	3.95188		-0.1602	-4.55233		-0.57509	-8.74072
0.35355	3.95921		-0.16093	-4.57027		-0.57554	-8.74168
0.35075	3.93707		-0.16714	-4.59267		-0.60441	-8.73419
0.34987	3.90985		-0.16755	-4.61952		-0.60441	-8.73152
0.34686	3.90782		-0.17399	-4.63852		-0.60498	-8.73267
0.34623	3.91218		-0.17399	-4.65489		-0.60511	-8.73354
0.3429	3.91524		-0.18051	-4.65802		-0.60524	-8.73007
0.34253	3.92149		-0.1805	-4.66008		-0.63503	-8.74792
0.339	3.92543		-0.18716	-4.67338		-0.63529	-8.74979
0.33889	3.92806		-0.18716	-4.68994		-0.63555	-8.753
0.33504	3.93463		-0.19371	-4.69905		-0.63388	-8.75545
0.335	3.92394		-0.19371	-4.7115		-0.63388	-8.75651
0.33124	3.90966		-0.20034	-4.71537		-0.66475	-8.77182
0.33124	3.89923		-0.20034	-4.71806		-0.66534	-8.77756
0.32751	3.90465		-0.20693	-4.72695		-0.6658	-8.78099
0.32751	3.91004		-0.2123	-4.73962		-0.6658	-8.78236
0.3236	3.89852		-0.21358	-4.75377		-0.6658	-8.78234
0.3236	3.89352		-0.21926	-4.75321		-0.6938	-8.8041
0.31992	3.88252		-0.22027	-4.75662		-0.69425	-8.80565
0.31992	3.87294		-0.22622	-4.76791		-0.69469	-8.80731
0.31619	3.87855		-0.22692	-4.78595		-0.69513	-8.80791
0.31618	3.87229		-0.23315	-4.79889		-0.69179	-8.80119
0.31235	3.88961		-0.23367	-4.80848		-0.72436	-8.83098
0.31235	3.90026		-0.24011	-4.81653		-0.7248	-8.833
0.30852	3.8911		-0.24032	-4.82238		-0.72523	-8.83414
0.30552	3.90153		-0.24694	-4.82886		-0.72204	-8.83339
0.30482	3.89348		-0.24694	-4.84144		-0.72204	-8.83113
0.30156	3.87717		-0.25381	-4.85384		-0.75501	-8.83745
0.30095	3.89091		-0.25381	-4.86443		-0.75546	-8.83642
0.29761	3.89982		-0.26048	-4.86548		-0.75546	-8.83321
0.29715	3.8785		-0.26048	-4.86321		-0.75546	-8.82675
0.29367	3.8714		-0.26711	-4.87136		-0.75546	-8.81935
0.29341	3.87271		-0.26711	-4.88154		-0.78477	-8.84178
0.28973	3.8758		-0.2738	-4.88729		-0.78477	-8.8414
0.28962	3.86396		-0.2738	-4.89296		-0.78477	-8.84152
0.28589	3.85999		-0.28035	-4.90025		-0.78477	-8.83984
0.28589	3.85801		-0.28035	-4.90021		-0.78524	-8.83712
0.28223	3.86454		-0.28674	-4.90545		-0.81466	-8.83483
0.28223	3.85579		-0.29207	-4.91654		-0.81466	-8.83337
0.27851	3.84696		-0.2932	-4.91988		-0.81528	-8.82958
0.27851	3.84398		-0.29903	-4.91927		-0.81542	-8.8263
0.27473	3.82522		-0.2999	-4.9219		-0.81557	-8.82565
0.27473	3.83237		-0.30596	-4.92525		-0.8447	-8.85161
0.27097	3.82		-0.30642	-4.9315		-0.84497	-8.84532
0.26801	3.82896		-0.31291	-4.93595		-0.84524	-8.84375
0.2671	3.84169		-0.3132	-4.94052		-0.84551	-8.84674
0.26413	3.82836		-0.31986	-4.94761		-0.84452	-8.85319
0.26345	3.83547		-0.32002	-4.95658		-0.87456	-8.85958
0.26021	3.83053		-0.32652	-4.95921		-0.87493	-8.85637
0.25975	3.82065		-0.32652	-4.96003		-0.87498	-8.85511
0.2563	3.79035		-0.33323	-4.96122		-0.87498	-8.85454
0.25607	3.77202		-0.33322	-4.96013		-0.87498	-8.85421
0.25238	3.78066		-0.33975	-4.95846		-0.90379	-8.85677
0.25238	3.79222		-0.33975	-4.96263		-0.90416	-8.85407
0.24865	3.79253		-0.34645	-4.96601		-0.90416	-8.85232
0.24865	3.77778		-0.34645	-4.97565		-0.90416	-8.85269
0.24485	3.77062		-0.35314	-4.98056		-0.90416	-8.85686
0.24485	3.76863		-0.35314	-4.98822		-0.93311	-8.86197
0.24105	3.75992		-0.35977	-4.99881		-0.93311	-8.86021
0.24105	3.76469		-0.36483	-4.99631		-0.93311	-8.85946
0.23728	3.76831		-0.36624	-4.99614		-0.93353	-8.85789
0.23728	3.75416		-0.37175	-4.9936		-0.93362	-8.85782
0.23348	3.76491		-0.37296	-5.00177		-0.96142	-8.87684
0.23348	3.76375		-0.37868	-5.00938		-0.96142	-8.88049
0.22967	3.7536		-0.37947	-5.00372		-0.96221	-8.88096
0.22967	3.75375		-0.3856	-5.00651		-0.96237	-8.87939
0.22581	3.75118		-0.3863	-5.0133		-0.96253	-8.87681
0.22279	3.73629		-0.39257	-5.01416		-0.99074	-8.88304
0.22218	3.7321		-0.39287	-5.01294		-0.99101	-8.88302
0.21884	3.73003		-0.3995	-5.03037		-0.99129	-8.88241
0.21845	3.72901		-0.3995	-5.04824		-0.98941	-8.87913
0.21491	3.7302		-0.40611	-5.05212		-0.98941	-8.87682
0.21466	3.72295		-0.40611	-5.0546		-0.96299	-8.85145
0.21095	3.71366		-0.41266	-5.0512		-0.96274	-8.8548
0.21083	3.70932		-0.41266	-5.03921		-0.96274	-8.8589
0.20707	3.7139		-0.4193	-5.03904		-0.96274	-8.86106
0.20707	3.70295		-0.4193	-5.04345		-0.96274	-8.86291
0.20331	3.70425		-0.4259	-5.05119		-0.93399	-8.88621
0.20331	3.71477		-0.4259	-5.06268		-0.93399	-8.88609
0.19952	3.69196		-0.43236	-5.06556		-0.93399	-8.88368
0.19952	3.67477		-0.43765	-5.0624		-0.93399	-8.88003
0.19571	3.6786		-0.43896	-5.06262		-0.93377	-8.87555
0.19571	3.67136		-0.4446	-5.07058		-0.90461	-8.86089
0.19194	3.66519		-0.44575	-5.07364		-0.90461	-8.86326
0.19194	3.6615		-0.4515	-5.07685		-0.90461	-8.86679
0.18821	3.66396		-0.4523	-5.08072		-0.90425	-8.86644
0.18522	3.66068		-0.45849	-5.08271		-0.90416	-8.86407
0.18444	3.65882		-0.45913	-5.09301		-0.87463	-8.81681
0.18126	3.65672		-0.46547	-5.09226		-0.87463	-8.8159
0.18072	3.64042		-0.46573	-5.09319		-0.87463	-8.81614
0.17735	3.62016		-0.47225	-5.08672		-0.87448	-8.81557
0.17704	3.61828		-0.47226	-5.07943		-0.87445	-8.81689
0.17342	3.62321		-0.47904	-5.09253		-0.84504	-8.83442
0.17325	3.60622		-0.47904	-5.09877		-0.84467	-8.83337
0.16948	3.60545		-0.48568	-5.10274		-0.8446	-8.83258
0.16948	3.60501		-0.48568	-5.09975		-0.84452	-8.83234
0.16564	3.59549		-0.49256	-5.09587		-0.84504	-8.83298
0.16564	3.60148		-0.49256	-5.09617		-0.81513	-8.84435
0.16191	3.58518		-0.49907	-5.10143		-0.81488	-8.84429
0.16191	3.56806		-0.49907	-5.10635		-0.81463	-8.84234
0.15819	3.57947		-0.50565	-5.10004		-0.81453	-8.83927
0.15819	3.58283		-0.51078	-5.09742		-0.81453	-8.83644
0.15438	3.56869		-0.51221	-5.1037		-0.78481	-8.82829
0.15438	3.54804		-0.51777	-5.109		-0.7844	-8.83258
0.15068	3.54919		-0.51897	-5.1132		-0.78416	-8.83805
0.15068	3.54383		-0.52477	-5.12282		-0.78416	-8.83918
0.14691	3.52583		-0.52563	-5.12893		-0.78416	-8.83853
0.14392	3.51455		-0.5317	-5.11998		-0.75461	-8.82258
0.14319	3.51038		-0.53235	-5.11099		-0.75461	-8.82768
0.13993	3.50402		-0.53873	-5.12355		-0.75461	-8.82752
0.13951	3.49821		-0.53936	-5.12501		-0.75461	-8.82291
0.13602	3.47675		-0.54569	-5.12626		-0.75407	-8.82136
0.13572	3.45959		-0.54624	-5.1312		-0.7243	-8.79839
0.13208	3.46748		-0.55266	-5.1288		-0.7243	-8.80017
0.13193	3.46909		-0.55291	-5.1228		-0.7243	-8.80531
0.12811	3.44665		-0.55964	-5.12787		-0.72387	-8.81037
0.128	3.425		-0.55964	-5.13148		-0.72378	-8.813
0.12432	3.41893		-0.56622	-5.1313		-0.6947	-8.7877
0.12432	3.41397		-0.56623	-5.12753		-0.6947	-8.78752
0.12062	3.40687		-0.57304	-5.1213		-0.69426	-8.78742
0.12062	3.39383		-0.57304	-5.11891		-0.69417	-8.78588
0.11683	3.37969		-0.57991	-5.12642		-0.69407	-8.78129
0.11683	3.36608		-0.57991	-5.13938		-0.66502	-8.76469
0.11302	3.34981		-0.58657	-5.14799		-0.66446	-8.76866
0.11302	3.34066		-0.58657	-5.15292		-0.66433	-8.77229
0.10922	3.33054		-0.59334	-5.14725		-0.66421	-8.77661
0.10922	3.31149		-0.59334	-5.14118		-0.66408	-8.77723
0.10543	3.28588		-0.60007	-5.14272		-0.63471	-8.7801
0.10239	3.27711		-0.60542	-5.15129		-0.63448	-8.78105
0.10168	3.26866		-0.60669	-5.16171		-0.63426	-8.77885
0.09885	3.25476		-0.6125	-5.17804		-0.63403	-8.77386
0.09837	3.25209		-0.61337	-5.18031		-0.63568	-8.76805
0.09809	3.25114		-0.61949	-5.16424		-0.60411	-8.77087
0.09806	3.2526		-0.61997	-5.15205		-0.60374	-8.77504
0.09773	3.25837		-0.62655	-5.15798		-0.60366	-8.77595
0.09771	3.25775		-0.62659	-5.16868		-0.60366	-8.77351
0.09702	3.25678		-0.63328	-5.17384		-0.60366	-8.76825
0.09702	3.2432		-0.63328	-5.17634		-0.5743	-8.747
0.09615	3.22862		-0.64006	-5.16893		-0.5743	-8.74277
0.09615	3.23816		-0.64006	-5.16753		-0.5743	-8.74141
0.09513	3.23928		-0.64669	-5.17827		-0.5743	-8.73981
0.09513	3.22065		-0.64669	-5.18027		-0.57406	-8.74065
0.09405	3.22037		-0.65352	-5.17939		-0.5446	-8.73906
0.09405	3.21198		-0.65352	-5.18483		-0.5446	-8.73361
0.09295	3.20364		-0.66035	-5.18482		-0.5446	-8.72686
0.09295	3.2105		-0.66035	-5.1885		-0.54399	-8.72288
0.09174	3.20522		-0.66704	-5.1979		-0.54387	-8.72454
0.09086	3.19957		-0.67235	-5.18809		-0.51552	-8.69262
0.09058	3.18977		-0.67365	-5.18119		-0.51476	-8.68976
0.0896	3.17738		-0.67943	-5.18674		-0.51458	-8.68663
0.08941	3.17717		-0.68036	-5.19176		-0.51441	-8.68211
0.08837	3.17457		-0.6865	-5.20568		-0.51552	-8.67709
0.08825	3.15821		-0.68722	-5.21455		-0.48503	-8.65757
0.08717	3.14371		-0.69359	-5.2115		-0.48476	-8.65483
0.08712	3.15329		-0.69385	-5.21297		-0.4845	-8.65379
0.08588	3.16576		-0.70053	-5.21326		-0.48446	-8.65534
0.08588	3.14783		-0.70053	-5.20596		-0.48446	-8.65778
0.08472	3.13005		-0.70711	-5.19179		-0.4554	-8.63267
0.08472	3.13289		-0.70711	-5.17964		-0.45496	-8.6323
0.0835	3.11283		-0.71396	-5.17893		-0.45496	-8.63145
0.0835	3.09163		-0.71396	-5.18445		-0.45496	-8.63099
0.08231	3.10496		-0.72074	-5.19861		-0.45496	-8.62934
0.08231	3.10366		-0.72073	-5.20877		-0.42553	-8.61284
0.08105	3.09275		-0.72751	-5.19738		-0.42553	-8.60839
0.08105	3.09141		-0.7275	-5.18576		-0.42553	-8.60379
0.07987	3.0813		-0.73409	-5.20185		-0.42553	-8.59998
0.07987	3.06248		-0.73409	-5.22032		-0.42517	-8.59745
0.0787	3.02462		-0.74112	-5.21176		-0.39605	-8.56328
0.07777	3.02894		-0.74649	-5.20541		-0.39605	-8.56243
0.07751	3.0411		-0.74789	-5.21663		-0.39605	-8.56335
0.07657	3.04348		-0.75351	-5.23087		-0.39605	-8.56646
0.07637	3.04042		-0.75477	-5.22786		-0.39553	-8.57084
0.07526	3.01946		-0.76061	-5.23143		-0.36635	-8.51239
0.07511	3.01392		-0.76156	-5.23381		-0.36588	-8.50473
0.07404	3.01432		-0.76769	-5.21901		-0.36577	-8.49937
0.07396	3.00869		-0.76842	-5.21923		-0.36566	-8.50002
0.07281	2.99645		-0.77478	-5.22917		-0.36555	-8.50176
0.07279	2.98844		-0.77524	-5.21961		-0.33683	-8.41119
0.07154	2.98		-0.78183	-5.22279		-0.33659	-8.4125
0.07154	2.95847		-0.78198	-5.22888		-0.33635	-8.41468
0.07046	2.94386		-0.78869	-5.2417		-0.33612	-8.41787
0.07046	2.94744		-0.78869	-5.24899		-0.33698	-8.41564
0.06924	2.93854		-0.7953	-5.24442		-0.30715	-8.3444
0.06924	2.92668		-0.79529	-5.23099		-0.30684	-8.34405
0.068	2.91885		-0.80191	-5.22692		-0.30653	-8.34223
0.068	2.9077		-0.80191	-5.22904		-0.30648	-8.34049
0.0668	2.90617		-0.80851	-5.23022		-0.30648	-8.34148
0.0668	2.89751		-0.80851	-5.24059		-0.27685	-8.27496
0.0656	2.8743		-0.81517	-5.23899		-0.27673	-8.27457
0.06468	2.87213		-0.82054	-5.22323		-0.27673	-8.27159
0.06439	2.87306		-0.822	-5.22181		-0.27673	-8.26906
0.0634	2.8548		-0.82757	-5.22289		-0.27673	-8.26361
0.06317	2.83371		-0.82871	-5.22369		-0.2476	-8.17368
0.06217	2.83542		-0.83462	-5.22203		-0.2476	-8.17483
0.06199	2.83923		-0.83553	-5.22961		-0.2476	-8.17586
0.06094	2.83352		-0.84163	-5.23816		-0.24709	-8.17696
0.06082	2.82351		-0.84221	-5.2413		-0.24697	-8.17627
0.05964	2.79192		-0.84867	-5.23528		-0.2181	-8.04901
0.05957	2.78595		-0.84883	-5.23266		-0.2181	-8.04887
0.05838	2.78344		-0.85538	-5.23694		-0.21758	-8.04777
0.05836	2.76722		-0.85537	-5.24035		-0.21747	-8.04279
0.05718	2.76312		-0.862	-5.24095		-0.21735	-8.04005
0.05718	2.75751		-0.862	-5.23725		-0.18902	-7.8766
0.05602	2.74045		-0.86851	-5.23799		-0.18816	-7.87604
0.05602	2.72019		-0.86851	-5.25521		-0.18797	-7.87492
0.05481	2.71169		-0.8753	-5.26162		-0.18777	-7.87358
0.05481	2.69873		-0.8753	-5.25502		-0.18902	-7.87229
0.05359	2.68622		-0.88185	-5.24615		-0.15852	-7.64613
0.05359	2.67369		-0.88706	-5.24818		-0.1582	-7.64099
0.05242	2.66209		-0.88841	-5.25579		-0.15787	-7.63611
0.05242	2.64485		-0.89402	-5.24721		-0.15773	-7.63318
0.05123	2.62659		-0.89511	-5.24096		-0.15773	-7.63262
0.05029	2.62103		-0.90091	-5.24202		-0.12846	-7.35068
0.05003	2.61411		-0.9017	-5.24086		-0.1283	-7.34318
0.04904	2.60526		-0.90782	-5.24644		-0.1283	-7.33693
0.04882	2.58489		-0.90834	-5.25841		-0.1283	-7.3352
0.04778	2.56362		-0.9146	-5.25237		-0.1283	-7.33454
0.04763	2.54817		-0.9146	-5.24369		-0.09853	-6.94778
0.04656	2.53134		-0.92123	-5.25698		-0.09853	-6.93941
0.0465	2.51657		-0.92123	-5.25779		-0.09853	-6.93529
0.04534	2.5147		-0.92778	-5.24617		-0.09805	-6.93295
0.04534	2.49869		-0.92778	-5.24102		-0.09794	-6.93237
0.04406	2.47584		-0.93435	-5.24287		-0.08826	-6.75972
0.04406	2.45676		-0.93435	-5.25317		-0.08826	-6.7536
0.0427	2.44611		-0.94107	-5.25184		-0.08826	-6.7507
0.0427	2.42512		-0.94107	-5.25694		-0.08826	-6.7482
0.04145	2.39073		-0.9477	-5.26867		-0.08803	-6.7455
0.04145	2.37282		-0.9477	-5.27099		-0.07849	-6.55028
0.04012	2.3685		-0.95418	-5.26877		-0.07831	-6.54525
0.04012	2.35102		-0.95922	-5.27556		-0.0782	-6.54075
0.03891	2.32598		-0.96053	-5.28048		-0.0782	-6.53672
0.03891	2.31211		-0.96598	-5.26364		-0.0782	-6.53391
0.03769	2.30237		-0.96717	-5.25479		-0.06882	-6.32312
0.03769	2.2793		-0.97272	-5.24694		-0.06844	-6.31777
0.03653	2.25847		-0.97372	-5.25474		-0.06836	-6.31297
0.0356	2.2437		-0.97947	-5.27103		-0.06828	-6.30874
0.03533	2.22226		-0.98018	-5.27373		-0.06882	-6.30347
0.03437	2.19916		-0.98612	-5.27819		-0.05855	-6.03442
0.03417	2.18465		-0.98671	-5.28362		-0.05855	-6.02738
0.03313	2.16886		-0.99274	-5.28036		-0.05855	-6.02021
0.03299	2.15447		-0.99325	-5.2716		-0.05833	-6.01358
0.03188	2.1389		-1.00074	-5.27513		-0.05828	-6.00925
0.03182	2.11313		-1.00113	-5.28311		-0.04812	-5.66431
0.03067	2.08442		-1.00277	-5.29189		-0.04812	-5.65637
0.03066	2.05951		-1.00277	-5.28968		-0.04812	-5.65099
0.02947	2.04816		-1.00223	-5.2814		-0.04812	-5.64595
0.02947	2.0235		-1.00223	-5.28266		-0.04814	-5.64183
0.02829	1.99241		-0.9981	-5.27563		-0.0382	-5.22047
0.02829	1.97329		-0.9981	-5.26876		-0.03793	-5.2067
0.02708	1.94566		-0.99212	-5.26926		-0.03793	-5.19545
0.02708	1.91519		-0.99212	-5.27056		-0.03793	-5.18665
0.02596	1.89118		-0.98554	-5.25992		-0.03793	-5.17942
0.02596	1.86295		-0.98555	-5.249		-0.02854	-4.61405
0.02478	1.84237		-0.97895	-5.25621		-0.02841	-4.59825
0.02386	1.8068		-0.97894	-5.26381		-0.02829	-4.58438
0.02358	1.77114		-0.9724	-5.25469		-0.02829	-4.57382
0.02266	1.74434		-0.9724	-5.24742		-0.02829	-4.56482
0.02247	1.71901		-0.9659	-5.25067		-0.01859	-3.73496
0.02141	1.68575		-0.9659	-5.25143		-0.01846	-3.70794
0.02124	1.65016		-0.95916	-5.2575		-0.01833	-3.68787
0.02019	1.6197		-0.9539	-5.27651		-0.01917	-3.67225
0.02006	1.59705		-0.95246	-5.26937		-0.01917	-3.6599
0.0189	1.57037		-0.94705	-5.25249		-0.00946	-2.37443
0.01881	1.5395		-0.94615	-5.24482		-0.00877	-2.31979
0.01771	1.50377		-0.94016	-5.25611		-0.00861	-2.2734
0.01768	1.45034		-0.93964	-5.2619		-0.00845	-2.23588
0.01651	1.40058		-0.93326	-5.26178		-0.00829	-2.20705
0.01651	1.36057		-0.93311	-5.26818		0.000379683	0.43535
0.01525	1.32228		-0.92646	-5.27323		0.000379683	0.53606
0.01525	1.27739		-0.92646	-5.28336		0.000940021	0.61583
0.01407	1.22228		-0.91975	-5.27626		0.00107	0.68124
0.01407	1.17954		-0.91975	-5.25749		0.00121	0.73089
0.01285	1.15057		-0.91328	-5.25365		0.01111	2.94569
0.01285	1.11561		-0.91328	-5.25731		0.01126	2.98639
0.01168	1.08678		-0.90645	-5.24307		0.0114	3.0175
0.01168	1.05753		-0.90646	-5.22996		0.01155	3.04297
0.0105	1.00156		-0.89991	-5.23968		0.01051	3.06298
0.0105	0.93055		-0.89991	-5.24684		0.02112	4.12698
0.00931	0.87345		-0.89337	-5.252		0.02121	4.14874
0.00931	0.8382		-0.88818	-5.25554		0.0213	4.16766
0.0081	0.8188		-0.88679	-5.25458		0.0214	4.18337
0.00719	0.78902		-0.88119	-5.25468		0.02073	4.19421
0.00694	0.74714		-0.8803	-5.24845		0.03072	4.89173
0.00598	0.69828		-0.87421	-5.24351		0.03127	4.90709
0.0058	0.6506		-0.87365	-5.24456		0.03138	4.91887
0.00476	0.60036		-0.8672	-5.23935		0.0315	4.92876
0.00467	0.54976		-0.86696	-5.2343		0.03072	4.9388
0.00355	0.49177		-0.86033	-5.22468		0.04064	5.43538
0.00352	0.43426		-0.86033	-5.21325		0.04064	5.4464
0.00234	0.38007		-0.85359	-5.21774		0.04108	5.45656
0.00233	0.32049		-0.85359	-5.21431		0.04117	5.46461
0.00117	0.2652		-0.84688	-5.20662		0.04127	5.47112
0.00117	0.20693		-0.84688	-5.21347		0.05134	5.8638
2.83257e-05	0.14875		-0.84014	-5.22603		0.05134	5.87365
2.84702e-05	-0.06482		-0.84014	-5.22519		0.05134	5.88222
-0.00465	-0.26762		-0.83344	-5.22129		0.05168	5.88901
-0.00465	-0.33581		-0.83344	-5.22932		0.05175	5.89426
-0.00495	-0.35722		-0.82668	-5.22262		0.0619	6.20993
-0.00495	-0.37605		-0.82668	-5.20064		0.0619	6.21581
-0.00505	-0.3951		-0.81974	-5.19279		0.0619	6.21946
-0.00505	-0.41252		-0.81443	-5.20711		0.0619	6.22449
-0.00556	-0.42737		-0.81298	-5.22216		0.06193	6.22658
-0.00556	-0.44307		-0.80744	-5.22257		0.07148	6.47241
-0.00628	-0.46657		-0.80637	-5.22717		0.07158	6.47593
-0.007	-0.50453		-0.80041	-5.22102		0.07158	6.4801
-0.00716	-0.5444		-0.79964	-5.21011		0.07158	6.48473
-0.00797	-0.58891		-0.79339	-5.21702		0.07158	6.48853
-0.00809	-0.63883		-0.79287	-5.22706		0.08144	6.69914
-0.00911	-0.68988		-0.78637	-5.22317		0.0816	6.70354
-0.00923	-0.74023		-0.78612	-5.2083		0.08167	6.70511
-0.01026	-0.78744		-0.77926	-5.2037		0.08167	6.70813
-0.01035	-0.83565		-0.77909	-5.21005		0.08167	6.71115
-0.01145	-0.87798		-0.77217	-5.21554		0.09158	6.893
-0.0115	-0.91623		-0.77202	-5.22738		0.09173	6.89815
-0.01266	-0.96057		-0.76534	-5.23323		0.09189	6.90092
-0.01267	-1.00297		-0.76533	-5.22792		0.09192	6.90394
-0.01382	-1.04478		-0.7584	-5.20888		0.09192	6.90677
-0.01382	-1.08174		-0.7584	-5.19414		0.10167	7.05995
-0.01501	-1.11978		-0.75138	-5.18866		0.10177	7.06558
-0.01501	-1.1583		-0.75138	-5.19604		0.10188	7.06887
-0.01624	-1.19104		-0.74478	-5.19922		0.10198	7.06976
-0.01624	-1.22672		-0.74478	-5.19151		0.10126	7.07044
-0.01741	-1.25578		-0.73812	-5.18496		0.10186	7.06913
-0.01741	-1.28986		-0.73812	-5.192		0.10186	7.0711
-0.01854	-1.33587		-0.73142	-5.19103		0.10189	7.07215
-0.01854	-1.37618		-0.72622	-5.18816		0.1019	7.07405
-0.01973	-1.415		-0.72497	-5.17913		0.1019	7.07417
-0.01973	-1.44762		-0.71911	-5.17872		0.13067	7.44037
-0.02095	-1.47102		-0.71822	-5.1847		0.13092	7.44644
-0.02189	-1.50668		-0.71207	-5.18192		0.13117	7.45005
-0.02216	-1.53859		-0.71158	-5.18658		0.12942	7.45246
-0.02309	-1.56238		-0.7051	-5.18369		0.12942	7.45393
-0.02328	-1.59528		-0.7051	-5.166		0.16043	7.71545
-0.02436	-1.6242		-0.69844	-5.1611		0.16061	7.71539
-0.02448	-1.65331		-0.69845	-5.16267		0.16061	7.71784
-0.02561	-1.68446		-0.69161	-5.16807		0.16061	7.71815
-0.02566	-1.71534		-0.69161	-5.16741		0.16061	7.7193
-0.0268	-1.74824		-0.685	-5.16058		0.18994	7.93277
-0.0268	-1.78245		-0.685	-5.16528		0.18994	7.93457
-0.02805	-1.81201		-0.67831	-5.16231		0.18994	7.93562
-0.02805	-1.8229		-0.67327	-5.14988		0.19058	7.93705
-0.02924	-1.84289		-0.67167	-5.14888		0.19071	7.94012
-0.02924	-1.87787		-0.66615	-5.15091		0.21931	8.10223
-0.03043	-1.90073		-0.66493	-5.15698		0.22001	8.10281
-0.03043	-1.92405		-0.6591	-5.15526		0.22015	8.1037
-0.03166	-1.95687		-0.65827	-5.15031		0.22029	8.10398
-0.03166	-1.97988		-0.65209	-5.15392		0.21931	8.10606
-0.03283	-1.99588		-0.65172	-5.14957		0.24958	8.23281
-0.03283	-2.02023		-0.64497	-5.14001		0.24994	8.23171
-0.03398	-2.0406		-0.64497	-5.13564		0.25013	8.23318
-0.03487	-2.05679		-0.63832	-5.13489		0.25013	8.237
-0.03511	-2.07787		-0.63832	-5.13977		0.25013	8.23972
-0.03611	-2.11333		-0.63154	-5.13855		0.27971	8.33866
-0.03629	-2.14057		-0.63153	-5.13992		0.27974	8.33941
-0.0373	-2.16393		-0.6246	-5.14459		0.27974	8.34082
-0.03745	-2.1958		-0.6246	-5.13782		0.27974	8.33923
-0.03859	-2.21205		-0.61797	-5.13625		0.28013	8.34316
-0.03869	-2.21898		-0.61797	-5.13567		0.30835	8.46792
-0.03979	-2.23679		-0.61133	-5.12832		0.30835	8.45176
-0.03987	-2.26287		-0.61133	-5.12605		0.30835	8.44377
-0.04103	-2.27951		-0.60452	-5.11941		0.30915	8.44033
-0.04106	-2.29822		-0.59925	-5.10759		0.30932	8.44007
-0.04228	-2.31534		-0.59793	-5.10635		0.33807	8.50124
-0.04229	-2.32965		-0.5922	-5.11915		0.33885	8.50342
-0.04353	-2.3529		-0.5914	-5.13211		0.33901	8.50297
-0.04353	-2.3689		-0.58513	-5.1187		0.33917	8.50265
-0.0447	-2.39123		-0.5847	-5.1071		0.33807	8.5023
-0.0447	-2.4063		-0.57814	-5.12332		0.36829	8.56393
-0.04595	-2.42146		-0.5779	-5.13678		0.36865	8.56551
-0.04595	-2.4487		-0.5711	-5.1268		0.3688	8.56634
-0.04723	-2.46008		-0.5711	-5.12208		0.3688	8.56625
-0.04723	-2.46839		-0.56443	-5.12073		0.3688	8.56681
-0.04851	-2.501		-0.56443	-5.111		0.39822	8.61026
-0.04851	-2.52696		-0.55774	-5.1093		0.39822	8.61237
-0.0498	-2.5342		-0.55774	-5.11255		0.39822	8.61216
-0.05077	-2.5379		-0.55102	-5.11114		0.39822	8.61066
-0.05101	-2.54931		-0.55102	-5.10675		0.39868	8.60832
-0.0521	-2.56306		-0.54446	-5.09909		0.42759	8.64866
-0.0523	-2.59279		-0.54446	-5.09228		0.42759	8.64759
-0.05333	-2.60407		-0.5378	-5.09107		0.42815	8.64887
-0.05346	-2.61011		-0.53251	-5.08774		0.42828	8.65042
-0.05458	-2.62991		-0.5313	-5.08425		0.4284	8.65056
-0.05465	-2.64343		-0.52549	-5.08251		0.45767	8.70771
-0.05587	-2.65449		-0.52457	-5.0889		0.45791	8.70984
-0.05589	-2.67153		-0.51851	-5.09435		0.45815	8.71056
-0.057	-2.68152		-0.51767	-5.08556		0.45657	8.71038
-0.057	-2.69271		-0.51154	-5.08655		0.45657	8.71227
-0.05821	-2.71098		-0.51097	-5.08123		0.48769	8.74035
-0.05821	-2.72241		-0.50452	-5.06986		0.48804	8.74326
-0.05936	-2.73925		-0.5044	-5.06591		0.48804	8.74358
-0.05936	-2.7503		-0.49787	-5.06611		0.48804	8.74389
-0.06058	-2.75051		-0.49787	-5.06034		0.48804	8.74166
-0.06058	-2.76145		-0.4913	-5.06488		0.5174	8.75054
-0.06181	-2.77749		-0.4913	-5.07884		0.5174	8.74592
-0.06181	-2.78935		-0.48458	-5.06513		0.5174	8.74155
-0.063	-2.79285		-0.48458	-5.04638		0.5174	8.74166
-0.06396	-2.80473		-0.47805	-5.04473		0.51757	8.74682
-0.06418	-2.81112		-0.47805	-5.04777		0.54557	8.75546
-0.06521	-2.81573		-0.47131	-5.04591		0.54557	8.76455
-0.06541	-2.82402		-0.47131	-5.04347		0.54632	8.76773
-0.06648	-2.83672		-0.46441	-5.05889		0.5465	8.76689
-0.06663	-2.85247		-0.45903	-5.06072		0.54668	8.76632
-0.06771	-2.85879		-0.45757	-5.04686		0.57556	8.80293
-0.06783	-2.87623		-0.45209	-5.04042		0.57628	8.80023
-0.06894	-2.89211		-0.45103	-5.03712		0.57643	8.79201
-0.06899	-2.90451		-0.44506	-5.03555		0.57658	8.78492
-0.07018	-2.9161		-0.44425	-5.02954		0.57556	8.78058
-0.07019	-2.9165		-0.43812	-5.03033		0.60621	8.81766
-0.07142	-2.92477		-0.43743	-5.03385		0.6066	8.81976
-0.07142	-2.93178		-0.43117	-5.04214		0.60676	8.8207
-0.07263	-2.9428		-0.43073	-5.03278		0.60676	8.82127
-0.07263	-2.96184		-0.42418	-5.01089		0.60676	8.82101
-0.07383	-2.96545		-0.42418	-5.0112		0.63614	8.83764
-0.07383	-2.97255		-0.41752	-5.01933		0.63614	8.83606
-0.07503	-2.98344		-0.41752	-5.00612		0.63614	8.83143
-0.07503	-2.98121		-0.41086	-4.99616		0.63614	8.82461
-0.07621	-2.9871		-0.41086	-4.99872		0.63678	8.81538
-0.07621	-3.00267		-0.40419	-4.99989		0.6658	8.8112
-0.07737	-3.01509		-0.40419	-4.99986		0.6658	8.8199
-0.07737	-3.02413		-0.3974	-5.00183		0.66688	8.82647
-0.07854	-3.02157		-0.39741	-5.0025		0.6671	8.83225
-0.0795	-3.02415		-0.39059	-4.99218		0.66732	8.83911
-0.07978	-3.04257		-0.39059	-4.98831		0.69602	8.84703
-0.08075	-3.05386		-0.38394	-4.98737		0.69622	8.84412
-0.08095	-3.06523		-0.37885	-4.98433		0.69642	8.84325
-0.08199	-3.06604		-0.37738	-4.98156		0.6965	8.84396
-0.08214	-3.07612		-0.37189	-4.98145		0.6965	8.84422
-0.08324	-3.08081		-0.37074	-4.97993		0.72556	8.85857
-0.08334	-3.08943		-0.36494	-4.98062		0.7258	8.86241
-0.0845	-3.10684		-0.3642	-4.98435		0.7258	8.86682
-0.08454	-3.10587		-0.358	-4.97582		0.7258	8.86752
-0.08568	-3.11816		-0.35759	-4.96704		0.7258	8.8656
-0.08568	-3.12509		-0.35105	-4.96693		0.75512	8.87002
-0.08686	-3.12852		-0.3509	-4.95443		0.75512	8.86616
-0.08686	-3.12855		-0.34419	-4.94418		0.75512	8.86361
-0.08808	-3.14096		-0.34419	-4.94068		0.75559	8.86291
-0.08808	-3.14463		-0.33742	-4.94308		0.75569	8.86541
-0.08928	-3.1373		-0.33742	-4.94933		0.78386	8.88593
-0.08928	-3.13915		-0.33078	-4.94328		0.78471	8.88595
-0.09046	-3.14607		-0.33079	-4.92944		0.78489	8.88518
-0.09046	-3.1558		-0.32405	-4.92263		0.78508	8.88476
-0.09159	-3.16737		-0.32405	-4.92316		0.78386	8.88771
-0.09255	-3.16259		-0.31751	-4.91972		0.8137	8.87853
-0.09276	-3.16111		-0.31751	-4.9181		0.81403	8.87801
-0.09377	-3.19509		-0.31078	-4.9147		0.81434	8.87808
-0.09394	-3.2052		-0.30577	-4.91846		0.81434	8.87696
-0.09497	-3.20705		-0.30419	-4.91261		0.81434	8.87532
-0.09507	-3.2114		-0.29886	-4.89359		0.84322	8.88798
-0.09629	-3.22477		-0.29752	-4.88301		0.84322	8.8944
-0.09634	-3.24095		-0.29189	-4.87593		0.84322	8.89586
-0.09751	-3.23264		-0.29081	-4.8742		0.84322	8.89539
-0.09751	-3.23171		-0.28488	-4.87649		0.84322	8.89431
-0.09864	-3.23224		-0.284	-4.88208		0.87114	8.91794
-0.09864	-3.24092		-0.27789	-4.88119		0.87189	8.91792
-0.09981	-3.24107		-0.27735	-4.8764		0.87189	8.91499
-0.09981	-3.23896		-0.2709	-4.85705		0.87189	8.91454
-0.10227	-3.25991		-0.27052	-4.84575		0.87189	8.91328
-0.10227	-3.27661		-0.26399	-4.84681		0.90049	8.92365
-0.10404	-3.27459		-0.26376	-4.83809		0.90049	8.92499
-0.10427	-3.281		-0.25732	-4.8373		0.90049	8.92284
-0.10434	-3.28112		-0.25732	-4.83172		0.90106	8.91675
-0.10577	-3.28942		-0.25062	-4.82417		0.9012	8.91051
-0.1061	-3.30856		-0.25062	-4.80947		0.92886	8.89333
-0.10883	-3.32431		-0.24396	-4.79695		0.92933	8.89288
-0.10921	-3.31434		-0.24396	-4.7923		0.92944	8.8949
-0.11258	-3.33168		-0.23747	-4.79842		0.92956	8.89613
-0.11283	-3.3861		-0.23747	-4.79718		0.92966	8.90075
-0.11643	-3.39767		-0.23065	-4.79185		0.95726	8.89675
-0.11655	-3.39236		-0.23065	-4.77772		0.95751	8.90342
-0.12029	-3.40962		-0.22376	-4.75738		0.95776	8.90867
-0.12029	-3.42402		-0.22376	-4.7465		0.95778	8.90995
-0.12399	-3.41911		-0.21681	-4.72836		0.95778	8.90859
-0.12399	-3.4192		-0.21681	-4.71433		0.99069	8.89625
-0.12775	-3.43518		-0.20988	-4.71489		0.99069	8.89384
-0.12775	-3.45126		-0.2046	-4.70787		0.99069	8.89438
-0.13165	-3.45894		-0.2032	-4.6965		0.99069	8.8974
-0.13165	-3.47419		-0.19762	-4.69372		0.99069	8.89688
-0.13543	-3.48581		-0.19679	-4.69348		1.09304	8.89115
-0.13543	-3.5028		-0.19057	-4.67095
-0.13917	-3.51458		-0.19	-4.65078
-0.13917	-3.51625		-0.18362	-4.64162
-0.14301	-3.51696		-0.18336	-4.63358
-0.14585	-3.51722		-0.17665	-4.62027
-0.14668	-3.53031		-0.17659	-4.60701
-0.14975	-3.55881		-0.16972	-4.60154
-0.1504	-3.57485		-0.16972	-4.58232
-0.15361	-3.57111		-0.16298	-4.57213
-0.15402	-3.57435		-0.16298	-4.55953
-0.1575	-3.57737		-0.15634	-4.54533
-0.15773	-3.58993		-0.15634	-4.52852
-0.16138	-3.59466		-0.14944	-4.49793
-0.16152	-3.60756		-0.14944	-4.47511
-0.16523	-3.61829		-0.14292	-4.46336
-0.16523	-3.6274		-0.14292	-4.44556
-0.16896	-3.62068		-0.13633	-4.42277
-0.16896	-3.621		-0.13633	-4.40442
-0.17267	-3.6272		-0.12931	-4.37918
-0.17267	-3.63508		-0.12413	-4.34615
-0.17637	-3.6358		-0.12265	-4.32007
-0.17637	-3.6328		-0.11713	-4.29524
-0.18001	-3.64711		-0.11589	-4.26039
-0.18001	-3.65721		-0.11008	-4.23745
-0.18366	-3.65752		-0.10896	-4.21464
-0.18664	-3.66291		-0.10302	-4.1859
-0.18732	-3.67358		-0.1022	-4.14861
-0.19055	-3.68543		-0.09596	-4.10751
-0.1912	-3.69224		-0.09552	-4.06721
-0.19447	-3.69816		-0.08909	-4.02383
-0.1949	-3.70367		-0.08909	-3.98653
-0.19837	-3.70734		-0.08232	-3.95118
-0.19865	-3.70631		-0.08232	-3.89407
-0.20227	-3.72298		-0.07556	-3.83962
-0.20234	-3.7369		-0.07556	-3.79854
-0.20623	-3.74024		-0.06887	-3.74987
-0.20624	-3.73789		-0.06887	-3.68905
-0.20992	-3.74775		-0.06212	-3.61525
-0.20992	-3.75407		-0.06212	-3.5351
-0.21367	-3.74519		-0.05523	-3.44983
-0.21367	-3.73965		-0.05523	-3.35846
-0.21743	-3.7319		-0.04834	-3.26241
-0.21743	-3.73919		-0.04834	-3.15513
-0.22127	-3.75249		-0.04146	-3.04135
-0.22127	-3.74836		-0.03635	-2.92278
-0.22511	-3.75051		-0.03512	-2.79256
-0.22511	-3.76813		-0.02957	-2.64483
-0.22892	-3.77073		-0.02873	-2.47807
-0.22892	-3.75829		-0.0227	-2.2933
-0.23272	-3.76485		-0.02232	-2.09247
-0.23271	-3.77014		-0.01581	-1.86575
-0.2364	-3.78252		-0.01581	-1.60948
-0.23934	-3.78262		-0.00945	-1.31538
-0.24007	-3.77546		-0.00945	-0.86712
-0.24329	-3.78081		0.00303	-0.13987
-0.24377	-3.77856		0.00303	0.45942
-0.24712	-3.78786		0.00701	0.84582
-0.24724	-3.79545		0.00701	1.13208
-0.25099	-3.78879		0.01239	1.38582
-0.25099	-3.80787		0.01239	1.62799
-0.25464	-3.81939		0.01872	1.85721
-0.25464	-3.82095		0.01872	2.07351
-0.25839	-3.81618		0.02507	2.27593
-0.25839	-3.81669		0.02507	2.45727
-0.2622	-3.82134		0.03153	2.62302
-0.2622	-3.82394		0.03153	2.77479
-0.26593	-3.83293		0.03837	2.91958
-0.26593	-3.8468		0.04401	3.0622
-0.26971	-3.8482		0.04541	3.1911
-0.26971	-3.84572		0.05135	3.29908
-0.27344	-3.84051		0.05256	3.39726
-0.27625	-3.84287		0.05858	3.48995
-0.27698	-3.84783		0.05965	3.57555
-0.28015	-3.84832		0.06575	3.6538
-0.2807	-3.84766		0.06647	3.72936
-0.28402	-3.84604		0.07287	3.79913
-0.28446	-3.84309		0.07333	3.86159
-0.28796	-3.85596		0.07997	3.92516
-0.2882	-3.86247		0.08033	3.98642
-0.29186	-3.86791		0.08687	4.03589
-0.29194	-3.86523		0.08687	4.07296
-0.29575	-3.85585		0.09364	4.1131
-0.29576	-3.87259		0.09364	4.15603
-0.29947	-3.89676		0.10033	4.19667
-0.29947	-3.89347		0.10033	4.23496
-0.30308	-3.86825		0.10703	4.26982
-0.30308	-3.86309		0.10703	4.3026
-0.30673	-3.88176		0.11367	4.33469
-0.30673	-3.87944		0.11367	4.36744
-0.31051	-3.87117		0.12033	4.39353
-0.31051	-3.87243		0.12571	4.41583
-0.31417	-3.87187		0.12701	4.43965
-0.3171	-3.88173		0.13276	4.46508
-0.3178	-3.88852		0.13374	4.48607
-0.32097	-3.89183		0.13979	4.50611
-0.32162	-3.87892		0.14073	4.52938
-0.32492	-3.86501		0.14681	4.5469
-0.32538	-3.86396		0.1474	4.5549
-0.32879	-3.86072		0.15375	4.57325
-0.32913	-3.87351		0.15396	4.59301
-0.33269	-3.88463		0.16054	4.6063
-0.33281	-3.90331		0.16054	4.62238
-0.33649	-3.89542		0.16745	4.6353
-0.33649	-3.90099		0.16745	4.65868
-0.34014	-3.90752		0.17422	4.68246
-0.34014	-3.90486		0.17423	4.68877
-0.34381	-3.9205		0.18093	4.69907
-0.34382	-3.91817		0.18093	4.71291
-0.34748	-3.93072		0.18764	4.71925
-0.35017	-3.93608		0.18764	4.71909
-0.35103	-3.92733		0.1944	4.72851
-0.35405	-3.93869		0.19439	4.74763
-0.35484	-3.95457		0.20114	4.76217
-0.35794	-3.95253		0.20617	4.77128
-0.35866	-3.95611		0.20762	4.77386
-0.36182	-3.95733		0.21315	4.77014
-0.36244	-3.94505		0.21411	4.77923
-0.36567	-3.95588		0.22018	4.7981
-0.36613	-3.94776		0.22086	4.81413
-0.36953	-3.93938		0.22724	4.82427
-0.3697	-3.96031		0.22784	4.82573
-0.37346	-3.95894		0.23421	4.83431
-0.37347	-3.95936		0.23445	4.84177
-0.37719	-3.96885		0.24105	4.84705
-0.37719	-3.97117		0.24105	4.84662
-0.38076	-3.97187		0.24778	4.84614
-0.38076	-3.9703		0.24778	4.86137
-0.38452	-3.98547		0.25443	4.86651
-0.38452	-3.97484		0.25443	4.87231
-0.38827	-3.96961		0.26119	4.87627
-0.38827	-3.96999		0.26119	4.89621
-0.39196	-3.97091		0.26789	4.90541
-0.39484	-3.96989		0.26789	4.90136
-0.39564	-3.96703		0.27451	4.90782
-0.39874	-3.97825		0.27451	4.91252
-0.39934	-3.99196		0.28118	4.91548
-0.40265	-4.01313		0.2866	4.91723
-0.40303	-3.99123		0.28786	4.91939
-0.40651	-3.97671		0.29358	4.92377
-0.4067	-3.98164		0.29462	4.92915
-0.41042	-3.98641		0.30059	4.93581
-0.41052	-3.98936		0.30146	4.94553
-0.41432	-3.98196		0.30756	4.94628
-0.41436	-3.99066		0.30814	4.94223
-0.41806	-3.98932		0.31455	4.95179
-0.41806	-3.9831		0.31493	4.96815
-0.42191	-3.97783		0.32147	4.973
-0.42191	-3.98317		0.32147	4.97329
-0.42576	-3.97379		0.32799	4.9692
-0.42576	-3.99136		0.32799	4.97428
-0.42951	-4.00392		0.33459	4.9797
-0.42951	-3.99168		0.33459	4.98054
-0.43316	-4.00599		0.34124	4.98962
-0.43315	-4.01535		0.34124	4.99431
-0.4368	-4.00275		0.34796	4.9954
-0.43961	-3.99167		0.35294	5.00039
-0.4405	-3.99584		0.35447	5.01675
-0.44351	-4.01417		0.3599	5.02103
-0.44419	-4.02386		0.36122	5.01425
-0.44738	-4.01347		0.36685	5.01198
-0.44792	-3.99454		0.36786	5.01139
-0.45128	-3.99999		0.37384	5.01423
-0.45162	-4.00108		0.37464	5.02256
-0.45518	-4.01449		0.38084	5.02537
-0.45539	-4.02435		0.38131	5.01936
-0.45908	-4.01511		0.38789	5.02002
-0.45916	-4.01018		0.38791	5.02757
-0.46295	-4.01619		0.39453	5.03671
-0.46295	-4.02752		0.39453	5.04242
-0.4668	-4.00467		0.40121	5.04351
-0.4668	-4.0056		0.40121	5.04832
-0.47042	-4.02908		0.40811	5.05859
-0.47042	-4.02083		0.40811	5.06011
-0.47408	-4.01661		0.41495	5.06064
-0.47408	-4.02785		0.41495	5.06057
-0.47778	-4.04075		0.42184	5.0603
-0.47778	-4.02488		0.42184	5.05784
-0.48151	-4.01541		0.42874	5.0629
-0.48452	-4.01576		0.42874	5.07858
-0.48526	-4.01318		0.4356	5.07667
-0.48843	-4.01728		0.4356	5.06773
-0.48904	-4.01085		0.44216	5.07571
-0.49235	-4.01561		0.44719	5.09033
-0.49272	-4.01283		0.4487	5.09059
-0.49623	-4.0215		0.45413	5.0919
-0.49642	-4.01806		0.45549	5.08943
-0.50017	-4.0166		0.46116	5.08542
-0.50017	-4.0331		0.46224	5.09149
-0.50385	-4.046		0.46816	5.10192
-0.50385	-4.04278		0.46884	5.10565
-0.50759	-4.02741		0.47515	5.10547
-0.50759	-4.01946		0.47554	5.11059
-0.51131	-4.01518		0.48216	5.11148
-0.51131	-4.03133		0.48231	5.09739
-0.51499	-4.0343		0.48914	5.10247
-0.51779	-4.01997		0.48922	5.10709
-0.51869	-4.03312		0.49578	5.10712
-0.52168	-4.04741		0.49577	5.11117
-0.52233	-4.03661		0.50243	5.11484
-0.52562	-4.0398		0.50243	5.12194
-0.52621	-4.05539		0.50933	5.13875
-0.52951	-4.04825		0.50933	5.13891
-0.5299	-4.0505		0.51624	5.12184
-0.53343	-4.03982		0.51624	5.12316
-0.53358	-4.03549		0.5229	5.13003
-0.53724	-4.02526		0.5229	5.12991
-0.53724	-4.02015		0.52952	5.13207
-0.54097	-4.04068		0.52952	5.13945
-0.54097	-4.04569		0.53622	5.1469
-0.54485	-4.04092		0.5416	5.14733
-0.54485	-4.03851		0.54283	5.14033
-0.54849	-4.0368		0.54856	5.14309
-0.54849	-4.04547		0.54963	5.14478
-0.55218	-4.03629		0.55555	5.14648
-0.55495	-4.0361		0.55629	5.14663
-0.55584	-4.0305		0.56259	5.14148
-0.55891	-4.0236		0.56301	5.13021
-0.55967	-4.03841		0.56957	5.13236
-0.56287	-4.05835		0.56957	5.14699
-0.56346	-4.05691		0.57634	5.15492
-0.56683	-4.04496		0.57634	5.15906
-0.56716	-4.04112		0.58328	5.15786
-0.57074	-4.06317		0.58328	5.16077
-0.57088	-4.08553		0.58998	5.15743
-0.57467	-4.07663		0.58998	5.14859
-0.57467	-4.07518		0.59663	5.15586
-0.57843	-4.07313		0.59663	5.16842
-0.57843	-4.06882		0.60338	5.17263
-0.58218	-4.06934		0.60338	5.16576
-0.58218	-4.08602		0.61001	5.16291
-0.58583	-4.10583		0.61527	5.16838
-0.58583	-4.0958		0.61674	5.17955
-0.58967	-4.08381		0.62225	5.18151
-0.58967	-4.09509		0.62346	5.17891
-0.59343	-4.08298		0.62921	5.17305
-0.59642	-4.06443		0.6301	5.17309
-0.59712	-4.06694		0.63621	5.18023
-0.60036	-4.06407		0.63695	5.17846
-0.60084	-4.04656		0.64321	5.18269
-0.60433	-4.05843		0.64368	5.19333
-0.60458	-4.06111		0.65026	5.20248
-0.60825	-4.05606		0.6504	5.19752
-0.60838	-4.0594		0.65708	5.18895
-0.61215	-4.05022		0.65708	5.18825
-0.61215	-4.03408		0.66372	5.18704
-0.61587	-4.06633		0.66372	5.18368
-0.61587	-4.07201		0.67035	5.17938
-0.61976	-4.06157		0.67035	5.18253
-0.61976	-4.05558		0.67715	5.19587
-0.62347	-4.06936		0.67715	5.20748
-0.62347	-4.07621		0.68386	5.21003
-0.62714	-4.08039		0.68386	5.20302
-0.62714	-4.07734		0.69051	5.20691
-0.63093	-4.07095		0.69051	5.20769
-0.63386	-4.07967		0.69734	5.21261
-0.63467	-4.07596		0.70275	5.21706
-0.63781	-4.06753		0.70397	5.21589
-0.63841	-4.06034		0.70966	5.22002
-0.64175	-4.06091		0.71053	5.21387
-0.64225	-4.08019		0.71664	5.20987
-0.64573	-4.07054		0.71715	5.21262
-0.64605	-4.06087		0.72359	5.21526
-0.64969	-4.06573		0.72378	5.21742
-0.64975	-4.07424		0.73037	5.2256
-0.65354	-4.0797		0.73037	5.22632
-0.65354	-4.07839		0.7372	5.22091
-0.65733	-4.06962		0.7372	5.22316
-0.65733	-4.07271		0.74398	5.22564
-0.66113	-4.0757		0.74398	5.2236
-0.66113	-4.06392		0.75091	5.21568
-0.66489	-4.06073		0.75091	5.2144
-0.66489	-4.06507		0.75767	5.22959
-0.66863	-4.07881		0.75767	5.23562
-0.66863	-4.0681		0.76443	5.23824
-0.67237	-4.07607		0.76443	5.24162
-0.67542	-4.08003		0.77128	5.23694
-0.67611	-4.07824		0.77128	5.22975
-0.67939	-4.07393		0.77815	5.23519
-0.6799	-4.06737		0.77815	5.23932
-0.68338	-4.07611		0.78471	5.23944
-0.68369	-4.08706		0.78471	5.23945
-0.68733	-4.09799		0.7914	5.23418
-0.68749	-4.07763		0.79652	5.23401
-0.6912	-4.07579		0.7979	5.23727
-0.6912	-4.08931		0.80342	5.23807
-0.69493	-4.08075		0.80459	5.24487
-0.69493	-4.06215		0.81031	5.25438
-0.69861	-4.05593		0.81122	5.25985
-0.69861	-4.05622		0.81711	5.25017
-0.70247	-4.05024		0.81788	5.24567
-0.70247	-4.06451		0.82407	5.24949
-0.70623	-4.06798		0.82464	5.25203
-0.70909	-4.06096		0.83097	5.26287
-0.70998	-4.08646		0.83112	5.26655
-0.71302	-4.09047		0.83761	5.26868
-0.71376	-4.08076		0.83761	5.27047
-0.71696	-4.1013		0.84418	5.26412
-0.71752	-4.11469		0.84418	5.25981
-0.721	-4.11476		0.85057	5.26602
-0.72137	-4.10858		0.85057	5.26744
-0.7249	-4.10142		0.85716	5.27195
-0.72514	-4.10011		0.85716	5.28089
-0.72882	-4.09932		0.8636	5.28128
-0.7289	-4.09649		0.86359	5.27728
-0.73273	-4.08749		0.87028	5.28042
-0.73273	-4.10153		0.87028	5.28622
-0.73649	-4.11278		0.87698	5.28581
-0.73649	-4.10096		0.88224	5.27745
-0.74031	-4.10098		0.88342	5.27473
-0.74031	-4.10282		0.88897	5.28305
-0.74415	-4.1095		0.88986	5.29608
-0.74415	-4.119		0.89573	5.29865
-0.7479	-4.09444		0.89613	5.29669
-0.7479	-4.0731		0.9025	5.29646
-0.7517	-4.09443		0.90277	5.29354
-0.7517	-4.10252		0.90893	5.30423
-0.75558	-4.1013		0.90893	5.3084
-0.75852	-4.10031		0.91544	5.29511
-0.75926	-4.09268		0.91544	5.29121
-0.76251	-4.10957		0.92192	5.29023
-0.76319	-4.0943		0.92192	5.28921
-0.76646	-4.06921		0.92834	5.29155
-0.76702	-4.07041		0.92833	5.29818
-0.77043	-4.08978		0.93467	5.2978
-0.77081	-4.10119		0.93467	5.29165
-0.77439	-4.10991		0.94105	5.29752
-0.77453	-4.11667		0.94609	5.31
-0.77839	-4.12276		0.94751	5.30787
-0.77838	-4.11794		0.95274	5.29972
-0.78209	-4.12432		0.95392	5.29895
-0.78209	-4.13568		0.95933	5.3031
-0.78596	-4.14401		0.96048	5.30956
-0.78596	-4.13991		0.96594	5.31831
-0.78965	-4.13313		0.96675	5.31825
-0.78965	-4.13045		0.97252	5.31496
-0.79335	-4.12641		0.97315	5.31437
-0.79335	-4.12526		0.97912	5.31109
-0.79712	-4.11092		0.97935	5.30898
-0.80017	-4.12333		0.99061	5.30534
-0.80094	-4.1197		0.99061	5.30462
-0.80408	-4.10644		1.00306	5.30796
-0.80471	-4.1018		1.00306	5.30369
-0.80802	-4.1002		1.00578	5.30793
-0.80848	-4.1131		1.00578	5.31469
-0.81196	-4.10885		1.00607	5.31221
-0.8122	-4.1123		1.00607	5.30811
-0.8159	-4.12056			--
-0.81599	-4.11684			--
-0.81972	-4.11461			--
-0.81972	-4.12428			--
-0.82347	-4.12844			--
-0.82347	-4.11646			--
-0.82721	-4.1182			--
-0.82721	-4.12978			--
-0.83092	-4.13309			--
-0.83092	-4.13695			--
-0.83466	-4.12593			--
-0.83759	-4.12703			--
-0.83835	-4.12839			--
-0.84153	-4.12672			--
-0.84215	-4.12538			--
-0.84545	-4.12713			--
-0.84601	-4.12969			--
-0.84939	-4.1329			--
-0.84983	-4.13564			--
-0.85334	-4.14961			--
-0.85361	-4.15543			--
-0.85728	-4.15701			--
-0.85731	-4.15477			--
-0.86099	-4.13942			--
-0.86099	-4.14388			--
-0.86469	-4.14092
-0.86469	-4.13084
-0.86853	-4.13593
-0.86853	-4.14179
-0.87233	-4.12721
-0.87233	-4.12675
-0.87607	-4.14009
-0.87607	-4.14127
-0.87989	-4.15243
-0.87989	-4.16187
-0.88364	-4.16159
-0.8866	-4.15871
-0.88733	-4.15626
-0.89049	-4.1592
-0.89104	-4.15542
-0.89436	-4.15634
-0.89477	-4.15764
-0.89824	-4.16894
-0.8985	-4.16714
-0.90214	-4.15351
-0.90235	-4.14705
-0.90593	-4.14932
-0.90598	-4.16102
-0.90975	-4.1535
-0.90975	-4.13604
-0.91342	-4.13054
-0.91342	-4.14627
-0.91716	-4.14755
-0.91717	-4.15752
-0.92082	-4.17343
-0.92082	-4.17714
-0.92462	-4.16564
-0.92462	-4.1513
-0.92835	-4.14804
-0.92835	-4.14904
-0.932	-4.14287
-0.93492	-4.16244
-0.93577	-4.18606
-0.93879	-4.18023
-0.93949	-4.17327
-0.94262	-4.16595
-0.94325	-4.169
-0.94641	-4.16774
-0.94697	-4.15744
-0.95029	-4.15312
-0.95066	-4.15573
-0.95408	-4.1643
-0.95425	-4.16343
-0.95779	-4.15375
-0.95779	-4.15111
-0.96149	-4.16505
-0.96149	-4.17159
-0.9651	-4.15221
-0.9651	-4.15209
-0.96869	-4.17543
-0.9687	-4.16089
-0.97233	-4.15207
-0.97233	-4.15705
-0.97593	-4.15293
-0.97873	-4.15195
-0.97957	-4.15789
-0.98243	-4.16875
-0.98304	-4.15965
-0.98618	-4.14251
-0.98672	-4.14715
-0.9899	-4.14916
-0.99041	-4.13602
-0.99357	-4.13664
-0.9939	-4.1437
-0.99731	-4.16274
-0.9975	-4.1506
-1.00195	-4.12015
-1.00199	-4.1426
-1.00291	-4.15958
-1.00291	-4.17432
-1.0023	-4.15967
-1.00229	-4.1697
-0.9996	-4.17481
-0.9996	-4.17664
-0.99625	-4.15737
-0.99625	-4.16064
-0.99274	-4.1832
-0.99008	-4.17661
-0.98928	-4.16085
-0.98629	-4.15245
-0.98564	-4.16923
-0.9825	-4.16458
-0.98195	-4.14575
-0.97873	-4.15364
-0.97839	-4.16953
-0.9749	-4.16705
-0.97464	-4.17229
-0.97112	-4.16848
-0.97103	-4.175
-0.96738	-4.18194
-0.96738	-4.17191
-0.96364	-4.16804
-0.96364	-4.16297
-0.95994	-4.16538
-0.95994	-4.1584
-0.95635	-4.14828
-0.95635	-4.14085
-0.95266	-4.13793
-0.95266	-4.13287
-0.94897	-4.14393
-0.94614	-4.15575
-0.9453	-4.17499
-0.94226	-4.17382
-0.94161	-4.16874
-0.93843	-4.17917
-0.93801	-4.1728
-0.93453	-4.16291
-0.93419	-4.16163
-0.93067	-4.15024
-0.93035	-4.14825
-0.92675	-4.15228
-0.92649	-4.15514
-0.92282	-4.15186
-0.92278	-4.16718
-0.91906	-4.165
-0.91906	-4.13847
-0.9154	-4.13909
-0.9154	-4.14974
-0.91166	-4.15317
-0.91166	-4.16159
-0.90792	-4.16148
-0.90792	-4.15102
-0.90417	-4.16436
-0.90417	-4.17888
-0.90045	-4.17493
-0.90045	-4.15915
-0.89663	-4.14425
-0.89368	-4.15112
-0.89295	-4.15575
-0.88975	-4.15449
-0.88908	-4.15562
-0.88587	-4.13526
-0.88527	-4.14
-0.88198	-4.14934
-0.8816	-4.15142
-0.87803	-4.14396
-0.87778	-4.12925
-0.8741	-4.13369
-0.87406	-4.12774
-0.87026	-4.12836
-0.87026	-4.13065
-0.86659	-4.12347
-0.86659	-4.1337
-0.86283	-4.13011
-0.86283	-4.10879
-0.85899	-4.10164
-0.85898	-4.11565
-0.85529	-4.10251
-0.85244	-4.09631
-0.85157	-4.10016
-0.84852	-4.09793
-0.84777	-4.08542
-0.84451	-4.10169
-0.84391	-4.11886
-0.84057	-4.10446
-0.84019	-4.09783
-0.83661	-4.09687
-0.83644	-4.09301
-0.8327	-4.08797
-0.8327	-4.08425
-0.82882	-4.0885
-0.82882	-4.09508
-0.82504	-4.08675
-0.82504	-4.07825
-0.82125	-4.08878
-0.82125	-4.0961
-0.81756	-4.09557
-0.81756	-4.09297
-0.81376	-4.08507
-0.81094	-4.08419
-0.81007	-4.10079
-0.80698	-4.08703
-0.80619	-4.08213
-0.80308	-4.08919
-0.80246	-4.08301
-0.79914	-4.08224
-0.79879	-4.09963
-0.79521	-4.09352
-0.79509	-4.07346
-0.79137	-4.06612
-0.79136	-4.06652
-0.78769	-4.0955
-0.78769	-4.11191
-0.7838	-4.10776
-0.7838	-4.0895
-0.78008	-4.10226
-0.78008	-4.12276
-0.77609	-4.11392
-0.7761	-4.1092
-0.77221	-4.11465
-0.77222	-4.11145
-0.76844	-4.1131
-0.76544	-4.10545
-0.76455	-4.09706
-0.76147	-4.08449
-0.76072	-4.09022
-0.75745	-4.08423
-0.75686	-4.09272
-0.75349	-4.09732
-0.75311	-4.07863
-0.74954	-4.10066
-0.74939	-4.10646
-0.74561	-4.08496
-0.74556	-4.09484
-0.74169	-4.08911
-0.74169	-4.08248
-0.73772	-4.06919
-0.73772	-4.06608
-0.73396	-4.07461
-0.73397	-4.08278
-0.73017	-4.07847
-0.73017	-4.0795
-0.72633	-4.08472
-0.72634	-4.08413
-0.72245	-4.07986
-0.72245	-4.09133
-0.71871	-4.07313
-0.71871	-4.04879
-0.71499	-4.05476
-0.71195	-4.06642
-0.71125	-4.08359
-0.708	-4.07789
-0.70744	-4.08398
-0.70404	-4.07756
-0.7036	-4.06943
-0.70008	-4.05427
-0.69988	-4.02766
-0.6962	-4.04229
-0.6962	-4.05119
-0.69245	-4.03869
-0.69244	-4.03561
-0.68868	-4.03722
-0.68869	-4.03602
-0.68475	-4.04949
-0.68475	-4.06575
-0.68091	-4.05028
-0.68091	-4.03829
-0.677	-4.03301
-0.677	-4.03486
-0.67313	-4.05033
-0.67313	-4.05729
-0.66935	-4.05098
-0.66642	-4.03921
-0.66562	-4.05168
-0.66244	-4.06412
-0.66187	-4.07409
-0.65847	-4.09974
-0.65804	-4.08717
-0.6545	-4.05568
-0.65427	-4.05431
-0.65057	-4.07289
-0.65051	-4.05593
-0.64671	-4.05112
-0.64671	-4.06892
-0.64301	-4.05382
-0.643	-4.02913
-0.63912	-4.03584
-0.63912	-4.04111
-0.63535	-4.05636
-0.63535	-4.05751
-0.63156	-4.04741
-0.6288	-4.04499
-0.62792	-4.04058
-0.62486	-4.04472
-0.62406	-4.03673
-0.62089	-4.02938
-0.62033	-4.03107
-0.61695	-4.02762
-0.61662	-4.02791
-0.61302	-4.02997
-0.61289	-4.02862
-0.60909	-4.02827
-0.60906	-4.0324
-0.60538	-4.03583
-0.60538	-4.03129
-0.60163	-4.04179
-0.60163	-4.03713
-0.59787	-4.01297
-0.59787	-4.0034
-0.59405	-3.99709
-0.59405	-3.99557
-0.59027	-3.99405
-0.59026	-3.98556
-0.58645	-3.98592
-0.58343	-3.99233
-0.58259	-3.9892
-0.57946	-4.01065
-0.57865	-4.01233
-0.57552	-4.00244
-0.57494	-4.00526
-0.57156	-4.00667
-0.57114	-4.00561
-0.56761	-4.00008
-0.56729	-3.99679
-0.56367	-3.98371
-0.56337	-3.98854
-0.55972	-3.98236
-0.55946	-3.99738
-0.55573	-4.01046
-0.5557	-4.00855
-0.55199	-4.03764
-0.55199	-4.05645
-0.54819	-4.05154
-0.54819	-4.03759
-0.54438	-4.01691
-0.54438	-4.01846
-0.54074	-4.03237
-0.54074	-4.03454
-0.53697	-4.03118
-0.53697	-4.01543
-0.53326	-4.01089
-0.53021	-4.02438
-0.52948	-4.01682
-0.52634	-4.01514
-0.52587	-4.01806
-0.52244	-3.99932
-0.52219	-3.99747
-0.51852	-3.99935
-0.51842	-4.0163
-0.5146	-4.01778
-0.5146	-4.00047
-0.51091	-4.00916
-0.51091	-4.01717
-0.50711	-4.00617
-0.50711	-4.00541
-0.50322	-4.00626
-0.50322	-3.99972
-0.49941	-4.01306
-0.49941	-4.01767
-0.49574	-3.99749
-0.49574	-3.99061
-0.49197	-3.99919
-0.48912	-3.99377
-0.48828	-3.99763
-0.48524	-4.00972
-0.4845	-3.99343
-0.48127	-4.00125
-0.48069	-3.99584
-0.47732	-3.98192
-0.47688	-3.99375
-0.47342	-3.99428
-0.47312	-3.9787
-0.46947	-3.98611
-0.46934	-3.97757
-0.46558	-3.98547
-0.46558	-3.99047
-0.46175	-3.97117
-0.46175	-3.96729
-0.45815	-3.9761
-0.45815	-3.98341
-0.45435	-3.98996
-0.45435	-3.99432
-0.45061	-3.9895
-0.45061	-3.96432
-0.4469	-3.92793
-0.4469	-3.9085
-0.44298	-3.94295
-0.44013	-3.97374
-0.43932	-3.96771
-0.43619	-3.95992
-0.43567	-3.95919
-0.43232	-3.96851
-0.43198	-3.97976
-0.42836	-3.97308
-0.42831	-3.96136
-0.42463	-3.97295
-0.42463	-3.96385
-0.42076	-3.96011
-0.42076	-3.97106
-0.41691	-3.95718
-0.41691	-3.94267
-0.41312	-3.95317
-0.41312	-3.95923
-0.40943	-3.94282
-0.40943	-3.92591
-0.40569	-3.9439
-0.40569	-3.97164
-0.40201	-3.96625
-0.39908	-3.9561
-0.39827	-3.9461
-0.39512	-3.9397
-0.39448	-3.94026
-0.39116	-3.94328
-0.39079	-3.94816
-0.38733	-3.95038
-0.38719	-3.94
-0.38343	-3.9484
-0.38343	-3.95287
-0.37973	-3.93626
-0.37973	-3.93007
-0.37588	-3.93042
-0.37588	-3.93988
-0.37207	-3.94814
-0.37207	-3.92161
-0.36841	-3.91944
-0.36841	-3.93935
-0.36477	-3.93789
-0.36477	-3.94285
-0.361	-3.95118
-0.35805	-3.93686
-0.35739	-3.92252
-0.35417	-3.92516
-0.3537	-3.92256
-0.35023	-3.92196
-0.34989	-3.91916
-0.34637	-3.90753
-0.34615	-3.90459
-0.34248	-3.90202
-0.34248	-3.90772
-0.33871	-3.9061
-0.33871	-3.90771
-0.33501	-3.8921
-0.33501	-3.88192
-0.33133	-3.88291
-0.33133	-3.8734
-0.32767	-3.87569
-0.32767	-3.87686
-0.32385	-3.88263
-0.32385	-3.89481
-0.32003	-3.88959
-0.31704	-3.88051
-0.31625	-3.86591
-0.31318	-3.8618
-0.31264	-3.88081
-0.30927	-3.87137
-0.30884	-3.85129
-0.30532	-3.86191
-0.30513	-3.86783
-0.3014	-3.85447
-0.3014	-3.85407
-0.29768	-3.87001
-0.29768	-3.87102
-0.29396	-3.85237
-0.29396	-3.83122
-0.29016	-3.82496
-0.29016	-3.82977
-0.28641	-3.83095
-0.28641	-3.84598
-0.28257	-3.8598
-0.28257	-3.83728
-0.2787	-3.82916
-0.2787	-3.82997
-0.27488	-3.82412
-0.27488	-3.8116
-0.27115	-3.80743
-0.26817	-3.81724
-0.26753	-3.8147
-0.26427	-3.81511
-0.26377	-3.81377
-0.26039	-3.82075
-0.26007	-3.84737
-0.25645	-3.82709
-0.25615	-3.81125
-0.25253	-3.80967
-0.25236	-3.79829
-0.24872	-3.79373
-0.24872	-3.77302
-0.24495	-3.77161
-0.24495	-3.77547
-0.24137	-3.7805
-0.24137	-3.7757
-0.23774	-3.75064
-0.23774	-3.75378
-0.23396	-3.75431
-0.23103	-3.74154
-0.23019	-3.74407
-0.22712	-3.7376
-0.22642	-3.72759
-0.22317	-3.72171
-0.22262	-3.71783
-0.21931	-3.72125
-0.21887	-3.72564
-0.21533	-3.72473
-0.21501	-3.71981
-0.21141	-3.69885
-0.21123	-3.69294
-0.20755	-3.70626
-0.20755	-3.69977
-0.20391	-3.69629
-0.20391	-3.70092
-0.20008	-3.68358
-0.20008	-3.67835
-0.19636	-3.68175
-0.19636	-3.68232
-0.19263	-3.6779
-0.19263	-3.671
-0.18875	-3.66279
-0.18583	-3.65329
-0.18499	-3.65438
-0.18192	-3.6545
-0.18127	-3.64157
-0.17802	-3.64225
-0.17747	-3.65043
-0.17415	-3.64125
-0.17389	-3.62187
-0.17022	-3.61959
-0.17009	-3.594
-0.1664	-3.57953
-0.16639	-3.58024
-0.16267	-3.57621
-0.16267	-3.57233
-0.15894	-3.56121
-0.15894	-3.55515
-0.15521	-3.56472
-0.15521	-3.55538
-0.15147	-3.52673
-0.15147	-3.51863
-0.14779	-3.51673
-0.14477	-3.50671
-0.14404	-3.50454
-0.14084	-3.49313
-0.14032	-3.47657
-0.13693	-3.46205
-0.1366	-3.45458
-0.13301	-3.46142
-0.13285	-3.45409
-0.12914	-3.42499
-0.12914	-3.41215
-0.12537	-3.39305
-0.12537	-3.38621
-0.12172	-3.39165
-0.12172	-3.38905
-0.11788	-3.3779
-0.11788	-3.35382
-0.11414	-3.33724
-0.1113	-3.31593
-0.1104	-3.30535
-0.10735	-3.29526
-0.10669	-3.2785
-0.10271	-3.27065
-0.10214	-3.25439
-0.10075	-3.23299
-0.10059	-3.23843
-0.10044	-3.24256
-0.10043	-3.24547
-0.09989	-3.2408
-0.09988	-3.22859
-0.09908	-3.22678
-0.09908	-3.22539
-0.09811	-3.22374
-0.09811	-3.2186
-0.09707	-3.21047
-0.09707	-3.21541
-0.09596	-3.20881
-0.09596	-3.20053
-0.09485	-3.18835
-0.09394	-3.17533
-0.09372	-3.17209
-0.09273	-3.19134
-0.09253	-3.18832
-0.09152	-3.17873
-0.09138	-3.1564
-0.09025	-3.13831
-0.09014	-3.14243
-0.08898	-3.14015
-0.08895	-3.14171
-0.08783	-3.13065
-0.08783	-3.1184
-0.08657	-3.12398
-0.08657	-3.12157
-0.08536	-3.10732
-0.08536	-3.08905
-0.08417	-3.07894
-0.08417	-3.07683
-0.08299	-3.08083
-0.08299	-3.0737
-0.08185	-3.07598
-0.08091	-3.07989
-0.08063	-3.06478
-0.07964	-3.05447
-0.07942	-3.03714
-0.07838	-3.02684
-0.07823	-3.0235
-0.07712	-3.00696
-0.07704	-2.9916
-0.07591	-2.99682
-0.07591	-2.99295
-0.07468	-2.97905
-0.07468	-2.97694
-0.07354	-2.96331
-0.07354	-2.94966
-0.07241	-2.95084
-0.07241	-2.93955
-0.07116	-2.94171
-0.07116	-2.92855
-0.07	-2.91062
-0.06904	-2.90638
-0.06876	-2.88621
-0.06781	-2.86928
-0.06759	-2.87738
-0.06656	-2.8697
-0.06639	-2.86104
-0.06528	-2.85237
-0.06516	-2.83512
-0.06403	-2.82295
-0.06399	-2.81665
-0.0628	-2.81287
-0.0628	-2.79846
-0.06165	-2.7786
-0.06165	-2.76232
-0.06044	-2.75461
-0.06044	-2.74497
-0.05921	-2.72549
-0.05921	-2.71538
-0.05801	-2.69917
-0.05801	-2.68991
-0.05685	-2.67782
-0.05685	-2.6602
-0.05564	-2.65606
-0.05471	-2.65016
-0.05449	-2.64229
-0.05346	-2.62473
-0.05331	-2.59888
-0.05225	-2.5945
-0.05219	-2.58577
-0.05096	-2.56692
-0.05091	-2.55863
-0.04975	-2.54187
-0.04975	-2.51434
-0.04852	-2.5048
-0.04852	-2.49912
-0.04737	-2.48262
-0.04737	-2.46038
-0.04596	-2.44545
-0.04596	-2.43558
-0.04472	-2.4148
-0.04472	-2.38083
-0.0435	-2.3616
-0.04256	-2.3515
-0.04229	-2.33782
-0.04128	-2.32595
-0.04108	-2.31618
-0.04003	-2.2944
-0.0399	-2.27392
-0.03877	-2.25523
-0.03867	-2.23298
-0.03754	-2.21236
-0.03746	-2.19449
-0.03637	-2.18398
-0.03633	-2.15424
-0.03513	-2.12958
-0.03513	-2.11122
-0.03396	-2.08705
-0.03396	-2.06955
-0.03275	-2.05039
-0.03275	-2.0226
-0.03165	-1.99412
-0.03165	-1.97009
-0.0305	-1.95214
-0.02955	-1.92916
-0.0293	-1.90696
-0.02831	-1.88118
-0.02807	-1.8431
-0.02705	-1.80827
-0.02682	-1.78867
-0.02583	-1.76702
-0.0257	-1.73696
-0.02457	-1.71156
-0.02449	-1.68466
-0.02339	-1.65332
-0.02334	-1.62205
-0.02215	-1.59159
-0.02215	-1.5589
-0.02096	-1.52539
-0.02096	-1.49286
-0.01978	-1.45175
-0.01978	-1.4178
-0.01864	-1.38168
-0.01864	-1.34614
-0.01744	-1.31767
-0.01744	-1.28551
-0.0162	-1.24302
-0.0162	-1.20109
-0.01519	-1.17321
-0.01488	-1.15776
-0.0148	-1.15551
-0.0149	-1.15596
-0.01492	-1.16827
-0.01545	-1.1923
-0.01551	-1.20241
-0.01628	-1.22612
-0.01636	-1.25716
-0.01725	-1.28593
-0.0173	-1.3141
-0.01833	-1.3442
-0.01834	-1.37902
-0.01944	-1.41075
-0.01944	-1.44634
-0.02062	-1.48477
-0.02062	-1.51458
-0.02178	-1.53965
-0.02178	-1.57336
-0.02285	-1.60982
-0.02285	-1.6406
-0.02409	-1.66444
-0.02409	-1.69015
-0.0253	-1.71949
-0.02624	-1.7515
-0.0265	-1.77046
-0.02745	-1.79953
-0.02767	-1.83593
-0.02872	-1.85801
-0.02891	-1.88813
-0.02998	-1.90257
-0.03011	-1.92465
-0.03124	-1.95564
-0.03133	-1.97966
-0.03247	-2.00505
-0.03248	-2.03369
-0.03363	-2.05911
-0.03363	-2.07493
-0.03481	-2.09501
-0.0348	-2.10854
-0.03606	-2.12561
-0.03606	-2.15526
-0.03727	-2.18243
-0.03727	-2.19989
-0.03847	-2.21566
-0.03847	-2.23591
-0.03973	-2.25568
-0.03973	-2.27436
-0.04093	-2.29028
-0.0419	-2.29638
-0.04217	-2.31659
-0.04332	-2.3429
-0.04354	-2.359
-0.04468	-2.37649
-0.04483	-2.4015
-0.04604	-2.41401
-0.04614	-2.42706
-0.04737	-2.44649
-0.0474	-2.47011
-0.04864	-2.49259
-0.04865	-2.51091
-0.0499	-2.52389
-0.0499	-2.53645
-0.05118	-2.54606
-0.05118	-2.56232
-0.05242	-2.56878
-0.05242	-2.58413
-0.05363	-2.60398
-0.05363	-2.61047
-0.05478	-2.62886
-0.05478	-2.64734
-0.056	-2.65736
-0.056	-2.66389
-0.0572	-2.67686
-0.05817	-2.6963
-0.0584	-2.7008
-0.05941	-2.7129
-0.05961	-2.72659
-0.0607	-2.73967
-0.06087	-2.75684
-0.06197	-2.75725
-0.06208	-2.76011
-0.06316	-2.78412
-0.06322	-2.79928
-0.06445	-2.79776
-0.06445	-2.80213
-0.06567	-2.81917
-0.06567	-2.8387
-0.06695	-2.84967
-0.06695	-2.84779
-0.06813	-2.85314
-0.06813	-2.86904
-0.06932	-2.87744
-0.06932	-2.87394
-0.07051	-2.88733
-0.07051	-2.89167
-0.07176	-2.8973
-0.07176	-2.91226
-0.07295	-2.93453
-0.07391	-2.94668
-0.07413	-2.94848
-0.07517	-2.96482
-0.07532	-2.97157
-0.07641	-2.96504
-0.07651	-2.98813
-0.07769	-2.99802
-0.07779	-2.98618
-0.07894	-2.99312
-0.07896	-3.00801
-0.08015	-3.01652
-0.08015	-3.03637
-0.08136	-3.05065
-0.08136	-3.04377
-0.0826	-3.04236
-0.0826	-3.05886
-0.08377	-3.05859
-0.08377	-3.06816
-0.08505	-3.08841
-0.08505	-3.10065
-0.08622	-3.105
-0.08622	-3.10383
-0.08741	-3.10004
-0.08834	-3.11503
-0.08858	-3.12943
-0.08961	-3.13416
-0.08979	-3.13389
-0.09083	-3.1314
-0.09097	-3.14415
-0.09214	-3.15146
-0.09223	-3.15325
-0.09339	-3.15702
-0.09342	-3.16595
-0.0946	-3.17938
-0.0946	-3.18526
-0.09584	-3.18501
-0.09584	-3.19331
[truncated: 578 more rows]
