# Supplementary material for: Cork-derived magnetic composites: a preliminary study
Source: Royal Society of Chemistry journal article supplement (doi:10.1039/d4su00442f), 2024-12-11
Supplement: d4su00442f7.xlsx [file d4su00442f7.xlsx]

## Sheet: Figure 8a
			water			chloroform
1.0002	1		1.00393	0.90446		1.00525	0.35096
1.00056	0.99986		1.00393	0.90673		1.00525	0.35089
1.00056	0.99985		1.00595	0.90325		1.006	0.34942
1.00056	0.99965		1.00595	0.90333		1.006	0.35009
1.00056	0.99962		1.00541	0.90398		1.00416	0.35002
0.96363	0.99471		1.00182	0.90037		1.00416	0.34868
0.96363	0.99476		1.00083	0.89928		0.9979	0.34794
0.96363	0.99452		0.99196	0.89421		0.98879	0.34867
0.96332	0.99419		0.99036	0.88799		0.98646	0.34911
0.96326	0.99424		0.98027	0.89192		0.97852	0.34894
0.93546	0.9887		0.97934	0.89895		0.97724	0.34956
0.93546	0.98866		0.9733	0.89968		0.97149	0.34905
0.9351	0.98856		0.97317	0.89703		0.97097	0.34833
0.93503	0.98844		0.96669	0.89633		0.96489	0.34894
0.93496	0.9883		0.96669	0.89361		0.96451	0.35018
0.90613	0.98356		0.96017	0.89061		0.95819	0.35094
0.90601	0.98337		0.96017	0.89161		0.95803	0.35234
0.90588	0.98329		0.95364	0.89425		0.95157	0.352
0.90671	0.98333		0.95364	0.89597		0.95157	0.35015
0.90671	0.98314		0.94722	0.89479		0.94522	0.34849
0.87675	0.97658		0.94722	0.89245		0.94522	0.34812
0.87648	0.97634		0.94083	0.89117		0.93876	0.34979
0.87648	0.97629		0.94083	0.89197		0.93876	0.35063
0.87648	0.97647		0.93415	0.89516		0.93231	0.35146
0.87648	0.97679		0.93415	0.89401		0.93231	0.35155
0.84754	0.9716		0.92744	0.89061		0.92596	0.35134
0.84746	0.9713		0.92744	0.89054		0.92596	0.35213
0.84746	0.97096		0.92087	0.88939		0.91935	0.35268
0.84746	0.97063		0.92087	0.89104		0.91437	0.35268
0.84746	0.97057		0.91457	0.89105		0.9129	0.35202
0.81835	0.96415		0.90941	0.88992		0.90759	0.35067
0.81835	0.96418		0.90816	0.88778		0.90651	0.35027
0.81835	0.96388		0.90265	0.88344		0.90089	0.35036
0.81835	0.96353		0.90174	0.88242		0.90018	0.35094
0.81791	0.96333		0.89588	0.88494		0.89409	0.3517
0.78865	0.95482		0.89541	0.88454		0.89349	0.3526
0.78865	0.95441		0.88908	0.88351		0.88728	0.35351
0.78865	0.95441		0.88895	0.88105		0.8871	0.35459
0.78826	0.95447		0.88248	0.87954		0.88071	0.35677
0.78818	0.95439		0.88248	0.88347		0.88071	0.35809
0.75952	0.94675		0.87609	0.88745		0.87421	0.35784
0.75879	0.94656		0.87609	0.88662		0.87421	0.35745
0.75862	0.94625		0.86961	0.88303		0.86752	0.35769
0.75845	0.9462		0.86961	0.88184		0.86752	0.35754
0.75829	0.94618		0.86311	0.8814		0.86094	0.35816
0.72925	0.93739		0.86311	0.8797		0.86094	0.35905
0.72908	0.93706		0.85668	0.8803		0.85428	0.35997
0.72892	0.93684		0.85152	0.88124		0.85428	0.35964
0.72887	0.93667		0.84998	0.87997		0.84781	0.35851
0.72887	0.93655		0.84464	0.87994		0.8428	0.35942
0.69905	0.92809		0.84349	0.88098		0.84133	0.3596
0.69905	0.92761		0.83773	0.87928		0.83594	0.35803
0.69905	0.92729		0.83692	0.87772		0.8348	0.35724
0.69905	0.92716		0.83087	0.87613		0.82905	0.3561
0.69905	0.92688		0.83042	0.87835		0.82813	0.35328
0.66982	0.91689		0.82396	0.88125		0.82212	0.35034
0.66982	0.91661		0.82364	0.8803		0.82129	0.35
0.66982	0.91658		0.81709	0.87658		0.81521	0.3496
0.66982	0.91645		0.81709	0.87593		0.81465	0.34879
0.66914	0.91631		0.81035	0.87672		0.80837	0.35142
0.63994	0.90464		0.81035	0.8787		0.80815	0.35014
0.63994	0.90458		0.80382	0.87765		0.80163	0.34722
0.63926	0.90459		0.80382	0.87619		0.80163	0.3467
0.63911	0.9046		0.79706	0.87694		0.79504	0.34493
0.63897	0.90464		0.79706	0.87717		0.79504	0.34509
0.61041	0.89326		0.79028	0.87477		0.78848	0.34435
0.60966	0.89293		0.79028	0.87445		0.78848	0.3436
0.6095	0.89275		0.78382	0.87439		0.78191	0.34557
0.60935	0.8926		0.78382	0.87365		0.78191	0.34714
0.61041	0.89227		0.77698	0.87446		0.77513	0.34804
0.58001	0.87926		0.77698	0.87166		0.77513	0.34973
0.57976	0.87909		0.77038	0.86914		0.76851	0.35119
0.57952	0.87896		0.76517	0.86992		0.76338	0.35096
0.58113	0.87888		0.76378	0.87139		0.76194	0.35164
0.58113	0.87871		0.75824	0.87595		0.75641	0.3537
0.54963	0.86467		0.75719	0.87612		0.75535	0.35444
0.54936	0.86427		0.75129	0.8708		0.74942	0.35573
0.54931	0.86401		0.75033	0.86905		0.74881	0.3563
0.54931	0.86378		0.74434	0.8685		0.74243	0.35606
0.54931	0.86325		0.74373	0.86629		0.74231	0.35608
0.51936	0.84806		0.73734	0.86678		0.73547	0.35653
0.51919	0.84753		0.73694	0.86754		0.73543	0.35703
0.51919	0.84713		0.73035	0.86196		0.72853	0.35493
0.51919	0.8469		0.73035	0.86043		0.72853	0.3534
0.51919	0.84684		0.7238	0.86384		0.72196	0.35268
0.48937	0.82938		0.72381	0.86311		0.72196	0.35054
0.48937	0.82899		0.71711	0.86238		0.71516	0.34993
0.48937	0.82881		0.71711	0.86182		0.71516	0.35168
0.48937	0.82876		0.71045	0.85997		0.70851	0.35129
0.48907	0.8286		0.71046	0.85999		0.70851	0.34965
0.45987	0.81013		0.70383	0.86075		0.7019	0.34917
0.45987	0.80948		0.70383	0.86076		0.7019	0.34883
0.45987	0.80909		0.69717	0.85876		0.69524	0.34864
0.45935	0.80874		0.69717	0.8558		0.69524	0.34914
0.45923	0.80866		0.69037	0.8553		0.68838	0.34806
0.43018	0.788		0.68507	0.8559		0.68324	0.34659
0.43018	0.7877		0.68358	0.85393		0.68179	0.34608
0.42935	0.78764		0.6781	0.85012		0.67626	0.34647
0.42917	0.78722		0.67693	0.85218		0.67523	0.34392
0.429	0.78688		0.67111	0.85245		0.66925	0.34024
0.39975	0.76475		0.67017	0.85103		0.66842	0.34195
0.39953	0.76412		0.66411	0.85216		0.66224	0.34096
0.39932	0.76361		0.66349	0.85222		0.66165	0.33657
0.3991	0.76311		0.65713	0.8493		0.65524	0.33601
0.40063	0.76286		0.65691	0.84773		0.65499	0.33961
0.36974	0.738		0.65019	0.84685		0.64831	0.3412
0.36946	0.73745		0.6448	0.84518		0.64831	0.34071
0.36919	0.73695		0.64359	0.84487		0.64176	0.34079
0.37111	0.73648		0.63779	0.84403		0.64176	0.34342
0.37111	0.73605		0.63693	0.84165		0.6352	0.34569
0.33959	0.70781		0.63079	0.83953		0.63519	0.34634
0.33933	0.70733		0.63008	0.84006		0.62833	0.347
0.33933	0.70675		0.62377	0.83992		0.62833	0.34646
0.33933	0.70637		0.62317	0.83792		0.62173	0.34626
0.33933	0.70612		0.61681	0.83707		0.62173	0.34646
0.30959	0.67427		0.61644	0.83677		0.61496	0.34482
0.30959	0.67369		0.60984	0.83743		0.60973	0.34254
0.30959	0.67334		0.60978	0.83806		0.60831	0.34272
0.3094	0.67307		0.60315	0.83564		0.60274	0.34408
0.30935	0.67274		0.60315	0.83394		0.60155	0.34471
0.28	0.63783		0.59657	0.83414		0.59573	0.34418
0.28	0.63686		0.59657	0.83225		0.5948	0.3433
0.28	0.63626		0.58991	0.82838		0.58869	0.34278
0.27924	0.63584		0.58991	0.82723		0.58798	0.34224
0.27908	0.63555		0.58332	0.82841		0.58167	0.34214
0.24943	0.59496		0.57823	0.82837		0.58121	0.34101
0.24924	0.59425		0.57668	0.82747		0.5746	0.33963
0.24904	0.59378		0.57122	0.82342		0.57445	0.3395
0.24885	0.5934		0.56988	0.81863		0.56778	0.3398
0.25022	0.5932		0.56417	0.81645		0.56778	0.34038
0.21981	0.54827		0.56316	0.81616		0.56094	0.34063
0.21951	0.54733		0.55712	0.81757		0.56094	0.33975
0.21921	0.54661		0.55634	0.81669		0.55402	0.33884
0.22133	0.546		0.55008	0.81316		0.55402	0.33875
0.22133	0.54566		0.54958	0.8116		0.54742	0.33792
0.18934	0.49549		0.54313	0.80877		0.54742	0.33598
0.18889	0.49427		0.54293	0.80504		0.54073	0.33519
0.18873	0.49332		0.53638	0.80376		0.54073	0.33563
0.18873	0.49271		0.53638	0.8045		0.53413	0.33565
0.18873	0.4924		0.52978	0.80364		0.52905	0.33449
0.15897	0.43512		0.52978	0.80152		0.52748	0.33282
0.15897	0.43424		0.52318	0.79952		0.52198	0.33185
0.15897	0.43348		0.52318	0.79848		0.5207	0.33123
0.15897	0.43287		0.51652	0.79854		0.51501	0.33105
0.15886	0.43256		0.51652	0.79543		0.51413	0.3306
0.12936	0.37018		0.50965	0.79263		0.50803	0.32946
0.12936	0.36899		0.50965	0.79216		0.50751	0.33022
0.12936	0.36803		0.5028	0.79019		0.50099	0.33116
0.12898	0.36733		0.49758	0.78554		0.50071	0.32962
0.1289	0.36676		0.49607	0.78348		0.49402	0.32636
0.09948	0.29489		0.49053	0.78151		0.49397	0.3255
0.09873	0.29374		0.48921	0.78072		0.48722	0.3241
0.09855	0.29292		0.48351	0.78016		0.48722	0.3227
0.09838	0.2923		0.48258	0.7784		0.48052	0.32301
0.0982	0.29192		0.47653	0.77739		0.48052	0.32379
0.08839	0.26617		0.47603	0.77425		0.47397	0.32408
0.08839	0.26553		0.46949	0.77286		0.47397	0.32441
0.08832	0.26518		0.46942	0.77118		0.46721	0.32414
0.0883	0.26489		0.46273	0.76944		0.46721	0.32244
0.08828	0.26468		0.46273	0.76884		0.46046	0.32058
0.07816	0.23896		0.45606	0.76669		0.46046	0.31944
0.07813	0.23825		0.45605	0.76323		0.45352	0.31906
0.07813	0.23782		0.44942	0.76145		0.44834	0.31831
0.07813	0.23735		0.44942	0.76158		0.44681	0.31694
0.07813	0.23709		0.44265	0.75792		0.44136	0.31634
0.06848	0.21131		0.44265	0.75176		0.44013	0.31588
0.06832	0.21057		0.43596	0.75005		0.43434	0.31559
0.06815	0.21004		0.43595	0.75021		0.43337	0.31556
0.06815	0.20968		0.42921	0.74721		0.42732	0.31537
0.06815	0.2096		0.4239	0.74407		0.42667	0.31432
0.05875	0.18319		0.42262	0.74204		0.42032	0.31263
0.05848	0.18249		0.41688	0.73914		0.42	0.31116
0.05842	0.18192		0.41593	0.73831		0.41335	0.30995
0.05836	0.18143		0.40985	0.73695		0.41336	0.30932
0.05875	0.18102		0.40946	0.73212		0.40681	0.30868
0.0485	0.15361		0.40287	0.72904		0.40681	0.3071
0.0485	0.15291		0.40277	0.72814		0.39998	0.3049
0.0485	0.15234		0.39577	0.72488		0.39998	0.30279
0.04824	0.15186		0.39577	0.7223		0.39345	0.30196
0.04818	0.15151		0.38922	0.72086		0.39345	0.30192
0.03799	0.12318		0.38921	0.71883		0.3869	0.30126
0.03781	0.12246		0.38249	0.71478		0.3817	0.29977
0.03781	0.12182		0.38249	0.71131		0.38032	0.29809
0.03781	0.1212		0.37582	0.70903		0.37469	0.29641
0.03781	0.12086		0.37582	0.70701		0.37369	0.29515
0.0284	0.09304		0.36911	0.70381		0.36764	0.29385
0.02823	0.09241		0.36911	0.7009		0.36701	0.29246
0.02816	0.09189		0.36238	0.69944		0.3607	0.29265
0.02816	0.09141		0.35724	0.69503		0.3604	0.29274
0.02816	0.0912		0.35566	0.68921		0.35367	0.2918
0.01899	0.06325		0.35025	0.68664		0.35361	0.29057
0.01831	0.06253		0.34896	0.68583		0.3468	0.28867
0.01818	0.06186		0.34325	0.68297		0.3468	0.28626
0.01805	0.06129		0.34231	0.67928		0.34016	0.28512
0.01899	0.06096		0.33624	0.67642		0.34016	0.28457
0.00837	0.032		0.33553	0.67267		0.33372	0.28347
0.00829	0.03124		0.32927	0.66912		0.33372	0.28245
0.00821	0.03059		0.32892	0.66577		0.32679	0.28085
0.00813	0.03011		0.32227	0.66264		0.32679	0.27865
0.00867	0.0298		0.32227	0.65847		0.32016	0.27688
-0.00055873	0.00292		0.3156	0.65401		0.32016	0.27547
-0.00125	0.00204		0.3156	0.65106		0.31329	0.2746
-0.00141	0.00143		0.30872	0.64742		0.30808	0.27448
-0.00158	0.000850875		0.30872	0.64199		0.30663	0.27305
-0.00174	0.000403467		0.3019	0.63793		0.30106	0.27093
-0.01164	-0.03067		0.3019	0.63435		0.29989	0.26847
-0.01176	-0.0315		0.29526	0.62966		0.29409	0.26613
-0.01189	-0.0322		0.29526	0.62572		0.29324	0.26496
-0.01191	-0.03271		0.28851	0.62265		0.28702	0.26368
-0.01191	-0.03304		0.28851	0.61912		0.28666	0.26121
-0.02154	-0.06169		0.28176	0.61527		0.28004	0.2589
-0.02166	-0.06241		0.27655	0.61054		0.28004	0.25762
-0.02179	-0.06298		0.27508	0.60559		0.27359	0.25648
-0.02179	-0.06346		0.2695	0.60165		0.27359	0.25503
-0.02179	-0.06383		0.2685	0.59685		0.26684	0.25288
-0.03192	-0.0928		0.26252	0.59232		0.26684	0.25108
-0.03209	-0.09352		0.26166	0.58913		0.26004	0.24893
-0.03225	-0.09416		0.25553	0.58503		0.26004	0.24718
-0.03225	-0.09459		0.25518	0.57995		0.2534	0.24555
-0.03225	-0.09487		0.24864	0.57487		0.2534	0.24336
-0.04154	-0.12325		0.24864	0.56998		0.24659	0.24152
-0.04168	-0.12382		0.24194	0.5649		0.24143	0.2397
-0.04181	-0.12434		0.24194	0.55956		0.23991	0.23746
-0.04195	-0.12486		0.23503	0.55457		0.2344	0.23509
-0.04092	-0.12521		0.23503	0.55041		0.23315	0.23316
-0.05167	-0.1544		0.22811	0.54497		0.22733	0.23106
-0.05227	-0.1551		0.22811	0.53893		0.22647	0.22874
-0.05242	-0.15559		0.22134	0.53404		0.22031	0.2266
-0.05257	-0.15593		0.22134	0.52793		0.21967	0.22466
-0.05272	-0.15638		0.21459	0.52187		0.21327	0.2225
-0.06227	-0.18443		0.21459	0.5169		0.21296	0.22018
-0.06227	-0.18498		0.20778	0.51077		0.20624	0.2179
-0.0625	-0.18547		0.20778	0.50396		0.20624	0.21583
-0.06256	-0.18592		0.20095	0.49753		0.19944	0.21357
-0.06262	-0.18628		0.19568	0.49205		0.19944	0.2109
-0.07236	-0.21273		0.19408	0.48753		0.19243	0.2086
-0.07236	-0.21346		0.18857	0.48176		0.19243	0.20628
-0.07236	-0.21406		0.18732	0.47542		0.18575	0.20381
-0.07236	-0.2145		0.18158	0.46927		0.18575	0.20164
-0.07274	-0.21476		0.18068	0.46309		0.17893	0.19868
-0.08219	-0.24093		0.17458	0.45562		0.17893	0.19568
-0.08234	-0.24149		0.1738	0.4487		0.17239	0.19346
-0.08234	-0.2419		0.16753	0.44303		0.17239	0.19109
-0.08234	-0.24224		0.16719	0.43681		0.16553	0.18854
-0.08234	-0.24245		0.16055	0.42908		0.16049	0.18573
-0.09259	-0.26818		0.16031	0.4215		0.15888	0.18246
-0.09271	-0.26876		0.15371	0.41452		0.15346	0.17942
-0.09284	-0.26918		0.15372	0.40744		0.15228	0.17674
-0.09284	-0.26949		0.14707	0.40005		0.14645	0.17366
-0.09284	-0.26968		0.14707	0.39326		0.14569	0.17052
-0.10182	-0.29404		0.14017	0.3868		0.13941	0.16753
-0.10248	-0.29467		0.14017	0.37876		0.13877	0.16451
-0.10263	-0.29519		0.13358	0.371		0.13237	0.16139
-0.10278	-0.29559		0.13358	0.36283		0.13191	0.15812
-0.10182	-0.29579		0.12682	0.35456		0.12528	0.15483
-0.10301	-0.29716		0.12682	0.34677		0.12499	0.15141
-0.10301	-0.2972		0.12008	0.33859		0.11823	0.14795
-0.10287	-0.29722		0.11475	0.32977		0.1181	0.14457
-0.10284	-0.29723		0.11338	0.32112		0.11136	0.14143
-0.1028	-0.29739		0.10771	0.31353		0.11136	0.13804
-0.1319	-0.36622		0.10659	0.3056		0.1047	0.13429
-0.13207	-0.36731		0.1006	0.2972		0.1047	0.13064
-0.13224	-0.36813		0.09993	0.28869		0.09778	0.12739
-0.1324	-0.36882		0.09355	0.27928		0.09778	0.12404
-0.13119	-0.36934		0.09321	0.27006		0.09108	0.12047
-0.1616	-0.43356		0.08649	0.26083		0.09108	0.11663
-0.16198	-0.43412		0.08639	0.25159		0.08445	0.11255
-0.16207	-0.43462		0.07973	0.24307		0.07939	0.10871
-0.16207	-0.43514		0.07973	0.234		0.07785	0.10472
-0.16207	-0.43534		0.0731	0.22436		0.07238	0.10061
-0.19137	-0.49103		0.0731	0.21462		0.07115	0.0965
-0.19137	-0.49214		0.06645	0.20493		0.06535	0.09241
-0.19137	-0.49309		0.06645	0.19571		0.06437	0.08852
-0.19137	-0.49376		0.05966	0.1863		0.05838	0.08426
-0.19184	-0.49415		0.05966	0.17629		0.05768	0.07999
-0.22111	-0.54521		0.05291	0.16612		0.05136	0.07572
-0.22111	-0.54595		0.04784	0.15625		0.05082	0.0714
-0.22142	-0.54638		0.04624	0.14634		0.04414	0.06718
-0.22149	-0.54678		0.04074	0.13594		0.04374	0.06259
-0.22157	-0.54695		0.03956	0.12546		0.03718	0.05784
-0.24988	-0.59139		0.03376	0.11525		0.03718	0.05355
-0.25072	-0.59214		0.03268	0.10525		0.03071	0.04894
-0.25092	-0.59282		0.02697	0.09522		0.03071	0.04424
-0.25113	-0.59345		0.02623	0.08502		0.02405	0.03965
-0.25133	-0.59393		0.02014	0.07478		0.02405	0.03483
-0.28047	-0.6345		0.01983	0.06462		0.01747	0.03008
-0.28076	-0.63491		0.01327	0.05428		0.01747	0.02528
-0.28105	-0.63538		0.01327	0.04385		0.01101	0.02036
-0.28112	-0.63581		0.00685	0.03348		0.01101	0.01522
-0.28112	-0.63606		0.00685	0.01975		0.0036	0.00838
-0.31046	-0.6669		-0.00529	0.00133		-0.00436	-0.00143
-0.31071	-0.66932		-0.00529	-0.0131		-0.0069	-0.00879
-0.31071	-0.67099		-0.00924	-0.02086		-0.01024	-0.01289
-0.31071	-0.67185		-0.00924	-0.028		-0.01098	-0.01661
-0.31071	-0.67236		-0.01444	-0.03598		-0.0158	-0.0206
-0.34037	-0.70465		-0.01444	-0.04483		-0.01671	-0.02484
-0.34037	-0.70457		-0.02071	-0.05425		-0.02224	-0.02935
-0.34037	-0.70478		-0.02071	-0.06416		-0.02318	-0.03422
-0.34037	-0.70503		-0.02719	-0.07439		-0.02899	-0.03922
-0.34071	-0.70523		-0.03244	-0.0849		-0.02975	-0.04365
-0.36927	-0.73404		-0.03367	-0.09511		-0.03584	-0.04804
-0.36927	-0.73446		-0.03932	-0.10493		-0.0364	-0.05277
-0.36999	-0.73481		-0.04009	-0.11489		-0.04287	-0.05742
-0.37014	-0.73498		-0.04661	-0.12541		-0.04331	-0.06227
-0.37029	-0.73529		-0.04697	-0.13606		-0.05027	-0.06699
-0.39794	-0.75922		-0.05398	-0.14684		-0.05066	-0.07161
-0.39895	-0.76003		-0.05408	-0.15755		-0.0575	-0.07649
-0.39916	-0.7608		-0.06126	-0.16807		-0.0575	-0.08112
-0.39938	-0.76142		-0.06128	-0.17824		-0.06427	-0.08561
-0.39794	-0.7616		-0.06823	-0.1882		-0.06427	-0.0898
-0.42878	-0.78617		-0.06823	-0.19792		-0.07087	-0.09397
-0.42901	-0.78632		-0.07523	-0.20752		-0.07087	-0.09798
-0.42925	-0.78649		-0.07523	-0.21709		-0.07752	-0.10168
-0.42925	-0.78648		-0.08187	-0.22697		-0.07752	-0.10569
-0.42925	-0.78642		-0.08187	-0.23638		-0.08424	-0.10991
-0.45906	-0.80765		-0.0888	-0.24585		-0.0895	-0.11406
-0.45918	-0.80815		-0.0888	-0.25507		-0.09113	-0.118
-0.45918	-0.80841		-0.09544	-0.26357		-0.09652	-0.12193
-0.45918	-0.80832		-0.09544	-0.27268		-0.0978	-0.12564
-0.45918	-0.80816		-0.10215	-0.28173		-0.10354	-0.12917
-0.48856	-0.82681		-0.1071	-0.28998		-0.10455	-0.13273
-0.48856	-0.82701		-0.10872	-0.29847		-0.11057	-0.13647
-0.48856	-0.82715		-0.11412	-0.3075		-0.11125	-0.14008
-0.48919	-0.82747		-0.11558	-0.31656		-0.11761	-0.14377
-0.48932	-0.82732		-0.12114	-0.32487		-0.1178	-0.14704
-0.51758	-0.84519		-0.12221	-0.3326		-0.12441	-0.15014
-0.51758	-0.84554		-0.12811	-0.34059		-0.12441	-0.15362
-0.51859	-0.84567		-0.12876	-0.3492		-0.13105	-0.15677
-0.5188	-0.84554		-0.13508	-0.35711		-0.13105	-0.15985
-0.51902	-0.84554		-0.13538	-0.36454		-0.13759	-0.1632
-0.54817	-0.86086		-0.1421	-0.37254		-0.13759	-0.16644
-0.54842	-0.86111		-0.1421	-0.37989		-0.14416	-0.16962
-0.54867	-0.86163		-0.14863	-0.38725		-0.14416	-0.17266
-0.54892	-0.86224		-0.14863	-0.39496		-0.15097	-0.17584
-0.54709	-0.86248		-0.15526	-0.40264		-0.15097	-0.17901
-0.57824	-0.87537		-0.15526	-0.4096		-0.15766	-0.18178
-0.57868	-0.87517		-0.1617	-0.41631		-0.16289	-0.18463
-0.57891	-0.87489		-0.1617	-0.42335		-0.16414	-0.18742
-0.57891	-0.87532		-0.1681	-0.43034		-0.16984	-0.18996
-0.57891	-0.87565		-0.17336	-0.43729		-0.17084	-0.19312
-0.60843	-0.88938		-0.1747	-0.44381		-0.17675	-0.19636
-0.60843	-0.88945		-0.1803	-0.45072		-0.17745	-0.19923
-0.60843	-0.88943		-0.18134	-0.45765		-0.1837	-0.20175
-0.60843	-0.88948		-0.18723	-0.46375		-0.18409	-0.20411
-0.60884	-0.8896		-0.18806	-0.46963		-0.19061	-0.20635
-0.63784	-0.90191		-0.19419	-0.47646		-0.19072	-0.20865
-0.63784	-0.90203		-0.19477	-0.48327		-0.19758	-0.21077
-0.63853	-0.90223		-0.20117	-0.48912		-0.19758	-0.21313
-0.6387	-0.90221		-0.20141	-0.49428		-0.20445	-0.21609
-0.63886	-0.90223		-0.20781	-0.50022		-0.20445	-0.21868
-0.66771	-0.91212		-0.20781	-0.50664		-0.21124	-0.22085
-0.66865	-0.91219		-0.21435	-0.5114		-0.21124	-0.22315
-0.66883	-0.91245		-0.21435	-0.51591		-0.21785	-0.22505
-0.66901	-0.9128		-0.22087	-0.52193		-0.21785	-0.22812
-0.66771	-0.91314		-0.22087	-0.52945		-0.22466	-0.23098
-0.69888	-0.92399		-0.22726	-0.53533		-0.22466	-0.23258
-0.69933	-0.92416		-0.23252	-0.54015		-0.2314	-0.2344
-0.69953	-0.92414		-0.23401	-0.54547		-0.2314	-0.23603
-0.69953	-0.92428		-0.23941	-0.55092		-0.23788	-0.23764
-0.69953	-0.92453		-0.24076	-0.55577		-0.24284	-0.23963
-0.72905	-0.9371		-0.24636	-0.56087		-0.24443	-0.24169
-0.72905	-0.93626		-0.24758	-0.56588		-0.24976	-0.24395
-0.72905	-0.93604		-0.25331	-0.57123		-0.25087	-0.24658
-0.72905	-0.93594		-0.25414	-0.57668		-0.25671	-0.24824
-0.72958	-0.93566		-0.26024	-0.58143		-0.2575	-0.25025
-0.75898	-0.94315		-0.26078	-0.58637		-0.26364	-0.25223
-0.75898	-0.94311		-0.26713	-0.59077		-0.26414	-0.25457
-0.75962	-0.94304		-0.26739	-0.59488		-0.27054	-0.25646
-0.75976	-0.94316		-0.27391	-0.59876		-0.27092	-0.25786
-0.7599	-0.94324		-0.27391	-0.60197		-0.27745	-0.25998
-0.78822	-0.95217		-0.28059	-0.6069		-0.27759	-0.2621
-0.78822	-0.95234		-0.28059	-0.61282		-0.28425	-0.26306
-0.78822	-0.95244		-0.28725	-0.61764		-0.28425	-0.26434
-0.78951	-0.95263		-0.28725	-0.62193		-0.291	-0.26594
-0.78977	-0.9527		-0.29394	-0.62458		-0.291	-0.26762
-0.81843	-0.96047		-0.29394	-0.6286		-0.29748	-0.26961
-0.8196	-0.96056		-0.30078	-0.63273		-0.29748	-0.27189
-0.81984	-0.96079		-0.30078	-0.63615		-0.30403	-0.27402
-0.82009	-0.96111		-0.30756	-0.64099		-0.30403	-0.27584
-0.81843	-0.96137		-0.30756	-0.64477		-0.31061	-0.27693
-0.84929	-0.96669		-0.31439	-0.64873		-0.31567	-0.27787
-0.84962	-0.96676		-0.31439	-0.65283		-0.31717	-0.27959
-0.84982	-0.96677		-0.32096	-0.65643		-0.32261	-0.28131
-0.84982	-0.9668		-0.3261	-0.65972		-0.32403	-0.2829
-0.84982	-0.9669		-0.32739	-0.66235		-0.32952	-0.28478
-0.87966	-0.97502		-0.33304	-0.66682		-0.33078	-0.2859
-0.87966	-0.97506		-0.33406	-0.67055		-0.33644	-0.28609
-0.87966	-0.97505		-0.34001	-0.67329		-0.33734	-0.28699
-0.87966	-0.97516		-0.34056	-0.67752		-0.3434	-0.28855
-0.87973	-0.97552		-0.3469	-0.68151		-0.34396	-0.28996
-0.90834	-0.98227		-0.34711	-0.68549		-0.35032	-0.29105
-0.90834	-0.98237		-0.3537	-0.68658		-0.35042	-0.29241
-0.90903	-0.98264		-0.3537	-0.68825		-0.35696	-0.29417
-0.90918	-0.98292		-0.36052	-0.69205		-0.35696	-0.29609
-0.90934	-0.98314		-0.36052	-0.6948		-0.36377	-0.29744
-0.93808	-0.98884		-0.3673	-0.69954		-0.36377	-0.29862
-0.93835	-0.98915		-0.3673	-0.70476		-0.37047	-0.29967
-0.93862	-0.98929		-0.37411	-0.70705		-0.37047	-0.30054
-0.93889	-0.9894		-0.37411	-0.70853		-0.37707	-0.30119
-0.93686	-0.98947		-0.38074	-0.70955		-0.37707	-0.30172
-0.96726	-0.99516		-0.38074	-0.7127		-0.38366	-0.30269
-0.96771	-0.99533		-0.38733	-0.71713		-0.38366	-0.30412
-0.96783	-0.99539		-0.38733	-0.71896		-0.3903	-0.30554
-0.96783	-0.99549		-0.39376	-0.72001		-0.3903	-0.30676
-0.96783	-0.99567		-0.39886	-0.72357		-0.397	-0.30806
-0.99573	-1.00042		-0.40021	-0.72796		-0.40226	-0.30845
-0.99573	-1.00049		-0.40581	-0.7318		-0.40373	-0.30948
-0.99573	-1.00057		-0.40684	-0.73499		-0.40919	-0.31047
-0.99604	-1.00076		-0.41275	-0.73732		-0.41038	-0.31143
-0.99611	-1.00084		-0.41334	-0.73933		-0.41614	-0.31275
-0.96868	-0.9959		-0.41971	-0.74135		-0.41695	-0.31385
-0.96818	-0.99581		-0.42012	-0.74373		-0.42314	-0.31484
-0.96806	-0.99557		-0.42665	-0.74519		-0.42374	-0.31548
-0.96794	-0.99536		-0.42671	-0.74791		-0.43009	-0.31681
-0.96782	-0.99529		-0.43341	-0.7513		-0.43027	-0.31842
-0.93889	-0.98981		-0.43341	-0.75451		-0.43695	-0.31953
-0.93876	-0.98959		-0.43991	-0.7565		-0.43697	-0.31987
-0.93862	-0.98934		-0.43991	-0.75882		-0.4436	-0.32021
-0.93848	-0.98906		-0.44652	-0.76192		-0.4436	-0.32112
-0.93946	-0.98853		-0.44652	-0.76297		-0.45019	-0.32297
-0.90953	-0.9842		-0.45302	-0.76415		-0.45018	-0.32488
-0.90934	-0.98404		-0.45302	-0.76644		-0.45675	-0.32571
-0.90916	-0.98375		-0.45958	-0.76791		-0.45675	-0.32615
-0.91045	-0.98357		-0.4648	-0.77079		-0.46354	-0.32736
-0.91045	-0.98355		-0.46631	-0.77379		-0.46354	-0.32879
-0.87908	-0.97644		-0.47178	-0.77493		-0.47014	-0.32942
-0.8789	-0.97658		-0.47299	-0.7771		-0.47523	-0.32966
-0.8789	-0.97677		-0.47876	-0.77923		-0.47681	-0.3302
-0.8789	-0.97665		-0.4796	-0.78042		-0.48219	-0.3317
-0.8789	-0.97662		-0.48576	-0.78211		-0.48378	-0.33286
-0.84935	-0.97034		-0.48624	-0.78355		-0.48914	-0.33309
-0.84935	-0.97012		-0.49272	-0.7859		-0.4904	-0.33334
-0.84935	-0.97006		-0.49285	-0.78909		-0.49613	-0.33378
-0.84913	-0.97022		-0.49941	-0.79014		-0.49728	-0.33476
-0.84907	-0.96995		-0.49941	-0.79042		-0.50316	-0.33551
-0.81946	-0.96268		-0.50608	-0.79319		-0.504	-0.33659
-0.81946	-0.96252		-0.50608	-0.79615		-0.51013	-0.33773
-0.81898	-0.96221		-0.51262	-0.79721		-0.51074	-0.33904
-0.81888	-0.96191		-0.51262	-0.79838		-0.51704	-0.34028
-0.81877	-0.96144		-0.51946	-0.80034		-0.51732	-0.34051
-0.78971	-0.95382		-0.51946	-0.80279		-0.52407	-0.34072
-0.789	-0.95388		-0.52618	-0.80493		-0.52416	-0.34148
-0.78883	-0.9539		-0.52618	-0.80745		-0.5307	-0.34193
-0.78867	-0.95377		-0.53288	-0.80672		-0.5307	-0.34209
-0.78851	-0.95368		-0.53288	-0.80606		-0.53747	-0.34227
-0.75895	-0.94445		-0.5398	-0.81019		-0.53747	-0.34264
-0.75872	-0.94416		-0.5398	-0.81255		-0.54409	-0.34311
-0.75849	-0.94408		-0.5467	-0.81426		-0.54409	-0.34339
-0.75847	-0.94405		-0.55205	-0.81621		-0.55078	-0.34344
-0.75847	-0.94406		-0.55335	-0.81816		-0.55078	-0.34417
-0.72872	-0.934		-0.55912	-0.8189		-0.5575	-0.3456
-0.72832	-0.93388		-0.56034	-0.81938		-0.5575	-0.34661
-0.7283	-0.93382		-0.56613	-0.82141		-0.56424	-0.3476
-0.7283	-0.93375		-0.56702	-0.8212		-0.56958	-0.34764
-0.7283	-0.93356		-0.57318	-0.82107		-0.57088	-0.34738
-0.69826	-0.92419		-0.57385	-0.82515		-0.57661	-0.34811
-0.69826	-0.92412		-0.5802	-0.82697		-0.57748	-0.34985
-0.69826	-0.92392		-0.58061	-0.82791		-0.58365	-0.3514
-0.69826	-0.92375		-0.58728	-0.83027		-0.58413	-0.35123
-0.69796	-0.92373		-0.58733	-0.83043		-0.59068	-0.3509
-0.66836	-0.91355		-0.59401	-0.82939		-0.59092	-0.35158
-0.66836	-0.9132		-0.59401	-0.83209		-0.59752	-0.35128
-0.66836	-0.91323		-0.60087	-0.8353		-0.59752	-0.3502
-0.66794	-0.91343		-0.60087	-0.83522		-0.60444	-0.35014
-0.66783	-0.91326		-0.6076	-0.83653		-0.60444	-0.35085
-0.6385	-0.90359		-0.6076	-0.83824		-0.6111	-0.35111
-0.63772	-0.90336		-0.6144	-0.83772		-0.6111	-0.35165
-0.63754	-0.90306		-0.6144	-0.83796		-0.61786	-0.35246
-0.63736	-0.90283		-0.62108	-0.84135		-0.61786	-0.35313
-0.63718	-0.90281		-0.62108	-0.84266		-0.62458	-0.35386
-0.60797	-0.8913		-0.6281	-0.84255		-0.62459	-0.35425
-0.60775	-0.89096		-0.6281	-0.84483		-0.63144	-0.35483
-0.60753	-0.89079		-0.63471	-0.84946		-0.63144	-0.35522
-0.6073	-0.89062		-0.63471	-0.85131		-0.63836	-0.35522
-0.60895	-0.89037		-0.64159	-0.84896		-0.63836	-0.35501
-0.57767	-0.8784		-0.64701	-0.84655		-0.64507	-0.35501
-0.5773	-0.87823		-0.64853	-0.8473		-0.65053	-0.35533
-0.57701	-0.87804		-0.65411	-0.84924		-0.65192	-0.35596
-0.57701	-0.87799		-0.65526	-0.85126		-0.65759	-0.35665
-0.57701	-0.87782		-0.66117	-0.85243		-0.65855	-0.35782
-0.54743	-0.86329		-0.6619	-0.85391		-0.66456	-0.35892
-0.54708	-0.86323		-0.66821	-0.85386		-0.66511	-0.35964
-0.54708	-0.86311		-0.66866	-0.85381		-0.67168	-0.36103
-0.54708	-0.86301		-0.67531	-0.8561		-0.67198	-0.36151
-0.54708	-0.86295		-0.67536	-0.8566		-0.67876	-0.3615
-0.5173	-0.84753		-0.68206	-0.85706		-0.67881	-0.36258
-0.5173	-0.84723		-0.68206	-0.85984		-0.68558	-0.36292
-0.5173	-0.84703		-0.68902	-0.8609		-0.68558	-0.36206
-0.5173	-0.84671		-0.68902	-0.8631		-0.69228	-0.36221
-0.51699	-0.84664		-0.69602	-0.86377		-0.69228	-0.3631
-0.48807	-0.82936		-0.69602	-0.86334		-0.69894	-0.36391
-0.48807	-0.82905		-0.70271	-0.86391		-0.69894	-0.36444
-0.48765	-0.82874		-0.70271	-0.8653		-0.70566	-0.36475
-0.48755	-0.82839		-0.70948	-0.86514		-0.70566	-0.36471
-0.48745	-0.82832		-0.70948	-0.86707		-0.71239	-0.3652
-0.45786	-0.80893		-0.71618	-0.86865		-0.71752	-0.36653
-0.45773	-0.80869		-0.71618	-0.86659		-0.71909	-0.36646
-0.4576	-0.80864		-0.72318	-0.86572		-0.72463	-0.36681
-0.45747	-0.80858		-0.72318	-0.86887		-0.72577	-0.36762
-0.45843	-0.80841		-0.72984	-0.87133		-0.7316	-0.36792
-0.42822	-0.78758		-0.73523	-0.87212		-0.7324	-0.36852
-0.42788	-0.78714		-0.73651	-0.87357		-0.73868	-0.36903
-0.42755	-0.78693		-0.74231	-0.87463		-0.7392	-0.3689
-0.42751	-0.78665		-0.74332	-0.87552		-0.74579	-0.36834
-0.42751	-0.7866		-0.74938	-0.87597		-0.74604	-0.36766
-0.39841	-0.76324		-0.74984	-0.87649		-0.75282	-0.36765
-0.39804	-0.76251		-0.75652	-0.87635		-0.75282	-0.36812
-0.39804	-0.76207		-0.75656	-0.87451		-0.75963	-0.36796
-0.39804	-0.76183		-0.76345	-0.87486		-0.75963	-0.36762
-0.39804	-0.76161		-0.76345	-0.87677		-0.76648	-0.3685
-0.36811	-0.73662		-0.77046	-0.8774		-0.76648	-0.36955
-0.36798	-0.73614		-0.77046	-0.87578		-0.77336	-0.37047
-0.36798	-0.73585		-0.77728	-0.87617		-0.77336	-0.3707
-0.36798	-0.73569		-0.77728	-0.87767		-0.78023	-0.37112
-0.36798	-0.73538		-0.784	-0.88018		-0.78023	-0.37232
-0.33881	-0.70708		-0.784	-0.88082		-0.78731	-0.37265
-0.33881	-0.70638		-0.79067	-0.88047		-0.78731	-0.37147
-0.33881	-0.70592		-0.79067	-0.87797		-0.79388	-0.36965
-0.33881	-0.70566		-0.79731	-0.8773		-0.79388	-0.36905
-0.33832	-0.70537		-0.80244	-0.87964		-0.8008	-0.36982
-0.30904	-0.67344		-0.80384	-0.87959		-0.8008	-0.3706
-0.30904	-0.67279		-0.80944	-0.8794		-0.80748	-0.37094
-0.30904	-0.67225		-0.81043	-0.88087		-0.81283	-0.37141
-0.30858	-0.67178		-0.81646	-0.88117		-0.81426	-0.37199
-0.30848	-0.6715		-0.81725	-0.88072		-0.81981	-0.37163
-0.27938	-0.6348		-0.82348	-0.88165		-0.82088	-0.37095
-0.27865	-0.63426		-0.82416	-0.88134		-0.82691	-0.37133
-0.27851	-0.63392		-0.83057	-0.88295		-0.82758	-0.37199
-0.27836	-0.63371		-0.8311	-0.88429		-0.83396	-0.37233
-0.27938	-0.6334		-0.83758	-0.88369		-0.83456	-0.37273
-0.24941	-0.59319		-0.83783	-0.88549		-0.84095	-0.37286
-0.24919	-0.59235		-0.8446	-0.88606		-0.84139	-0.3709
-0.24896	-0.59175		-0.84466	-0.88345		-0.84805	-0.3689
-0.2505	-0.59119		-0.85139	-0.88327		-0.84818	-0.36819
-0.2505	-0.59082		-0.85139	-0.88453		-0.85476	-0.36779
-0.2195	-0.54603		-0.85797	-0.88534		-0.85476	-0.36783
-0.21911	-0.54496		-0.85797	-0.88377		-0.8617	-0.36922
-0.21887	-0.54434		-0.86452	-0.88732		-0.8617	-0.36918
-0.21887	-0.54386		-0.86452	-0.8928		-0.8686	-0.36872
-0.21887	-0.54372		-0.8713	-0.89408		-0.8686	-0.36894
-0.18926	-0.49269		-0.8713	-0.8888		-0.87529	-0.36901
-0.18884	-0.49163		-0.87818	-0.88614		-0.87529	-0.36842
-0.18884	-0.49085		-0.87817	-0.8861		-0.88197	-0.36785
-0.18884	-0.49035		-0.88488	-0.88949		-0.88197	-0.36687
-0.18884	-0.49005		-0.89003	-0.89447		-0.88865	-0.36669
-0.15932	-0.43287		-0.89137	-0.89155		-0.88865	-0.36765
-0.15923	-0.43156		-0.89695	-0.89153		-0.89525	-0.36816
-0.15923	-0.43069		-0.898	-0.89406		-0.90028	-0.36771
-0.15923	-0.43009		-0.90378	-0.89143		-0.90184	-0.36677
-0.15923	-0.42962		-0.90456	-0.88743		-0.90719	-0.36726
-0.12959	-0.3657		-0.91073	-0.88822		-0.90848	-0.36853
-0.12959	-0.36434		-0.91113	-0.89244		-0.914	-0.36729
-0.12959	-0.3632		-0.91762	-0.89585		-0.91507	-0.3663
-0.12959	-0.36242		-0.91776	-0.89478		-0.92094	-0.36622
-0.12907	-0.36197		-0.92437	-0.8931		-0.92159	-0.36535
-0.09956	-0.29017		-0.92437	-0.89275		-0.92783	-0.36457
-0.09956	-0.28903		-0.93097	-0.89266		-0.92809	-0.36527
-0.099	-0.28813		-0.93097	-0.8954		-0.93467	-0.36605
-0.09887	-0.2874		-0.93756	-0.89358		-0.93466	-0.36594
-0.09874	-0.28685		-0.93757	-0.89284		-0.94125	-0.3657
-0.08912	-0.26119		-0.94413	-0.89594		-0.94125	-0.36621
-0.08911	-0.26049		-0.94413	-0.89473		-0.94764	-0.36701
-0.08911	-0.26003		-0.95068	-0.8918		-0.94763	-0.36733
-0.08911	-0.25969		-0.95068	-0.88989		-0.95442	-0.36683
-0.08911	-0.25947		-0.95716	-0.89174		-0.95442	-0.36615
-0.07903	-0.23347		-0.96209	-0.89707		-0.96105	-0.36474
-0.0789	-0.23288		-0.96362	-0.89894		-0.96105	-0.36323
-0.07877	-0.23247		-0.96887	-0.89836		-0.96745	-0.36283
-0.07874	-0.23212		-0.97007	-0.89794		-0.96745	-0.36213
-0.07874	-0.23175		-0.97561	-0.89665		-0.97378	-0.36176
-0.06891	-0.20521		-0.9764	-0.89684		-0.97878	-0.36248
-0.06884	-0.20463		-0.98231	-0.89637		-0.98021	-0.36345
-0.06876	-0.20413		-0.98254	-0.89565		-0.98551	-0.36456
-0.06869	-0.2038		-0.9889	-0.8939		-0.98644	-0.36431
-0.06922	-0.20354		-0.9889	-0.89642		-0.99211	-0.36507
-0.05897	-0.17629		-0.99502	-0.90066		-0.99256	-0.36624
-0.05897	-0.17576		-0.99503	-0.89965		-1.00037	-0.36606
-0.05885	-0.17533		-1.00217	-0.89775		-1.00049	-0.36627
-0.05883	-0.17508		-1.00217	-0.89876		-1.00284	-0.36651
-0.05881	-0.1749		-1.00312	-0.89958		-1.00284	-0.36626
-0.04873	-0.14746		-1.00312	-0.89513		-1.00187	-0.36742
-0.04873	-0.14683		-1.00144	-0.89107		-1.00186	-0.36775
-0.04873	-0.1463		-1.00144	-0.89357		-0.9972	-0.36636
-0.04873	-0.1459		-0.99608	-0.89595		-0.9972	-0.36297
-0.04874	-0.14556		-0.99608	-0.89501		-0.99121	-0.35974
-0.03862	-0.11631		-0.99001	-0.89539		-0.99121	-0.36058
-0.03858	-0.11563		-0.985	-0.89595		-0.98494	-0.36185
-0.03858	-0.11501		-0.98376	-0.89178		-0.98494	-0.36131
-0.03858	-0.1145		-0.97824	-0.8915		-0.97846	-0.36114
-0.03858	-0.11417		-0.97721	-0.89314		-0.97846	-0.36062
-0.02909	-0.08663		-0.97148	-0.89163		-0.97196	-0.35954
-0.02895	-0.08597		-0.97053	-0.89103		-0.96687	-0.35899
-0.02886	-0.08554		-0.96466	-0.8901		-0.96554	-0.35753
-0.02886	-0.0851		-0.96407	-0.88857		-0.96004	-0.35555
-0.02886	-0.08486		-0.9578	-0.89367		-0.9591	-0.35344
-0.01906	-0.05585		-0.95755	-0.89698		-0.95319	-0.35056
-0.01894	-0.05519		-0.95102	-0.89627		-0.95234	-0.34978
-0.01882	-0.05464		-0.95102	-0.89334		-0.94626	-0.35143
-0.01961	-0.05424		-0.94425	-0.89224		-0.94558	-0.35265
-0.01961	-0.05393		-0.94424	-0.88969		-0.93942	-0.35468
-0.00914	-0.02541		-0.9376	-0.8908		-0.939	-0.35453
-0.00904	-0.02476		-0.9376	-0.8935		-0.93248	-0.35298
-0.00895	-0.02419		-0.93111	-0.89334		-0.93246	-0.35205
-0.00963	-0.02355		-0.93111	-0.89129		-0.92567	-0.3514
-0.00963	-0.02319		-0.92465	-0.88987		-0.92567	-0.35309
0.000166483	0.00407		-0.92465	-0.88959		-0.91889	-0.35606
0.000709404	0.00486		-0.91782	-0.88897		-0.91889	-0.35795
0.000823703	0.00544		-0.91782	-0.89085		-0.91254	-0.35989
0.000938003	0.00608		-0.91121	-0.88975		-0.91254	-0.36101
0.000166483	0.00661		-0.90601	-0.88766		-0.90603	-0.36156
0.01117	0.03776		-0.90447	-0.8851		-0.90603	-0.36321
0.01135	0.03841		-0.89905	-0.88381		-0.89963	-0.36409
0.01135	0.03891		-0.89758	-0.8873		-0.89433	-0.36387
0.01135	0.0394		-0.8921	-0.89062		-0.89297	-0.36352
0.01135	0.03978		-0.89078	-0.88812		-0.88741	-0.36358
0.02098	0.06858		-0.88513	-0.8838		-0.88622	-0.36396
0.02107	0.06943		-0.88421	-0.88314		-0.88039	-0.36427
0.02107	0.07005		-0.87814	-0.8836		-0.87924	-0.36458
0.02107	0.07052		-0.87763	-0.88431		-0.87341	-0.36519
0.02107	0.07075		-0.8712	-0.88415		-0.87234	-0.36641
0.0313	0.0995		-0.87094	-0.8814		-0.86635	-0.36775
0.03143	0.1002		-0.86416	-0.88052		-0.86534	-0.36849
0.03143	0.10078		-0.86416	-0.88107		-0.85938	-0.36897
0.03143	0.10131		-0.85738	-0.88377		-0.85873	-0.36933
0.03143	0.10166		-0.85738	-0.88365		-0.85237	-0.37027
0.04101	0.12978		-0.85062	-0.88144		-0.85217	-0.3712
0.04118	0.13058		-0.85062	-0.87753		-0.84535	-0.37131
0.04118	0.13115		-0.84389	-0.87713		-0.84535	-0.37062
0.04118	0.13154		-0.8439	-0.87981		-0.83872	-0.36966
0.04118	0.13172		-0.83727	-0.87803		-0.83872	-0.3697
0.05142	0.1602		-0.83727	-0.87659		-0.83212	-0.36914
0.05156	0.16102		-0.8304	-0.87563		-0.83213	-0.36801
0.0517	0.16166		-0.8304	-0.87769		-0.8253	-0.36691
0.05183	0.1622		-0.82368	-0.87858		-0.8253	-0.36583
0.05134	0.1627		-0.81836	-0.87513		-0.81846	-0.36512
0.06162	0.191		-0.8169	-0.87433		-0.81847	-0.36568
0.0618	0.19162		-0.81134	-0.87476		-0.81152	-0.36537
0.06184	0.19205		-0.81027	-0.87357		-0.81152	-0.36432
0.06188	0.19241		-0.80431	-0.87194		-0.80479	-0.36415
0.06192	0.19268		-0.80334	-0.8724		-0.80479	-0.36358
0.07182	0.21934		-0.79731	-0.87421		-0.79788	-0.36315
0.07182	0.21981		-0.79657	-0.87644		-0.79255	-0.3647
0.07211	0.2203		-0.79028	-0.8768		-0.79125	-0.36613
0.07217	0.2207		-0.78989	-0.87295		-0.78549	-0.36342
0.07224	0.22102		-0.7832	-0.87178		-0.78456	-0.36004
0.08177	0.2468		-0.78309	-0.87336		-0.77838	-0.35951
0.08177	0.24743		-0.77611	-0.87483		-0.7776	-0.35943
0.08177	0.24798		-0.77611	-0.87651		-0.77126	-0.35823
0.08177	0.24836		-0.76934	-0.87332		-0.77088	-0.35927
0.08206	0.2486		-0.76934	-0.86806		-0.76418	-0.3607
0.09157	0.27381		-0.76239	-0.86724		-0.76393	-0.36108
0.09177	0.27444		-0.76239	-0.86898		-0.75731	-0.36206
0.09182	0.27492		-0.75573	-0.87093		-0.75731	-0.36166
0.09182	0.27533		-0.75573	-0.87097		-0.75035	-0.36044
0.09182	0.27556		-0.74896	-0.86706		-0.75035	-0.35996
0.10174	0.2999		-0.74896	-0.86345		-0.74353	-0.35926
0.10183	0.30054		-0.7423	-0.86157		-0.74353	-0.35749
0.10193	0.30103		-0.7423	-0.86432		-0.73682	-0.35628
0.10202	0.30143		-0.73551	-0.86749		-0.73682	-0.35647
0.10135	0.30176		-0.7301	-0.86667		-0.73004	-0.35657
0.1022	0.30278		-0.72861	-0.86364		-0.73004	-0.35711
0.1022	0.30266		-0.72304	-0.86278		-0.72339	-0.35803
0.10219	0.30263		-0.72164	-0.86177		-0.71827	-0.35842
0.10218	0.30273		-0.71599	-0.86268		-0.71669	-0.35801
0.10218	0.30274		-0.71498	-0.86335		-0.7112	-0.35689
0.1303	0.37012		-0.70896	-0.86104		-0.70991	-0.35609
0.13149	0.37144		-0.70816	-0.86021		-0.70416	-0.35612
0.13174	0.37249		-0.70191	-0.85732		-0.70313	-0.35534
0.13199	0.37327		-0.70142	-0.85676		-0.69712	-0.35418
0.1303	0.37385		-0.69487	-0.85672		-0.69634	-0.35372
0.16095	0.4348		-0.69459	-0.85599		-0.69008	-0.35328
0.16128	0.43692		-0.6879	-0.85379		-0.68962	-0.35347
0.16158	0.43824		-0.6879	-0.85394		-0.68299	-0.35398
0.16158	0.43904		-0.68119	-0.85356		-0.68297	-0.35434
0.16158	0.43954		-0.68119	-0.85373		-0.67621	-0.35424
0.19086	0.49652		-0.67438	-0.85195		-0.67622	-0.35443
0.19086	0.49704		-0.67438	-0.84982		-0.66932	-0.35477
0.19086	0.49754		-0.66766	-0.85089		-0.66932	-0.35445
0.19086	0.49812		-0.66766	-0.85096		-0.66244	-0.35466
0.19126	0.49853		-0.66063	-0.84839		-0.66244	-0.35592
0.22078	0.54976		-0.66063	-0.84754		-0.65573	-0.35762
0.22078	0.55032		-0.65385	-0.84564		-0.65573	-0.35793
0.22135	0.55067		-0.65385	-0.84338		-0.64914	-0.35732
0.22148	0.55087		-0.64724	-0.84421		-0.64914	-0.35646
0.2216	0.55104		-0.64183	-0.8443		-0.6423	-0.35607
0.24992	0.59506		-0.64055	-0.8435		-0.63701	-0.35581
0.25084	0.59604		-0.63477	-0.84184		-0.63562	-0.35535
0.25106	0.59661		-0.63397	-0.83926		-0.63003	-0.35337
0.25128	0.59705		-0.6278	-0.83904		-0.62899	-0.35163
0.2515	0.59732		-0.62728	-0.83843		-0.62298	-0.35135
0.28072	0.63791		-0.62072	-0.83716		-0.62219	-0.35141
0.28104	0.63836		-0.62055	-0.83362		-0.61597	-0.34947
0.28135	0.63866		-0.61371	-0.83117		-0.61552	-0.34826
0.28144	0.63899		-0.61369	-0.8328		-0.60895	-0.34909
0.28144	0.63926		-0.60673	-0.83343		-0.60884	-0.3505
0.31064	0.6756		-0.60673	-0.83099		-0.6021	-0.35082
0.31083	0.67613		-0.60011	-0.82851		-0.6021	-0.35031
0.31083	0.67644		-0.60011	-0.82764		-0.59543	-0.35026
0.31083	0.67656		-0.59344	-0.82802		-0.59543	-0.35085
0.31083	0.67647		-0.59344	-0.82883		-0.58876	-0.35133
0.34088	0.70868		-0.58681	-0.82712		-0.58876	-0.3508
0.34088	0.70908		-0.58681	-0.82405		-0.58177	-0.35024
0.34088	0.70922		-0.58015	-0.82387		-0.58177	-0.34996
0.3411	0.70928		-0.57494	-0.82025		-0.57494	-0.34943
0.34115	0.70914		-0.57353	-0.81637		-0.57494	-0.34902
0.36954	0.73784		-0.56791	-0.81681		-0.56823	-0.34875
0.37057	0.7384		-0.56687	-0.81736		-0.56823	-0.34796
0.37079	0.73886		-0.5609	-0.81753		-0.56146	-0.34768
0.371	0.73912		-0.56014	-0.81562		-0.55611	-0.3472
0.36954	0.73947		-0.55383	-0.81308		-0.55472	-0.34659
0.39953	0.76473		-0.55335	-0.81286		-0.54905	-0.34513
0.39981	0.76486		-0.54683	-0.81148		-0.54806	-0.34263
0.40009	0.76485		-0.54672	-0.80705		-0.54211	-0.34229
0.40017	0.76489		-0.54	-0.8041		-0.5415	-0.34248
0.40017	0.76503		-0.54	-0.80356		-0.53513	-0.3412
0.43015	0.78875		-0.53343	-0.80266		-0.53486	-0.33935
0.43034	0.78911		-0.53343	-0.80236		-0.52819	-0.33904
0.43034	0.7893		-0.52697	-0.80253		-0.52819	-0.33952
0.43034	0.7894		-0.52697	-0.80069		-0.52161	-0.34049
0.43034	0.7893		-0.52033	-0.79834		-0.52161	-0.34099
0.4599	0.81079		-0.51532	-0.79705		-0.5147	-0.34047
0.4599	0.81083		-0.5137	-0.79572		-0.5147	-0.33971
0.4599	0.81089		-0.50832	-0.79591		-0.5079	-0.3399
0.4603	0.8109		-0.50682	-0.79421		-0.5079	-0.33956
0.46039	0.81088		-0.50135	-0.79002		-0.50127	-0.33726
0.48911	0.82935		-0.50025	-0.78757		-0.50127	-0.33611
0.48911	0.82966		-0.49437	-0.78695		-0.49457	-0.3365
0.48985	0.82992		-0.49359	-0.78671		-0.49457	-0.33671
0.49002	0.83022		-0.48735	-0.78441		-0.48784	-0.33597
0.49019	0.83038		-0.48681	-0.78273		-0.48784	-0.3344
0.51977	0.84743		-0.4804	-0.78054		-0.48096	-0.33296
0.51995	0.84757		-0.48003	-0.77677		-0.47561	-0.33234
0.52012	0.84773		-0.47336	-0.77276		-0.47427	-0.33173
0.5203	0.84778		-0.47328	-0.77098		-0.46863	-0.33052
0.51903	0.848		-0.4668	-0.77119		-0.46761	-0.32976
0.5495	0.86318		-0.4668	-0.77185		-0.46164	-0.32905
0.54987	0.86352		-0.46014	-0.76881		-0.46104	-0.32753
0.55005	0.86389		-0.46014	-0.76594		-0.45469	-0.32679
0.55005	0.864		-0.45348	-0.76364		-0.45437	-0.32609
0.55005	0.86388		-0.45348	-0.76005		-0.44765	-0.3249
0.57995	0.87828		-0.44684	-0.75861		-0.44763	-0.32435
0.57995	0.87855		-0.44684	-0.75626		-0.4411	-0.32345
0.57995	0.87898		-0.44026	-0.75357		-0.4411	-0.32207
0.57995	0.87916		-0.43498	-0.75205		-0.43428	-0.32122
0.57999	0.8792		-0.43353	-0.75176		-0.43428	-0.32094
0.60941	0.8918		-0.428	-0.7494		-0.4276	-0.32041
0.60941	0.89278		-0.4269	-0.74626		-0.4276	-0.31988
0.60941	0.8935		-0.42101	-0.74387		-0.42102	-0.31865
0.60987	0.89374		-0.42022	-0.74077		-0.42102	-0.31669
0.60998	0.89376		-0.41405	-0.73783		-0.41448	-0.31534
0.63905	0.90582		-0.41367	-0.73533		-0.41448	-0.31454
0.63965	0.90573		-0.40715	-0.73397		-0.40765	-0.31383
0.6398	0.90552		-0.40715	-0.7296		-0.40239	-0.31398
0.63994	0.90541		-0.40036	-0.72615		-0.40083	-0.31336
0.64009	0.90542		-0.40036	-0.72652		-0.39542	-0.31178
0.66913	0.9177		-0.3938	-0.72542		-0.39396	-0.31006
0.66944	0.91774		-0.3938	-0.72303		-0.38844	-0.30839
0.66975	0.91774		-0.38716	-0.71915		-0.38735	-0.30707
0.66988	0.91754		-0.38716	-0.71413		-0.38147	-0.3055
0.66988	0.91748		-0.38048	-0.71063		-0.38065	-0.30377
0.69955	0.92648		-0.38048	-0.70906		-0.37449	-0.30284
0.69978	0.92625		-0.37381	-0.70732		-0.37406	-0.30211
0.69978	0.92725		-0.37381	-0.70425		-0.36761	-0.30065
0.69978	0.92774		-0.36699	-0.70085		-0.36761	-0.29964
0.69978	0.92762		-0.36174	-0.69734		-0.36096	-0.29804
0.729	0.93741		-0.36016	-0.69409		-0.36095	-0.29694
0.729	0.9375		-0.35481	-0.69157		-0.35438	-0.29575
0.729	0.93762		-0.35371	-0.68862		-0.35438	-0.2938
0.72931	0.93766		-0.34791	-0.68406		-0.34757	-0.29281
0.72939	0.93747		-0.34714	-0.68237		-0.34757	-0.29205
0.75797	0.94374		-0.34093	-0.68104		-0.34079	-0.29052
0.75911	0.94509		-0.34047	-0.6771		-0.34079	-0.28882
0.75936	0.94572		-0.33396	-0.67181		-0.33419	-0.2874
0.75961	0.94607		-0.33367	-0.66816		-0.33419	-0.28684
0.75797	0.94646		-0.32702	-0.66589		-0.32753	-0.28612
0.78869	0.95502		-0.32702	-0.66082		-0.32234	-0.2847
0.78897	0.95476		-0.32043	-0.65673		-0.32084	-0.2825
0.78925	0.95464		-0.32043	-0.65474		-0.31539	-0.28051
0.78927	0.95464		-0.31374	-0.6499		-0.31431	-0.27914
0.78927	0.95459		-0.31374	-0.64551		-0.3084	-0.27746
0.818	0.96281		-0.30715	-0.64219		-0.3077	-0.2759
0.818	0.96309		-0.30715	-0.63909		-0.30144	-0.27451
0.818	0.96329		-0.30065	-0.63643		-0.30107	-0.2735
0.818	0.96326		-0.30065	-0.63184		-0.29444	-0.27221
0.81832	0.96318		-0.29401	-0.62685		-0.29425	-0.27042
0.8472	0.97047		-0.28864	-0.62236		-0.28763	-0.2689
0.8472	0.97038		-0.28735	-0.61753		-0.28763	-0.26721
0.84766	0.97014		-0.28167	-0.61448		-0.28096	-0.26499
0.84777	0.97008		-0.28049	-0.61129		-0.28096	-0.26332
0.84788	0.96986		-0.27469	-0.60613		-0.27441	-0.26147
0.87526	0.97556		-0.27366	-0.60089		-0.27441	-0.25961
0.87526	0.97612		-0.26774	-0.59653		-0.26786	-0.25827
0.87526	0.97638		-0.26714	-0.59237		-0.26786	-0.25656
0.8763	0.97651		-0.2608	-0.58824		-0.26133	-0.25416
0.87654	0.97676		-0.26035	-0.58391		-0.26133	-0.25208
0.90465	0.98344		-0.25386	-0.57893		-0.25445	-0.25058
0.90465	0.98352		-0.25362	-0.57357		-0.24916	-0.24911
0.9055	0.98364		-0.24712	-0.56871		-0.248	-0.24736
0.90567	0.98372		-0.24712	-0.56428		-0.24221	-0.24488
0.90585	0.98395		-0.24047	-0.56026		-0.24131	-0.24277
0.93363	0.98944		-0.24047	-0.55529		-0.23524	-0.24105
0.93394	0.98928		-0.23397	-0.54952		-0.23468	-0.23888
0.93425	0.98931		-0.23397	-0.54489		-0.2282	-0.23655
0.93433	0.98934		-0.22721	-0.53908		-0.22797	-0.23417
0.93433	0.98948		-0.22721	-0.53213		-0.22133	-0.23199
0.96222	0.99613		-0.22058	-0.52706		-0.22133	-0.22921
0.9625	0.99619		-0.21537	-0.52254		-0.21458	-0.22651
0.9625	0.99614		-0.21375	-0.5167		-0.21458	-0.22443
0.9625	0.996		-0.20836	-0.51124		-0.20788	-0.22208
0.9625	0.99562		-0.20713	-0.50531		-0.20788	-0.21956
0.9991	1.00052		-0.20137	-0.49896		-0.20122	-0.21761
0.9991	1.00073		-0.20037	-0.49324		-0.20122	-0.21601
0.9991	1.00091		-0.19436	-0.48656		-0.19467	-0.21357
0.99974	1.00097		-0.19378	-0.4796		-0.18966	-0.21068
0.99988	1.00104		-0.18733	-0.47383		-0.18805	-0.20846
			-0.18699	-0.46844		-0.18264	-0.20604
			-0.18051	-0.46198		-0.18137	-0.20312
			-0.18051	-0.45544		-0.17566	-0.20055
			-0.17405	-0.44954		-0.17482	-0.19787
			-0.17405	-0.44262		-0.16875	-0.19464
			-0.16736	-0.435		-0.16801	-0.1916
			-0.16735	-0.42785		-0.16181	-0.18923
			-0.16068	-0.42093		-0.16142	-0.18725
			-0.16068	-0.41385		-0.15478	-0.18441
			-0.15397	-0.40658		-0.15474	-0.18072
			-0.14898	-0.39959		-0.14818	-0.17753
			-0.14743	-0.39242		-0.14818	-0.17457
			-0.14197	-0.38528		-0.14153	-0.17139
			-0.14082	-0.37786		-0.14153	-0.16786
			-0.13499	-0.37035		-0.13495	-0.16462
			-0.13407	-0.36267		-0.13495	-0.16147
			-0.12795	-0.35425		-0.12812	-0.15838
			-0.12752	-0.34673		-0.12812	-0.15556
			-0.12093	-0.33892		-0.1214	-0.15219
			-0.12088	-0.33031		-0.11619	-0.14848
			-0.11416	-0.32198		-0.11467	-0.14488
			-0.11416	-0.31382		-0.10915	-0.14136
			-0.10764	-0.30552		-0.10784	-0.13802
			-0.10764	-0.29644		-0.10214	-0.1348
			-0.10085	-0.28746		-0.10128	-0.13091
			-0.10085	-0.27926		-0.09505	-0.1267
			-0.09409	-0.27037		-0.09462	-0.12298
			-0.09409	-0.26079		-0.08801	-0.11927
			-0.08739	-0.25122		-0.08789	-0.11547
			-0.08221	-0.24251		-0.08122	-0.11167
			-0.08079	-0.23366		-0.08122	-0.10781
			-0.07521	-0.22438		-0.07457	-0.10394
			-0.07421	-0.21499		-0.07457	-0.09994
			-0.06818	-0.20509		-0.06786	-0.09562
			-0.06752	-0.19528		-0.06786	-0.09116
			-0.06119	-0.18559		-0.06127	-0.08669
			-0.061	-0.17563		-0.06127	-0.08254
			-0.05422	-0.16611		-0.05437	-0.07836
			-0.05419	-0.15657		-0.05437	-0.07428
			-0.04714	-0.14608		-0.04739	-0.06983
			-0.04714	-0.13545		-0.04739	-0.065
			-0.04022	-0.12501		-0.04052	-0.06028
			-0.04022	-0.11491		-0.03547	-0.05583
			-0.03377	-0.10494		-0.03406	-0.05118
			-0.03377	-0.09476		-0.02869	-0.04641
			-0.02715	-0.0845		-0.02775	-0.0419
			-0.02715	-0.07432		-0.0218	-0.03715
			-0.0206	-0.06406		-0.02144	-0.0322
			-0.0206	-0.05382		-0.01492	-0.02701
			-0.01407	-0.0434		-0.01482	-0.02184
			-0.01407	-0.03296		-0.00805	-0.01681
			-0.00746	-0.01989		-0.00802	-0.0095
			0.00151	-0.0013		0.00365	0.000147991
			0.00416	0.01369		0.00365	0.00715
			0.0075	0.02163		0.00761	0.01093
			0.00831	0.02869		0.00761	0.01474
			0.01299	0.03684		0.01292	0.01873
			0.01381	0.04566		0.01292	0.02294
			0.0194	0.0551		0.01914	0.02783
			0.02013	0.06501		0.01914	0.03272
			0.02621	0.07518		0.02585	0.03761
			0.02663	0.0852		0.02585	0.04234
			0.03305	0.09523		0.03234	0.04692
			0.03308	0.10597		0.03234	0.0516
			0.03979	0.11642		0.03914	0.05632
			0.03979	0.12642		0.04481	0.0612
			0.04686	0.13693		0.04626	0.06599
			0.04686	0.1479		0.05215	0.07045
			0.05389	0.1588		0.05342	0.07472
			0.05389	0.16905		0.05942	0.07931
			0.06083	0.17891		0.06033	0.084
			0.06083	0.18896		0.06653	0.08849
			0.06787	0.19912		0.0673	0.09297
			0.06787	0.20868		0.07366	0.0973
			0.07477	0.21845		0.07429	0.10131
			0.07477	0.2285		0.08071	0.10506
			0.08166	0.23801		0.08111	0.10909
			0.0868	0.24682		0.08776	0.11309
			0.08842	0.25591		0.08792	0.11723
			0.09383	0.26497		0.09473	0.12122
			0.09531	0.27322		0.09473	0.12516
			0.10089	0.28212		0.10132	0.12862
			0.10208	0.29148		0.10132	0.13215
			0.10801	0.30068		0.10785	0.1358
			0.10899	0.30877		0.10785	0.13928
			0.11506	0.31687		0.11464	0.14269
			0.11598	0.32574		0.11464	0.14605
			0.12203	0.33407		0.12142	0.14969
			0.12268	0.34207		0.12142	0.15318
			0.12907	0.35002		0.12818	0.15612
			0.12938	0.35838		0.13353	0.15902
			0.13609	0.36658		0.13495	0.1622
			0.13616	0.37409		0.14054	0.16552
			0.14309	0.3812		0.1416	0.16885
			0.14309	0.3882		0.14755	0.17211
			0.14977	0.39531		0.14834	0.17502
			0.14977	0.40294		0.15455	0.17798
			0.15656	0.41036		0.15511	0.18043
			0.15657	0.41725		0.16154	0.18343
			0.16322	0.42462		0.16193	0.18634
			0.16322	0.43186		0.16849	0.18894
			0.16964	0.4396		0.16859	0.19204
			0.16964	0.44628		0.17526	0.1949
			0.17616	0.45136		0.17526	0.19798
			0.18146	0.45829		0.18189	0.20106
			0.18292	0.46579		0.18189	0.2035
			0.18848	0.47198		0.1887	0.20675
			0.18963	0.47766		0.1887	0.20973
			0.19548	0.48358		0.19537	0.21158
			0.19623	0.48933		0.19537	0.21352
			0.20248	0.49532		0.20229	0.21635
			0.20294	0.50039		0.20229	0.21882
			0.20949	0.50507		0.209	0.22131
			0.20961	0.51113		0.209	0.22334
			0.21623	0.51844		0.21587	0.22546
			0.21623	0.52426		0.21587	0.22767
			0.22273	0.53069		0.22282	0.2301
			0.22273	0.53664		0.22282	0.23211
			0.22952	0.54092		0.2297	0.23328
			0.22952	0.5462		0.23499	0.23548
			0.23617	0.55226		0.23657	0.23853
			0.23617	0.55782		0.24199	0.24075
			0.24282	0.56239		0.24337	0.24197
			0.24799	0.56644		0.24896	0.24387
			0.24957	0.57156		0.24995	0.24608
			0.25501	0.57692		0.25594	0.24774
			0.25623	0.58154		0.25678	0.24953
			0.26199	0.58554		0.26294	0.25213
			0.26304	0.58962		0.26324	0.25463
			0.26894	0.59452		0.26977	0.25595
			0.26975	0.60019		0.26977	0.25728
			0.27591	0.60394		0.27645	0.25909
			0.27618	0.60797		0.27645	0.26116
			0.28283	0.61253		0.28305	0.26306
			0.28283	0.61675		0.28305	0.26454
			0.28932	0.62057		0.28974	0.26642
			0.28932	0.62475		0.28974	0.26839
			0.29583	0.6301		0.29645	0.26984
			0.29583	0.63476		0.29645	0.27112
			0.30279	0.63736		0.30313	0.27252
			0.30279	0.64041		0.30833	0.27394
			0.30967	0.64444		0.30974	0.27554
			0.30967	0.64881		0.31532	0.27689
			0.31647	0.65349		0.3163	0.27836
			0.31647	0.65729		0.32232	0.27995
			0.32319	0.65951		0.32284	0.28143
			0.32838	0.66313		0.32929	0.28303
			0.32975	0.66624		0.32943	0.28497
			0.3354	0.67132		0.33604	0.28658
			0.3365	0.6749		0.33604	0.28769
			0.34232	0.67756		0.34296	0.28879
			0.34308	0.68047		0.34296	0.28992
			0.34936	0.68264		0.34959	0.29138
			0.34982	0.68636		0.34959	0.29332
			0.35632	0.69002		0.35627	0.29481
			0.35637	0.69318		0.35627	0.29576
			0.36293	0.69662		0.3629	0.29659
			0.36293	0.69903		0.3629	0.29736
			0.36966	0.7007		0.36953	0.29815
			0.36966	0.70387		0.36953	0.29979
			0.37636	0.70736		0.3764	0.30151
			0.37636	0.71029		0.38163	0.30323
			0.38297	0.71358		0.38309	0.30525
			0.38297	0.71528		0.3886	0.30667
			0.38976	0.71693		0.38984	0.30686
			0.38976	0.72154		0.39563	0.30781
			0.3964	0.72565		0.39675	0.30951
			0.40165	0.72671		0.4026	0.31056
			0.40314	0.72756		0.40342	0.31151
			0.40867	0.73218		0.40956	0.31263
			0.40988	0.73591		0.41018	0.31394
			0.41567	0.73719		0.41659	0.31457
			0.41648	0.73935		0.41692	0.31493
			0.4226	0.74119		0.42348	0.31604
			0.42334	0.74342		0.42348	0.31739
			0.42962	0.74617		0.43	0.31882
			0.43001	0.74789		0.43	0.32027
			0.4366	0.75017		0.43656	0.32159
			0.43682	0.75338		0.43656	0.32226
			0.44344	0.75564		0.44329	0.32233
			0.44344	0.75918		0.44329	0.32261
			0.45001	0.76274		0.44982	0.32312
			0.45001	0.76411		0.44982	0.32391
			0.45657	0.76551		0.45662	0.32508
			0.45657	0.76666		0.46198	0.32637
			0.46323	0.76965		0.46329	0.32738
			0.46323	0.77229		0.46893	0.32821
			0.47019	0.77505		0.46982	0.32923
			0.47019	0.77626		0.47597	0.33001
			0.47681	0.77646		0.47677	0.33118
			0.48201	0.77753		0.48294	0.33214
			0.48363	0.78004		0.48344	0.3327
			0.48899	0.78223		0.48993	0.33314
			0.49049	0.78493		0.49015	0.33336
			0.496	0.78779		0.49676	0.33465
			0.49738	0.7893		0.49676	0.33617
			0.50304	0.79112		0.50348	0.33662
			0.50425	0.79242		0.50348	0.33741
			0.51003	0.79314		0.51029	0.33847
			0.51097	0.79697		0.51029	0.3393
			0.51704	0.80029		0.51721	0.34008
			0.51753	0.8009		0.51721	0.34084
			0.524	0.80138		0.52407	0.34142
			0.52428	0.80286		0.52407	0.3424
			0.53095	0.80472		0.53064	0.34296
			0.53095	0.80697		0.53064	0.34351
			0.53794	0.80709		0.53741	0.34403
			0.53794	0.80751		0.53741	0.3448
			0.54478	0.81071		0.54402	0.34567
			0.54478	0.81303		0.54938	0.34646
			0.55164	0.81413		0.55054	0.34703
			0.55164	0.8152		0.5564	0.34727
			0.5585	0.81602		0.55711	0.34813
			0.5585	0.81858		0.56342	0.34938
			0.56519	0.823		0.56376	0.34976
			0.56519	0.82347		0.57039	0.34968
			0.57174	0.82331		0.57045	0.35015
			0.57174	0.82629		0.57726	0.3502
			0.57842	0.82968		0.57726	0.34933
			0.58361	0.83018		0.58393	0.34929
			0.58523	0.82981		0.58392	0.34964
			0.59061	0.83165		0.59067	0.34942
			0.59173	0.83359		0.59067	0.34958
			0.59763	0.83415		0.5973	0.35097
			0.59842	0.83409		0.5973	0.35208
			0.60468	0.83451		0.604	0.35395
			0.60533	0.83545		0.60904	0.35476
			0.61167	0.83672		0.6105	0.35449
			0.61215	0.83903		0.61601	0.35462
			0.61867	0.84145		0.61711	0.35439
			0.61873	0.84087		0.62305	0.35433
			0.62543	0.84109		0.62365	0.35521
			0.62543	0.84383		0.63	0.35611
			0.6323	0.84617		0.63019	0.35618
			0.6323	0.84639		0.63677	0.35539
			0.63904	0.8444		0.63677	0.35486
			0.63904	0.84836		0.64361	0.35533
			0.64569	0.8524		0.64361	0.3571
			0.64569	0.85343		0.65053	0.35841
			0.65261	0.85186		0.65053	0.35918
			0.65261	0.85095		0.65716	0.35961
			0.65938	0.85275		0.65716	0.35989
			0.65938	0.8551		0.66407	0.36004
			0.66596	0.85631		0.66407	0.36082
			0.67115	0.85546		0.6707	0.36208
			0.67276	0.85781		0.6707	0.36318
			0.67814	0.85926		0.67744	0.36385
			0.67961	0.85935		0.67744	0.36285
			0.6851	0.86012		0.68414	0.36174
			0.68629	0.86141		0.6895	0.36118
			0.69211	0.86059		0.69079	0.36079
			0.69282	0.86034		0.69648	0.36033
			0.69911	0.86289		0.69763	0.36106
			0.69938	0.86484		0.70347	0.36331
			0.70608	0.86692		0.70427	0.3638
			0.7061	0.86742		0.71041	0.36343
			0.71272	0.86741		0.711	0.36396
			0.71272	0.86703		0.71741	0.36542
			0.71932	0.86752		0.71751	0.36699
			0.71932	0.86909		0.72395	0.36706
			0.72595	0.8701		0.72395	0.36626
			0.72595	0.87193		0.73054	0.36586
			0.73276	0.8741		0.73054	0.3659
			0.73276	0.87425		0.73727	0.36605
			0.73935	0.87342		0.73727	0.36646
			0.73935	0.87252		0.74397	0.36761
			0.74599	0.87563		0.74397	0.36827
			0.75125	0.87802		0.75063	0.36887
			0.75252	0.8769		0.75063	0.36908
			0.75825	0.87537		0.75738	0.36806
			0.7593	0.87641		0.76258	0.36792
			0.76518	0.88064		0.76403	0.36751
			0.76604	0.88337		0.76955	0.36738
			0.77214	0.88307		0.77087	0.36755
			0.77265	0.88235		0.77653	0.36649
			0.77918	0.88285		0.7774	0.36553
			0.77945	0.88225		0.78346	0.36506
			0.7861	0.88297		0.78398	0.36514
			0.78621	0.88587		0.7904	0.36607
			0.79279	0.88792		0.79049	0.36683
			0.79279	0.88656		0.79689	0.36736
			0.79947	0.88532		0.79689	0.36862
			0.79947	0.88531		0.80351	0.369
			0.80605	0.88658		0.80351	0.36872
			0.80605	0.88807		0.81009	0.36862
			0.81269	0.88826		0.81009	0.3677
			0.81269	0.88877		0.81676	0.36754
			0.81906	0.88877		0.81676	0.36821
			0.81906	0.88966		0.82357	0.36882
			0.8257	0.88972		0.82357	0.36833
			0.8257	0.8898		0.83017	0.36717
			0.83251	0.8883		0.83516	0.36641
			0.83775	0.88701		0.8367	0.3653
			0.83902	0.88908		0.84201	0.36336
			0.84461	0.89362		0.8432	0.36152
			0.84572	0.89366		0.84887	0.36098
			0.8515	0.89279		0.84954	0.36028
			0.85224	0.89365		0.85573	0.35898
			0.85833	0.89302		0.85604	0.35877
			0.85884	0.89594		0.86257	0.35908
			0.86519	0.89778		0.86264	0.35931
			0.8654	0.8983		0.869	0.35955
			0.87194	0.89892		0.869	0.3599
			0.87196	0.89667		0.87558	0.36116
			0.87857	0.89667		0.87558	0.36294
			0.87857	0.89798		0.88206	0.36196
			0.88496	0.89981		0.88205	0.36053
			0.88496	0.8995		0.8886	0.35992
			0.89143	0.899		0.8886	0.35945
			0.89143	0.89851		0.89494	0.35976
			0.89786	0.8988		0.89494	0.36022
			0.89787	0.90039		0.90159	0.3596
			0.90432	0.90138		0.90159	0.35984
			0.90431	0.90238		0.90822	0.35921
			0.91078	0.90092		0.91326	0.35857
			0.91584	0.89948		0.91456	0.3584
			0.91703	0.89933		0.92	0.3582
			0.9226	0.9004		0.92118	0.35867
			0.92349	0.90255		0.92672	0.35886
			0.92933	0.90363		0.92774	0.35758
			0.93008	0.90166		0.93349	0.35596
			0.93598	0.90095		0.93432	0.35459
			0.93642	0.9029		0.94007	0.35439
			0.94264	0.9031		0.94058	0.35608
			0.94295	0.90109		0.94677	0.35651
			0.94933	0.89871		0.94691	0.35514
			0.94952	0.90003		0.9532	0.35398
			0.95596	0.90143		0.9532	0.35381
			0.95606	0.9021		0.95947	0.35449
			0.96254	0.90304		0.95947	0.35583
			0.96254	0.90339		0.96568	0.35615
			0.96878	0.90235		0.96568	0.35422
			0.96878	0.90124		0.97215	0.35211
			0.97508	0.90164		0.97215	0.35183
			0.97508	0.90288		0.97832	0.35241
			0.98225	0.90552		0.97832	0.35313
			0.98225	0.90459		0.98896	0.35394
			0.99379	0.90235		0.98896	0.35584
			1.0022	0.90488		1.0022	0.35582
			1.00455	0.90694		1.0049	0.3546
			1.00587	0.90565		1.00566	0.35395
			1.00616	0.90527		1.00596	0.35321
			1.00331	0.90563		1.00603	0.35202

## Sheet: Figure 8b
				water		chloroform
1.0059	1		-0.00747	-0.05895		-0.00287	-0.00678
1.00624	1.00019		-0.00747	-0.07601		-0.00287	-0.00678
1.00656	1.00006		-0.01114	-0.09098		-0.00287	-0.00662
1.00656	0.99999		-0.0117	-0.10621		-0.00302	-0.00655
1.00656	0.9999		-0.0117	-0.12232		-0.00304	-0.00655
0.96883	0.99891		-0.01499	-0.13892		-0.00304	-0.00655
0.96854	0.99888		-0.0163	-0.15583		-0.00266	-0.00655
0.96843	0.99879		-0.01664	-0.17333		-0.00251	-0.00621
0.96843	0.99865		-0.01664	-0.19095		-0.00248	-0.0047
0.96843	0.99853		-0.021	-0.20865		-0.00248	-0.000995382
0.93955	0.99671		-0.02248	-0.22648		0.00117	0.00469
0.93955	0.99663		-0.02248	-0.24417		0.00244	0.01205
0.93955	0.99647		-0.02248	-0.26181		0.00244	0.02091
0.93955	0.99653		-0.02782	-0.27913		0.00244	0.03069
0.93967	0.99686		-0.02904	-0.29606		0.00722	0.0413
0.91096	0.99497		-0.02904	-0.31227		0.00855	0.05214
0.91096	0.99492		-0.02904	-0.32763		0.00855	0.06306
0.91096	0.99477		-0.03443	-0.34221		0.00855	0.07413
0.91044	0.9947		-0.03512	-0.35632		0.01419	0.08514
0.91034	0.9947		-0.03512	-0.36995		0.0154	0.09583
0.88172	0.9934		-0.03982	-0.38291		0.0154	0.10598
0.88136	0.9934		-0.04164	-0.39456		0.0154	0.11606
0.88127	0.99334		-0.0419	-0.40612		0.02124	0.12579
0.88118	0.99331		-0.0419	-0.41761		0.02202	0.13502
0.88109	0.99309		-0.0469	-0.42874		0.02202	0.14395
0.85209	0.992		-0.04843	-0.43976		0.0265	0.15252
0.8519	0.99198		-0.04843	-0.45		0.02826	0.16058
0.85171	0.99188		-0.04843	-0.46019		0.02855	0.16848
0.85151	0.99164		-0.05406	-0.47026		0.02854	0.1759
0.85293	0.99157		-0.05517	-0.47929		0.03351	0.18307
0.82247	0.98995		-0.05517	-0.48779		0.03499	0.18996
0.82226	0.99011		-0.05517	-0.49549		0.03499	0.19655
0.82204	0.9902		-0.06136	-0.50261		0.03499	0.20303
0.82199	0.99005		-0.06215	-0.51024		0.04087	0.20919
0.82199	0.98989		-0.06215	-0.51755		0.04184	0.21525
0.79254	0.9886		-0.06656	-0.52409		0.04184	0.22128
0.79218	0.9885		-0.06828	-0.53026		0.04659	0.22688
0.79208	0.98838		-0.06861	-0.53555		0.0485	0.23189
0.79208	0.98823		-0.06861	-0.54111		0.04918	0.23667
0.79208	0.98813		-0.07379	-0.54705		0.04918	0.24116
0.7627	0.98639		-0.0755	-0.55212		0.05413	0.24567
0.76236	0.98622		-0.0755	-0.55697		0.056	0.24972
0.76236	0.98617		-0.0755	-0.56225		0.05608	0.25349
0.76236	0.98619		-0.08089	-0.56718		0.05608	0.2576
0.76236	0.9862		-0.08212	-0.57219		0.0612	0.26164
0.73244	0.98449		-0.08212	-0.57654		0.06266	0.26515
0.73244	0.98438		-0.08212	-0.58031		0.06266	0.26841
0.73244	0.98431		-0.08755	-0.58526		0.06266	0.27188
0.73244	0.98434		-0.08825	-0.5903		0.06838	0.2751
0.73197	0.98417		-0.08826	-0.59476		0.06947	0.27778
0.70271	0.98241		-0.09294	-0.59865		0.06947	0.2807
0.70271	0.98213		-0.09476	-0.6028		0.0738	0.28376
0.70271	0.98202		-0.09505	-0.60698		0.07561	0.28655
0.70236	0.98201		-0.09505	-0.61106		0.07632	0.28942
0.70228	0.98198		-0.09988	-0.61509		0.07632	0.29188
0.67288	0.98001		-0.10147	-0.61831		0.081	0.29381
0.67241	0.97991		-0.10148	-0.62012		0.08279	0.29593
0.6723	0.9798		-0.10147	-0.61507		0.08301	0.29815
0.67219	0.97967		-0.10505	-0.60026		0.08301	0.30056
0.67208	0.97963		-0.1059	-0.60182		0.08821	0.30257
0.64201	0.97762		-0.1059	-0.61524		0.08983	0.3044
0.64177	0.9774		-0.1059	-0.6258		0.08983	0.30636
0.64153	0.97722		-0.11328	-0.63253		0.08983	0.30804
0.64153	0.97718		-0.11444	-0.63648		0.09527	0.30957
0.64153	0.97701		-0.11444	-0.63904		0.09637	0.31132
0.61183	0.97447		-0.11862	-0.6414		0.09637	0.31299
0.61183	0.97441		-0.1203	-0.64356		0.10068	0.31459
0.61183	0.97444		-0.12067	-0.6452		0.1025	0.31648
0.61183	0.97451		-0.12067	-0.64775		0.10311	0.31789
0.61183	0.97444		-0.12549	-0.65144		0.10311	0.31973
0.58137	0.97181		-0.12717	-0.65443		0.108	0.32153
0.58137	0.97191		-0.12717	-0.65602		0.10983	0.32261
0.58137	0.9718		-0.12717	-0.6585		0.10991	0.32364
0.58137	0.97175		-0.13263	-0.65915		0.10991	0.32505
0.58127	0.97168		-0.13389	-0.65881		0.11493	0.3265
0.55146	0.96894		-0.13389	-0.65943		0.11618	0.32786
0.55146	0.96891		-0.13389	-0.6632		0.11618	0.32887
0.55108	0.96877		-0.13934	-0.66664		0.11618	0.32982
0.551	0.96859		-0.14019	-0.66959		0.12225	0.33075
0.55092	0.96855		-0.14019	-0.67215		0.12321	0.33178
0.52221	0.96615		-0.14442	-0.67332		0.12321	0.33305
0.52135	0.96591		-0.14612	-0.67346		0.12761	0.33414
0.52116	0.96569		-0.14665	-0.67357		0.12938	0.33491
0.52098	0.96561		-0.14665	-0.67452		0.12991	0.33604
0.52221	0.96556		-0.15154	-0.67622		0.12991	0.33702
0.4912	0.96231		-0.15336	-0.67805		0.13461	0.33813
0.49096	0.96207		-0.15365	-0.67974		0.13634	0.33918
0.49072	0.96191		-0.15365	-0.68215		0.13639	0.34035
0.49233	0.96178		-0.15823	-0.68506		0.13639	0.34123
0.49233	0.96173		-0.15959	-0.68688		0.14162	0.34203
0.461	0.95859		-0.15959	-0.68767		0.1431	0.34292
0.4607	0.95853		-0.15959	-0.68797		0.1431	0.34348
0.46041	0.9584		-0.16507	-0.68842		0.1431	0.34429
0.46041	0.95821		-0.1661	-0.69007		0.1487	0.34521
0.46041	0.95801		-0.1661	-0.69205		0.1498	0.34608
0.43068	0.95376		-0.1661	-0.69362		0.1498	0.34754
0.43029	0.95364		-0.17208	-0.69498		0.15409	0.34853
0.43029	0.95343		-0.1727	-0.69617		0.15589	0.3489
0.43029	0.9532		-0.1727	-0.69786		0.15652	0.34912
0.43029	0.9531		-0.17727	-0.69911		0.15652	0.34972
0.40044	0.94873		-0.179	-0.7007		0.1613	0.35044
0.40044	0.94869		-0.17932	-0.70208		0.16311	0.35082
0.40044	0.94858		-0.17932	-0.7038		0.1635	0.3514
0.40044	0.94844		-0.18408	-0.70352		0.1635	0.35258
0.40007	0.94831		-0.18566	-0.70338		0.16837	0.35316
0.3701	0.94244		-0.18566	-0.70423		0.17012	0.35376
0.3701	0.94234		-0.18881	-0.70532		0.17027	0.35451
0.3701	0.94232		-0.19091	-0.70615		0.17027	0.35549
0.36976	0.94218		-0.19196	-0.70726		0.17552	0.35607
0.36968	0.94222		-0.19196	-0.70881		0.17719	0.35664
0.34051	0.93605		-0.19196	-0.71015		0.17719	0.35767
0.34051	0.93596		-0.198	-0.71093		0.17719	0.35857
0.33991	0.93585		-0.19877	-0.71127		0.18246	0.3592
0.33977	0.93573		-0.19877	-0.7117		0.18352	0.3595
0.33963	0.93569		-0.20323	-0.71248		0.18352	0.35992
0.3106	0.92904		-0.20496	-0.71374		0.18776	0.36028
0.3106	0.92893		-0.20534	-0.71489		0.18954	0.36029
0.3106	0.92873		-0.20534	-0.71581		0.19022	0.36017
0.30989	0.92844		-0.20999	-0.71577		0.19022	0.36034
0.30974	0.92837		-0.21162	-0.71705		0.19492	0.36118
0.28016	0.91978		-0.21162	-0.71869		0.19671	0.36156
0.28016	0.91956		-0.21162	-0.71929		0.19684	0.36185
0.27934	0.91932		-0.21694	-0.71949		0.19684	0.36251
0.27917	0.91911		-0.21812	-0.71988		0.20206	0.36318
0.279	0.91879		-0.21812	-0.7209		0.20351	0.3637
0.24954	0.90805		-0.21812	-0.72207		0.20351	0.36395
0.24929	0.90761		-0.22387	-0.72376		0.20351	0.36441
0.24904	0.90733		-0.22468	-0.72511		0.20904	0.365
0.24879	0.9073		-0.22468	-0.72512		0.20992	0.36574
0.25055	0.90724		-0.22893	-0.72446		0.20992	0.3663
0.21889	0.89401		-0.23061	-0.72404		0.21435	0.36651
0.21863	0.89376		-0.23109	-0.72369		0.21612	0.36645
0.21846	0.8936		-0.23109	-0.72468		0.21663	0.36695
0.21846	0.8934		-0.23571	-0.72637		0.21663	0.36768
0.21846	0.89335		-0.23741	-0.72699		0.22147	0.36836
0.18866	0.87661		-0.23752	-0.7269		0.22326	0.36898
0.18832	0.87613		-0.23752	-0.7273		0.22354	0.36942
0.18832	0.87579		-0.24266	-0.72801		0.22354	0.36963
0.18832	0.87566		-0.24416	-0.72922		0.22865	0.36956
0.18832	0.87553		-0.24416	-0.72937		0.2303	0.36965
0.15849	0.853		-0.24728	-0.72915		0.2303	0.36985
0.15849	0.85253		-0.24937	-0.73047		0.2303	0.37021
0.15849	0.85218		-0.2504	-0.7324		0.23564	0.37058
0.1581	0.85196		-0.2504	-0.73252		0.23685	0.37107
0.158	0.85176		-0.2504	-0.73216		0.23685	0.3711
0.12881	0.81974		-0.25645	-0.73333		0.23685	0.37098
0.12881	0.81896		-0.25709	-0.73456		0.24278	0.37125
0.1283	0.81848		-0.25709	-0.73589		0.24359	0.37208
0.12818	0.81801		-0.26165	-0.73722		0.24359	0.37265
0.12806	0.81764		-0.26337	-0.73738		0.24817	0.37284
0.09881	0.7692		-0.26367	-0.73609		0.24996	0.37308
0.0979	0.76815		-0.26367	-0.73485		0.25014	0.37355
0.09769	0.76736		-0.26827	-0.73448		0.25014	0.37385
0.09748	0.76673		-0.26969	-0.73552		0.25522	0.37414
0.09726	0.76639		-0.26969	-0.73562		0.25663	0.37443
0.08755	0.74315		-0.26969	-0.73594		0.25663	0.37484
0.08755	0.74272		-0.27498	-0.73667		0.25663	0.37525
0.08734	0.74241		-0.27591	-0.73727		0.26213	0.37554
0.08729	0.74214		-0.27591	-0.73797		0.26305	0.37567
0.08724	0.74202		-0.27591	-0.73916		0.26305	0.37586
0.07711	0.7149		-0.28212	-0.73927		0.26736	0.37618
0.07711	0.71421		-0.28287	-0.73879		0.26911	0.37637
0.07711	0.71372		-0.28287	-0.73975		0.26967	0.37624
0.07703	0.71334		-0.28715	-0.74202		0.26967	0.37631
0.07701	0.71313		-0.2888	-0.74249		0.27452	0.37644
0.06744	0.68175		-0.28916	-0.74196		0.27633	0.37676
0.06732	0.68102		-0.28916	-0.74174		0.27638	0.37747
0.06732	0.68035		-0.29399	-0.74167		0.27638	0.37814
0.06732	0.67973		-0.29571	-0.74112		0.28157	0.3784
0.06732	0.67934		-0.29571	-0.74146		0.28299	0.37832
0.05738	0.64004		-0.29571	-0.74918		0.28298	0.37814
0.0573	0.6391		-0.29774	-0.76575		0.28298	0.37852
0.05721	0.63842		-0.29823	-0.76539		0.28868	0.3788
0.05781	0.63775		-0.29823	-0.75412		0.28975	0.3791
0.05781	0.63729		-0.29823	-0.7486		0.28975	0.37923
0.0472	0.58666		-0.30679	-0.7468		0.29399	0.3794
0.04702	0.58567		-0.30811	-0.74594		0.29575	0.37992
0.04699	0.58481		-0.30811	-0.74604		0.29636	0.38001
0.04695	0.58418		-0.31282	-0.74704		0.29636	0.38013
0.0472	0.58369		-0.31471	-0.74801		0.30105	0.38078
0.03689	0.51914		-0.31517	-0.74868		0.30282	0.38154
0.03689	0.51729		-0.31517	-0.74884		0.30297	0.38174
0.03689	0.51581		-0.3197	-0.74915		0.30297	0.3816
0.03667	0.51458		-0.32134	-0.75057		0.3079	0.38143
0.03662	0.51358		-0.32149	-0.75107		0.30925	0.38158
0.02695	0.43149		-0.32149	-0.75013		0.30925	0.38132
0.02695	0.42942		-0.32663	-0.74966		0.30925	0.38157
0.02695	0.42774		-0.32807	-0.7497		0.31514	0.38197
0.02695	0.42643		-0.32807	-0.75011		0.31606	0.38233
0.02677	0.42537		-0.32807	-0.75009		0.31606	0.38259
0.01718	0.31751		-0.33366	-0.75016		0.32048	0.38254
0.01699	0.31406		-0.33465	-0.75068		0.32224	0.3822
0.0169	0.3113		-0.33465	-0.75121		0.32275	0.3823
0.0169	0.30912		-0.33465	-0.75054		0.32275	0.38234
0.0169	0.30738		-0.34042	-0.74992		0.32728	0.38256
0.00697	0.16667		-0.34096	-0.75077		0.32895	0.38287
0.0068	0.16188		-0.34096	-0.75154		0.32906	0.38327
0.00663	0.15798		-0.34535	-0.75155		0.32906	0.38393
0.00782	0.15484		-0.34699	-0.75168		0.33432	0.3844
0.00782	0.15239		-0.34716	-0.75178		0.33577	0.38518
-0.00187	-0.01644		-0.34716	-0.75236		0.33577	0.38537
-0.00244	-0.02157		-0.3524	-0.75334		0.33577	0.38522
-0.00256	-0.02538		-0.35398	-0.75416		0.34142	0.38499
-0.00268	-0.02871		-0.35398	-0.75423		0.3423	0.38509
-0.00187	-0.03119		-0.35398	-0.75417		0.3423	0.3855
-0.01256	-0.20307		-0.35911	-0.75461		0.34674	0.38558
-0.01269	-0.2067		-0.36013	-0.75547		0.34852	0.38551
-0.01269	-0.2097		-0.36013	-0.75673		0.34885	0.38542
-0.01269	-0.21205		-0.36013	-0.75718		0.34885	0.38562
-0.01269	-0.21387		-0.36583	-0.75627		0.35386	0.38544
-0.02265	-0.34734		-0.36649	-0.75568		0.35548	0.38556
-0.02278	-0.35002		-0.36648	-0.75545		0.35548	0.38602
-0.02278	-0.35221		-0.37111	-0.75562		0.35548	0.38596
-0.02278	-0.35398		-0.37287	-0.7565		0.36057	0.38593
-0.02278	-0.35547		-0.37322	-0.75707		0.36167	0.38619
-0.03265	-0.45671		-0.37322	-0.7582		0.36167	0.3868
-0.03276	-0.45887		-0.37802	-0.75977		0.36574	0.38675
-0.03276	-0.46055		-0.37962	-0.76056		0.36748	0.38651
-0.03276	-0.46193		-0.37962	-0.76035		0.3682	0.38647
-0.03276	-0.46308		-0.37962	-0.75984		0.3682	0.3865
-0.04259	-0.5371		-0.38508	-0.75934		0.37276	0.38696
-0.04278	-0.53887		-0.3863	-0.75901		0.37452	0.38705
-0.04296	-0.54045		-0.3863	-0.75941		0.37471	0.38683
-0.04168	-0.54155		-0.3863	-0.76045		0.37471	0.38706
-0.04168	-0.54252		-0.39196	-0.76109		0.37994	0.38771
-0.05265	-0.60348		-0.39281	-0.76187		0.3815	0.38811
-0.05265	-0.60496		-0.39281	-0.76235		0.3815	0.38794
-0.05334	-0.60603		-0.3971	-0.76275		0.3815	0.38802
-0.05349	-0.60688		-0.39882	-0.76269		0.38711	0.38836
-0.05363	-0.60759		-0.39931	-0.76325		0.38824	0.38825
-0.06338	-0.65493		-0.39931	-0.76354		0.38824	0.38871
-0.06338	-0.65586		-0.40388	-0.76375		0.39242	0.38922
-0.06338	-0.65664		-0.40557	-0.76325		0.39419	0.38904
-0.06371	-0.65725		-0.40574	-0.76206		0.39484	0.38861
-0.06377	-0.65761		-0.40574	-0.76142		0.39484	0.3889
-0.07339	-0.69302		-0.41067	-0.76216		0.39925	0.38897
-0.07344	-0.6937		-0.41219	-0.76346		0.40092	0.38887
-0.07344	-0.69435		-0.41219	-0.76481		0.40113	0.3891
-0.07344	-0.69496		-0.41219	-0.76591		0.40113	0.38961
-0.07344	-0.69528		-0.41741	-0.76589		0.40644	0.38999
-0.08357	-0.72563		-0.41861	-0.76634		0.40814	0.38978
-0.08377	-0.72615		-0.41861	-0.76598		0.40814	0.3894
-0.0838	-0.72657		-0.41861	-0.76611		0.40814	0.38999
-0.0838	-0.72698		-0.42417	-0.76603		0.41338	0.39078
-0.0838	-0.72716		-0.42519	-0.76298		0.41459	0.39078
-0.09361	-0.75215		-0.42519	-0.76271		0.41459	0.39057
-0.09373	-0.75263		-0.42519	-0.76482		0.41459	0.39116
-0.09386	-0.753		-0.43127	-0.76598		0.42041	0.39119
-0.09392	-0.75325		-0.43193	-0.76729		0.42118	0.39108
-0.09392	-0.75343		-0.43193	-0.76776		0.42118	0.391
-0.1034	-0.77442		-0.43668	-0.76828		0.42559	0.39053
-0.1034	-0.77479		-0.43849	-0.76735		0.42731	0.39048
-0.10377	-0.775		-0.43878	-0.7657		0.42769	0.39089
-0.10384	-0.77503		-0.43878	-0.76455		0.42769	0.39112
-0.10392	-0.77515		-0.44355	-0.76452		0.43257	0.39097
-0.10396	-0.7759		-0.44502	-0.76556		0.43432	0.39173
-0.10396	-0.77608		-0.44501	-0.76524		0.43441	0.39226
-0.10396	-0.77607		-0.44501	-0.7616		0.43441	0.39223
-0.10396	-0.77605		-0.45015	-0.76033		0.43986	0.39193
-0.10397	-0.77602		-0.45132	-0.7631		0.44132	0.39229
-0.133	-0.82213		-0.45132	-0.76625		0.44132	0.39276
-0.133	-0.82276		-0.45132	-0.76715		0.44132	0.39284
-0.13348	-0.82309		-0.45706	-0.76727		0.44682	0.39303
-0.13359	-0.82336		-0.45793	-0.767		0.44771	0.39296
-0.1337	-0.82366		-0.45793	-0.76664		0.44771	0.39269
-0.16297	-0.85489		-0.46239	-0.76642		0.45212	0.39241
-0.16321	-0.85534		-0.46418	-0.76661		0.45389	0.39265
-0.16345	-0.8556		-0.46466	-0.76748		0.45453	0.39314
-0.16369	-0.85566		-0.46467	-0.76782		0.45453	0.39292
-0.16192	-0.85565		-0.46931	-0.76801		0.4592	0.39321
-0.19229	-0.87641		-0.47101	-0.76787		0.46097	0.39363
-0.19271	-0.87743		-0.4711	-0.76849		0.46114	0.39375
-0.19271	-0.87798		-0.4711	-0.76967		0.46114	0.39376
-0.19271	-0.87837		-0.47623	-0.77025		0.46613	0.39406
-0.19271	-0.8786		-0.4775	-0.77027		0.46758	0.39391
-0.22268	-0.89545		-0.4775	-0.77031		0.46758	0.39382
-0.22275	-0.89561		-0.4775	-0.76995		0.46758	0.39416
-0.22275	-0.89575		-0.48306	-0.76867		0.47336	0.39468
-0.22275	-0.89589		-0.48395	-0.76856		0.47441	0.39477
-0.22275	-0.89597		-0.48395	-0.76975		0.47441	0.3942
-0.25232	-0.90931		-0.48832	-0.77001		0.47866	0.39405
-0.25232	-0.90953		-0.49009	-0.77079		0.48042	0.39415
-0.25232	-0.90969		-0.49053	-0.77207		0.48097	0.39421
-0.25266	-0.90975		-0.49053	-0.77232		0.48097	0.39447
-0.25273	-0.90975		-0.49514	-0.77143		0.48563	0.39482
-0.28158	-0.92084		-0.49682	-0.77047		0.48737	0.39454
-0.28233	-0.92096		-0.49692	-0.76981		0.48754	0.39414
-0.28249	-0.92099		-0.49692	-0.76963		0.48754	0.39435
-0.28264	-0.92104		-0.50209	-0.77102		0.49266	0.39492
-0.28158	-0.92098		-0.50344	-0.7724		0.49406	0.39476
-0.31201	-0.9297		-0.50344	-0.77222		0.49406	0.39505
-0.31233	-0.9298		-0.50344	-0.77159		0.49406	0.39538
-0.31258	-0.92986		-0.50908	-0.77121		0.49937	0.3955
-0.31258	-0.92997		-0.50991	-0.77127		0.50021	0.3946
-0.31258	-0.92988		-0.50991	-0.77157		0.50021	0.3945
-0.34203	-0.93712		-0.51329	-0.7675		0.50466	0.39464
-0.34203	-0.93737		-0.51462	-0.76366		0.50644	0.39459
-0.34203	-0.93744		-0.5149	-0.76583		0.50663	0.39469
-0.34203	-0.93748		-0.5149	-0.76965		0.50663	0.39521
-0.34243	-0.93748		-0.52057	-0.7721		0.51171	0.39607
-0.37146	-0.9447		-0.52246	-0.77293		0.51322	0.39643
-0.37146	-0.94451		-0.52246	-0.77289		0.51322	0.39572
-0.37192	-0.94437		-0.52246	-0.77305		0.51322	0.39544
-0.37203	-0.94439		-0.52776	-0.77323		0.51892	0.39592
-0.37214	-0.94439		-0.5289	-0.77258		0.5201	0.39607
-0.40132	-0.95169		-0.5289	-0.77231		0.5201	0.39624
-0.40153	-0.95146		-0.5289	-0.77237		0.52422	0.39625
-0.40174	-0.95133		-0.53473	-0.77259		0.52598	0.39643
-0.40194	-0.95126		-0.53555	-0.77407		0.5267	0.39615
-0.4012	-0.95125		-0.53555	-0.77553		0.5267	0.39595
-0.43101	-0.95542		-0.5399	-0.77589		0.53101	0.39605
-0.43137	-0.95537		-0.54162	-0.77584		0.53267	0.39657
-0.43174	-0.9554		-0.54206	-0.7756		0.53292	0.39672
-0.43186	-0.95541		-0.54206	-0.7754		0.53292	0.39627
-0.43186	-0.95535		-0.54683	-0.77476		0.53792	0.39645
-0.46064	-0.96036		-0.54857	-0.77426		0.53967	0.39695
-0.46075	-0.96005		-0.54862	-0.77462		0.53973	0.39668
-0.46075	-0.95977		-0.54915	-0.77691		0.53973	0.39638
-0.46075	-0.95958		-0.56122	-0.7821		0.5451	0.39619
-0.46075	-0.95958		-0.56122	-0.77813		0.54653	0.39644
-0.49054	-0.9637		-0.56581	-0.77556		0.54652	0.39735
-0.49054	-0.96361		-0.56767	-0.77489		0.54652	0.39772
-0.49054	-0.96355		-0.56807	-0.77601		0.55197	0.39747
-0.49082	-0.96359		-0.56807	-0.77677		0.55296	0.39695
-0.49088	-0.9636		-0.57266	-0.77695		0.55296	0.39668
-0.52035	-0.96708		-0.57427	-0.77651		0.55745	0.39667
-0.52093	-0.96713		-0.57427	-0.77564		0.5593	0.39726
-0.52107	-0.96703		-0.57427	-0.77638		0.55987	0.3976
-0.52121	-0.96697		-0.57992	-0.77656		0.55987	0.39767
-0.52135	-0.96705		-0.58113	-0.77572		0.56453	0.39749
-0.55033	-0.97057		-0.58113	-0.77547		0.56626	0.39727
-0.55062	-0.97055		-0.58113	-0.77704		0.56642	0.39789
-0.55091	-0.97048		-0.58658	-0.77819		0.56642	0.39874
-0.55098	-0.97039		-0.58722	-0.77849		0.57133	0.39909
-0.55098	-0.97048		-0.58722	-0.77762		0.57268	0.39937
-0.58073	-0.97371		-0.59195	-0.77688		0.57268	0.3994
-0.58097	-0.97373		-0.59376	-0.77668		0.57268	0.39949
-0.58097	-0.97375		-0.59387	-0.77607		0.57837	0.39913
-0.58097	-0.9738		-0.59387	-0.77543		0.57948	0.39862
-0.58097	-0.9738		-0.59872	-0.77549		0.57948	0.39869
-0.61136	-0.97652		-0.60005	-0.77654		0.58382	0.39872
-0.61136	-0.97654		-0.60005	-0.77762		0.58564	0.39804
-0.61136	-0.97648		-0.60005	-0.77862		0.58625	0.39814
-0.61168	-0.97634		-0.6059	-0.77905		0.58625	0.39812
-0.61175	-0.97623		-0.60692	-0.77894		0.59096	0.39785
-0.64094	-0.9789		-0.60692	-0.77888		0.59272	0.39789
-0.64149	-0.97883		-0.60692	-0.77869		0.59294	0.39792
-0.64162	-0.97884		-0.61251	-0.77757		0.59294	0.39799
-0.64175	-0.97877		-0.61312	-0.77688		0.59787	0.39881
-0.64189	-0.97892		-0.61312	-0.77793		0.59944	0.39928
-0.67122	-0.98148		-0.61769	-0.77865		0.59944	0.39896
-0.67149	-0.98142		-0.61943	-0.7776		0.59944	0.39949
-0.67175	-0.98154		-0.61972	-0.77644		0.60485	0.39923
-0.67179	-0.98168		-0.61972	-0.77695		0.60613	0.39868
-0.67179	-0.98165		-0.62491	-0.77813		0.60613	0.39816
-0.70179	-0.98429		-0.62654	-0.77953		0.60613	0.39745
-0.70184	-0.98434		-0.62653	-0.78065		0.61214	0.39755
-0.70184	-0.98442		-0.62653	-0.78047		0.61305	0.39848
-0.70184	-0.98455		-0.63186	-0.77919		0.61305	0.39895
-0.70184	-0.98443		-0.6329	-0.77894		0.61738	0.39934
-0.73188	-0.98645		-0.6329	-0.78041		0.61911	0.39971
-0.73188	-0.98642		-0.63699	-0.78184		0.61956	0.39968
-0.73188	-0.98642		-0.6387	-0.78162		0.61956	0.39976
-0.73239	-0.98667		-0.63924	-0.78076		0.62418	0.40012
-0.7325	-0.98669		-0.63924	-0.78065		0.62582	0.39999
-0.76128	-0.98853		-0.64384	-0.78083		0.62582	0.40012
-0.76128	-0.9885		-0.64556	-0.78107		0.62582	0.39999
-0.76216	-0.98845		-0.64566	-0.78083		0.63107	0.39991
-0.76234	-0.98857		-0.64566	-0.78088		0.63228	0.40016
-0.76253	-0.98842		-0.65105	-0.78215		0.63228	0.40018
-0.79251	-0.99079		-0.65256	-0.78239		0.63228	0.39958
-0.79273	-0.99064		-0.65256	-0.78172		0.63832	0.3999
-0.79294	-0.99048		-0.65256	-0.78142		0.63921	0.40035
-0.79152	-0.99041		-0.65779	-0.78138		0.63921	0.39987
-0.79152	-0.9904		-0.65883	-0.78215		0.64337	0.39977
-0.82254	-0.99261		-0.65883	-0.78269		0.64502	0.39986
-0.82286	-0.99275		-0.65883	-0.7827		0.64529	0.40056
-0.82286	-0.9927		-0.66496	-0.78414		0.64529	0.40113
-0.82286	-0.99261		-0.66573	-0.78402		0.65033	0.40059
-0.82286	-0.99282		-0.66573	-0.78316		0.65193	0.40009
-0.85287	-0.99419		-0.67031	-0.78286		0.65193	0.40027
-0.85287	-0.99416		-0.67209	-0.78319		0.65193	0.40016
-0.85287	-0.99406		-0.67244	-0.78339		0.65762	0.39958
-0.85312	-0.99408		-0.67244	-0.78351		0.65892	0.39927
-0.85318	-0.99411		-0.6773	-0.78355		0.65892	0.39939
-0.88216	-0.99579		-0.67902	-0.78309		0.6628	0.39957
-0.88299	-0.99574		-0.67902	-0.78234		0.66448	0.40017
-0.8832	-0.99579		-0.67902	-0.78251		0.66512	0.40089
-0.88341	-0.99579		-0.68427	-0.78393		0.66512	0.40114
-0.88361	-0.99579		-0.68557	-0.78399		0.66975	0.401
-0.91244	-0.99751		-0.68557	-0.78255		0.67152	0.40048
-0.91269	-0.99758		-0.68557	-0.78177		0.67175	0.39997
-0.91295	-0.99749		-0.69111	-0.7815		0.67175	0.40005
-0.91117	-0.99754		-0.69191	-0.78229		0.67691	0.40094
-0.91117	-0.99744		-0.69192	-0.78318		0.67856	0.40186
-0.94206	-0.99861		-0.69636	-0.78334		0.67856	0.40142
-0.94233	-0.99872		-0.69811	-0.78425		0.67856	0.40145
-0.94233	-0.99882		-0.69855	-0.7853		0.68375	0.40201
-0.94233	-0.99886		-0.69855	-0.78582		0.68488	0.40162
-0.94233	-0.99876		-0.70348	-0.78601		0.68488	0.40099
-0.97068	-1.0004		-0.70509	-0.78505		0.68488	0.40151
-0.97068	-1.00034		-0.70509	-0.7838		0.69067	0.40204
-0.97068	-1.00031		-0.70509	-0.78363		0.69154	0.40201
-0.97137	-1.00013		-0.71009	-0.78427		0.69153	0.40137
-0.97152	-1.00007		-0.71116	-0.78413		0.69601	0.40095
-0.9988	-1.00209		-0.71116	-0.78322		0.6978	0.40139
-0.99967	-1.00222		-0.71116	-0.78283		0.69834	0.40225
-0.99986	-1.00214		-0.71693	-0.78321		0.69834	0.40217
-1.00005	-1.00218		-0.71758	-0.78472		0.70297	0.40247
-0.9988	-1.00218		-0.71758	-0.78549		0.70468	0.40255
-0.97175	-1.00091		-0.72215	-0.78575		0.70493	0.4021
-0.97161	-1.00073		-0.7239	-0.78521		0.70492	0.40181
-0.97147	-1.00052		-0.72418	-0.78435		0.70992	0.40163
-0.97133	-1.00037		-0.72418	-0.78443		0.7116	0.40149
-0.97241	-1.00028		-0.72945	-0.78471		0.7116	0.40127
-0.94247	-0.99907		-0.73118	-0.78473		0.7116	0.40089
-0.94225	-0.99882		-0.74415	-0.78217		0.7169	0.40122
-0.94204	-0.99866		-0.74502	-0.78566		0.71824	0.40191
-0.94201	-0.99849		-0.74502	-0.78719		0.71823	0.40226
-0.94201	-0.99842		-0.74962	-0.78619		0.71823	0.40254
-0.91202	-0.99744		-0.75139	-0.7852		0.7238	0.4028
-0.91196	-0.99739		-0.75167	-0.78554		0.72478	0.40287
-0.91196	-0.99733		-0.75167	-0.78615		0.72477	0.40282
-0.91196	-0.99741		-0.75633	-0.78683		0.7293	0.4025
-0.91196	-0.99747		-0.75784	-0.78765		0.73116	0.40269
-0.88267	-0.99634		-0.75784	-0.78667		0.73173	0.4021
-0.88267	-0.99626		-0.7611	-0.78693		0.73174	0.40189
-0.88267	-0.99606		-0.76328	-0.78656		0.73611	0.40238
-0.88267	-0.99599		-0.76436	-0.7859		0.73773	0.40283
-0.88243	-0.99587		-0.76436	-0.7871		0.73782	0.40313
-0.85272	-0.99399		-0.76436	-0.78844		0.73782	0.40324
-0.85272	-0.99389		-0.77045	-0.78925		0.74328	0.40312
-0.85234	-0.99387		-0.77113	-0.78969		0.74495	0.40303
-0.85226	-0.99412		-0.77113	-0.78989		0.74495	0.40355
-0.85218	-0.99405		-0.7756	-0.79058		0.74495	0.40392
-0.8221	-0.99245		-0.7773	-0.791		0.75006	0.40343
-0.82187	-0.99245		-0.77755	-0.78997		0.75112	0.40375
-0.82164	-0.99245		-0.77755	-0.78903		0.75112	0.40359
-0.82317	-0.99244		-0.78249	-0.78955		0.75526	0.40332
-0.82317	-0.99241		-0.784	-0.78914		0.75703	0.40331
-0.79178	-0.99065		-0.784	-0.78853		0.75772	0.40286
-0.79157	-0.99059		-0.784	-0.78867		0.75772	0.40219
-0.79157	-0.99045		-0.78948	-0.78948		0.7623	0.40171
-0.79157	-0.99021		-0.79037	-0.79049		0.76406	0.40189
-0.79157	-0.99018		-0.79037	-0.79116		0.76424	0.40189
-0.76128	-0.98862		-0.79441	-0.79132		0.76424	0.40128
-0.76128	-0.98865		-0.79602	-0.79079		0.76953	0.40182
-0.76128	-0.98871		-0.79641	-0.78883		0.77121	0.4027
-0.76128	-0.9887		-0.79641	-0.78788		0.77121	0.40323
-0.76097	-0.98849		-0.8014	-0.78825		0.77121	0.40323
-0.73113	-0.98621		-0.80307	-0.78946		0.77656	0.40311
-0.73113	-0.98607		-0.80307	-0.79035		0.7778	0.40266
-0.73113	-0.98603		-0.80307	-0.79014		0.7778	0.40285
-0.73072	-0.98598		-0.8081	-0.78883		0.7778	0.40368
-0.73062	-0.98577		-0.80916	-0.78852		0.7832	0.40341
-0.70132	-0.98385		-0.80916	-0.78985		0.78416	0.40325
-0.70076	-0.9838		-0.80916	-0.79103		0.78416	0.40374
-0.70063	-0.98367		-0.81503	-0.79178		0.78834	0.40404
-0.7005	-0.98358		-0.81585	-0.79154		0.79006	0.40404
-0.70037	-0.98362		-0.81585	-0.79094		0.79069	0.4035
-0.67049	-0.98184		-0.82044	-0.79144		0.79069	0.40251
-0.67025	-0.98192		-0.82225	-0.7918		0.79528	0.40215
-0.67002	-0.98183		-0.8228	-0.79118		0.79701	0.40259
-0.6717	-0.98171		-0.8228	-0.79194		0.79731	0.40379
-0.6717	-0.98149		-0.82735	-0.79175		0.79731	0.40488
-0.64042	-0.97876		-0.829	-0.79141		0.80222	0.40431
-0.64001	-0.97881		-0.829	-0.79204		0.80394	0.40334
-0.63978	-0.97889		-0.829	-0.7921		0.80394	0.40383
-0.63978	-0.97887		-0.83413	-0.79163		0.80395	0.40414
-0.63978	-0.97887		-0.83547	-0.79144		0.80945	0.40418
-0.61012	-0.97653		-0.83547	-0.79006		0.81088	0.40394
-0.60979	-0.97648		-0.83547	-0.78906		0.81088	0.404
-0.60979	-0.97637		-0.84117	-0.78922		0.81088	0.40423
-0.60979	-0.97637		-0.84216	-0.78839		0.81606	0.40485
-0.60979	-0.97644		-0.84216	-0.78798		0.81705	0.40507
-0.5793	-0.97404		-0.84629	-0.78943		0.81705	0.40518
-0.5793	-0.97394		-0.84799	-0.78869		0.82141	0.40513
-0.5793	-0.9737		-0.84848	-0.78846		0.82324	0.40413
-0.5793	-0.97345		-0.84848	-0.78871		0.82381	0.40388
-0.57923	-0.97335		-0.85312	-0.78912		0.82381	0.40343
-0.54974	-0.97045		-0.85483	-0.78954		0.82849	0.40294
-0.54974	-0.97037		-0.85483	-0.78843		0.8302	0.40253
-0.54928	-0.97025		-0.85483	-0.7871		0.8302	0.40299
-0.54917	-0.97022		-0.86016	-0.78779		0.8302	0.40268
-0.54907	-0.96998		-0.86157	-0.78977		0.83544	0.40205
-0.51936	-0.96701		-0.86157	-0.79057		0.83651	0.40244
-0.51924	-0.96703		-0.86157	-0.7886		0.83651	0.40333
-0.51912	-0.96692		-0.86713	-0.78626		0.84039	0.40383
-0.519	-0.96681		-0.86813	-0.78546		0.84202	0.40382
-0.51985	-0.96688		-0.86813	-0.78747		0.84271	0.40424
-0.48959	-0.96377		-0.86813	-0.78953		0.84271	0.40478
-0.48926	-0.96357		-0.87391	-0.7904		0.84739	0.40457
-0.48892	-0.96344		-0.87451	-0.7901		0.84921	0.40426
-0.48878	-0.96341		-0.87451	-0.79042		0.84951	0.40417
-0.48878	-0.96326		-0.87896	-0.7913		0.84951	0.40422
-0.45945	-0.95951		-0.88064	-0.79189		0.85406	0.40396
-0.45904	-0.95929		-0.88082	-0.79138		0.85549	0.40358
-0.45895	-0.9591		-0.88082	-0.79066		0.85549	0.40348
-0.45895	-0.95901		-0.8858	-0.7907		0.85549	0.40384
-0.45895	-0.95907		-0.88723	-0.79054		0.8608	0.40512
-0.42953	-0.95502		-0.88724	-0.79039		0.86198	0.40518
-0.42932	-0.95504		-0.88724	-0.78957		0.86198	0.40433
-0.42932	-0.95495		-0.89278	-0.78894		0.86604	0.4036
-0.42932	-0.95482		-0.89382	-0.78913		0.86779	0.40364
-0.42932	-0.95467		-0.89382	-0.78735		0.86854	0.40363
-0.39951	-0.95011		-0.89795	-0.78559		0.86854	0.40352
-0.39951	-0.95006		-0.89967	-0.7866		0.8729	0.40373
-0.39951	-0.94985		-0.90021	-0.78815		0.8746	0.40458
-0.39951	-0.94969		-0.90021	-0.78906		0.87528	0.40494
-0.39912	-0.94967		-0.90462	-0.78983		0.87528	0.40475
-0.36945	-0.94423		-0.90627	-0.7906		0.87967	0.4045
-0.36945	-0.94397		-0.90639	-0.79176		0.88136	0.40426
-0.36945	-0.94381		-0.90639	-0.79204		0.88167	0.40451
-0.3692	-0.94384		-0.91175	-0.79027		0.88167	0.40501
-0.36914	-0.94387		-0.9133	-0.78929		0.88677	0.40486
-0.34006	-0.93787		-0.91331	-0.79094		0.88848	0.4041
-0.34006	-0.93762		-0.9133	-0.79204		0.88847	0.40447
-0.33947	-0.93742		-0.91864	-0.79237		0.88847	0.40555
-0.33934	-0.93739		-0.91972	-0.79202		0.89361	0.40589
-0.33921	-0.93736		-0.91972	-0.79093		0.89465	0.40557
-0.30981	-0.93038		-0.91972	-0.78962		0.89465	0.40569
-0.30963	-0.93042		-0.9255	-0.78955		0.89863	0.40566
-0.30945	-0.93037		-0.92622	-0.79031		0.9003	0.40543
-0.30926	-0.93021		-0.92622	-0.79052		0.90096	0.40543
-0.31059	-0.93001		-0.93033	-0.79102		0.90096	0.40383
-0.2801	-0.9212		-0.93193	-0.79178		0.90519	0.40373
-0.2798	-0.92093		-0.93228	-0.79149		0.90681	0.40397
-0.2795	-0.92074		-0.93228	-0.7906		0.90712	0.40399
-0.28158	-0.92062		-0.93698	-0.78927		0.90712	0.40387
-0.28158	-0.92048		-0.93848	-0.78898		0.91204	0.40462
-0.25011	-0.91012		-0.93848	-0.78974		0.91372	0.40505
-0.24974	-0.90993		-0.93848	-0.79052		0.91372	0.40495
-0.24964	-0.90981		-0.94376	-0.79021		0.91372	0.40542
-0.24964	-0.90971		-0.94491	-0.78949		0.91864	0.40567
-0.24964	-0.90963		-0.94491	-0.78996		0.91984	0.40548
-0.21967	-0.89634		-0.9449	-0.79038		0.91983	0.40518
-0.21945	-0.89604		-0.9505	-0.79062		0.91983	0.40453
-0.21945	-0.89574		-0.95109	-0.78907		0.9256	0.40501
-0.21945	-0.89559		-0.95109	-0.78923		0.9267	0.40547
-0.21945	-0.89533		-0.9558	-0.79123		0.9267	0.40538
-0.18973	-0.87822		-0.95758	-0.79196		0.93067	0.40447
-0.18973	-0.87797		-0.95771	-0.79176		0.93234	0.40385
-0.18955	-0.87788		-0.95771	-0.79185		0.93294	0.40408
-0.1895	-0.87764		-0.96262	-0.791		0.93294	0.40554
-0.18945	-0.87747		-0.96414	-0.79134		0.93717	0.40653
-0.16072	-0.85508		-0.96414	-0.79304		0.93878	0.40617
-0.1599	-0.8546		-0.96414	-0.79342		0.93909	0.40575
-0.15969	-0.85408		-0.96909	-0.79319		0.93909	0.40555
-0.15949	-0.85375		-0.97027	-0.79261		0.94412	0.40583
-0.15928	-0.85364		-0.97027	-0.79146		0.9459	0.40657
-0.13073	-0.82261		-0.97027	-0.79109		0.9459	0.40678
-0.12995	-0.82169		-0.97551	-0.79192		0.9459	0.4062
-0.12979	-0.82104		-0.97637	-0.79274		0.95083	0.4054
-0.12963	-0.82059		-0.97638	-0.79302		0.95196	0.40558
-0.13073	-0.82033		-0.97638	-0.79356		0.95196	0.40582
-0.09979	-0.76971		-0.98247	-0.7934		0.95196	0.40593
-0.09955	-0.76885		-0.98307	-0.7931		0.95735	0.40634
-0.09934	-0.7682		-0.98307	-0.79535		0.95812	0.40607
-0.09934	-0.7677		-0.98833	-0.79688		0.95812	0.40561
-0.09934	-0.76713		-0.9903	-0.79703		0.96251	0.40559
-0.08945	-0.7448		-0.99055	-0.79831		0.96425	0.40587
-0.08934	-0.7442		-0.99055	-0.79883		0.96467	0.40623
-0.08931	-0.7437		-0.99229	-0.79649		0.96466	0.40659
-0.08928	-0.74341		-0.99284	-0.79419		0.96896	0.40624
-0.08925	-0.74314		-0.99284	-0.79443		0.97052	0.406
-0.07906	-0.71701		-0.99284	-0.79412		0.97054	0.40641
-0.07906	-0.71625		-0.99263	-0.7925		0.97054	0.40607
-0.07906	-0.71559		-0.99259	-0.79212		0.97559	0.40554
-0.07884	-0.71498		-0.99259	-0.79226		0.97687	0.40539
-0.07878	-0.71453		-0.99048	-0.79136		0.97687	0.40469
-0.06896	-0.68164		-0.9896	-0.79089		0.97687	0.40404
-0.06896	-0.68099		-0.98933	-0.7907		0.98413	0.40443
-0.06896	-0.68051		-0.98933	-0.7905		0.98521	0.40553
-0.06896	-0.68018		-0.98504	-0.7931		0.98522	0.40623
-0.06896	-0.67993		-0.98345	-0.79647		0.99307	0.4064
-0.05927	-0.64115		-0.98332	-0.79723		0.99619	0.40681
-0.05917	-0.6401		-0.98332	-0.79491		0.99676	0.40733
-0.05907	-0.63934		-0.97893	-0.79394		0.99676	0.4064
-0.05907	-0.63879		-0.97779	-0.79364		1.00464	0.40529
-0.05907	-0.63821		-0.97779	-0.79292		1.00701	0.40575
-0.04964	-0.58808		-0.97779	-0.79381		1.00701	0.40636
-0.04904	-0.58663		-0.97232	-0.79418		1.00701	0.40674
-0.04891	-0.58549		-0.97127	-0.7935		1.00863	0.40664
-0.04878	-0.58464		-0.97127	-0.79358		1.00892	0.4063
-0.04964	-0.58402		-0.97127	-0.79507		1.00892	0.40584
-0.03869	-0.51852		-0.96561	-0.79615		1.009	0.40612
-0.03869	-0.51659		-0.965	-0.7964		1.00903	0.4066
-0.03869	-0.51503		-0.965	-0.79524		1.00905	0.40653
-0.03838	-0.51389		-0.96052	-0.79319		1.00905	0.40594
-0.03832	-0.51299		-0.95883	-0.79133		1.0068	0.4063
-0.02915	-0.43286		-0.95863	-0.79189		1.00595	0.40703
-0.02903	-0.43022		-0.95863	-0.79246		1.00581	0.40747
-0.02903	-0.42802		-0.95373	-0.79121		1.00581	0.40717
-0.02903	-0.42636		-0.95215	-0.79159		1.00082	0.40686
-0.02903	-0.42507		-0.95215	-0.79094		0.99925	0.4072
-0.01878	-0.31229		-0.95215	-0.79001		0.99925	0.40753
-0.01856	-0.30932		-0.94676	-0.79023		0.99925	0.40767
-0.01851	-0.30696		-0.94563	-0.7898		0.99018	0.40711
-0.01851	-0.30511		-0.94563	-0.7892		0.98835	0.40593
-0.01851	-0.30361		-0.94563	-0.78892		0.98835	0.40526
-0.00918	-0.16266		-0.9401	-0.78896		0.98177	0.4053
-0.00904	-0.15799		-0.93949	-0.79019		0.979	0.40566
-0.00892	-0.15425		-0.93949	-0.79121		0.97784	0.40605
-0.00892	-0.15115		-0.93499	-0.79027		0.97784	0.40636
-0.00892	-0.14881		-0.93328	-0.78916		0.97358	0.40556
0.00054089	0.01967		-0.93307	-0.78952		0.97193	0.40493
0.000689842	0.02485		-0.93308	-0.7886		0.97158	0.40502
0.000839093	0.02893		-0.92787	-0.78648		0.97158	0.40578
-0.00016913	0.03218		-0.92623	-0.78603		0.96688	0.40587
-0.00016913	0.0348		-0.92623	-0.78732		0.96538	0.40511
0.01046	0.20601		-0.92623	-0.78939		0.96538	0.40414
0.01062	0.20977		-0.92107	-0.79078		0.96538	0.40394
0.01062	0.21274		-0.91995	-0.7905		0.96016	0.40398
0.01062	0.21515		-0.91995	-0.78941		0.95911	0.40422
0.01062	0.21704		-0.91995	-0.78883		0.95911	0.40537
0.02067	0.34975		-0.91395	-0.78977		0.95517	0.40654
0.02087	0.35257		-0.91316	-0.79117		0.95351	0.40701
0.02087	0.3548		-0.91316	-0.79235		0.95287	0.40702
0.02087	0.3566		-0.90895	-0.79169		0.95287	0.40694
0.02087	0.3581		-0.90731	-0.79068		0.94858	0.40674
0.03061	0.45869		-0.90688	-0.79095		0.94694	0.40646
0.03083	0.46071		-0.90688	-0.79057		0.94666	0.4062
0.03083	0.46239		-0.9022	-0.79117		0.94666	0.40605
0.03083	0.4638		-0.90049	-0.79162		0.94194	0.4058
0.03083	0.46492		-0.90034	-0.78987		0.94051	0.40504
0.04041	0.54001		-0.90034	-0.78865		0.9405	0.40507
0.04057	0.54162		-0.89509	-0.78882		0.9405	0.40565
0.04072	0.54282		-0.8937	-0.78835		0.93498	0.40561
0.04074	0.5438		-0.8937	-0.78724		0.93383	0.40495
0.04074	0.54459		-0.8937	-0.78718		0.93383	0.40484
0.05104	0.6059		-0.88803	-0.78749		0.93383	0.40518
0.05119	0.60701		-0.88713	-0.78789		0.92807	0.40593
0.05134	0.60784		-0.88713	-0.78848		0.92732	0.40636
0.05149	0.60852		-0.88308	-0.78859		0.92732	0.40535
0.0504	0.60915		-0.88145	-0.7893		0.92325	0.40449
0.06136	0.65614		-0.88111	-0.7906		0.92166	0.40406
0.06136	0.65696		-0.88111	-0.79074		0.92135	0.40355
0.06155	0.65755		-0.87635	-0.79104		0.92135	0.40357
0.06159	0.6581		-0.87464	-0.79064		0.91647	0.40405
0.06163	0.65847		-0.8745	-0.78972		0.91473	0.4043
0.07137	0.69381		-0.8745	-0.79004		0.91473	0.40421
0.07137	0.69461		-0.86911	-0.79079		0.91472	0.40407
0.07137	0.69522		-0.86744	-0.79096		0.90953	0.40435
0.07137	0.69577		-0.86744	-0.79147		0.90806	0.40475
0.07161	0.69618		-0.86744	-0.79249		0.90806	0.40467
0.08137	0.72612		-0.86235	-0.79187		0.90806	0.40474
0.08143	0.72666		-0.86121	-0.79178		0.90282	0.40454
0.08143	0.72705		-0.86121	-0.79282		0.90186	0.40473
0.08143	0.72737		-0.86121	-0.79307		0.90186	0.40527
0.08143	0.7277		-0.85506	-0.79238		0.89779	0.40531
0.09139	0.75228		-0.85413	-0.79107		0.89611	0.40519
0.09157	0.75288		-0.85413	-0.79071		0.8957	0.40454
0.09175	0.75331		-0.84988	-0.79171		0.8957	0.40434
0.09182	0.75366		-0.84818	-0.79264		0.89112	0.40524
0.09182	0.75395		-0.84766	-0.79306		0.88946	0.40535
0.10147	0.77469		-0.84766	-0.79359		0.88934	0.40467
0.10154	0.77492		-0.84305	-0.79379		0.88934	0.40455
0.10161	0.77535		-0.84134	-0.794		0.88431	0.40452
0.10167	0.77557		-0.84129	-0.79493		0.88297	0.40433
0.10119	0.7757		-0.84129	-0.79476		0.88297	0.40487
0.10182	0.7763		-0.83622	-0.79426		0.88297	0.40591
0.10182	0.7763		-0.83491	-0.79382		0.87746	0.40627
0.10187	0.77636		-0.83491	-0.7927		0.87665	0.40572
0.10189	0.77642		-0.83491	-0.79197		0.87665	0.40483
0.1019	0.7764		-0.82896	-0.79305		0.87239	0.40432
0.13139	0.82163		-0.82817	-0.79426		0.8707	0.40431
0.13161	0.82226		-0.82817	-0.79462		0.87018	0.4042
0.13184	0.82266		-0.82358	-0.79454		0.87018	0.40378
0.13041	0.82289		-0.82179	-0.79438		0.86549	0.40463
0.13041	0.82306		-0.82146	-0.79304		0.86375	0.40563
0.16082	0.8537		-0.82146	-0.79194		0.86365	0.405
0.1612	0.85423		-0.81692	-0.79118		0.86365	0.40403
0.16159	0.85469		-0.81547	-0.79075		0.85837	0.40456
0.16165	0.85488		-0.81547	-0.79166		0.85692	0.40453
0.16165	0.85506		-0.81547	-0.79159		0.85693	0.40322
0.19123	0.87847		-0.80968	-0.79136		0.85692	0.4024
0.19123	0.87828		-0.80844	-0.79165		0.85176	0.40272
0.19123	0.87824		-0.80843	-0.79189		0.85078	0.40322
0.19123	0.87827		-0.80843	-0.79235		0.85078	0.40296
0.19141	0.87844		-0.80294	-0.79255		0.84657	0.40295
0.22092	0.89528		-0.80208	-0.79227		0.84481	0.40316
0.22092	0.89547		-0.80208	-0.79201		0.84414	0.40317
0.22131	0.89552		-0.79755	-0.79215		0.84414	0.40323
0.2214	0.89563		-0.79572	-0.79234		0.83961	0.40312
0.22148	0.89569		-0.79543	-0.79124		0.83788	0.40333
0.25077	0.90849		-0.79543	-0.79149		0.83763	0.40345
0.25095	0.90864		-0.79075	-0.79222		0.83763	0.40355
0.25114	0.9088		-0.78931	-0.79097		0.83279	0.40331
0.25132	0.90892		-0.78931	-0.79097		0.83117	0.4031
0.25001	0.909		-0.78931	-0.79169		0.83117	0.40307
0.28093	0.92024		-0.78388	-0.7923		0.83117	0.40308
0.28123	0.92032		-0.78279	-0.7934		0.82566	0.40324
0.28136	0.92034		-0.7828	-0.7938		0.82443	0.40335
0.28136	0.92026		-0.7828	-0.79226		0.82443	0.40343
0.28136	0.9203		-0.77651	-0.79101		0.82443	0.40306
0.31111	0.9293		-0.77563	-0.79083		0.8186	0.40289
0.31111	0.92947		-0.77562	-0.79005		0.81779	0.40304
0.31111	0.92947		-0.77123	-0.78986		0.81779	0.40355
0.31111	0.92945		-0.76949	-0.79119		0.81367	0.40387
0.3115	0.92947		-0.76908	-0.79087		0.81205	0.40407
0.34077	0.93703		-0.76908	-0.78868		0.81176	0.40435
0.34077	0.93724		-0.76418	-0.78877		0.81175	0.40434
0.34141	0.93733		-0.7624	-0.79019		0.8069	0.40353
0.34155	0.93737		-0.76232	-0.7909		0.80533	0.40362
0.3417	0.93737		-0.75932	-0.79089		0.80533	0.40399
0.37049	0.94365		-0.75751	-0.78837		0.80533	0.40385
0.37132	0.94376		-0.75632	-0.78668		0.79975	0.40326
0.37149	0.94384		-0.75632	-0.78756		0.79849	0.40308
0.37165	0.94382		-0.75632	-0.78847		0.79848	0.40282
0.37049	0.94379		-0.75044	-0.78977		0.79849	0.40297
0.40083	0.9492		-0.74977	-0.78994		0.79272	0.40358
0.40119	0.9494		-0.74977	-0.78883		0.79192	0.40441
0.4014	0.94942		-0.74506	-0.78889		0.79192	0.40467
0.4014	0.94949		-0.74326	-0.78955		0.78777	0.40356
0.4014	0.94957		-0.74311	-0.78857		0.78614	0.4021
0.43137	0.95449		-0.74311	-0.78789		0.78575	0.40176
0.43137	0.9546		-0.73801	-0.78849		0.78575	0.40259
0.43137	0.9546		-0.7366	-0.78997		0.78074	0.40339
0.43137	0.95464		-0.7366	-0.78984		0.77892	0.40346
0.43156	0.95467		-0.7366	-0.78874		0.77885	0.40309
0.46042	0.95862		-0.73102	-0.7883		0.77885	0.40305
0.46042	0.95867		-0.72975	-0.78801		0.7736	0.40271
0.46075	0.95867		-0.72975	-0.78804		0.77218	0.40245
0.46083	0.95869		-0.72975	-0.78911		0.77218	0.40331
0.46091	0.9587		-0.72396	-0.78948		0.77218	0.40402
0.49063	0.96257		-0.72313	-0.78928		0.76656	0.40372
0.49076	0.96249		-0.72313	-0.78852		0.76548	0.40307
0.4909	0.96245		-0.71893	-0.78835		0.76548	0.40332
0.49002	0.9625		-0.71728	-0.79001		0.7613	0.40366
0.49002	0.9625		-0.71684	-0.79121		0.75955	0.404
0.5207	0.96623		-0.71684	-0.79036		0.75888	0.40402
0.52107	0.96634		-0.71204	-0.78931		0.75888	0.4039
0.52107	0.96641		-0.71029	-0.78913		0.75449	0.40401
0.52107	0.96638		-0.71021	-0.79015		0.75281	0.40434
0.52107	0.96632		-0.71021	-0.79036		0.75257	0.40357
0.55076	0.96972		-0.70498	-0.78928		0.75257	0.40303
0.55076	0.96986		-0.70349	-0.78851		0.74746	0.40352
0.55076	0.96982		-0.70349	-0.78971		0.74586	0.4036
0.55099	0.96978		-0.70349	-0.79048		0.74586	0.40307
0.55105	0.96963		-0.69808	-0.78974		0.74586	0.40277
0.58052	0.973		-0.69708	-0.7897		0.74037	0.40282
0.58052	0.97282		-0.69708	-0.78978		0.73937	0.40278
0.5811	0.97273		-0.69708	-0.79072		0.73937	0.40269
0.58122	0.97276		-0.69109	-0.79193		0.7353	0.40256
0.58133	0.97269		-0.69044	-0.79014		0.73362	0.40247
0.61071	0.97565		-0.69044	-0.78731		0.73324	0.40215
0.61099	0.97557		-0.68574	-0.7867		0.73324	0.40144
0.61126	0.97544		-0.68396	-0.78697		0.72819	0.40126
0.60938	0.97541		-0.68372	-0.78739		0.72649	0.40167
0.60938	0.97553		-0.68372	-0.78911		0.72649	0.40121
0.64108	0.97916		-0.67849	-0.78989		0.72649	0.40086
0.64139	0.97912		-0.67678	-0.78881		0.72125	0.40122
0.64139	0.97906		-0.67678	-0.78887		0.72008	0.40125
0.64139	0.97908		-0.67678	-0.78994		0.72008	0.40075
0.64139	0.97909		-0.67148	-0.79051		0.72008	0.40069
0.67114	0.98144		-0.67037	-0.79074		0.71458	0.40084
0.67114	0.98155		-0.67037	-0.79023		0.71384	0.40173
0.67114	0.98145		-0.67037	-0.78961		0.71384	0.40202
0.67114	0.98123		-0.66486	-0.78897		0.70932	0.40194
0.67134	0.98111		-0.66425	-0.78889		0.70755	0.40211
0.70063	0.98331		-0.66425	-0.78854		0.70713	0.40179
0.70063	0.98332		-0.65965	-0.78831		0.70713	0.40139
0.70119	0.98337		-0.6579	-0.78858		0.70207	0.40155
0.70133	0.98325		-0.65765	-0.78908		0.70028	0.40138
0.70147	0.98315		-0.65765	-0.78923		0.70028	0.40126
0.73035	0.98505		-0.65242	-0.78856		0.70028	0.40168
0.73059	0.98509		-0.65074	-0.78787		0.69523	0.40228
0.73083	0.98526		-0.65074	-0.78787		0.69399	0.40186
0.73107	0.98539		-0.65074	-0.78805		0.69399	0.40144
0.72931	0.98539		-0.64546	-0.78797		0.69399	0.40148
0.76026	0.98775		-0.64432	-0.78785		0.68816	0.40146
0.76064	0.98774		-0.64432	-0.78777		0.68735	0.40201
0.76089	0.98771		-0.64432	-0.78782		0.68735	0.40205
0.76089	0.98776		-0.63825	-0.78915		0.68279	0.40177
0.76089	0.98772		-0.63733	-0.79039		0.681	0.4011
0.79003	0.98933		-0.63732	-0.79017		0.68058	0.40068
0.79033	0.98943		-0.63304	-0.78904		0.68058	0.40102
0.79033	0.98936		-0.63133	-0.78795		0.67591	0.4014
0.79033	0.98951		-0.6309	-0.78858		0.67422	0.40152
0.79033	0.98964		-0.6309	-0.78907		0.67416	0.40138
0.81958	0.99101		-0.62614	-0.78949		0.67416	0.40111
0.81958	0.9911		-0.62462	-0.78984		0.6687	0.40062
0.81958	0.99125		-0.62462	-0.79026		0.66734	0.40059
0.82013	0.99124		-0.62462	-0.79004		0.66734	0.40112
0.82025	0.99123		-0.61939	-0.78987		0.66734	0.40072
0.8488	0.99285		-0.61835	-0.78991		0.66197	0.40112
0.8494	0.99285		-0.61835	-0.7897		0.66123	0.40119
0.84955	0.99291		-0.61835	-0.78964		0.66122	0.40059
0.84969	0.99313		-0.61214	-0.78868		0.65657	0.39998
0.84983	0.99321		-0.61139	-0.78807		0.65475	0.39984
0.87839	0.99433		-0.61139	-0.7881		0.65441	0.40054
0.87866	0.99436		-0.60683	-0.78776		0.65441	0.40088
0.87894	0.99444		-0.60508	-0.78655		0.64964	0.40123
0.87899	0.99453		-0.60479	-0.78678		0.64803	0.40196
0.87899	0.99443		-0.60479	-0.78856		0.64803	0.40153
0.90721	0.99539		-0.60021	-0.7893		0.64803	0.4011
0.90732	0.99541		-0.59872	-0.78737		0.64264	0.40024
0.90732	0.99535		-0.59872	-0.7867		0.64158	0.39974
0.90732	0.99526		-0.59872	-0.78786		0.64158	0.39912
0.90732	0.99529		-0.59335	-0.78887		0.63719	0.39887
0.93622	0.99595		-0.5922	-0.78863		0.63537	0.39925
0.93622	0.99607		-0.5922	-0.78876		0.63487	0.39914
0.93622	0.99609		-0.5922	-0.78827		0.63487	0.39903
0.93638	0.99596		-0.58623	-0.78784		0.63022	0.39928
0.93642	0.99601		-0.58559	-0.78697		0.62852	0.39956
0.96377	0.99619		-0.58559	-0.78655		0.62848	0.39968
0.96467	0.9961		-0.58081	-0.7871		0.62848	0.39958
0.96486	0.99613		-0.579	-0.78721		0.62337	0.39963
0.96506	0.99608		-0.57884	-0.78627		0.62212	0.39979
0.96525	0.99606		-0.57884	-0.78614		0.62212	0.39981
1.00204	0.99713		-0.57376	-0.78724		0.62212	0.39931
1.00235	0.997		-0.57231	-0.78815		0.61619	0.39877
1.00259	0.99695		-0.57231	-0.78801		0.61528	0.39896
1.00259	0.99702		-0.56917	-0.78664		0.61528	0.39946
1.00259	0.99685		-0.56708	-0.78489		0.61086	0.39975
			-0.56603	-0.7853		0.60908	0.39997
			-0.56603	-0.78667		0.60862	0.39994
			-0.56603	-0.78525		0.60862	0.39971
			-0.55993	-0.78465		0.604	0.39951
			-0.55908	-0.78487		0.60232	0.39909
			-0.55908	-0.78471		0.60228	0.39906
			-0.55462	-0.78398		0.60229	0.39929
			-0.55285	-0.78324		0.59692	0.39914
			-0.55249	-0.78245		0.59555	0.39943
			-0.55249	-0.78221		0.59555	0.39969
			-0.54759	-0.78293		0.59555	0.39919
			-0.54583	-0.7835		0.58997	0.39892
			-0.54571	-0.78383		0.58915	0.39925
			-0.54571	-0.78335		0.58915	0.39903
			-0.54071	-0.78308		0.58455	0.39858
			-0.53937	-0.7829		0.58272	0.39875
			-0.53938	-0.7824		0.5822	0.39909
			-0.53937	-0.78215		0.5822	0.39918
			-0.53396	-0.78155		0.5776	0.39915
			-0.53302	-0.7815		0.57591	0.39866
			-0.53302	-0.78105		0.57591	0.3979
			-0.52883	-0.78087		0.57591	0.39775
			-0.52712	-0.78126		0.5704	0.3979
			-0.52665	-0.7807		0.56897	0.39806
			-0.52665	-0.78027		0.56897	0.3978
			-0.52196	-0.78148		0.56897	0.39727
			-0.52027	-0.78152		0.5632	0.39722
			-0.52027	-0.78086		0.5623	0.3976
			-0.52028	-0.78061		0.5623	0.39758
			-0.51478	-0.78184		0.55797	0.39726
			-0.51345	-0.78207		0.55623	0.39716
			-0.51345	-0.7813		0.55575	0.39743
			-0.51345	-0.77962		0.55575	0.39708
			-0.50782	-0.77893		0.55087	0.397
			-0.50705	-0.77886		0.54913	0.397
			-0.50705	-0.77823		0.54913	0.39696
			-0.50279	-0.77771		0.54913	0.39709
			-0.50113	-0.77674		0.5441	0.39727
			-0.5007	-0.7767		0.54283	0.39662
			-0.5007	-0.77809		0.54283	0.3961
			-0.49602	-0.7789		0.54283	0.39632
			-0.49432	-0.77911		0.53721	0.39717
			-0.49425	-0.77893		0.53635	0.39751
			-0.49425	-0.7789		0.53635	0.39712
			-0.48898	-0.77781		0.5319	0.39685
			-0.48745	-0.77655		0.53012	0.39709
			-0.48745	-0.77634		0.52969	0.39759
			-0.48745	-0.7762		0.52969	0.39726
			-0.48184	-0.77574		0.52467	0.3966
			-0.48083	-0.77614		0.52285	0.39577
			-0.48083	-0.77732		0.52278	0.39558
			-0.47663	-0.77828		0.52278	0.39573
			-0.47491	-0.77873		0.51747	0.39567
			-0.47444	-0.77889		0.51596	0.39558
			-0.47444	-0.77726		0.51596	0.39584
			-0.46976	-0.77643		0.51596	0.396
			-0.46807	-0.77762		0.51053	0.39588
			-0.46807	-0.77863		0.50947	0.39585
			-0.46807	-0.77869		0.50947	0.39579
			-0.46303	-0.77891		0.50528	0.3953
			-0.46175	-0.77893		0.50352	0.39507
			-0.46175	-0.77872		0.50296	0.39545
			-0.46175	-0.77903		0.50296	0.39569
			-0.45587	-0.77892		0.49824	0.39568
			-0.45495	-0.77811		0.49649	0.39527
			-0.45495	-0.77716		0.49641	0.39459
			-0.45062	-0.77651		0.49641	0.39464
			-0.44889	-0.77604		0.49141	0.39509
			-0.44834	-0.77534		0.49014	0.39516
			-0.44834	-0.77543		0.49014	0.39456
			-0.44372	-0.77583		0.49014	0.39437
			-0.442	-0.77526		0.48436	0.39455
			-0.44176	-0.77534		0.48343	0.39471
			-0.44176	-0.77615		0.48343	0.39465
			-0.43681	-0.77652		0.47897	0.39404
			-0.43514	-0.77704		0.47717	0.39368
			-0.43514	-0.77634		0.47658	0.39349
			-0.43185	-0.77516		0.47658	0.39335
			-0.4299	-0.77443		0.47188	0.39323
			-0.42857	-0.77363		0.47012	0.39301
			-0.42856	-0.77207		0.47001	0.39311
			-0.42856	-0.77204		0.47001	0.39312
			-0.42307	-0.77288		0.46468	0.393
			-0.42214	-0.77285		0.46313	0.39292
			-0.42214	-0.77323		0.46313	0.39275
			-0.42214	-0.77315		0.46313	0.39296
			-0.41633	-0.77255		0.45768	0.39324
			-0.41576	-0.77143		0.45665	0.39324
			-0.41576	-0.77084		0.45665	0.39308
			-0.41105	-0.77078		0.45247	0.393
			-0.40928	-0.77167		0.45074	0.39235
			-0.40917	-0.77211		0.45008	0.39192
			-0.40917	-0.77141		0.45008	0.39204
			-0.40431	-0.771		0.44533	0.3921
			-0.40277	-0.7713		0.44352	0.3921
			-0.40277	-0.77058		0.44332	0.39201
			-0.40277	-0.76933		0.44332	0.39221
			-0.39717	-0.76841		0.43829	0.39227
			-0.39591	-0.76821		0.43688	0.39241
			-0.39591	-0.76846		0.43688	0.39222
			-0.39591	-0.76835		0.43688	0.39227
			-0.39047	-0.76742		0.43149	0.39243
			-0.38961	-0.76821		0.43053	0.39235
			-0.38961	-0.76962		0.43054	0.39224
			-0.38961	-0.77009		0.42627	0.392
			-0.38363	-0.76912		0.42452	0.39171
			-0.38304	-0.76831		0.42414	0.39163
			-0.38304	-0.76719		0.42414	0.39152
			-0.37848	-0.76643		0.41898	0.39131
			-0.37676	-0.76548		0.41732	0.3912
			-0.37652	-0.76461		0.41732	0.39044
			-0.37652	-0.76538		0.41732	0.39006
			-0.37138	-0.76647		0.41208	0.39017
			-0.36982	-0.76613		0.41103	0.39002
			-0.36982	-0.76596		0.41103	0.39018
			-0.36982	-0.76567		0.40687	0.39054
			-0.36451	-0.76525		0.40512	0.39052
			-0.36348	-0.7653		0.40444	0.39007
			-0.36348	-0.76561		0.40444	0.38981
			-0.36348	-0.76588		0.39965	0.38964
			-0.35748	-0.76551		0.39781	0.38981
			-0.3568	-0.76487		0.39759	0.38965
			-0.3568	-0.76232		0.39759	0.39024
			-0.35255	-0.76054		0.39247	0.39033
			-0.35093	-0.76007		0.39087	0.38999
			-0.3505	-0.7601		0.39087	0.38955
			-0.3505	-0.75978		0.39087	0.3893
			-0.34554	-0.76004		0.38572	0.38904
			-0.34381	-0.76123		0.38465	0.38858
			-0.34381	-0.76163		0.38465	0.38834
			-0.34381	-0.76093		0.38044	0.38834
			-0.33877	-0.76023		0.37865	0.38837
			-0.33756	-0.75953		0.37792	0.38815
			-0.33756	-0.75921		0.37792	0.38799
			-0.33756	-0.75899		0.37323	0.38793
			-0.33165	-0.75866		0.37142	0.38771
			-0.33078	-0.75858		0.37105	0.38745
			-0.33078	-0.75778		0.37105	0.38806
			-0.32648	-0.75659		0.36633	0.3882
			-0.32477	-0.75579		0.36464	0.38759
			-0.32424	-0.75559		0.36455	0.38713
			-0.32424	-0.75581		0.36455	0.38677
			-0.31974	-0.75551		0.3594	0.3864
			-0.31807	-0.75535		0.35797	0.38639
			-0.31803	-0.75456		0.35797	0.38671
			-0.31803	-0.75412		0.35797	0.3869
			-0.31296	-0.75398		0.35206	0.3867
			-0.31176	-0.75395		0.35101	0.38631
			-0.31176	-0.75386		0.35101	0.38631
			-0.31176	-0.75278		0.34686	0.38603
			-0.30579	-0.75175		0.34515	0.38548
			-0.30503	-0.7514		0.34463	0.38555
			-0.30503	-0.75076		0.34463	0.38557
			-0.3007	-0.75125		0.33999	0.38548
			-0.29903	-0.75212		0.33826	0.38548
			-0.29857	-0.75191		0.33822	0.38564
			-0.29857	-0.75081		0.33822	0.38488
			-0.29391	-0.74972		0.33298	0.3846
			-0.2922	-0.74978		0.33138	0.38494
			-0.29215	-0.74927		0.33138	0.38491
			-0.29215	-0.74892		0.33138	0.38465
			-0.28695	-0.74898		0.32576	0.38445
			-0.2856	-0.74904		0.32464	0.3842
			-0.2856	-0.74844		0.32464	0.38356
			-0.2856	-0.74679		0.32044	0.3828
			-0.28007	-0.74674		0.31868	0.38278
			-0.27901	-0.747		0.31805	0.38295
			-0.27901	-0.74794		0.31805	0.38272
			-0.27901	-0.74698		0.31343	0.38206
			-0.27304	-0.74628		0.31169	0.38217
			-0.27221	-0.74641		0.31151	0.38222
			-0.27221	-0.74629		0.31151	0.38242
			-0.26781	-0.74567		0.30628	0.38246
			-0.26607	-0.74456		0.3045	0.38208
			-0.26563	-0.74382		0.3045	0.38168
			-0.26563	-0.74375		0.3045	0.38123
			-0.26099	-0.74262		0.29922	0.38066
			-0.25937	-0.74183		0.29783	0.38055
			-0.25937	-0.74172		0.29783	0.38114
			-0.25937	-0.74156		0.29783	0.38117
			-0.2542	-0.74115		0.29237	0.3805
			-0.25306	-0.74019		0.2913	0.3803
			-0.25306	-0.73844		0.2913	0.38025
			-0.25306	-0.73685		0.2913	0.37968
			-0.2473	-0.73719		0.2854	0.37924
			-0.24655	-0.7374		0.28459	0.37888
			-0.24655	-0.7365		0.28459	0.37882
			-0.24225	-0.73614		0.28016	0.37896
			-0.24057	-0.73617		0.27842	0.3789
			-0.24023	-0.73511		0.27797	0.37884
			-0.24023	-0.73361		0.27797	0.37846
			-0.23522	-0.73338		0.27299	0.37805
			-0.23342	-0.73315		0.27129	0.37778
			-0.23339	-0.73158		0.27129	0.37732
			-0.23339	-0.73113		0.27129	0.37673
			-0.22837	-0.73146		0.26607	0.3766
			-0.22704	-0.73107		0.26498	0.37648
			-0.22704	-0.73045		0.26498	0.37637
			-0.22704	-0.72957		0.26072	0.37634
			-0.22144	-0.72868		0.25891	0.3761
			-0.22056	-0.72761		0.25821	0.37554
			-0.22056	-0.72659		0.25821	0.37464
			-0.2161	-0.72591		0.25372	0.37407
			-0.21432	-0.72538		0.252	0.37424
			-0.21387	-0.7252		0.25183	0.37456
			-0.21387	-0.72429		0.25183	0.37434
			-0.20922	-0.72237		0.24649	0.37406
			-0.20752	-0.72108		0.24501	0.37367
			-0.20738	-0.71984		0.24501	0.3737
			-0.20738	-0.7201		0.24501	0.37326
			-0.20236	-0.72115		0.23964	0.37276
			-0.20091	-0.72084		0.23873	0.37264
			-0.20091	-0.71935		0.23873	0.37239
			-0.20091	-0.71791		0.23425	0.37178
			-0.19553	-0.71648		0.23242	0.37146
			-0.1944	-0.71575		0.23198	0.37108
			-0.1944	-0.71598		0.23198	0.37095
			-0.1944	-0.71505		0.22704	0.37064
			-0.18833	-0.71396		0.2253	0.37042
			-0.18754	-0.71257		0.2253	0.37021
			-0.18754	-0.7113		0.2253	0.36994
			-0.1832	-0.71073		0.22007	0.36923
			-0.18151	-0.71027		0.21874	0.36876
			-0.18118	-0.7092		0.21874	0.3689
			-0.18118	-0.7072		0.21874	0.36874
			-0.17623	-0.70616		0.21298	0.36808
			-0.17447	-0.70536		0.21214	0.36769
			-0.17445	-0.70407		0.21214	0.36759
			-0.17445	-0.70258		0.20762	0.36691
			-0.16941	-0.70154		0.20583	0.36668
			-0.16824	-0.70076		0.20545	0.36666
			-0.16824	-0.69945		0.20545	0.36606
			-0.16824	-0.69791		0.2007	0.3654
			-0.16252	-0.69649		0.19909	0.36476
			-0.16189	-0.69588		0.19909	0.36436
			-0.16189	-0.69456		0.19909	0.36368
			-0.15724	-0.69244		0.19371	0.36297
			-0.15547	-0.69099		0.19246	0.36224
			-0.15524	-0.6904		0.19246	0.36228
			-0.15524	-0.68966		0.19246	0.3617
			-0.15026	-0.68797		0.18645	0.36065
			-0.14889	-0.68595		0.18553	0.35976
			-0.14889	-0.68391		0.18552	0.35937
			-0.14889	-0.68144		0.18134	0.35937
			-0.14336	-0.6797		0.17967	0.35906
			-0.14247	-0.67847		0.17922	0.35858
			-0.14247	-0.67712		0.17922	0.3584
			-0.13817	-0.67537		0.17426	0.35783
			-0.13645	-0.67344		0.17257	0.35734
			-0.13601	-0.67191		0.17257	0.35674
			-0.13602	-0.6701		0.17257	0.35597
			-0.13127	-0.66799		0.1672	0.35558
			-0.12955	-0.66628		0.166	0.35524
			-0.12943	-0.66483		0.166	0.3545
			-0.12943	-0.66337		0.166	0.35388
			-0.12458	-0.6615		0.16019	0.35325
			-0.1231	-0.659		0.15935	0.35238
			-0.1231	-0.65657		0.15935	0.35175
			-0.1231	-0.65467		0.15499	0.35136
			-0.11769	-0.65315		0.15326	0.35039
			-0.11661	-0.65021		0.15275	0.34974
			-0.11661	-0.64743		0.15275	0.34897
			-0.11661	-0.6445		0.14801	0.34799
			-0.11036	-0.64151		0.14626	0.34712
			-0.10974	-0.63843		0.14616	0.34643
			-0.10974	-0.63574		0.14616	0.34604
			-0.10536	-0.63316		0.14094	0.34572
			-0.10372	-0.63046		0.13947	0.3452
			-0.10352	-0.62764		0.13947	0.344
			-0.10352	-0.6254		0.13947	0.34301
			-0.09839	-0.62281		0.13381	0.34226
			-0.09685	-0.61919		0.13278	0.34117
			-0.09685	-0.61523		0.13278	0.34057
			-0.09685	-0.61197		0.12854	0.33926
			-0.09117	-0.60843		0.1268	0.33824
			-0.09003	-0.60445		0.12609	0.33756
			-0.09003	-0.60102		0.12609	0.33663
			-0.09003	-0.59772		0.12131	0.33564
			-0.08453	-0.59401		0.11946	0.3345
			-0.08391	-0.58981		0.11924	0.33352
			-0.08391	-0.58575		0.11924	0.33237
			-0.07936	-0.58164		0.11411	0.33087
			-0.07763	-0.57754		0.11247	0.32978
			-0.07733	-0.57274		0.11247	0.32883
			-0.07733	-0.56778		0.11247	0.32769
			-0.07228	-0.56296		0.10714	0.32637
			-0.07065	-0.5572		0.10585	0.32483
			-0.07065	-0.55114		0.10585	0.32314
			-0.07065	-0.54614		0.10585	0.32186
			-0.06526	-0.54052		0.10012	0.32033
			-0.06406	-0.53453		0.0992	0.31936
			-0.06406	-0.5289		0.0992	0.31821
			-0.06406	-0.52259		0.09484	0.31675
			-0.05841	-0.51524		0.09308	0.31524
			-0.05767	-0.50806		0.09261	0.31346
			-0.05767	-0.50065		0.09261	0.31171
			-0.05329	-0.49219		0.08784	0.31004
			-0.05158	-0.48397		0.0861	0.30805
			-0.05123	-0.47596		0.08595	0.30629
			-0.05123	-0.46775		0.08595	0.30441
			-0.04607	-0.45933		0.08059	0.30217
			-0.04443	-0.45027		0.07894	0.29997
			-0.04443	-0.44035		0.07894	0.29742
			-0.04443	-0.42976		0.07894	0.29536
			-0.03935	-0.41839		0.07353	0.29341
			-0.03812	-0.40683		0.07225	0.29103
			-0.03812	-0.39508		0.07225	0.28872
			-0.03812	-0.38287		0.07225	0.28625
			-0.03242	-0.37051		0.06657	0.28344
			-0.0315	-0.35776		0.06548	0.28053
			-0.0315	-0.34408		0.06548	0.27805
			-0.02734	-0.32938		0.0612	0.27555
			-0.02565	-0.31421		0.05939	0.27245
			-0.02515	-0.29906		0.05871	0.26905
			-0.02515	-0.28249		0.05871	0.26553
			-0.02064	-0.2651		0.05427	0.26217
			-0.01896	-0.24723		0.05257	0.25885
			-0.01888	-0.22901		0.05231	0.25535
			-0.01888	-0.20982		0.05231	0.25143
			-0.01368	-0.18952		0.04731	0.24717
			-0.01222	-0.16857		0.04559	0.24315
			-0.01222	-0.1476		0.04559	0.23901
			-0.01222	-0.12631		0.04559	0.23442
			-0.00496	-0.10385		0.03991	0.2294
			-0.00374	-0.07492		0.03856	0.22448
			-0.00374	-0.03474		0.03856	0.2193
			0.0018	0.01123		0.03479	0.21358
			0.00404	0.0486		0.03314	0.20785
			0.00455	0.07508		0.03248	0.20207
			0.00455	0.09426		0.03248	0.19587
			0.00755	0.10974		0.02809	0.18935
			0.00863	0.12478		0.0264	0.18262
			0.00863	0.14049		0.02605	0.17573
			0.00863	0.15645		0.02605	0.16849
			0.01284	0.17262		0.02123	0.16074
			0.01387	0.18936		0.01956	0.15256
			0.01387	0.20661		0.01956	0.144
			0.01387	0.22394		0.01956	0.13518
			0.01906	0.24138		0.01418	0.12596
			0.01987	0.25879		0.01282	0.11634
			0.01987	0.27583		0.01282	0.1063
			0.02413	0.29227		0.01282	0.09603
			0.02583	0.30857		0.00737	0.0853
			0.02632	0.32428		0.00644	0.07415
			0.02632	0.33907		0.00644	0.0624
			0.03101	0.35335		-0.00142	0.04672
			0.03273	0.36722		-0.00463	0.02225
			0.03283	0.38071		-0.00591	-0.00134
			0.03283	0.39351		-0.00591	-0.01778
			0.03762	0.40568		-0.00818	-0.02763
			0.03884	0.41747		-0.00905	-0.03428
			0.03884	0.4284		-0.00924	-0.04064
			0.03884	0.43929		-0.00924	-0.0478
			0.04508	0.45023		-0.0128	-0.05568
			0.04599	0.46076		-0.01407	-0.06424
			0.04599	0.47112		-0.01407	-0.07342
			0.0506	0.48088		-0.01407	-0.08273
			0.05242	0.48954		-0.01893	-0.09211
			0.05281	0.49791		-0.02015	-0.10133
			0.05281	0.50626		-0.02015	-0.11059
			0.0578	0.51425		-0.02015	-0.11994
			0.05929	0.52213		-0.02552	-0.12893
			0.05929	0.52907		-0.02646	-0.13743
			0.05929	0.53602		-0.02646	-0.1456
			0.06483	0.54206		-0.03076	-0.1535
			0.06591	0.54784		-0.03252	-0.16107
			0.06591	0.55336		-0.03317	-0.16838
			0.07015	0.55907		-0.03317	-0.17556
			0.07193	0.565		-0.0379	-0.18239
			0.07239	0.57044		-0.03969	-0.18874
			0.07239	0.57587		-0.03999	-0.19472
			0.0772	0.58108		-0.03999	-0.20053
			0.07895	0.58624		-0.04504	-0.20663
			0.07898	0.59114		-0.04663	-0.21228
			0.07898	0.59592		-0.04663	-0.21762
			0.08418	0.60037		-0.04663	-0.22305
			0.08557	0.60413		-0.05253	-0.22797
			0.08557	0.60788		-0.05368	-0.23256
			0.08557	0.61157		-0.05368	-0.23693
			0.09102	0.61492		-0.05796	-0.24145
			0.09201	0.61803		-0.05975	-0.24585
			0.09201	0.62139		-0.06031	-0.24974
			0.09627	0.62471		-0.06031	-0.25344
			0.09803	0.62768		-0.06507	-0.25673
			0.0984	0.63026		-0.0668	-0.25996
			0.10298	0.62336		-0.0668	-0.26347
			0.10956	0.64242		-0.0668	-0.2664
			0.11102	0.64896		-0.0721	-0.26911
			0.11102	0.65266		-0.07348	-0.27226
			0.11102	0.65543		-0.07348	-0.27527
			0.1168	0.65841		-0.07348	-0.27802
			0.11757	0.66118		-0.07941	-0.28093
			0.11757	0.66385		-0.08024	-0.28371
			0.12193	0.66638		-0.08024	-0.28612
			0.12364	0.66776		-0.0847	-0.28847
			0.12409	0.67		-0.08645	-0.29094
			0.12409	0.67291		-0.08688	-0.29311
			0.12882	0.67588		-0.08688	-0.29525
			0.13055	0.67801		-0.09169	-0.2971
			0.13058	0.67931		-0.09344	-0.29904
			0.134	0.68038		-0.09346	-0.30079
			0.13602	0.68206		-0.09346	-0.30282
			0.13743	0.68367		-0.09864	-0.30486
			0.13743	0.68416		-0.10006	-0.30687
			0.13743	0.68519		-0.10006	-0.30858
			0.14283	0.68667		-0.10006	-0.31057
			0.14373	0.68831		-0.10579	-0.31222
			0.14373	0.68967		-0.10678	-0.3135
			0.14816	0.69155		-0.10678	-0.31494
			0.14995	0.69311		-0.11107	-0.31629
			0.1505	0.69439		-0.11283	-0.31794
			0.1505	0.69647		-0.1134	-0.31924
			0.1551	0.69849		-0.1134	-0.32083
			0.15679	0.70018		-0.11799	-0.32217
			0.15679	0.7013		-0.11971	-0.32305
			0.15679	0.70181		-0.11985	-0.32385
			0.16191	0.70219		-0.11985	-0.32525
			0.16309	0.70339		-0.12515	-0.32644
			0.16309	0.70424		-0.12663	-0.32748
			0.16309	0.70552		-0.12663	-0.32848
			0.16891	0.70748		-0.12663	-0.32957
			0.16974	0.70942		-0.13213	-0.33092
			0.16974	0.71146		-0.13295	-0.33176
			0.17395	0.71321		-0.13295	-0.33249
			0.17562	0.71442		-0.13729	-0.33321
			0.17599	0.71464		-0.139	-0.33396
			0.17599	0.7143		-0.13939	-0.33456
			0.18068	0.71517		-0.13939	-0.33538
			0.18227	0.71574		-0.1443	-0.33682
			0.18226	0.71726		-0.146	-0.33808
			0.18227	0.7183		-0.146	-0.33888
			0.18765	0.71814		-0.146	-0.33997
			0.18896	0.71898		-0.15116	-0.34097
			0.18896	0.72026		-0.15232	-0.34147
			0.18896	0.72144		-0.15232	-0.34188
			0.19459	0.72244		-0.15232	-0.34286
			0.1954	0.72306		-0.15837	-0.34326
			0.1954	0.72428		-0.15922	-0.34383
			0.19974	0.72526		-0.15922	-0.34468
			0.20145	0.72568		-0.16346	-0.34557
			0.20165	0.72685		-0.16513	-0.34603
			0.20165	0.72931		-0.16555	-0.34638
			0.20675	0.73124		-0.16555	-0.34651
			0.20835	0.73224		-0.17029	-0.34704
			0.20835	0.73336		-0.17201	-0.34764
			0.20835	0.73401		-0.17206	-0.34801
			0.21372	0.73471		-0.17206	-0.34846
			0.21489	0.73536		-0.17732	-0.34893
			0.21489	0.73606		-0.17884	-0.34944
			0.21489	0.73655		-0.17884	-0.35006
			0.22074	0.73742		-0.17884	-0.35106
			0.22144	0.7378		-0.18428	-0.3522
			0.22144	0.73788		-0.18539	-0.35253
			0.22592	0.7385		-0.18539	-0.353
			0.22764	0.73887		-0.18961	-0.3536
			0.2279	0.73965		-0.1914	-0.35392
			0.2279	0.74106		-0.19215	-0.35409
			0.23287	0.7414		-0.19215	-0.35441
			0.23451	0.74115		-0.19642	-0.35485
			0.23451	0.741		-0.19807	-0.35519
			0.23451	0.74144		-0.19826	-0.35554
			0.23984	0.74246		-0.19826	-0.35604
			0.24104	0.7427		-0.20338	-0.35715
			0.24104	0.74307		-0.20496	-0.3576
			0.24104	0.74362		-0.20496	-0.35791
			0.24682	0.74498		-0.20496	-0.35853
			0.2475	0.74656		-0.21026	-0.35871
			0.2475	0.7472		-0.21137	-0.35886
			0.25175	0.7476		-0.21137	-0.35907
			0.25337	0.74798		-0.21137	-0.35945
			0.25365	0.74805		-0.21755	-0.35981
			0.25365	0.74772		-0.21845	-0.36016
			0.25852	0.747		-0.21845	-0.36087
			0.26001	0.74715		-0.22272	-0.36184
			0.26001	0.74799		-0.22441	-0.36233
			0.26001	0.74875		-0.22472	-0.36236
			0.26563	0.74937		-0.22473	-0.36238
			0.26677	0.7502		-0.22961	-0.36247
			0.26677	0.75123		-0.23135	-0.36272
			0.26677	0.75184		-0.23135	-0.36263
			0.27248	0.75243		-0.23135	-0.36336
			0.27324	0.75321		-0.23663	-0.36436
			0.27324	0.75323		-0.23815	-0.36481
			0.27752	0.75315		-0.23815	-0.36488
			0.27919	0.75446		-0.23815	-0.36524
			0.27951	0.75498		-0.24347	-0.36565
			0.27951	0.75491		-0.24456	-0.36556
			0.28471	0.75461		-0.24456	-0.36543
			0.28645	0.75392		-0.24888	-0.36602
			0.28645	0.75441		-0.25071	-0.36651
			0.28645	0.75524		-0.25144	-0.36695
			0.28197	0.75617		-0.25144	-0.367
			0.29855	0.76401		-0.25572	-0.36723
			0.29855	0.76001		-0.25737	-0.36794
			0.30317	0.75934		-0.25773	-0.36841
			0.30501	0.75957		-0.25773	-0.36856
			0.30527	0.75972		-0.26259	-0.36845
			0.30527	0.75961		-0.26434	-0.36848
			0.31044	0.75975		-0.26441	-0.36848
			0.31208	0.76038		-0.26441	-0.36871
			0.31208	0.76117		-0.2696	-0.36882
			0.31208	0.76138		-0.27093	-0.36928
			0.31735	0.76179		-0.27093	-0.36957
			0.31853	0.76238		-0.27093	-0.36963
			0.31853	0.7624		-0.27671	-0.36978
			0.31853	0.76208		-0.27759	-0.37017
			0.32441	0.76229		-0.27759	-0.37064
			0.32527	0.76186		-0.28191	-0.37086
			0.32527	0.76119		-0.28364	-0.37083
			0.32943	0.76119		-0.28403	-0.37132
			0.33108	0.76173		-0.28404	-0.37202
			0.33158	0.76314		-0.28877	-0.3723
			0.33158	0.76438		-0.2904	-0.37245
			0.33647	0.7646		-0.2904	-0.37277
			0.33828	0.76435		-0.2904	-0.37323
			0.33841	0.76432		-0.29556	-0.37341
			0.33841	0.76468		-0.29673	-0.37318
			0.34326	0.76539		-0.29673	-0.37272
			0.34463	0.76632		-0.29673	-0.37237
			0.34463	0.76624		-0.30272	-0.3726
			0.34463	0.76615		-0.3037	-0.3737
			0.35015	0.76657		-0.3037	-0.37364
			0.35148	0.7667		-0.30793	-0.37355
			0.35148	0.76726		-0.30966	-0.37382
			0.35148	0.76788		-0.31029	-0.37421
			0.35724	0.76825		-0.31029	-0.37477
			0.35822	0.76859		-0.31498	-0.37467
			0.35822	0.76859		-0.31676	-0.37481
			0.36231	0.76922		-0.31707	-0.37513
			0.36399	0.77017		-0.31707	-0.37537
			0.36452	0.77019		-0.32189	-0.37578
			0.36452	0.77012		-0.32356	-0.37588
			0.36921	0.76977		-0.32356	-0.37575
			0.37096	0.76957		-0.32356	-0.37604
			0.37099	0.77014		-0.32886	-0.37651
			0.37099	0.77069		-0.3301	-0.37644
			0.37606	0.77122		-0.3301	-0.37677
			0.37731	0.7725		-0.3301	-0.37689
			0.37731	0.77409		-0.33584	-0.37694
			0.37731	0.77527		-0.33666	-0.37734
			0.38308	0.77522		-0.33666	-0.37715
			0.38395	0.77554		-0.34091	-0.37697
			0.38395	0.77558		-0.34259	-0.37725
			0.38836	0.77535		-0.34288	-0.37762
			0.39012	0.77509		-0.34288	-0.37791
			0.39069	0.77496		-0.34797	-0.378
			0.39069	0.77567		-0.34947	-0.37804
			0.39537	0.77564		-0.34947	-0.37838
			0.39712	0.77531		-0.34947	-0.37833
			0.39732	0.77485		-0.35489	-0.3782
			0.39732	0.7738		-0.35588	-0.37839
			0.40209	0.77437		-0.35588	-0.37846
			0.40356	0.77608		-0.3599	-0.37871
			0.40356	0.7766		-0.36155	-0.3788
			0.40356	0.77713		-0.36203	-0.37882
			0.40914	0.77742		-0.36203	-0.37929
			0.4103	0.77747		-0.36676	-0.37988
			0.4103	0.77768		-0.36849	-0.38036
			0.4103	0.77773		-0.36849	-0.3799
			0.41584	0.77878		-0.36849	-0.37996
			0.41657	0.7788		-0.37402	-0.38007
			0.41656	0.77776		-0.37544	-0.38001
			0.42106	0.77762		-0.37544	-0.37996
			0.42282	0.7781		-0.37544	-0.38029
			0.42323	0.7793		-0.38097	-0.38097
			0.42324	0.78		-0.38186	-0.38131
			0.42821	0.78035		-0.38186	-0.38091
			0.42995	0.78063		-0.3861	-0.38047
			0.42995	0.78076		-0.38781	-0.38098
			0.42995	0.78112		-0.38843	-0.38131
			0.43519	0.78134		-0.38843	-0.38142
			0.43648	0.78082		-0.39299	-0.38124
			0.43648	0.78116		-0.39471	-0.3809
			0.43648	0.78122		-0.39476	-0.38117
			0.44174	0.77932		-0.39476	-0.38165
			0.44246	0.77787		-0.40016	-0.382
			0.44246	0.77759		-0.40157	-0.3822
			0.44709	0.77802		-0.40157	-0.38274
			0.4489	0.78		-0.40157	-0.38243
			0.45601	0.78305		-0.40697	-0.38226
			0.45919	0.78064		-0.40797	-0.38254
			0.46105	0.78106		-0.40797	-0.38286
			0.46237	0.78115		-0.40797	-0.383
			0.46237	0.77992		-0.41402	-0.38294
			0.46237	0.77988		-0.41484	-0.38273
			0.46786	0.7803		-0.41484	-0.3829
			0.46871	0.78144		-0.41921	-0.38305
			0.46871	0.78166		-0.42093	-0.38359
			0.46871	0.78071		-0.42131	-0.38381
			0.47489	0.77961		-0.42131	-0.38338
			0.47552	0.77951		-0.42615	-0.38345
			0.47552	0.78012		-0.42778	-0.3838
			0.48008	0.78049		-0.42778	-0.38412
			0.4818	0.78149		-0.42778	-0.38465
			0.48203	0.78271		-0.43309	-0.38453
			0.48203	0.78385		-0.43423	-0.38411
			0.48711	0.78422		-0.43423	-0.38381
			0.48878	0.7836		-0.43423	-0.38429
			0.48879	0.78391		-0.44012	-0.3847
			0.48879	0.78458		-0.44092	-0.38492
			0.49405	0.78418		-0.44092	-0.38472
			0.49517	0.78339		-0.44534	-0.38457
			0.49517	0.7833		-0.44708	-0.38484
			0.49517	0.78331		-0.44756	-0.38509
			0.5007	0.78225		-0.44756	-0.38483
			0.50145	0.7825		-0.45255	-0.38529
			0.50145	0.78346		-0.45438	-0.38485
			0.50602	0.78342		-0.45439	-0.38451
			0.50782	0.78334		-0.45439	-0.38441
			0.50822	0.78421		-0.4596	-0.38487
			0.50822	0.78439		-0.46104	-0.38475
			0.51286	0.78487		-0.46104	-0.38473
			0.51438	0.78536		-0.46104	-0.38471
			0.51438	0.78548		-0.46642	-0.38503
			0.51438	0.78555		-0.46748	-0.38485
			0.51968	0.78574		-0.46748	-0.38429
			0.52097	0.78651		-0.47165	-0.38432
			0.52097	0.78744		-0.47341	-0.3848
			0.52096	0.78806		-0.4741	-0.38489
			0.52687	0.78772		-0.4741	-0.38481
			0.52765	0.78763		-0.47886	-0.38489
			0.52765	0.78812		-0.48069	-0.38527
			0.53204	0.78782		-0.48099	-0.38578
			0.53374	0.78698		-0.48099	-0.38565
			0.53405	0.7865		-0.48599	-0.3858
			0.53405	0.78672		-0.48761	-0.38588
			0.53881	0.78888		-0.48761	-0.38587
			0.54048	0.78929		-0.48761	-0.38632
			0.54048	0.78827		-0.49265	-0.38707
			0.54048	0.78502		-0.49381	-0.38763
			0.55174	0.78148		-0.4938	-0.38787
			0.55326	0.78909		-0.4938	-0.38756
			0.55326	0.79175		-0.49975	-0.38724
			0.55761	0.792		-0.50069	-0.38705
			0.55934	0.79165		-0.50069	-0.38739
			0.5599	0.79136		-0.50491	-0.3881
			0.55991	0.79267		-0.50661	-0.38773
			0.56472	0.79452		-0.50697	-0.38732
			0.56652	0.79515		-0.50697	-0.38721
			0.56669	0.79458		-0.5119	-0.38719
			0.56669	0.79285		-0.51367	-0.38702
			0.57185	0.79112		-0.5137	-0.38747
			0.57349	0.79042		-0.5137	-0.38798
			0.57349	0.7912		-0.51908	-0.38747
			0.57349	0.79249		-0.5203	-0.3871
			0.57876	0.79377		-0.52031	-0.38747
			0.57981	0.79386		-0.52423	-0.38805
			0.57981	0.79325		-0.52592	-0.38828
			0.58386	0.79282		-0.52649	-0.38751
			0.58556	0.79196		-0.52648	-0.38709
			0.58609	0.79092		-0.53128	-0.38676
			0.58609	0.78931		-0.53308	-0.38704
			0.5906	0.78915		-0.53322	-0.38798
			0.59228	0.78966		-0.53322	-0.38904
			0.59229	0.79004		-0.53841	-0.38919
			0.5923	0.79118		-0.53992	-0.38923
			0.59749	0.79369		-0.53992	-0.38951
			0.59895	0.79311		-0.53992	-0.38949
			0.59895	0.79254		-0.54535	-0.38912
			0.59896	0.79245		-0.54637	-0.38895
			0.6047	0.79232		-0.54637	-0.38894
			0.60574	0.79268		-0.55057	-0.38907
			0.60574	0.79253		-0.55231	-0.38935
			0.60574	0.79216		-0.55303	-0.38932
			0.61162	0.7923		-0.55303	-0.38935
			0.61231	0.79249		-0.55779	-0.38982
			0.61231	0.79213		-0.55963	-0.39006
			0.6168	0.79261		-0.56023	-0.39046
			0.61853	0.79331		-0.56023	-0.39075
			0.61878	0.79453		-0.56488	-0.39114
			0.61878	0.79554		-0.56662	-0.39058
			0.62363	0.79449		-0.56686	-0.39012
			0.62514	0.79335		-0.56686	-0.38998
			0.62514	0.79213		-0.57169	-0.38988
			0.62515	0.79181		-0.5733	-0.38985
			0.63058	0.79192		-0.5733	-0.38946
			0.63166	0.79291		-0.5733	-0.38952
			0.63166	0.79332		-0.57864	-0.38955
			0.63166	0.79337		-0.57984	-0.38986
			0.63718	0.79396		-0.57984	-0.38986
			0.63782	0.7936		-0.58395	-0.38997
			0.63783	0.7937		-0.58573	-0.38992
			0.64246	0.79401		-0.58639	-0.39017
			0.64423	0.79392		-0.58639	-0.39077
			0.64454	0.79556		-0.59124	-0.39101
			0.64454	0.79587		-0.59309	-0.39087
			0.64931	0.79435		-0.59322	-0.39086
			0.65097	0.79338		-0.59322	-0.39091
			0.65097	0.79356		-0.59831	-0.39064
			0.65097	0.79419		-0.5997	-0.39008
			0.65644	0.79453		-0.5997	-0.38956
			0.6578	0.79509		-0.5997	-0.38987
			0.6578	0.79493		-0.60545	-0.39047
			0.6578	0.79529		-0.60629	-0.39048
			0.66352	0.79537		-0.60629	-0.38995
			0.66439	0.79591		-0.61076	-0.3897
			0.66439	0.79658		-0.61252	-0.3902
			0.66875	0.7974		-0.61283	-0.39019
			0.67049	0.79626		-0.61283	-0.39061
			0.67084	0.79387		-0.61761	-0.39103
			0.67084	0.79338		-0.61906	-0.39082
			0.67538	0.79404		-0.61906	-0.39059
			0.67697	0.7945		-0.61906	-0.39023
			0.67698	0.79717		-0.62454	-0.39003
			0.67697	0.79952		-0.62567	-0.38982
			0.6822	0.80054		-0.62567	-0.38927
			0.68349	0.80022		-0.62567	-0.38955
			0.68349	0.80017		-0.63172	-0.38965
			0.68349	0.80085		-0.6326	-0.39006
			0.68918	0.80073		-0.6326	-0.39066
			0.69018	0.80032		-0.63715	-0.39081
			0.69677	0.78737		-0.63896	-0.39093
			0.70199	0.79772		-0.6396	-0.39129
			0.70399	0.79897		-0.6396	-0.39156
			0.70433	0.79806		-0.64428	-0.39166
			0.70433	0.79749		-0.64605	-0.39218
			0.7094	0.79839		-0.64619	-0.39308
			0.71109	0.79913		-0.64619	-0.39279
			0.71109	0.79972		-0.65145	-0.39202
			0.71109	0.79897		-0.65301	-0.39117
			0.71603	0.79724		-0.65301	-0.39098
			0.71706	0.79743		-0.65301	-0.39111
			0.71706	0.79746		-0.65823	-0.39125
			0.72099	0.79753		-0.65916	-0.39083
			0.72265	0.79819		-0.65916	-0.39043
			0.72317	0.7984		-0.66361	-0.39139
			0.72317	0.79812		-0.66544	-0.39185
			0.72775	0.79736		-0.66602	-0.39097
			0.72946	0.7972		-0.66602	-0.39084
			0.72952	0.79753		-0.67071	-0.39098
			0.72953	0.79877		-0.67246	-0.3917
			0.73451	0.80038		-0.6725	-0.39226
			0.7358	0.79995		-0.6725	-0.39257
			0.7358	0.79944		-0.67794	-0.39264
			0.7358	0.79972		-0.67927	-0.39305
			0.74163	0.80029		-0.67927	-0.39351
			0.74265	0.801		-0.68329	-0.39243
			0.74266	0.80154		-0.68506	-0.3924
			0.74266	0.80153		-0.68581	-0.39272
			0.74826	0.80159		-0.68581	-0.39243
			0.74887	0.80125		-0.69041	-0.39178
			0.74887	0.80032		-0.69219	-0.39204
			0.75321	0.80023		-0.69257	-0.39216
			0.75487	0.80073		-0.69257	-0.39147
			0.75508	0.80073		-0.69749	-0.39146
			0.75508	0.80093		-0.69915	-0.39169
			0.76024	0.80178		-0.69915	-0.39197
			0.76185	0.80235		-0.69915	-0.39237
			0.76185	0.80145		-0.70435	-0.39267
			0.76185	0.79971		-0.70556	-0.39256
			0.76681	0.79922		-0.70556	-0.39253
			0.76778	0.79994		-0.70556	-0.39281
			0.76778	0.80039		-0.71159	-0.39273
			0.76778	0.8011		-0.71243	-0.39283
			0.77369	0.79953		-0.71243	-0.39291
			0.7743	0.79759		-0.71688	-0.39283
			0.7743	0.79644		-0.71864	-0.39345
			0.77899	0.79681		-0.71904	-0.39346
			0.78076	0.79801		-0.71904	-0.39246
			0.78085	0.79879		-0.72402	-0.39276
			0.78085	0.79905		-0.72582	-0.39364
			0.78594	0.79904		-0.72589	-0.394
			0.78738	0.79836		-0.72589	-0.39358
			0.78738	0.79727		-0.73084	-0.39299
			0.78738	0.7969		-0.73213	-0.39285
			0.79271	0.79726		-0.73214	-0.39303
			0.79379	0.79792		-0.73213	-0.39366
			0.79379	0.79931		-0.73807	-0.39393
			0.7938	0.80067		-0.73895	-0.39389
			0.79957	0.80096		-0.73895	-0.39443
			0.80029	0.80105		-0.7434	-0.39478
			0.80029	0.80092		-0.74516	-0.39437
			0.80439	0.801		-0.74567	-0.39396
			0.80598	0.80153		-0.74567	-0.39376
			0.80638	0.80186		-0.7505	-0.39477
			0.80638	0.80188		-0.75228	-0.39485
			0.81125	0.80207		-0.75236	-0.39507
			0.81302	0.80185		-0.75236	-0.39576
			0.81315	0.80153		-0.7575	-0.39633
			0.81315	0.80184		-0.75885	-0.3963
			0.81795	0.80324		-0.75885	-0.39605
			0.81928	0.8037		-0.75885	-0.39498
			0.81927	0.80244		-0.76482	-0.39461
			0.81927	0.80145		-0.76578	-0.39558
			0.82508	0.80084		-0.76577	-0.39656
			0.82602	0.80103		-0.77018	-0.39644
			0.82602	0.80235		-0.77196	-0.39573
			0.82992	0.80386		-0.77236	-0.3953
			0.83148	0.80456		-0.77236	-0.39554
			0.83175	0.80391		-0.77706	-0.39542
			0.83176	0.80384		-0.77875	-0.39535
			0.83681	0.80349		-0.7788	-0.39545
			0.83855	0.80316		-0.7788	-0.39459
			0.83855	0.80338		-0.78441	-0.39386
			0.83855	0.80391		-0.7859	-0.39391
			0.8437	0.80398		-0.7859	-0.39319
			0.84496	0.80295		-0.7859	-0.39358
			0.84496	0.80194		-0.79125	-0.39471
			0.84496	0.80288		-0.79206	-0.39447
			0.85047	0.80328		-0.79206	-0.394
			0.85137	0.80407		-0.79657	-0.39383
			0.85137	0.80497		-0.79837	-0.39414
			0.85137	0.80459		-0.79882	-0.3943
			0.8573	0.80426		-0.79882	-0.39449
			0.85787	0.80337		-0.80386	-0.39416
			0.85787	0.80363		-0.80569	-0.39409
			0.86231	0.80417		-0.80576	-0.39455
			0.86397	0.80433		-0.80576	-0.39469
			0.86409	0.80398		-0.81064	-0.39408
			0.86409	0.80313		-0.81198	-0.39391
			0.86879	0.8025		-0.81198	-0.3948
			0.87018	0.80207		-0.81198	-0.39587
			0.87018	0.80076		-0.81794	-0.39615
			0.87019	0.79965		-0.81906	-0.39624
			0.87562	0.79916		-0.81906	-0.39596
			0.87659	0.80024		-0.82316	-0.39562
			0.87659	0.80143		-0.82486	-0.39579
			0.87659	0.80289		-0.82532	-0.39577
			0.88235	0.80432		-0.82532	-0.39513
			0.88298	0.8049		-0.83034	-0.39502
			0.88298	0.805		-0.83212	-0.39531
			0.8875	0.80502		-0.83212	-0.39467
			0.88923	0.80577		-0.83212	-0.39421
			0.88947	0.80774		-0.83745	-0.39415
			0.88947	0.80903		-0.8386	-0.3941
			0.89425	0.80836		-0.83861	-0.39454
			0.89581	0.80732		-0.8425	-0.39484
			0.89581	0.80612		-0.84416	-0.39532
			0.89581	0.80461		-0.84481	-0.39554
			0.9009	0.80406		-0.84481	-0.39582
			0.90218	0.80347		-0.8494	-0.39649
			0.90218	0.80317		-0.85116	-0.39654
			0.90218	0.80204		-0.85146	-0.39594
			0.90755	0.80109		-0.85146	-0.39553
			0.90848	0.80117		-0.85669	-0.39555
			0.90848	0.80171		-0.8584	-0.39566
			0.91229	0.80197		-0.8584	-0.39659
			0.91385	0.80149		-0.8584	-0.39765
			0.91431	0.80157		-0.86371	-0.39775
			0.91431	0.80225		-0.86486	-0.39691
			0.91919	0.80314		-0.86486	-0.39663
			0.92099	0.80371		-0.86907	-0.39578
			0.92104	0.80417		-0.87087	-0.39522
			0.92104	0.80414		-0.87158	-0.3951
			0.9258	0.8033		-0.87158	-0.39494
			0.92701	0.80199		-0.87584	-0.3951
			0.92701	0.8014		-0.87747	-0.39575
			0.92701	0.80225		-0.87775	-0.39587
			0.93223	0.80283		-0.87775	-0.39591
			0.93313	0.80225		-0.88302	-0.39605
			0.93313	0.80204		-0.88488	-0.39639
			0.93312	0.8036		-0.88488	-0.39632
			0.9391	0.80555		-0.88488	-0.39574
			0.9397	0.80474		-0.88987	-0.3955
			0.9397	0.80401		-0.89111	-0.39513
			0.94413	0.80459		-0.89112	-0.39462
			0.9458	0.80506		-0.89111	-0.39451
			0.94586	0.80494		-0.89709	-0.39469
			0.94586	0.8039		-0.89803	-0.39469
			0.95065	0.8027		-0.89803	-0.39559
			0.95187	0.8026		-0.90223	-0.39635
			0.95187	0.80293		-0.90392	-0.39644
			0.95188	0.80273		-0.90432	-0.39645
			0.95699	0.80253		-0.90432	-0.39655
			0.95778	0.80278		-0.9091	-0.39592
			0.95778	0.80201		-0.91084	-0.39552
			0.96187	0.8018		-0.9109	-0.39571
			0.96351	0.80161		-0.9109	-0.39602
			0.96389	0.80134		-0.91592	-0.3968
			0.96389	0.8031		-0.91711	-0.3974
			0.96849	0.80578		-0.91712	-0.39714
			0.97007	0.80672		-0.92116	-0.3966
			0.97006	0.80624		-0.92292	-0.39658
			0.97006	0.80588		-0.92367	-0.39656
			0.97509	0.80561		-0.92366	-0.39641
			0.97621	0.80531		-0.9281	-0.39648
			0.97621	0.80541		-0.92982	-0.39648
			0.97621	0.80642		-0.92993	-0.39696
			0.98523	0.80709		-0.92993	-0.39695
			0.98655	0.80611		-0.93496	-0.39671
			0.98654	0.8042		-0.93641	-0.39664
			0.98655	0.80384		-0.93641	-0.39724
			0.9907	0.80527		-0.93642	-0.3978
			0.9911	0.80567		-0.94178	-0.39769
			0.9911	0.80607		-0.94296	-0.39748
			0.989	0.80669		-0.94296	-0.39688
			0.98822	0.80645		-0.94296	-0.39625
			0.98812	0.80599		-0.94857	-0.39522
			0.98813	0.80488		-0.94944	-0.39433
			0.97761	0.80431		-0.94943	-0.39436
			0.97425	0.80515		-0.95385	-0.39535
			0.97425	0.80566		-0.95562	-0.39664
			0.97425	0.80522		-0.95609	-0.39757
			0.96376	0.80349		-0.95609	-0.39696
			0.96152	0.80252		-0.96089	-0.39627
			0.96151	0.80194		-0.9626	-0.39639
			0.96151	0.80247		-0.9626	-0.39691
			0.95038	0.80492		-0.9626	-0.39689
			0.9489	0.80629		-0.96734	-0.39719
			0.9489	0.80565		-0.9686	-0.39763
			0.94005	0.80382		-0.96859	-0.39747
			0.93658	0.80305		-0.96859	-0.39711
			0.93597	0.80334		-0.97417	-0.39692
			0.93597	0.80327		-0.9751	-0.39714
			0.92618	0.80279		-0.9751	-0.39696
			0.92322	0.80261		-0.9792	-0.39617
			0.92322	0.80253		-0.98087	-0.39587
			0.92322	0.80282		-0.98134	-0.39627
			0.9124	0.80323		-0.98134	-0.39674
			0.91019	0.80176		-0.98616	-0.39671
			0.91019	0.79918		-0.98779	-0.3972
			0.91019	0.79867		-0.98779	-0.39801
			0.89881	0.79957		-0.98778	-0.3984
			0.89734	0.80112		-0.99252	-0.39856
			0.89734	0.80123		-0.99351	-0.39847
			0.88833	0.80087		-0.99351	-0.39804
			0.88482	0.80024		-0.99351	-0.39758
			0.88385	0.80031		-0.99935	-0.39742
			0.88385	0.80132		-1.00011	-0.39666
			0.87464	0.80188		-1.00012	-0.3964
			0.87135	0.80155		-1.00419	-0.39663
			0.87134	0.80049		-1.00578	-0.39702
			0.87134	0.8005		-1.00607	-0.39735
			0.86066	0.80121		-1.00607	-0.39725
			0.85783	0.80112		-1.00619	-0.39764
			0.85783	0.80074		-1.00623	-0.39794
			0.85783	0.79972		-1.00623	-0.39794
			0.84692	0.79929		-1.00623	-0.39827
			0.84484	0.80026		-1.00328	-0.39905
			0.84484	0.80065		-1.00249	-0.39873
			0.84484	0.8006		-1.00248	-0.39747
			0.8327	0.80121		-1.00248	-0.39704
			0.83142	0.80244		-0.99739	-0.39747
			0.83142	0.80317		-0.99652	-0.39722
			0.82217	0.80268		-0.99652	-0.39656
			0.81867	0.80193		-0.99254	-0.39738
			0.81838	0.8015		-0.99092	-0.39791
			0.81837	0.80141		-0.99043	-0.39691
			0.80833	0.80189		-0.99043	-0.39634
			0.8054	0.80238		-0.9858	-0.39621
			0.8054	0.80274		-0.98408	-0.39612
			0.79877	0.80282		-0.98395	-0.39593
			0.79438	0.80187		-0.98395	-0.39548
			0.79214	0.80047		-0.9791	-0.39554
			0.79214	0.79967		-0.97773	-0.39557
			0.79214	0.79913		-0.97773	-0.39607
			0.77999	0.79831		-0.97773	-0.39608
			0.77829	0.79747		-0.97201	-0.39578
			0.77829	0.79769		-0.9709	-0.39613
			0.76948	0.79801		-0.97091	-0.39619
			0.766	0.79834		-0.96694	-0.39604
			0.76517	0.79876		-0.96527	-0.39592
			0.76517	0.79745		-0.96477	-0.39639
			0.75525	0.79637		-0.96477	-0.39681
			0.75166	0.7955		-0.96003	-0.39739
			0.75134	0.79555		-0.95834	-0.39729
			0.75134	0.79673		-0.95834	-0.39673
			0.74107	0.79787		-0.95834	-0.39624
			0.73791	0.79783		-0.95312	-0.39641
			0.7379	0.79722		-0.95201	-0.39573
			0.7379	0.79665		-0.95202	-0.39552
			0.72722	0.79647		-0.94807	-0.39582
			0.72505	0.79527		-0.94639	-0.39597
			0.72505	0.79465		-0.94578	-0.3966
			0.72505	0.79463		-0.94578	-0.39669
			0.71312	0.79357		-0.94114	-0.39627
			0.71187	0.79242		-0.93938	-0.39654
			0.71187	0.79251		-0.93921	-0.39648
			0.70258	0.79381		-0.93921	-0.39672
			0.69907	0.79403		-0.9341	-0.39688
			0.6987	0.79406		-0.93256	-0.3963
			0.6987	0.79527		-0.93256	-0.39562
			0.6885	0.79608		-0.93255	-0.39559
			0.6854	0.79585		-0.92715	-0.39605
			0.6854	0.79535		-0.92602	-0.39589
			0.67875	0.79551		-0.92602	-0.39563
			0.67429	0.79591		-0.92602	-0.39568
			0.6721	0.79669		-0.92021	-0.39567
			0.6721	0.79687		-0.91941	-0.39605
			0.6721	0.79653		-0.91941	-0.39656
			0.65981	0.7962		-0.91505	-0.39668
			0.65851	0.7954		-0.91334	-0.39651
			0.6585	0.79436		-0.91288	-0.39562
			0.64901	0.79338		-0.91288	-0.39503
			0.64542	0.79431		-0.90842	-0.39526
			0.64498	0.79565		-0.90678	-0.39582
			0.64498	0.79558		-0.90669	-0.39602
			0.63503	0.79361		-0.90669	-0.39601
			0.63193	0.79219		-0.90125	-0.39574
			0.63193	0.79172		-0.89984	-0.39525
			0.63193	0.79163		-0.89984	-0.39469
			0.62066	0.79096		-0.89984	-0.39445
			0.61809	0.79081		-0.89419	-0.39448
			0.61809	0.79107		-0.89341	-0.3947
			0.61809	0.79146		-0.8934	-0.39535
			0.60662	0.79127		-0.88904	-0.39619
			0.60519	0.79065		-0.88733	-0.39692
			0.60519	0.79006		-0.88702	-0.3967
			0.59592	0.79033		-0.88702	-0.39625
			0.59235	0.79075		-0.88216	-0.39568
			0.59163	0.79026		-0.88068	-0.39431
			0.59163	0.78967		-0.88068	-0.3938
			0.5817	0.79031		-0.88068	-0.39497
			0.57839	0.79062		-0.87531	-0.39605
			0.57839	0.79001		-0.87432	-0.3964
			0.57839	0.78886		-0.87432	-0.3962
			0.56736	0.78743		-0.86983	-0.39573
			0.56476	0.78699		-0.86797	-0.39533
			0.56476	0.78711		-0.86745	-0.39531
			0.56476	0.78658		-0.86745	-0.3961
			0.55288	0.78621		-0.8627	-0.39556
			0.55106	0.78606		-0.86095	-0.39514
			0.55106	0.78648		-0.86087	-0.3954
			0.55106	0.78742		-0.86087	-0.39575
			0.53861	0.78842		-0.85593	-0.39658
			0.5374	0.78882		-0.85449	-0.39671
			0.5374	0.7884		-0.85449	-0.39653
			0.52823	0.78793		-0.85449	-0.39584
			0.52478	0.78744		-0.84866	-0.39531
			0.52424	0.78721		-0.84756	-0.39526
			0.52424	0.78678		-0.84756	-0.39539
			0.51383	0.78615		-0.84354	-0.39536
			0.51035	0.78639		-0.84187	-0.39534
			0.51035	0.78603		-0.84137	-0.39552
			0.51035	0.78527		-0.84137	-0.39593
			0.49975	0.78519		-0.83646	-0.39597
			0.49742	0.78538		-0.83465	-0.39546
			0.49742	0.78566		-0.83463	-0.39485
			0.49742	0.78625		-0.83463	-0.39538
			0.48526	0.78616		-0.82954	-0.39635
			0.48346	0.78617		-0.82816	-0.39611
			0.48346	0.78539		-0.82816	-0.39653
			0.47479	0.78339		-0.82816	-0.39639
			0.47133	0.78213		-0.8225	-0.39569
			0.47041	0.7818		-0.82139	-0.39566
			0.47041	0.78202		-0.82139	-0.39614
			0.46064	0.78158		-0.81698	-0.39596
			0.45708	0.7813		-0.81513	-0.39494
			0.45701	0.77999		-0.81436	-0.39452
			0.45701	0.77994		-0.81435	-0.39436
			0.4464	0.78133		-0.80976	-0.39457
			0.4435	0.78159		-0.80797	-0.39547
			0.4435	0.78039		-0.80771	-0.39644
			0.4435	0.77942		-0.80771	-0.39716
			0.4319	0.77869		-0.80285	-0.39684
			0.42976	0.77767		-0.80141	-0.39638
			0.42976	0.77679		-0.80141	-0.39601
			0.42976	0.77675		-0.80141	-0.39597
			0.41767	0.77661		-0.79586	-0.39627
			0.4162	0.77638		-0.79479	-0.39695
			0.4162	0.77601		-0.79479	-0.39678
			0.40691	0.7762		-0.79039	-0.39589
			0.40331	0.77659		-0.78854	-0.39528
			0.40306	0.77691		-0.78795	-0.39549
			0.40306	0.77546		-0.78795	-0.39604
			0.39263	0.77436		-0.78345	-0.39626
			0.38988	0.77427		-0.78178	-0.3962
			0.38988	0.77413		-0.78162	-0.39554
			0.38988	0.77345		-0.78162	-0.39523
			0.3783	0.77233		-0.77651	-0.39495
			0.37652	0.77058		-0.77504	-0.39426
			0.37652	0.77029		-0.77504	-0.39399
			0.37652	0.77031		-0.77504	-0.39487
			0.36402	0.76884		-0.76928	-0.39573
			0.36245	0.76802		-0.76813	-0.39553
			0.36246	0.76825		-0.76814	-0.39516
			0.35343	0.76876		-0.76813	-0.39572
			0.3499	0.76871		-0.76226	-0.39692
			0.34929	0.76828		-0.76151	-0.39692
			0.34929	0.76671		-0.76151	-0.39688
			0.33943	0.76653		-0.75682	-0.39638
			0.3361	0.76634		-0.75499	-0.39598
			0.3361	0.7657		-0.75471	-0.39595
			0.3361	0.76505		-0.75471	-0.3956
			0.32521	0.76437		-0.7495	-0.39492
			0.32259	0.76332		-0.74775	-0.39464
			0.32259	0.76255		-0.74775	-0.39443
			0.32259	0.76188		-0.74775	-0.39417
			0.31082	0.7614		-0.74246	-0.39394
			0.30901	0.76052		-0.74125	-0.39409
			0.30901	0.75932		-0.74125	-0.39477
			0.30023	0.75915		-0.7373	-0.39488
			0.29671	0.75921		-0.73559	-0.39456
			0.2959	0.75814		-0.73494	-0.39485
			0.2959	0.75571		-0.73494	-0.39536
			0.28591	0.7547		-0.73022	-0.39534
			0.28238	0.75468		-0.72842	-0.39546
			0.28238	0.75396		-0.7282	-0.39528
			0.28238	0.75277		-0.7282	-0.39459
			0.27148	0.75211		-0.72307	-0.39411
			0.26914	0.75151		-0.72155	-0.39436
			0.26914	0.7501		-0.72155	-0.39457
			0.26914	0.74926		-0.72155	-0.39511
			0.25745	0.74864		-0.71586	-0.39538
			0.25583	0.74787		-0.71472	-0.39459
			0.25583	0.74656		-0.71472	-0.39414
			0.24665	0.74537		-0.71061	-0.39424
			0.24304	0.74452		-0.70888	-0.3945
			0.24224	0.7434		-0.70828	-0.39381
			0.24224	0.74288		-0.70828	-0.39328
			0.23241	0.74214		-0.70371	-0.39304
			0.22911	0.74104		-0.70199	-0.39316
			0.22911	0.74		-0.70174	-0.3939
			0.22911	0.73866		-0.70174	-0.39428
			0.21814	0.73704		-0.6964	-0.3942
			0.21554	0.73489		-0.6947	-0.3935
			0.21554	0.73297		-0.6947	-0.39268
			0.21554	0.73152		-0.69469	-0.39272
			0.2038	0.73014		-0.68955	-0.39247
			0.20185	0.72824		-0.68839	-0.39258
			0.20185	0.7267		-0.68839	-0.39298
			0.20185	0.72555		-0.6884	-0.39372
			0.18964	0.7229		-0.68224	-0.39334
			0.18816	0.72085		-0.68139	-0.39254
			0.18816	0.71967		-0.68139	-0.39266
			0.17875	0.71867		-0.67702	-0.39353
			0.1751	0.71705		-0.67531	-0.39397
			0.17472	0.71362		-0.67493	-0.39411
			0.17472	0.71045		-0.67493	-0.3936
			0.16469	0.7081		-0.66999	-0.39332
			0.16161	0.70594		-0.66833	-0.39377
			0.16161	0.70289		-0.66833	-0.39386
			0.16161	0.69946		-0.66833	-0.39275
			0.15056	0.69712		-0.66286	-0.39159
			0.14805	0.69479		-0.66161	-0.39114
			0.14804	0.69249		-0.66161	-0.3916
			0.14805	0.68971		-0.66161	-0.39242
			0.13628	0.68655		-0.65567	-0.3928
			0.13453	0.68316		-0.65483	-0.39243
			0.13453	0.67929		-0.65483	-0.39212
			0.12543	0.67546		-0.65032	-0.39185
			0.1218	0.67174		-0.64854	-0.39225
			0.12084	0.66748		-0.64819	-0.39253
			0.12084	0.66233		-0.64819	-0.39192
			0.11092	0.6573		-0.64343	-0.39171
			0.1073	0.65245		-0.64186	-0.39167
			0.10716	0.6478		-0.64187	-0.39096
			0.10716	0.64263		-0.64187	-0.39054
			0.09667	0.63713		-0.63612	-0.3908
			0.09396	0.63125		-0.6348	-0.39129
			0.09396	0.62524		-0.6348	-0.39162
			0.09396	0.61884		-0.6348	-0.39099
			0.08251	0.61189		-0.6291	-0.39033
			0.08084	0.60404		-0.62822	-0.39032
			0.08084	0.59601		-0.62822	-0.39131
			0.07167	0.58766		-0.62399	-0.39156
			0.06805	0.57816		-0.6223	-0.39137
			0.06747	0.56833		-0.6218	-0.39183
			0.06747	0.55798		-0.6218	-0.39238
			0.05742	0.54622		-0.61701	-0.39255
			0.05442	0.53378		-0.61524	-0.39195
			0.05442	0.52018		-0.61522	-0.39112
			0.05442	0.50513		-0.61522	-0.39092
			0.04331	0.48905		-0.60991	-0.39073
			0.04093	0.47111		-0.60857	-0.39066
			0.04093	0.45191		-0.60857	-0.39126
			0.04093	0.43127		-0.60857	-0.39149
			0.02956	0.40843		-0.60292	-0.39164
			0.02797	0.38413		-0.60197	-0.39157
			0.02797	0.3576		-0.60197	-0.3909
			0.01933	0.32894		-0.59761	-0.39023
			0.01593	0.29787		-0.59583	-0.39025
			0.01519	0.26465		-0.59527	-0.3899
			0.01519	0.22868		-0.59527	-0.38922
			0.00551	0.18878		-0.59027	-0.38912
			0.00221	0.14577		-0.58841	-0.38921
			0.00221	0.10211		-0.58823	-0.38914
			0.00221	0.06466		-0.58823	-0.38957
						-0.58345	-0.39026
						-0.58206	-0.39056
						-0.58206	-0.38965
						-0.58206	-0.38893
						-0.57643	-0.38927
						-0.5754	-0.38954
						-0.5754	-0.38981
						-0.57085	-0.39039
						-0.56898	-0.39016
						-0.56833	-0.38989
						-0.56833	-0.38983
						-0.56367	-0.38955
						-0.56192	-0.38973
						-0.56165	-0.39022
						-0.56165	-0.39056
						-0.5569	-0.38945
[truncated: 1,178 more rows]

## Sheet: Figure 8c
			water			chloroform
1.00133	1		1.00236	0.82834		0.99906	0.75825
1.00475	1.00112		1.00278	0.82417		1.00589	0.76092
1.0055	1.00115		1.00278	0.82527		1.00796	0.76229
1.00553	1.00279		1.0077	0.82479		1.00796	0.7608
1.00553	1.00171		1.00923	0.81917		1.00796	0.7597
1.00235	0.99907		1.00923	0.81913		1.00895	0.7594
1.00207	0.99898		1.00923	0.82534		1.00914	0.75805
0.99328	1.00145		1.00913	0.82791		1.00914	0.75042
0.99298	1.00115		1.00911	0.82771		1.00824	0.74059
0.98142	1.0006		1.00911	0.82742		1.00785	0.73853
0.98142	1.00081		1.00728	0.82725		1.00769	0.74074
0.9743	1.00194		1.00653	0.82298		1.0077	0.74616
0.9743	1.00212		1.00629	0.81872		1.00424	0.75507
0.96796	1.00029		1.00629	0.81303		1.00292	0.76035
0.96796	0.99976		1.00222	0.80665		1.00273	0.76017
0.96163	0.99949		1.0007	0.80416		1.00272	0.76021
0.96163	0.99952		1.00063	0.80466		0.99593	0.75751
0.95516	0.99923		1.00063	0.80482		0.99395	0.74769
0.95516	0.9989		0.9915	0.80429		0.99395	0.7488
0.94863	1.00036		0.98903	0.80475		0.99396	0.7528
0.94863	0.99974		0.98903	0.81536		0.98415	0.75177
0.94232	0.99923		0.98903	0.82363		0.98235	0.754
0.93718	0.99935		0.98037	0.82456		0.98237	0.7533
0.93584	1.00144		0.97882	0.82668		0.9776	0.74732
0.93042	1.00158		0.97882	0.83598		0.97563	0.7445
0.9293	0.99827		0.97479	0.84075		0.97495	0.75262
0.9237	0.99718		0.97313	0.84205		0.97495	0.76442
0.92302	0.99974		0.97258	0.83706		0.97032	0.76381
0.9169	1.00005		0.97258	0.83462		0.96859	0.75607
0.91629	0.99874		0.96799	0.83877		0.96859	0.75211
0.91012	0.99809		0.96627	0.84063		0.96859	0.75607
0.9099	0.99481		0.9661	0.83428		0.96358	0.75785
0.90347	0.9913		0.96609	0.82612		0.96226	0.75357
0.90347	0.99185		0.96126	0.8249		0.96226	0.7505
0.897	0.99179		0.95979	0.82708		0.96226	0.74796
0.897	0.98946		0.95978	0.8272		0.95693	0.74774
0.89036	0.99055		0.95978	0.82761		0.9562	0.74958
0.89036	0.99336		0.95446	0.82822		0.9562	0.75604
0.88396	0.99253		0.95335	0.8284		0.95204	0.76056
0.88396	0.99372		0.95336	0.82607		0.9504	0.75667
0.87754	0.99401		0.94934	0.82176		0.94998	0.75744
0.87754	0.99255		0.94764	0.81719		0.94998	0.75856
0.87114	0.99218		0.94707	0.81813		0.94532	0.74963
0.86599	0.99051		0.94707	0.82243		0.94365	0.74354
0.8646	0.98944		0.94269	0.82482		0.94365	0.75401
0.85913	0.98829		0.94106	0.82332		0.94366	0.76655
0.85801	0.98937		0.94097	0.82175		0.93838	0.76642
0.85229	0.99236		0.94096	0.82227		0.93695	0.76019
0.85149	0.99143		0.93613	0.82342		0.93696	0.76058
0.84542	0.99122		0.9349	0.82646		0.93695	0.76272
0.84472	0.9935		0.9349	0.82957		0.93159	0.76302
0.83851	0.99392		0.93491	0.82596		0.93056	0.76292
0.83788	0.99294		0.92948	0.81989		0.93057	0.76575
0.83159	0.99197		0.92853	0.82255		0.92658	0.77368
0.83127	0.99248		0.92853	0.83462		0.92491	0.78088
0.82473	0.99341		0.92414	0.8409		0.92424	0.77865
0.82465	0.99529		0.92234	0.83818		0.92424	0.77653
0.81796	0.99529		0.92174	0.83032		0.91968	0.77774
0.81796	0.99312		0.92173	0.82746		0.91793	0.77632
0.81125	0.99272		0.91734	0.82438		0.91777	0.76865
0.81125	0.99347		0.91569	0.82276		0.91777	0.76385
0.80448	0.99037		0.91545	0.82496		0.91298	0.76175
0.80448	0.98531		0.91545	0.83021		0.91158	0.76416
0.79776	0.98341		0.91056	0.82429		0.91158	0.76659
0.79776	0.98275		0.90893	0.82149		0.91158	0.76444
0.791	0.98411		0.90893	0.83168		0.90633	0.766
0.791	0.9853		0.90893	0.83743		0.90541	0.76651
0.7844	0.98579		0.90377	0.82948		0.90541	0.76058
0.7844	0.98712		0.9025	0.82252		0.90118	0.75985
0.77788	0.98863		0.9025	0.8229		0.89945	0.76838
0.77788	0.99033		0.9025	0.82117		0.89897	0.77565
0.77108	0.99032		0.89719	0.82011		0.89896	0.77842
0.76601	0.98729		0.89623	0.81973		0.89458	0.77335
0.76449	0.98735		0.89623	0.82605		0.89297	0.7678
0.75906	0.98891		0.89206	0.82761		0.89293	0.76834
0.75797	0.9882		0.89034	0.82685		0.89293	0.77381
0.75204	0.98489		0.88991	0.82511		0.88748	0.77367
0.7511	0.98279		0.88991	0.83042		0.88614	0.76985
0.74508	0.98414		0.88506	0.83201		0.88614	0.76718
0.74445	0.98414		0.88331	0.83228		0.88613	0.76375
0.73811	0.98405		0.88331	0.8353		0.88074	0.76293
0.73791	0.98366		0.88331	0.83499		0.87987	0.76353
0.73115	0.98354		0.87841	0.83537		0.87986	0.76449
0.73105	0.98351		0.87711	0.8346		0.87582	0.76661
0.72457	0.98253		0.87711	0.82845		0.87418	0.77021
0.72457	0.9812		0.87711	0.82155		0.87387	0.76931
0.7178	0.97952		0.87148	0.82595		0.87387	0.76528
0.7178	0.97787		0.87044	0.83557		0.86903	0.76282
0.71119	0.9786		0.87045	0.8379		0.8673	0.76511
0.71119	0.97991		0.86637	0.83955		0.86727	0.76639
0.70469	0.97752		0.86468	0.84665		0.86727	0.76915
0.70469	0.9768		0.86414	0.84859		0.86184	0.77392
0.69789	0.97653		0.86414	0.84584		0.86044	0.77021
0.69788	0.9753		0.85931	0.84334		0.86043	0.7645
0.6912	0.97554		0.85751	0.83935		0.86043	0.76838
0.68593	0.974		0.85738	0.82865		0.8552	0.77205
0.68456	0.97522		0.85738	0.82778		0.85428	0.77063
0.67894	0.97838		0.85248	0.83394		0.85428	0.76549
0.67777	0.97894		0.85124	0.83146		0.84988	0.76304
0.67192	0.97788		0.85124	0.82803		0.84807	0.76991
0.67106	0.97662		0.84739	0.8323		0.84753	0.78248
0.66494	0.97532		0.84569	0.83702		0.84753	0.78983
0.6642	0.97511		0.84496	0.84383		0.84296	0.78717
0.65793	0.97509		0.84496	0.84488		0.84127	0.77838
0.65733	0.97608		0.84044	0.84265		0.84123	0.77508
0.65094	0.97799		0.83868	0.84764		0.84124	0.77827
0.65074	0.97844		0.83835	0.85336		0.83625	0.78058
0.64415	0.97865		0.83835	0.8514		0.83506	0.78282
0.64415	0.97758		0.83346	0.8488		0.83506	0.77988
0.63752	0.97488		0.83182	0.84693		0.83506	0.77544
0.63752	0.9724		0.83182	0.8396		0.82919	0.77381
0.63069	0.97198		0.83182	0.83578		0.82832	0.76996
0.63069	0.97204		0.82669	0.84008		0.82832	0.76718
0.62416	0.97265		0.82541	0.8438		0.82383	0.76586
0.62416	0.97396		0.82541	0.84224		0.82204	0.77367
0.61758	0.97595		0.82542	0.84346		0.82169	0.78127
0.61758	0.97728		0.81995	0.84567		0.82169	0.78199
0.61087	0.97422		0.81914	0.84658		0.81693	0.78406
0.60544	0.97151		0.81914	0.85264		0.81535	0.78496
0.6042	0.97073		0.81482	0.86173		0.81536	0.78211
0.59846	0.97245		0.8131	0.86019		0.81535	0.7796
0.59774	0.97496		0.81269	0.85234		0.81016	0.77718
0.59142	0.97453		0.81268	0.84828		0.80896	0.77844
0.59105	0.97371		0.80774	0.84642		0.80896	0.78179
0.58453	0.97633		0.80604	0.85118		0.80896	0.78575
0.58453	0.97766		0.80604	0.85001		0.80342	0.79268
0.57779	0.97632		0.80604	0.8448		0.80262	0.79591
0.57779	0.97488		0.8007	0.84169		0.80263	0.79446
0.5708	0.97425		0.79954	0.83824		0.7983	0.78827
0.5708	0.96892		0.79954	0.83957		0.79659	0.78823
0.56425	0.96229		0.79954	0.8498		0.79614	0.79239
0.56425	0.96451		0.79411	0.85318		0.79615	0.79128
0.55726	0.96374		0.79339	0.84514		0.79114	0.78883
0.55727	0.96154		0.79339	0.8425		0.78932	0.79126
0.55038	0.96194		0.78866	0.84311		0.78912	0.79783
0.55038	0.96204		0.7868	0.84119		0.78913	0.79907
0.5438	0.96214		0.78644	0.84325		0.78413	0.80442
0.53874	0.96267		0.78644	0.84318		0.78256	0.8051
0.53726	0.96189		0.78167	0.84008		0.78255	0.80054
0.53173	0.96064		0.78015	0.84195		0.78256	0.79249
0.53049	0.96099		0.78015	0.84316		0.77738	0.78548
0.52475	0.96132		0.78015	0.8466		0.77613	0.78406
0.52379	0.95995		0.77479	0.84935		0.77613	0.78287
0.51773	0.95689		0.77376	0.8444		0.77613	0.78345
0.51689	0.95666		0.77376	0.84382		0.77036	0.7872
0.5107	0.95897		0.76949	0.84855		0.76934	0.78829
0.51001	0.95874		0.76771	0.85076		0.76935	0.78476
0.50377	0.9567		0.76705	0.8554		0.76509	0.78751
0.50349	0.95556		0.76705	0.85791		0.76334	0.78944
0.49677	0.95812		0.76256	0.8573		0.76283	0.78452
0.49677	0.95685		0.76085	0.85529		0.76283	0.77981
0.48998	0.95495		0.76054	0.85662		0.75808	0.77949
0.48998	0.95767		0.76055	0.8583		0.75634	0.78312
0.48329	0.95707		0.7554	0.85849		0.75634	0.78886
0.48329	0.95543		0.75364	0.85601		0.75634	0.79223
0.47676	0.95646		0.75364	0.85899		0.75121	0.7906
0.47676	0.95716		0.75364	0.86055		0.75	0.78871
0.47018	0.95778		0.74861	0.85297		0.75	0.79231
0.47018	0.95744		0.74738	0.84776		0.74999	0.79662
0.46327	0.95573		0.74738	0.85163		0.74424	0.79162
0.4581	0.95418		0.74337	0.85709		0.74343	0.79114
0.45662	0.95467		0.74159	0.85726		0.74343	0.79672
0.45112	0.95433		0.74092	0.85051		0.73895	0.79808
0.44994	0.95217		0.74092	0.84947		0.73718	0.79459
0.44411	0.95052		0.73613	0.85045		0.73693	0.79894
0.44319	0.94911		0.7343	0.84669		0.73693	0.80204
0.43706	0.95006		0.73411	0.84309		0.73201	0.79936
0.43627	0.95413		0.73411	0.84716		0.73036	0.7955
0.43005	0.95695		0.72909	0.85728		0.73036	0.79347
0.4296	0.95503		0.7276	0.86602		0.73035	0.79357
0.42305	0.95373		0.7276	0.86756		0.72506	0.79355
0.42297	0.95131		0.7276	0.86799		0.72384	0.79107
0.41612	0.94687		0.72233	0.87098		0.72384	0.79472
0.41612	0.9466		0.72145	0.86547		0.72384	0.79756
0.4095	0.94689		0.72144	0.85791		0.71796	0.79684
0.4095	0.9438		0.71728	0.86312		0.71707	0.79833
0.40286	0.94414		0.71559	0.87445		0.71707	0.79863
0.40286	0.9468		0.71515	0.87947		0.71284	0.79358
0.39633	0.94577		0.71515	0.87772		0.71115	0.79344
0.39633	0.94306		0.71029	0.87294		0.71077	0.80131
0.3895	0.9406		0.70861	0.8676		0.71076	0.81274
0.38949	0.93846		0.7086	0.86188		0.70566	0.81227
0.3828	0.93614		0.70861	0.85459		0.70382	0.80711
0.37741	0.93445		0.70314	0.8505		0.70377	0.81066
0.37603	0.93716		0.7018	0.84874		0.70377	0.82044
0.37038	0.93999		0.7018	0.8534		0.69854	0.81906
0.36942	0.94001		0.7018	0.86339		0.69715	0.80698
0.3634	0.93635		0.69613	0.86735		0.69715	0.79525
0.36287	0.93091		0.6953	0.85864		0.69715	0.78956
0.35644	0.92966		0.6953	0.84796		0.69178	0.79155
0.35626	0.929		0.69076	0.84374		0.6908	0.79344
0.34954	0.92982		0.68896	0.84342		0.69081	0.78945
0.34954	0.93376		0.6884	0.84089		0.68658	0.7867
0.34283	0.93472		0.68841	0.84842		0.68484	0.79179
0.34283	0.93342		0.68369	0.86071		0.68427	0.80175
0.33625	0.93149		0.68194	0.87145		0.68427	0.80469
0.33625	0.93141		0.68174	0.87278		0.67946	0.79986
0.32969	0.93196		0.68174	0.86943		0.67766	0.796
0.32969	0.92957		0.6768	0.86519		0.67757	0.79987
0.32298	0.92664		0.67524	0.86583		0.67757	0.80782
0.31783	0.92591		0.67524	0.86502		0.67229	0.80493
0.31632	0.92398		0.67524	0.85838		0.67083	0.7962
0.31083	0.92254		0.6698	0.85205		0.67083	0.79396
0.30964	0.92244		0.66857	0.8513		0.67083	0.79881
0.30383	0.92306		0.66857	0.8566		0.66536	0.80292
0.30301	0.92267		0.66857	0.86384		0.6644	0.80205
0.29678	0.92107		0.66293	0.86714		0.6644	0.80342
0.29632	0.92054		0.66217	0.86705		0.6601	0.80339
0.28973	0.91821		0.66218	0.8656		0.65835	0.80127
0.28972	0.91535		0.65773	0.85933		0.65783	0.8058
0.28294	0.91556		0.65599	0.85652		0.65782	0.80628
0.28294	0.91549		0.65558	0.85706		0.65294	0.80153
0.27595	0.91452		0.65558	0.85458		0.65113	0.79958
0.27595	0.91312		0.6507	0.85639		0.65099	0.79823
0.26923	0.91212		0.6491	0.85968		0.65099	0.79871
0.26923	0.9111		0.6491	0.85862		0.64611	0.81194
0.26268	0.91116		0.6491	0.85545		0.64459	0.8165
0.26268	0.91042		0.6436	0.85477		0.6446	0.81596
0.25614	0.90856		0.64249	0.85869		0.6446	0.81568
0.25118	0.90758		0.6425	0.86321		0.63917	0.81462
0.24961	0.90592		0.63829	0.86321		0.63795	0.81348
0.24417	0.90443		0.63653	0.86462		0.63795	0.81371
0.24296	0.90227		0.63593	0.86739		0.63795	0.81114
0.23711	0.9011		0.63593	0.8742		0.63187	0.80753
0.23613	0.89873		0.63108	0.87284		0.63105	0.80971
0.23007	0.89502		0.62926	0.85843		0.63105	0.81813
0.2295	0.89361		0.62907	0.85399		0.62658	0.82307
0.22305	0.8937		0.62907	0.85907		0.62483	0.82206
0.22274	0.89279		0.62414	0.86947		0.62432	0.81559
0.21602	0.89143		0.6228	0.87573		0.62432	0.80926
0.21602	0.88972		0.6228	0.87529		0.61959	0.8137
0.20932	0.88825		0.6228	0.86973		0.61785	0.82577
0.20933	0.8873		0.61725	0.86231		0.61771	0.83128
0.20251	0.88486		0.61627	0.86096		0.61771	0.82086
0.20251	0.88231		0.61627	0.86854		0.61255	0.81332
0.19581	0.88234		0.61181	0.86803		0.61108	0.81055
0.19581	0.88242		0.60998	0.86674		0.61108	0.81508
0.18894	0.87911		0.60935	0.87195		0.61108	0.82009
0.18894	0.87501		0.60935	0.88229		0.60583	0.81471
0.18226	0.87142		0.60482	0.88376		0.60478	0.8027
0.18226	0.86958		0.60312	0.87898		0.60479	0.7979
0.1756	0.86887		0.60303	0.87518		0.60034	0.80128
0.17025	0.86827		0.60303	0.87513		0.59847	0.80825
0.16882	0.86551		0.59797	0.87176		0.59787	0.81361
0.16323	0.86144		0.59664	0.86525		0.59787	0.81914
0.16195	0.85756		0.59664	0.86506		0.59315	0.82295
0.15625	0.85436		0.59664	0.86651		0.59143	0.8243
0.1553	0.85266		0.59065	0.86479		0.59143	0.82514
0.1492	0.84998		0.58958	0.86118		0.59143	0.82501
0.14852	0.84496		0.58958	0.86032		0.58631	0.81918
0.14219	0.84227		0.58525	0.86269		0.5851	0.81586
0.14175	0.84049		0.58346	0.86569		0.5851	0.81973
0.13518	0.83744		0.58278	0.86688		0.5851	0.81787
0.13517	0.83266		0.58278	0.86679		0.57936	0.81509
0.12855	0.82745		0.57839	0.8692		0.57856	0.81085
0.12855	0.82132		0.57671	0.87163		0.57856	0.80883
0.1217	0.81695		0.57665	0.87111		0.57412	0.81309
0.1217	0.81448		0.57665	0.86868		0.57237	0.81645
0.1146	0.80989		0.57119	0.86783		0.57202	0.81583
0.1146	0.8053		0.56984	0.87054		0.57202	0.82245
0.10768	0.80008		0.56984	0.87891		0.56695	0.83456
0.10768	0.79327		0.56984	0.88193		0.56523	0.8348
0.10076	0.78727		0.56439	0.88179		0.56523	0.82395
0.10076	0.7833		0.56362	0.88417		0.56522	0.81686
0.09395	0.7773		0.56362	0.88389		0.55987	0.82241
0.09395	0.76817		0.55913	0.88107		0.55859	0.82697
0.08728	0.75952		0.55736	0.87999		0.55859	0.82628
0.08219	0.75183		0.55712	0.88172		0.55859	0.82521
0.08069	0.74208		0.55712	0.88171		0.55284	0.82626
0.07515	0.7318		0.55191	0.87617		0.55192	0.82851
0.07404	0.72234		0.55032	0.87381		0.55192	0.82953
0.06811	0.71111		0.55032	0.87792		0.54743	0.83222
0.06728	0.69926		0.55032	0.88024		0.54561	0.82986
0.06111	0.68837		0.54484	0.87621		0.54506	0.82277
0.06067	0.6763		0.5437	0.87564		0.54506	0.82249
0.0541	0.66269		0.5437	0.87627		0.54059	0.82984
0.05399	0.64689		0.5437	0.87521		0.53894	0.83415
0.04703	0.62961		0.53791	0.87813		0.53878	0.82396
0.04702	0.61167		0.5371	0.8801		0.53878	0.81163
0.04	0.59162		0.5371	0.87807		0.53344	0.81203
0.04	0.57061		0.53268	0.87321		0.53169	0.81906
0.03361	0.54732		0.53093	0.87182		0.53169	0.82221
0.03361	0.5215		0.5306	0.87419		0.53169	0.82014
0.02689	0.49352		0.5306	0.87495		0.52656	0.81547
0.02689	0.46289		0.5257	0.87313		0.52556	0.81664
0.02036	0.4275		0.52414	0.87457		0.52556	0.82215
0.02036	0.38676		0.52414	0.87007		0.52108	0.82256
0.01391	0.3412		0.52414	0.86982		0.51922	0.82772
0.01391	0.29052		0.51852	0.87467		0.5187	0.83648
0.00742	0.23316		0.51725	0.87471		0.5187	0.8334
-0.00249	0.13111		0.51725	0.87183		0.51399	0.8285
-0.00484	-0.000834778		0.51725	0.86745		0.51233	0.82473
-0.00831	-0.0925		0.51161	0.87244		0.51233	0.81851
-0.00887	-0.14202		0.51079	0.87913		0.51233	0.82121
-0.01347	-0.18697		0.51079	0.88384		0.50691	0.83046
-0.01406	-0.23439		0.5062	0.88507		0.50561	0.83564
-0.01961	-0.28581		0.50438	0.87886		0.50561	0.83104
-0.02018	-0.33805		0.50391	0.87092		0.50561	0.83227
-0.02625	-0.38366		0.50391	0.86481		0.50017	0.83447
-0.02654	-0.42086		0.49901	0.86656		0.49938	0.83436
-0.03311	-0.45478		0.49736	0.87205		0.49939	0.836
-0.03322	-0.48557		0.49737	0.87658		0.49464	0.83821
-0.03979	-0.51293		0.49737	0.87625		0.49277	0.83706
-0.03979	-0.53831		0.49209	0.87416		0.49241	0.83566
-0.04662	-0.56293		0.491	0.87045		0.49241	0.83408
-0.04662	-0.58605		0.491	0.86965		0.48777	0.8312
-0.05376	-0.60685		0.48675	0.87282		0.48614	0.82924
-0.05376	-0.62665		0.48495	0.88133		0.48614	0.82857
-0.06055	-0.64447		0.48434	0.88861		0.48614	0.82887
-0.06055	-0.66151		0.48434	0.88745		0.48049	0.82977
-0.06754	-0.67828		0.4797	0.88515		0.47905	0.83029
-0.06754	-0.69206		0.47796	0.88535		0.47905	0.82909
-0.07429	-0.70388		0.47788	0.88357		0.47905	0.82851
-0.07967	-0.71482		0.47788	0.88054		0.4735	0.82825
-0.08091	-0.72504		0.47262	0.87604		0.47254	0.82736
-0.08668	-0.73402		0.47119	0.87224		0.47254	0.83124
-0.08768	-0.7423		0.47119	0.87294		0.4683	0.83398
-0.09371	-0.75075		0.47119	0.87409		0.46657	0.83242
-0.09443	-0.75793		0.46552	0.8755		0.46607	0.8262
-0.1008	-0.76626		0.46456	0.87795		0.46607	0.82068
-0.10126	-0.77431		0.46456	0.88628		0.46131	0.8219
-0.10776	-0.78094		0.46038	0.88671		0.45956	0.82527
-0.10781	-0.78877		0.45868	0.88165		0.4595	0.82384
-0.1146	-0.79516		0.45819	0.88432		0.4595	0.82183
-0.1146	-0.79939		0.45818	0.88818		0.45431	0.8273
-0.12121	-0.80542		0.45348	0.88702		0.45298	0.83075
-0.12121	-0.81236		0.45175	0.88369		0.45298	0.82364
-0.12801	-0.81825		0.45161	0.8843		0.45298	0.82255
-0.12801	-0.82333		0.45161	0.88373		0.44702	0.82258
-0.13457	-0.82665		0.44626	0.88296		0.44612	0.81418
-0.13457	-0.83163		0.44479	0.88117		0.44612	0.81223
-0.14122	-0.8359		0.44479	0.87525		0.44171	0.82496
-0.14122	-0.83898		0.44479	0.86949		0.43995	0.83771
-0.1479	-0.84365		0.43916	0.86915		0.43968	0.84258
-0.15322	-0.8486		0.43814	0.87069		0.43968	0.83866
-0.15442	-0.85133		0.43814	0.87664		0.43473	0.83126
-0.1602	-0.85397		0.43399	0.87955		0.43321	0.82834
-0.16093	-0.85734		0.43227	0.88135		0.43321	0.83137
-0.16714	-0.86154		0.43172	0.8832		0.43321	0.83344
-0.16755	-0.86658		0.43172	0.88335		0.42785	0.83516
-0.17399	-0.87014		0.42689	0.88475		0.42679	0.83192
-0.17399	-0.87321		0.42509	0.88626		0.42679	0.81928
-0.18051	-0.8738		0.42484	0.88397		0.42259	0.81633
-0.1805	-0.87419		0.42484	0.87891		0.42082	0.82455
-0.18716	-0.87668		0.4199	0.87331		0.42024	0.83106
-0.18716	-0.87979		0.41832	0.87191		0.42024	0.83374
-0.19371	-0.8815		0.41833	0.87307		0.41541	0.83267
-0.19371	-0.88383		0.41832	0.87744		0.41361	0.8303
-0.20034	-0.88456		0.41275	0.88462		0.41345	0.83163
-0.20034	-0.88506		0.41169	0.88763		0.41345	0.83366
-0.20693	-0.88673		0.41169	0.88938		0.40848	0.83669
-0.2123	-0.88911		0.40748	0.89326		0.40709	0.83805
-0.21358	-0.89176		0.40573	0.89612		0.40709	0.83528
-0.21926	-0.89166		0.40505	0.89143		0.40709	0.8314
-0.22027	-0.8923		0.40505	0.88862		0.40146	0.83222
-0.22622	-0.89441		0.40038	0.88898		0.40044	0.83014
-0.22692	-0.8978		0.3986	0.88773		0.40044	0.82203
-0.23315	-0.90023		0.39849	0.88798		0.39607	0.81723
-0.23367	-0.90203		0.39849	0.89394		0.39426	0.81854
-0.24011	-0.90354		0.39336	0.89678		0.39368	0.82352
-0.24032	-0.90463		0.39192	0.89683		0.39367	0.82777
-0.24694	-0.90585		0.39191	0.89136		0.38921	0.83112
-0.24694	-0.90821		0.39191	0.88791		0.38754	0.83546
-0.25381	-0.91053		0.38647	0.89235		0.38728	0.83327
-0.25381	-0.91252		0.38541	0.8967		0.38728	0.83225
-0.26048	-0.91272		0.38541	0.8926		0.38196	0.83751
-0.26048	-0.91229		0.38132	0.88878		0.38023	0.8354
-0.26711	-0.91382		0.37961	0.89119		0.38023	0.83394
-0.26711	-0.91573		0.37889	0.89142		0.38023	0.83612
-0.2738	-0.91681		0.37889	0.8939		0.3749	0.84104
-0.2738	-0.91787		0.37412	0.89714		0.37369	0.84353
-0.28035	-0.91924		0.37228	0.89852		0.37369	0.8449
-0.28035	-0.91923		0.3719	0.90021		0.37369	0.84246
-0.28674	-0.92022		0.3719	0.89705		0.36778	0.84054
-0.29207	-0.9223		0.3671	0.89101		0.36698	0.84263
-0.2932	-0.92292		0.36546	0.8929		0.36698	0.84303
-0.29903	-0.92281		0.36546	0.89632		0.36276	0.84403
-0.2999	-0.9233		0.36546	0.89562		0.36111	0.84469
-0.30596	-0.92393		0.35997	0.89297		0.36094	0.84489
-0.30642	-0.9251		0.3587	0.88952		0.36094	0.83827
-0.31291	-0.92594		0.3587	0.8869		0.35561	0.83514
-0.3132	-0.92679		0.35482	0.8887		0.35421	0.83795
-0.31986	-0.92812		0.35313	0.89268		0.35421	0.83276
-0.32002	-0.92981		0.3524	0.89647		0.35421	0.81979
-0.32652	-0.9303		0.3524	0.89294		0.34869	0.82036
-0.32652	-0.93045		0.3477	0.88498		0.34786	0.82331
-0.33323	-0.93068		0.34588	0.881		0.34786	0.82459
-0.33322	-0.93047		0.34549	0.87725		0.34338	0.82356
-0.33975	-0.93016		0.34549	0.87299		0.34159	0.82531
-0.33975	-0.93094		0.3407	0.87143		0.34118	0.82981
-0.34645	-0.93158		0.33912	0.87295		0.34118	0.83557
-0.34645	-0.93338		0.33912	0.87412		0.33622	0.83559
-0.35314	-0.93431		0.33912	0.87609		0.33444	0.83199
-0.35314	-0.93574		0.33381	0.88285		0.3344	0.82818
-0.35977	-0.93773		0.33271	0.88631		0.3344	0.82758
-0.36483	-0.93726		0.33271	0.88513		0.3292	0.82945
-0.36624	-0.93723		0.3284	0.88282		0.32777	0.83052
-0.37175	-0.93675		0.32657	0.88366		0.32777	0.83192
-0.37296	-0.93828		0.32582	0.89027		0.32777	0.83103
-0.37868	-0.93971		0.32582	0.8965		0.32213	0.8331
-0.37947	-0.93865		0.32128	0.89234		0.32113	0.8313
-0.3856	-0.93917		0.31953	0.8884		0.32113	0.82531
-0.3863	-0.94045		0.31922	0.88424		0.31683	0.82347
-0.39257	-0.94061		0.31922	0.88067		0.31507	0.82858
-0.39287	-0.94038		0.3142	0.88187		0.31437	0.83286
-0.3995	-0.94365		0.31243	0.8776		0.31436	0.83309
-0.3995	-0.947		0.31235	0.87307		0.31003	0.8305
-0.40611	-0.94773		0.31235	0.87345		0.30836	0.82645
-0.40611	-0.9482		0.30719	0.87443		0.30801	0.82578
-0.41266	-0.94756		0.30575	0.87799		0.30801	0.82849
-0.41266	-0.94531		0.30575	0.88007		0.30305	0.83669
-0.4193	-0.94528		0.30576	0.88424		0.30137	0.83918
-0.4193	-0.9461		0.30025	0.88762		0.30137	0.83693
-0.4259	-0.94756		0.29922	0.88778		0.30137	0.83166
-0.4259	-0.94971		0.29922	0.88566		0.29592	0.83014
-0.43236	-0.95025		0.29496	0.88343		0.29455	0.83266
-0.43765	-0.94966		0.29319	0.88138		0.29455	0.83662
-0.43896	-0.9497		0.29258	0.88223		0.29455	0.83463
-0.4446	-0.95119		0.29258	0.88634		0.28897	0.83155
-0.44575	-0.95177		0.28781	0.88643		0.28813	0.8385
-0.4515	-0.95237		0.28601	0.88437		0.28813	0.8361
-0.4523	-0.95309		0.28576	0.88132		0.28369	0.83142
-0.45849	-0.95347		0.28576	0.87727		0.28193	0.82868
-0.45913	-0.9554		0.28072	0.87832		0.28162	0.82606
-0.46547	-0.95526		0.27922	0.88267		0.28162	0.82192
-0.46573	-0.95543		0.27922	0.88392		0.27639	0.82282
-0.47225	-0.95422		0.27922	0.88149		0.27478	0.82527
-0.47226	-0.95285		0.27393	0.87512		0.27478	0.83079
-0.47904	-0.95531		0.2729	0.8729		0.27478	0.83766
-0.47904	-0.95648		0.2729	0.8808		0.26944	0.84307
-0.48568	-0.95723		0.26862	0.88325		0.26847	0.84677
-0.48568	-0.95666		0.26683	0.87979		0.26847	0.84316
-0.49256	-0.95594		0.26621	0.87608		0.2642	0.83538
-0.49256	-0.95599		0.26621	0.8755		0.26245	0.83099
-0.49907	-0.95698		0.2615	0.87553		0.26184	0.83242
-0.49907	-0.9579		0.25973	0.87678		0.26184	0.83887
-0.50565	-0.95672		0.2596	0.87966		0.25719	0.84232
-0.51078	-0.95623		0.2596	0.87911		0.25544	0.84033
-0.51221	-0.95741		0.25453	0.87511		0.25533	0.83644
-0.51777	-0.9584		0.25317	0.87437		0.25533	0.83532
-0.51897	-0.95919		0.25317	0.87256		0.25023	0.83706
-0.52477	-0.96099		0.25317	0.86975		0.24868	0.83651
-0.52563	-0.96214		0.24748	0.86928		0.24868	0.83287
-0.5317	-0.96046		0.24653	0.86958		0.24868	0.82802
-0.53235	-0.95877		0.24653	0.86858		0.24325	0.82811
-0.53873	-0.96113		0.24217	0.86985		0.24211	0.82875
-0.53936	-0.9614		0.2404	0.87069		0.24211	0.82816
-0.54569	-0.96164		0.23997	0.8695		0.23774	0.82499
-0.54624	-0.96256		0.23997	0.87021		0.23588	0.82072
-0.55266	-0.96211		0.23511	0.87279		0.23517	0.82265
-0.55291	-0.96099		0.23347	0.87392		0.23517	0.82403
-0.55964	-0.96194		0.23347	0.87226		0.23067	0.8257
-0.55964	-0.96262		0.23347	0.87161		0.22895	0.82664
-0.56622	-0.96258		0.22799	0.87261		0.22874	0.82253
-0.56623	-0.96188		0.22687	0.8711		0.22874	0.82358
-0.57304	-0.96071		0.22687	0.86673		0.22358	0.82584
-0.57304	-0.96026		0.22278	0.86274		0.22193	0.82346
-0.57991	-0.96167		0.22105	0.86335		0.22193	0.82222
-0.57991	-0.9641		0.22034	0.86338		0.22193	0.82621
-0.58657	-0.96571		0.22034	0.86587		0.21645	0.82876
-0.58657	-0.96664		0.21567	0.86587		0.21525	0.83031
-0.59334	-0.96558		0.21387	0.86147		0.21525	0.82792
-0.59334	-0.96444		0.21357	0.861		0.21132	0.82073
-0.60007	-0.96473		0.21357	0.863		0.20964	0.81532
-0.60542	-0.96633		0.20866	0.86039		0.20899	0.81768
-0.60669	-0.96829		0.20707	0.85771		0.20899	0.82173
-0.6125	-0.97135		0.20707	0.85479		0.20431	0.82493
-0.61337	-0.97178		0.20707	0.85608		0.20252	0.82242
-0.61949	-0.96876		0.20153	0.86125		0.20231	0.82206
-0.61997	-0.96648		0.20034	0.86248		0.20231	0.82336
-0.62655	-0.96759		0.20034	0.85974		0.19719	0.82353
-0.62659	-0.9696		0.20034	0.85766		0.1956	0.82691
-0.63328	-0.97056		0.1943	0.85674		0.1956	0.827
-0.63328	-0.97103		0.19346	0.85844		0.1956	0.82424
-0.64006	-0.96964		0.19346	0.86023		0.19018	0.82355
-0.64006	-0.96938		0.18898	0.8614		0.18908	0.82675
-0.64669	-0.97139		0.18721	0.86273		0.18908	0.82691
-0.64669	-0.97177		0.18675	0.86086		0.18493	0.82263
-0.65352	-0.9716		0.18675	0.85281		0.18318	0.81498
-0.65352	-0.97262		0.18201	0.84789		0.18244	0.81005
-0.66035	-0.97262		0.18033	0.84599		0.18244	0.81456
-0.66035	-0.97331		0.18033	0.84625		0.17779	0.82134
-0.66704	-0.97508		0.18033	0.84682		0.17599	0.82725
-0.67235	-0.97324		0.17496	0.8439		0.17558	0.82954
-0.67365	-0.97194		0.17369	0.84326		0.17558	0.82469
-0.67943	-0.97298		0.17369	0.84832		0.17067	0.81918
-0.68036	-0.97392		0.16976	0.85261		0.16901	0.81442
-0.6865	-0.97654		0.16804	0.85518		0.16901	0.80924
-0.68722	-0.9782		0.16741	0.85101		0.16901	0.80835
-0.69359	-0.97763		0.16741	0.84436		0.16364	0.81428
-0.69385	-0.9779		0.16275	0.84131		0.16238	0.81554
-0.70053	-0.97796		0.16098	0.84037		0.16238	0.81201
-0.70053	-0.97659		0.16086	0.83961		0.16238	0.80706
-0.70711	-0.97393		0.16086	0.84188		0.15651	0.80717
-0.70711	-0.97165		0.15591	0.84637		0.15572	0.81114
-0.71396	-0.97152		0.15447	0.84547		0.15572	0.81386
-0.71396	-0.97255		0.15447	0.84107		0.15142	0.81185
-0.72074	-0.97521		0.15447	0.83308		0.14974	0.81067
-0.72073	-0.97712		0.14858	0.82963		0.14936	0.81239
-0.72751	-0.97498		0.14744	0.83211		0.14936	0.81136
-0.7275	-0.9728		0.14744	0.83238		0.14449	0.80795
-0.73409	-0.97582		0.14342	0.83103		0.14273	0.80448
-0.73409	-0.97928		0.14173	0.83162		0.14265	0.80048
-0.74112	-0.97768		0.14106	0.83449		0.14265	0.8002
-0.74649	-0.97649		0.14106	0.83568		0.13716	0.80037
-0.74789	-0.97859		0.13647	0.83234		0.13565	0.79893
-0.75351	-0.98126		0.13471	0.82692		0.13565	0.79427
-0.75477	-0.9807		0.13442	0.81981		0.13565	0.7918
-0.76061	-0.98137		0.13442	0.81517		0.13016	0.78995
-0.76156	-0.98181		0.12929	0.81748		0.1293	0.78862
-0.76769	-0.97904		0.12756	0.81949		0.1293	0.79255
-0.76842	-0.97908		0.12756	0.81969		0.12481	0.79586
-0.77478	-0.98094		0.12756	0.81485		0.12301	0.79356
-0.77524	-0.97915		0.12212	0.80945		0.12248	0.78441
-0.78183	-0.97975		0.12079	0.80339		0.12248	0.78322
-0.78198	-0.98089		0.12079	0.79629		0.11761	0.78906
-0.78869	-0.98329		0.12079	0.79254		0.11581	0.78968
-0.78869	-0.98466		0.11528	0.79308		0.11579	0.78428
-0.7953	-0.9838		0.11443	0.79356		0.11579	0.78079
-0.79529	-0.98128		0.11443	0.79223		0.11082	0.77966
-0.80191	-0.98052		0.10978	0.79181		0.10954	0.77633
-0.80191	-0.98092		0.10792	0.79023		0.10954	0.76921
-0.80851	-0.98114		0.1074	0.78753		0.10954	0.76562
-0.80851	-0.98308		0.1074	0.78762		0.10355	0.76936
-0.81517	-0.98278		0.1028	0.78278		0.10262	0.7739
-0.82054	-0.97983		0.10119	0.77764		0.10262	0.77351
-0.822	-0.97956		0.10119	0.77582		0.09815	0.7661
-0.82757	-0.97976		0.10119	0.77485		0.09636	0.76054
-0.82871	-0.97991		0.0956	0.7726		0.09585	0.75729
-0.83462	-0.9796		0.09463	0.76959		0.09585	0.75741
-0.83553	-0.98103		0.09463	0.76744		0.09125	0.75893
-0.84163	-0.98263		0.09019	0.76284		0.08956	0.75535
-0.84221	-0.98322		0.08839	0.75775		0.08949	0.74592
-0.84867	-0.98209		0.08794	0.75371		0.08949	0.73943
-0.84883	-0.9816		0.08794	0.74664		0.08432	0.73669
-0.85538	-0.9824		0.0831	0.74073		0.08291	0.73014
-0.85537	-0.98304		0.08134	0.73839		0.08291	0.72309
-0.862	-0.98315		0.08123	0.73689		0.08291	0.71721
-0.862	-0.98246		0.08123	0.73468		0.07718	0.71122
-0.86851	-0.9826		0.07632	0.72737		0.07615	0.70857
-0.86851	-0.98583		0.07495	0.72163		0.07615	0.70994
-0.8753	-0.98703		0.07495	0.72069		0.07189	0.71012
-0.8753	-0.98579		0.07495	0.71866		0.07013	0.70425
-0.88185	-0.98413		0.0693	0.71406		0.06962	0.69637
-0.88706	-0.98451		0.06836	0.70712		0.06962	0.69504
-0.88841	-0.98594		0.06836	0.69965		0.06493	0.69688
-0.89402	-0.98433		0.06385	0.69385		0.0632	0.6938
-0.89511	-0.98315		0.06202	0.68801		0.06306	0.68725
-0.90091	-0.98335		0.06148	0.68038		0.06306	0.68259
-0.9017	-0.98314		0.06148	0.67453		0.05771	0.67645
-0.90782	-0.98418		0.05694	0.66823		0.05622	0.66881
-0.90834	-0.98643		0.05526	0.65978		0.05622	0.66261
-0.9146	-0.98529		0.05521	0.64917		0.05622	0.65402
-0.9146	-0.98367		0.05521	0.63771		0.05088	0.64568
-0.92123	-0.98616		0.05	0.6303		0.04993	0.63835
-0.92123	-0.98631		0.04862	0.62412		0.04993	0.63235
-0.92778	-0.98413		0.04862	0.61596		0.0455	0.62335
-0.92778	-0.98317		0.04862	0.60528		0.04368	0.61133
-0.93435	-0.98351		0.04269	0.59231		0.0431	0.60171
-0.93435	-0.98544		0.04166	0.58009		0.0431	0.5919
-0.94107	-0.9852		0.04166	0.56925		0.03827	0.58196
-0.94107	-0.98615		0.03741	0.5571		0.03647	0.57216
-0.9477	-0.98835		0.03568	0.54334		0.03627	0.56161
-0.9477	-0.98879		0.0351	0.52968		0.03627	0.54938
-0.95418	-0.98837		0.0351	0.51864		0.0314	0.53668
-0.95922	-0.98965		0.03056	0.5068		0.02995	0.5233
-0.96053	-0.99057		0.02886	0.49136		0.02995	0.50881
-0.96598	-0.98741		0.02861	0.47403		0.02995	0.49302
-0.96717	-0.98575		0.02861	0.4564		0.02468	0.47661
-0.97272	-0.98428		0.02356	0.44072		0.02367	0.45785
-0.97372	-0.98574		0.02201	0.42517		0.02367	0.43721
-0.97947	-0.9888		0.02201	0.40789		0.01948	0.41972
-0.98018	-0.9893		0.02201	0.38885		0.01773	0.40271
-0.98612	-0.99014		0.01667	0.36906		0.01709	0.3832
-0.98671	-0.99116		0.01566	0.34818		0.01709	0.36077
-0.99274	-0.99055		0.01566	0.32546		0.01252	0.33601
-0.99325	-0.9889		0.01161	0.30109		0.01078	0.30992
-1.00074	-0.98956		0.00993	0.27382		0.01063	0.28339
-1.00113	-0.99106		0.00923	0.24775		0.01063	0.25477
-1.00277	-0.99271		0.00923	0.22207		0.00558	0.22387
-1.00277	-0.99229		0.00154	0.1924		0.0041	0.19075
-1.00223	-0.99074		-0.00144	0.15655		0.0041	0.13805
-1.00223	-0.99098		-0.00207	0.09054		0.0041	0.05407
-0.9981	-0.98966		-0.00207	0.0092		-0.0049	-0.03086
-0.9981	-0.98837		-0.0059	-0.05714		-0.00659	-0.09043
-0.99212	-0.98846		-0.00727	-0.0963		-0.00659	-0.12118
-0.99212	-0.98871		-0.00727	-0.12001		-0.00902	-0.14418
-0.98554	-0.98671		-0.00727	-0.13837		-0.01003	-0.16696
-0.98555	-0.98466		-0.01085	-0.15732		-0.01042	-0.19045
-0.97895	-0.98602		-0.01176	-0.17822		-0.01042	-0.21324
-0.97894	-0.98744		-0.01176	-0.20166		-0.01447	-0.23766
-0.9724	-0.98573		-0.01176	-0.22598		-0.01603	-0.2631
-0.9724	-0.98437		-0.01671	-0.25058		-0.0161	-0.28938
-0.9659	-0.98498		-0.01755	-0.27755		-0.0161	-0.31569
-0.9659	-0.98512		-0.01755	-0.30331		-0.02065	-0.34
-0.95916	-0.98626		-0.02172	-0.3249		-0.02185	-0.36327
-0.9539	-0.98982		-0.02342	-0.3431		-0.02185	-0.38548
-0.95246	-0.98848		-0.02393	-0.36235		-0.02185	-0.40764
-0.94705	-0.98532		-0.02393	-0.38193		-0.02763	-0.42806
-0.94615	-0.98388		-0.02829	-0.40091		-0.02862	-0.44769
-0.94016	-0.986		-0.0299	-0.42086		-0.02862	-0.46845
-0.93964	-0.98708		-0.03003	-0.44111		-0.03269	-0.48686
-0.93326	-0.98706		-0.03003	-0.4584		-0.03436	-0.50377
-0.93311	-0.98826		-0.03528	-0.47373		-0.03492	-0.51996
-0.92646	-0.98921		-0.03683	-0.49384		-0.03492	-0.5364
-0.92646	-0.99111		-0.03683	-0.51319		-0.03966	-0.55409
-0.91975	-0.98978		-0.03683	-0.5294		-0.04144	-0.57084
-0.91975	-0.98626		-0.04242	-0.5429		-0.04144	-0.58527
-0.91328	-0.98553		-0.04361	-0.55362		-0.04144	-0.59665
-0.91328	-0.98622		-0.04361	-0.56187		-0.04704	-0.6037
-0.90645	-0.98355		-0.04785	-0.57154		-0.04858	-0.61008
-0.90646	-0.98109		-0.04966	-0.58568		-0.04858	-0.62044
-0.89991	-0.98291		-0.05027	-0.59968		-0.04858	-0.62984
-0.89991	-0.98426		-0.05027	-0.61057		-0.05434	-0.63871
-0.89337	-0.98523		-0.05507	-0.6207		-0.05526	-0.64804
-0.88818	-0.98589		-0.05687	-0.63507		-0.05526	-0.65945
-0.88679	-0.98571		-0.05711	-0.65116		-0.05982	-0.66802
-0.88119	-0.98573		-0.05711	-0.66291		-0.06165	-0.67564
-0.8803	-0.98456		-0.06246	-0.66925		-0.06207	-0.68305
-0.87421	-0.98363		-0.06406	-0.67613		-0.06207	-0.69267
-0.87365	-0.98383		-0.06406	-0.68178		-0.06682	-0.69973
-0.8672	-0.98285		-0.06406	-0.68729		-0.06853	-0.70248
-0.86696	-0.98191		-0.06979	-0.69629		-0.06854	-0.70403
-0.86033	-0.9801		-0.07089	-0.70342		-0.06854	-0.70994
-0.86033	-0.97796		-0.07089	-0.70149		-0.07394	-0.71689
-0.85359	-0.9788		-0.0749	-0.70603		-0.0754	-0.72268
-0.85359	-0.97816		-0.07658	-0.71788		-0.0754	-0.72791
-0.84688	-0.97671		-0.07709	-0.72872		-0.0754	-0.73233
-0.84688	-0.978		-0.07709	-0.73505		-0.08121	-0.73369
-0.84014	-0.98035		-0.08206	-0.74096		-0.08225	-0.73698
-0.84014	-0.9802		-0.08386	-0.7441		-0.08225	-0.74154
-0.83344	-0.97946		-0.08386	-0.74588		-0.08638	-0.74627
-0.83344	-0.98097		-0.08386	-0.74851		-0.08808	-0.75247
-0.82668	-0.97971		-0.08918	-0.75206		-0.08865	-0.75239
-0.82668	-0.97559		-0.09058	-0.75639		-0.08865	-0.75491
-0.81974	-0.97412		-0.09058	-0.75918		-0.0933	-0.75948
-0.81443	-0.9768		-0.09058	-0.76427		-0.09505	-0.7633
-0.81298	-0.97963		-0.09616	-0.76689		-0.09524	-0.76879
-0.80744	-0.9797		-0.09716	-0.76885		-0.09524	-0.77055
-0.80637	-0.98057		-0.09716	-0.77087		-0.10037	-0.77371
-0.80041	-0.97941		-0.1015	-0.77557		-0.10185	-0.77757
-0.79964	-0.97737		-0.10329	-0.78302		-0.10185	-0.77992
-0.79339	-0.97866		-0.10369	-0.79003		-0.10185	-0.78013
-0.79287	-0.98055		-0.10369	-0.79355		-0.10745	-0.78059
-0.78637	-0.97982		-0.10832	-0.79469		-0.10835	-0.78273
-0.78612	-0.97703		-0.10996	-0.79953		-0.10835	-0.78189
-0.77926	-0.97616		-0.10996	-0.8067		-0.11281	-0.77875
-0.77909	-0.97736		-0.10996	-0.81126		-0.1146	-0.78482
-0.77217	-0.97839		-0.11533	-0.81238		-0.11511	-0.79656
-0.77202	-0.98061		-0.1166	-0.81572		-0.11511	-0.80053
-0.76534	-0.9817		-0.1166	-0.82077		-0.11973	-0.80127
-0.76533	-0.98071		-0.1166	-0.82291		-0.12144	-0.80499
-0.7584	-0.97714		-0.12239	-0.82544		-0.1215	-0.80674
-0.7584	-0.97437		-0.12329	-0.82428		-0.1215	-0.80603
-0.75138	-0.97334		-0.12329	-0.82192		-0.12677	-0.80381
-0.75138	-0.97473		-0.12783	-0.82005		-0.12823	-0.80374
-0.74478	-0.97532		-0.12965	-0.82105		-0.12823	-0.81175
-0.74478	-0.97388		-0.13009	-0.82729		-0.12823	-0.82046
-0.73812	-0.97265		-0.1301	-0.84018		-0.13395	-0.82466
-0.73812	-0.97397		-0.13491	-0.84282		-0.13494	-0.82461
-0.73142	-0.97379		-0.13655	-0.84129		-0.13494	-0.82098
-0.72622	-0.97325		-0.13655	-0.8437		-0.13904	-0.81866
-0.72497	-0.97156		-0.13655	-0.84318		-0.14071	-0.81432
-0.71911	-0.97148		-0.14164	-0.83728		-0.14136	-0.8092
-0.71822	-0.9726		-0.14277	-0.83272		-0.14136	-0.81316
-0.71207	-0.97208		-0.14277	-0.83326		-0.14604	-0.82323
-0.71158	-0.97295		-0.14682	-0.83651		-0.14783	-0.83138
-0.7051	-0.97241		-0.14856	-0.84059		-0.14819	-0.83008
-0.7051	-0.96909		-0.14903	-0.84418		-0.14819	-0.82538
-0.69844	-0.96817		-0.14903	-0.84641		-0.15292	-0.82782
-0.69845	-0.96847		-0.15378	-0.85275		-0.15455	-0.82925
-0.69161	-0.96948		-0.15551	-0.85489		-0.15455	-0.82876
-0.69161	-0.96936		-0.15551	-0.85323		-0.15455	-0.82977
-0.685	-0.96808		-0.15551	-0.85064		-0.16013	-0.83165
-0.685	-0.96896		-0.16089	-0.84805		-0.16146	-0.83343
-0.67831	-0.9684		-0.16207	-0.84668		-0.16146	-0.83757
-0.67327	-0.96607		-0.16207	-0.84825		-0.16146	-0.83798
-0.67167	-0.96588		-0.16207	-0.85486		-0.16685	-0.83506
-0.66615	-0.96626		-0.16788	-0.85773		-0.16764	-0.82989
-0.66493	-0.9674		-0.16866	-0.86015		-0.16764	-0.8303
-0.6591	-0.96708		-0.16866	-0.86287		-0.17223	-0.836
-0.65827	-0.96615		-0.17308	-0.86691		-0.17405	-0.83659
-0.65209	-0.96683		-0.17482	-0.86834		-0.17445	-0.83658
-0.65172	-0.96601		-0.17517	-0.86895		-0.17445	-0.83498
-0.64497	-0.96422		-0.17517	-0.87063		-0.17917	-0.8335
-0.64497	-0.9634		-0.18011	-0.86463		-0.18077	-0.82929
-0.63832	-0.96326		-0.18184	-0.86181		-0.18077	-0.8237
-0.63832	-0.96417		-0.18184	-0.86194		-0.18077	-0.82434
-0.63154	-0.96394		-0.18184	-0.86408		-0.18604	-0.82992
-0.63153	-0.9642		-0.18688	-0.86971		-0.18712	-0.83236
-0.6246	-0.96508		-0.18819	-0.87185		-0.18712	-0.83372
-0.6246	-0.96381		-0.18819	-0.87174		-0.19142	-0.83331
-0.61797	-0.96351		-0.18819	-0.87251		-0.19323	-0.83632
-0.61797	-0.9634		-0.19383	-0.87291		-0.19395	-0.84202
-0.61133	-0.96202		-0.19481	-0.87323		-0.19395	-0.84584
-0.61133	-0.9616		-0.19481	-0.87679		-0.19837	-0.84258
-0.60452	-0.96035		-0.19903	-0.88303		-0.20007	-0.83718
-0.59925	-0.95814		-0.20075	-0.88634		-0.20036	-0.84003
-0.59793	-0.9579		-0.20119	-0.88489		-0.20036	-0.84373
-0.5922	-0.9603		-0.20119	-0.88088		-0.20519	-0.84203
-0.5914	-0.96274		-0.20603	-0.87773		-0.20677	-0.84087
-0.58513	-0.96022		-0.20779	-0.87938		-0.20677	-0.83736
-0.5847	-0.95804		-0.20779	-0.88056		-0.20677	-0.83781
-0.57814	-0.96109		-0.20779	-0.88407		-0.21229	-0.84186
-0.5779	-0.96361		-0.2133	-0.88864		-0.21357	-0.83948
-0.5711	-0.96174		-0.21472	-0.89031		-0.21357	-0.83727
-0.5711	-0.96085		-0.21472	-0.88963		-0.21357	-0.84562
-0.56443	-0.9606		-0.21849	-0.89231		-0.21941	-0.85306
-0.56443	-0.95878		-0.22018	-0.89093		-0.22028	-0.85789
-0.55774	-0.95846		-0.22092	-0.88934		-0.22029	-0.86048
-0.55774	-0.95907		-0.22092	-0.88967		-0.22443	-0.85627
-0.55102	-0.9588		-0.22549	-0.89244		-0.22609	-0.85415
-0.55102	-0.95798		-0.22726	-0.89657		-0.22662	-0.8534
-0.54446	-0.95654		-0.22752	-0.89516		-0.22662	-0.85254
-0.54446	-0.95526		-0.22752	-0.89215		-0.23151	-0.85554
-0.5378	-0.95504		-0.23231	-0.8903		-0.23333	-0.85882
-0.53251	-0.95441		-0.23384	-0.88715		-0.2336	-0.85481
-0.5313	-0.95376		-0.23384	-0.88769		-0.2336	-0.84966
-0.52549	-0.95343		-0.23384	-0.88812		-0.23834	-0.85182
-0.52457	-0.95463		-0.2394	-0.88559		-0.23987	-0.85789
-0.51851	-0.95565		-0.2407	-0.88189		-0.23987	-0.85726
-0.51767	-0.954		-0.2407	-0.87808		-0.23987	-0.85431
-0.51154	-0.95419		-0.2407	-0.87777		-0.24535	-0.85357
-0.51097	-0.95319		-0.24628	-0.88463		-0.24654	-0.85162
-0.50452	-0.95106		-0.24709	-0.88672		-0.24654	-0.84864
-0.5044	-0.95032		-0.24709	-0.8822		-0.24654	-0.85516
-0.49787	-0.95035		-0.25148	-0.88251		-0.25255	-0.86306
-0.49787	-0.94927		-0.25322	-0.885		-0.25341	-0.86161
-0.4913	-0.95012		-0.25368	-0.88401		-0.25341	-0.85826
-0.4913	-0.95274		-0.25368	-0.88727		-0.25757	-0.85703
-0.48458	-0.95017		-0.25839	-0.89249		-0.25923	-0.85819
-0.48458	-0.94665		-0.26011	-0.89533		-0.25955	-0.85834
-0.47805	-0.94634		-0.26014	-0.89451		-0.25955	-0.85991
-0.47805	-0.94691		-0.26014	-0.89367		-0.26457	-0.86025
-0.47131	-0.94656		-0.26543	-0.89343		-0.26612	-0.85769
-0.47131	-0.94611		-0.26681	-0.89414		-0.26612	-0.84946
-0.46441	-0.949		-0.26681	-0.89906		-0.26612	-0.84803
-0.45903	-0.94934		-0.26681	-0.89837		-0.27152	-0.85324
-0.45757	-0.94674		-0.27225	-0.8934		-0.27249	-0.85638
-0.45209	-0.94553		-0.27318	-0.89172		-0.27249	-0.85255
-0.45103	-0.94492		-0.27318	-0.89375		-0.27655	-0.84831
-0.44506	-0.94462		-0.27757	-0.88928		-0.27822	-0.84797
-0.44425	-0.94349		-0.27937	-0.88532		-0.27878	-0.84866
-0.43812	-0.94364		-0.27988	-0.88866		-0.27878	-0.85241
-0.43743	-0.9443		-0.27988	-0.88905		-0.28363	-0.85932
-0.43117	-0.94586		-0.28445	-0.88239		-0.28546	-0.86095
-0.43073	-0.9441		-0.28614	-0.87668		-0.28559	-0.85247
-0.42418	-0.94		-0.28618	-0.87803		-0.28559	-0.85211
-0.42418	-0.94005		-0.28618	-0.88192		-0.29066	-0.85494
-0.41752	-0.94158		-0.29139	-0.88807		-0.29206	-0.85419
-0.41752	-0.9391		-0.29271	-0.89282		-0.29206	-0.84931
-0.41086	-0.93723		-0.29271	-0.88845		-0.29206	-0.8513
-0.41086	-0.93771		-0.29271	-0.88777		-0.29736	-0.86008
-0.40419	-0.93793		-0.29827	-0.89282		-0.2982	-0.86362
-0.40419	-0.93793		-0.29924	-0.89112		-0.2982	-0.85998
-0.3974	-0.9383		-0.29924	-0.89399		-0.30257	-0.8599
-0.39741	-0.93842		-0.3035	-0.89904		-0.30432	-0.85784
-0.39059	-0.93649		-0.30524	-0.90067		-0.30486	-0.84851
-0.39059	-0.93576		-0.30584	-0.90399		-0.30486	-0.84417
-0.38394	-0.93558		-0.30584	-0.90566		-0.30962	-0.84237
-0.37885	-0.93501		-0.31063	-0.90601		-0.31139	-0.84226
-0.37738	-0.93449		-0.31243	-0.9042		-0.31156	-0.8454
-0.37189	-0.93447		-0.3127	-0.90006		-0.31156	-0.84886
-0.37074	-0.93419		-0.3127	-0.89492		-0.31654	-0.84706
-0.36494	-0.93432		-0.31768	-0.89445		-0.318	-0.84832
-0.3642	-0.93502		-0.31925	-0.89921		-0.318	-0.8521
-0.358	-0.93342		-0.31925	-0.90504		-0.318	-0.8516
-0.35759	-0.93177		-0.31925	-0.91024		-0.32341	-0.84648
-0.35105	-0.93175		-0.32434	-0.91069		-0.32452	-0.84599
-0.3509	-0.9294		-0.32546	-0.90535		-0.32452	-0.84598
-0.34419	-0.92748		-0.32546	-0.902		-0.32867	-0.84346
-0.34419	-0.92682		-0.32546	-0.90105		-0.33043	-0.84304
-0.33742	-0.92727		-0.33124	-0.90278		-0.33105	-0.84313
-0.33742	-0.92845		-0.33205	-0.90687		-0.33105	-0.8427
-0.33078	-0.92731		-0.33205	-0.90823		-0.33567	-0.8484
-0.33079	-0.92472		-0.33656	-0.90359		-0.33741	-0.85732
-0.32405	-0.92344		-0.33834	-0.89942		-0.33763	-0.8647
-0.32405	-0.92354		-0.33861	-0.90221		-0.33763	-0.86549
-0.31751	-0.92289		-0.33861	-0.90766		-0.34284	-0.85967
-0.31751	-0.92259		-0.3437	-0.91383		-0.34434	-0.86199
-0.31078	-0.92195		-0.34531	-0.91766		-0.34434	-0.86814
-0.30577	-0.92266		-0.34532	-0.92157		-0.34434	-0.86686
-0.30419	-0.92156		-0.34531	-0.92263		-0.34962	-0.86293
-0.29886	-0.91799		-0.35063	-0.91851		-0.35055	-0.85546
-0.29752	-0.91601		-0.35179	-0.90904		-0.35055	-0.84883
-0.29189	-0.91468		-0.35179	-0.89861		-0.35481	-0.84873
-0.29081	-0.91435		-0.35179	-0.89874		-0.35656	-0.85078
-0.28488	-0.91478		-0.35758	-0.90136		-0.35709	-0.8504
-0.284	-0.91583		-0.35856	-0.8926		-0.35709	-0.84619
-0.27789	-0.91566		-0.35856	-0.88691		-0.36195	-0.84886
-0.27735	-0.91477		-0.36282	-0.88897		-0.36375	-0.85384
-0.2709	-0.91114		-0.36456	-0.89272		-0.36392	-0.8543
-0.27052	-0.90902		-0.3652	-0.89576		-0.36392	-0.85463
-0.26399	-0.90922		-0.3652	-0.89779		-0.36879	-0.8556
-0.26376	-0.90758		-0.3698	-0.89354		-0.37021	-0.85332
-0.25732	-0.90743		-0.37155	-0.88615		-0.37021	-0.85547
-0.25732	-0.90638		-0.3717	-0.88338		-0.37021	-0.86301
-0.25062	-0.90497		-0.3717	-0.88185		-0.37561	-0.8646
-0.25062	-0.90221		-0.37647	-0.88452		-0.37656	-0.86241
-0.24396	-0.89986		-0.37774	-0.893		-0.37656	-0.85793
-0.24396	-0.89899		-0.37774	-0.90373		-0.38083	-0.85182
-0.23747	-0.90014		-0.37774	-0.90668		-0.38258	-0.85166
-0.23747	-0.89991		-0.38369	-0.90642		-0.38314	-0.85759
-0.23065	-0.89891		-0.38473	-0.90561		-0.38314	-0.85774
-0.23065	-0.89625		-0.38473	-0.90352		-0.38793	-0.85685
-0.22376	-0.89244		-0.38898	-0.89808		-0.38971	-0.85456
-0.22376	-0.8904		-0.39072	-0.89328		-0.38996	-0.84891
-0.21681	-0.887		-0.39122	-0.88846		-0.38996	-0.84996
-0.21681	-0.88436		-0.39122	-0.8845		-0.39481	-0.85382
-0.20988	-0.88447		-0.3958	-0.88992		-0.39637	-0.85171
-0.2046	-0.88315		-0.39749	-0.8932		-0.39638	-0.85181
-0.2032	-0.88102		-0.39771	-0.89194		-0.39638	-0.85355
-0.19762	-0.8805		-0.39771	-0.89035		-0.4017	-0.85549
-0.19679	-0.88045		-0.40267	-0.89002		-0.403	-0.85677
-0.19057	-0.87623		-0.40426	-0.89252		-0.403	-0.85474
-0.19	-0.87244		-0.40426	-0.89178		-0.403	-0.84803
-0.18362	-0.87072		-0.40425	-0.88424		-0.40898	-0.84131
-0.18336	-0.86922		-0.40971	-0.88201		-0.40992	-0.83537
-0.17665	-0.86672		-0.41091	-0.88668		-0.40992	-0.83004
-0.17659	-0.86423		-0.41091	-0.88755		-0.41406	-0.83332
-0.16972	-0.86321		-0.41091	-0.88787		-0.41573	-0.83803
-0.16972	-0.8596		-0.41686	-0.89054		-0.41607	-0.84229
-0.16298	-0.85769		-0.41779	-0.89215		-0.41607	-0.84555
-0.16298	-0.85532		-0.41779	-0.8897		-0.42094	-0.84605
-0.15634	-0.85266		-0.42213	-0.88647		-0.42253	-0.85114
-0.15634	-0.84951		-0.42388	-0.88513		-0.42253	-0.85825
-0.14944	-0.84377		-0.42437	-0.89392		-0.42253	-0.86009
-0.14944	-0.83949		-0.42437	-0.90257		-0.42799	-0.85855
-0.14292	-0.83728		-0.42901	-0.90273		-0.42918	-0.8551
-0.14292	-0.83394		-0.4307	-0.90065		-0.42918	-0.85363
-0.13633	-0.82967		-0.4307	-0.89945		-0.42918	-0.85551
-0.13633	-0.82623		-0.4307	-0.89955		-0.435	-0.85691
-0.12931	-0.82149		-0.43603	-0.90073		-0.43585	-0.85447
-0.12413	-0.8153		-0.4374	-0.89894		-0.43585	-0.85323
-0.12265	-0.8104		-0.4374	-0.89161		-0.44039	-0.85209
-0.11713	-0.80575		-0.4374	-0.88555		-0.4422	-0.85229
-0.11589	-0.79921		-0.44304	-0.8877		-0.44264	-0.85372
-0.11008	-0.79491		-0.44398	-0.89257		-0.44264	-0.85558
-0.10896	-0.79063		-0.44398	-0.89225		-0.44738	-0.85675
-0.10302	-0.78524		-0.44825	-0.88555		-0.4491	-0.85483
-0.1022	-0.77824		-0.44999	-0.88313		-0.44926	-0.84976
-0.09596	-0.77053		-0.45043	-0.88556		-0.44926	-0.85204
-0.09552	-0.76297		-0.45043	-0.8879		-0.45445	-0.85651
-0.08909	-0.75483		-0.45524	-0.88725		-0.45602	-0.85759
-0.08909	-0.74784		-0.457	-0.88585		-0.45602	-0.85855
-0.08232	-0.7412		-0.45701	-0.88958		-0.45602	-0.85512
-0.08232	-0.73049		-0.45701	-0.89294		-0.46127	-0.84767
-0.07556	-0.72028		-0.46204	-0.89218		-0.46243	-0.84043
-0.07556	-0.71257		-0.46341	-0.89118		-0.46243	-0.84043
-0.06887	-0.70344		-0.46341	-0.89198		-0.46243	-0.85096
-0.06887	-0.69203		-0.46341	-0.89251		-0.46831	-0.85249
-0.06212	-0.67819		-0.4691	-0.88944		-0.46922	-0.85083
-0.06212	-0.66315		-0.47013	-0.88887		-0.46922	-0.85281
-0.05523	-0.64716		-0.47013	-0.8937		-0.47367	-0.85565
-0.05523	-0.63002		-0.47432	-0.89878		-0.47546	-0.85722
-0.04834	-0.612		-0.47605	-0.89812		-0.47599	-0.85037
-0.04834	-0.59187		-0.47664	-0.89491		-0.47599	-0.84762
-0.04146	-0.57053		-0.47664	-0.89023		-0.48078	-0.84721
-0.03635	-0.54829		-0.48153	-0.88503		-0.48255	-0.84466
-0.03512	-0.52386		-0.48336	-0.88408		-0.48262	-0.84301
-0.02957	-0.49615		-0.48359	-0.88998		-0.48262	-0.8415
-0.02873	-0.46486		-0.48359	-0.89334		-0.48765	-0.84065
-0.0227	-0.4302		-0.48839	-0.88927		-0.48911	-0.83914
-0.02232	-0.39253		-0.48991	-0.88197		-0.48911	-0.83871
-0.01581	-0.35		-0.48991	-0.8804		-0.48911	-0.83878
-0.01581	-0.30192		-0.48991	-0.88243		-0.49473	-0.83797
-0.00945	-0.24675		-0.49536	-0.88166		-0.49589	-0.83685
-0.00945	-0.16266		-0.49652	-0.88138		-0.49589	-0.83938
0.00303	-0.02624		-0.49652	-0.8867		-0.49982	-0.84596
0.00303	0.08618		-0.49652	-0.89054		-0.50149	-0.85204
0.00701	0.15867		-0.50247	-0.89177		-0.50215	-0.85319
0.00701	0.21237		-0.50325	-0.88928		-0.50215	-0.84957
0.01239	0.25997		-0.50325	-0.88815		-0.50672	-0.84144
0.01239	0.3054		-0.50785	-0.88867		-0.50847	-0.83703
0.01872	0.34839		-0.50965	-0.89099		-0.5087	-0.84073
0.01872	0.38897		-0.51002	-0.89148		-0.5087	-0.84664
0.02507	0.42694		-0.51002	-0.88791		-0.51402	-0.84794
0.02507	0.46096		-0.5147	-0.88711		-0.51561	-0.84118
0.03153	0.49205		-0.51636	-0.88999		-0.51561	-0.83389
0.03153	0.52052		-0.51636	-0.89409		-0.51561	-0.83398
0.03837	0.54769		-0.51636	-0.89417		-0.52089	-0.84214
0.04401	0.57444		-0.52195	-0.8951		-0.52196	-0.84887
0.04541	0.59862		-0.52321	-0.8991		-0.52196	-0.84851
0.05135	0.61888		-0.52321	-0.89846		-0.52628	-0.84841
0.05256	0.63729		-0.52707	-0.89634		-0.52811	-0.84459
0.05858	0.65468		-0.52874	-0.89832		-0.52874	-0.83848
0.05965	0.67074		-0.52934	-0.90197		-0.52875	-0.83268
0.06575	0.68542		-0.52934	-0.90013		-0.53313	-0.82949
0.06647	0.69959		-0.534	-0.8934		-0.53478	-0.82891
0.07287	0.71268		-0.53576	-0.88807		-0.53506	-0.83274
0.07333	0.7244		-0.53576	-0.88665		-0.53506	-0.83719
0.07997	0.73632		-0.53576	-0.88582		-0.54023	-0.83694
0.08033	0.74781		-0.54104	-0.88491		-0.54199	-0.83709
0.08687	0.75709		-0.54218	-0.88407		-0.54198	-0.83481
0.08687	0.76405		-0.54218	-0.88417		-0.54198	-0.82712
0.09364	0.77158		-0.54618	-0.88253		-0.54725	-0.81927
0.09364	0.77963		-0.54788	-0.87718		-0.54855	-0.81987
0.10033	0.78726		-0.54846	-0.87582		-0.54855	-0.82483
0.10033	0.79444		-0.54846	-0.87551		-0.54855	-0.8253
0.10703	0.80098		-0.55342	-0.87066		-0.55435	-0.82379
0.10703	0.80713		-0.55529	-0.86941		-0.55535	-0.8265
0.11367	0.81315		-0.55559	-0.87966		-0.55535	-0.83413
0.11367	0.81929		-0.55559	-0.88997		-0.55952	-0.83847
0.12033	0.82418		-0.56047	-0.8981		-0.56122	-0.83786
0.12571	0.82837		-0.56208	-0.90294		-0.56176	-0.83351
0.12701	0.83284		-0.56208	-0.90404		-0.56176	-0.8276
0.13276	0.83761		-0.56208	-0.90299		-0.5667	-0.82959
0.13374	0.84154		-0.56766	-0.90039		-0.56842	-0.83136
0.13979	0.8453		-0.56892	-0.8927		-0.56842	-0.82976
0.14073	0.84967		-0.56892	-0.88386		-0.56842	-0.82864
0.14681	0.85296		-0.56892	-0.88254		-0.57363	-0.82608
0.1474	0.85446		-0.57469	-0.88203		-0.5748	-0.82506
0.15375	0.8579		-0.57549	-0.88076		-0.5748	-0.82976
0.15396	0.86161		-0.57549	-0.87715		-0.5748	-0.83203
0.16054	0.8641		-0.58	-0.87509		-0.58058	-0.82593
0.16054	0.86711		-0.58177	-0.87974		-0.58139	-0.8244
0.16745	0.86954		-0.5822	-0.87921		-0.58139	-0.82967
0.16745	0.87392		-0.5822	-0.87651		-0.58596	-0.83362
0.17422	0.87839		-0.58702	-0.87833		-0.58777	-0.8295
0.17423	0.87957		-0.58876	-0.8782		-0.58815	-0.82271
0.18093	0.8815		-0.58876	-0.88014		-0.58815	-0.82417
0.18093	0.8841		-0.58876	-0.87997		-0.5931	-0.82719
0.18764	0.88529		-0.59412	-0.87725		-0.59488	-0.82431
0.18764	0.88526		-0.59542	-0.87933		-0.59495	-0.82174
0.1944	0.88702		-0.59542	-0.87914		-0.59495	-0.82998
0.19439	0.89061		-0.59542	-0.87434		-0.59997	-0.83402
0.20114	0.89334		-0.60115	-0.86765		-0.60133	-0.83255
0.20617	0.89505		-0.60211	-0.86582		-0.60133	-0.82443
0.20762	0.89553		-0.60211	-0.86954		-0.60133	-0.81726
0.21315	0.89483		-0.60637	-0.86761		-0.60705	-0.82205
0.21411	0.89654		-0.60811	-0.86652		-0.60796	-0.82423
0.22018	0.90008		-0.60854	-0.87376		-0.60796	-0.82533
0.22086	0.90309		-0.60854	-0.87905		-0.6124	-0.82946
0.22724	0.90499		-0.61345	-0.88353		-0.61419	-0.82909
0.22784	0.90526		-0.6152	-0.88014		-0.61456	-0.82269
0.23421	0.90687		-0.6152	-0.87261		-0.61455	-0.82067
0.23445	0.90827		-0.6152	-0.87647		-0.61959	-0.82176
0.24105	0.90926		-0.62063	-0.88579		-0.62121	-0.81728
0.24105	0.90918		-0.622	-0.88877		-0.62121	-0.82197
0.24778	0.90909		-0.622	-0.88456		-0.62121	-0.82597
0.24778	0.91195		-0.622	-0.88049		-0.62647	-0.81738
0.25443	0.91291		-0.62771	-0.8802		-0.62769	-0.81047
0.25443	0.914		-0.62867	-0.8802		-0.62769	-0.81023
0.26119	0.91474		-0.62867	-0.87951		-0.62769	-0.81556
0.26119	0.91848		-0.63301	-0.88177		-0.63366	-0.81898
0.26789	0.92021		-0.63478	-0.88057		-0.63455	-0.81922
0.26789	0.91945		-0.63532	-0.8772		-0.63455	-0.81688
0.27451	0.92066		-0.63532	-0.87425		-0.63886	-0.82138
0.27451	0.92154		-0.64005	-0.87176		-0.64058	-0.82564
0.28118	0.9221		-0.64181	-0.86669		-0.64096	-0.82573
0.2866	0.92243		-0.64195	-0.86576		-0.64096	-0.8198
0.28786	0.92283		-0.64195	-0.86127		-0.64598	-0.81832
0.29358	0.92365		-0.64691	-0.85927		-0.64779	-0.82096
0.29462	0.92466		-0.64829	-0.86224		-0.64793	-0.82487
0.30059	0.92591		-0.64829	-0.86916		-0.64793	-0.82847
0.30146	0.92773		-0.64829	-0.87004		-0.65304	-0.82697
0.30756	0.92788		-0.65422	-0.86463		-0.65435	-0.82288
0.30814	0.92712		-0.6553	-0.85925		-0.65434	-0.82095
0.31455	0.92891		-0.6553	-0.85084		-0.65829	-0.82071
0.31493	0.93198		-0.65935	-0.84673		-0.66005	-0.82091
0.32147	0.93289		-0.66102	-0.84576		-0.66065	-0.81762
0.32147	0.93294		-0.66161	-0.84647		-0.66065	-0.82326
0.32799	0.93217		-0.66161	-0.85062		-0.66557	-0.83697
0.32799	0.93313		-0.6663	-0.85567		-0.66743	-0.84674
0.33459	0.93414		-0.66807	-0.85598		-0.66759	-0.84312
0.33459	0.9343		-0.66825	-0.85662		-0.66758	-0.83019
0.34124	0.93601		-0.66825	-0.86211		-0.67254	-0.82001
0.34124	0.93689		-0.67345	-0.8646		-0.67392	-0.81522
0.34796	0.93709		-0.67502	-0.86734		-0.67392	-0.81337
0.35294	0.93803		-0.67503	-0.86511		-0.67392	-0.81289
0.35447	0.94109		-0.67503	-0.8579		-0.67987	-0.81383
0.3599	0.9419		-0.68078	-0.85558		-0.68082	-0.81747
0.36122	0.94063		-0.682	-0.86817		-0.68082	-0.82094
0.36685	0.9402		-0.682	-0.88261		-0.68522	-0.82114
0.36786	0.94009		-0.68616	-0.88873		-0.68698	-0.81344
0.37384	0.94062		-0.68793	-0.88259		-0.68746	-0.8051
0.37464	0.94218		-0.68852	-0.87208		-0.68746	-0.8071
0.38084	0.94271		-0.68852	-0.87143		-0.69209	-0.81467
0.38131	0.94158		-0.693	-0.87335		-0.69379	-0.82216
0.38789	0.94171		-0.69468	-0.87243		-0.69397	-0.82329
0.38791	0.94312		-0.69487	-0.86905		-0.69398	-0.8185
0.39453	0.94484		-0.69487	-0.86831		-0.69904	-0.81192
0.39453	0.94591		-0.70005	-0.86511		-0.70047	-0.80829
0.40121	0.94611		-0.70157	-0.86027		-0.70047	-0.81568
0.40121	0.94702		-0.70157	-0.86206		-0.70047	-0.81566
0.40811	0.94894		-0.70157	-0.86569		-0.70618	-0.81102
0.40811	0.94923		-0.70712	-0.86927		-0.70716	-0.80839
0.41495	0.94933		-0.70807	-0.86388		-0.70717	-0.81421
0.41495	0.94931		-0.70807	-0.85418		-0.71146	-0.82319
0.42184	0.94926		-0.71234	-0.85418		-0.71321	-0.82151
0.42184	0.9488		-0.71407	-0.86637		-0.71382	-0.81554
0.42874	0.94975		-0.71452	-0.86879		-0.71382	-0.81355
0.42874	0.95269		-0.71452	-0.86203		-0.71856	-0.81411
0.4356	0.95234		-0.71969	-0.85982		-0.72034	-0.82047
0.4356	0.95066		-0.72153	-0.86503		-0.72065	-0.82669
0.44216	0.95216		-0.72153	-0.87234		-0.72065	-0.8213
0.44719	0.9549		-0.72153	-0.86355		-0.72557	-0.81936
0.4487	0.95495		-0.72688	-0.85069		-0.72731	-0.82241
0.45413	0.95519		-0.72822	-0.84783		-0.72734	-0.82076
0.45549	0.95473		-0.72822	-0.85321		-0.72734	-0.81757
0.46116	0.95398		-0.72822	-0.85825		-0.73282	-0.81696
0.46224	0.95512		-0.73393	-0.86435		-0.7341	-0.81402
0.46816	0.95707		-0.73474	-0.86637		-0.7341	-0.80826
0.46884	0.95777		-0.73474	-0.86247		-0.73411	-0.80933
0.47515	0.95774		-0.73919	-0.85524		-0.74013	-0.80918
0.47554	0.9587		-0.74094	-0.85137		-0.74096	-0.81213
0.48216	0.95887		-0.74131	-0.85323		-0.74095	-0.81797
0.48231	0.95622		-0.74131	-0.85929		-0.74546	-0.82106
0.48914	0.95717		-0.74618	-0.86393		-0.74723	-0.81279
0.48922	0.95804		-0.74784	-0.86327		-0.74744	-0.8047
0.49578	0.95805		-0.74783	-0.86183		-0.74744	-0.81113
0.49577	0.95881		-0.74783	-0.85937		-0.75221	-0.81763
0.50243	0.9595		-0.75311	-0.85865		-0.75357	-0.81818
0.50243	0.96083		-0.75432	-0.85809		-0.75357	-0.81584
0.50933	0.96398		-0.75432	-0.86095		-0.75358	-0.81175
0.50933	0.96401		-0.75867	-0.863		-0.75926	-0.80772
0.51624	0.96081		-0.76056	-0.86064		-0.76025	-0.81072
0.51624	0.96106		-0.76131	-0.85817		-0.76025	-0.81686
0.5229	0.96234		-0.76131	-0.85442		-0.76485	-0.81858
0.5229	0.96232		-0.76574	-0.85254		-0.76673	-0.81265
0.52952	0.96273		-0.76744	-0.85851		-0.76727	-0.80413
0.52952	0.96411		-0.7676	-0.8648		-0.76727	-0.80309
0.53622	0.96551		-0.7676	-0.85909		-0.77199	-0.80573
0.5416	0.96559		-0.77292	-0.84847		-0.77373	-0.8158
0.54283	0.96428		-0.7743	-0.84516		-0.77385	-0.82056
0.54856	0.96479		-0.7743	-0.84546		-0.77384	-0.81816
0.54963	0.96511		-0.7743	-0.84406		-0.7792	-0.80739
0.55555	0.96543		-0.77999	-0.84395		-0.78086	-0.79626
0.55629	0.96546		-0.78104	-0.84724		-0.78086	-0.79207
0.56259	0.96449		-0.78104	-0.8491		-0.78086	-0.79524
0.56301	0.96238		-0.78518	-0.84804		-0.78609	-0.80471
0.56957	0.96278		-0.78691	-0.84589		-0.78725	-0.81164
0.56957	0.96553		-0.7875	-0.85426		-0.78725	-0.81375
0.57634	0.96701		-0.7875	-0.86386		-0.78726	-0.81172
0.57634	0.96779		-0.79226	-0.86265		-0.79341	-0.80758
0.58328	0.96757		-0.79405	-0.8562		-0.79439	-0.80451
0.58328	0.96811		-0.79432	-0.85005		-0.79439	-0.80619
0.58998	0.96748		-0.79432	-0.84758		-0.79845	-0.81057
0.58998	0.96583		-0.79934	-0.84827		-0.80009	-0.8057
0.59663	0.96719		-0.80087	-0.84729		-0.80061	-0.79539
0.59663	0.96955		-0.80087	-0.84767		-0.80061	-0.79854
0.60338	0.97034		-0.80087	-0.85264		-0.80569	-0.8039
0.60338	0.96905		-0.80647	-0.86019		-0.80759	-0.80216
0.61001	0.96851		-0.80763	-0.86007		-0.80763	-0.79893
0.61527	0.96954		-0.80763	-0.85274		-0.80763	-0.80132
0.61674	0.97163		-0.81183	-0.8504		-0.81248	-0.80526
0.62225	0.972		-0.81361	-0.85406		-0.8137	-0.80324
0.62346	0.97151		-0.81434	-0.8607		-0.81371	-0.79903
0.62921	0.97042		-0.81434	-0.8687		-0.81371	-0.79902
0.6301	0.97042		-0.81873	-0.86845		-0.81942	-0.79457
0.63621	0.97176		-0.82043	-0.86203		-0.82036	-0.79433
0.63695	0.97143		-0.82072	-0.85851		-0.82035	-0.79884
0.64321	0.97222		-0.82072	-0.85834		-0.82494	-0.80175
0.64368	0.97422		-0.82603	-0.8587		-0.8268	-0.80062
0.65026	0.97594		-0.82791	-0.85734		-0.82709	-0.79537
0.6504	0.97501		-0.82792	-0.85457		-0.82709	-0.79342
0.65708	0.9734		-0.82792	-0.85478		-0.83192	-0.79426
0.65708	0.97327		-0.83295	-0.85701		-0.83348	-0.78925
0.66372	0.97304		-0.83427	-0.85782		-0.83348	-0.78627
0.66372	0.97241		-0.83427	-0.85274		-0.83349	-0.78461
0.67035	0.9716		-0.83427	-0.84799		-0.83927	-0.77827
0.67035	0.97219		-0.83987	-0.84508		-0.84061	-0.77603
0.67715	0.9747		-0.84071	-0.84107		-0.84061	-0.77822
0.67715	0.97687		-0.84071	-0.84342		-0.84061	-0.78171
0.68386	0.97735		-0.84525	-0.85604		-0.84628	-0.79054
0.68386	0.97604		-0.84705	-0.86086		-0.84704	-0.7954
0.69051	0.97677		-0.84744	-0.85375		-0.84705	-0.79398
0.69051	0.97691		-0.84744	-0.84075		-0.85141	-0.79229
0.69734	0.97784		-0.85234	-0.83418		-0.85311	-0.79452
0.70275	0.97867		-0.85406	-0.8405		-0.85351	-0.79552
0.70397	0.97845		-0.85406	-0.84466		-0.85351	-0.79508
0.70966	0.97923		-0.85406	-0.84467		-0.85858	-0.78441
0.71053	0.97807		-0.85962	-0.8412		-0.8604	-0.77702
0.71664	0.97732		-0.86093	-0.84034		-0.86041	-0.7789
0.71715	0.97784		-0.86093	-0.84193		-0.86041	-0.78548
0.72359	0.97833		-0.86493	-0.83709		-0.86541	-0.7925
0.72378	0.97874		-0.86668	-0.83003		-0.8667	-0.79457
0.73037	0.98027		-0.86737	-0.82252		-0.8667	-0.78646
0.73037	0.98041		-0.86737	-0.82298		-0.8667	-0.78463
0.7372	0.97939		-0.87191	-0.82922		-0.87271	-0.78592
0.7372	0.97982		-0.87365	-0.83507		-0.8736	-0.78415
0.74398	0.98028		-0.8739	-0.83441		-0.8736	-0.78027
0.74398	0.9799		-0.8739	-0.83961		-0.87788	-0.78197
0.75091	0.97841		-0.87894	-0.84451		-0.87959	-0.78657
0.75091	0.97817		-0.88047	-0.85057		-0.88005	-0.78703
0.75767	0.98102		-0.88047	-0.84926		-0.88005	-0.78416
0.75767	0.98215		-0.88047	-0.84096		-0.88479	-0.77891
0.76443	0.98264		-0.8858	-0.83183		-0.88653	-0.77654
0.76443	0.98328		-0.88682	-0.82603		-0.88653	-0.78616
0.77128	0.9824		-0.88682	-0.82709		-0.88653	-0.78602
0.77128	0.98105		-0.89097	-0.83201		-0.89176	-0.78211
0.77815	0.98207		-0.8927	-0.83274		-0.89312	-0.78015
0.77815	0.98285		-0.89333	-0.82841		-0.89312	-0.77846
0.78471	0.98287		-0.89333	-0.82504		-0.89312	-0.77661
0.78471	0.98287		-0.89806	-0.82279		-0.89871	-0.77882
0.7914	0.98188		-0.89985	-0.82075		-0.89979	-0.78365
0.79652	0.98185		-0.90014	-0.82118		-0.89979	-0.78693
0.7979	0.98246		-0.90014	-0.82141		-0.90411	-0.78229
0.80342	0.98261		-0.90511	-0.8271		-0.90592	-0.77649
0.80459	0.98389		-0.90677	-0.83435		-0.90662	-0.77607
0.81031	0.98567		-0.90677	-0.83674		-0.90662	-0.77246
0.81122	0.9867		-0.90677	-0.83679		-0.91096	-0.7679
0.81711	0.98488		-0.91202	-0.83498		-0.91263	-0.76681
0.81788	0.98404		-0.91316	-0.83317		-0.91282	-0.77047
0.82407	0.98475		-0.91316	-0.83313		-0.91282	-0.77314
0.82464	0.98523		-0.91705	-0.8384		-0.91794	-0.76609
0.83097	0.98726		-0.91872	-0.84363		-0.91936	-0.7583
0.83112	0.98795		-0.91934	-0.84623		-0.91936	-0.76341
0.83761	0.98835		-0.91934	-0.84827		-0.91936	-0.77332
0.83761	0.98869		-0.92376	-0.8479		-0.92463	-0.77735
0.84418	0.9875		-0.92544	-0.84526		-0.92558	-0.77746
0.84418	0.98669		-0.92565	-0.84021		-0.92557	-0.77496
0.85057	0.98786		-0.92566	-0.82856		-0.92979	-0.769
0.85057	0.98812		-0.93081	-0.82207		-0.93153	-0.76461
0.85716	0.98897		-0.93232	-0.83199		-0.93211	-0.7654
0.85716	0.99064		-0.93232	-0.83579		-0.93212	-0.76754
0.8636	0.99072		-0.93232	-0.83828		-0.93687	-0.76779
0.86359	0.98997		-0.9376	-0.838		-0.93865	-0.76408
0.87028	0.99056		-0.93857	-0.83475		-0.93876	-0.7623
0.87028	0.99164		-0.93857	-0.83232		-0.93876	-0.76797
0.87698	0.99157		-0.94286	-0.82312		-0.94386	-0.7723
0.88224	0.99		-0.94463	-0.81474		-0.94533	-0.77084
0.88342	0.98949		-0.94521	-0.81533		-0.94532	-0.76821
0.88897	0.99105		-0.94521	-0.81661		-0.94532	-0.76832
0.88986	0.99349		-0.94972	-0.81585		-0.95076	-0.76728
0.89573	0.99398		-0.95141	-0.81796		-0.95177	-0.76183
0.89613	0.99361		-0.95165	-0.82863		-0.95177	-0.75973
0.9025	0.99357		-0.95166	-0.83929		-0.95559	-0.7586
0.90277	0.99302		-0.95668	-0.83979		-0.95717	-0.75931
0.90893	0.99502		-0.95834	-0.84603		-0.95768	-0.75987
0.90893	0.99581		-0.95833	-0.8536		-0.95768	-0.76267
0.91544	0.99331		-0.95833	-0.84997		-0.96225	-0.76037
0.91544	0.99258		-0.96354	-0.84947		-0.96396	-0.75772
0.92192	0.9924		-0.96485	-0.85495		-0.96408	-0.76001
0.92192	0.99221		-0.96484	-0.85491		-0.96408	-0.76369
0.92834	0.99264		-0.96484	-0.84801		-0.96942	-0.76434
0.92833	0.99389		-0.9703	-0.83818		-0.9708	-0.76336
0.93467	0.99382		-0.97116	-0.8374		-0.9708	-0.76151
0.93467	0.99266		-0.97116	-0.83991		-0.9708	-0.75843
0.94105	0.99376		-0.97529	-0.83208		-0.97613	-0.757
0.94609	0.99611		-0.97695	-0.82632		-0.97697	-0.75413
0.94751	0.99571		-0.9774	-0.82788		-0.97697	-0.74611
0.95274	0.99418		-0.9774	-0.83217		-0.98117	-0.74353
0.95392	0.99403		-0.98192	-0.82859		-0.98286	-0.74679
0.95933	0.99481		-0.98357	-0.82903		-0.98339	-0.74887
0.96048	0.99602		-0.98362	-0.83835		-0.9834	-0.74552
0.96594	0.99766		-0.98362	-0.85157		-0.9879	-0.74055
0.96675	0.99765		-0.98882	-0.8601		-0.98953	-0.74233
0.97252	0.99704		-0.99022	-0.85997		-0.98953	-0.75252
0.97315	0.99693		-0.99022	-0.85036		-0.98954	-0.75666
0.97912	0.99631		-0.99022	-0.84005		-0.99431	-0.75639
0.97935	0.99591		-0.99524	-0.82904		-0.99543	-0.76347
0.99061	0.99523		-0.99609	-0.82553		-0.99544	-0.76585
0.99061	0.9951		-0.9961	-0.81965		-0.99542	-0.76004
1.00306	0.99572		-1.00157	-0.81308		-1.00265	-0.75723
1.00306	0.99492		-1.00381	-0.81035		-1.00381	-0.75938
1.00578	0.99572		-1.00444	-0.81406		-1.0038	-0.75736
1.00578	0.99699		-1.00444	-0.81687		-1.00556	-0.75196
1.00607	0.99652		-1.00598	-0.81925		-1.00627	-0.74969
1.00607	0.99575		-1.00655	-0.81484		-1.00647	-0.74947
			-1.00659	-0.81361		-1.00647	-0.74463
			-1.0066	-0.81923		-1.00636	-0.73999
			-1.00652	-0.82303		-1.00632	-0.74106
			-1.00649	-0.82293		-1.0063	-0.74279
			-1.00649	-0.81795		-1.0063	-0.74478
			-1.00649	-0.80845		-1.00392	-0.74626
			-1.003	-0.79909		-1.00319	-0.74331
			-1.00231	-0.79828		-1.00319	-0.73723
			-1.00231	-0.80096		-1.00318	-0.73399
			-0.99884	-0.80642		-0.99886	-0.73578
			-0.99737	-0.81398		-0.99788	-0.74133
			-0.99687	-0.81418		-0.99788	-0.74297
			-0.99687	-0.8115		-0.99398	-0.75201
			-0.9923	-0.8107		-0.99229	-0.76106
			-0.99058	-0.81085		-0.99157	-0.76743
			-0.99041	-0.81612		-0.99157	-0.76444
			-0.99042	-0.81932		-0.98733	-0.75952
			-0.98545	-0.81654		-0.98569	-0.75648
			-0.98387	-0.81		-0.98529	-0.75347
			-0.98387	-0.80553		-0.98529	-0.75352
			-0.98387	-0.81026		-0.98056	-0.7588
			-0.97872	-0.81868		-0.97886	-0.76223
			-0.97756	-0.81821		-0.97886	-0.76094
			-0.97756	-0.81827		-0.97886	-0.76089
			-0.97756	-0.82115		-0.97364	-0.76103
			-0.97216	-0.82559		-0.9724	-0.7592
			-0.97141	-0.82607		-0.97239	-0.75692
			-0.97141	-0.82815		-0.97239	-0.75364
			-0.96685	-0.82955		-0.96688	-0.75024
			-0.96506	-0.81886		-0.96608	-0.75067
			-0.96463	-0.81581		-0.96608	-0.75242
			-0.96463	-0.82367		-0.96167	-0.7543
			-0.95984	-0.82308		-0.95992	-0.75769
			-0.9581	-0.815		-0.9594	-0.75903
			-0.95802	-0.81061		-0.9594	-0.76017
			-0.95802	-0.81746		-0.95477	-0.7626
			-0.95326	-0.82353		-0.95306	-0.76145
			-0.9519	-0.8241		-0.95288	-0.75323
			-0.9519	-0.8268		-0.95288	-0.74392
			-0.9519	-0.83262		-0.9481	-0.7428
			-0.94634	-0.83603		-0.94663	-0.74378
			-0.94535	-0.83466		-0.94663	-0.75003
			-0.94535	-0.83211		-0.94664	-0.762
			-0.94103	-0.83421		-0.94104	-0.77315
			-0.93927	-0.83405		-0.93992	-0.77553
			-0.93879	-0.83384		-0.93992	-0.77511
			-0.93879	-0.83028		-0.93603	-0.76936
			-0.93426	-0.82563		-0.9344	-0.76688
			-0.9326	-0.81967		-0.93374	-0.77442
			-0.9325	-0.81773		-0.93373	-0.77568
			-0.9325	-0.82238		-0.92898	-0.77283
			-0.92731	-0.82576		-0.92715	-0.76719
			-0.92572	-0.83143		-0.92681	-0.76383
			-0.92572	-0.83265		-0.92681	-0.7624
			-0.92572	-0.8277		-0.92217	-0.75925
			-0.92037	-0.82428		-0.92063	-0.7557
			-0.91923	-0.8285		-0.92062	-0.75592
			-0.91923	-0.83455		-0.92062	-0.7592
			-0.91923	-0.83579		-0.91499	-0.76516
			-0.91319	-0.83197		-0.91377	-0.77437
			-0.91236	-0.82928		-0.91377	-0.77576
			-0.91236	-0.83803		-0.90981	-0.7716
			-0.90812	-0.8537		-0.90811	-0.7678
			-0.90645	-0.8529		-0.90744	-0.76907
			-0.90604	-0.84364		-0.90744	-0.77202
			-0.90604	-0.83311		-0.90314	-0.77402
			-0.90135	-0.82306		-0.9015	-0.77087
			-0.89964	-0.81599		-0.90127	-0.76499
			-0.89963	-0.81398		-0.90126	-0.76051
			-0.89963	-0.81226		-0.89595	-0.76058
			-0.89439	-0.81183		-0.89435	-0.76655
			-0.89301	-0.81547		-0.89435	-0.76822
			-0.89301	-0.81978		-0.89435	-0.76436
			-0.89301	-0.82321		-0.88921	-0.76061
			-0.88742	-0.82472		-0.8883	-0.7593
			-0.88658	-0.82209		-0.8883	-0.7628
			-0.88657	-0.81874		-0.88399	-0.76362
			-0.88216	-0.8131		-0.88223	-0.76407
			-0.88041	-0.81457		-0.88169	-0.76907
			-0.87994	-0.8209		-0.88169	-0.7731
			-0.87994	-0.82388		-0.87675	-0.77739
			-0.87512	-0.8246		-0.87491	-0.78056
			-0.8734	-0.82149		-0.87473	-0.77349
			-0.8734	-0.82705		-0.87473	-0.76317
			-0.8734	-0.82745		-0.86977	-0.76284
			-0.86813	-0.82551		-0.86835	-0.7635
			-0.86679	-0.82464		-0.86835	-0.76356
			-0.86679	-0.82251		-0.86835	-0.76617
			-0.86679	-0.82666		-0.86281	-0.77052
			-0.86113	-0.8385		-0.86176	-0.76979
			-0.86012	-0.84567		-0.86176	-0.76198
			-0.86012	-0.85105		-0.85755	-0.76155
			-0.85555	-0.85288		-0.85579	-0.76296
			-0.85367	-0.84657		-0.85527	-0.76505
			-0.85323	-0.8393		-0.85527	-0.77308
			-0.85324	-0.83501		-0.85049	-0.779
			-0.84842	-0.83408		-0.84872	-0.77768
			-0.84669	-0.83589		-0.84869	-0.77083
			-0.8467	-0.83373		-0.8487	-0.76399
			-0.84669	-0.82701		-0.84352	-0.76401
			-0.84141	-0.82749		-0.84231	-0.77071
			-0.83996	-0.83471		-0.84231	-0.77568
			-0.83996	-0.8372		-0.84231	-0.77471
			-0.83996	-0.84257		-0.83652	-0.77348
			-0.83439	-0.84455		-0.83573	-0.77416
			-0.8333	-0.84183		-0.83573	-0.78275
			-0.8333	-0.84908		-0.83097	-0.78594
			-0.82908	-0.85217		-0.82909	-0.78241
			-0.82731	-0.84513		-0.82859	-0.7806
			-0.82658	-0.83757		-0.82859	-0.77898
			-0.82658	-0.83201		-0.82378	-0.77715
			-0.82197	-0.83014		-0.82205	-0.77316
			-0.82019	-0.83331		-0.82205	-0.76839
			-0.81985	-0.83615		-0.82205	-0.76147
			-0.81985	-0.84714		-0.81706	-0.76365
			-0.8151	-0.85537		-0.81575	-0.77686
			-0.8134	-0.8544		-0.81576	-0.78655
			-0.8134	-0.84989		-0.81576	-0.78321
			-0.8134	-0.84874		-0.81008	-0.77331
			-0.808	-0.8467		-0.80916	-0.77439
			-0.8067	-0.84511		-0.80916	-0.78271
			-0.8067	-0.84513		-0.80451	-0.78118
			-0.80669	-0.84274		-0.80263	-0.77956
			-0.80091	-0.84926		-0.80218	-0.77726
			-0.80011	-0.85208		-0.80218	-0.7789
			-0.80011	-0.85049		-0.79758	-0.77711
			-0.79558	-0.85107		-0.79592	-0.77209
			-0.7938	-0.85214		-0.79588	-0.76869
			-0.79341	-0.8506		-0.79587	-0.76689
			-0.79342	-0.85453		-0.79055	-0.77119
			-0.7886	-0.85619		-0.78938	-0.77712
			-0.78691	-0.86157		-0.78937	-0.77663
			-0.78691	-0.86658		-0.78939	-0.76882
			-0.78691	-0.86241		-0.78347	-0.76604
			-0.78146	-0.85507		-0.78262	-0.77127
			-0.78018	-0.84729		-0.78262	-0.77224
			-0.78018	-0.84123		-0.77789	-0.77458
			-0.78018	-0.84351		-0.77601	-0.78385
			-0.77426	-0.85183		-0.7755	-0.79219
			-0.77341	-0.8567		-0.7755	-0.79032
			-0.77341	-0.85918		-0.77081	-0.78761
			-0.76889	-0.85822		-0.76909	-0.78691
			-0.76711	-0.84677		-0.76893	-0.79107
			-0.76676	-0.83958		-0.76893	-0.79644
			-0.76676	-0.83815		-0.76391	-0.79809
			-0.7619	-0.83534		-0.7625	-0.79672
			-0.76025	-0.83951		-0.7625	-0.79575
			-0.76025	-0.84929		-0.7625	-0.79383
			-0.76025	-0.85694		-0.75672	-0.79199
			-0.75463	-0.86095		-0.75582	-0.78875
			-0.75331	-0.8638		-0.75582	-0.78698
			-0.75331	-0.86386		-0.75143	-0.78641
			-0.7533	-0.86087		-0.74968	-0.78555
			-0.74754	-0.86092		-0.74917	-0.79034
			-0.74673	-0.86441		-0.74917	-0.79295
			-0.74672	-0.86644		-0.74441	-0.79822
			-0.74242	-0.86217		-0.74269	-0.80558
			-0.74073	-0.85025		-0.74269	-0.80422
			-0.74031	-0.845		-0.74269	-0.79802
			-0.74031	-0.8477		-0.73722	-0.79675
			-0.73535	-0.84386		-0.736	-0.79296
			-0.73355	-0.84179		-0.736	-0.78956
			-0.73344	-0.84356		-0.73172	-0.78945
			-0.73344	-0.85085		-0.72988	-0.79505
			-0.72809	-0.85589		-0.72914	-0.80025
			-0.72657	-0.85186		-0.72914	-0.79894
			-0.72657	-0.85161		-0.72454	-0.78799
			-0.72657	-0.86004		-0.72277	-0.77807
			-0.72122	-0.86481		-0.72253	-0.78119
			-0.72026	-0.86409		-0.72253	-0.78689
			-0.72026	-0.86274		-0.71779	-0.78818
			-0.71576	-0.8617		-0.71631	-0.78607
			-0.71391	-0.86047		-0.71631	-0.78559
			-0.71345	-0.86737		-0.71631	-0.78744
			-0.71344	-0.86978		-0.7108	-0.78609
			-0.70869	-0.86425		-0.70957	-0.79007
			-0.70712	-0.8604		-0.70956	-0.79558
			-0.70712	-0.86179		-0.70547	-0.80018
			-0.70713	-0.86762		-0.7037	-0.80351
			-0.70143	-0.87232		-0.70295	-0.80418
			-0.70028	-0.87039		-0.70295	-0.80511
			-0.70028	-0.86925		-0.69813	-0.80638
			-0.69613	-0.86922		-0.69626	-0.80573
			-0.69437	-0.86602		-0.6959	-0.80086
			-0.69369	-0.86351		-0.6959	-0.80033
			-0.69369	-0.86658		-0.69122	-0.80373
			-0.68915	-0.87396		-0.68962	-0.80737
			-0.68741	-0.87659		-0.68962	-0.80987
			-0.68711	-0.8752		-0.68962	-0.81004
			-0.68711	-0.87651		-0.68392	-0.8079
			-0.68199	-0.86959		-0.68266	-0.80944
			-0.6803	-0.86306		-0.68266	-0.81908
			-0.6803	-0.86381		-0.67867	-0.82339
			-0.6803	-0.86876		-0.67695	-0.82152
			-0.67511	-0.86973		-0.67632	-0.8161
			-0.67397	-0.87137		-0.67632	-0.816
			-0.67397	-0.86899		-0.67156	-0.81728
			-0.67397	-0.86327		-0.66975	-0.80995
			-0.66776	-0.85931		-0.66958	-0.80053
			-0.66691	-0.86112		-0.66958	-0.79807
			-0.66691	-0.86881		-0.66437	-0.80297
			-0.66247	-0.87501		-0.66291	-0.80916
			-0.66072	-0.87962		-0.66291	-0.81288
			-0.66037	-0.88282		-0.66291	-0.81431
			-0.66037	-0.877		-0.65721	-0.81156
			-0.65543	-0.8687		-0.65627	-0.8052
			-0.6538	-0.86583		-0.65627	-0.7971
			-0.6538	-0.87008		-0.65192	-0.79474
			-0.6538	-0.87099		-0.65016	-0.79808
			-0.64828	-0.86916		-0.64959	-0.80131
			-0.64714	-0.869		-0.64959	-0.80648
			-0.64714	-0.87331		-0.64478	-0.80888
			-0.64315	-0.88093		-0.64298	-0.80426
			-0.64146	-0.88543		-0.64284	-0.79778
			-0.64092	-0.88711		-0.64284	-0.79334
			-0.64092	-0.88935		-0.63775	-0.79653
			-0.63609	-0.88773		-0.63631	-0.80715
			-0.63429	-0.87855		-0.63631	-0.81216
			-0.63422	-0.87128		-0.63632	-0.81435
			-0.63422	-0.87241		-0.63071	-0.8127
			-0.62903	-0.87471		-0.62978	-0.80903
			-0.62762	-0.87747		-0.62978	-0.80979
			-0.62762	-0.88179		-0.62549	-0.81524
			-0.62762	-0.88288		-0.62375	-0.81944
			-0.6221	-0.88084		-0.62326	-0.82013
			-0.62114	-0.88289		-0.62327	-0.81601
			-0.62114	-0.87815		-0.61859	-0.81419
			-0.6168	-0.871		-0.61687	-0.81537
			-0.61501	-0.86871		-0.6168	-0.81557
			-0.6144	-0.86938		-0.6168	-0.82005
			-0.6144	-0.87062		-0.61168	-0.82671
			-0.60971	-0.87351		-0.6103	-0.8264
			-0.60795	-0.87595		-0.61031	-0.8172
			-0.60768	-0.87374		-0.61031	-0.8079
			-0.60767	-0.87204		-0.60439	-0.80354
			-0.60257	-0.87308		-0.60329	-0.80563
			-0.6009	-0.87624		-0.60329	-0.8034
			-0.6009	-0.87857		-0.59906	-0.79877
			-0.60091	-0.88023		-0.59731	-0.80189
			-0.59533	-0.87796		-0.59677	-0.81343
			-0.59422	-0.87522		-0.59677	-0.81608
			-0.59422	-0.8762		-0.59188	-0.81032
			-0.5902	-0.88091		-0.59006	-0.80922
			-0.58851	-0.88486		-0.58996	-0.81721
			-0.58785	-0.88065		-0.58995	-0.82484
			-0.58785	-0.87877		-0.58509	-0.82517
			-0.58312	-0.88319		-0.58384	-0.82137
			-0.5813	-0.87979		-0.58384	-0.81874
			-0.58098	-0.86755		-0.58383	-0.82168
			-0.58098	-0.85948		-0.57775	-0.82192
			-0.576	-0.85991		-0.57673	-0.81909
			-0.57425	-0.862		-0.57673	-0.81639
			-0.57425	-0.8645		-0.57266	-0.81473
			-0.57425	-0.87169		-0.571	-0.81671
			-0.56877	-0.87924		-0.57055	-0.81544
			-0.56753	-0.88367		-0.57054	-0.81493
			-0.56753	-0.88076		-0.56556	-0.81761
			-0.56344	-0.87785		-0.56373	-0.81756
			-0.56167	-0.88189		-0.56366	-0.8161
			-0.56099	-0.88402		-0.56366	-0.8142
			-0.56099	-0.88241		-0.5586	-0.80884
			-0.55644	-0.88419		-0.55727	-0.8051
			-0.55469	-0.89178		-0.55727	-0.80775
			-0.55458	-0.89214		-0.55727	-0.80739
			-0.55458	-0.88426		-0.55134	-0.80392
			-0.5495	-0.87813		-0.55039	-0.8039
			-0.54817	-0.88149		-0.55039	-0.81127
			-0.54817	-0.88322		-0.54613	-0.82002
			-0.54817	-0.87276		-0.54442	-0.82215
			-0.54231	-0.86579		-0.54382	-0.82303
			-0.54145	-0.8718		-0.54382	-0.81907
			-0.54145	-0.88118		-0.53908	-0.81348
			-0.53716	-0.88474		-0.5373	-0.81196
			-0.53546	-0.88817		-0.53707	-0.81257
			-0.53507	-0.89156		-0.53707	-0.81877
			-0.53507	-0.88986		-0.53216	-0.83366
			-0.53015	-0.88512		-0.53066	-0.83906
			-0.52837	-0.8787		-0.53066	-0.83052
			-0.52836	-0.8726		-0.53066	-0.82361
			-0.52836	-0.8717		-0.52529	-0.82097
			-0.52324	-0.87171		-0.52417	-0.81891
			-0.52197	-0.87178		-0.52417	-0.81261
			-0.52196	-0.87666		-0.51977	-0.81075
			-0.52196	-0.88313		-0.5179	-0.8146
			-0.51626	-0.88968		-0.51716	-0.81998
			-0.51528	-0.89023		-0.51716	-0.8268
			-0.51528	-0.88403		-0.51273	-0.82467
			-0.5109	-0.88214		-0.51103	-0.81399
			-0.50911	-0.88242		-0.51075	-0.80671
			-0.50851	-0.87881		-0.51075	-0.80497
			-0.50851	-0.87364		-0.50562	-0.80975
			-0.50395	-0.87032		-0.5039	-0.81814
			-0.50224	-0.86992		-0.5039	-0.82492
			-0.50196	-0.87061		-0.5039	-0.82621
			-0.50196	-0.87062		-0.49889	-0.82334
			-0.49694	-0.86957		-0.49784	-0.82048
			-0.49517	-0.8724		-0.49784	-0.82069
			-0.49516	-0.87681		-0.49784	-0.81984
			-0.49515	-0.87565		-0.49192	-0.81549
			-0.48993	-0.87565		-0.49108	-0.81446
			-0.48865	-0.88013		-0.49108	-0.81867
			-0.48865	-0.88358		-0.48654	-0.82369
			-0.48865	-0.88286		-0.48474	-0.82497
			-0.48292	-0.88254		-0.48433	-0.82495
			-0.48208	-0.87827		-0.48433	-0.82974
			-0.48208	-0.87645		-0.47944	-0.83452
			-0.47747	-0.88207		-0.47769	-0.83483
			-0.47564	-0.88272		-0.47769	-0.83099
			-0.47531	-0.87837		-0.47769	-0.82855
			-0.47531	-0.88204		-0.47226	-0.82932
			-0.47051	-0.88355		-0.47087	-0.83001
			-0.46902	-0.8802		-0.47086	-0.833
			-0.46902	-0.88353		-0.47086	-0.83847
			-0.46903	-0.88557		-0.46547	-0.83803
			-0.46334	-0.88157		-0.46452	-0.83232
			-0.46218	-0.87546		-0.46452	-0.83608
			-0.46218	-0.87112		-0.46014	-0.84023
			-0.45819	-0.86816		-0.45833	-0.83844
			-0.45651	-0.86977		-0.45775	-0.82928
			-0.45592	-0.87368		-0.45776	-0.83336
			-0.45592	-0.87721		-0.45305	-0.84073
			-0.4513	-0.877		-0.4513	-0.83695
			-0.44955	-0.87529		-0.45121	-0.82911
			-0.44933	-0.87672		-0.45121	-0.83035
			-0.44933	-0.88375		-0.44623	-0.83086
			-0.44442	-0.89307		-0.445	-0.82617
			-0.44283	-0.89422		-0.445	-0.82584
			-0.44283	-0.89555		-0.445	-0.8254
			-0.44283	-0.89721		-0.43896	-0.82483
			-0.43731	-0.89549		-0.43804	-0.83163
			-0.43603	-0.89053		-0.43804	-0.83608
			-0.43603	-0.8832		-0.43389	-0.8293
			-0.43603	-0.87758		-0.43223	-0.82342
			-0.43011	-0.87539		-0.43177	-0.82678
			-0.42924	-0.87446		-0.43177	-0.82631
			-0.42924	-0.87688		-0.42697	-0.82379
			-0.42496	-0.87821		-0.42527	-0.82087
			-0.42327	-0.88087		-0.42527	-0.81905
			-0.42291	-0.88162		-0.42527	-0.82449
			-0.42291	-0.87954		-0.41994	-0.83501
			-0.41815	-0.87467		-0.41878	-0.83711
			-0.4165	-0.86946		-0.41878	-0.83573
			-0.4165	-0.86923		-0.41452	-0.831
			-0.4165	-0.8748		-0.4127	-0.82624
			-0.41089	-0.88004		-0.41199	-0.82457
			-0.40952	-0.88395		-0.41198	-0.82427
			-0.40952	-0.88649		-0.40743	-0.82398
			-0.40952	-0.88601		-0.40568	-0.82508
			-0.40397	-0.88839		-0.40537	-0.82624
			-0.40321	-0.88924		-0.40537	-0.82466
			-0.40321	-0.88594		-0.40039	-0.82569
			-0.39883	-0.88348		-0.39882	-0.82567
			-0.39712	-0.87905		-0.39882	-0.82861
			-0.39681	-0.87877		-0.39882	-0.82989
			-0.39681	-0.88055		-0.39343	-0.82719
			-0.39161	-0.87892		-0.39227	-0.82736
			-0.39008	-0.88386		-0.39227	-0.82848
			-0.39008	-0.89039		-0.38839	-0.8262
			-0.39008	-0.88861		-0.38673	-0.82548
			-0.3846	-0.88487		-0.3861	-0.82853
			-0.38348	-0.87553		-0.3861	-0.83066
			-0.38348	-0.87029		-0.38153	-0.82903
			-0.3794	-0.87089		-0.37978	-0.82898
			-0.37766	-0.8719		-0.37954	-0.83327
			-0.37693	-0.87314		-0.37954	-0.83529
			-0.37693	-0.87402		-0.3744	-0.83308
			-0.37253	-0.87367		-0.37283	-0.83047
			-0.37083	-0.87659		-0.37283	-0.8327
			-0.37047	-0.88266		-0.37283	-0.83143
			-0.37047	-0.88793		-0.36749	-0.8276
			-0.36567	-0.88836		-0.36649	-0.82808
			-0.36399	-0.88762		-0.36649	-0.8344
			-0.36399	-0.8887		-0.36206	-0.83769
			-0.36399	-0.88838		-0.36023	-0.83756
			-0.3586	-0.88376		-0.3597	-0.84132
			-0.3573	-0.87882		-0.35969	-0.84296
			-0.3573	-0.8779		-0.35507	-0.84365
			-0.3573	-0.87831		-0.35335	-0.84432
			-0.35137	-0.87616		-0.35328	-0.84318
			-0.35043	-0.87072		-0.35328	-0.83564
			-0.35043	-0.86806		-0.34829	-0.82868
			-0.34635	-0.86895		-0.34688	-0.82906
			-0.34471	-0.87205		-0.34688	-0.83378
			-0.34404	-0.875		-0.34688	-0.8365
			-0.34404	-0.87748		-0.34144	-0.83004
			-0.33934	-0.88118		-0.34044	-0.82513
			-0.33753	-0.88613		-0.34044	-0.83069
			-0.33718	-0.88675		-0.33615	-0.83558
			-0.33718	-0.88827		-0.33438	-0.83746
			-0.33226	-0.89284		-0.33383	-0.84032
			-0.33061	-0.89322		-0.33383	-0.8381
			-0.33061	-0.89095		-0.32912	-0.83468
			-0.33061	-0.88721		-0.32737	-0.83367
			-0.32544	-0.88975		-0.32726	-0.83067
			-0.32432	-0.89205		-0.32726	-0.83474
			-0.32432	-0.88962		-0.3222	-0.8366
			-0.32025	-0.88664		-0.32088	-0.8362
			-0.31851	-0.88406		-0.32087	-0.83851
			-0.31792	-0.87982		-0.32087	-0.83534
			-0.31792	-0.87429		-0.31492	-0.83066
			-0.31322	-0.87455		-0.31387	-0.83669
			-0.31145	-0.87693		-0.31387	-0.84033
			-0.31133	-0.8808		-0.30979	-0.84073
			-0.31133	-0.88416		-0.30811	-0.84184
			-0.30611	-0.88437		-0.30754	-0.84206
			-0.30463	-0.88311		-0.30754	-0.84598
			-0.30463	-0.88286		-0.3029	-0.84619
			-0.30463	-0.88295		-0.30115	-0.83667
			-0.29929	-0.88114		-0.30102	-0.82559
			-0.29828	-0.87946		-0.30102	-0.8238
			-0.29828	-0.8784		-0.29588	-0.82453
			-0.29383	-0.87218		-0.29434	-0.8214
			-0.29198	-0.87417		-0.29434	-0.82239
			-0.29131	-0.8806		-0.29434	-0.83104
			-0.29131	-0.87916		-0.2887	-0.84095
			-0.28697	-0.87475		-0.28747	-0.84412
			-0.28532	-0.875		-0.28747	-0.84753
			-0.28509	-0.877		-0.28341	-0.85148
			-0.28509	-0.87581		-0.28165	-0.85115
			-0.28002	-0.87528		-0.28102	-0.84153
			-0.27843	-0.87803		-0.28102	-0.83109
			-0.27843	-0.87938		-0.27639	-0.82444
			-0.27843	-0.87739		-0.27464	-0.82768
			-0.27287	-0.87771		-0.27432	-0.83403
			-0.27167	-0.88132		-0.27432	-0.83366
			-0.27167	-0.87844		-0.26936	-0.83684
			-0.27167	-0.87216		-0.26779	-0.84403
			-0.26608	-0.8701		-0.26779	-0.83933
			-0.26533	-0.87308		-0.26779	-0.8346
			-0.26533	-0.87769		-0.26254	-0.83523
			-0.26086	-0.87728		-0.26149	-0.83792
			-0.2591	-0.87278		-0.26149	-0.84333
			-0.25872	-0.8687		-0.25732	-0.84346
			-0.25872	-0.8688		-0.25557	-0.84253
			-0.25387	-0.87069		-0.25491	-0.84375
			-0.25223	-0.87307		-0.25491	-0.84108
			-0.25223	-0.87677		-0.25045	-0.83558
			-0.25223	-0.87742		-0.24875	-0.83425
			-0.24681	-0.87575		-0.24851	-0.83223
			-0.24577	-0.87458		-0.24851	-0.8312
			-0.24577	-0.87356		-0.24351	-0.83028
			-0.2415	-0.87182		-0.24203	-0.82699
			-0.23973	-0.874		-0.24203	-0.82846
			-0.23934	-0.87599		-0.24203	-0.82344
			-0.23934	-0.87627		-0.23645	-0.81851
			-0.23438	-0.87285		-0.23541	-0.82052
			-0.23272	-0.86995		-0.23541	-0.82258
			-0.23272	-0.86756		-0.23127	-0.82475
			-0.23272	-0.86346		-0.22955	-0.83073
			-0.22738	-0.8604		-0.22892	-0.83363
			-0.22618	-0.86067		-0.22892	-0.83948
			-0.22618	-0.86031		-0.22407	-0.84156
			-0.22618	-0.85917		-0.22222	-0.84436
			-0.22052	-0.8593		-0.22189	-0.84287
			-0.2197	-0.86046		-0.22189	-0.84081
			-0.2197	-0.86238		-0.21719	-0.83895
			-0.21524	-0.86587		-0.21563	-0.84012
			-0.21348	-0.86575		-0.21563	-0.83966
			-0.21304	-0.86434		-0.21563	-0.83317
			-0.21304	-0.86984		-0.21016	-0.82969
			-0.20802	-0.87155		-0.20899	-0.83065
			-0.20625	-0.86767		-0.20899	-0.83291
			-0.20625	-0.86258		-0.2047	-0.83465
			-0.20624	-0.85933		-0.20286	-0.8326
			-0.2009	-0.85981		-0.20209	-0.8345
			-0.19956	-0.86521		-0.20209	-0.83826
			-0.19956	-0.86461		-0.19757	-0.83669
			-0.19956	-0.86131		-0.19581	-0.83324
			-0.19409	-0.85828		-0.19563	-0.82759
			-0.19324	-0.8581		-0.19563	-0.82454
			-0.19324	-0.85917		-0.19056	-0.82302
			-0.18878	-0.85692		-0.18923	-0.82253
			-0.18699	-0.85467		-0.18923	-0.82443
			-0.18645	-0.84948		-0.18923	-0.82704
			-0.18645	-0.8432		-0.18353	-0.82529
			-0.18182	-0.84291		-0.18259	-0.82674
			-0.1801	-0.84512		-0.18259	-0.82886
			-0.17997	-0.84606		-0.17834	-0.82629
			-0.17997	-0.84799		-0.17661	-0.82555
			-0.17472	-0.84657		-0.17609	-0.8221
			-0.17332	-0.8404		-0.17609	-0.82194
			-0.17331	-0.83709		-0.17156	-0.82275
			-0.17331	-0.83777		-0.16988	-0.82257
			-0.16764	-0.84257		-0.16978	-0.8183
			-0.16664	-0.8467		-0.16978	-0.81521
			-0.16664	-0.8486		-0.16465	-0.81506
			-0.16249	-0.84796		-0.16327	-0.81484
			-0.16079	-0.846		-0.16327	-0.80909
			-0.16036	-0.84195		-0.16327	-0.80915
			-0.16036	-0.83845		-0.15763	-0.8112
			-0.15539	-0.8334		-0.15668	-0.81052
			-0.15358	-0.82691		-0.15668	-0.81005
			-0.15358	-0.8271		-0.15223	-0.81152
			-0.15358	-0.82646		-0.15042	-0.81353
			-0.14834	-0.82569		-0.14989	-0.81567
			-0.1469	-0.82703		-0.14989	-0.81151
			-0.1469	-0.82755		-0.14526	-0.80524
			-0.1469	-0.82451		-0.14354	-0.80341
			-0.14156	-0.81953		-0.14335	-0.80442
			-0.14053	-0.81707		-0.14335	-0.80268
			-0.14053	-0.82241		-0.13833	-0.80086
			-0.13641	-0.82327		-0.13685	-0.80067
			-0.13469	-0.81686		-0.13685	-0.7997
			-0.13406	-0.80818		-0.13685	-0.80222
			-0.13406	-0.8005		-0.13122	-0.80419
			-0.12936	-0.80413		-0.13011	-0.80474
			-0.12758	-0.80691		-0.13011	-0.80017
			-0.12737	-0.80809		-0.12598	-0.79568
			-0.12737	-0.80705		-0.12425	-0.79625
			-0.1221	-0.80213		-0.12376	-0.79644
			-0.12053	-0.79723		-0.12376	-0.79389
			-0.12053	-0.79338		-0.11876	-0.79142
			-0.12053	-0.79308		-0.11698	-0.79109
			-0.1151	-0.79595		-0.11698	-0.79086
			-0.11401	-0.79664		-0.11698	-0.78637
			-0.11401	-0.79163		-0.11189	-0.77946
			-0.10974	-0.7836		-0.1106	-0.77754
			-0.10793	-0.78053		-0.1106	-0.77806
			-0.10721	-0.78195		-0.10649	-0.77695
			-0.10721	-0.78183		-0.10465	-0.77381
			-0.10269	-0.77603		-0.1039	-0.77162
			-0.10095	-0.76798		-0.1039	-0.77433
			-0.10073	-0.76273		-0.09931	-0.7762
			-0.10073	-0.76		-0.09754	-0.7706
			-0.09562	-0.75963		-0.09721	-0.7608
			-0.09398	-0.75453		-0.09721	-0.75222
			-0.09398	-0.7452		-0.09227	-0.75219
			-0.09397	-0.73992		-0.09069	-0.75059
			-0.08865	-0.74025		-0.09069	-0.74771
			-0.08764	-0.74233		-0.09069	-0.74741
			-0.08764	-0.74144		-0.08537	-0.74886
			-0.08335	-0.73978		-0.08401	-0.74439
			-0.08157	-0.73594		-0.08401	-0.73526
			-0.08098	-0.73071		-0.08401	-0.72851
			-0.08098	-0.7246		-0.07823	-0.72217
			-0.07646	-0.71732		-0.0771	-0.72114
			-0.07477	-0.71187		-0.0771	-0.71992
			-0.07465	-0.70555		-0.07299	-0.7139
			-0.07465	-0.6989		-0.07126	-0.70813
			-0.0695	-0.69398		-0.0706	-0.70286
			-0.06801	-0.68922		-0.0706	-0.698
			-0.06801	-0.68565		-0.06588	-0.69377
			-0.06801	-0.68283		-0.06408	-0.6903
			-0.06217	-0.67715		-0.06384	-0.68425
			-0.0611	-0.66921		-0.06384	-0.67932
			-0.0611	-0.66028		-0.05881	-0.67433
			-0.05688	-0.65083		-0.05738	-0.66588
			-0.05513	-0.6424		-0.05738	-0.65989
			-0.05459	-0.63614		-0.05738	-0.65596
			-0.05459	-0.62748		-0.05209	-0.64756
			-0.05002	-0.61735		-0.0512	-0.63574
			-0.04832	-0.60543		-0.0512	-0.62399
			-0.04814	-0.59352		-0.0466	-0.61569
			-0.04814	-0.58212		-0.04473	-0.60699
			-0.04276	-0.56976		-0.04436	-0.59547
			-0.04109	-0.55871		-0.04436	-0.58389
			-0.04109	-0.54697		-0.03966	-0.57274
			-0.04109	-0.53434		-0.03813	-0.56299
			-0.03594	-0.52143		-0.03813	-0.55299
			-0.03491	-0.51002		-0.03813	-0.54048
			-0.03491	-0.50111		-0.03291	-0.52788
			-0.03091	-0.49013		-0.03185	-0.51528
			-0.02924	-0.47306		-0.03185	-0.49894
			-0.0286	-0.45594		-0.02753	-0.48105
			-0.0286	-0.43766		-0.02571	-0.46331
			-0.0239	-0.41828		-0.02499	-0.44667
			-0.02211	-0.39776		-0.02499	-0.42749
			-0.02175	-0.37671		-0.02055	-0.40525
			-0.02175	-0.35583		-0.01884	-0.38409
			-0.01691	-0.33537		-0.0185	-0.36376
			-0.01532	-0.3119		-0.0185	-0.34084
			-0.01532	-0.28663		-0.0137	-0.31551
			-0.01531	-0.26051		-0.01199	-0.28838
			-0.01012	-0.23309		-0.01193	-0.2599
			-0.00899	-0.20473		-0.01193	-0.22846
			-0.00899	-0.17377		-0.00328	-0.19432
			-0.0015	-0.12427		-0.000995056	-0.14634
			0.00172	-0.04906		-0.000995198	-0.06027
			0.0031	0.02679		-0.000995198	0.02647
			0.0031	0.07262		0.00366	0.0875
			0.00515	0.10372		0.00436	0.12266
			0.00595	0.12176		0.00436	0.14483
			0.0061	0.14078		0.0073	0.16519
			0.0061	0.16316		0.00847	0.18715
			0.0101	0.18754		0.00871	0.20992
			0.01146	0.2117		0.00871	0.23415
			0.01146	0.2329		0.0128	0.26026
			0.01146	0.25491		0.01424	0.28676
			0.01631	0.2784		0.01424	0.31236
			0.01764	0.30337		0.01424	0.33428
			0.01764	0.3267		0.01926	0.35544
			0.01764	0.34875		0.02056	0.37914
			0.02295	0.36984		0.02056	0.40335
			0.02397	0.38815		0.02056	0.42261
			0.02397	0.40626		0.02636	0.44218
			0.02809	0.42424		0.02719	0.46309
			0.02981	0.44163		0.02719	0.48213
			0.03055	0.45817		0.03151	0.49849
			0.03055	0.47485		0.03322	0.51551
			0.03504	0.49228		0.03373	0.53133
			0.03679	0.50904		0.03373	0.54673
			0.03712	0.52247		0.03835	0.56082
			0.03712	0.53402		0.04007	0.57402
			0.0423	0.54757		0.04017	0.58469
			0.04404	0.56012		0.04017	0.59485
			0.04404	0.57381		0.04583	0.60685
			0.04404	0.58846		0.04748	0.61702
			0.04984	0.59794		0.04748	0.62657
			0.05121	0.60683		0.04748	0.63761
			0.05121	0.61705		0.05306	0.65411
			0.05121	0.62878		0.05415	0.66642
			0.05708	0.63966		0.05415	0.67396
			0.05793	0.64721		0.05846	0.67937
			0.05794	0.65281		0.06026	0.686
			0.06254	0.66034		0.06095	0.69295
			0.06436	0.66698		0.06095	0.69536
			0.0648	0.67329		0.06581	0.69881
			0.0648	0.68154		0.06767	0.70519
			0.06946	0.69289		0.06802	0.71242
			0.07103	0.70357		0.06802	0.7215
			0.07103	0.71031		0.07304	0.72469
			0.07103	0.71467		0.07479	0.72495
			0.07646	0.71707		0.07479	0.72701
			0.07762	0.72274		0.07479	0.72896
			0.07762	0.73479		0.08007	0.73067
			0.07762	0.74429		0.08141	0.73717
			0.08351	0.75035		0.08141	0.74368
			0.08432	0.75406		0.08141	0.74378
			0.08432	0.75454		0.08718	0.74606
			0.08907	0.75536		0.08822	0.75283
			0.09093	0.75741		0.08822	0.75704
			0.09127	0.76114		0.09248	0.75813
			0.09127	0.76665		0.09424	0.75954
			0.09604	0.76997		0.09484	0.7641
			0.09753	0.76907		0.09484	0.76988
			0.09753	0.7696		0.09949	0.77459
			0.09753	0.76956		0.10124	0.77772
			0.10319	0.77127		0.10138	0.7793
			0.10424	0.77653		0.10138	0.78135
			0.10424	0.78512		0.10655	0.78498
			0.10855	0.79277		0.10802	0.79091
			0.11033	0.79725		0.10802	0.79495
			0.11087	0.79555		0.10802	0.79444
			0.11087	0.79404		0.1137	0.78597
			0.1154	0.8001		0.11461	0.78552
			0.11707	0.8076		0.11461	0.79248
			0.11707	0.80767		0.11902	0.79623
			0.11707	0.81026		0.12079	0.79857
			0.12246	0.81156		0.12138	0.79835
			0.1239	0.81142		0.12138	0.80129
			0.1239	0.81384		0.12587	0.80891
			0.1239	0.8152		0.12755	0.81418
			0.12965	0.81397		0.12781	0.81669
			0.13073	0.81366		0.12781	0.81277
			0.13073	0.81422		0.13297	0.80246
			0.135	0.81118		0.13452	0.79525
			0.13678	0.80802		0.13452	0.80105
			0.13742	0.81061		0.13452	0.81064
			0.13742	0.81601		0.14003	0.80757
			0.14188	0.82093		0.14112	0.8054
			0.14356	0.82361		0.14112	0.80958
			0.14356	0.82504		0.14524	0.81274
			0.14356	0.82768		0.14697	0.81213
			0.14899	0.82871		0.14753	0.81305
			0.1505	0.83041		0.14753	0.81224
			0.1505	0.83411		0.15237	0.81111
			0.1505	0.83975		0.15417	0.81187
			0.15576	0.84099		0.15429	0.81517
			0.1567	0.84095		0.15429	0.81775
			0.1567	0.84088		0.15928	0.82138
			0.1611	0.84128		0.16074	0.82868
			0.16291	0.84214		0.16074	0.83203
			0.16351	0.84471		0.16074	0.83103
			0.16351	0.84643		0.16612	0.83166
			0.16802	0.84664		0.16717	0.83484
			0.16971	0.84573		0.16717	0.83717
			0.16987	0.8455		0.17131	0.84112
			0.16987	0.84538		0.17305	0.84414
			0.17494	0.84864		0.17362	0.84415
			0.17636	0.85242		0.17362	0.84305
			0.17636	0.85421		0.17842	0.84097
			0.17636	0.85823		0.18022	0.84068
			0.18193	0.86125		0.18046	0.83989
			0.1829	0.86072		0.18046	0.83447
			0.1829	0.85855		0.18531	0.83522
			0.18734	0.85413		0.18665	0.83612
			0.18916	0.85451		0.18665	0.83487
			0.18969	0.85848		0.18665	0.83782
			0.18969	0.86206		0.1924	0.83999
			0.19426	0.86238		0.19338	0.83433
			0.19594	0.86115		0.19338	0.83163
			0.19611	0.85965		0.1978	0.83686
			0.19612	0.85859		0.1996	0.83988
			0.20126	0.85517		0.20003	0.84253
			0.20286	0.85337		0.20003	0.83799
			0.20286	0.85181		0.20494	0.83571
			0.20286	0.85125		0.2065	0.84005
			0.20833	0.85549		0.2065	0.84321
			0.20954	0.8597		0.2065	0.8439
			0.20954	0.86283		0.2119	0.84112
			0.21359	0.85765		0.21292	0.83982
			0.21534	0.85477		0.21292	0.84295
			0.21602	0.8576		0.21717	0.84296
			0.21602	0.85936		0.21894	0.83845
			0.22069	0.86323		0.21956	0.84217
			0.22247	0.87022		0.21956	0.84477
			0.22276	0.87051		0.22425	0.84349
			0.22276	0.86539		0.22602	0.84226
			0.22791	0.85778		0.22634	0.8444
			0.22947	0.86023		0.22634	0.84781
			0.22947	0.86456		0.2311	0.85153
			0.22947	0.86907		0.2327	0.85369
			0.23483	0.87537		0.2327	0.85788
			0.23586	0.8746		0.2327	0.86373
			0.23586	0.87184		0.2382	0.85961
			0.24017	0.87274		0.23941	0.86059
			0.24197	0.87093		0.23941	0.86076
			0.24252	0.87105		0.23941	0.85187
			0.24252	0.87986		0.24501	0.84444
			0.24698	0.88611		0.24581	0.84797
			0.24863	0.88364		0.24581	0.85228
			0.24871	0.87972		0.25021	0.85459
			0.24871	0.87351		0.25196	0.85803
			0.25415	0.8746		0.25245	0.85867
			0.2557	0.88206		0.25245	0.85612
			0.2557	0.88353		0.25734	0.85569
			0.2557	0.88159		0.25914	0.85952
			0.26096	0.88228		0.25925	0.85992
			0.26195	0.88429		0.25925	0.85711
			0.26195	0.88237		0.26423	0.85774
			0.26621	0.87458		0.26552	0.86152
			0.26798	0.86879		0.26552	0.8655
			0.26867	0.87006		0.26552	0.86524
			0.26867	0.87484		0.27132	0.86864
			0.2733	0.88148		0.27231	0.87389
			0.27507	0.88661		0.27231	0.87092
			0.27522	0.88828		0.2767	0.86459
			0.27522	0.88555		0.27849	0.86043
			0.28033	0.87843		0.27901	0.86417
			0.28183	0.87444		0.27901	0.86536
			0.28183	0.87245		0.28365	0.86118
			0.28183	0.87278		0.28536	0.85714
			0.2873	0.87781		0.2855	0.85576
			0.28836	0.88212		0.2855	0.85503
			0.28836	0.88517		0.29054	0.85405
			0.28836	0.88542		0.29196	0.85408
			0.2944	0.88317		0.29197	0.85257
			0.29519	0.88414		0.29197	0.85014
			0.29519	0.88725		0.29754	0.85265
			0.29971	0.88876		0.29863	0.85968
			0.30148	0.88602		0.29863	0.86124
			0.30176	0.87947		0.30278	0.85854
			0.30176	0.87585		0.30452	0.85049
			0.3066	0.87628		0.30522	0.84646
			0.30828	0.87695		0.30522	0.84671
			0.30828	0.87796		0.30974	0.84625
			0.30828	0.8851		0.31148	0.84088
			0.31352	0.89378		0.31171	0.84102
			0.3148	0.89805		0.31171	0.84456
			0.3148	0.89897		0.31697	0.84357
			0.3148	0.8946		0.31856	0.84134
			0.32045	0.88825		0.31856	0.8422
			0.32138	0.88542		0.31856	0.84481
			0.32138	0.88559		0.32407	0.84919
			0.32566	0.88269		0.32517	0.85684
			0.32741	0.88147		0.32517	0.85762
			0.32799	0.88404		0.32925	0.84959
			0.32799	0.88711		0.33096	0.83993
			0.33282	0.89027		0.3316	0.83271
			0.33464	0.89323		0.3316	0.83067
			0.33478	0.89544		0.33627	0.83486
			0.33478	0.89401		0.33804	0.84423
			0.33988	0.89035		0.33815	0.85142
			0.34133	0.88575		0.33815	0.84914
			0.34133	0.88036		0.34327	0.85263
			0.34133	0.87753		0.3445	0.85509
			0.347	0.88051		0.3445	0.85178
			0.34812	0.88595		0.34845	0.8467
			0.34812	0.89077		0.35017	0.84123
			0.34812	0.88466		0.3509	0.83802
			0.35388	0.8764		0.3509	0.83903
			0.3547	0.87452		0.35547	0.84203
			0.3547	0.87651		0.35725	0.84115
			0.35905	0.87925		0.35754	0.84377
			0.36078	0.88124		0.35754	0.84782
			0.36112	0.88491		0.36249	0.84468
			0.36112	0.89571		0.36404	0.83498
			0.36599	0.90834		0.36404	0.8324
			0.3676	0.91104		0.36404	0.84264
			0.3676	0.90532		0.36948	0.84716
			0.3676	0.89623		0.37069	0.8437
			0.37294	0.88721		0.37069	0.84131
			0.37404	0.88722		0.37069	0.84424
			0.37404	0.88796		0.37646	0.84501
			0.37818	0.88388		0.37733	0.84399
			0.37993	0.87821		0.37733	0.842
			0.38065	0.87417		0.38178	0.83831
			0.38065	0.87608		0.38355	0.83485
			0.38547	0.87837		0.38396	0.83119
			0.38733	0.87142		0.38396	0.82858
			0.38759	0.86512		0.38868	0.8353
			0.38759	0.87056		0.39039	0.84523
			0.3924	0.8728		0.39048	0.85024
			0.39389	0.87252		0.39048	0.8527
			0.39389	0.87111		0.39586	0.84753
			0.39389	0.874		0.39738	0.84192
			0.39934	0.8777		0.39738	0.83723
			0.40037	0.8787		0.39738	0.83448
			0.40037	0.8841		0.40281	0.83629
			0.40479	0.89134		0.40378	0.83665
			0.40662	0.89495		0.40378	0.83643
			0.40729	0.88945		0.408	0.84087
			0.40729	0.88134		0.40974	0.84755
			0.41193	0.8812		0.41032	0.84812
			0.41369	0.88192		0.41032	0.84329
			0.41398	0.88224		0.41496	0.84069
			0.41398	0.88499		0.4167	0.83793
			0.41872	0.891		0.41679	0.83356
			0.42023	0.89253		0.41679	0.8397
			0.42024	0.88939		0.42228	0.84751
			0.42024	0.88479		0.42367	0.84808
			0.42595	0.88315		0.42367	0.84125
			0.4272	0.8792		0.42367	0.83253
			0.4272	0.87337		0.42933	0.83037
			0.4272	0.87568		0.43014	0.83869
			0.43307	0.87829		0.43014	0.83851
			0.43391	0.87739		0.4344	0.83985
			0.43391	0.87703		0.43608	0.84586
			0.43826	0.87917		0.4365	0.85254
			0.43998	0.8846		0.4365	0.85358
			0.44045	0.88867		0.44156	0.85259
			0.44045	0.89002		0.4434	0.84868
			0.44504	0.88843		0.44348	0.84441
			0.44672	0.88506		0.44348	0.84604
			0.44679	0.88225		0.44856	0.84879
			0.44679	0.87872		0.45004	0.84646
			0.45218	0.87913		0.45004	0.83967
			0.45362	0.88079		0.45004	0.83728
			0.45362	0.8812		0.45566	0.83837
[truncated: 323 more rows]

## Sheet: Figure 8d
	AP			water			chloroform
1.00133	0.99888		1.00278	0.93823		1.00589	0.8984
1.00475	1		1.0077	0.93756		1.00796	0.89954
1.0055	1.00002		1.00923	0.93175		1.00796	0.8978
1.00553	1.00166		1.00923	0.9315		1.00796	0.89647
1.00553	1.00058		1.00923	0.93751		1.00895	0.89593
1.00235	0.99795		1.00913	0.93989		1.00914	0.89434
1.00207	0.99786		1.00911	0.93949		1.00914	0.88648
0.99328	1.00033		1.00911	0.939		1.00824	0.87643
0.99298	1.00002		1.00728	0.93863		1.00785	0.87413
0.98142	0.99948		1.00653	0.93417		1.00769	0.8761
0.98142	0.99969		1.00629	0.92972		1.0077	0.88127
0.9743	1.00082		1.00629	0.92384		1.00424	0.88994
0.9743	1.001		1.00222	0.91727		1.00292	0.89497
0.96796	0.99916		1.0007	0.91459		1.00273	0.89455
0.96796	0.99864		1.00063	0.91489		1.00272	0.89436
0.96163	0.99836		1.00063	0.91485		0.99593	0.89141
0.96163	0.9984		0.9915	0.91412		0.99395	0.88137
0.95516	0.99811		0.98903	0.91439		0.99395	0.88224
0.95516	0.99778		0.98903	0.92479		0.99396	0.886
0.94863	0.99924		0.98903	0.93285		0.98415	0.88473
0.94863	0.99862		0.98037	0.93358		0.98235	0.88672
0.94232	0.9981		0.97882	0.9355		0.98237	0.88578
0.93718	0.99822		0.97882	0.9446		0.9776	0.87957
0.93584	1.00032		0.97479	0.94917		0.97563	0.87651
0.93042	1.00046		0.97313	0.95026		0.97495	0.88438
0.9293	0.99715		0.97258	0.94508		0.97495	0.89593
0.9237	0.99606		0.97258	0.94245		0.97032	0.89508
0.92302	0.99862		0.96799	0.94639		0.96859	0.88711
0.9169	0.99892		0.96627	0.94805		0.96859	0.88292
0.91629	0.99762		0.9661	0.94152		0.96859	0.88663
0.91012	0.99697		0.96609	0.93317		0.96358	0.88817
0.9099	0.99369		0.96126	0.93176		0.96226	0.88366
0.90347	0.99019		0.95979	0.93374		0.96226	0.88035
0.90347	0.99074		0.95978	0.93366		0.96226	0.87758
0.897	0.99068		0.95978	0.93387		0.95693	0.87712
0.897	0.98835		0.95446	0.93428		0.9562	0.87872
0.89036	0.98944		0.95335	0.93426		0.9562	0.88494
0.89036	0.99225		0.95336	0.93174		0.95204	0.88921
0.88396	0.99142		0.94934	0.92723		0.9504	0.88508
0.88396	0.99261		0.94764	0.92248		0.94998	0.88561
0.87754	0.99289		0.94707	0.92322		0.94998	0.8865
0.87754	0.99143		0.94707	0.92732		0.94532	0.87733
0.87114	0.99106		0.94269	0.92951		0.94365	0.87102
0.86599	0.9894		0.94106	0.92781		0.94365	0.88123
0.8646	0.98833		0.94097	0.92604		0.94366	0.89352
0.85913	0.98718		0.94096	0.92637		0.93838	0.89315
0.85801	0.98826		0.93613	0.92732		0.93695	0.88669
0.85229	0.99125		0.9349	0.93015		0.93696	0.88684
0.85149	0.99032		0.9349	0.93307		0.93695	0.88874
0.84542	0.99011		0.93491	0.92927		0.93159	0.8888
0.84472	0.99239		0.92948	0.923		0.93056	0.88846
0.83851	0.9928		0.92853	0.92546		0.93057	0.89105
0.83788	0.99183		0.92853	0.93733		0.92658	0.89873
0.83159	0.99086		0.92414	0.9434		0.92491	0.90569
0.83127	0.99136		0.92234	0.94049		0.92424	0.90322
0.82473	0.99229		0.92174	0.93244		0.92424	0.90087
0.82465	0.99417		0.92173	0.92938		0.91968	0.90184
0.81796	0.99417		0.91734	0.92611		0.91793	0.90018
0.81796	0.99201		0.91569	0.92429		0.91777	0.89228
0.81125	0.9916		0.91545	0.92629		0.91777	0.88724
0.81125	0.99235		0.91545	0.93134		0.91298	0.8849
0.80448	0.98926		0.91056	0.92523		0.91158	0.88707
0.80448	0.98421		0.90893	0.92224		0.91158	0.88926
0.79776	0.98231		0.90893	0.93222		0.91158	0.88688
0.79776	0.98165		0.90893	0.93776		0.90633	0.88819
0.791	0.983		0.90377	0.92963		0.90541	0.88847
0.791	0.98419		0.9025	0.92248		0.90541	0.8823
0.7844	0.98468		0.9025	0.92266		0.90118	0.88134
0.7844	0.98601		0.9025	0.92073		0.89945	0.88962
0.77788	0.98752		0.89719	0.91948		0.89897	0.89664
0.77788	0.98921		0.89623	0.91891		0.89896	0.89917
0.77108	0.98921		0.89623	0.92501		0.89458	0.89387
0.76601	0.98618		0.89206	0.92638		0.89297	0.88808
0.76449	0.98624		0.89034	0.92542		0.89293	0.88838
0.75906	0.9878		0.88991	0.92349		0.89293	0.89361
0.75797	0.98709		0.88991	0.9286		0.88748	0.89323
0.75204	0.98379		0.88506	0.92999		0.88614	0.88917
0.7511	0.98169		0.88331	0.93006		0.88614	0.88627
0.74508	0.98304		0.88331	0.93287		0.88613	0.88261
0.74445	0.98304		0.88331	0.93237		0.88074	0.88155
0.73811	0.98294		0.87841	0.93256		0.87987	0.88191
0.73791	0.98256		0.87711	0.93159		0.87986	0.88262
0.73115	0.98244		0.87711	0.92525		0.87582	0.88451
0.73105	0.98241		0.87711	0.91816		0.87418	0.88787
0.72457	0.98143		0.87148	0.92236		0.87387	0.88672
0.72457	0.9801		0.87044	0.93177		0.87387	0.88246
0.7178	0.97842		0.87045	0.9339		0.86903	0.87977
0.7178	0.97677		0.86637	0.93535		0.8673	0.88182
0.71119	0.9775		0.86468	0.94225		0.86727	0.88286
0.71119	0.97881		0.86414	0.94399		0.86727	0.88538
0.70469	0.97642		0.86414	0.94104		0.86184	0.8899
0.70469	0.9757		0.85931	0.93835		0.86044	0.88595
0.69789	0.97543		0.85751	0.93416		0.86043	0.88001
0.69788	0.97421		0.85738	0.92328		0.86043	0.88365
0.6912	0.97445		0.85738	0.92222		0.8552	0.88707
0.68593	0.9729		0.85248	0.92817		0.85428	0.88542
0.68456	0.97412		0.85124	0.9255		0.85428	0.88005
0.67894	0.97728		0.85124	0.92188		0.84988	0.87735
0.67777	0.97784		0.84739	0.92594		0.84807	0.88398
0.67192	0.97679		0.84569	0.93046		0.84753	0.89629
0.67106	0.97553		0.84496	0.93707		0.84753	0.9034
0.66494	0.97422		0.84496	0.93791		0.84296	0.9005
0.6642	0.97401		0.84044	0.93549		0.84127	0.89148
0.65793	0.974		0.83868	0.94028		0.84123	0.88796
0.65733	0.97498		0.83835	0.94579		0.84124	0.8909
0.65094	0.97689		0.83835	0.94364		0.83625	0.89297
0.65074	0.97734		0.83346	0.94085		0.83506	0.89497
0.64415	0.97755		0.83182	0.93878		0.83506	0.89179
0.64415	0.97649		0.83182	0.93126		0.83506	0.88711
0.63752	0.97378		0.83182	0.92725		0.82919	0.88525
0.63752	0.97131		0.82669	0.93135		0.82832	0.88117
0.63069	0.97089		0.82541	0.93487		0.82832	0.87815
0.63069	0.97095		0.82541	0.93312		0.82383	0.87659
0.62416	0.97156		0.82542	0.93413		0.82204	0.88415
0.62416	0.97287		0.81995	0.93614		0.82169	0.8915
0.61758	0.97486		0.81914	0.93686		0.82169	0.89199
0.61758	0.97619		0.81914	0.94272		0.81693	0.89382
0.61087	0.97313		0.81482	0.95159		0.81535	0.89447
0.60544	0.97042		0.8131	0.94986		0.81536	0.89139
0.6042	0.96964		0.81269	0.94182		0.81535	0.88865
0.59846	0.97136		0.81268	0.93756		0.81016	0.88599
0.59774	0.97386		0.80774	0.93552		0.80896	0.88701
0.59142	0.97343		0.80604	0.94007		0.80896	0.89011
0.59105	0.97262		0.80604	0.93871		0.80896	0.89384
0.58453	0.97524		0.80604	0.9333		0.80342	0.90052
0.58453	0.97657		0.8007	0.93		0.80262	0.9035
0.57779	0.97523		0.79954	0.92636		0.80263	0.90181
0.57779	0.97378		0.79954	0.92749		0.7983	0.8954
0.5708	0.97316		0.79954	0.93751		0.79659	0.89512
0.5708	0.96783		0.79411	0.94069		0.79614	0.89904
0.56425	0.96121		0.79339	0.93246		0.79615	0.89768
0.56425	0.96343		0.79339	0.92962		0.79114	0.895
0.55726	0.96266		0.78866	0.93004		0.78932	0.89719
0.55727	0.96046		0.7868	0.92792		0.78912	0.90351
0.55038	0.96086		0.78644	0.92979		0.78913	0.90451
0.55038	0.96096		0.78644	0.92952		0.78413	0.90962
0.5438	0.96106		0.78167	0.92622		0.78256	0.91006
0.53874	0.96159		0.78015	0.9279		0.78255	0.90527
0.53726	0.96081		0.78015	0.9289		0.78256	0.89698
0.53173	0.95956		0.78015	0.93215		0.77738	0.88975
0.53049	0.95991		0.77479	0.93469		0.77613	0.88809
0.52475	0.96024		0.77376	0.92955		0.77613	0.88666
0.52379	0.95887		0.77376	0.92878		0.77613	0.88701
0.51773	0.95581		0.76949	0.9333		0.77036	0.89051
0.51689	0.95559		0.76771	0.93532		0.76934	0.89135
0.5107	0.95789		0.76705	0.93976		0.76935	0.88759
0.51001	0.95766		0.76705	0.94207		0.76509	0.8901
0.50377	0.95562		0.76256	0.94126		0.76334	0.89179
0.50349	0.95449		0.76085	0.93905		0.76283	0.88664
0.49677	0.95705		0.76054	0.94018		0.76283	0.8817
0.49677	0.95578		0.76055	0.94166		0.75808	0.88114
0.48998	0.95388		0.7554	0.94166		0.75634	0.88452
0.48998	0.95659		0.75364	0.93898		0.75634	0.89002
0.48329	0.956		0.75364	0.94176		0.75634	0.89315
0.48329	0.95436		0.75364	0.94312		0.75121	0.89127
0.47676	0.95539		0.74861	0.93535		0.75	0.88915
0.47676	0.95609		0.74738	0.92995		0.75	0.89251
0.47018	0.9567		0.74738	0.93362		0.74999	0.89658
0.47018	0.95636		0.74337	0.93888		0.74424	0.89134
0.46327	0.95466		0.74159	0.93885		0.74343	0.89062
0.4581	0.95311		0.74092	0.93191		0.74343	0.89595
0.45662	0.9536		0.74092	0.93068		0.73895	0.89708
0.45112	0.95325		0.73613	0.93145		0.73718	0.89335
0.44994	0.9511		0.7343	0.9275		0.73693	0.89746
0.44411	0.94945		0.73411	0.92371		0.73693	0.90032
0.44319	0.94804		0.73411	0.92759		0.73201	0.8974
0.43706	0.94899		0.72909	0.9375		0.73036	0.89331
0.43627	0.95306		0.7276	0.94603		0.73036	0.89104
0.43005	0.95587		0.7276	0.94737		0.73035	0.8909
0.4296	0.95396		0.7276	0.9476		0.72506	0.89064
0.42305	0.95265		0.72233	0.95039		0.72384	0.88792
0.42297	0.95024		0.72145	0.94469		0.72384	0.89133
0.41612	0.94581		0.72144	0.93694		0.72384	0.89393
0.41612	0.94554		0.71728	0.94194		0.71796	0.89297
0.4095	0.94583		0.71559	0.95307		0.71707	0.89423
0.4095	0.94274		0.71515	0.95788		0.71707	0.89429
0.40286	0.94308		0.71515	0.95594		0.71284	0.889
0.40286	0.94574		0.71029	0.95097		0.71115	0.88862
0.39633	0.9447		0.70861	0.94544		0.71077	0.89624
0.39633	0.942		0.7086	0.93953		0.71076	0.90742
0.3895	0.93954		0.70861	0.93205		0.70566	0.90671
0.38949	0.9374		0.70314	0.92777		0.70382	0.90132
0.3828	0.93509		0.7018	0.92581		0.70377	0.90463
0.37741	0.9334		0.7018	0.93026		0.70377	0.91416
0.37603	0.93611		0.7018	0.94005		0.69854	0.91254
0.37038	0.93893		0.69613	0.94381		0.69715	0.90024
0.36942	0.93896		0.6953	0.93491		0.69715	0.88828
0.3634	0.9353		0.6953	0.92404		0.69715	0.88235
0.36287	0.92987		0.69076	0.91964		0.69178	0.8841
0.35644	0.92862		0.68896	0.91912		0.6908	0.88576
0.35626	0.92795		0.6884	0.91639		0.69081	0.88154
0.34954	0.92878		0.68841	0.92371		0.68658	0.87854
0.34954	0.93271		0.68369	0.9358		0.68484	0.88339
0.34283	0.93367		0.68194	0.94632		0.68427	0.8931
0.34283	0.93237		0.68174	0.94745		0.68427	0.8958
0.33625	0.93045		0.68174	0.94391		0.67946	0.89074
0.33625	0.93037		0.6768	0.93949		0.67766	0.88664
0.32969	0.93091		0.67524	0.93992		0.67757	0.89027
0.32969	0.92853		0.67524	0.93892		0.67757	0.89797
0.32298	0.9256		0.67524	0.93209		0.67229	0.89484
0.31783	0.92488		0.6698	0.92557		0.67083	0.88589
0.31632	0.92295		0.66857	0.92462		0.67083	0.88341
0.31083	0.9215		0.66857	0.92972		0.67083	0.88802
0.30964	0.9214		0.66857	0.93676		0.66536	0.89188
0.30383	0.92202		0.66293	0.93985		0.6644	0.89077
0.30301	0.92163		0.66217	0.93956		0.6644	0.8919
0.29678	0.92003		0.66218	0.93792		0.6601	0.89164
0.29632	0.91951		0.65773	0.93146		0.65835	0.88928
0.28973	0.91718		0.65599	0.92846		0.65783	0.89356
0.28972	0.91433		0.65558	0.9288		0.65782	0.89381
0.28294	0.91453		0.65558	0.92612		0.65294	0.88882
0.28294	0.91446		0.6507	0.92774		0.65113	0.88663
0.27595	0.91349		0.6491	0.93083		0.65099	0.88505
0.27595	0.91209		0.6491	0.92957		0.65099	0.88529
0.26923	0.9111		0.6491	0.92621		0.64611	0.89826
0.26923	0.91008		0.6436	0.92533		0.64459	0.90258
0.26268	0.91014		0.64249	0.92905		0.6446	0.90181
0.26268	0.9094		0.6425	0.93336		0.6446	0.90129
0.25614	0.90754		0.63829	0.93317		0.63917	0.89999
0.25118	0.90656		0.63653	0.93438		0.63795	0.89861
0.24961	0.9049		0.63593	0.93695		0.63795	0.8986
0.24417	0.90341		0.63593	0.94355		0.63795	0.89579
0.24296	0.90126		0.63108	0.942		0.63187	0.89195
0.23711	0.90009		0.62926	0.92741		0.63105	0.89389
0.23613	0.89772		0.62907	0.92277		0.63105	0.90206
0.23007	0.89402		0.62907	0.92765		0.62658	0.90675
0.2295	0.89261		0.62414	0.93784		0.62483	0.90551
0.22305	0.8927		0.6228	0.9439		0.62432	0.8988
0.22274	0.89179		0.6228	0.94327		0.62432	0.89225
0.21602	0.89043		0.6228	0.93751		0.61959	0.89644
0.21602	0.88873		0.61725	0.9299		0.61785	0.90826
0.20932	0.88726		0.61627	0.92836		0.61771	0.91352
0.20933	0.8863		0.61627	0.93574		0.61771	0.90288
0.20251	0.88387		0.61181	0.93502		0.61255	0.8951
0.20251	0.88132		0.60998	0.93354		0.61108	0.8921
0.19581	0.88135		0.60935	0.93855		0.61108	0.89639
0.19581	0.88143		0.60935	0.94868		0.61108	0.90116
0.18894	0.87813		0.60482	0.94995		0.60583	0.89555
0.18894	0.87403		0.60312	0.94498		0.60478	0.8833
0.18226	0.87045		0.60303	0.94098		0.60479	0.87827
0.18226	0.86861		0.60303	0.94074		0.60034	0.88141
0.1756	0.86789		0.59797	0.93718		0.59847	0.88814
0.17025	0.8673		0.59664	0.93048		0.59787	0.89325
0.16882	0.86453		0.59664	0.93009		0.59787	0.89854
0.16323	0.86048		0.59664	0.93134		0.59315	0.9021
0.16195	0.85659		0.59065	0.92943		0.59143	0.90321
0.15625	0.8534		0.58958	0.92563		0.59143	0.90381
0.1553	0.8517		0.58958	0.92457		0.59143	0.90344
0.1492	0.84903		0.58525	0.92674		0.58631	0.89738
0.14852	0.84402		0.58346	0.92953		0.5851	0.89382
0.14219	0.84132		0.58278	0.93053		0.5851	0.89745
0.14175	0.83955		0.58278	0.93024		0.5851	0.89535
0.13518	0.8365		0.57839	0.93246		0.57936	0.89234
0.13517	0.83172		0.57671	0.93468		0.57856	0.88787
0.12855	0.82652		0.57665	0.93397		0.57856	0.88561
0.12855	0.8204		0.57665	0.93134		0.57412	0.88962
0.1217	0.81604		0.57119	0.9303		0.57237	0.89274
0.1217	0.81356		0.56984	0.9328		0.57202	0.89189
0.1146	0.80898		0.56984	0.94097		0.57202	0.89826
0.1146	0.8044		0.56984	0.94378		0.56695	0.91012
0.10768	0.79918		0.56439	0.94345		0.56523	0.91011
0.10768	0.79238		0.56362	0.94563		0.56523	0.89904
0.10076	0.78638		0.56362	0.94516		0.56522	0.89172
0.10076	0.78242		0.55913	0.94214		0.55987	0.89702
0.09395	0.77643		0.55736	0.94086		0.55859	0.90134
0.09395	0.76731		0.55712	0.9424		0.55859	0.90041
0.08728	0.75867		0.55712	0.94218		0.55859	0.8991
0.08219	0.75098		0.55191	0.93645		0.55284	0.89991
0.08069	0.74125		0.55032	0.9339		0.55192	0.90192
0.07515	0.73098		0.55032	0.93781		0.55192	0.9027
0.07404	0.72153		0.55032	0.93993		0.54743	0.90516
0.06811	0.71031		0.54484	0.9357		0.54561	0.90255
0.06728	0.69848		0.5437	0.93494		0.54506	0.89523
0.06111	0.6876		0.5437	0.93538		0.54506	0.89472
0.06067	0.67554		0.5437	0.93412		0.54059	0.90182
0.0541	0.66194		0.53791	0.93684		0.53894	0.90589
0.05399	0.64617		0.5371	0.9386		0.53878	0.89546
0.04703	0.62891		0.5371	0.93639		0.53878	0.88291
0.04702	0.61098		0.53268	0.93133		0.53344	0.88307
0.04	0.59096		0.53093	0.92974		0.53169	0.88986
0.04	0.56997		0.5306	0.93191		0.53169	0.89276
0.03361	0.5467		0.5306	0.93248		0.53169	0.89046
0.03361	0.52092		0.5257	0.93046		0.52656	0.88556
0.02689	0.49297		0.52414	0.9317		0.52556	0.88648
0.02689	0.46237		0.52414	0.92701		0.52556	0.89175
0.02036	0.42702		0.52414	0.92657		0.52108	0.89192
0.02036	0.38632		0.51852	0.93121		0.51922	0.89683
0.01391	0.34082		0.51725	0.93106		0.5187	0.90534
0.01391	0.29019		0.51725	0.92799		0.5187	0.90203
0.00742	0.2329		0.51725	0.92342		0.51399	0.8969
-0.00249	0.13096		0.51161	0.9282		0.51233	0.89289
-0.00484	-0.000833841		0.51079	0.93468		0.51233	0.88644
-0.00831	-0.09239		0.51079	0.9392		0.51233	0.8889
-0.00887	-0.14186		0.5062	0.94023		0.50691	0.8979
-0.01347	-0.18676		0.50438	0.93382		0.50561	0.90284
-0.01406	-0.23412		0.50391	0.9257		0.50561	0.898
-0.01961	-0.28549		0.50391	0.91939		0.50561	0.89899
-0.02018	-0.33767		0.49901	0.92095		0.50017	0.90095
-0.02625	-0.38323		0.49736	0.92623		0.49938	0.90061
-0.02654	-0.42038		0.49737	0.93056		0.49939	0.902
-0.03311	-0.45427		0.49737	0.93003		0.49464	0.90397
-0.03322	-0.48502		0.49209	0.92775		0.49277	0.90258
-0.03979	-0.51235		0.491	0.92384		0.49241	0.90094
-0.03979	-0.53771		0.491	0.92285		0.49241	0.89913
-0.04662	-0.5623		0.48675	0.92582		0.48777	0.89601
-0.04662	-0.58539		0.48495	0.93412		0.48614	0.89382
-0.05376	-0.60617		0.48434	0.94119		0.48614	0.89291
-0.05376	-0.62595		0.48434	0.93984		0.48614	0.89297
-0.06055	-0.64375		0.4797	0.93734		0.48049	0.89363
-0.06055	-0.66077		0.47796	0.93735		0.47905	0.89391
-0.06754	-0.67752		0.47788	0.93538		0.47905	0.89247
-0.06754	-0.69129		0.47788	0.93215		0.47905	0.89166
-0.07429	-0.70309		0.47262	0.92746		0.4735	0.89115
-0.07967	-0.71402		0.47119	0.92347		0.47254	0.89003
-0.08091	-0.72422		0.47119	0.92396		0.47254	0.89367
-0.08668	-0.7332		0.47119	0.92492		0.4683	0.89616
-0.08768	-0.74146		0.46552	0.92613		0.46657	0.89436
-0.09371	-0.74991		0.46456	0.92838		0.46607	0.88791
-0.09443	-0.75708		0.46456	0.9365		0.46607	0.88216
-0.1008	-0.7654		0.46038	0.93674		0.46131	0.88314
-0.10126	-0.77344		0.45868	0.93148		0.45956	0.88626
-0.10776	-0.78006		0.45819	0.93395		0.4595	0.88461
-0.10781	-0.78788		0.45818	0.93761		0.4595	0.88235
-0.1146	-0.79427		0.45348	0.93626		0.45431	0.88758
-0.1146	-0.79849		0.45175	0.93273		0.45298	0.89079
-0.12121	-0.80451		0.45161	0.93314		0.45298	0.88344
-0.12121	-0.81145		0.45161	0.93238		0.45298	0.88212
-0.12801	-0.81733		0.44626	0.93141		0.44702	0.88191
-0.12801	-0.82241		0.44479	0.92943		0.44612	0.87328
-0.13457	-0.82573		0.44479	0.92332		0.44612	0.8711
-0.13457	-0.8307		0.44479	0.91736		0.44171	0.88357
-0.14122	-0.83496		0.43916	0.91683		0.43995	0.89607
-0.14122	-0.83804		0.43814	0.91817		0.43968	0.90069
-0.1479	-0.8427		0.43814	0.92392		0.43968	0.89654
-0.15322	-0.84765		0.43399	0.92663		0.43473	0.88891
-0.15442	-0.85037		0.43227	0.92823		0.43321	0.88575
-0.1602	-0.85302		0.43172	0.92988		0.43321	0.88854
-0.16093	-0.85638		0.43172	0.92983		0.43321	0.89037
-0.16714	-0.86057		0.42689	0.93103		0.42785	0.89185
-0.16755	-0.86561		0.42509	0.93235		0.42679	0.88838
-0.17399	-0.86917		0.42484	0.92986		0.42679	0.87551
-0.17399	-0.87223		0.42484	0.92461		0.42259	0.87232
-0.18051	-0.87282		0.4199	0.91882		0.42082	0.8803
-0.1805	-0.87321		0.41832	0.91723		0.42024	0.88656
-0.18716	-0.8757		0.41833	0.91819		0.42024	0.889
-0.18716	-0.8788		0.41832	0.92236		0.41541	0.8877
-0.19371	-0.88051		0.41275	0.92933		0.41361	0.88509
-0.19371	-0.88284		0.41169	0.93214		0.41345	0.88617
-0.20034	-0.88357		0.41169	0.93369		0.41345	0.88796
-0.20034	-0.88407		0.40748	0.93736		0.40848	0.89075
-0.20693	-0.88574		0.40573	0.94002		0.40709	0.89187
-0.2123	-0.88811		0.40505	0.93515		0.40709	0.88886
-0.21358	-0.89076		0.40505	0.93214		0.40709	0.88475
-0.21926	-0.89066		0.40038	0.9323		0.40146	0.88534
-0.22027	-0.8913		0.3986	0.93086		0.40044	0.88302
-0.22622	-0.89341		0.39849	0.93091		0.40044	0.87467
-0.22692	-0.89679		0.39849	0.93667		0.39607	0.86964
-0.23315	-0.89922		0.39336	0.93931		0.39426	0.87072
-0.23367	-0.90101		0.39192	0.93916		0.39368	0.87545
-0.24011	-0.90252		0.39191	0.9335		0.39367	0.87945
-0.24032	-0.90362		0.39191	0.92986		0.38921	0.88256
-0.24694	-0.90483		0.38647	0.9341		0.38754	0.88665
-0.24694	-0.90719		0.38541	0.93824		0.38728	0.88423
-0.25381	-0.90951		0.38541	0.93395		0.38728	0.88298
-0.25381	-0.9115		0.38132	0.92994		0.38196	0.88798
-0.26048	-0.91169		0.37961	0.93215		0.38023	0.88564
-0.26048	-0.91127		0.37889	0.93218		0.38023	0.88395
-0.26711	-0.9128		0.37889	0.93445		0.38023	0.88588
-0.26711	-0.9147		0.37412	0.9375		0.3749	0.89056
-0.2738	-0.91578		0.37228	0.93868		0.37369	0.89281
-0.2738	-0.91684		0.3719	0.94017		0.37369	0.89394
-0.28035	-0.91821		0.3719	0.93681		0.37369	0.89126
-0.28035	-0.9182		0.3671	0.93058		0.36778	0.8891
-0.28674	-0.91918		0.36546	0.93228		0.36698	0.89095
-0.29207	-0.92126		0.36546	0.93549		0.36698	0.89111
-0.2932	-0.92189		0.36546	0.93461		0.36276	0.89187
-0.29903	-0.92177		0.35997	0.93176		0.36111	0.8923
-0.2999	-0.92227		0.3587	0.92811		0.36094	0.89226
-0.30596	-0.92289		0.3587	0.9253		0.36094	0.8854
-0.30642	-0.92406		0.35482	0.9269		0.35561	0.88204
-0.31291	-0.9249		0.35313	0.93067		0.35421	0.88461
-0.3132	-0.92575		0.3524	0.93427		0.35421	0.87919
-0.31986	-0.92708		0.3524	0.93054		0.35421	0.86599
-0.32002	-0.92876		0.3477	0.92239		0.34869	0.86632
-0.32652	-0.92926		0.34588	0.91823		0.34786	0.86903
-0.32652	-0.92941		0.34549	0.91428		0.34786	0.87007
-0.33323	-0.92963		0.34549	0.90983		0.34338	0.8688
-0.33322	-0.92943		0.3407	0.90807		0.34159	0.87031
-0.33975	-0.92912		0.33912	0.9094		0.34118	0.87457
-0.33975	-0.9299		0.33912	0.91037		0.34118	0.88008
-0.34645	-0.93053		0.33912	0.91214		0.33622	0.87986
-0.34645	-0.93234		0.33381	0.91869		0.33444	0.87603
-0.35314	-0.93326		0.33271	0.92195		0.3344	0.87199
-0.35314	-0.93469		0.33271	0.92057		0.3344	0.87114
-0.35977	-0.93668		0.3284	0.91807		0.3292	0.87278
-0.36483	-0.93621		0.32657	0.91872		0.32777	0.87361
-0.36624	-0.93618		0.32582	0.92512		0.32777	0.87476
-0.37175	-0.9357		0.32582	0.93114		0.32777	0.87363
-0.37296	-0.93723		0.32128	0.9268		0.32213	0.87547
-0.37868	-0.93866		0.31953	0.92266		0.32113	0.87342
-0.37947	-0.9376		0.31922	0.91831		0.32113	0.86721
-0.3856	-0.93812		0.31922	0.91455		0.31683	0.86513
-0.3863	-0.93939		0.3142	0.91555		0.31507	0.86999
-0.39257	-0.93955		0.31243	0.91109		0.31437	0.87404
-0.39287	-0.93932		0.31235	0.90636		0.31436	0.87402
-0.3995	-0.94259		0.31235	0.90654		0.31003	0.87119
-0.3995	-0.94594		0.30719	0.90733		0.30836	0.86691
-0.40611	-0.94667		0.30575	0.91068		0.30801	0.86601
-0.40611	-0.94713		0.30575	0.91257		0.30801	0.86847
-0.41266	-0.94649		0.30576	0.91653		0.30305	0.87643
-0.41266	-0.94425		0.30025	0.91972		0.30137	0.87868
-0.4193	-0.94422		0.29922	0.91968		0.30137	0.87619
-0.4193	-0.94504		0.29922	0.91736		0.30137	0.87068
-0.4259	-0.94649		0.29496	0.91494		0.29592	0.86892
-0.4259	-0.94864		0.29319	0.91269		0.29455	0.8712
-0.43236	-0.94918		0.29258	0.91335		0.29455	0.87492
-0.43765	-0.94859		0.29258	0.91725		0.29455	0.87269
-0.43896	-0.94863		0.28781	0.91715		0.28897	0.86938
-0.4446	-0.95013		0.28601	0.91489		0.28813	0.87608
-0.44575	-0.9507		0.28576	0.91165		0.28813	0.87345
-0.4515	-0.9513		0.28576	0.90741		0.28369	0.86853
-0.4523	-0.95203		0.28072	0.90825		0.28193	0.86556
-0.45849	-0.9524		0.27922	0.9124		0.28162	0.86271
-0.45913	-0.95433		0.27922	0.91345		0.28162	0.85833
-0.46547	-0.95419		0.27922	0.91083		0.27639	0.85898
-0.46573	-0.95436		0.27393	0.90427		0.27478	0.8612
-0.47225	-0.95315		0.2729	0.90186		0.27478	0.86647
-0.47226	-0.95178		0.2729	0.90956		0.27478	0.87309
-0.47904	-0.95424		0.26862	0.9118		0.26944	0.87827
-0.47904	-0.95541		0.26683	0.90815		0.26847	0.88172
-0.48568	-0.95615		0.26621	0.90424		0.26847	0.87788
-0.48568	-0.95559		0.26621	0.90347		0.2642	0.86986
-0.49256	-0.95486		0.2615	0.9033		0.26245	0.86524
-0.49256	-0.95492		0.25973	0.90436		0.26184	0.86643
-0.49907	-0.95591		0.2596	0.90703		0.26184	0.87264
-0.49907	-0.95683		0.2596	0.90628		0.25719	0.87584
-0.50565	-0.95565		0.25453	0.9021		0.25544	0.87361
-0.51078	-0.95515		0.25317	0.90115		0.25533	0.86949
-0.51221	-0.95633		0.25317	0.89915		0.25533	0.86813
-0.51777	-0.95732		0.25317	0.89615		0.25023	0.86963
-0.51897	-0.95811		0.24748	0.89548		0.24868	0.86884
-0.52477	-0.95991		0.24653	0.89559		0.24868	0.86497
-0.52563	-0.96106		0.24653	0.89439		0.24868	0.85988
-0.5317	-0.95938		0.24217	0.89546		0.24325	0.85974
-0.53235	-0.9577		0.2404	0.8961		0.24211	0.86013
-0.53873	-0.96005		0.23997	0.89471		0.24211	0.8593
-0.53936	-0.96032		0.23997	0.89523		0.23774	0.85591
-0.54569	-0.96056		0.23511	0.89761		0.23588	0.8514
-0.54624	-0.96148		0.23347	0.89854		0.23517	0.85309
-0.55266	-0.96103		0.23347	0.89669		0.23517	0.85423
-0.55291	-0.95991		0.23347	0.89584		0.23067	0.85566
-0.55964	-0.96086		0.22799	0.89664		0.22895	0.85635
-0.55964	-0.96154		0.22687	0.89493		0.22874	0.85201
-0.56622	-0.9615		0.22687	0.89038		0.22874	0.85282
-0.56623	-0.9608		0.22278	0.88619		0.22358	0.85484
-0.57304	-0.95963		0.22105	0.8866		0.22193	0.85222
-0.57304	-0.95918		0.22034	0.88644		0.22193	0.85075
-0.57991	-0.96059		0.22034	0.88872		0.22193	0.8545
-0.57991	-0.96302		0.21567	0.88853		0.21645	0.8568
-0.58657	-0.96463		0.21387	0.88394		0.21525	0.85812
-0.58657	-0.96555		0.21357	0.88327		0.21525	0.85549
-0.59334	-0.96449		0.21357	0.88507		0.21132	0.84806
-0.59334	-0.96335		0.20866	0.88226		0.20964	0.84242
-0.60007	-0.96364		0.20707	0.87939		0.20899	0.84454
-0.60542	-0.96525		0.20707	0.87627		0.20899	0.84835
-0.60669	-0.9672		0.20707	0.87737		0.20431	0.85131
-0.6125	-0.97026		0.20153	0.88234		0.20252	0.84856
-0.61337	-0.97069		0.20034	0.88337		0.20231	0.84796
-0.61949	-0.96768		0.20034	0.88044		0.20231	0.84903
-0.61997	-0.96539		0.20034	0.87816		0.19719	0.84895
-0.62655	-0.9665		0.1943	0.87704		0.1956	0.85209
-0.62659	-0.96851		0.19346	0.87855		0.1956	0.85194
-0.63328	-0.96947		0.19346	0.88014		0.1956	0.84895
-0.63328	-0.96994		0.18898	0.88111		0.19018	0.84801
-0.64006	-0.96855		0.18721	0.88224		0.18908	0.85097
-0.64006	-0.96829		0.18675	0.88018		0.18908	0.8509
-0.64669	-0.9703		0.18675	0.87193		0.18493	0.84638
-0.64669	-0.97068		0.18201	0.86683		0.18318	0.8385
-0.65352	-0.97051		0.18033	0.86473		0.18244	0.83334
-0.65352	-0.97153		0.18033	0.86479		0.18244	0.8376
-0.66035	-0.97153		0.18033	0.86516		0.17779	0.84414
-0.66035	-0.97222		0.17496	0.86205		0.17599	0.8498
-0.66704	-0.97398		0.17369	0.86121		0.17558	0.85185
-0.67235	-0.97214		0.17369	0.86607		0.17558	0.84677
-0.67365	-0.97085		0.16976	0.87016		0.17067	0.84103
-0.67943	-0.97189		0.16804	0.87253		0.16901	0.83603
-0.68036	-0.97283		0.16741	0.86817		0.16901	0.83062
-0.6865	-0.97544		0.16741	0.86133		0.16901	0.82949
-0.68722	-0.9771		0.16275	0.85808		0.16364	0.83517
-0.69359	-0.97653		0.16098	0.85694		0.16238	0.83619
-0.69385	-0.97681		0.16086	0.85599		0.16238	0.83243
-0.70053	-0.97686		0.16086	0.85806		0.16238	0.82725
-0.70053	-0.97549		0.15591	0.86235		0.15651	0.82711
-0.70711	-0.97284		0.15447	0.86126		0.15572	0.83084
-0.70711	-0.97056		0.15447	0.85666		0.15572	0.83332
-0.71396	-0.97043		0.15447	0.84848		0.15142	0.83108
-0.71396	-0.97146		0.14858	0.84484		0.14974	0.82966
-0.72074	-0.97412		0.14744	0.84712		0.14936	0.83114
-0.72073	-0.97602		0.14744	0.8472		0.14936	0.82987
-0.72751	-0.97388		0.14342	0.84564		0.14449	0.82623
-0.7275	-0.97171		0.14173	0.84604		0.14273	0.82252
-0.73409	-0.97472		0.14106	0.84871		0.14265	0.81829
-0.73409	-0.97818		0.14106	0.8497		0.14265	0.81777
-0.74112	-0.97658		0.13647	0.84617		0.13716	0.8177
-0.74649	-0.97539		0.13471	0.84056		0.13565	0.81602
-0.74789	-0.97749		0.13442	0.83326		0.13565	0.81113
-0.75351	-0.98016		0.13442	0.82843		0.13565	0.80842
-0.75477	-0.9796		0.12929	0.83054		0.13016	0.80633
-0.76061	-0.98027		0.12756	0.83235		0.1293	0.80477
-0.76156	-0.98071		0.12756	0.83234		0.1293	0.80845
-0.76769	-0.97794		0.12756	0.82732		0.12481	0.81153
-0.76842	-0.97798		0.12212	0.82172		0.12301	0.80898
-0.77478	-0.97984		0.12079	0.81547		0.12248	0.79961
-0.77524	-0.97805		0.12079	0.80819		0.12248	0.79818
-0.78183	-0.97865		0.12079	0.80424		0.11761	0.80377
-0.78198	-0.97979		0.11528	0.80458		0.11581	0.80416
-0.78869	-0.98219		0.11443	0.80487		0.11579	0.79853
-0.78869	-0.98356		0.11443	0.80335		0.11579	0.79479
-0.7953	-0.9827		0.10978	0.80272		0.11082	0.79343
-0.79529	-0.98018		0.10792	0.80095		0.10954	0.78986
-0.80191	-0.97942		0.1074	0.79806		0.10954	0.78252
-0.80191	-0.97982		0.1074	0.79795		0.10954	0.77868
-0.80851	-0.98004		0.1028	0.79292		0.10355	0.78218
-0.80851	-0.98198		0.10119	0.78758		0.10262	0.78649
-0.81517	-0.98168		0.10119	0.78557		0.10262	0.78586
-0.82054	-0.97873		0.10119	0.7844		0.09815	0.77821
-0.822	-0.97846		0.0956	0.78196		0.09636	0.77243
-0.82757	-0.97866		0.09463	0.77876		0.09585	0.76894
-0.82871	-0.97881		0.09463	0.77641		0.09585	0.76882
-0.83462	-0.9785		0.09019	0.77162		0.09125	0.7701
-0.83553	-0.97992		0.08839	0.76634		0.08956	0.76628
-0.84163	-0.98153		0.08794	0.7621		0.08949	0.75662
-0.84221	-0.98211		0.08794	0.75485		0.08949	0.74991
-0.84867	-0.98099		0.0831	0.74874		0.08432	0.74693
-0.84883	-0.9805		0.08134	0.74621		0.08291	0.74015
-0.85538	-0.9813		0.08123	0.74452		0.08291	0.73286
-0.85537	-0.98194		0.08123	0.74211		0.08291	0.72675
-0.862	-0.98205		0.07632	0.73461		0.07718	0.72053
-0.862	-0.98136		0.07495	0.72868		0.07615	0.71765
-0.86851	-0.98149		0.07495	0.72755		0.07615	0.71877
-0.86851	-0.98472		0.07495	0.72532		0.07189	0.71871
-0.8753	-0.98592		0.0693	0.72053		0.07013	0.71261
-0.8753	-0.98469		0.06836	0.7134		0.06962	0.7045
-0.88185	-0.98302		0.06836	0.70574		0.06962	0.70293
-0.88706	-0.9834		0.06385	0.69975		0.06493	0.70454
-0.88841	-0.98483		0.06202	0.69372		0.0632	0.70122
-0.89402	-0.98322		0.06148	0.6859		0.06306	0.69444
-0.89511	-0.98205		0.06148	0.67986		0.06306	0.68955
-0.90091	-0.98225		0.05694	0.67338		0.05771	0.68317
-0.9017	-0.98203		0.05526	0.66474		0.05622	0.6753
-0.90782	-0.98308		0.05521	0.65394		0.05622	0.66887
-0.90834	-0.98532		0.05521	0.6423		0.05622	0.66005
-0.9146	-0.98419		0.05	0.6347		0.05088	0.65148
-0.9146	-0.98256		0.04862	0.62833		0.04993	0.64393
-0.92123	-0.98505		0.04862	0.61998		0.04993	0.63769
-0.92123	-0.9852		0.04862	0.60912		0.0455	0.62846
-0.92778	-0.98303		0.04269	0.59596		0.04368	0.61621
-0.92778	-0.98206		0.04166	0.58356		0.0431	0.60637
-0.93435	-0.98241		0.04166	0.57254		0.0431	0.59633
-0.93435	-0.98434		0.03741	0.5602		0.03827	0.58616
-0.94107	-0.98409		0.03568	0.54626		0.03647	0.57613
-0.94107	-0.98505		0.0351	0.53242		0.03627	0.56536
-0.9477	-0.98724		0.0351	0.52119		0.03627	0.5529
-0.9477	-0.98768		0.03056	0.50917		0.0314	0.53998
-0.95418	-0.98726		0.02886	0.49355		0.02995	0.52637
-0.95922	-0.98853		0.02861	0.47604		0.02995	0.51166
-0.96053	-0.98946		0.02861	0.45823		0.02995	0.49565
-0.96598	-0.9863		0.02356	0.44237		0.02468	0.47902
-0.96717	-0.98464		0.02201	0.42664		0.02367	0.46005
-0.97272	-0.98317		0.02201	0.40918		0.02367	0.43919
-0.97372	-0.98463		0.02201	0.38997		0.01948	0.42148
-0.97947	-0.98769		0.01667	0.37		0.01773	0.40424
-0.98018	-0.98819		0.01566	0.34895		0.01709	0.38452
-0.98612	-0.98903		0.01566	0.32606		0.01709	0.36188
-0.98671	-0.99004		0.01161	0.30152		0.01252	0.33691
-0.99274	-0.98943		0.00993	0.27409		0.01078	0.31061
-0.99325	-0.98779		0.00923	0.24785		0.01063	0.28387
-1.00074	-0.98845		0.00923	0.222		0.01063	0.25505
-1.00113	-0.98995		0.00154	0.19217		0.00558	0.22394
-1.00277	-0.99159		-0.00144	0.15616		0.0041	0.19062
-1.00277	-0.99118		-0.00207	0.09003		0.0041	0.13773
-1.00223	-0.98963		-0.00207	0.00857		0.0041	0.05361
-1.00223	-0.98986		-0.0059	-0.05789		-0.0049	-0.03146
-0.9981	-0.98855		-0.00727	-0.0972		-0.00659	-0.0912
-0.9981	-0.98726		-0.00727	-0.12108		-0.00659	-0.12216
-0.99212	-0.98735		-0.00727	-0.13962		-0.00902	-0.14537
-0.99212	-0.9876		-0.01085	-0.15873		-0.01003	-0.16837
-0.98554	-0.9856		-0.01176	-0.17981		-0.01042	-0.19207
-0.98555	-0.98356		-0.01176	-0.20342		-0.01042	-0.21507
-0.97895	-0.98491		-0.01176	-0.22791		-0.01447	-0.2397
-0.97894	-0.98633		-0.01671	-0.25269		-0.01603	-0.26535
-0.9724	-0.98462		-0.01755	-0.27982		-0.0161	-0.29184
-0.9724	-0.98326		-0.01755	-0.30575		-0.0161	-0.31836
-0.9659	-0.98387		-0.02172	-0.32751		-0.02065	-0.34288
-0.9659	-0.98401		-0.02342	-0.34589		-0.02185	-0.36637
-0.95916	-0.98515		-0.02393	-0.36531		-0.02185	-0.38879
-0.9539	-0.98871		-0.02393	-0.38507		-0.02185	-0.41116
-0.95246	-0.98737		-0.02829	-0.40422		-0.02763	-0.4318
-0.94705	-0.98421		-0.0299	-0.42435		-0.02862	-0.45164
-0.94615	-0.98277		-0.03003	-0.44478		-0.02862	-0.47262
-0.94016	-0.98489		-0.03003	-0.46224		-0.03269	-0.49124
-0.93964	-0.98597		-0.03528	-0.47775		-0.03436	-0.50838
-0.93326	-0.98595		-0.03683	-0.49804		-0.03492	-0.52478
-0.93311	-0.98715		-0.03683	-0.51756		-0.03492	-0.54145
-0.92646	-0.9881		-0.03683	-0.53395		-0.03966	-0.55935
-0.92646	-0.99		-0.04242	-0.54763		-0.04144	-0.57633
-0.91975	-0.98867		-0.04361	-0.55854		-0.04144	-0.59099
-0.91975	-0.98515		-0.04361	-0.56698		-0.04144	-0.60259
-0.91328	-0.98443		-0.04785	-0.57683		-0.04704	-0.60987
-0.91328	-0.98511		-0.04966	-0.59115		-0.04858	-0.61648
-0.90645	-0.98245		-0.05027	-0.60533		-0.04858	-0.62706
-0.90646	-0.97999		-0.05027	-0.6164		-0.04858	-0.6367
-0.89991	-0.98181		-0.05507	-0.62672		-0.05434	-0.64579
-0.89991	-0.98315		-0.05687	-0.64127		-0.05526	-0.65535
-0.89337	-0.98412		-0.05711	-0.65755		-0.05526	-0.66699
-0.88818	-0.98478		-0.05711	-0.66948		-0.05982	-0.67579
-0.88679	-0.9846		-0.06246	-0.676		-0.06165	-0.68363
-0.88119	-0.98462		-0.06406	-0.68308		-0.06207	-0.69128
-0.8803	-0.98345		-0.06406	-0.68892		-0.06207	-0.70113
-0.87421	-0.98253		-0.06406	-0.69461		-0.06682	-0.70841
-0.87365	-0.98273		-0.06979	-0.70381		-0.06853	-0.7114
-0.8672	-0.98175		-0.07089	-0.71112		-0.06854	-0.71319
-0.86696	-0.9808		-0.07089	-0.7094		-0.06854	-0.71933
-0.86033	-0.979		-0.0749	-0.71413		-0.07394	-0.72651
-0.86033	-0.97686		-0.07658	-0.72615		-0.0754	-0.73254
-0.85359	-0.9777		-0.07709	-0.73719		-0.0754	-0.738
-0.85359	-0.97706		-0.07709	-0.7437		-0.0754	-0.74265
-0.84688	-0.97562		-0.08206	-0.7498		-0.08121	-0.74425
-0.84688	-0.9769		-0.08386	-0.75314		-0.08225	-0.74777
-0.84014	-0.97925		-0.08386	-0.75512		-0.08225	-0.75257
-0.84014	-0.9791		-0.08386	-0.75794		-0.08638	-0.75753
-0.83344	-0.97837		-0.08918	-0.76168		-0.08808	-0.76396
-0.83344	-0.97987		-0.09058	-0.7662		-0.08865	-0.76412
-0.82668	-0.97861		-0.09058	-0.76919		-0.08865	-0.76688
-0.82668	-0.9745		-0.09058	-0.77447		-0.0933	-0.77168
-0.81974	-0.97302		-0.09616	-0.77728		-0.09505	-0.77573
-0.81443	-0.97571		-0.09716	-0.77943		-0.09524	-0.78145
-0.81298	-0.97853		-0.09716	-0.78165		-0.09524	-0.78345
-0.80744	-0.9786		-0.1015	-0.78655		-0.10037	-0.78685
-0.80637	-0.97947		-0.10329	-0.79418		-0.10185	-0.79095
-0.80041	-0.97831		-0.10369	-0.80138		-0.10185	-0.79353
-0.79964	-0.97627		-0.10369	-0.8051		-0.10185	-0.79398
-0.79339	-0.97756		-0.10832	-0.80643		-0.10745	-0.79468
-0.79287	-0.97945		-0.10996	-0.81146		-0.10835	-0.79706
-0.78637	-0.97872		-0.10996	-0.81882		-0.10835	-0.79645
-0.78612	-0.97593		-0.10996	-0.82357		-0.11281	-0.79356
-0.77926	-0.97507		-0.11533	-0.82489		-0.1146	-0.79986
-0.77909	-0.97626		-0.1166	-0.82842		-0.11511	-0.81183
-0.77217	-0.97729		-0.1166	-0.83366		-0.11511	-0.81602
-0.77202	-0.97951		-0.1166	-0.836		-0.11973	-0.81701
-0.76534	-0.9806		-0.12239	-0.83872		-0.12144	-0.82096
-0.76533	-0.97961		-0.12329	-0.83776		-0.1215	-0.82295
-0.7584	-0.97604		-0.12329	-0.8356		-0.1215	-0.82247
-0.7584	-0.97328		-0.12783	-0.83393		-0.12677	-0.8205
-0.75138	-0.97225		-0.12965	-0.83513		-0.12823	-0.82067
-0.75138	-0.97363		-0.13009	-0.84155		-0.12823	-0.8289
-0.74478	-0.97423		-0.1301	-0.85462		-0.12823	-0.83785
-0.74478	-0.97278		-0.13491	-0.85746		-0.13395	-0.84228
-0.73812	-0.97156		-0.13655	-0.85614		-0.13494	-0.84247
-0.73812	-0.97288		-0.13655	-0.85873		-0.13494	-0.83908
-0.73142	-0.97269		-0.13655	-0.85841		-0.13904	-0.837
-0.72622	-0.97216		-0.14164	-0.85272		-0.14071	-0.83291
-0.72497	-0.97047		-0.14277	-0.84836		-0.14136	-0.82803
-0.71911	-0.97039		-0.14277	-0.8491		-0.14136	-0.83222
-0.71822	-0.97151		-0.14682	-0.85254		-0.14604	-0.84253
-0.71207	-0.97099		-0.14856	-0.85681		-0.14783	-0.8509
-0.71158	-0.97186		-0.14903	-0.8606		-0.14819	-0.84984
-0.7051	-0.97132		-0.14903	-0.86302		-0.14819	-0.84539
-0.7051	-0.968		-0.15378	-0.86955		-0.15292	-0.84807
-0.69844	-0.96709		-0.15551	-0.87189		-0.15455	-0.84973
-0.69845	-0.96738		-0.15551	-0.87043		-0.15455	-0.84948
-0.69161	-0.96839		-0.15551	-0.86803		-0.15455	-0.85073
-0.69161	-0.96827		-0.16089	-0.86564		-0.16013	-0.85285
-0.685	-0.96699		-0.16207	-0.86447		-0.16146	-0.85486
-0.685	-0.96787		-0.16207	-0.86623		-0.16146	-0.85924
-0.67831	-0.96731		-0.16207	-0.87304		-0.16146	-0.85988
-0.67327	-0.96498		-0.16788	-0.8761		-0.16685	-0.8572
-0.67167	-0.9648		-0.16866	-0.87872		-0.16764	-0.85228
-0.66615	-0.96518		-0.16866	-0.88163		-0.16764	-0.85292
-0.66493	-0.96631		-0.17308	-0.88586		-0.17223	-0.85886
-0.6591	-0.96599		-0.17482	-0.88748		-0.17405	-0.85969
-0.65827	-0.96506		-0.17517	-0.88829		-0.17445	-0.85992
-0.65209	-0.96574		-0.17517	-0.89017		-0.17445	-0.85856
-0.65172	-0.96493		-0.18011	-0.88438		-0.17917	-0.85732
-0.64497	-0.96313		-0.18184	-0.88175		-0.18077	-0.85335
-0.64497	-0.96232		-0.18184	-0.88208		-0.18077	-0.84801
-0.63832	-0.96218		-0.18184	-0.88441		-0.18077	-0.84889
-0.63832	-0.96309		-0.18688	-0.89023		-0.18604	-0.85469
-0.63154	-0.96286		-0.18819	-0.89257		-0.18712	-0.85738
-0.63153	-0.96312		-0.18819	-0.89266		-0.18712	-0.85897
-0.6246	-0.96399		-0.18819	-0.89362		-0.19142	-0.8588
-0.6246	-0.96272		-0.19383	-0.89421		-0.19323	-0.86205
-0.61797	-0.96243		-0.19481	-0.89473		-0.19395	-0.86797
-0.61797	-0.96232		-0.19481	-0.89849		-0.19395	-0.87203
-0.61133	-0.96094		-0.19903	-0.90491		-0.19837	-0.86902
-0.61133	-0.96052		-0.20075	-0.90842		-0.20007	-0.86386
-0.60452	-0.95927		-0.20119	-0.90717		-0.20036	-0.86694
-0.59925	-0.95706		-0.20119	-0.90337		-0.20036	-0.87088
-0.59793	-0.95683		-0.20603	-0.90041		-0.20519	-0.86942
-0.5922	-0.95923		-0.20779	-0.90226		-0.20677	-0.8685
-0.5914	-0.96165		-0.20779	-0.90363		-0.20677	-0.86523
-0.58513	-0.95914		-0.20779	-0.90734		-0.20677	-0.86592
-0.5847	-0.95697		-0.2133	-0.9121		-0.21229	-0.87021
-0.57814	-0.96001		-0.21472	-0.91396		-0.21357	-0.86807
-0.5779	-0.96253		-0.21472	-0.91348		-0.21357	-0.8661
-0.5711	-0.96066		-0.21849	-0.91635		-0.21357	-0.87468
-0.5711	-0.95978		-0.22018	-0.91518		-0.21941	-0.88235
-0.56443	-0.95952		-0.22092	-0.91378		-0.22028	-0.88741
-0.56443	-0.9577		-0.22092	-0.91431		-0.22029	-0.89023
-0.55774	-0.95738		-0.22549	-0.91728		-0.22443	-0.88628
-0.55774	-0.95799		-0.22726	-0.9216		-0.22609	-0.88439
-0.55102	-0.95773		-0.22752	-0.92038		-0.22662	-0.88388
-0.55102	-0.9569		-0.22752	-0.91758		-0.22662	-0.88326
-0.54446	-0.95547		-0.23231	-0.91593		-0.23151	-0.88649
-0.54446	-0.95419		-0.23384	-0.91298		-0.23333	-0.89001
-0.5378	-0.95396		-0.23384	-0.91372		-0.2336	-0.88625
-0.53251	-0.95334		-0.23384	-0.91434		-0.2336	-0.88135
-0.5313	-0.95269		-0.2394	-0.91201		-0.23834	-0.88374
-0.52549	-0.95236		-0.2407	-0.90851		-0.23987	-0.89004
-0.52457	-0.95356		-0.2407	-0.9049		-0.23987	-0.88965
-0.51851	-0.95458		-0.2407	-0.90479		-0.23987	-0.88694
-0.51767	-0.95293		-0.24628	-0.91184		-0.24535	-0.88644
-0.51154	-0.95312		-0.24709	-0.91412		-0.24654	-0.88473
-0.51097	-0.95212		-0.24709	-0.9098		-0.24654	-0.88199
-0.50452	-0.94999		-0.25148	-0.91031		-0.24654	-0.88874
-0.5044	-0.94925		-0.25322	-0.913		-0.25255	-0.89688
-0.49787	-0.94929		-0.25368	-0.91221		-0.25341	-0.89566
-0.49787	-0.94821		-0.25368	-0.91565		-0.25341	-0.89256
-0.4913	-0.94906		-0.25839	-0.92107		-0.25757	-0.89157
-0.4913	-0.95167		-0.26011	-0.9241		-0.25923	-0.89297
-0.48458	-0.9491		-0.26014	-0.92348		-0.25955	-0.89335
-0.48458	-0.94559		-0.26014	-0.92284		-0.25955	-0.89516
-0.47805	-0.94528		-0.26543	-0.9228		-0.26457	-0.89574
-0.47805	-0.94585		-0.26681	-0.9237		-0.26612	-0.89342
-0.47131	-0.9455		-0.26681	-0.92881		-0.26612	-0.88544
-0.47131	-0.94505		-0.26681	-0.92832		-0.26612	-0.88424
-0.46441	-0.94793		-0.27225	-0.92356		-0.27152	-0.88969
-0.45903	-0.94828		-0.27318	-0.92208		-0.27249	-0.89307
-0.45757	-0.94568		-0.27318	-0.9243		-0.27249	-0.88948
-0.45209	-0.94447		-0.27757	-0.92003		-0.27655	-0.88548
-0.45103	-0.94386		-0.27937	-0.91627		-0.27822	-0.88538
-0.44506	-0.94356		-0.27988	-0.91981		-0.27878	-0.88631
-0.44425	-0.94244		-0.27988	-0.92039		-0.27878	-0.89029
-0.43812	-0.94258		-0.28445	-0.91394		-0.28363	-0.89744
-0.43743	-0.94324		-0.28614	-0.90843		-0.28546	-0.89931
-0.43117	-0.9448		-0.28618	-0.90997		-0.28559	-0.89108
-0.43073	-0.94304		-0.28618	-0.91405		-0.28559	-0.89095
-0.42418	-0.93894		-0.29139	-0.9204		-0.29066	-0.89402
-0.42418	-0.939		-0.29271	-0.92534		-0.29206	-0.89351
-0.41752	-0.94052		-0.29271	-0.92117		-0.29206	-0.88887
-0.41752	-0.93805		-0.29271	-0.92069		-0.29206	-0.8911
-0.41086	-0.93618		-0.29827	-0.92593		-0.29736	-0.9001
-0.41086	-0.93666		-0.29924	-0.92443		-0.2982	-0.90388
-0.40419	-0.93688		-0.29924	-0.92749		-0.2982	-0.90048
-0.40419	-0.93687		-0.3035	-0.93274		-0.30257	-0.90064
-0.3974	-0.93724		-0.30524	-0.93456		-0.30432	-0.89882
-0.39741	-0.93737		-0.30584	-0.93808		-0.30486	-0.88975
-0.39059	-0.93543		-0.30584	-0.93994		-0.30486	-0.88565
-0.39059	-0.93471		-0.31063	-0.94049		-0.30962	-0.88408
-0.38394	-0.93453		-0.31243	-0.93887		-0.31139	-0.88421
-0.37885	-0.93396		-0.3127	-0.93494		-0.31156	-0.88759
-0.37738	-0.93344		-0.3127	-0.93		-0.31156	-0.89128
-0.37189	-0.93342		-0.31768	-0.92972		-0.31654	-0.88973
-0.37074	-0.93314		-0.31925	-0.93468		-0.318	-0.89123
-0.36494	-0.93327		-0.31925	-0.9407		-0.318	-0.89524
-0.3642	-0.93397		-0.31925	-0.94609		-0.318	-0.89498
-0.358	-0.93237		-0.32434	-0.94674		-0.32341	-0.8901
-0.35759	-0.93072		-0.32546	-0.9416		-0.32452	-0.88985
-0.35105	-0.9307		-0.32546	-0.93845		-0.32452	-0.89008
-0.3509	-0.92836		-0.32546	-0.93769		-0.32867	-0.8878
-0.34419	-0.92644		-0.33124	-0.93963		-0.33043	-0.88762
-0.34419	-0.92578		-0.33205	-0.94391		-0.33105	-0.88795
-0.33742	-0.92623		-0.33205	-0.94546		-0.33105	-0.88776
-0.33742	-0.92741		-0.33656	-0.94102		-0.33567	-0.89369
-0.33078	-0.92627		-0.33834	-0.93706		-0.33741	-0.90284
-0.33079	-0.92368		-0.33861	-0.94004		-0.33763	-0.91045
-0.32405	-0.9224		-0.33861	-0.94568		-0.33763	-0.91148
-0.32405	-0.9225		-0.3437	-0.95204		-0.34284	-0.9059
-0.31751	-0.92186		-0.34531	-0.95606		-0.34434	-0.90847
-0.31751	-0.92155		-0.34532	-0.96017		-0.34434	-0.91484
-0.31078	-0.92092		-0.34531	-0.96143		-0.34434	-0.9138
-0.30577	-0.92162		-0.35063	-0.9575		-0.34962	-0.91012
-0.30419	-0.92052		-0.35179	-0.94824		-0.35055	-0.90289
-0.29886	-0.91696		-0.35179	-0.93802		-0.35055	-0.89651
-0.29752	-0.91498		-0.35179	-0.93835		-0.35481	-0.89665
-0.29189	-0.91365		-0.35758	-0.94116		-0.35656	-0.89893
-0.29081	-0.91333		-0.35856	-0.93261		-0.35709	-0.8988
-0.28488	-0.91376		-0.35856	-0.92712		-0.35709	-0.89483
-0.284	-0.9148		-0.36282	-0.92938		-0.36195	-0.89774
-0.27789	-0.91464		-0.36456	-0.93332		-0.36375	-0.90294
-0.27735	-0.91374		-0.3652	-0.93655		-0.36392	-0.90365
-0.2709	-0.91011		-0.3652	-0.93877		-0.36392	-0.90422
-0.27052	-0.908		-0.3698	-0.93473		-0.36879	-0.90542
-0.26399	-0.9082		-0.37155	-0.92754		-0.37021	-0.90338
-0.26376	-0.90656		-0.3717	-0.92498		-0.37021	-0.90577
-0.25732	-0.90641		-0.3717	-0.92365		-0.37021	-0.91354
-0.25732	-0.90537		-0.37647	-0.92651		-0.37561	-0.91537
-0.25062	-0.90395		-0.37774	-0.93517		-0.37656	-0.91342
-0.25062	-0.9012		-0.37774	-0.94609		-0.37656	-0.90918
-0.24396	-0.89885		-0.37774	-0.94923		-0.38083	-0.90332
-0.24396	-0.89798		-0.38369	-0.94917		-0.38258	-0.9034
-0.23747	-0.89913		-0.38473	-0.94856		-0.38314	-0.90956
-0.23747	-0.8989		-0.38473	-0.94667		-0.38314	-0.90995
-0.23065	-0.8979		-0.38898	-0.94143		-0.38793	-0.9093
-0.23065	-0.89525		-0.39072	-0.93683		-0.38971	-0.90725
-0.22376	-0.89144		-0.39122	-0.93221		-0.38996	-0.90184
-0.22376	-0.8894		-0.39122	-0.92846		-0.38996	-0.90313
-0.21681	-0.886		-0.3958	-0.93407		-0.39481	-0.90723
-0.21681	-0.88337		-0.39749	-0.93755		-0.39637	-0.90535
-0.20988	-0.88348		-0.39771	-0.93648		-0.39638	-0.9057
-0.2046	-0.88216		-0.39771	-0.93509		-0.39638	-0.90767
-0.2032	-0.88003		-0.40267	-0.93496		-0.4017	-0.90985
-0.19762	-0.87951		-0.40426	-0.93765		-0.403	-0.91136
-0.19679	-0.87946		-0.40426	-0.93711		-0.403	-0.90958
-0.19057	-0.87524		-0.40425	-0.92977		-0.403	-0.90311
-0.19	-0.87146		-0.40971	-0.92775		-0.40898	-0.89664
-0.18362	-0.86975		-0.41091	-0.93261		-0.40992	-0.89095
-0.18336	-0.86824		-0.41091	-0.93367		-0.40992	-0.88586
-0.17665	-0.86575		-0.41091	-0.93419		-0.41406	-0.88937
-0.17659	-0.86326		-0.41686	-0.93705		-0.41573	-0.89432
-0.16972	-0.86224		-0.41779	-0.93886		-0.41607	-0.89882
-0.16972	-0.85863		-0.41779	-0.93661		-0.41607	-0.90231
-0.16298	-0.85673		-0.42213	-0.93358		-0.42094	-0.90305
-0.16298	-0.85436		-0.42388	-0.93244		-0.42253	-0.90837
-0.15634	-0.8517		-0.42437	-0.94142		-0.42253	-0.91571
-0.15634	-0.84855		-0.42437	-0.95026		-0.42253	-0.91779
-0.14944	-0.84282		-0.42901	-0.95061		-0.42799	-0.91648
-0.14944	-0.83855		-0.4307	-0.94873		-0.42918	-0.91328
-0.14292	-0.83634		-0.4307	-0.94773		-0.42918	-0.91205
-0.14292	-0.83301		-0.4307	-0.94803		-0.42918	-0.91417
-0.13633	-0.82874		-0.43603	-0.94941		-0.435	-0.9158
-0.13633	-0.8253		-0.4374	-0.94781		-0.43585	-0.91361
-0.12931	-0.82057		-0.4374	-0.94069		-0.43585	-0.9126
-0.12413	-0.81438		-0.4374	-0.93483		-0.44039	-0.9117
-0.12265	-0.80949		-0.44304	-0.93718		-0.4422	-0.91214
-0.11713	-0.80484		-0.44398	-0.94223		-0.44264	-0.91382
-0.11589	-0.79831		-0.44398	-0.94212		-0.44264	-0.91591
-0.11008	-0.79401		-0.44825	-0.93562		-0.44738	-0.91732
-0.10896	-0.78974		-0.44999	-0.9334		-0.4491	-0.91564
-0.10302	-0.78435		-0.45043	-0.93602		-0.44926	-0.91081
-0.1022	-0.77737		-0.45043	-0.93856		-0.44926	-0.91332
-0.09596	-0.76967		-0.45524	-0.93811		-0.45445	-0.91803
-0.09552	-0.76211		-0.457	-0.9369		-0.45602	-0.91935
-0.08909	-0.75399		-0.45701	-0.94083		-0.45602	-0.92055
-0.08909	-0.747		-0.45701	-0.94438		-0.45602	-0.91736
-0.08232	-0.74037		-0.46204	-0.94381		-0.46127	-0.91016
-0.08232	-0.72967		-0.46341	-0.94302		-0.46243	-0.90316
-0.07556	-0.71947		-0.46341	-0.94401		-0.46243	-0.9034
-0.07556	-0.71177		-0.46341	-0.94474		-0.46243	-0.91416
-0.06887	-0.70265		-0.4691	-0.94186		-0.46831	-0.91592
-0.06887	-0.69125		-0.47013	-0.9415		-0.46922	-0.91451
-0.06212	-0.67743		-0.47013	-0.94652		-0.46922	-0.91672
-0.06212	-0.66241		-0.47432	-0.95179		-0.47367	-0.9198
-0.05523	-0.64643		-0.47605	-0.95133		-0.47546	-0.92161
-0.05523	-0.62931		-0.47664	-0.94831		-0.47599	-0.915
-0.04834	-0.61131		-0.47664	-0.94383		-0.47599	-0.91249
-0.04834	-0.59121		-0.48153	-0.93884		-0.48078	-0.91233
-0.04146	-0.56989		-0.48336	-0.93809		-0.48255	-0.91002
-0.03635	-0.54767		-0.48359	-0.94418		-0.48262	-0.9086
-0.03512	-0.52327		-0.48359	-0.94773		-0.48262	-0.90734
-0.02957	-0.49559		-0.48839	-0.94386		-0.48765	-0.90673
-0.02873	-0.46434		-0.48991	-0.93677		-0.48911	-0.90546
-0.0227	-0.42972		-0.48991	-0.9354		-0.48911	-0.90527
-0.02232	-0.39209		-0.48991	-0.93762		-0.48911	-0.90558
-0.01581	-0.3496		-0.49536	-0.93705		-0.49473	-0.90501
-0.01581	-0.30158		-0.49652	-0.93697		-0.49589	-0.90412
-0.00945	-0.24648		-0.49652	-0.94249		-0.49589	-0.90689
-0.00945	-0.16248		-0.49652	-0.94651		-0.49982	-0.9137
0.00303	-0.02621		-0.50247	-0.94794		-0.50149	-0.92002
0.00303	0.08609		-0.50325	-0.94565		-0.50215	-0.9214
0.00701	0.15849		-0.50325	-0.94472		-0.50215	-0.91802
0.00701	0.21213		-0.50785	-0.94544		-0.50672	-0.91014
0.01239	0.25967		-0.50965	-0.94795		-0.50847	-0.90598
0.01239	0.30505		-0.51002	-0.94863		-0.5087	-0.90991
0.01872	0.348		-0.51002	-0.94526		-0.5087	-0.91606
0.01872	0.38853		-0.5147	-0.94466		-0.51402	-0.91759
0.02507	0.42646		-0.51636	-0.94774		-0.51561	-0.91108
0.02507	0.46044		-0.51636	-0.95203		-0.51561	-0.90403
0.03153	0.4915		-0.51636	-0.9523		-0.51561	-0.90437
0.03153	0.51994		-0.52195	-0.95344		-0.52089	-0.91275
0.03837	0.54707		-0.52321	-0.95763		-0.52196	-0.91971
0.04401	0.57379		-0.52321	-0.95719		-0.52196	-0.91959
0.04541	0.59795		-0.52707	-0.95526		-0.52628	-0.91973
0.05135	0.61818		-0.52874	-0.95744		-0.52811	-0.91615
0.05256	0.63658		-0.52934	-0.96128		-0.52874	-0.91029
0.05858	0.65395		-0.52934	-0.95964		-0.52875	-0.90473
0.05965	0.66999		-0.534	-0.95312		-0.53313	-0.90179
0.06575	0.68465		-0.53576	-0.94799		-0.53478	-0.90144
0.06647	0.69881		-0.53576	-0.94677		-0.53506	-0.90551
0.07287	0.71188		-0.53576	-0.94613		-0.53506	-0.9102
0.07333	0.72358		-0.54104	-0.94542		-0.54023	-0.91018
0.07997	0.7355		-0.54218	-0.94478		-0.54199	-0.91058
0.08033	0.74698		-0.54218	-0.94508		-0.54198	-0.90853
0.08687	0.75624		-0.54618	-0.94363		-0.54198	-0.90109
0.08687	0.76319		-0.54788	-0.93849		-0.54725	-0.89348
0.09364	0.77071		-0.54846	-0.93733		-0.54855	-0.89433
0.09364	0.77876		-0.54846	-0.93721		-0.54855	-0.89952
0.10033	0.78637		-0.55342	-0.93257		-0.54855	-0.90023
0.10033	0.79355		-0.55529	-0.93152		-0.55435	-0.89896
0.10703	0.80008		-0.55559	-0.94195		-0.55535	-0.9019
0.10703	0.80622		-0.55559	-0.95245		-0.55535	-0.90977
0.11367	0.81223		-0.56047	-0.96077		-0.55952	-0.91434
0.11367	0.81837		-0.56208	-0.96579		-0.56122	-0.91397
0.12033	0.82326		-0.56208	-0.96709		-0.56176	-0.90986
0.12571	0.82744		-0.56208	-0.96624		-0.56176	-0.9042
0.12701	0.8319		-0.56766	-0.96384		-0.5667	-0.90643
0.13276	0.83667		-0.56892	-0.95636		-0.56842	-0.90843
0.13374	0.8406		-0.56892	-0.94772		-0.56842	-0.90707
0.13979	0.84435		-0.56892	-0.9466		-0.56842	-0.90619
0.14073	0.84872		-0.57469	-0.94629		-0.57363	-0.90387
0.14681	0.852		-0.57549	-0.94522		-0.5748	-0.90309
0.1474	0.8535		-0.57549	-0.94181		-0.5748	-0.90803
0.15375	0.85694		-0.58	-0.93995		-0.5748	-0.91053
0.15396	0.86064		-0.58177	-0.94479		-0.58058	-0.90468
0.16054	0.86313		-0.5822	-0.94446		-0.58139	-0.90339
0.16054	0.86614		-0.5822	-0.94195		-0.58139	-0.90889
0.16745	0.86856		-0.58702	-0.94397		-0.58596	-0.91307
0.16745	0.87294		-0.58876	-0.94405		-0.58777	-0.9092
0.17422	0.8774		-0.58876	-0.94618		-0.58815	-0.90265
0.17423	0.87858		-0.58876	-0.9462		-0.58815	-0.90435
0.18093	0.88051		-0.59412	-0.94369		-0.5931	-0.90761
0.18093	0.8831		-0.59542	-0.94596		-0.59488	-0.90497
0.18764	0.88429		-0.59542	-0.94597		-0.59495	-0.90265
0.18764	0.88426		-0.59542	-0.94137		-0.59495	-0.91111
0.1944	0.88603		-0.60115	-0.93488		-0.59997	-0.91538
0.19439	0.88961		-0.60211	-0.93326		-0.60133	-0.91415
0.20114	0.89234		-0.60211	-0.93716		-0.60133	-0.90628
0.20617	0.89404		-0.60637	-0.93544		-0.60133	-0.89936
0.20762	0.89453		-0.60811	-0.93455		-0.60705	-0.90439
0.21315	0.89383		-0.60854	-0.94197		-0.60796	-0.9068
0.21411	0.89553		-0.60854	-0.94745		-0.60796	-0.90814
0.22018	0.89907		-0.61345	-0.95212		-0.6124	-0.9125
0.22086	0.90207		-0.6152	-0.94894		-0.61419	-0.91237
0.22724	0.90397		-0.6152	-0.94161		-0.61456	-0.90622
0.22784	0.90425		-0.6152	-0.94567		-0.61455	-0.90444
0.23421	0.90585		-0.62063	-0.95517		-0.61959	-0.90577
0.23445	0.90725		-0.622	-0.95835		-0.62121	-0.90154
0.24105	0.90824		-0.622	-0.95434		-0.62121	-0.90646
0.24105	0.90816		-0.622	-0.95047		-0.62121	-0.91069
0.24778	0.90807		-0.62771	-0.95038		-0.62647	-0.90234
0.24778	0.91092		-0.62867	-0.95057		-0.62769	-0.89568
0.25443	0.91189		-0.62867	-0.95008		-0.62769	-0.89568
0.25443	0.91297		-0.63301	-0.95254		-0.62769	-0.90125
0.26119	0.91372		-0.63478	-0.95153		-0.63366	-0.9049
0.26119	0.91745		-0.63532	-0.94836		-0.63455	-0.90538
0.26789	0.91918		-0.63532	-0.94562		-0.63455	-0.90328
0.26789	0.91842		-0.64005	-0.94332		-0.63886	-0.90801
0.27451	0.91963		-0.64181	-0.93845		-0.64058	-0.91251
0.27451	0.92051		-0.64195	-0.93773		-0.64096	-0.91283
0.28118	0.92106		-0.64195	-0.93344		-0.64096	-0.90715
0.2866	0.92139		-0.64691	-0.93164		-0.64598	-0.90591
0.28786	0.9218		-0.64829	-0.9348		-0.64779	-0.90878
0.29358	0.92262		-0.64829	-0.94191		-0.64793	-0.91293
0.29462	0.92362		-0.64829	-0.94299		-0.64793	-0.91677
0.30059	0.92487		-0.65422	-0.93778		-0.65304	-0.91551
0.30146	0.92669		-0.6553	-0.9326		-0.65435	-0.91167
0.30756	0.92683		-0.6553	-0.9244		-0.65434	-0.90997
0.30814	0.92607		-0.65935	-0.92049		-0.65829	-0.90997
0.31455	0.92787		-0.66102	-0.91972		-0.66005	-0.91041
0.31493	0.93093		-0.66161	-0.92062		-0.66065	-0.90736
0.32147	0.93184		-0.66161	-0.92496		-0.66065	-0.91324
0.32147	0.93189		-0.6663	-0.93021		-0.66557	-0.92717
0.32799	0.93113		-0.66807	-0.93072		-0.66743	-0.93717
0.32799	0.93208		-0.66825	-0.93156		-0.66759	-0.93379
0.33459	0.9331		-0.66825	-0.93723		-0.66758	-0.92111
0.33459	0.93325		-0.67345	-0.93992		-0.67254	-0.91118
0.34124	0.93495		-0.67502	-0.94285		-0.67392	-0.90663
0.34124	0.93583		-0.67503	-0.94082		-0.67392	-0.90503
0.34796	0.93604		-0.67503	-0.93381		-0.67392	-0.90479
0.35294	0.93697		-0.68078	-0.93169		-0.67987	-0.90596
0.35447	0.94004		-0.682	-0.94446		-0.68082	-0.90984
0.3599	0.94084		-0.682	-0.95909		-0.68082	-0.91354
0.36122	0.93957		-0.68616	-0.96539		-0.68522	-0.91399
0.36685	0.93914		-0.68793	-0.95947		-0.68698	-0.90653
0.36786	0.93903		-0.68852	-0.94916		-0.68746	-0.89844
0.37384	0.93957		-0.68852	-0.9487		-0.68746	-0.90067
0.37464	0.94113		-0.693	-0.95083		-0.69209	-0.90848
0.38084	0.94165		-0.69468	-0.9501		-0.69379	-0.9162
0.38131	0.94053		-0.69487	-0.94692		-0.69397	-0.91756
0.38789	0.94065		-0.69487	-0.94638		-0.69398	-0.91302
0.38791	0.94207		-0.70005	-0.94338		-0.69904	-0.90668
0.39453	0.94378		-0.70157	-0.93875		-0.70047	-0.9033
0.39453	0.94485		-0.70157	-0.94073		-0.70047	-0.91092
0.40121	0.94505		-0.70157	-0.94455		-0.70047	-0.91113
0.40121	0.94595		-0.70712	-0.94833		-0.70618	-0.90674
0.40811	0.94788		-0.70807	-0.94313		-0.70716	-0.90435
0.40811	0.94816		-0.70807	-0.93365		-0.70717	-0.91041
0.41495	0.94826		-0.71234	-0.93384		-0.71146	-0.91961
0.41495	0.94825		-0.71407	-0.94622		-0.71321	-0.91817
0.42184	0.9482		-0.71452	-0.94883		-0.71382	-0.91245
0.42184	0.94774		-0.71452	-0.94228		-0.71382	-0.9107
0.42874	0.94869		-0.71969	-0.94027		-0.71856	-0.9115
0.42874	0.95162		-0.72153	-0.94566		-0.72034	-0.91809
0.4356	0.95127		-0.72153	-0.95317		-0.72065	-0.92454
0.4356	0.94959		-0.72153	-0.94458		-0.72065	-0.91939
0.44216	0.95109		-0.72688	-0.93193		-0.72557	-0.91769
0.44719	0.95383		-0.72822	-0.92927		-0.72731	-0.92098
0.4487	0.95387		-0.72822	-0.93485		-0.72734	-0.91957
0.45413	0.95412		-0.72822	-0.94008		-0.72734	-0.91663
0.45549	0.95366		-0.73393	-0.94636		-0.73282	-0.91625
0.46116	0.95291		-0.73474	-0.94858		-0.7341	-0.91356
0.46224	0.95404		-0.73474	-0.94488		-0.7341	-0.90804
0.46816	0.956		-0.73919	-0.93785		-0.73411	-0.90935
0.46884	0.9567		-0.74094	-0.93419		-0.74013	-0.90943
0.47515	0.95666		-0.74131	-0.93624		-0.74096	-0.91262
0.47554	0.95762		-0.74131	-0.94249		-0.74095	-0.91869
0.48216	0.95779		-0.74618	-0.94733		-0.74546	-0.92202
0.48231	0.95515		-0.74784	-0.94686		-0.74723	-0.914
0.48914	0.9561		-0.74783	-0.94562		-0.74744	-0.90616
0.48922	0.95697		-0.74783	-0.94336		-0.74744	-0.91282
0.49578	0.95697		-0.75311	-0.94285		-0.75221	-0.91955
0.49577	0.95773		-0.75432	-0.94248		-0.75357	-0.92034
0.50243	0.95842		-0.75432	-0.94553		-0.75357	-0.91824
0.50243	0.95975		-0.75867	-0.94777		-0.75358	-0.91439
0.50933	0.9629		-0.76056	-0.94562		-0.75926	-0.91061
0.50933	0.96293		-0.76131	-0.94335		-0.76025	-0.91384
0.51624	0.95973		-0.76131	-0.9398		-0.76025	-0.92022
0.51624	0.95998		-0.76574	-0.93812		-0.76485	-0.92218
0.5229	0.96126		-0.76744	-0.94427		-0.76673	-0.91648
0.5229	0.96124		-0.7676	-0.95075		-0.76727	-0.90821
0.52952	0.96165		-0.7676	-0.94525		-0.76727	-0.90741
0.52952	0.96303		-0.77292	-0.93484		-0.77199	-0.91029
0.53622	0.96443		-0.7743	-0.93173		-0.77373	-0.92059
0.5416	0.96451		-0.7743	-0.93222		-0.77385	-0.92558
0.54283	0.96319		-0.7743	-0.93102		-0.77384	-0.92343
0.54856	0.96371		-0.77999	-0.93111		-0.7792	-0.9129
0.54963	0.96403		-0.78104	-0.9346		-0.78086	-0.90202
0.55555	0.96435		-0.78104	-0.93665		-0.78086	-0.89808
0.55629	0.96438		-0.78518	-0.93579		-0.78086	-0.90148
0.56259	0.96341		-0.78691	-0.93384		-0.78609	-0.91119
0.56301	0.9613		-0.7875	-0.9424		-0.78725	-0.91834
0.56957	0.9617		-0.7875	-0.95219		-0.78725	-0.92069
0.56957	0.96444		-0.79226	-0.95117		-0.78726	-0.9189
0.57634	0.96593		-0.79405	-0.94492		-0.79341	-0.915
0.57634	0.9667		-0.79432	-0.93898		-0.79439	-0.91217
0.58328	0.96648		-0.79432	-0.93671		-0.79439	-0.91409
0.58328	0.96702		-0.79934	-0.9376		-0.79845	-0.9187
0.58998	0.9664		-0.80087	-0.93682		-0.80009	-0.91408
0.58998	0.96474		-0.80087	-0.93739		-0.80061	-0.90402
0.59663	0.9661		-0.80087	-0.94256		-0.80061	-0.9074
0.59663	0.96846		-0.80647	-0.95029		-0.80569	-0.913
0.60338	0.96925		-0.80763	-0.95037		-0.80759	-0.9115
0.60338	0.96796		-0.80763	-0.94324		-0.80763	-0.90851
0.61001	0.96743		-0.81183	-0.94111		-0.80763	-0.91113
0.61527	0.96845		-0.81361	-0.94495		-0.81248	-0.91531
0.61674	0.97054		-0.81434	-0.95179		-0.8137	-0.91353
0.62225	0.97091		-0.81434	-0.95998		-0.81371	-0.90957
0.62346	0.97042		-0.81873	-0.95992		-0.81371	-0.9098
0.62921	0.96933		-0.82043	-0.95371		-0.81942	-0.90559
0.6301	0.96933		-0.82072	-0.95038		-0.82036	-0.90558
0.63621	0.97067		-0.82072	-0.95042		-0.82035	-0.91034
0.63695	0.97034		-0.82603	-0.95097		-0.82494	-0.91348
0.64321	0.97113		-0.82791	-0.94981		-0.8268	-0.91259
0.64368	0.97313		-0.82792	-0.94724		-0.82709	-0.90758
0.65026	0.97484		-0.82792	-0.94765		-0.82709	-0.90588
0.6504	0.97391		-0.83295	-0.95007		-0.83192	-0.90695
0.65708	0.97231		-0.83427	-0.95108		-0.83348	-0.90218
0.65708	0.97217		-0.83427	-0.9462		-0.83348	-0.89945
0.66372	0.97195		-0.83427	-0.94165		-0.83349	-0.89803
0.66372	0.97132		-0.83987	-0.93894		-0.83927	-0.89194
0.67035	0.97051		-0.84071	-0.93513		-0.84061	-0.88993
0.67035	0.9711		-0.84071	-0.93768		-0.84061	-0.89236
0.67715	0.9736		-0.84525	-0.95048		-0.84061	-0.89609
0.67715	0.97578		-0.84705	-0.95549		-0.84628	-0.90515
0.68386	0.97626		-0.84744	-0.94859		-0.84704	-0.91024
0.68386	0.97494		-0.84744	-0.9358		-0.84705	-0.90906
0.69051	0.97567		-0.85234	-0.92943		-0.85141	-0.90761
0.69051	0.97582		-0.85406	-0.93594		-0.85311	-0.91008
0.69734	0.97674		-0.85406	-0.9403		-0.85351	-0.91131
0.70275	0.97757		-0.85406	-0.94051		-0.85351	-0.91111
0.70397	0.97735		-0.85962	-0.93724		-0.85858	-0.9007
0.70966	0.97813		-0.86093	-0.93657		-0.8604	-0.89355
0.71053	0.97697		-0.86093	-0.93835		-0.86041	-0.89567
0.71664	0.97623		-0.86493	-0.93372		-0.86041	-0.90248
0.71715	0.97674		-0.86668	-0.92687		-0.86541	-0.90973
0.72359	0.97724		-0.86737	-0.91957		-0.8667	-0.91204
0.72378	0.97764		-0.86737	-0.92021		-0.8667	-0.90418
0.73037	0.97917		-0.87191	-0.92665		-0.8667	-0.90258
0.73037	0.97931		-0.87365	-0.93269		-0.87271	-0.90411
0.7372	0.97829		-0.8739	-0.93223		-0.8736	-0.90258
0.7372	0.97872		-0.8739	-0.93762		-0.8736	-0.89895
0.74398	0.97918		-0.87894	-0.94271		-0.87788	-0.90088
0.74398	0.9788		-0.88047	-0.94896		-0.87959	-0.90572
0.75091	0.97731		-0.88047	-0.94785		-0.88005	-0.90642
0.75091	0.97707		-0.88047	-0.93976		-0.88005	-0.90378
0.75767	0.97992		-0.8858	-0.93084		-0.88479	-0.89879
0.75767	0.98105		-0.88682	-0.92523		-0.88653	-0.89665
0.76443	0.98154		-0.88682	-0.92649		-0.88653	-0.9065
0.76443	0.98217		-0.89097	-0.93161		-0.88653	-0.9066
0.77128	0.9813		-0.8927	-0.93253		-0.89176	-0.90293
0.77128	0.97995		-0.89333	-0.9284		-0.89312	-0.90122
0.77815	0.98097		-0.89333	-0.92523		-0.89312	-0.89977
0.77815	0.98174		-0.89806	-0.92318		-0.89312	-0.89815
0.78471	0.98177		-0.89985	-0.92134		-0.89871	-0.9006
0.78471	0.98177		-0.90014	-0.92196		-0.89979	-0.90567
0.7914	0.98078		-0.90014	-0.92239		-0.89979	-0.90918
0.79652	0.98075		-0.90511	-0.92827		-0.90411	-0.90479
0.7979	0.98136		-0.90677	-0.93571		-0.90592	-0.89923
0.80342	0.98151		-0.90677	-0.9383		-0.90662	-0.89905
0.80459	0.98278		-0.90677	-0.93855		-0.90662	-0.89569
0.81031	0.98457		-0.91202	-0.93694		-0.91096	-0.89137
0.81122	0.98559		-0.91316	-0.93532		-0.91263	-0.89052
0.81711	0.98378		-0.91316	-0.93548		-0.91282	-0.89442
0.81788	0.98293		-0.91705	-0.94094		-0.91282	-0.89731
0.82407	0.98365		-0.91872	-0.94636		-0.91794	-0.89051
0.82464	0.98413		-0.91934	-0.94916		-0.91936	-0.88297
0.83097	0.98616		-0.91934	-0.95139		-0.91936	-0.88832
0.83112	0.98685		-0.92376	-0.95122		-0.91936	-0.89845
0.83761	0.98725		-0.92544	-0.94878		-0.92463	-0.90271
0.83761	0.98758		-0.92565	-0.94393		-0.92558	-0.90306
0.84418	0.98639		-0.92566	-0.93249		-0.92557	-0.9008
0.84418	0.98558		-0.93081	-0.9262		-0.92979	-0.8951
0.85057	0.98675		-0.93232	-0.93632		-0.93153	-0.89094
0.85057	0.98701		-0.93232	-0.94031		-0.93211	-0.89198
0.85716	0.98786		-0.93232	-0.94299		-0.93212	-0.89435
0.85716	0.98953		-0.9376	-0.94291		-0.93687	-0.89484
0.8636	0.98961		-0.93857	-0.93986		-0.93865	-0.89137
0.86359	0.98886		-0.93857	-0.93763		-0.93876	-0.88984
0.87028	0.98944		-0.94286	-0.92863		-0.93876	-0.89574
0.87028	0.99053		-0.94463	-0.92046		-0.94386	-0.9003
0.87698	0.99045		-0.94521	-0.92125		-0.94533	-0.89908
0.88224	0.98889		-0.94521	-0.92272		-0.94532	-0.89669
0.88342	0.98838		-0.94972	-0.92216		-0.94532	-0.89704
0.88897	0.98994		-0.95141	-0.92446		-0.95076	-0.89624
0.88986	0.99238		-0.95165	-0.93532		-0.95177	-0.89103
0.89573	0.99286		-0.95166	-0.94616		-0.95177	-0.88917
0.89613	0.99249		-0.95668	-0.94686		-0.95559	-0.88829
0.9025	0.99245		-0.95834	-0.95329		-0.95717	-0.88924
0.90277	0.9919		-0.95833	-0.96105		-0.95768	-0.89003
0.90893	0.99391		-0.95833	-0.95762		-0.95768	-0.89307
0.90893	0.99469		-0.96354	-0.95732		-0.96225	-0.89101
0.91544	0.9922		-0.96485	-0.96299		-0.96396	-0.8886
0.91544	0.99147		-0.96484	-0.96315		-0.96408	-0.89112
0.92192	0.99128		-0.96484	-0.95645		-0.96408	-0.89504
0.92192	0.99109		-0.9703	-0.94684		-0.96942	-0.89593
0.92834	0.99153		-0.97116	-0.94625		-0.9708	-0.89519
0.92833	0.99277		-0.97116	-0.94895		-0.9708	-0.89358
0.93467	0.9927		-0.97529	-0.94133		-0.9708	-0.89074
0.93467	0.99155		-0.97695	-0.93577		-0.97613	-0.88956
0.94105	0.99265		-0.9774	-0.93753		-0.97697	-0.88692
0.94609	0.99499		-0.9774	-0.94201		-0.97697	-0.87916
0.94751	0.99459		-0.98192	-0.93864		-0.98117	-0.87681
0.95274	0.99306		-0.98357	-0.93927		-0.98286	-0.88031
0.95392	0.99292		-0.98362	-0.94877		-0.98339	-0.88263
0.95933	0.99369		-0.98362	-0.96218		-0.9834	-0.87952
0.96048	0.99491		-0.98882	-0.9709		-0.9879	-0.87479
0.96594	0.99654		-0.99022	-0.97096		-0.98953	-0.87681
0.96675	0.99653		-0.99022	-0.96156		-0.98953	-0.88723
0.97252	0.99592		-0.99022	-0.95146		-0.98954	-0.8916
0.97315	0.99581		-0.99524	-0.94066		-0.99431	-0.89157
0.97912	0.99519		-0.99609	-0.93735		-0.99543	-0.89889
0.97935	0.9948		-0.9961	-0.93167		-0.99544	-0.9015
0.99061	0.99411		-1.00157	-0.92531		-0.99542	-0.89593
0.99061	0.99398		-1.00381	-0.92278		-1.00265	-0.89337
1.00306	0.99461		-1.00444	-0.92668		-1.00381	-0.89575
1.00306	0.99381		-1.00444	-0.92968		-1.0038	-0.89397
1.00578	0.9946		-1.00598	-0.93226		-1.00556	-0.88881
1.00578	0.99587		-1.00655	-0.92805		-1.00627	-0.88679
1.00607	0.9954		-1.00659	-0.92702		-1.00647	-0.88681
1.00607	0.99463		-1.00652	-0.96461		-1.00647	-0.88221
--	--		-1.00649	-0.96427		-1.0063	-0.8953
--	--		-1.00649	-0.95905		-1.00392	-0.89652
--	--		-1.00649	-0.94931		-1.00319	-0.89332
--	--		-1.003	-0.93972		-1.00319	-0.88697
--	--		-1.00231	-0.93866		-1.00318	-0.88348
--	--		-1.00231	-0.94109		-0.99886	-0.885
--	--		-0.99884	-0.94629		-0.99788	-0.89029
--	--		-0.99737	-0.9536		-0.99788	-0.89166
			-0.99687	-0.95355		-0.99398	-0.90044
			-0.99687	-0.95063		-0.99229	-0.90921
			-0.9923	-0.94959		-0.99157	-0.91531
			-0.99058	-0.94949		-0.99157	-0.91206
			-0.99041	-0.9545		-0.98733	-0.90688
			-0.99042	-0.95746		-0.98569	-0.90358
			-0.98545	-0.95444		-0.98529	-0.90032
			-0.98387	-0.94765		-0.98529	-0.90011
			-0.98387	-0.94294		-0.98056	-0.90511
			-0.98387	-0.94742		-0.97886	-0.90828
			-0.97872	-0.95558		-0.97886	-0.90673
			-0.97756	-0.95487		-0.97886	-0.90642
			-0.97756	-0.95468		-0.97364	-0.90629
			-0.97756	-0.95731		-0.9724	-0.90421
			-0.97216	-0.96149		-0.97239	-0.90167
			-0.97141	-0.96173		-0.97239	-0.89813
			-0.97141	-0.96356		-0.96688	-0.89447
			-0.96685	-0.96471		-0.96608	-0.89464
			-0.96506	-0.95379		-0.96608	-0.89613
			-0.96463	-0.9505		-0.96167	-0.89774
			-0.96463	-0.9581		-0.95992	-0.90087
			-0.95984	-0.95726		-0.9594	-0.90194
			-0.9581	-0.94895		-0.9594	-0.90282
			-0.95802	-0.94431		-0.95477	-0.90499
			-0.95802	-0.95091		-0.95306	-0.90358
			-0.95326	-0.95673		-0.95288	-0.8951
			-0.9519	-0.95705		-0.95288	-0.88554
			-0.9519	-0.9595		-0.9481	-0.88416
			-0.9519	-0.96506		-0.94663	-0.88487
			-0.94634	-0.96822		-0.94663	-0.89086
			-0.94535	-0.96661		-0.94664	-0.90255
			-0.94535	-0.96381		-0.94104	-0.91343
			-0.94103	-0.96566		-0.93992	-0.91554
			-0.93927	-0.96526		-0.93992	-0.91486
			-0.93879	-0.9648		-0.93603	-0.90886
			-0.93879	-0.961		-0.9344	-0.90612
			-0.93426	-0.9561		-0.93374	-0.91338
			-0.9326	-0.9499		-0.93373	-0.91438
			-0.9325	-0.94772		-0.92898	-0.91128
			-0.9325	-0.95212		-0.92715	-0.90538
			-0.92731	-0.95525		-0.92681	-0.90176
			-0.92572	-0.96066		-0.92681	-0.90007
			-0.92572	-0.96164		-0.92217	-0.89666
			-0.92572	-0.95645		-0.92063	-0.89286
			-0.92037	-0.95279		-0.92062	-0.89281
			-0.91923	-0.95675		-0.92062	-0.89583
			-0.91923	-0.96255		-0.91499	-0.90152
			-0.91923	-0.96354		-0.91377	-0.91045
			-0.91319	-0.95947		-0.91377	-0.91158
			-0.91236	-0.95654		-0.90981	-0.90717
			-0.91236	-0.96503		-0.90811	-0.90311
			-0.90812	-0.98044		-0.90744	-0.90412
			-0.90645	-0.9794		-0.90744	-0.9068
			-0.90604	-0.9699		-0.90314	-0.90853
			-0.90604	-0.95913		-0.9015	-0.90513
			-0.90135	-0.94885		-0.90127	-0.89899
			-0.89964	-0.94154		-0.90126	-0.89425
			-0.89963	-0.93929		-0.89595	-0.89406
			-0.89963	-0.93732		-0.89435	-0.89976
			-0.89439	-0.93664		-0.89435	-0.90117
			-0.89301	-0.94003		-0.89435	-0.89705
			-0.89301	-0.94409		-0.88921	-0.89305
			-0.89301	-0.94727		-0.8883	-0.89147
			-0.88742	-0.94853		-0.8883	-0.89471
			-0.88658	-0.94565		-0.88399	-0.89527
			-0.88657	-0.94206		-0.88223	-0.89545
			-0.88216	-0.93619		-0.88169	-0.90018
			-0.88041	-0.93741		-0.88169	-0.90395
			-0.87994	-0.94348		-0.87675	-0.90797
			-0.87994	-0.94621		-0.87491	-0.91088
			-0.87512	-0.94669		-0.87473	-0.90355
			-0.8734	-0.94333		-0.87473	-0.89298
			-0.8734	-0.94864		-0.86977	-0.89239
			-0.8734	-0.94879		-0.86835	-0.89279
			-0.86813	-0.9466		-0.86835	-0.89259
			-0.86679	-0.94549		-0.86835	-0.89493
			-0.86679	-0.94311		-0.86281	-0.89901
			-0.86679	-0.94702		-0.86176	-0.89803
			-0.86113	-0.95859		-0.86176	-0.88996
			-0.86012	-0.96551		-0.85755	-0.88927
			-0.86012	-0.97063		-0.85579	-0.89041
			-0.85555	-0.97222		-0.85527	-0.89224
			-0.85367	-0.96566		-0.85527	-0.9
			-0.85323	-0.95816		-0.85049	-0.90565
			-0.85324	-0.95363		-0.84872	-0.90407
			-0.84842	-0.95245		-0.84869	-0.89697
			-0.84669	-0.95401		-0.8487	-0.88987
			-0.8467	-0.95161		-0.84352	-0.88963
			-0.84669	-0.94465		-0.84231	-0.89606
			-0.84141	-0.94488		-0.84231	-0.90076
			-0.83996	-0.95184		-0.84231	-0.89953
			-0.83996	-0.95408		-0.83652	-0.89804
			-0.83996	-0.9592		-0.83573	-0.89846
			-0.83439	-0.96093		-0.83573	-0.90678
			-0.8333	-0.95797		-0.83097	-0.9097
			-0.8333	-0.96496		-0.82909	-0.90592
			-0.82908	-0.96781		-0.82859	-0.90385
			-0.82731	-0.96052		-0.82859	-0.90196
			-0.82658	-0.95273		-0.82378	-0.89987
			-0.82658	-0.94693		-0.82205	-0.89562
			-0.82197	-0.94481		-0.82205	-0.8906
			-0.82019	-0.94773		-0.82205	-0.88342
			-0.81985	-0.95032		-0.81706	-0.88534
			-0.81985	-0.96105		-0.81575	-0.89827
			-0.8151	-0.96903		-0.81576	-0.90769
			-0.8134	-0.96781		-0.81576	-0.90409
			-0.8134	-0.96306		-0.81008	-0.89394
			-0.8134	-0.96166		-0.80916	-0.89476
			-0.808	-0.95938		-0.80916	-0.9028
			-0.8067	-0.95754		-0.80451	-0.90102
			-0.8067	-0.95732		-0.80263	-0.89914
			-0.80669	-0.95468		-0.80218	-0.89658
			-0.80091	-0.96094		-0.80218	-0.89796
			-0.80011	-0.96352		-0.79758	-0.8959
			-0.80011	-0.96168		-0.79592	-0.89063
			-0.79558	-0.96201		-0.79588	-0.88697
			-0.7938	-0.96284		-0.79587	-0.88491
			-0.79341	-0.96105		-0.79055	-0.88894
			-0.79342	-0.96473		-0.78938	-0.8946
			-0.7886	-0.96614		-0.78937	-0.89385
			-0.78691	-0.97127		-0.78939	-0.88579
			-0.78691	-0.97603		-0.78347	-0.88275
			-0.78691	-0.97162		-0.78262	-0.88771
			-0.78146	-0.96403		-0.78262	-0.88842
			-0.78018	-0.95602		-0.77789	-0.89049
			-0.78018	-0.94972		-0.77601	-0.89949
			-0.78018	-0.95175		-0.7755	-0.90756
			-0.77426	-0.95981		-0.7755	-0.90543
			-0.77341	-0.96442		-0.77081	-0.90246
			-0.77341	-0.96666		-0.76909	-0.90151
			-0.76889	-0.96545		-0.76893	-0.9054
			-0.76711	-0.95377		-0.76893	-0.9105
			-0.76676	-0.94634		-0.76391	-0.91188
			-0.76676	-0.94466		-0.7625	-0.91026
			-0.7619	-0.94161		-0.7625	-0.90902
			-0.76025	-0.94553		-0.7625	-0.90684
			-0.76025	-0.95505		-0.75672	-0.90474
			-0.76025	-0.96245		-0.75582	-0.90124
			-0.75463	-0.9662		-0.75582	-0.89922
			-0.75331	-0.9688		-0.75143	-0.89838
			-0.75331	-0.96862		-0.74968	-0.89727
			-0.7533	-0.96539		-0.74917	-0.90179
			-0.74754	-0.96519		-0.74917	-0.90413
			-0.74673	-0.96842		-0.74441	-0.90913
			-0.74672	-0.9702		-0.74269	-0.91622
			-0.74242	-0.9657		-0.74269	-0.91461
			-0.74073	-0.95354		-0.74269	-0.90815
			-0.74031	-0.94805		-0.73722	-0.90662
			-0.74031	-0.95051		-0.736	-0.90257
			-0.73535	-0.94642		-0.736	-0.89891
			-0.73355	-0.94411		-0.73172	-0.89854
			-0.73344	-0.94562		-0.72988	-0.90387
			-0.73344	-0.95266		-0.72914	-0.9088
			-0.72809	-0.95745		-0.72914	-0.90723
			-0.72657	-0.95317		-0.72454	-0.89603
			-0.72657	-0.95268		-0.72277	-0.88586
			-0.72657	-0.96085		-0.72253	-0.88872
			-0.72122	-0.96537		-0.72253	-0.89415
			-0.72026	-0.9644		-0.71779	-0.89518
			-0.72026	-0.96281		-0.71631	-0.8928
			-0.71576	-0.96152		-0.71631	-0.89206
			-0.71391	-0.96005		-0.71631	-0.89365
			-0.71345	-0.96669		-0.7108	-0.89204
			-0.71344	-0.96886		-0.70957	-0.89576
			-0.70869	-0.96308		-0.70956	-0.90099
			-0.70712	-0.95899		-0.70547	-0.90533
			-0.70712	-0.96013		-0.7037	-0.90839
			-0.70713	-0.96571		-0.70295	-0.9088
			-0.70143	-0.97015		-0.70295	-0.90947
			-0.70028	-0.96798		-0.69813	-0.91047
			-0.70028	-0.9666		-0.69626	-0.90956
			-0.69613	-0.96632		-0.6959	-0.90444
			-0.69437	-0.96287		-0.6959	-0.90364
			-0.69369	-0.96012		-0.69122	-0.90678
			-0.69369	-0.96294		-0.68962	-0.91015
			-0.68915	-0.97006		-0.68962	-0.91239
			-0.68741	-0.97244		-0.68962	-0.91229
			-0.68711	-0.97081		-0.68392	-0.90989
			-0.68711	-0.97187		-0.68266	-0.91117
			-0.68199	-0.96472		-0.68266	-0.92054
			-0.6803	-0.95794		-0.67867	-0.92458
			-0.6803	-0.95845		-0.67695	-0.92245
			-0.6803	-0.96314		-0.67632	-0.91678
			-0.67511	-0.96386		-0.67632	-0.91641
			-0.67397	-0.96525		-0.67156	-0.91744
			-0.67397	-0.96263		-0.66975	-0.90985
			-0.67397	-0.95668		-0.66958	-0.90018
			-0.66776	-0.95247		-0.66958	-0.89746
			-0.66691	-0.95403		-0.66437	-0.90209
			-0.66691	-0.96146		-0.66291	-0.90801
			-0.66247	-0.96741		-0.66291	-0.91146
			-0.66072	-0.97177		-0.66291	-0.91263
			-0.66037	-0.97472		-0.65721	-0.90962
			-0.66037	-0.96866		-0.65627	-0.90301
			-0.65543	-0.96012		-0.65627	-0.89465
			-0.6538	-0.957		-0.65192	-0.89204
			-0.6538	-0.96101		-0.65016	-0.89511
			-0.6538	-0.96167		-0.64959	-0.89808
			-0.64828	-0.95959		-0.64959	-0.90298
			-0.64714	-0.95919		-0.64478	-0.90511
			-0.64714	-0.96325		-0.64298	-0.90024
			-0.64315	-0.97061		-0.64284	-0.8935
			-0.64146	-0.97486		-0.64284	-0.8888
			-0.64092	-0.97629		-0.63775	-0.89173
			-0.64092	-0.97828		-0.63631	-0.90207
			-0.63609	-0.97641		-0.63631	-0.90681
			-0.63429	-0.967		-0.63632	-0.90874
			-0.63422	-0.95949		-0.63071	-0.90683
			-0.63422	-0.96037		-0.62978	-0.90291
			-0.62903	-0.96242		-0.62978	-0.90341
			-0.62762	-0.96493		-0.62549	-0.90859
			-0.62762	-0.969		-0.62375	-0.91252
			-0.62762	-0.96984		-0.62326	-0.91294
			-0.6221	-0.96755		-0.62327	-0.90857
			-0.62114	-0.96936		-0.61859	-0.90649
			-0.62114	-0.96438		-0.61687	-0.90741
			-0.6168	-0.95699		-0.6168	-0.90734
			-0.61501	-0.95446		-0.6168	-0.91155
			-0.6144	-0.95488		-0.61168	-0.91794
			-0.6144	-0.95586		-0.6103	-0.91738
			-0.60971	-0.95851		-0.61031	-0.90792
			-0.60795	-0.96069		-0.61031	-0.89837
			-0.60768	-0.95824		-0.60439	-0.89375
			-0.60767	-0.95629		-0.60329	-0.89558
			-0.60257	-0.95709		-0.60329	-0.89309
			-0.6009	-0.96001		-0.59906	-0.8882
			-0.6009	-0.96208		-0.59731	-0.89105
			-0.60091	-0.96349		-0.59677	-0.90232
			-0.59533	-0.96098		-0.59677	-0.90471
			-0.59422	-0.958		-0.59188	-0.89869
			-0.59422	-0.95873		-0.59006	-0.89734
			-0.5902	-0.96318		-0.58996	-0.90505
			-0.58851	-0.96688		-0.58995	-0.9124
			-0.58785	-0.96243		-0.58509	-0.91247
			-0.58785	-0.9603		-0.58384	-0.90842
			-0.58312	-0.96447		-0.58384	-0.90553
			-0.5813	-0.96083		-0.58383	-0.90821
			-0.58098	-0.94836		-0.57775	-0.90818
			-0.58098	-0.94005		-0.57673	-0.90509
			-0.576	-0.94024		-0.57673	-0.90213
			-0.57425	-0.94207		-0.57266	-0.90021
			-0.57425	-0.94432		-0.571	-0.90193
			-0.57425	-0.95126		-0.57055	-0.9004
			-0.56877	-0.95856		-0.57054	-0.89963
			-0.56753	-0.96273		-0.56556	-0.90205
			-0.56753	-0.95958		-0.56373	-0.90173
			-0.56344	-0.95643		-0.56366	-0.90001
			-0.56167	-0.96021		-0.56366	-0.89785
			-0.56099	-0.9621		-0.5586	-0.89223
			-0.56099	-0.96024		-0.55727	-0.88824
			-0.55644	-0.96177		-0.55727	-0.89063
			-0.55469	-0.9691		-0.55727	-0.89
			-0.55458	-0.96922		-0.55134	-0.88627
			-0.55458	-0.9611		-0.55039	-0.88599
			-0.5495	-0.95473		-0.55039	-0.89309
			-0.54817	-0.95784		-0.54613	-0.90157
			-0.54817	-0.95932		-0.54442	-0.90343
			-0.54817	-0.94862		-0.54382	-0.90405
			-0.54231	-0.94141		-0.54382	-0.89984
			-0.54145	-0.94717		-0.53908	-0.89399
			-0.54145	-0.95629		-0.5373	-0.89221
			-0.53716	-0.9596		-0.53707	-0.89255
			-0.53546	-0.96278		-0.53707	-0.89849
			-0.53507	-0.96592		-0.53216	-0.9131
			-0.53507	-0.96397		-0.53066	-0.91824
			-0.53015	-0.95899		-0.53066	-0.90943
			-0.52837	-0.95233		-0.53066	-0.90227
			-0.52836	-0.946		-0.52529	-0.89938
			-0.52836	-0.94485		-0.52417	-0.89706
			-0.52324	-0.94462		-0.52417	-0.8905
			-0.52197	-0.94444		-0.51977	-0.88839
			-0.52196	-0.94907		-0.5179	-0.89197
			-0.52196	-0.95528		-0.51716	-0.89707
			-0.51626	-0.96158		-0.51716	-0.90362
			-0.51528	-0.96187		-0.51273	-0.90124
			-0.51528	-0.95543		-0.51103	-0.89031
			-0.5109	-0.9533		-0.51075	-0.88278
			-0.50911	-0.95334		-0.51075	-0.88078
			-0.50851	-0.94949		-0.50562	-0.88528
			-0.50851	-0.94407		-0.5039	-0.8934
			-0.50395	-0.94051		-0.5039	-0.89991
			-0.50224	-0.93986		-0.5039	-0.90094
			-0.50196	-0.9403		-0.49889	-0.89781
			-0.50196	-0.94007		-0.49784	-0.8947
			-0.49694	-0.93877		-0.49784	-0.89465
			-0.49517	-0.94135		-0.49784	-0.89353
			-0.49516	-0.94551		-0.49192	-0.88893
			-0.49515	-0.9441		-0.49108	-0.88763
			-0.48993	-0.94386		-0.49108	-0.89157
			-0.48865	-0.94809		-0.48654	-0.89633
			-0.48865	-0.95129		-0.48474	-0.89735
			-0.48865	-0.95032		-0.48433	-0.89706
			-0.48292	-0.94976		-0.48433	-0.90158
			-0.48208	-0.94524		-0.47944	-0.9061
			-0.48208	-0.94317		-0.47769	-0.90614
			-0.47747	-0.94854		-0.47769	-0.90205
			-0.47564	-0.94894		-0.47769	-0.89935
			-0.47531	-0.94435		-0.47226	-0.89986
			-0.47531	-0.94777		-0.47087	-0.90028
			-0.47051	-0.94904		-0.47086	-0.90301
			-0.46902	-0.94544		-0.47086	-0.90821
			-0.46902	-0.94852		-0.46547	-0.90751
			-0.46903	-0.95031		-0.46452	-0.90155
			-0.46334	-0.94607		-0.46452	-0.90504
			-0.46218	-0.93972		-0.46014	-0.90892
			-0.46218	-0.93513		-0.45833	-0.90687
			-0.45819	-0.93194		-0.45775	-0.89746
			-0.45651	-0.9333		-0.45776	-0.90128
			-0.45592	-0.93695		-0.45305	-0.90838
			-0.45592	-0.94023		-0.4513	-0.90433
			-0.4513	-0.93978		-0.45121	-0.89624
			-0.44955	-0.93782		-0.45121	-0.89722
			-0.44933	-0.939		-0.44623	-0.89746
			-0.44933	-0.94578		-0.445	-0.89252
			-0.44442	-0.95484		-0.445	-0.89193
			-0.44283	-0.95575		-0.445	-0.89123
			-0.44283	-0.95683		-0.43896	-0.89039
			-0.44283	-0.95824		-0.43804	-0.89692
			-0.43731	-0.95627		-0.43804	-0.90111
			-0.43603	-0.95107		-0.43389	-0.89407
			-0.43603	-0.9435		-0.43223	-0.88794
			-0.43603	-0.93764		-0.43177	-0.89103
			-0.43011	-0.93521		-0.43177	-0.8903
			-0.42924	-0.93403		-0.42697	-0.88753
			-0.42924	-0.9362		-0.42527	-0.88434
			-0.42496	-0.93728		-0.42527	-0.88226
			-0.42327	-0.93969		-0.42527	-0.88744
			-0.42291	-0.9402		-0.41994	-0.89768
			-0.42291	-0.93786		-0.41878	-0.89952
			-0.41815	-0.93276		-0.41878	-0.89788
			-0.4165	-0.92731		-0.41452	-0.89289
			-0.4165	-0.92683		-0.4127	-0.88787
			-0.4165	-0.93215		-0.41199	-0.88595
			-0.41089	-0.93714		-0.41198	-0.88538
			-0.40952	-0.9408		-0.40743	-0.88483
			-0.40952	-0.94309		-0.40568	-0.88567
			-0.40952	-0.94235		-0.40537	-0.88657
			-0.40397	-0.94449		-0.40537	-0.88472
			-0.40321	-0.94509		-0.40039	-0.88549
			-0.40321	-0.94155		-0.39882	-0.88521
			-0.39883	-0.93884		-0.39882	-0.88789
			-0.39712	-0.93417		-0.39882	-0.8889
			-0.39681	-0.93364		-0.39343	-0.88595
			-0.39681	-0.93517		-0.39227	-0.88586
			-0.39161	-0.9333		-0.39227	-0.88671
			-0.39008	-0.93799		-0.38839	-0.88417
			-0.39008	-0.94426		-0.38673	-0.88319
			-0.39008	-0.94224		-0.3861	-0.88598
			-0.3846	-0.93825		-0.3861	-0.88784
			-0.38348	-0.92868		-0.38153	-0.88594
			-0.38348	-0.9232		-0.37978	-0.88564
			-0.3794	-0.92355		-0.37954	-0.88966
			-0.37766	-0.92431		-0.37954	-0.89142
			-0.37693	-0.92531		-0.3744	-0.88895
			-0.37693	-0.92594		-0.37283	-0.88608
			-0.37253	-0.92534		-0.37283	-0.88805
			-0.37083	-0.92801		-0.37283	-0.88651
			-0.37047	-0.93382		-0.36749	-0.88242
			-0.37047	-0.93884		-0.36649	-0.88264
			-0.36567	-0.93903		-0.36649	-0.8887
			-0.36399	-0.93804		-0.36206	-0.89172
			-0.36399	-0.93887		-0.36023	-0.89133
			-0.36399	-0.93831		-0.3597	-0.89482
			-0.3586	-0.93345		-0.35969	-0.8962
			-0.3573	-0.92826		-0.35507	-0.89662
			-0.3573	-0.9271		-0.35335	-0.89703
			-0.3573	-0.92726		-0.35328	-0.89563
			-0.35137	-0.92486		-0.35328	-0.88784
			-0.35043	-0.91918		-0.34829	-0.88062
			-0.35043	-0.91628		-0.34688	-0.88074
			-0.34635	-0.91693		-0.34688	-0.88519
			-0.34471	-0.91977		-0.34688	-0.88764
			-0.34404	-0.92247		-0.34144	-0.88094
			-0.34404	-0.92471		-0.34044	-0.87577
			-0.33934	-0.92815		-0.34044	-0.88106
			-0.33753	-0.93285		-0.33615	-0.88568
			-0.33718	-0.93322		-0.33438	-0.8873
			-0.33718	-0.93449		-0.33383	-0.88989
			-0.33226	-0.93881		-0.33383	-0.88741
			-0.33061	-0.93895		-0.32912	-0.88373
			-0.33061	-0.93643		-0.32737	-0.88246
			-0.33061	-0.93245		-0.32726	-0.8792
			-0.32544	-0.93474		-0.32726	-0.88301
			-0.32432	-0.93679		-0.3222	-0.88461
			-0.32432	-0.93411		-0.32088	-0.88394
			-0.32025	-0.93089		-0.32087	-0.88599
			-0.31851	-0.92806		-0.32087	-0.88256
			-0.31792	-0.92358		-0.31492	-0.87762
			-0.31792	-0.91781		-0.31387	-0.88338
			-0.31322	-0.91782		-0.31387	-0.88675
			-0.31145	-0.91996		-0.30979	-0.8869
			-0.31133	-0.92358		-0.30811	-0.88774
			-0.31133	-0.92668		-0.30754	-0.8877
			-0.30611	-0.92665		-0.30754	-0.89136
			-0.30463	-0.92515		-0.3029	-0.8913
			-0.30463	-0.92465		-0.30115	-0.88153
			-0.30463	-0.92449		-0.30102	-0.8702
			-0.29929	-0.92243		-0.30102	-0.86815
			-0.29828	-0.9205		-0.29588	-0.86862
			-0.29828	-0.9192		-0.29434	-0.86523
			-0.29383	-0.91274		-0.29434	-0.86596
			-0.29198	-0.91448		-0.29434	-0.87434
			-0.29131	-0.92066		-0.2887	-0.88398
			-0.29131	-0.91898		-0.28747	-0.88687
			-0.28697	-0.91433		-0.28747	-0.89002
			-0.28532	-0.91432		-0.28341	-0.8937
			-0.28509	-0.91608		-0.28165	-0.89312
			-0.28509	-0.91464		-0.28102	-0.88324
			-0.28002	-0.91386		-0.28102	-0.87255
			-0.27843	-0.91637		-0.27639	-0.86565
			-0.27843	-0.91747		-0.27464	-0.86862
			-0.27843	-0.91524		-0.27432	-0.8747
			-0.27287	-0.9153		-0.27432	-0.87407
			-0.27167	-0.91866		-0.26936	-0.87699
			-0.27167	-0.91554		-0.26779	-0.88391
			-0.27167	-0.90902		-0.26779	-0.87895
			-0.26608	-0.90672		-0.26779	-0.87396
			-0.26533	-0.90945		-0.26254	-0.87433
			-0.26533	-0.9138		-0.26149	-0.87676
			-0.26086	-0.91314		-0.26149	-0.88189
			-0.2591	-0.9084		-0.25732	-0.88176
			-0.25872	-0.90408		-0.25557	-0.88057
			-0.25872	-0.90394		-0.25491	-0.88153
			-0.25387	-0.90557		-0.25491	-0.8786
			-0.25223	-0.9077		-0.25045	-0.87285
			-0.25223	-0.91115		-0.24875	-0.87126
			-0.25223	-0.91156		-0.24851	-0.86898
			-0.24681	-0.90964		-0.24851	-0.86768
			-0.24577	-0.90823		-0.24351	-0.8665
			-0.24577	-0.90696		-0.24203	-0.86296
			-0.2415	-0.90498		-0.24203	-0.86416
			-0.23973	-0.90691		-0.24203	-0.85888
			-0.23934	-0.90865		-0.23645	-0.8537
			-0.23934	-0.90868		-0.23541	-0.85544
			-0.23438	-0.90501		-0.23541	-0.85724
			-0.23272	-0.90187		-0.23127	-0.85914
			-0.23272	-0.89924		-0.22955	-0.86486
			-0.23272	-0.8949		-0.22892	-0.86749
			-0.22738	-0.89159		-0.22892	-0.87308
			-0.22618	-0.89162		-0.22407	-0.87489
			-0.22618	-0.89101		-0.22222	-0.87742
			-0.22618	-0.88963		-0.22189	-0.87568
			-0.22052	-0.88951		-0.22189	-0.87335
			-0.2197	-0.89042		-0.21719	-0.87123
			-0.2197	-0.89209		-0.21563	-0.87215
			-0.21524	-0.89533		-0.21563	-0.87142
			-0.21348	-0.89496		-0.21563	-0.86467
			-0.21304	-0.89331		-0.21016	-0.86093
			-0.21304	-0.89855		-0.20899	-0.86164
			-0.20802	-0.90002		-0.20899	-0.86363
			-0.20625	-0.89589		-0.2047	-0.86511
			-0.20625	-0.89057		-0.20286	-0.86279
			-0.20624	-0.88707		-0.20209	-0.86443
			-0.2009	-0.8873		-0.20209	-0.86793
			-0.19956	-0.89245		-0.19757	-0.86609
			-0.19956	-0.8916		-0.19581	-0.86239
			-0.19956	-0.88806		-0.19563	-0.85648
			-0.19409	-0.88479		-0.19563	-0.85317
			-0.19324	-0.88436		-0.19056	-0.85139
			-0.19324	-0.88519		-0.18923	-0.85064
			-0.18878	-0.88269		-0.18923	-0.85228
			-0.18699	-0.88019		-0.18923	-0.85462
			-0.18645	-0.87476		-0.18353	-0.85261
			-0.18645	-0.86825		-0.18259	-0.8538
			-0.18182	-0.8677		-0.18259	-0.85565
			-0.1801	-0.86967		-0.17834	-0.85283
			-0.17997	-0.87036		-0.17661	-0.85182
			-0.17997	-0.87204		-0.17609	-0.84812
			-0.17472	-0.87037		-0.17609	-0.8477
			-0.17332	-0.86396		-0.17156	-0.84825
			-0.17331	-0.86041		-0.16988	-0.8478
			-0.17331	-0.86085		-0.16978	-0.84327
			-0.16764	-0.86539		-0.16978	-0.83992
			-0.16664	-0.86927		-0.16465	-0.83951
			-0.16664	-0.87092		-0.16327	-0.83903
			-0.16249	-0.87004		-0.16327	-0.83303
			-0.16079	-0.86783		-0.16327	-0.83282
			-0.16036	-0.86354		-0.15763	-0.83461
			-0.16036	-0.8598		-0.15668	-0.83367
			-0.15539	-0.8545		-0.15668	-0.83294
			-0.15358	-0.84778		-0.15223	-0.83415
			-0.15358	-0.84772		-0.15042	-0.83589
			-0.15358	-0.84683		-0.14989	-0.83776
			-0.14834	-0.84581		-0.14989	-0.83334
			-0.1469	-0.84691		-0.14526	-0.82682
			-0.1469	-0.84718		-0.14354	-0.82473
			-0.1469	-0.84389		-0.14335	-0.82548
			-0.14156	-0.83868		-0.14335	-0.82348
			-0.14053	-0.83598		-0.13833	-0.8214
			-0.14053	-0.84106		-0.13685	-0.82094
			-0.13641	-0.84167		-0.13685	-0.81972
			-0.13469	-0.83502		-0.13685	-0.82197
			-0.13406	-0.8261		-0.13122	-0.82368
			-0.13406	-0.81819		-0.13011	-0.82396
			-0.12936	-0.82156		-0.13011	-0.81914
			-0.12758	-0.8241		-0.12598	-0.8144
			-0.12737	-0.82503		-0.12425	-0.8147
			-0.12737	-0.82374		-0.12376	-0.81462
			-0.1221	-0.81858		-0.12376	-0.81182
			-0.12053	-0.81344		-0.11876	-0.80909
			-0.12053	-0.80934		-0.11698	-0.8085
			-0.12053	-0.80879		-0.11698	-0.808
			-0.1151	-0.81142		-0.11698	-0.80326
			-0.11401	-0.81186		-0.11189	-0.7961
			-0.11401	-0.80661		-0.1106	-0.79392
			-0.10974	-0.79834		-0.1106	-0.79417
			-0.10793	-0.79503		-0.10649	-0.7928
			-0.10721	-0.7962		-0.10465	-0.7894
			-0.10721	-0.79583		-0.1039	-0.78696
			-0.10269	-0.78979		-0.1039	-0.7894
			-0.10095	-0.7815		-0.09931	-0.791
			-0.10073	-0.77601		-0.09754	-0.78515
			-0.10073	-0.77304		-0.09721	-0.77509
			-0.09562	-0.77242		-0.09721	-0.76627
			-0.09398	-0.76708		-0.09227	-0.76597
			-0.09398	-0.75752		-0.09069	-0.76412
			-0.09397	-0.75199		-0.09069	-0.76097
			-0.08865	-0.75208		-0.09069	-0.76042
			-0.08764	-0.7539		-0.08537	-0.7616
			-0.08764	-0.75277		-0.08401	-0.75687
			-0.08335	-0.75087		-0.08401	-0.74749
			-0.08157	-0.74678		-0.08401	-0.74049
			-0.08098	-0.74132		-0.07823	-0.73389
			-0.08098	-0.73497		-0.0771	-0.7326
			-0.07646	-0.72744		-0.0771	-0.73112
			-0.07477	-0.72175		-0.07299	-0.72485
			-0.07465	-0.7152		-0.07126	-0.71882
			-0.07465	-0.70831		-0.0706	-0.71329
			-0.0695	-0.70314		-0.0706	-0.70818
			-0.06801	-0.69814		-0.06588	-0.70369
			-0.06801	-0.69433		-0.06408	-0.69997
			-0.06801	-0.69126		-0.06384	-0.69366
			-0.06217	-0.68535		-0.06384	-0.68847
			-0.0611	-0.67716		-0.05881	-0.68322
			-0.0611	-0.668		-0.05738	-0.67452
			-0.05688	-0.65832		-0.05738	-0.66828
			-0.05513	-0.64965		-0.05738	-0.66409
			-0.05459	-0.64315		-0.05209	-0.65544
			-0.05459	-0.63425		-0.0512	-0.64337
			-0.05002	-0.62389		-0.0512	-0.63137
			-0.04832	-0.61173		-0.0466	-0.62282
			-0.04814	-0.59958		-0.04473	-0.61386
			-0.04814	-0.58795		-0.04436	-0.60209
			-0.04276	-0.57536		-0.04436	-0.59027
			-0.04109	-0.56407		-0.03966	-0.57887
			-0.04109	-0.5521		-0.03813	-0.56886
			-0.04109	-0.53924		-0.03813	-0.55861
			-0.03594	-0.52609		-0.03813	-0.54586
			-0.03491	-0.51446		-0.03291	-0.53301
			-0.03491	-0.50531		-0.03185	-0.52017
			-0.03091	-0.49409		-0.03185	-0.50358
			-0.02924	-0.4768		-0.02753	-0.48545
			-0.0286	-0.45945		-0.02571	-0.46747
			-0.0286	-0.44094		-0.02499	-0.45058
			-0.0239	-0.42133		-0.02499	-0.43116
			-0.02211	-0.40059		-0.02055	-0.40868
			-0.02175	-0.37932		-0.01884	-0.38729
			-0.02175	-0.35822		-0.0185	-0.36672
			-0.01691	-0.33753		-0.0185	-0.34357
			-0.01532	-0.31384		-0.0137	-0.31799
			-0.01532	-0.28835		-0.01199	-0.29064
			-0.01531	-0.26201		-0.01193	-0.26193
			-0.01012	-0.23438		-0.01193	-0.23026
			-0.00899	-0.2058		-0.00328	-0.1959
			-0.00899	-0.17463		-0.000995056	-0.14771
			-0.0015	-0.12494		-0.000995198	-0.06148
			0.00172	-0.04957		-0.000995198	0.02543
			0.0031	0.02645		0.00366	0.08665
			0.0031	0.07247		0.00436	0.12204
			0.00515	0.10378		0.00436	0.14444
			0.00595	0.12205		0.0073	0.16504
			0.0061	0.14129		0.00847	0.18724
			0.0061	0.16389		0.00871	0.21024
			0.0101	0.1885		0.00871	0.23471
			0.01146	0.21288		0.0128	0.26106
			0.01146	0.2343		0.01424	0.28779
			0.01146	0.25653		0.01424	0.31362
			0.01631	0.28024		0.01424	0.33577
			0.01764	0.30543		0.01926	0.35718
			0.01764	0.32898		0.02056	0.38111
			0.01764	0.35125		0.02056	0.40556
			0.02295	0.37257		0.02056	0.42505
			0.02397	0.39111		0.02636	0.44487
			0.02397	0.40943		0.02719	0.46602
			0.02809	0.42764		0.02719	0.48529
			0.02981	0.44526		0.03151	0.5019
			0.03055	0.46204		0.03322	0.51916
			0.03055	0.47894		0.03373	0.53523
			0.03504	0.4966		0.03373	0.55087
			0.03679	0.51359		0.03835	0.5652
			0.03712	0.52725		0.04007	0.57865
			0.03712	0.53903		0.04017	0.58957
			0.0423	0.55282		0.04017	0.59999
			0.04404	0.5656		0.04583	0.61223
			0.04404	0.57952		0.04748	0.62265
			0.04404	0.5944		0.04748	0.63245
			0.04984	0.60411		0.04748	0.64374
			0.05121	0.61324		0.05306	0.66049
			0.05121	0.6237		0.05415	0.67305
			0.05121	0.63566		0.05415	0.68084
			0.05708	0.64678		0.05846	0.68651
			0.05793	0.65456		0.06026	0.69339
			0.05794	0.66041		0.06095	0.70059
			0.06254	0.66817		0.06095	0.70326
			0.06436	0.67505		0.06581	0.70697
			0.0648	0.6816		0.06767	0.71361
			0.0648	0.69009		0.06802	0.72109
			0.06946	0.70167		0.06802	0.73042
			0.07103	0.71259		0.07304	0.73387
			0.07103	0.71957		0.07479	0.73439
			0.07103	0.72417		0.07479	0.73671
			0.07646	0.72682		0.07479	0.73892
			0.07762	0.73273		0.08007	0.74089
			0.07762	0.74501		0.08141	0.74764
			0.07762	0.75474		0.08141	0.75441
			0.08351	0.76104		0.08141	0.75477
			0.08432	0.76499		0.08718	0.75731
			0.08432	0.76572		0.08822	0.76433
			0.08907	0.76679		0.08822	0.76881
			0.09093	0.76908		0.09248	0.77015
			0.09127	0.77306		0.09424	0.77183
			0.09127	0.77881		0.09484	0.77665
			0.09604	0.78237		0.09484	0.78268
			0.09753	0.78172		0.09949	0.78764
			0.09753	0.78249		0.10124	0.79104
			0.09753	0.7827		0.10138	0.79287
			0.10319	0.78465		0.10138	0.79518
			0.10424	0.79016		0.10655	0.79907
			0.10424	0.79898		0.10802	0.80526
			0.10855	0.80688		0.10802	0.80956
			0.11033	0.81159		0.10802	0.80931
			0.11087	0.81014		0.1137	0.8011
			0.11087	0.80888		0.11461	0.80092
			0.1154	0.81518		0.11461	0.80813
			0.11707	0.82292		0.11902	0.81214
			0.11707	0.82324		0.12079	0.81474
			0.11707	0.82607		0.12138	0.81478
			0.12246	0.82761		0.12138	0.81799
			0.1239	0.82773		0.12587	0.82585
			0.1239	0.83038		0.12755	0.83138
			0.1239	0.83199		0.12781	0.83415
			0.12965	0.83101		0.12781	0.8305
			0.13073	0.83095		0.13297	0.82046
			0.13073	0.83175		0.13452	0.81352
			0.135	0.82896		0.13452	0.81957
			0.13678	0.82605		0.13452	0.82941
			0.13742	0.82889		0.14003	0.82661
			0.13742	0.83453		0.14112	0.82471
			0.14188	0.83969		0.14112	0.82914
			0.14356	0.84262		0.14524	0.83256
			0.14356	0.84429		0.14697	0.83222
			0.14356	0.84717		0.14753	0.83339
			0.14899	0.84845		0.14753	0.83285
			0.1505	0.85039		0.15237	0.83198
			0.1505	0.85433		0.15417	0.833
			0.1505	0.86021		0.15429	0.83656
			0.15576	0.86171		0.15429	0.8394
			0.1567	0.86191		0.15928	0.84328
			0.1567	0.86209		0.16074	0.85084
			0.1611	0.86273		0.16074	0.85444
			0.16291	0.86384		0.16074	0.85372
			0.16351	0.86665		0.16612	0.8546
			0.16351	0.86862		0.16717	0.85804
			0.16802	0.86907		0.16717	0.86063
			0.16971	0.86841		0.17131	0.86484
			0.16987	0.86843		0.17305	0.86812
			0.16987	0.86856		0.17362	0.86839
			0.17494	0.87206		0.17362	0.86755
			0.17636	0.87608		0.17842	0.86573
			0.17636	0.87811		0.18022	0.86571
			0.17636	0.88238		0.18046	0.86518
			0.18193	0.88565		0.18046	0.86003
			0.1829	0.88536		0.18531	0.86104
			0.1829	0.88344		0.18665	0.8622
			0.18734	0.87927		0.18665	0.86121
			0.18916	0.8799		0.18665	0.86443
			0.18969	0.88411		0.1924	0.86685
			0.18969	0.88793		0.19338	0.86146
			0.19426	0.8885		0.19338	0.85903
			0.19594	0.88752		0.1978	0.86452
			0.19611	0.88627		0.1996	0.86779
			0.19612	0.88546		0.20003	0.8707
			0.20126	0.88229		0.20003	0.86643
			0.20286	0.88074		0.20494	0.86441
			0.20286	0.87942		0.2065	0.86901
			0.20286	0.87911		0.2065	0.87243
			0.20833	0.88359		0.2065	0.87338
			0.20954	0.88805		0.2119	0.87087
			0.20954	0.89141		0.21292	0.86982
			0.21359	0.88649		0.21292	0.87322
			0.21534	0.88386		0.21717	0.87348
			0.21602	0.88693		0.21894	0.86924
			0.21602	0.88894		0.21956	0.87322
			0.22069	0.89305		0.21956	0.87608
			0.22247	0.90028		0.22425	0.87506
			0.22276	0.90082		0.22602	0.8741
			0.22276	0.89595		0.22634	0.8765
			0.22791	0.88859		0.22634	0.88017
			0.22947	0.89129		0.2311	0.88414
			0.22947	0.89586		0.2327	0.88656
			0.22947	0.90062		0.2327	0.89101
			0.23483	0.90716		0.2327	0.89712
			0.23586	0.90663		0.2382	0.89326
			0.23586	0.90412		0.23941	0.89451
			0.24017	0.90526		0.23941	0.89493
			0.24197	0.9037		0.23941	0.88632
			0.24252	0.90407		0.24501	0.87916
			0.24252	0.91312		0.24581	0.88295
			0.24698	0.91961		0.24581	0.88751
			0.24863	0.91739		0.25021	0.89008
			0.24871	0.91372		0.25196	0.89378
			0.24871	0.90776		0.25245	0.89468
			0.25415	0.9091		0.25245	0.8924
			0.2557	0.91679		0.25734	0.89223
			0.2557	0.91852		0.25914	0.89631
			0.2557	0.91682		0.25925	0.89697
			0.26096	0.91776		0.25925	0.89444
			0.26195	0.92001		0.26423	0.89532
			0.26195	0.91834		0.26552	0.89936
			0.26621	0.91081		0.26552	0.90359
			0.26798	0.90527		0.26552	0.9036
			0.26867	0.90679		0.27132	0.90726
			0.26867	0.91181		0.27231	0.91277
			0.2733	0.91869		0.27231	0.91006
			0.27507	0.92406		0.2767	0.90399
			0.27522	0.92597		0.27849	0.9001
			0.27522	0.92349		0.27901	0.9041
			0.28033	0.91663		0.27901	0.90556
			0.28183	0.91289		0.28365	0.90164
			0.28183	0.91115		0.28536	0.89787
			0.28183	0.91173		0.2855	0.89675
			0.2873	0.917		0.2855	0.89628
			0.28836	0.92155		0.29054	0.89557
			0.28836	0.92485		0.29196	0.89586
			0.28836	0.92534		0.29197	0.89461
			0.2944	0.92334		0.29197	0.89245
			0.29519	0.92455		0.29754	0.89522
			0.29519	0.9279		0.29863	0.9025
			0.29971	0.92966		0.29863	0.90432
			0.30148	0.92717		0.30278	0.90188
			0.30176	0.92088		0.30452	0.8941
			0.30176	0.91751		0.30522	0.89034
			0.3066	0.91818		0.30522	0.89085
			0.30828	0.9191		0.30974	0.89066
			0.30828	0.92036		0.31148	0.88555
			0.30828	0.92774		0.31171	0.88595
			0.31352	0.93666		0.31171	0.88975
			0.3148	0.94116		0.31697	0.88903
			0.3148	0.94233		0.31856	0.88706
			0.3148	0.93822		0.31856	0.88819
			0.32045	0.93211		0.31856	0.89105
			0.32138	0.92953		0.32407	0.89569
			0.32138	0.92995		0.32517	0.90359
			0.32566	0.9273		0.32517	0.90463
			0.32741	0.92633		0.32925	0.89687
			0.32799	0.92915		0.33096	0.88748
			0.32799	0.93246		0.3316	0.88054
			0.33282	0.93586		0.3316	0.87876
			0.33464	0.93906		0.33627	0.88321
			0.33478	0.94152		0.33804	0.89283
			0.33478	0.94034		0.33815	0.90027
			0.33988	0.93693		0.33815	0.89826
			0.34133	0.93258		0.34327	0.902
			0.34133	0.92744		0.3445	0.90472
			0.34133	0.92486		0.3445	0.90168
			0.347	0.92809		0.34845	0.89687
			0.34812	0.93377		0.35017	0.89167
			0.34812	0.93883		0.3509	0.88872
			0.34812	0.93297		0.3509	0.88999
			0.35388	0.92497		0.35547	0.89325
			0.3547	0.92334		0.35725	0.89264
			0.3547	0.92557		0.35754	0.89552
			0.35905	0.92856		0.35754	0.89982
			0.36078	0.9308		0.36249	0.89695
			0.36112	0.9347		0.36404	0.88751
			0.36112	0.94574		0.36404	0.8852
			0.36599	0.9586		0.36404	0.89569
			0.3676	0.96155		0.36948	0.90047
			0.3676	0.95608		0.37069	0.89728
			0.3676	0.94725		0.37069	0.89515
			0.37294	0.93848		0.37069	0.89834
			0.37404	0.93874		0.37646	0.89937
			0.37404	0.93973		0.37733	0.89861
			0.37818	0.9359		0.37733	0.89689
			0.37993	0.93048		0.38178	0.89347
			0.38065	0.92669		0.38355	0.89027
			0.38065	0.92884		0.38396	0.88687
			0.38547	0.93138		0.38396	0.88453
			0.38733	0.92468		0.38868	0.8915
			0.38759	0.91864		0.39039	0.90168
			0.38759	0.92432		0.39048	0.90696
			0.3924	0.92681		0.39048	0.90967
			0.39389	0.92677		0.39586	0.90477
			0.39389	0.92561		0.39738	0.89942
			0.39389	0.92875		0.39738	0.895
			0.39934	0.93268		0.39738	0.89252
			0.40037	0.93393		0.40281	0.89459
			0.40037	0.93958		0.40378	0.89521
			0.40479	0.94705		0.40378	0.89525
			0.40662	0.95091		0.408	0.89995
			0.40729	0.94565		0.40974	0.90689
			0.40729	0.9378		0.41032	0.90771
			0.41193	0.93791		0.41032	0.90316
			0.41369	0.93887		0.41496	0.90082
			0.41398	0.93945		0.4167	0.89833
			0.41398	0.94244		0.41679	0.89422
			0.41872	0.94869		0.41679	0.90061
			0.42023	0.95046		0.42228	0.90867
			0.42024	0.94758		0.42367	0.90951
			0.42024	0.94322		0.42367	0.90295
			0.42595	0.94183		0.42367	0.8945
			0.4272	0.93813		0.42933	0.8926
			0.4272	0.93256		0.43014	0.90118
			0.4272	0.93512		0.43014	0.90126
			0.43307	0.93797		0.4344	0.90286
			0.43391	0.93732		0.43608	0.90913
			0.43391	0.9372		0.4365	0.91606
			0.43826	0.93959		0.4365	0.91736
			0.43998	0.94526		0.44156	0.91663
			0.44045	0.94957		0.4434	0.91299
			0.44045	0.95117		0.44348	0.90899
			0.44504	0.94982		0.44348	0.91088
			0.44672	0.94671		0.44856	0.91388
			0.44679	0.94414		0.45004	0.91182
			0.44679	0.94087		0.45004	0.9053
			0.45218	0.94152		0.45004	0.90317
			0.45362	0.94343		0.45566	0.90452
			0.45362	0.94408		0.45675	0.9085
			0.45362	0.94791		0.45675	0.91328
			0.4591	0.95086		0.46091	0.91564
			0.46002	0.9539		0.46265	0.91316
[truncated: 324 more rows]
